# Supplementary material for: Dianhydrogalactitol Overcomes Multiple Temozolomide Resistance Mechanisms in Glioblastoma
Source: Oxford University Press journal article supplement (doi:10.1158/1535-7163.mct-20-0319), 2021-04-12
Supplement: 15357163mct200319-sup-241905_3_supp_6926795_q444qz.xlsx [file 15357163mct200319-sup-241905_3_supp_6926795_q444qz.xlsx]

## Sheet: Table_S1
#Supplementary Table I. DDR shRNA library oligo sequences
EntrezID	Name	97bpOligo	Pool
328	APEX1.1187	TGCTGTTGACAGTGAGCGATCGGCAGTGATCACTGTCCTATAGTGAAGCCACAGATGTATAGGACAGTGATCACTGCCGAGTGCCTACTGCCTCGGA	Pool_11
328	APEX1.1358	TGCTGTTGACAGTGAGCGATCCTGTGATAGAGTTCTTTTATAGTGAAGCCACAGATGTATAAAAGAACTCTATCACAGGAGTGCCTACTGCCTCGGA	Pool_11
328	APEX1.538	TGCTGTTGACAGTGAGCGACCAGATATACTGTGCCTTCAATAGTGAAGCCACAGATGTATTGAAGGCACAGTATATCTGGGTGCCTACTGCCTCGGA	Pool_11
328	APEX1.496	TGCTGTTGACAGTGAGCGATGGATTAAGAAGAAAGGATTATAGTGAAGCCACAGATGTATAATCCTTTCTTCTTAATCCAGTGCCTACTGCCTCGGA	Pool_11
328	APEX1.489	TGCTGTTGACAGTGAGCGCTCGAGCCTGGATTAAGAAGAATAGTGAAGCCACAGATGTATTCTTCTTAATCCAGGCTCGAATGCCTACTGCCTCGGA	Pool_11
328	APEX1.557	TGCTGTTGACAGTGAGCGAAAGAGACCAAATGTTCAGAGATAGTGAAGCCACAGATGTATCTCTGAACATTTGGTCTCTTGTGCCTACTGCCTCGGA	Pool_11
56647	BCCIP.445	TGCTGTTGACAGTGAGCGACAGTGTGTTGAACAAATTCAATAGTGAAGCCACAGATGTATTGAATTTGTTCAACACACTGGTGCCTACTGCCTCGGA	Pool_11
56647	BCCIP.755	TGCTGTTGACAGTGAGCGCAAGCTGCGTTAATGTTTGCAATAGTGAAGCCACAGATGTATTGCAAACATTAACGCAGCTTTTGCCTACTGCCTCGGA	Pool_11
56647	BCCIP.296	TGCTGTTGACAGTGAGCGACAGAACTAACAGATCTCTTAATAGTGAAGCCACAGATGTATTAAGAGATCTGTTAGTTCTGCTGCCTACTGCCTCGGA	Pool_11
56647	BCCIP.682	TGCTGTTGACAGTGAGCGCTACCTTCTGATTAGTAAGACATAGTGAAGCCACAGATGTATGTCTTACTAATCAGAAGGTAATGCCTACTGCCTCGGA	Pool_11
56647	BCCIP.187	TGCTGTTGACAGTGAGCGCGACGAGGAAGTGAATATTGAATAGTGAAGCCACAGATGTATTCAATATTCACTTCCTCGTCATGCCTACTGCCTCGGA	Pool_11
56647	BCCIP.444	TGCTGTTGACAGTGAGCGACCAGTGTGTTGAACAAATTCATAGTGAAGCCACAGATGTATGAATTTGTTCAACACACTGGGTGCCTACTGCCTCGGA	Pool_11
54541	DDIT4.1680	TGCTGTTGACAGTGAGCGCACACTTGATGTTCAAGTATTATAGTGAAGCCACAGATGTATAATACTTGAACATCAAGTGTATGCCTACTGCCTCGGA	Pool_11
54541	DDIT4.1360	TGCTGTTGACAGTGAGCGAAAGTGTGTTTGTTGTTTGTTTTAGTGAAGCCACAGATGTAAAACAAACAACAAACACACTTGTGCCTACTGCCTCGGA	Pool_11
54541	DDIT4.161	TGCTGTTGACAGTGAGCGACACTCTGAGTTCATCAGCAAATAGTGAAGCCACAGATGTATTTGCTGATGAACTCAGAGTGCTGCCTACTGCCTCGGA	Pool_11
54541	DDIT4.1679	TGCTGTTGACAGTGAGCGCTACACTTGATGTTCAAGTATTTAGTGAAGCCACAGATGTAAATACTTGAACATCAAGTGTATTGCCTACTGCCTCGGA	Pool_11
54541	DDIT4.1681	TGCTGTTGACAGTGAGCGCCACTTGATGTTCAAGTATTAATAGTGAAGCCACAGATGTATTAATACTTGAACATCAAGTGTTGCCTACTGCCTCGGA	Pool_11
54541	DDIT4.836	TGCTGTTGACAGTGAGCGACACTGGCTTCCGAGTCATCAATAGTGAAGCCACAGATGTATTGATGACTCGGAAGCCAGTGCTGCCTACTGCCTCGGA	Pool_11
4683	NBN.1890	TGCTGTTGACAGTGAGCGAAAGGATGGATATAGAAACAAATAGTGAAGCCACAGATGTATTTGTTTCTATATCCATCCTTGTGCCTACTGCCTCGGA	Pool_11
4683	NBN.858	TGCTGTTGACAGTGAGCGATAGGTTGATAACAGAAGAGAATAGTGAAGCCACAGATGTATTCTCTTCTGTTATCAACCTAGTGCCTACTGCCTCGGA	Pool_11
4683	NBN.4019	TGCTGTTGACAGTGAGCGCTCGGTGTGTAGTGATGTTTCATAGTGAAGCCACAGATGTATGAAACATCACTACACACCGATTGCCTACTGCCTCGGA	Pool_11
4683	NBN.4121	TGCTGTTGACAGTGAGCGATCGGATATATGTATTGAGATATAGTGAAGCCACAGATGTATATCTCAATACATATATCCGACTGCCTACTGCCTCGGA	Pool_11
4683	NBN.1858	TGCTGTTGACAGTGAGCGCCAGGAGGAAGATGTCAATGTTTAGTGAAGCCACAGATGTAAACATTGACATCTTCCTCCTGTTGCCTACTGCCTCGGA	Pool_11
4683	NBN.2970	TGCTGTTGACAGTGAGCGCCACCTACATGTTATTCTAGTATAGTGAAGCCACAGATGTATACTAGAATAACATGTAGGTGATGCCTACTGCCTCGGA	Pool_11
55544	RBM38.1632	TGCTGTTGACAGTGAGCGCGACGACGATAGTGTTTCTGTATAGTGAAGCCACAGATGTATACAGAAACACTATCGTCGTCTTGCCTACTGCCTCGGA	Pool_11
55544	RBM38.1635	TGCTGTTGACAGTGAGCGAGACGATAGTGTTTCTGTATAATAGTGAAGCCACAGATGTATTATACAGAAACACTATCGTCGTGCCTACTGCCTCGGA	Pool_11
55544	RBM38.1266	TGCTGTTGACAGTGAGCGCAACCTGAAAGCAAGAAGTTAATAGTGAAGCCACAGATGTATTAACTTCTTGCTTTCAGGTTTTGCCTACTGCCTCGGA	Pool_11
55544	RBM38.2256	TGCTGTTGACAGTGAGCGCAAGGTAGCTAATCTCATCATATAGTGAAGCCACAGATGTATATGATGAGATTAGCTACCTTTTGCCTACTGCCTCGGA	Pool_11
55544	RBM38.1277	TGCTGTTGACAGTGAGCGAAAGAAGTTAATGGACTGTTTATAGTGAAGCCACAGATGTATAAACAGTCCATTAACTTCTTGTGCCTACTGCCTCGGA	Pool_11
55544	RBM38.2246	TGCTGTTGACAGTGAGCGATCAGAGAATAAAGGTAGCTAATAGTGAAGCCACAGATGTATTAGCTACCTTTATTCTCTGAGTGCCTACTGCCTCGGA	Pool_11
6188	RPS3.508	TGCTGTTGACAGTGAGCGCCAGCGGAGACCCTGTTAACTATAGTGAAGCCACAGATGTATAGTTAACAGGGTCTCCGCTGTTGCCTACTGCCTCGGA	Pool_11
6188	RPS3.163	TGCTGTTGACAGTGAGCGACAGGACAGAAATCATTATCTTTAGTGAAGCCACAGATGTAAAGATAATGATTTCTGTCCTGGTGCCTACTGCCTCGGA	Pool_11
6188	RPS3.164	TGCTGTTGACAGTGAGCGAAGGACAGAAATCATTATCTTATAGTGAAGCCACAGATGTATAAGATAATGATTTCTGTCCTGTGCCTACTGCCTCGGA	Pool_11
6188	RPS3.36	TGCTGTTGACAGTGAGCGACAGTGCAAATATCCAAGAAGATAGTGAAGCCACAGATGTATCTTCTTGGATATTTGCACTGCTGCCTACTGCCTCGGA	Pool_11
6188	RPS3.230	TGCTGTTGACAGTGAGCGCCGGGAACTGACTGCTGTAGTTTAGTGAAGCCACAGATGTAAACTACAGCAGTCAGTTCCCGATGCCTACTGCCTCGGA	Pool_11
6188	RPS3.25	TGCTGTTGACAGTGAGCGACGGCAAGATGGCAGTGCAAATTAGTGAAGCCACAGATGTAATTTGCACTGCCATCTTGCCGCTGCCTACTGCCTCGGA	Pool_11
6659	SOX4.2293	TGCTGTTGACAGTGAGCGCAAGGACAGACGAAGAGTTTAATAGTGAAGCCACAGATGTATTAAACTCTTCGTCTGTCCTTTTGCCTACTGCCTCGGA	Pool_11
6659	SOX4.2300	TGCTGTTGACAGTGAGCGCGACGAAGAGTTTAAAGAGAAATAGTGAAGCCACAGATGTATTTCTCTTTAAACTCTTCGTCTTGCCTACTGCCTCGGA	Pool_11
6659	SOX4.4497	TGCTGTTGACAGTGAGCGCCAGGTTTATAGCTGTTGTGTTTAGTGAAGCCACAGATGTAAACACAACAGCTATAAACCTGATGCCTACTGCCTCGGA	Pool_11
6659	SOX4.4446	TGCTGTTGACAGTGAGCGATCGCTAAATATAATTGTTTTATAGTGAAGCCACAGATGTATAAAACAATTATATTTAGCGACTGCCTACTGCCTCGGA	Pool_11
6659	SOX4.4776	TGCTGTTGACAGTGAGCGACAGCTAATCATGTCAAGTTCATAGTGAAGCCACAGATGTATGAACTTGACATGATTAGCTGGTGCCTACTGCCTCGGA	Pool_11
6659	SOX4.2298	TGCTGTTGACAGTGAGCGCCAGACGAAGAGTTTAAAGAGATAGTGAAGCCACAGATGTATCTCTTTAAACTCTTCGTCTGTTGCCTACTGCCTCGGA	Pool_11
9960	USP3.559	TGCTGTTGACAGTGAGCGCCAGCAAGTTATTAAAAGTAAATAGTGAAGCCACAGATGTATTTACTTTTAATAACTTGCTGTTGCCTACTGCCTCGGA	Pool_11
9960	USP3.2131	TGCTGTTGACAGTGAGCGAAAGGATCATGTGTGCACAATATAGTGAAGCCACAGATGTATATTGTGCACACATGATCCTTGTGCCTACTGCCTCGGA	Pool_11
9960	USP3.397	TGCTGTTGACAGTGAGCGATAGCTACAGTACATACTGTTATAGTGAAGCCACAGATGTATAACAGTATGTACTGTAGCTACTGCCTACTGCCTCGGA	Pool_11
9960	USP3.2305	TGCTGTTGACAGTGAGCGCTCAGTTGTACTTGTCCTGCAATAGTGAAGCCACAGATGTATTGCAGGACAAGTACAACTGAATGCCTACTGCCTCGGA	Pool_11
9960	USP3.558	TGCTGTTGACAGTGAGCGCACAGCAAGTTATTAAAAGTAATAGTGAAGCCACAGATGTATTACTTTTAATAACTTGCTGTTTGCCTACTGCCTCGGA	Pool_11
9960	USP3.464	TGCTGTTGACAGTGAGCGCCAGAAAGTCAGAGAACACTTATAGTGAAGCCACAGATGTATAAGTGTTCTCTGACTTTCTGTTGCCTACTGCCTCGGA	Pool_11
835	CASP2.2386	TGCTGTTGACAGTGAGCGCCAGGATCATGTAAATGCTCAATAGTGAAGCCACAGATGTATTGAGCATTTACATGATCCTGTTGCCTACTGCCTCGGA	Pool_11
835	CASP2.3113	TGCTGTTGACAGTGAGCGACAGGATTTGGTTGTTTAAATATAGTGAAGCCACAGATGTATATTTAAACAACCAAATCCTGGTGCCTACTGCCTCGGA	Pool_11
835	CASP2.2944	TGCTGTTGACAGTGAGCGCCAGAGTAGTTTTGGTTTTTAATAGTGAAGCCACAGATGTATTAAAAACCAAAACTACTCTGTTGCCTACTGCCTCGGA	Pool_11
835	CASP2.2998	TGCTGTTGACAGTGAGCGCAAGGTGAGTTCTCACTATGTTTAGTGAAGCCACAGATGTAAACATAGTGAGAACTCACCTTATGCCTACTGCCTCGGA	Pool_11
835	CASP2.2262	TGCTGTTGACAGTGAGCGACACTTCATATCTAGATTTCTATAGTGAAGCCACAGATGTATAGAAATCTAGATATGAAGTGCTGCCTACTGCCTCGGA	Pool_11
835	CASP2.2493	TGCTGTTGACAGTGAGCGCCATGTTATTGTTTTCAACCTATAGTGAAGCCACAGATGTATAGGTTGAAAACAATAACATGTTGCCTACTGCCTCGGA	Pool_11
51366	UBR5.10849	TGCTGTTGACAGTGAGCGCACGGTTCTAAATGTAAAATAATAGTGAAGCCACAGATGTATTATTTTACATTTAGAACCGTTTGCCTACTGCCTCGGA	Pool_11
51366	UBR5.1959	TGCTGTTGACAGTGAGCGCAAGGAAGAAAATGTTAGAGAATAGTGAAGCCACAGATGTATTCTCTAACATTTTCTTCCTTTTGCCTACTGCCTCGGA	Pool_11
51366	UBR5.10313	TGCTGTTGACAGTGAGCGCGAGGATAGTCTTCATGTTCAATAGTGAAGCCACAGATGTATTGAACATGAAGACTATCCTCATGCCTACTGCCTCGGA	Pool_11
51366	UBR5.9802	TGCTGTTGACAGTGAGCGCCAGAAGAAATGTCAAGTAATATAGTGAAGCCACAGATGTATATTACTTGACATTTCTTCTGTTGCCTACTGCCTCGGA	Pool_11
51366	UBR5.4061	TGCTGTTGACAGTGAGCGATGGAGTCACTGTGTTGTTGTATAGTGAAGCCACAGATGTATACAACAACACAGTGACTCCAGTGCCTACTGCCTCGGA	Pool_11
51366	UBR5.8028	TGCTGTTGACAGTGAGCGAAAGGTTGAATTGTTTCAGAAATAGTGAAGCCACAGATGTATTTCTGAAACAATTCAACCTTGTGCCTACTGCCTCGGA	Pool_11
64782	AEN.2404	TGCTGTTGACAGTGAGCGCAGGGTTGTAATGAGCACTAAATAGTGAAGCCACAGATGTATTTAGTGCTCATTACAACCCTATGCCTACTGCCTCGGA	Pool_11
64782	AEN.2648	TGCTGTTGACAGTGAGCGCCAGCAGCAAGGTTCACGGATATAGTGAAGCCACAGATGTATATCCGTGAACCTTGCTGCTGTTGCCTACTGCCTCGGA	Pool_11
64782	AEN.3081	TGCTGTTGACAGTGAGCGCACCATTTGTTCTAGAATAAAATAGTGAAGCCACAGATGTATTTTATTCTAGAACAAATGGTTTGCCTACTGCCTCGGA	Pool_11
64782	AEN.1028	TGCTGTTGACAGTGAGCGACAGCACAGACATGGAACAGTATAGTGAAGCCACAGATGTATACTGTTCCATGTCTGTGCTGCTGCCTACTGCCTCGGA	Pool_11
64782	AEN.542	TGCTGTTGACAGTGAGCGACCGCTGTTCCATTGTGAGCTATAGTGAAGCCACAGATGTATAGCTCACAATGGAACAGCGGGTGCCTACTGCCTCGGA	Pool_11
64782	AEN.3060	TGCTGTTGACAGTGAGCGCTAAGATCAGCTTTGTTGTAAATAGTGAAGCCACAGATGTATTTACAACAAAGCTGATCTTAATGCCTACTGCCTCGGA	Pool_11
641	BLM.285	TGCTGTTGACAGTGAGCGCAAAGATGTTAATGTTACCGAATAGTGAAGCCACAGATGTATTCGGTAACATTAACATCTTTATGCCTACTGCCTCGGA	Pool_11
641	BLM.1957	TGCTGTTGACAGTGAGCGCCAGAGTCAATTCAGAATTATATAGTGAAGCCACAGATGTATATAATTCTGAATTGACTCTGATGCCTACTGCCTCGGA	Pool_11
641	BLM.1332	TGCTGTTGACAGTGAGCGCACGGAAGTAGATTTTAATAAATAGTGAAGCCACAGATGTATTTATTAAAATCTACTTCCGTTTGCCTACTGCCTCGGA	Pool_11
641	BLM.4418	TGCTGTTGACAGTGAGCGCAAAGCTGTTATTCTTGTTATATAGTGAAGCCACAGATGTATATAACAAGAATAACAGCTTTATGCCTACTGCCTCGGA	Pool_11
641	BLM.2919	TGCTGTTGACAGTGAGCGCCAGGTTATCTGTGCTACAATTTAGTGAAGCCACAGATGTAAATTGTAGCACAGATAACCTGATGCCTACTGCCTCGGA	Pool_11
641	BLM.925	TGCTGTTGACAGTGAGCGAAAGAAGCTGAATTACATTCAATAGTGAAGCCACAGATGTATTGAATGTAATTCAGCTTCTTCTGCCTACTGCCTCGGA	Pool_11
836	CASP3.2136	TGCTGTTGACAGTGAGCGCAAGGAAAATAGTAATGTTTTATAGTGAAGCCACAGATGTATAAAACATTACTATTTTCCTTTTGCCTACTGCCTCGGA	Pool_11
836	CASP3.1108	TGCTGTTGACAGTGAGCGCCAGGTAGTTGCAATTGAATTATAGTGAAGCCACAGATGTATAATTCAATTGCAACTACCTGATGCCTACTGCCTCGGA	Pool_11
836	CASP3.1775	TGCTGTTGACAGTGAGCGCTAGGAACATATGAAAATACAATAGTGAAGCCACAGATGTATTGTATTTTCATATGTTCCTATTGCCTACTGCCTCGGA	Pool_11
836	CASP3.2116	TGCTGTTGACAGTGAGCGCTCTGTTGAAGTTTACAATCAATAGTGAAGCCACAGATGTATTGATTGTAAACTTCAACAGAATGCCTACTGCCTCGGA	Pool_11
836	CASP3.2432	TGCTGTTGACAGTGAGCGCAAGTGTGTTTCTATGTGACAATAGTGAAGCCACAGATGTATTGTCACATAGAAACACACTTTTGCCTACTGCCTCGGA	Pool_11
836	CASP3.1301	TGCTGTTGACAGTGAGCGCAAGACTGTGTATTCTAGTTTTTAGTGAAGCCACAGATGTAAAAACTAGAATACACAGTCTTATGCCTACTGCCTCGGA	Pool_11
1453	CSNK1D.3278	TGCTGTTGACAGTGAGCGATGGGAGCTGTGTGTTGAAGTATAGTGAAGCCACAGATGTATACTTCAACACACAGCTCCCACTGCCTACTGCCTCGGA	Pool_11
1453	CSNK1D.3646	TGCTGTTGACAGTGAGCGACACTGTATTTGTGTACTTTAATAGTGAAGCCACAGATGTATTAAAGTACACAAATACAGTGGTGCCTACTGCCTCGGA	Pool_11
1453	CSNK1D.1675	TGCTGTTGACAGTGAGCGACCGGTCTAGGATCGAAATGTTTAGTGAAGCCACAGATGTAAACATTTCGATCCTAGACCGGGTGCCTACTGCCTCGGA	Pool_11
1453	CSNK1D.2535	TGCTGTTGACAGTGAGCGAAACCGAGAGGTGGTTACTGTATAGTGAAGCCACAGATGTATACAGTAACCACCTCTCGGTTCTGCCTACTGCCTCGGA	Pool_11
1453	CSNK1D.1936	TGCTGTTGACAGTGAGCGCACCAATCTTCTACTTGGTTAATAGTGAAGCCACAGATGTATTAACCAAGTAGAAGATTGGTATGCCTACTGCCTCGGA	Pool_11
1453	CSNK1D.999	TGCTGTTGACAGTGAGCGAACCAAGAGACAGAAATACGAATAGTGAAGCCACAGATGTATTCGTATTTCTGTCTCTTGGTGTGCCTACTGCCTCGGA	Pool_11
1643	DDB2.1471	TGCTGTTGACAGTGAGCGAACGGAAGTGAGAGACACTAAATAGTGAAGCCACAGATGTATTTAGTGTCTCTCACTTCCGTGTGCCTACTGCCTCGGA	Pool_11
1643	DDB2.1470	TGCTGTTGACAGTGAGCGCCACGGAAGTGAGAGACACTAATAGTGAAGCCACAGATGTATTAGTGTCTCTCACTTCCGTGTTGCCTACTGCCTCGGA	Pool_11
1643	DDB2.1732	TGCTGTTGACAGTGAGCGACAAGGTTATCTTGGAACTAAATAGTGAAGCCACAGATGTATTTAGTTCCAAGATAACCTTGGTGCCTACTGCCTCGGA	Pool_11
1643	DDB2.980	TGCTGTTGACAGTGAGCGATCCGTAGATCAAACAGTGAAATAGTGAAGCCACAGATGTATTTCACTGTTTGATCTACGGAGTGCCTACTGCCTCGGA	Pool_11
1643	DDB2.328	TGCTGTTGACAGTGAGCGATAGCAGAAGATGTGACTCAGATAGTGAAGCCACAGATGTATCTGAGTCACATCTTCTGCTAGTGCCTACTGCCTCGGA	Pool_11
1643	DDB2.1784	TGCTGTTGACAGTGAGCGAAGGGATCAAGCAGTTATTTGATAGTGAAGCCACAGATGTATCAAATAACTGCTTGATCCCTCTGCCTACTGCCTCGGA	Pool_11
2188	FANCF.1460	TGCTGTTGACAGTGAGCGACAGCTTTAAAGTGACAAACAATAGTGAAGCCACAGATGTATTGTTTGTCACTTTAAAGCTGCTGCCTACTGCCTCGGA	Pool_11
2188	FANCF.2907	TGCTGTTGACAGTGAGCGCCACACTATGATTTACAATAAATAGTGAAGCCACAGATGTATTTATTGTAAATCATAGTGTGATGCCTACTGCCTCGGA	Pool_11
2188	FANCF.1035	TGCTGTTGACAGTGAGCGACAGGATGGAGATTTTGAAGTATAGTGAAGCCACAGATGTATACTTCAAAATCTCCATCCTGCTGCCTACTGCCTCGGA	Pool_11
2188	FANCF.3078	TGCTGTTGACAGTGAGCGCACGCTAAAAGATTAAGTAAAATAGTGAAGCCACAGATGTATTTTACTTAATCTTTTAGCGTATGCCTACTGCCTCGGA	Pool_11
2188	FANCF.3077	TGCTGTTGACAGTGAGCGCTACGCTAAAAGATTAAGTAAATAGTGAAGCCACAGATGTATTTACTTAATCTTTTAGCGTATTGCCTACTGCCTCGGA	Pool_11
2188	FANCF.2567	TGCTGTTGACAGTGAGCGCAAAGAGTTGTATAATCTTGTATAGTGAAGCCACAGATGTATACAAGATTATACAACTCTTTTTGCCTACTGCCTCGGA	Pool_11
3665	IRF7.1612	TGCTGTTGACAGTGAGCGAAGGGTGTGTCTTCCCTGGATATAGTGAAGCCACAGATGTATATCCAGGGAAGACACACCCTCTGCCTACTGCCTCGGA	Pool_11
3665	IRF7.1667	TGCTGTTGACAGTGAGCGCCAGCCTCTATGACGACATCGATAGTGAAGCCACAGATGTATCGATGTCGTCATAGAGGCTGTTGCCTACTGCCTCGGA	Pool_11
3665	IRF7.1724	TGCTGTTGACAGTGAGCGCCCCAGTCTAATGAGAACTCCATAGTGAAGCCACAGATGTATGGAGTTCTCATTAGACTGGGTTGCCTACTGCCTCGGA	Pool_11
3665	IRF7.1781	TGCTGTTGACAGTGAGCGACGCCCAGTCTAATAAAAAGAATAGTGAAGCCACAGATGTATTCTTTTTATTAGACTGGGCGGTGCCTACTGCCTCGGA	Pool_11
3665	IRF7.1780	TGCTGTTGACAGTGAGCGACCGCCCAGTCTAATAAAAAGATAGTGAAGCCACAGATGTATCTTTTTATTAGACTGGGCGGCTGCCTACTGCCTCGGA	Pool_11
3665	IRF7.1325	TGCTGTTGACAGTGAGCGACAAGTGCAAGGTGTACTGGGATAGTGAAGCCACAGATGTATCCCAGTACACCTTGCACTTGCTGCCTACTGCCTCGGA	Pool_11
6672	SP100.514	TGCTGTTGACAGTGAGCGCAGCACTGTTCAGCGATGTCAATAGTGAAGCCACAGATGTATTGACATCGCTGAACAGTGCTTTGCCTACTGCCTCGGA	Pool_11
6672	SP100.1756	TGCTGTTGACAGTGAGCGAAAGGCATAGATCTAAAGTAAATAGTGAAGCCACAGATGTATTTACTTTAGATCTATGCCTTCTGCCTACTGCCTCGGA	Pool_11
6672	SP100.887	TGCTGTTGACAGTGAGCGATGCGAACAAATTGCTGTCCAATAGTGAAGCCACAGATGTATTGGACAGCAATTTGTTCGCAGTGCCTACTGCCTCGGA	Pool_11
6672	SP100.414	TGCTGTTGACAGTGAGCGAAAGATTCTCAAGATTCTTGTATAGTGAAGCCACAGATGTATACAAGAATCTTGAGAATCTTCTGCCTACTGCCTCGGA	Pool_11
6672	SP100.1693	TGCTGTTGACAGTGAGCGCTACCATGGATGTTGAAAACAATAGTGAAGCCACAGATGTATTGTTTTCAACATCCATGGTATTGCCTACTGCCTCGGA	Pool_11
6672	SP100.284	TGCTGTTGACAGTGAGCGAAGGCTGCTCTATGACATTGTATAGTGAAGCCACAGATGTATACAATGTCATAGAGCAGCCTGTGCCTACTGCCTCGGA	Pool_11
9557	CHD1L.2972	TGCTGTTGACAGTGAGCGACAGCTTGCTAGTTGCATAATATAGTGAAGCCACAGATGTATATTATGCAACTAGCAAGCTGGTGCCTACTGCCTCGGA	Pool_11
9557	CHD1L.1600	TGCTGTTGACAGTGAGCGCCCAGTTGAGTGAGATACTCAATAGTGAAGCCACAGATGTATTGAGTATCTCACTCAACTGGATGCCTACTGCCTCGGA	Pool_11
9557	CHD1L.1184	TGCTGTTGACAGTGAGCGACAGATGTTGGATATTCTCCAATAGTGAAGCCACAGATGTATTGGAGAATATCCAACATCTGGTGCCTACTGCCTCGGA	Pool_11
9557	CHD1L.977	TGCTGTTGACAGTGAGCGAACGGCAAAGAAAGTTAAACTATAGTGAAGCCACAGATGTATAGTTTAACTTTCTTTGCCGTCTGCCTACTGCCTCGGA	Pool_11
9557	CHD1L.2026	TGCTGTTGACAGTGAGCGAAAGGAGACTCATAGAGGAGAATAGTGAAGCCACAGATGTATTCTCCTCTATGAGTCTCCTTCTGCCTACTGCCTCGGA	Pool_11
9557	CHD1L.1814	TGCTGTTGACAGTGAGCGACCCAGTAAGGAAGACAGAAAATAGTGAAGCCACAGATGTATTTTCTGTCTTCCTTACTGGGCTGCCTACTGCCTCGGA	Pool_11
64421	DCLRE1C.718	TGCTGTTGACAGTGAGCGACAGGTTCATGTGAATAAGCTATAGTGAAGCCACAGATGTATAGCTTATTCACATGAACCTGGTGCCTACTGCCTCGGA	Pool_11
64421	DCLRE1C.2981	TGCTGTTGACAGTGAGCGCAAGAGACAAACTAATGCACAATAGTGAAGCCACAGATGTATTGTGCATTAGTTTGTCTCTTTTGCCTACTGCCTCGGA	Pool_11
64421	DCLRE1C.1776	TGCTGTTGACAGTGAGCGCCAGACCAACAATCAAAGAGAATAGTGAAGCCACAGATGTATTCTCTTTGATTGTTGGTCTGTTGCCTACTGCCTCGGA	Pool_11
64421	DCLRE1C.2973	TGCTGTTGACAGTGAGCGCCAGCTGAAAAGAGACAAACTATAGTGAAGCCACAGATGTATAGTTTGTCTCTTTTCAGCTGTTGCCTACTGCCTCGGA	Pool_11
64421	DCLRE1C.3333	TGCTGTTGACAGTGAGCGAAAGCGGACAATTAGAATATAATAGTGAAGCCACAGATGTATTATATTCTAATTGTCCGCTTCTGCCTACTGCCTCGGA	Pool_11
64421	DCLRE1C.1408	TGCTGTTGACAGTGAGCGAAACAGTGAAAGTGAAGAAGAATAGTGAAGCCACAGATGTATTCTTCTTCACTTTCACTGTTGTGCCTACTGCCTCGGA	Pool_11
2968	GTF2H4.1683	TGCTGTTGACAGTGAGCGAAGGGCTTTTCTTGTTTAATAATAGTGAAGCCACAGATGTATTATTAAACAAGAAAAGCCCTGTGCCTACTGCCTCGGA	Pool_11
2968	GTF2H4.1682	TGCTGTTGACAGTGAGCGCCAGGGCTTTTCTTGTTTAATATAGTGAAGCCACAGATGTATATTAAACAAGAAAAGCCCTGATGCCTACTGCCTCGGA	Pool_11
2968	GTF2H4.1292	TGCTGTTGACAGTGAGCGACAGCAGATAATCCATTTCCTATAGTGAAGCCACAGATGTATAGGAAATGGATTATCTGCTGGTGCCTACTGCCTCGGA	Pool_11
2968	GTF2H4.237	TGCTGTTGACAGTGAGCGCACCGAGTACACCTACAATGCATAGTGAAGCCACAGATGTATGCATTGTAGGTGTACTCGGTTTGCCTACTGCCTCGGA	Pool_11
2968	GTF2H4.1012	TGCTGTTGACAGTGAGCGCTGGGCTTGTTTTCCAGAGGAATAGTGAAGCCACAGATGTATTCCTCTGGAAAACAAGCCCAATGCCTACTGCCTCGGA	Pool_11
2968	GTF2H4.449	TGCTGTTGACAGTGAGCGAAAGGCTCAGGAGGAAAGTACATAGTGAAGCCACAGATGTATGTACTTTCCTCCTGAGCCTTGTGCCTACTGCCTCGGA	Pool_11
4170	MCL1.1231	TGCTGTTGACAGTGAGCGCCAGCTTGTAAATGTATTTGTATAGTGAAGCCACAGATGTATACAAATACATTTACAAGCTGTTGCCTACTGCCTCGGA	Pool_11
4170	MCL1.3284	TGCTGTTGACAGTGAGCGAAAGGGTTAGGACCAACTACAATAGTGAAGCCACAGATGTATTGTAGTTGGTCCTAACCCTTCTGCCTACTGCCTCGGA	Pool_11
4170	MCL1.1421	TGCTGTTGACAGTGAGCGCACAGAACGAATTGATGTGTAATAGTGAAGCCACAGATGTATTACACATCAATTCGTTCTGTATGCCTACTGCCTCGGA	Pool_11
4170	MCL1.1936	TGCTGTTGACAGTGAGCGATAAGCCTAGTATGTCAATAAATAGTGAAGCCACAGATGTATTTATTGACATACTAGGCTTAGTGCCTACTGCCTCGGA	Pool_11
4170	MCL1.767	TGCTGTTGACAGTGAGCGCAAGAAGCAAAGTTCAGTTTCATAGTGAAGCCACAGATGTATGAAACTGAACTTTGCTTCTTTTGCCTACTGCCTCGGA	Pool_11
4170	MCL1.2515	TGCTGTTGACAGTGAGCGCAACCTCAGAGTTTAAAAGCTATAGTGAAGCCACAGATGTATAGCTTTTAAACTCTGAGGTTTTGCCTACTGCCTCGGA	Pool_11
80198	MUS81.2289	TGCTGTTGACAGTGAGCGCCCAGTTGGTCCTCATCAAATATAGTGAAGCCACAGATGTATATTTGATGAGGACCAACTGGTTGCCTACTGCCTCGGA	Pool_11
80198	MUS81.1965	TGCTGTTGACAGTGAGCGACAGGACCTTATCCCAGCTCTATAGTGAAGCCACAGATGTATAGAGCTGGGATAAGGTCCTGCTGCCTACTGCCTCGGA	Pool_11
80198	MUS81.2115	TGCTGTTGACAGTGAGCGAAGCCATATGTGTCATGTAGAATAGTGAAGCCACAGATGTATTCTACATGACACATATGGCTGTGCCTACTGCCTCGGA	Pool_11
80198	MUS81.2290	TGCTGTTGACAGTGAGCGACAGTTGGTCCTCATCAAATAATAGTGAAGCCACAGATGTATTATTTGATGAGGACCAACTGGTGCCTACTGCCTCGGA	Pool_11
80198	MUS81.2287	TGCTGTTGACAGTGAGCGCCACCAGTTGGTCCTCATCAAATAGTGAAGCCACAGATGTATTTGATGAGGACCAACTGGTGATGCCTACTGCCTCGGA	Pool_11
80198	MUS81.468	TGCTGTTGACAGTGAGCGACACGCGCTTCGTATTTCAGAATAGTGAAGCCACAGATGTATTCTGAAATACGAAGCGCGTGCTGCCTACTGCCTCGGA	Pool_11
4609	MYC.2210	TGCTGTTGACAGTGAGCGCCAGAATTTCAATCCTAGTATATAGTGAAGCCACAGATGTATATACTAGGATTGAAATTCTGTTGCCTACTGCCTCGGA	Pool_11
4609	MYC.598	TGCTGTTGACAGTGAGCGCCAGGAACTATGACCTCGACTATAGTGAAGCCACAGATGTATAGTCGAGGTCATAGTTCCTGTTGCCTACTGCCTCGGA	Pool_11
4609	MYC.1742	TGCTGTTGACAGTGAGCGACCCAAGGTAGTTATCCTTAAATAGTGAAGCCACAGATGTATTTAAGGATAACTACCTTGGGGTGCCTACTGCCTCGGA	Pool_11
4609	MYC.1715	TGCTGTTGACAGTGAGCGACCGGAGTTGGAAAACAATGAATAGTGAAGCCACAGATGTATTCATTGTTTTCCAACTCCGGGTGCCTACTGCCTCGGA	Pool_11
4609	MYC.929	TGCTGTTGACAGTGAGCGAGACGACGAGACCTTCATCAAATAGTGAAGCCACAGATGTATTTGATGAAGGTCTCGTCGTCCTGCCTACTGCCTCGGA	Pool_11
4609	MYC.2199	TGCTGTTGACAGTGAGCGCTAGCAGTTACACAGAATTTCATAGTGAAGCCACAGATGTATGAAATTCTGTGTAACTGCTATTGCCTACTGCCTCGGA	Pool_11
4841	NONO.2854	TGCTGTTGACAGTGAGCGACAGCATCAACCTATTAAAATATAGTGAAGCCACAGATGTATATTTTAATAGGTTGATGCTGCTGCCTACTGCCTCGGA	Pool_11
4841	NONO.682	TGCTGTTGACAGTGAGCGACAGGCGAAGTCTTCATTCATATAGTGAAGCCACAGATGTATATGAATGAAGACTTCGCCTGCTGCCTACTGCCTCGGA	Pool_11
4841	NONO.1091	TGCTGTTGACAGTGAGCGCTCCAGAGAAGCTGGTTATAAATAGTGAAGCCACAGATGTATTTATAACCAGCTTCTCTGGAATGCCTACTGCCTCGGA	Pool_11
4841	NONO.683	TGCTGTTGACAGTGAGCGAAGGCGAAGTCTTCATTCATAATAGTGAAGCCACAGATGTATTATGAATGAAGACTTCGCCTGTGCCTACTGCCTCGGA	Pool_11
4841	NONO.1092	TGCTGTTGACAGTGAGCGCCCAGAGAAGCTGGTTATAAAATAGTGAAGCCACAGATGTATTTTATAACCAGCTTCTCTGGATGCCTACTGCCTCGGA	Pool_11
4841	NONO.318	TGCTGTTGACAGTGAGCGACAGCCAATAGAATCTAAGAAATAGTGAAGCCACAGATGTATTTCTTAGATTCTATTGGCTGCTGCCTACTGCCTCGGA	Pool_11
79728	PALB2.736	TGCTGTTGACAGTGAGCGCCAGGAAGAAATCAGTAGCAAATAGTGAAGCCACAGATGTATTTGCTACTGATTTCTTCCTGTTGCCTACTGCCTCGGA	Pool_11
79728	PALB2.1610	TGCTGTTGACAGTGAGCGCCAGGACAACCAAGTTCAAGAATAGTGAAGCCACAGATGTATTCTTGAACTTGGTTGTCCTGTTGCCTACTGCCTCGGA	Pool_11
79728	PALB2.539	TGCTGTTGACAGTGAGCGACAGGAGGATTACCTATACAAATAGTGAAGCCACAGATGTATTTGTATAGGTAATCCTCCTGGTGCCTACTGCCTCGGA	Pool_11
79728	PALB2.1418	TGCTGTTGACAGTGAGCGACAGAATATTATGTTAGAACAATAGTGAAGCCACAGATGTATTGTTCTAACATAATATTCTGCTGCCTACTGCCTCGGA	Pool_11
79728	PALB2.2840	TGCTGTTGACAGTGAGCGACCGGTTGTAAAGAGCCATGTATAGTGAAGCCACAGATGTATACATGGCTCTTTACAACCGGCTGCCTACTGCCTCGGA	Pool_11
79728	PALB2.893	TGCTGTTGACAGTGAGCGCAAGGTGTTGATACATTCCTAATAGTGAAGCCACAGATGTATTAGGAATGTATCAACACCTTTTGCCTACTGCCTCGGA	Pool_11
5366	PMAIP1.1224	TGCTGTTGACAGTGAGCGCCAGAAGTAACTTGATAAGATATAGTGAAGCCACAGATGTATATCTTATCAAGTTACTTCTGATGCCTACTGCCTCGGA	Pool_11
5366	PMAIP1.517	TGCTGTTGACAGTGAGCGCACGGAAGATGGAATACATCAATAGTGAAGCCACAGATGTATTGATGTATTCCATCTTCCGTTTGCCTACTGCCTCGGA	Pool_11
5366	PMAIP1.1106	TGCTGTTGACAGTGAGCGATAGACTGAACATTCAATATAATAGTGAAGCCACAGATGTATTATATTGAATGTTCAGTCTACTGCCTACTGCCTCGGA	Pool_11
5366	PMAIP1.1543	TGCTGTTGACAGTGAGCGATGGGCTATATACAGTCCTCAATAGTGAAGCCACAGATGTATTGAGGACTGTATATAGCCCAGTGCCTACTGCCTCGGA	Pool_11
5366	PMAIP1.283	TGCTGTTGACAGTGAGCGAGAAGTCGAGTGTGCTACTCAATAGTGAAGCCACAGATGTATTGAGTAGCACACTCGACTTCCTGCCTACTGCCTCGGA	Pool_11
5366	PMAIP1.1785	TGCTGTTGACAGTGAGCGCAAGATTGTTTATTTAGTGGTATAGTGAAGCCACAGATGTATACCACTAAATAAACAATCTTATGCCTACTGCCTCGGA	Pool_11
11232	POLG2.766	TGCTGTTGACAGTGAGCGACAGATACGAAATGGTGTTAAATAGTGAAGCCACAGATGTATTTAACACCATTTCGTATCTGCTGCCTACTGCCTCGGA	Pool_11
11232	POLG2.558	TGCTGTTGACAGTGAGCGCACGCGAAATCTTGCAAGACAATAGTGAAGCCACAGATGTATTGTCTTGCAAGATTTCGCGTATGCCTACTGCCTCGGA	Pool_11
11232	POLG2.1467	TGCTGTTGACAGTGAGCGAAAGCAGAGACACCACAATGAATAGTGAAGCCACAGATGTATTCATTGTGGTGTCTCTGCTTCTGCCTACTGCCTCGGA	Pool_11
11232	POLG2.806	TGCTGTTGACAGTGAGCGAAAGCTTCGTTAGTATGGTTTATAGTGAAGCCACAGATGTATAAACCATACTAACGAAGCTTCTGCCTACTGCCTCGGA	Pool_11
11232	POLG2.559	TGCTGTTGACAGTGAGCGCCGCGAAATCTTGCAAGACAAATAGTGAAGCCACAGATGTATTTGTCTTGCAAGATTTCGCGTTGCCTACTGCCTCGGA	Pool_11
11232	POLG2.770	TGCTGTTGACAGTGAGCGCTACGAAATGGTGTTAAAAGTATAGTGAAGCCACAGATGTATACTTTTAACACCATTTCGTATTGCCTACTGCCTCGGA	Pool_11
23198	PSME4.1418	TGCTGTTGACAGTGAGCGCCAGCTACTTTAAGTTGTGTAATAGTGAAGCCACAGATGTATTACACAACTTAAAGTAGCTGTTGCCTACTGCCTCGGA	Pool_11
23198	PSME4.5089	TGCTGTTGACAGTGAGCGCAACAATGAAGATGCAGTTAAATAGTGAAGCCACAGATGTATTTAACTGCATCTTCATTGTTTTGCCTACTGCCTCGGA	Pool_11
23198	PSME4.1808	TGCTGTTGACAGTGAGCGCTAGGTCTGTCTTCTACGTTTATAGTGAAGCCACAGATGTATAAACGTAGAAGACAGACCTAATGCCTACTGCCTCGGA	Pool_11
23198	PSME4.2805	TGCTGTTGACAGTGAGCGCAAGCTTCAACTTAGTAAAGAATAGTGAAGCCACAGATGTATTCTTTACTAAGTTGAAGCTTTTGCCTACTGCCTCGGA	Pool_11
23198	PSME4.4180	TGCTGTTGACAGTGAGCGAACCCAGCGATGTGTTGCAGAATAGTGAAGCCACAGATGTATTCTGCAACACATCGCTGGGTGTGCCTACTGCCTCGGA	Pool_11
23198	PSME4.2146	TGCTGTTGACAGTGAGCGACAGCTTGTAAAGATTCTCCAATAGTGAAGCCACAGATGTATTGGAGAATCTTTACAAGCTGCTGCCTACTGCCTCGGA	Pool_11
7311	UBA52.466	TGCTGTTGACAGTGAGCGCCCCAAGAAGAAGGTCAAATAATAGTGAAGCCACAGATGTATTATTTGACCTTCTTCTTGGGATGCCTACTGCCTCGGA	Pool_11
7311	UBA52.258	TGCTGTTGACAGTGAGCGACCGCACTCTCTCAGACTACAATAGTGAAGCCACAGATGTATTGTAGTCTGAGAGAGTGCGGCTGCCTACTGCCTCGGA	Pool_11
7311	UBA52.465	TGCTGTTGACAGTGAGCGATCCCAAGAAGAAGGTCAAATATAGTGAAGCCACAGATGTATATTTGACCTTCTTCTTGGGACTGCCTACTGCCTCGGA	Pool_11
7311	UBA52.1731	TGCTGTTGACAGTGAGCGACACAGACCAATTCCTGTTTTATAGTGAAGCCACAGATGTATAAAACAGGAATTGGTCTGTGCTGCCTACTGCCTCGGA	Pool_11
7311	UBA52.913	TGCTGTTGACAGTGAGCGAAACGTTGATTCTCAAATTTTTTAGTGAAGCCACAGATGTAAAAAATTTGAGAATCAACGTTCTGCCTACTGCCTCGGA	Pool_11
7311	UBA52.1461	TGCTGTTGACAGTGAGCGATCCTATGATAATCACTCTTAATAGTGAAGCCACAGATGTATTAAGAGTGATTATCATAGGAGTGCCTACTGCCTCGGA	Pool_11
7518	XRCC4.374	TGCTGTTGACAGTGAGCGACAGCTGATGTATACACGTTTATAGTGAAGCCACAGATGTATAAACGTGTATACATCAGCTGGTGCCTACTGCCTCGGA	Pool_11
7518	XRCC4.1000	TGCTGTTGACAGTGAGCGCCAGGAGAATCAGCTTCAAGAATAGTGAAGCCACAGATGTATTCTTGAAGCTGATTCTCCTGATGCCTACTGCCTCGGA	Pool_11
7518	XRCC4.669	TGCTGTTGACAGTGAGCGCGCGGTTTATTCTGGTGTTGAATAGTGAAGCCACAGATGTATTCAACACCAGAATAAACCGCTTGCCTACTGCCTCGGA	Pool_11
7518	XRCC4.598	TGCTGTTGACAGTGAGCGCTGGAATGATGTTCAAGGACGATAGTGAAGCCACAGATGTATCGTCCTTGAACATCATTCCAATGCCTACTGCCTCGGA	Pool_11
7518	XRCC4.490	TGCTGTTGACAGTGAGCGACCAGCTGAAGTCATTAGAGAATAGTGAAGCCACAGATGTATTCTCTAATGACTTCAGCTGGGTGCCTACTGCCTCGGA	Pool_11
7518	XRCC4.562	TGCTGTTGACAGTGAGCGACACCTGCAGAAAGAAAATGAATAGTGAAGCCACAGATGTATTCATTTTCTTTCTGCAGGTGCTGCCTACTGCCTCGGA	Pool_11
86	ACTL6A.234	TGCTGTTGACAGTGAGCGACACCTACTACATAGATACTAATAGTGAAGCCACAGATGTATTAGTATCTATGTAGTAGGTGGTGCCTACTGCCTCGGA	Pool_11
86	ACTL6A.1297	TGCTGTTGACAGTGAGCGAAAGCAGTGTGTAGAAAGAAAATAGTGAAGCCACAGATGTATTTTCTTTCTACACACTGCTTCTGCCTACTGCCTCGGA	Pool_11
86	ACTL6A.351	TGCTGTTGACAGTGAGCGCTACCTACAAAATGCATGTCAATAGTGAAGCCACAGATGTATTGACATGCATTTTGTAGGTATTGCCTACTGCCTCGGA	Pool_11
86	ACTL6A.1680	TGCTGTTGACAGTGAGCGCTAGGCTTACAGAATTAAATAATAGTGAAGCCACAGATGTATTATTTAATTCTGTAAGCCTAATGCCTACTGCCTCGGA	Pool_11
86	ACTL6A.1061	TGCTGTTGACAGTGAGCGACAGGTCTCTATGGCAGTGTAATAGTGAAGCCACAGATGTATTACACTGCCATAGAGACCTGGTGCCTACTGCCTCGGA	Pool_11
86	ACTL6A.447	TGCTGTTGACAGTGAGCGAAGAGTTAATGTTTGAACACTATAGTGAAGCCACAGATGTATAGTGTTCAAACATTAACTCTGTGCCTACTGCCTCGGA	Pool_11
28990	ASTE1.2426	TGCTGTTGACAGTGAGCGCTGGGTTGTTAATGGTTGAAAATAGTGAAGCCACAGATGTATTTTCAACCATTAACAACCCAATGCCTACTGCCTCGGA	Pool_11
28990	ASTE1.553	TGCTGTTGACAGTGAGCGAACCGTCTTTGCTTCAGTTCAATAGTGAAGCCACAGATGTATTGAACTGAAGCAAAGACGGTGTGCCTACTGCCTCGGA	Pool_11
28990	ASTE1.2308	TGCTGTTGACAGTGAGCGACAAAAGGTAGATCAAATTCAATAGTGAAGCCACAGATGTATTGAATTTGATCTACCTTTTGGTGCCTACTGCCTCGGA	Pool_11
28990	ASTE1.1247	TGCTGTTGACAGTGAGCGCCCCTACCGAAGCACTAGATAATAGTGAAGCCACAGATGTATTATCTAGTGCTTCGGTAGGGTTGCCTACTGCCTCGGA	Pool_11
28990	ASTE1.2244	TGCTGTTGACAGTGAGCGCAAGCAACTTTATGAATATCTATAGTGAAGCCACAGATGTATAGATATTCATAAAGTTGCTTATGCCTACTGCCTCGGA	Pool_11
28990	ASTE1.1635	TGCTGTTGACAGTGAGCGCCAGCCTCTAGCTTTCAGTGAATAGTGAAGCCACAGATGTATTCACTGAAAGCTAGAGGCTGATGCCTACTGCCTCGGA	Pool_11
580	BARD1.548	TGCTGTTGACAGTGAGCGCAACAAGAAGAATTCAATTAAATAGTGAAGCCACAGATGTATTTAATTGAATTCTTCTTGTTTTGCCTACTGCCTCGGA	Pool_11
580	BARD1.1691	TGCTGTTGACAGTGAGCGATCCAGAAATGCTGTTAATATATAGTGAAGCCACAGATGTATATATTAACAGCATTTCTGGAGTGCCTACTGCCTCGGA	Pool_11
580	BARD1.543	TGCTGTTGACAGTGAGCGACAGGAAACAAGAAGAATTCAATAGTGAAGCCACAGATGTATTGAATTCTTCTTGTTTCCTGCTGCCTACTGCCTCGGA	Pool_11
580	BARD1.583	TGCTGTTGACAGTGAGCGATCGAAGTAAGAAAGTCAGATATAGTGAAGCCACAGATGTATATCTGACTTTCTTACTTCGAGTGCCTACTGCCTCGGA	Pool_11
580	BARD1.1648	TGCTGTTGACAGTGAGCGCTGGGCATGTGGATATAGTCAATAGTGAAGCCACAGATGTATTGACTATATCCACATGCCCATTGCCTACTGCCTCGGA	Pool_11
580	BARD1.497	TGCTGTTGACAGTGAGCGATCAGATTTGAAAGAAGATAAATAGTGAAGCCACAGATGTATTTATCTTCTTTCAAATCTGACTGCCTACTGCCTCGGA	Pool_11
672	BRCA1.663	TGCTGTTGACAGTGAGCGAACGGATGTAACAAATACTGAATAGTGAAGCCACAGATGTATTCAGTATTTGTTACATCCGTCTGCCTACTGCCTCGGA	Pool_11
672	BRCA1.2561	TGCTGTTGACAGTGAGCGCTAGCTGGTTTCCCTAAGTTTATAGTGAAGCCACAGATGTATAAACTTAGGGAAACCAGCTATTGCCTACTGCCTCGGA	Pool_11
672	BRCA1.1108	TGCTGTTGACAGTGAGCGACAGATAGTTCTACCAGTAAAATAGTGAAGCCACAGATGTATTTTACTGGTAGAACTATCTGCTGCCTACTGCCTCGGA	Pool_11
672	BRCA1.41	TGCTGTTGACAGTGAGCGCTCGCGTTGAAGAAGTACAAAATAGTGAAGCCACAGATGTATTTTGTACTTCTTCAACGCGAATGCCTACTGCCTCGGA	Pool_11
672	BRCA1.190	TGCTGTTGACAGTGAGCGATACAAGAAAGTACGAGATTTATAGTGAAGCCACAGATGTATAAATCTCGTACTTTCTTGTAGTGCCTACTGCCTCGGA	Pool_11
672	BRCA1.891	TGCTGTTGACAGTGAGCGACAGGAAATGGCTGAACTAGAATAGTGAAGCCACAGATGTATTCTAGTTCAGCCATTTCCTGCTGCCTACTGCCTCGGA	Pool_11
675	BRCA2.2554	TGCTGTTGACAGTGAGCGAAAGGATGTTCTGTCAAACCTATAGTGAAGCCACAGATGTATAGGTTTGACAGAACATCCTTGTGCCTACTGCCTCGGA	Pool_11
675	BRCA2.10453	TGCTGTTGACAGTGAGCGACAGGACACAATTACAACTAAATAGTGAAGCCACAGATGTATTTAGTTGTAATTGTGTCCTGCTGCCTACTGCCTCGGA	Pool_11
675	BRCA2.2278	TGCTGTTGACAGTGAGCGCCAGGATCTTGATTATAAAGAATAGTGAAGCCACAGATGTATTCTTTATAATCAAGATCCTGATGCCTACTGCCTCGGA	Pool_11
675	BRCA2.9508	TGCTGTTGACAGTGAGCGATCAGACGAATGTTACAATTTATAGTGAAGCCACAGATGTATAAATTGTAACATTCGTCTGACTGCCTACTGCCTCGGA	Pool_11
675	BRCA2.5242	TGCTGTTGACAGTGAGCGCTACACAAGTTGTAGTAGAAAATAGTGAAGCCACAGATGTATTTTCTACTACAACTTGTGTAATGCCTACTGCCTCGGA	Pool_11
675	BRCA2.9024	TGCTGTTGACAGTGAGCGCCAGGCAAATGTTGAATGATAATAGTGAAGCCACAGATGTATTATCATTCAACATTTGCCTGTTGCCTACTGCCTCGGA	Pool_11
900	CCNG1.571	TGCTGTTGACAGTGAGCGAAAGGTGTGTTGGAAAGTCAAATAGTGAAGCCACAGATGTATTTGACTTTCCAACACACCTTCTGCCTACTGCCTCGGA	Pool_11
900	CCNG1.782	TGCTGTTGACAGTGAGCGACACAGAAGTGTGTAGAGTTAATAGTGAAGCCACAGATGTATTAACTCTACACACTTCTGTGCTGCCTACTGCCTCGGA	Pool_11
900	CCNG1.2340	TGCTGTTGACAGTGAGCGCAGGGATATACCTTTCAATAAATAGTGAAGCCACAGATGTATTTATTGAAAGGTATATCCCTTTGCCTACTGCCTCGGA	Pool_11
900	CCNG1.1345	TGCTGTTGACAGTGAGCGCTAGGTGGTATTGAAAATGCTATAGTGAAGCCACAGATGTATAGCATTTTCAATACCACCTAATGCCTACTGCCTCGGA	Pool_11
900	CCNG1.1247	TGCTGTTGACAGTGAGCGCAAGCCTAAATGTGAAATGCTATAGTGAAGCCACAGATGTATAGCATTTCACATTTAGGCTTTTGCCTACTGCCTCGGA	Pool_11
900	CCNG1.209	TGCTGTTGACAGTGAGCGAAGGAGTCTAGATGTCAGCCAATAGTGAAGCCACAGATGTATTGGCTGACATCTAGACTCCTGTGCCTACTGCCTCGGA	Pool_11
960	CD44.497	TGCTGTTGACAGTGAGCGACGCAGATCGATTTGAATATAATAGTGAAGCCACAGATGTATTATATTCAAATCGATCTGCGCTGCCTACTGCCTCGGA	Pool_11
960	CD44.258	TGCTGTTGACAGTGAGCGCCACTGTTTTCAACCTCGAATATAGTGAAGCCACAGATGTATATTCGAGGTTGAAAACAGTGATGCCTACTGCCTCGGA	Pool_11
960	CD44.429	TGCTGTTGACAGTGAGCGATCCGGACACCATGGACAAGTTTAGTGAAGCCACAGATGTAAACTTGTCCATGGTGTCCGGAGTGCCTACTGCCTCGGA	Pool_11
960	CD44.496	TGCTGTTGACAGTGAGCGAGCGCAGATCGATTTGAATATATAGTGAAGCCACAGATGTATATATTCAAATCGATCTGCGCCTGCCTACTGCCTCGGA	Pool_11
960	CD44.494	TGCTGTTGACAGTGAGCGATGGCGCAGATCGATTTGAATATAGTGAAGCCACAGATGTATATTCAAATCGATCTGCGCCAGTGCCTACTGCCTCGGA	Pool_11
960	CD44.246	TGCTGTTGACAGTGAGCGATCCGTCTTAGGTCACTGTTTTTAGTGAAGCCACAGATGTAAAAACAGTGACCTAAGACGGAGTGCCTACTGCCTCGGA	Pool_11
1017	CDK2.1974	TGCTGTTGACAGTGAGCGCCAGGTTATATCCAATAGTAGATAGTGAAGCCACAGATGTATCTACTATTGGATATAACCTGATGCCTACTGCCTCGGA	Pool_11
1017	CDK2.878	TGCTGTTGACAGTGAGCGACAAGATTTTAGTAAAGTTGTATAGTGAAGCCACAGATGTATACAACTTTACTAAAATCTTGCTGCCTACTGCCTCGGA	Pool_11
1017	CDK2.388	TGCTGTTGACAGTGAGCGCCCGAGAGATCTCTCTGCTTAATAGTGAAGCCACAGATGTATTAAGCAGAGAGATCTCTCGGATGCCTACTGCCTCGGA	Pool_11
1017	CDK2.387	TGCTGTTGACAGTGAGCGCTCCGAGAGATCTCTCTGCTTATAGTGAAGCCACAGATGTATAAGCAGAGAGATCTCTCGGATTGCCTACTGCCTCGGA	Pool_11
1017	CDK2.1948	TGCTGTTGACAGTGAGCGAAAGGATGAACAATTATATTTATAGTGAAGCCACAGATGTATAAATATAATTGTTCATCCTTCTGCCTACTGCCTCGGA	Pool_11
1017	CDK2.1425	TGCTGTTGACAGTGAGCGACACAATGTTTATAAAGGCCAATAGTGAAGCCACAGATGTATTGGCCTTTATAAACATTGTGGTGCCTACTGCCTCGGA	Pool_11
1026	CDKN1A.582	TGCTGTTGACAGTGAGCGCCAGTTTGTGTGTCTTAATTATTAGTGAAGCCACAGATGTAATAATTAAGACACACAAACTGATGCCTACTGCCTCGGA	Pool_11
1026	CDKN1A.1673	TGCTGTTGACAGTGAGCGAAACAAGGAGTCAGACATTTTATAGTGAAGCCACAGATGTATAAAATGTCTGACTCCTTGTTCTGCCTACTGCCTCGGA	Pool_11
1026	CDKN1A.2003	TGCTGTTGACAGTGAGCGCCAGCAGGTGCTCAATAAATGATAGTGAAGCCACAGATGTATCATTTATTGAGCACCTGCTGTTGCCTACTGCCTCGGA	Pool_11
1026	CDKN1A.581	TGCTGTTGACAGTGAGCGATCAGTTTGTGTGTCTTAATTATAGTGAAGCCACAGATGTATAATTAAGACACACAAACTGAGTGCCTACTGCCTCGGA	Pool_11
1026	CDKN1A.343	TGCTGTTGACAGTGAGCGATGGACCTGTCACTGTCTTGTATAGTGAAGCCACAGATGTATACAAGACAGTGACAGGTCCACTGCCTACTGCCTCGGA	Pool_11
1026	CDKN1A.1984	TGCTGTTGACAGTGAGCGATCCCACAATGCTGAATATACATAGTGAAGCCACAGATGTATGTATATTCAGCATTGTGGGAGTGCCTACTGCCTCGGA	Pool_11
1069	CETN2.237	TGCTGTTGACAGTGAGCGCACCCAAGAAAGAAGAAATTAATAGTGAAGCCACAGATGTATTAATTTCTTCTTTCTTGGGTTTGCCTACTGCCTCGGA	Pool_11
1069	CETN2.77	TGCTGTTGACAGTGAGCGCTGGCATCAAGTTCTCAGCGAATAGTGAAGCCACAGATGTATTCGCTGAGAACTTGATGCCATTGCCTACTGCCTCGGA	Pool_11
1069	CETN2.593	TGCTGTTGACAGTGAGCGAAAGCACATGTAACTAGATTTATAGTGAAGCCACAGATGTATAAATCTAGTTACATGTGCTTGTGCCTACTGCCTCGGA	Pool_11
1069	CETN2.379	TGCTGTTGACAGTGAGCGAAAGCTCTTTGATGATGATGAATAGTGAAGCCACAGATGTATTCATCATCATCAAAGAGCTTGTGCCTACTGCCTCGGA	Pool_11
1069	CETN2.765	TGCTGTTGACAGTGAGCGCTACCCTAATTCTCAAAAGCAATAGTGAAGCCACAGATGTATTGCTTTTGAGAATTAGGGTAATGCCTACTGCCTCGGA	Pool_11
1069	CETN2.241	TGCTGTTGACAGTGAGCGAAAGAAAGAAGAAATTAAGAAATAGTGAAGCCACAGATGTATTTCTTAATTTCTTCTTTCTTGTGCCTACTGCCTCGGA	Pool_11
1111	CHEK1.185	TGCTGTTGACAGTGAGCGAAAAGAGATCTGTATCAATAAATAGTGAAGCCACAGATGTATTTATTGATACAGATCTCTTTCTGCCTACTGCCTCGGA	Pool_11
1111	CHEK1.1224	TGCTGTTGACAGTGAGCGCTGGGCTATCAATGGAAGAAAATAGTGAAGCCACAGATGTATTTTCTTCCATTGATAGCCCAATGCCTACTGCCTCGGA	Pool_11
1111	CHEK1.671	TGCTGTTGACAGTGAGCGCCAGGAGTATTCTGACTGGAAATAGTGAAGCCACAGATGTATTTCCAGTCAGAATACTCCTGATGCCTACTGCCTCGGA	Pool_11
1111	CHEK1.162	TGCTGTTGACAGTGAGCGATAGACTGTCCAGAAAATATTATAGTGAAGCCACAGATGTATAATATTTTCTGGACAGTCTACTGCCTACTGCCTCGGA	Pool_11
1111	CHEK1.935	TGCTGTTGACAGTGAGCGCAACAGTGCTTCTAGTGAAGAATAGTGAAGCCACAGATGTATTCTTCACTAGAAGCACTGTTTTGCCTACTGCCTCGGA	Pool_11
1111	CHEK1.1242	TGCTGTTGACAGTGAGCGCAAAGTTGTATGAATCAGGTTATAGTGAAGCCACAGATGTATAACCTGATTCATACAACTTTTTGCCTACTGCCTCGGA	Pool_11
11200	CHEK2.1285	TGCTGTTGACAGTGAGCGCTAGGACTCAAGTGTCACTGAATAGTGAAGCCACAGATGTATTCAGTGACACTTGAGTCCTATTGCCTACTGCCTCGGA	Pool_11
11200	CHEK2.1384	TGCTGTTGACAGTGAGCGCCAAGAAGTTGTTGGTAGTGGATAGTGAAGCCACAGATGTATCCACTACCAACAACTTCTTGATGCCTACTGCCTCGGA	Pool_11
11200	CHEK2.1743	TGCTGTTGACAGTGAGCGCCAGTCACTGATGTACAATTAATAGTGAAGCCACAGATGTATTAATTGTACATCAGTGACTGTTGCCTACTGCCTCGGA	Pool_11
11200	CHEK2.925	TGCTGTTGACAGTGAGCGCTCCTTGCATCATCAAGATTAATAGTGAAGCCACAGATGTATTAATCTTGATGATGCAAGGATTGCCTACTGCCTCGGA	Pool_11
11200	CHEK2.1349	TGCTGTTGACAGTGAGCGATGGGCAGAAGTCTCAGAGAAATAGTGAAGCCACAGATGTATTTCTCTGAGACTTCTGCCCAGTGCCTACTGCCTCGGA	Pool_11
11200	CHEK2.1454	TGCTGTTGACAGTGAGCGCCAGGATGAAGACATGAAGAGATAGTGAAGCCACAGATGTATCTCTTCATGTCTTCATCCTGATGCCTACTGCCTCGGA	Pool_11
1396	CRIP1.130	TGCTGTTGACAGTGAGCGACAAGTGCAACAAGGAGGTGTATAGTGAAGCCACAGATGTATACACCTCCTTGTTGCACTTGGTGCCTACTGCCTCGGA	Pool_11
1396	CRIP1.329	TGCTGTTGACAGTGAGCGAGAGAGCCACACTTTCAAGTAATAGTGAAGCCACAGATGTATTACTTGAAAGTGTGGCTCTCGTGCCTACTGCCTCGGA	Pool_11
1396	CRIP1.325	TGCTGTTGACAGTGAGCGAAGCCGAGAGCCACACTTTCAATAGTGAAGCCACAGATGTATTGAAAGTGTGGCTCTCGGCTCTGCCTACTGCCTCGGA	Pool_11
1396	CRIP1.450	TGCTGTTGACAGTGAGCGCAATGCTCTCAGTAAACCTGAATAGTGAAGCCACAGATGTATTCAGGTTTACTGAGAGCATTATGCCTACTGCCTCGGA	Pool_11
1396	CRIP1.330	TGCTGTTGACAGTGAGCGAAGAGCCACACTTTCAAGTAAATAGTGAAGCCACAGATGTATTTACTTGAAAGTGTGGCTCTCTGCCTACTGCCTCGGA	Pool_11
1396	CRIP1.20	TGCTGTTGACAGTGAGCGACGGCTTGAACTCGCCTAAAGATAGTGAAGCCACAGATGTATCTTTAGGCGAGTTCAAGCCGCTGCCTACTGCCTCGGA	Pool_11
64858	DCLRE1B.2281	TGCTGTTGACAGTGAGCGACAGGTTATTGCTGTTGCTGTTTAGTGAAGCCACAGATGTAAACAGCAACAGCAATAACCTGGTGCCTACTGCCTCGGA	Pool_11
64858	DCLRE1B.1898	TGCTGTTGACAGTGAGCGCCAGGAGAGTACAGAATGACAATAGTGAAGCCACAGATGTATTGTCATTCTGTACTCTCCTGTTGCCTACTGCCTCGGA	Pool_11
64858	DCLRE1B.3640	TGCTGTTGACAGTGAGCGCCACTTATTAGATATTGTTCAATAGTGAAGCCACAGATGTATTGAACAATATCTAATAAGTGATGCCTACTGCCTCGGA	Pool_11
64858	DCLRE1B.1499	TGCTGTTGACAGTGAGCGACCAGATCTCTATAGCAAAGAATAGTGAAGCCACAGATGTATTCTTTGCTATAGAGATCTGGGTGCCTACTGCCTCGGA	Pool_11
64858	DCLRE1B.1252	TGCTGTTGACAGTGAGCGCTCCGGACTCTGTACAGCAATATAGTGAAGCCACAGATGTATATTGCTGTACAGAGTCCGGAATGCCTACTGCCTCGGA	Pool_11
64858	DCLRE1B.1581	TGCTGTTGACAGTGAGCGATGGGATTTTCAGTGCACTTAATAGTGAAGCCACAGATGTATTAAGTGCACTGAAAATCCCAGTGCCTACTGCCTCGGA	Pool_11
7913	DEK.2225	TGCTGTTGACAGTGAGCGACAGCTTCACGATTATGACTAATAGTGAAGCCACAGATGTATTAGTCATAATCGTGAAGCTGGTGCCTACTGCCTCGGA	Pool_11
7913	DEK.405	TGCTGTTGACAGTGAGCGCACCGATGAACTTAGAAATCTATAGTGAAGCCACAGATGTATAGATTTCTAAGTTCATCGGTTTGCCTACTGCCTCGGA	Pool_11
7913	DEK.448	TGCTGTTGACAGTGAGCGACAGGCACTGTGTCCTCATTAATAGTGAAGCCACAGATGTATTAATGAGGACACAGTGCCTGGTGCCTACTGCCTCGGA	Pool_11
7913	DEK.508	TGCTGTTGACAGTGAGCGCAAGGAAGTGTCCAATATAAAATAGTGAAGCCACAGATGTATTTTATATTGGACACTTCCTTTTGCCTACTGCCTCGGA	Pool_11
7913	DEK.829	TGCTGTTGACAGTGAGCGCCAGATGATGAAGATAAAGAAATAGTGAAGCCACAGATGTATTTCTTTATCTTCATCATCTGATGCCTACTGCCTCGGA	Pool_11
7913	DEK.1060	TGCTGTTGACAGTGAGCGCCAGATGAAGAGTTAAAGGAAATAGTGAAGCCACAGATGTATTTCCTTTAACTCTTCATCTGTTGCCTACTGCCTCGGA	Pool_11
51514	DTL.4328	TGCTGTTGACAGTGAGCGCAAGGTCAACTGTAATGAGATATAGTGAAGCCACAGATGTATATCTCATTACAGTTGACCTTTTGCCTACTGCCTCGGA	Pool_11
51514	DTL.533	TGCTGTTGACAGTGAGCGAAAGGCTTTGTTCGATTGTATATAGTGAAGCCACAGATGTATATACAATCGAACAAAGCCTTCTGCCTACTGCCTCGGA	Pool_11
51514	DTL.2710	TGCTGTTGACAGTGAGCGAGAGGATGAATGCTGTGTTTAATAGTGAAGCCACAGATGTATTAAACACAGCATTCATCCTCGTGCCTACTGCCTCGGA	Pool_11
51514	DTL.534	TGCTGTTGACAGTGAGCGCAGGCTTTGTTCGATTGTATAATAGTGAAGCCACAGATGTATTATACAATCGAACAAAGCCTTTGCCTACTGCCTCGGA	Pool_11
51514	DTL.306	TGCTGTTGACAGTGAGCGATCCGACCCTGATGCTCTTCAATAGTGAAGCCACAGATGTATTGAAGAGCATCAGGGTCGGAGTGCCTACTGCCTCGGA	Pool_11
51514	DTL.3143	TGCTGTTGACAGTGAGCGCTCGGAGAAACTAGGAGAACAATAGTGAAGCCACAGATGTATTGTTCTCCTAGTTTCTCCGAATGCCTACTGCCTCGGA	Pool_11
1969	EPHA2.1952	TGCTGTTGACAGTGAGCGAAGGCTGTGTTGAAGTTCACTATAGTGAAGCCACAGATGTATAGTGAACTTCAACACAGCCTGTGCCTACTGCCTCGGA	Pool_11
1969	EPHA2.501	TGCTGTTGACAGTGAGCGACAAGGAGACTTTCAACCTCTATAGTGAAGCCACAGATGTATAGAGGTTGAAAGTCTCCTTGCTGCCTACTGCCTCGGA	Pool_11
1969	EPHA2.1949	TGCTGTTGACAGTGAGCGCACCAGGCTGTGTTGAAGTTCATAGTGAAGCCACAGATGTATGAACTTCAACACAGCCTGGTTTGCCTACTGCCTCGGA	Pool_11
1969	EPHA2.734	TGCTGTTGACAGTGAGCGCCCGTCCGTGTCTACTACAAGATAGTGAAGCCACAGATGTATCTTGTAGTAGACACGGACGGATGCCTACTGCCTCGGA	Pool_11
1969	EPHA2.2977	TGCTGTTGACAGTGAGCGAAACGACGACATCAAGAGGATTTAGTGAAGCCACAGATGTAAATCCTCTTGATGTCGTCGTTGTGCCTACTGCCTCGGA	Pool_11
1969	EPHA2.3362	TGCTGTTGACAGTGAGCGACACAGCCTTCGGACAGACATATAGTGAAGCCACAGATGTATATGTCTGTCCGAAGGCTGTGGTGCCTACTGCCTCGGA	Pool_11
9156	EXO1.3053	TGCTGTTGACAGTGAGCGCAAGAAGCTAAATAGAAGAATATAGTGAAGCCACAGATGTATATTCTTCTATTTAGCTTCTTATGCCTACTGCCTCGGA	Pool_11
9156	EXO1.584	TGCTGTTGACAGTGAGCGATAGAGAGATCTAGAAGAGAAATAGTGAAGCCACAGATGTATTTCTCTTCTAGATCTCTCTACTGCCTACTGCCTCGGA	Pool_11
9156	EXO1.1979	TGCTGTTGACAGTGAGCGCCAGATGTAGCACGTAATTCAATAGTGAAGCCACAGATGTATTGAATTACGTGCTACATCTGTTGCCTACTGCCTCGGA	Pool_11
9156	EXO1.986	TGCTGTTGACAGTGAGCGCCAGGTTGTGACTACCTGTCATTAGTGAAGCCACAGATGTAATGACAGGTAGTCACAACCTGATGCCTACTGCCTCGGA	Pool_11
9156	EXO1.577	TGCTGTTGACAGTGAGCGCAAGGAAGTAGAGAGATCTAGATAGTGAAGCCACAGATGTATCTAGATCTCTCTACTTCCTTTTGCCTACTGCCTCGGA	Pool_11
9156	EXO1.1387	TGCTGTTGACAGTGAGCGCTGGGATGACAAAACATGTCAATAGTGAAGCCACAGATGTATTGACATGTTTTGTCATCCCAATGCCTACTGCCTCGGA	Pool_11
2139	EYA2.2287	TGCTGTTGACAGTGAGCGAAAGGCAGTTCAAGCTGTTGAATAGTGAAGCCACAGATGTATTCAACAGCTTGAACTGCCTTCTGCCTACTGCCTCGGA	Pool_11
2139	EYA2.2418	TGCTGTTGACAGTGAGCGCTGGGTGCTTTGTGATGGATAATAGTGAAGCCACAGATGTATTATCCATCACAAAGCACCCATTGCCTACTGCCTCGGA	Pool_11
2139	EYA2.466	TGCTGTTGACAGTGAGCGATGGACTCTGAGTGACAGACAATAGTGAAGCCACAGATGTATTGTCTGTCACTCAGAGTCCACTGCCTACTGCCTCGGA	Pool_11
2139	EYA2.415	TGCTGTTGACAGTGAGCGCAACAGCGATTGTCTGGATAAATAGTGAAGCCACAGATGTATTTATCCAGACAATCGCTGTTTTGCCTACTGCCTCGGA	Pool_11
2139	EYA2.1195	TGCTGTTGACAGTGAGCGATGGGACTTGGATGAGACAATATAGTGAAGCCACAGATGTATATTGTCTCATCCAAGTCCCACTGCCTACTGCCTCGGA	Pool_11
2139	EYA2.1997	TGCTGTTGACAGTGAGCGCCGGAGTCTAGACTCTTCTGTATAGTGAAGCCACAGATGTATACAGAAGAGTCTAGACTCCGATGCCTACTGCCTCGGA	Pool_11
55215	FANCI.2189	TGCTGTTGACAGTGAGCGATACGAAGACCTAGATGATATATAGTGAAGCCACAGATGTATATATCATCTAGGTCTTCGTAGTGCCTACTGCCTCGGA	Pool_11
55215	FANCI.3760	TGCTGTTGACAGTGAGCGCCAGCACCTCACGAGACTTCAATAGTGAAGCCACAGATGTATTGAAGTCTCGTGAGGTGCTGATGCCTACTGCCTCGGA	Pool_11
55215	FANCI.3188	TGCTGTTGACAGTGAGCGCCAGGCCGAGAAGGTTCTAGAATAGTGAAGCCACAGATGTATTCTAGAACCTTCTCGGCCTGATGCCTACTGCCTCGGA	Pool_11
55215	FANCI.704	TGCTGTTGACAGTGAGCGAAAGATGAATCTTCAAGAAATATAGTGAAGCCACAGATGTATATTTCTTGAAGATTCATCTTGTGCCTACTGCCTCGGA	Pool_11
55215	FANCI.1280	TGCTGTTGACAGTGAGCGCAAGAAGGTTCTTGATGGAAAATAGTGAAGCCACAGATGTATTTTCCATCAAGAACCTTCTTTTGCCTACTGCCTCGGA	Pool_11
55215	FANCI.3191	TGCTGTTGACAGTGAGCGAGCCGAGAAGGTTCTAGAAGAATAGTGAAGCCACAGATGTATTCTTCTAGAACCTTCTCGGCCTGCCTACTGCCTCGGA	Pool_11
1647	GADD45A.792	TGCTGTTGACAGTGAGCGCACCAAATATGTTAAAGTTTAATAGTGAAGCCACAGATGTATTAAACTTTAACATATTTGGTTTGCCTACTGCCTCGGA	Pool_11
1647	GADD45A.791	TGCTGTTGACAGTGAGCGCAACCAAATATGTTAAAGTTTATAGTGAAGCCACAGATGTATAAACTTTAACATATTTGGTTTTGCCTACTGCCTCGGA	Pool_11
1647	GADD45A.765	TGCTGTTGACAGTGAGCGCTAGAATGGTTGAGTTACATTATAGTGAAGCCACAGATGTATAATGTAACTCAACCATTCTAATGCCTACTGCCTCGGA	Pool_11
1647	GADD45A.683	TGCTGTTGACAGTGAGCGAAAGCTGTGTTGAAACAGAAAATAGTGAAGCCACAGATGTATTTTCTGTTTCAACACAGCTTCTGCCTACTGCCTCGGA	Pool_11
1647	GADD45A.635	TGCTGTTGACAGTGAGCGACCGGAGATAGATGACTTTGCATAGTGAAGCCACAGATGTATGCAAAGTCATCTATCTCCGGGTGCCTACTGCCTCGGA	Pool_11
1647	GADD45A.874	TGCTGTTGACAGTGAGCGCAGGGTTAATCATATTTGAAAATAGTGAAGCCACAGATGTATTTTCAAATATGATTAACCCTTTGCCTACTGCCTCGGA	Pool_11
2967	GTF2H3.712	TGCTGTTGACAGTGAGCGATGGGTGTTTCTTCCCGATCAATAGTGAAGCCACAGATGTATTGATCGGGAAGAAACACCCACTGCCTACTGCCTCGGA	Pool_11
2967	GTF2H3.462	TGCTGTTGACAGTGAGCGCTAGAATGAACAAGGAAGTTAATAGTGAAGCCACAGATGTATTAACTTCCTTGTTCATTCTATTGCCTACTGCCTCGGA	Pool_11
2967	GTF2H3.827	TGCTGTTGACAGTGAGCGATCTGTTCTGTGTGTTTGTCAATAGTGAAGCCACAGATGTATTGACAAACACACAGAACAGACTGCCTACTGCCTCGGA	Pool_11
2967	GTF2H3.530	TGCTGTTGACAGTGAGCGAAAGACAGTGCGTTGCAGTATATAGTGAAGCCACAGATGTATATACTGCAACGCACTGTCTTCTGCCTACTGCCTCGGA	Pool_11
2967	GTF2H3.206	TGCTGTTGACAGTGAGCGCTAGCAAGTCACATTCAAGAAATAGTGAAGCCACAGATGTATTTCTTGAATGTGACTTGCTATTGCCTACTGCCTCGGA	Pool_11
2967	GTF2H3.730	TGCTGTTGACAGTGAGCGCCAAGATCAGAGATCTCAGTTATAGTGAAGCCACAGATGTATAACTGAGATCTCTGATCTTGATGCCTACTGCCTCGGA	Pool_11
3148	HMGB2.635	TGCTGTTGACAGTGAGCGCGAGGATGAAGATGAAGAATAATAGTGAAGCCACAGATGTATTATTCTTCATCTTCATCCTCTTGCCTACTGCCTCGGA	Pool_11
3148	HMGB2.1287	TGCTGTTGACAGTGAGCGAACGTTTCTGTTTATTAGCTAATAGTGAAGCCACAGATGTATTAGCTAATAAACAGAAACGTCTGCCTACTGCCTCGGA	Pool_11
3148	HMGB2.95	TGCTGTTGACAGTGAGCGACGGGAAGAGCACAAGAAGAAATAGTGAAGCCACAGATGTATTTCTTCTTGTGCTCTTCCCGGTGCCTACTGCCTCGGA	Pool_11
3148	HMGB2.629	TGCTGTTGACAGTGAGCGAGAGGAAGAGGATGAAGATGAATAGTGAAGCCACAGATGTATTCATCTTCATCCTCTTCCTCCTGCCTACTGCCTCGGA	Pool_11
3148	HMGB2.1267	TGCTGTTGACAGTGAGCGAAACGTTAAGTTTTGTACTTGATAGTGAAGCCACAGATGTATCAAGTACAAAACTTAACGTTCTGCCTACTGCCTCGGA	Pool_11
3148	HMGB2.94	TGCTGTTGACAGTGAGCGACCGGGAAGAGCACAAGAAGAATAGTGAAGCCACAGATGTATTCTTCTTGTGCTCTTCCCGGCTGCCTACTGCCTCGGA	Pool_11
3150	HMGN1.329	TGCTGTTGACAGTGAGCGAAAGGATAAATCTTCAGACAAATAGTGAAGCCACAGATGTATTTGTCTGAAGATTTATCCTTCTGCCTACTGCCTCGGA	Pool_11
3150	HMGN1.1060	TGCTGTTGACAGTGAGCGATACGTGCTGTTGAGTTGTGAATAGTGAAGCCACAGATGTATTCACAACTCAACAGCACGTACTGCCTACTGCCTCGGA	Pool_11
3150	HMGN1.1230	TGCTGTTGACAGTGAGCGCACGTATGTTAAGATTTGTGTATAGTGAAGCCACAGATGTATACACAAATCTTAACATACGTATGCCTACTGCCTCGGA	Pool_11
3150	HMGN1.560	TGCTGTTGACAGTGAGCGCCCAGAGGAATATTTTTATCAATAGTGAAGCCACAGATGTATTGATAAAAATATTCCTCTGGATGCCTACTGCCTCGGA	Pool_11
3150	HMGN1.607	TGCTGTTGACAGTGAGCGATAGCTCTAGAAACATTTTTAATAGTGAAGCCACAGATGTATTAAAAATGTTTCTAGAGCTACTGCCTACTGCCTCGGA	Pool_11
3150	HMGN1.846	TGCTGTTGACAGTGAGCGCTGGAGTCAGTCCTGCATTTAATAGTGAAGCCACAGATGTATTAAATGCAGGACTGACTCCATTGCCTACTGCCTCGGA	Pool_11
3162	HMOX1.633	TGCTGTTGACAGTGAGCGACACCAAGTTCAAGCAGCTCTATAGTGAAGCCACAGATGTATAGAGCTGCTTGAACTTGGTGGTGCCTACTGCCTCGGA	Pool_11
3162	HMOX1.693	TGCTGTTGACAGTGAGCGCCAGGCAGAGGGTGATAGAAGATAGTGAAGCCACAGATGTATCTTCTATCACCCTCTGCCTGATGCCTACTGCCTCGGA	Pool_11
3162	HMOX1.1451	TGCTGTTGACAGTGAGCGATTGTGTTCTGTTGTTTTTATATAGTGAAGCCACAGATGTATATAAAAACAACAGAACACAACTGCCTACTGCCTCGGA	Pool_11
3162	HMOX1.1572	TGCTGTTGACAGTGAGCGCTTGTCTGATAGTAGCTTGAAATAGTGAAGCCACAGATGTATTTCAAGCTACTATCAGACAATTGCCTACTGCCTCGGA	Pool_11
3162	HMOX1.333	TGCTGTTGACAGTGAGCGACCCTGTCTACTTCCCAGAAGATAGTGAAGCCACAGATGTATCTTCTGGGAAGTAGACAGGGGTGCCTACTGCCTCGGA	Pool_11
3162	HMOX1.1267	TGCTGTTGACAGTGAGCGACAGCTGTCTCAAACCTCCAAATAGTGAAGCCACAGATGTATTTGGAGGTTTGAGACAGCTGCTGCCTACTGCCTCGGA	Pool_11
9641	IKBKE.2198	TGCTGTTGACAGTGAGCGCAAGGTGAATTTCAGTCATTTATAGTGAAGCCACAGATGTATAAATGACTGAAATTCACCTTATGCCTACTGCCTCGGA	Pool_11
9641	IKBKE.2110	TGCTGTTGACAGTGAGCGCCAAGATGAACTTCATCTACAATAGTGAAGCCACAGATGTATTGTAGATGAAGTTCATCTTGTTGCCTACTGCCTCGGA	Pool_11
9641	IKBKE.3211	TGCTGTTGACAGTGAGCGACACCTTCAAGAAGTGGAATAATAGTGAAGCCACAGATGTATTATTCCACTTCTTGAAGGTGCTGCCTACTGCCTCGGA	Pool_11
9641	IKBKE.2111	TGCTGTTGACAGTGAGCGAAAGATGAACTTCATCTACAAATAGTGAAGCCACAGATGTATTTGTAGATGAAGTTCATCTTGTGCCTACTGCCTCGGA	Pool_11
9641	IKBKE.480	TGCTGTTGACAGTGAGCGAACAGACAGAAAGCATAACATATAGTGAAGCCACAGATGTATATGTTATGCTTTCTGTCTGTGTGCCTACTGCCTCGGA	Pool_11
9641	IKBKE.476	TGCTGTTGACAGTGAGCGATGCCACAGACAGAAAGCATAATAGTGAAGCCACAGATGTATTATGCTTTCTGTCTGTGGCACTGCCTACTGCCTCGGA	Pool_11
9768	KIAA0101.550	TGCTGTTGACAGTGAGCGCAAGTGTCTAGTTCTTGCTAAATAGTGAAGCCACAGATGTATTTAGCAAGAACTAGACACTTATGCCTACTGCCTCGGA	Pool_11
9768	KIAA0101.483	TGCTGTTGACAGTGAGCGCAAGACTAATTATGGTAACTTATAGTGAAGCCACAGATGTATAAGTTACCATAATTAGTCTTATGCCTACTGCCTCGGA	Pool_11
9768	KIAA0101.352	TGCTGTTGACAGTGAGCGCCCCTGGTATTCTAGAATGTAATAGTGAAGCCACAGATGTATTACATTCTAGAATACCAGGGTTGCCTACTGCCTCGGA	Pool_11
9768	KIAA0101.23	TGCTGTTGACAGTGAGCGACGGGAAAGAGACCAATATAAATAGTGAAGCCACAGATGTATTTATATTGGTCTCTTTCCCGCTGCCTACTGCCTCGGA	Pool_11
9768	KIAA0101.872	TGCTGTTGACAGTGAGCGCACGGTTGATAATGCCTCTACATAGTGAAGCCACAGATGTATGTAGAGGCATTATCAACCGTTTGCCTACTGCCTCGGA	Pool_11
9768	KIAA0101.502	TGCTGTTGACAGTGAGCGCTAGCTTAGTATTCAATATAATTAGTGAAGCCACAGATGTAATTATATTGAATACTAAGCTAATGCCTACTGCCTCGGA	Pool_11
4067	LYN.2593	TGCTGTTGACAGTGAGCGACAGATTTGTTTTGACAATGTATAGTGAAGCCACAGATGTATACATTGTCAAAACAAATCTGGTGCCTACTGCCTCGGA	Pool_11
4067	LYN.460	TGCTGTTGACAGTGAGCGCCCCGGACGACTTGTCTTTCAATAGTGAAGCCACAGATGTATTGAAAGACAAGTCGTCCGGGTTGCCTACTGCCTCGGA	Pool_11
4067	LYN.1428	TGCTGTTGACAGTGAGCGAAAGGTGCTAAGTTCCCTATTATAGTGAAGCCACAGATGTATAATAGGGAACTTAGCACCTTCTGCCTACTGCCTCGGA	Pool_11
4067	LYN.838	TGCTGTTGACAGTGAGCGCCAGCGACATGATTAAACATTATAGTGAAGCCACAGATGTATAATGTTTAATCATGTCGCTGATGCCTACTGCCTCGGA	Pool_11
4067	LYN.2266	TGCTGTTGACAGTGAGCGACAGGTGAAGTCAGCAGCTTAATAGTGAAGCCACAGATGTATTAAGCTGCTGACTTCACCTGCTGCCTACTGCCTCGGA	Pool_11
4067	LYN.2842	TGCTGTTGACAGTGAGCGAAAGGAACATAAGTGACTACAATAGTGAAGCCACAGATGTATTGTAGTCACTTATGTTCCTTCTGCCTACTGCCTCGGA	Pool_11
8930	MBD4.941	TGCTGTTGACAGTGAGCGCCAGGTTTTGTTCAAAGTGATATAGTGAAGCCACAGATGTATATCACTTTGAACAAAACCTGATGCCTACTGCCTCGGA	Pool_11
8930	MBD4.1549	TGCTGTTGACAGTGAGCGAAAGCTTCTCATCGCTACTATATAGTGAAGCCACAGATGTATATAGTAGCGATGAGAAGCTTCTGCCTACTGCCTCGGA	Pool_11
8930	MBD4.445	TGCTGTTGACAGTGAGCGCTGGGAAAGAGTTGTGAAGCAATAGTGAAGCCACAGATGTATTGCTTCACAACTCTTTCCCATTGCCTACTGCCTCGGA	Pool_11
8930	MBD4.985	TGCTGTTGACAGTGAGCGCAAAGCAGATGCTGAAAGTGAATAGTGAAGCCACAGATGTATTCACTTTCAGCATCTGCTTTATGCCTACTGCCTCGGA	Pool_11
8930	MBD4.1391	TGCTGTTGACAGTGAGCGACACGAACACAGATAGAAAGAATAGTGAAGCCACAGATGTATTCTTTCTATCTGTGTTCGTGGTGCCTACTGCCTCGGA	Pool_11
8930	MBD4.1432	TGCTGTTGACAGTGAGCGCTCCAGCAAATATAACAAAGAATAGTGAAGCCACAGATGTATTCTTTGTTATATTTGCTGGAATGCCTACTGCCTCGGA	Pool_11
100507436	MICA.982	TGCTGTTGACAGTGAGCGATCCGTTGTTGTAAGAAGAAAATAGTGAAGCCACAGATGTATTTTCTTCTTACAACAACGGACTGCCTACTGCCTCGGA	Pool_11
100507436	MICA.605	TGCTGTTGACAGTGAGCGACAGGAACTACGGCGATATCTATAGTGAAGCCACAGATGTATAGATATCGCCGTAGTTCCTGCTGCCTACTGCCTCGGA	Pool_11
100507436	MICA.1228	TGCTGTTGACAGTGAGCGAAGGCTGCAAAATGTTAGTAGATAGTGAAGCCACAGATGTATCTACTAACATTTTGCAGCCTCTGCCTACTGCCTCGGA	Pool_11
100507436	MICA.1205	TGCTGTTGACAGTGAGCGCAAGCACTTATTTATTGTTGTTTAGTGAAGCCACAGATGTAAACAACAATAAATAAGTGCTTTTGCCTACTGCCTCGGA	Pool_11
100507436	MICA.535	TGCTGTTGACAGTGAGCGCCAGGAATTTCTTGAAGGAAGATAGTGAAGCCACAGATGTATCTTCCTTCAAGAAATTCCTGATGCCTACTGCCTCGGA	Pool_11
100507436	MICA.567	TGCTGTTGACAGTGAGCGCCCAAGACACACTATCACGCTATAGTGAAGCCACAGATGTATAGCGTGATAGTGTGTCTTGGTTGCCTACTGCCTCGGA	Pool_11
4487	MSX1.1658	TGCTGTTGACAGTGAGCGCTAAGACAAGTTCAACAACAAATAGTGAAGCCACAGATGTATTTGTTGTTGAACTTGTCTTAATGCCTACTGCCTCGGA	Pool_11
4487	MSX1.1705	TGCTGTTGACAGTGAGCGCCACAGATGTGTTGCAAAGGTATAGTGAAGCCACAGATGTATACCTTTGCAACACATCTGTGTTGCCTACTGCCTCGGA	Pool_11
4487	MSX1.1659	TGCTGTTGACAGTGAGCGCAAGACAAGTTCAACAACAAAATAGTGAAGCCACAGATGTATTTTGTTGTTGAACTTGTCTTATGCCTACTGCCTCGGA	Pool_11
4487	MSX1.1841	TGCTGTTGACAGTGAGCGCAGGGATTGTGTGTACTATGTATAGTGAAGCCACAGATGTATACATAGTACACACAATCCCTTTGCCTACTGCCTCGGA	Pool_11
4487	MSX1.1842	TGCTGTTGACAGTGAGCGCGGGATTGTGTGTACTATGTAATAGTGAAGCCACAGATGTATTACATAGTACACACAATCCCTTGCCTACTGCCTCGGA	Pool_11
4487	MSX1.1429	TGCTGTTGACAGTGAGCGACCCAGCAGAATTGACAGTTGATAGTGAAGCCACAGATGTATCAACTGTCAATTCTGCTGGGGTGCCTACTGCCTCGGA	Pool_11
4595	MUTYH.233	TGCTGTTGACAGTGAGCGCAAGCTGGTACGACCAAGAGAATAGTGAAGCCACAGATGTATTCTCTTGGTCGTACCAGCTTATGCCTACTGCCTCGGA	Pool_11
4595	MUTYH.356	TGCTGTTGACAGTGAGCGCTGCCACTGTGATCAACTACTATAGTGAAGCCACAGATGTATAGTAGTTGATCACAGTGGCAATGCCTACTGCCTCGGA	Pool_11
4595	MUTYH.1605	TGCTGTTGACAGTGAGCGCGAGAATCCTGTTGTTAGTAAATAGTGAAGCCACAGATGTATTTACTAACAACAGGATTCTCATGCCTACTGCCTCGGA	Pool_11
4595	MUTYH.1277	TGCTGTTGACAGTGAGCGCCAAGCTGACATATCAAGTATATAGTGAAGCCACAGATGTATATACTTGATATGTCAGCTTGATGCCTACTGCCTCGGA	Pool_11
4595	MUTYH.1272	TGCTGTTGACAGTGAGCGCCACATCAAGCTGACATATCAATAGTGAAGCCACAGATGTATTGATATGTCAGCTTGATGTGATGCCTACTGCCTCGGA	Pool_11
4595	MUTYH.358	TGCTGTTGACAGTGAGCGACCACTGTGATCAACTACTATATAGTGAAGCCACAGATGTATATAGTAGTTGATCACAGTGGCTGCCTACTGCCTCGGA	Pool_11
4521	NUDT1.597	TGCTGTTGACAGTGAGCGCCTGGATGGAAGGGAAAATAAATAGTGAAGCCACAGATGTATTTATTTTCCCTTCCATCCAGTTGCCTACTGCCTCGGA	Pool_11
4521	NUDT1.605	TGCTGTTGACAGTGAGCGAAAGGGAAAATAAAGCTATCTATAGTGAAGCCACAGATGTATAGATAGCTTTATTTTCCCTTCTGCCTACTGCCTCGGA	Pool_11
4521	NUDT1.576	TGCTGTTGACAGTGAGCGACCGGGTTTCATCTGGAATTAATAGTGAAGCCACAGATGTATTAATTCCAGATGAAACCCGGCTGCCTACTGCCTCGGA	Pool_11
4521	NUDT1.388	TGCTGTTGACAGTGAGCGCTCCACTCCTGCTTCAGAAGAATAGTGAAGCCACAGATGTATTCTTCTGAAGCAGGAGTGGAATGCCTACTGCCTCGGA	Pool_11
4521	NUDT1.390	TGCTGTTGACAGTGAGCGACACTCCTGCTTCAGAAGAAGATAGTGAAGCCACAGATGTATCTTCTTCTGAAGCAGGAGTGGTGCCTACTGCCTCGGA	Pool_11
4521	NUDT1.415	TGCTGTTGACAGTGAGCGCCCACGGGTACTTCAAGTTCCATAGTGAAGCCACAGATGTATGGAACTTGAAGTACCCGTGGATGCCTACTGCCTCGGA	Pool_11
10039	PARP3.964	TGCTGTTGACAGTGAGCGCCAGCAAGGAGATGTTCAAGAATAGTGAAGCCACAGATGTATTCTTGAACATCTCCTTGCTGATGCCTACTGCCTCGGA	Pool_11
10039	PARP3.937	TGCTGTTGACAGTGAGCGACACGCAGAAGCTCATCACTAATAGTGAAGCCACAGATGTATTAGTGATGAGCTTCTGCGTGGTGCCTACTGCCTCGGA	Pool_11
10039	PARP3.721	TGCTGTTGACAGTGAGCGAAAGGCTAGAAGATGCAAAGAATAGTGAAGCCACAGATGTATTCTTTGCATCTTCTAGCCTTGTGCCTACTGCCTCGGA	Pool_11
10039	PARP3.2005	TGCTGTTGACAGTGAGCGCAGGCTGGACTGTGATCTTCAATAGTGAAGCCACAGATGTATTGAAGATCACAGTCCAGCCTTTGCCTACTGCCTCGGA	Pool_11
10039	PARP3.1382	TGCTGTTGACAGTGAGCGAAAGGTGATACAGACCTACTTATAGTGAAGCCACAGATGTATAAGTAGGTCTGTATCACCTTGTGCCTACTGCCTCGGA	Pool_11
10039	PARP3.886	TGCTGTTGACAGTGAGCGACCCAGTGAGGACTGTGACTAATAGTGAAGCCACAGATGTATTAGTCACAGTCCTCACTGGGCTGCCTACTGCCTCGGA	Pool_11
5111	PCNA.670	TGCTGTTGACAGTGAGCGCCAGACAAGTAATGTCGATAAATAGTGAAGCCACAGATGTATTTATCGACATTACTTGTCTGTTGCCTACTGCCTCGGA	Pool_11
5111	PCNA.442	TGCTGTTGACAGTGAGCGACAGGAGAAAGTTTCAGACTATTAGTGAAGCCACAGATGTAATAGTCTGAAACTTTCTCCTGGTGCCTACTGCCTCGGA	Pool_11
5111	PCNA.511	TGCTGTTGACAGTGAGCGCCAGGAGTACAGCTGTGTAGTATAGTGAAGCCACAGATGTATACTACACAGCTGTACTCCTGTTGCCTACTGCCTCGGA	Pool_11
5111	PCNA.441	TGCTGTTGACAGTGAGCGCCCAGGAGAAAGTTTCAGACTATAGTGAAGCCACAGATGTATAGTCTGAAACTTTCTCCTGGTTGCCTACTGCCTCGGA	Pool_11
5111	PCNA.339	TGCTGTTGACAGTGAGCGACAGTATGTCCAAAATACTAAATAGTGAAGCCACAGATGTATTTAGTATTTTGGACATACTGGTGCCTACTGCCTCGGA	Pool_11
5111	PCNA.337	TGCTGTTGACAGTGAGCGAACCAGTATGTCCAAAATACTATAGTGAAGCCACAGATGTATAGTATTTTGGACATACTGGTGTGCCTACTGCCTCGGA	Pool_11
1263	PLK3.1601	TGCTGTTGACAGTGAGCGCCAGAAAGACTGTGCACTACAATAGTGAAGCCACAGATGTATTGTAGTGCACAGTCTTTCTGTTGCCTACTGCCTCGGA	Pool_11
1263	PLK3.1157	TGCTGTTGACAGTGAGCGCTGGCAGAAAGAAGAAGAGTAATAGTGAAGCCACAGATGTATTACTCTTCTTCTTTCTGCCAATGCCTACTGCCTCGGA	Pool_11
1263	PLK3.1598	TGCTGTTGACAGTGAGCGACAACAGAAAGACTGTGCACTATAGTGAAGCCACAGATGTATAGTGCACAGTCTTTCTGTTGGTGCCTACTGCCTCGGA	Pool_11
1263	PLK3.407	TGCTGTTGACAGTGAGCGCTCAGCGCGAGAAGATCCTAAATAGTGAAGCCACAGATGTATTTAGGATCTTCTCGCGCTGATTGCCTACTGCCTCGGA	Pool_11
1263	PLK3.1160	TGCTGTTGACAGTGAGCGACAGAAAGAAGAAGAGTAAGAATAGTGAAGCCACAGATGTATTCTTACTCTTCTTCTTTCTGCTGCCTACTGCCTCGGA	Pool_11
1263	PLK3.1496	TGCTGTTGACAGTGAGCGACAAGTGGGTTGACTACTCCAATAGTGAAGCCACAGATGTATTGGAGTAGTCAACCCACTTGCTGCCTACTGCCTCGGA	Pool_11
5422	POLA1.716	TGCTGTTGACAGTGAGCGCCAGGTCGAGAGTACAGAAGAATAGTGAAGCCACAGATGTATTCTTCTGTACTCTCGACCTGTTGCCTACTGCCTCGGA	Pool_11
5422	POLA1.4244	TGCTGTTGACAGTGAGCGCACCGATCATGAGAAAGATAAATAGTGAAGCCACAGATGTATTTATCTTTCTCATGATCGGTATGCCTACTGCCTCGGA	Pool_11
5422	POLA1.1642	TGCTGTTGACAGTGAGCGCCAGCATGAAGACAATGCAGAATAGTGAAGCCACAGATGTATTCTGCATTGTCTTCATGCTGATGCCTACTGCCTCGGA	Pool_11
5422	POLA1.3328	TGCTGTTGACAGTGAGCGACCGGGACACTATAGTGGAAAATAGTGAAGCCACAGATGTATTTTCCACTATAGTGTCCCGGCTGCCTACTGCCTCGGA	Pool_11
5422	POLA1.3812	TGCTGTTGACAGTGAGCGCCAGCTCACTGATGAAGAGAAATAGTGAAGCCACAGATGTATTTCTCTTCATCAGTGAGCTGTTGCCTACTGCCTCGGA	Pool_11
5422	POLA1.1759	TGCTGTTGACAGTGAGCGAACACTTCTGTGTTGTGTCTAATAGTGAAGCCACAGATGTATTAGACACAACACAGAAGTGTGTGCCTACTGCCTCGGA	Pool_11
5425	POLD2.242	TGCTGTTGACAGTGAGCGACCGGCAGTATGCCCACATTTATAGTGAAGCCACAGATGTATAAATGTGGGCATACTGCCGGCTGCCTACTGCCTCGGA	Pool_11
5425	POLD2.536	TGCTGTTGACAGTGAGCGCAGGCACCATTGACGTGTCAAATAGTGAAGCCACAGATGTATTTGACACGTCAATGGTGCCTTTGCCTACTGCCTCGGA	Pool_11
5425	POLD2.1591	TGCTGTTGACAGTGAGCGATGAGCACTTGCTGATGCGAAATAGTGAAGCCACAGATGTATTTCGCATCAGCAAGTGCTCAGTGCCTACTGCCTCGGA	Pool_11
5425	POLD2.1235	TGCTGTTGACAGTGAGCGACCCTGACACTCTAGGTTGTTATAGTGAAGCCACAGATGTATAACAACCTAGAGTGTCAGGGGTGCCTACTGCCTCGGA	Pool_11
5425	POLD2.860	TGCTGTTGACAGTGAGCGCGAGCAGGGATTCTATCAATAATAGTGAAGCCACAGATGTATTATTGATAGAATCCCTGCTCTTGCCTACTGCCTCGGA	Pool_11
5425	POLD2.495	TGCTGTTGACAGTGAGCGAGAGCTGGTCTTGGAAGATGAATAGTGAAGCCACAGATGTATTCATCTTCCAAGACCAGCTCGTGCCTACTGCCTCGGA	Pool_11
10714	POLD3.1719	TGCTGTTGACAGTGAGCGACAGGAGAAGGATTTACTCCAATAGTGAAGCCACAGATGTATTGGAGTAAATCCTTCTCCTGGTGCCTACTGCCTCGGA	Pool_11
10714	POLD3.2158	TGCTGTTGACAGTGAGCGCCAGGCAGAACACAAATAGAAATAGTGAAGCCACAGATGTATTTCTATTTGTGTTCTGCCTGATGCCTACTGCCTCGGA	Pool_11
10714	POLD3.2162	TGCTGTTGACAGTGAGCGACAGAACACAAATAGAAATTTATAGTGAAGCCACAGATGTATAAATTTCTATTTGTGTTCTGCTGCCTACTGCCTCGGA	Pool_11
10714	POLD3.2582	TGCTGTTGACAGTGAGCGATAGGTCTAAACATCAAAGAAATAGTGAAGCCACAGATGTATTTCTTTGATGTTTAGACCTACTGCCTACTGCCTCGGA	Pool_11
10714	POLD3.798	TGCTGTTGACAGTGAGCGCAAGCTGCTATGAATAAATTTATAGTGAAGCCACAGATGTATAAATTTATTCATAGCAGCTTTTGCCTACTGCCTCGGA	Pool_11
10714	POLD3.307	TGCTGTTGACAGTGAGCGCTGCAGTAGTGAGAGAAGATAATAGTGAAGCCACAGATGTATTATCTTCTCTCACTACTGCAATGCCTACTGCCTCGGA	Pool_11
57804	POLD4.917	TGCTGTTGACAGTGAGCGCTCACTAATGCTTATCAATAAATAGTGAAGCCACAGATGTATTTATTGATAAGCATTAGTGAATGCCTACTGCCTCGGA	Pool_11
57804	POLD4.818	TGCTGTTGACAGTGAGCGCCAGTCAGACATGGACAGTTGATAGTGAAGCCACAGATGTATCAACTGTCCATGTCTGACTGTTGCCTACTGCCTCGGA	Pool_11
57804	POLD4.713	TGCTGTTGACAGTGAGCGACAGAGTGCTTCTAGATGGAGATAGTGAAGCCACAGATGTATCTCCATCTAGAAGCACTCTGCTGCCTACTGCCTCGGA	Pool_11
57804	POLD4.648	TGCTGTTGACAGTGAGCGAAGGCTCAACTCCTCCATCTAATAGTGAAGCCACAGATGTATTAGATGGAGGAGTTGAGCCTCTGCCTACTGCCTCGGA	Pool_11
57804	POLD4.647	TGCTGTTGACAGTGAGCGCGAGGCTCAACTCCTCCATCTATAGTGAAGCCACAGATGTATAGATGGAGGAGTTGAGCCTCTTGCCTACTGCCTCGGA	Pool_11
57804	POLD4.711	TGCTGTTGACAGTGAGCGCAGCAGAGTGCTTCTAGATGGATAGTGAAGCCACAGATGTATCCATCTAGAAGCACTCTGCTTTGCCTACTGCCTCGGA	Pool_11
5427	POLE2.935	TGCTGTTGACAGTGAGCGCCAGCTAGAAGAGGAGAATAAATAGTGAAGCCACAGATGTATTTATTCTCCTCTTCTAGCTGTTGCCTACTGCCTCGGA	Pool_11
5427	POLE2.1529	TGCTGTTGACAGTGAGCGACCCGATCTACTTGTCATTGCATAGTGAAGCCACAGATGTATGCAATGACAAGTAGATCGGGCTGCCTACTGCCTCGGA	Pool_11
5427	POLE2.1351	TGCTGTTGACAGTGAGCGCCCGTGAAGACTTAGTAAATAATAGTGAAGCCACAGATGTATTATTTACTAAGTCTTCACGGATGCCTACTGCCTCGGA	Pool_11
5427	POLE2.401	TGCTGTTGACAGTGAGCGCTGCAGTCAGTCTGTTGATGAATAGTGAAGCCACAGATGTATTCATCAACAGACTGACTGCATTGCCTACTGCCTCGGA	Pool_11
5427	POLE2.1018	TGCTGTTGACAGTGAGCGCTCGCATAATGTTTGCTGGTTATAGTGAAGCCACAGATGTATAACCAGCAAACATTATGCGAATGCCTACTGCCTCGGA	Pool_11
5427	POLE2.583	TGCTGTTGACAGTGAGCGACGGAAGCAAATTCCAGCTTAATAGTGAAGCCACAGATGTATTAAGCTGGAATTTGCTTCCGCTGCCTACTGCCTCGGA	Pool_11
27434	POLM.2126	TGCTGTTGACAGTGAGCGATGGGAGGAAGATAATTTTCAATAGTGAAGCCACAGATGTATTGAAAATTATCTTCCTCCCAGTGCCTACTGCCTCGGA	Pool_11
27434	POLM.2129	TGCTGTTGACAGTGAGCGAGAGGAAGATAATTTTCAACTATAGTGAAGCCACAGATGTATAGTTGAAAATTATCTTCCTCCTGCCTACTGCCTCGGA	Pool_11
27434	POLM.2577	TGCTGTTGACAGTGAGCGACAGACCACTCATCACATTAAATAGTGAAGCCACAGATGTATTTAATGTGATGAGTGGTCTGGTGCCTACTGCCTCGGA	Pool_11
27434	POLM.2119	TGCTGTTGACAGTGAGCGATAGGAGCTGGGAGGAAGATAATAGTGAAGCCACAGATGTATTATCTTCCTCCCAGCTCCTACTGCCTACTGCCTCGGA	Pool_11
27434	POLM.2576	TGCTGTTGACAGTGAGCGACCAGACCACTCATCACATTAATAGTGAAGCCACAGATGTATTAATGTGATGAGTGGTCTGGGTGCCTACTGCCTCGGA	Pool_11
27434	POLM.288	TGCTGTTGACAGTGAGCGCAGCGACACATGTTGTGATGGATAGTGAAGCCACAGATGTATCCATCACAACATGTGTCGCTTTGCCTACTGCCTCGGA	Pool_11
10721	POLQ.7671	TGCTGTTGACAGTGAGCGCCAGGATTGTCACGAAAGAGAATAGTGAAGCCACAGATGTATTCTCTTTCGTGACAATCCTGTTGCCTACTGCCTCGGA	Pool_11
10721	POLQ.1097	TGCTGTTGACAGTGAGCGCGAGGACCATGTTGTTAGTTTATAGTGAAGCCACAGATGTATAAACTAACAACATGGTCCTCATGCCTACTGCCTCGGA	Pool_11
10721	POLQ.4470	TGCTGTTGACAGTGAGCGAAAGGTTATCAAACACAAGAAATAGTGAAGCCACAGATGTATTTCTTGTGTTTGATAACCTTGTGCCTACTGCCTCGGA	Pool_11
10721	POLQ.4307	TGCTGTTGACAGTGAGCGCAAGACTGTAGGTACTATGAAATAGTGAAGCCACAGATGTATTTCATAGTACCTACAGTCTTATGCCTACTGCCTCGGA	Pool_11
10721	POLQ.6648	TGCTGTTGACAGTGAGCGATGGGAAGACAGTTCAGCACTATAGTGAAGCCACAGATGTATAGTGCTGAACTGTCTTCCCAGTGCCTACTGCCTCGGA	Pool_11
10721	POLQ.5556	TGCTGTTGACAGTGAGCGCCACAGGATGGATTACAGTTAATAGTGAAGCCACAGATGTATTAACTGTAATCCATCCTGTGATGCCTACTGCCTCGGA	Pool_11
5436	POLR2G.482	TGCTGTTGACAGTGAGCGCACCCACCATGTTACAAGACAATAGTGAAGCCACAGATGTATTGTCTTGTAACATGGTGGGTTTGCCTACTGCCTCGGA	Pool_11
5436	POLR2G.795	TGCTGTTGACAGTGAGCGCTCAGTATGTGTTCTAAGTATATAGTGAAGCCACAGATGTATATACTTAGAACACATACTGAATGCCTACTGCCTCGGA	Pool_11
5436	POLR2G.796	TGCTGTTGACAGTGAGCGCCAGTATGTGTTCTAAGTATAATAGTGAAGCCACAGATGTATTATACTTAGAACACATACTGATGCCTACTGCCTCGGA	Pool_11
5436	POLR2G.526	TGCTGTTGACAGTGAGCGACAGGACGATGAGATCCGCTTATAGTGAAGCCACAGATGTATAAGCGGATCTCATCGTCCTGCTGCCTACTGCCTCGGA	Pool_11
5436	POLR2G.391	TGCTGTTGACAGTGAGCGAAAGGTTGGACTCTTCACAGAATAGTGAAGCCACAGATGTATTCTGTGAAGAGTCCAACCTTGTGCCTACTGCCTCGGA	Pool_11
5436	POLR2G.105	TGCTGTTGACAGTGAGCGATGGGAAGATGTTCTACCATATTAGTGAAGCCACAGATGTAATATGGTAGAACATCTTCCCAGTGCCTACTGCCTCGGA	Pool_11
5437	POLR2H.577	TGCTGTTGACAGTGAGCGCCAGGTCATGGGCATTGTTCAATAGTGAAGCCACAGATGTATTGAACAATGCCCATGACCTGATGCCTACTGCCTCGGA	Pool_11
5437	POLR2H.505	TGCTGTTGACAGTGAGCGACAGAGTTTATCTCCTGATGAATAGTGAAGCCACAGATGTATTCATCAGGAGATAAACTCTGGTGCCTACTGCCTCGGA	Pool_11
5437	POLR2H.193	TGCTGTTGACAGTGAGCGCCAAGATGGATCTAATCTTAGATAGTGAAGCCACAGATGTATCTAAGATTAGATCCATCTTGATGCCTACTGCCTCGGA	Pool_11
5437	POLR2H.346	TGCTGTTGACAGTGAGCGCCCAGTTTGAGTATGTAATGTATAGTGAAGCCACAGATGTATACATTACATACTCAAACTGGTTGCCTACTGCCTCGGA	Pool_11
5437	POLR2H.347	TGCTGTTGACAGTGAGCGACAGTTTGAGTATGTAATGTATTAGTGAAGCCACAGATGTAATACATTACATACTCAAACTGGTGCCTACTGCCTCGGA	Pool_11
5437	POLR2H.198	TGCTGTTGACAGTGAGCGCTGGATCTAATCTTAGATGTAATAGTGAAGCCACAGATGTATTACATCTAAGATTAGATCCATTGCCTACTGCCTCGGA	Pool_11
5439	POLR2J.585	TGCTGTTGACAGTGAGCGCTAGGTTTTATATTCCTAATAATAGTGAAGCCACAGATGTATTATTAGGAATATAAAACCTAATGCCTACTGCCTCGGA	Pool_11
5439	POLR2J.120	TGCTGTTGACAGTGAGCGACGAGAAGAAGATCACCATTAATAGTGAAGCCACAGATGTATTAATGGTGATCTTCTTCTCGCTGCCTACTGCCTCGGA	Pool_11
5439	POLR2J.916	TGCTGTTGACAGTGAGCGATCCACAGTAGAGTTTAATAAATAGTGAAGCCACAGATGTATTTATTAAACTCTACTGTGGACTGCCTACTGCCTCGGA	Pool_11
5439	POLR2J.563	TGCTGTTGACAGTGAGCGCCCGACGTGTCCTGTACATAGATAGTGAAGCCACAGATGTATCTATGTACAGGACACGTCGGTTGCCTACTGCCTCGGA	Pool_11
5439	POLR2J.162	TGCTGTTGACAGTGAGCGCTGCCTGTTTATTCACCATCAATAGTGAAGCCACAGATGTATTGATGGTGAATAAACAGGCATTGCCTACTGCCTCGGA	Pool_11
5439	POLR2J.641	TGCTGTTGACAGTGAGCGAAGCGGTGACTTCGCAAGCAAATAGTGAAGCCACAGATGTATTTGCTTGCGAAGTCACCGCTGTGCCTACTGCCTCGGA	Pool_11
5531	PPP4C.201	TGCTGTTGACAGTGAGCGACAGAGAGATCTTGGTAGAGGATAGTGAAGCCACAGATGTATCCTCTACCAAGATCTCTCTGGTGCCTACTGCCTCGGA	Pool_11
5531	PPP4C.273	TGCTGTTGACAGTGAGCGCTGGACAATTCTATGACCTCAATAGTGAAGCCACAGATGTATTGAGGTCATAGAATTGTCCATTGCCTACTGCCTCGGA	Pool_11
5531	PPP4C.819	TGCTGTTGACAGTGAGCGCCCAACTGGTGATGGAAGGTTATAGTGAAGCCACAGATGTATAACCTTCCATCACCAGTTGGTTGCCTACTGCCTCGGA	Pool_11
5531	PPP4C.834	TGCTGTTGACAGTGAGCGCAGGTTACAAGTGGCACTTCAATAGTGAAGCCACAGATGTATTGAAGTGCCACTTGTAACCTTTGCCTACTGCCTCGGA	Pool_11
5531	PPP4C.1228	TGCTGTTGACAGTGAGCGAAACCATGAAGTTTCCAATAATTAGTGAAGCCACAGATGTAATTATTGGAAACTTCATGGTTCTGCCTACTGCCTCGGA	Pool_11
5531	PPP4C.469	TGCTGTTGACAGTGAGCGACAGGTCTATGGCTTCTACGATTAGTGAAGCCACAGATGTAATCGTAGAAGCCATAGACCTGCTGCCTACTGCCTCGGA	Pool_11
5591	PRKDC.6503	TGCTGTTGACAGTGAGCGAAAGCTTGTTATTAATACAGAATAGTGAAGCCACAGATGTATTCTGTATTAATAACAAGCTTGTGCCTACTGCCTCGGA	Pool_11
5591	PRKDC.3599	TGCTGTTGACAGTGAGCGACAGACAGAATGTCGACACAAATAGTGAAGCCACAGATGTATTTGTGTCGACATTCTGTCTGGTGCCTACTGCCTCGGA	Pool_11
5591	PRKDC.11971	TGCTGTTGACAGTGAGCGCCACCATGGATGTGTTTGTCAATAGTGAAGCCACAGATGTATTGACAAACACATCCATGGTGTTGCCTACTGCCTCGGA	Pool_11
5591	PRKDC.6843	TGCTGTTGACAGTGAGCGCCCGGTAAAGATCCTAATTCTATAGTGAAGCCACAGATGTATAGAATTAGGATCTTTACCGGATGCCTACTGCCTCGGA	Pool_11
5591	PRKDC.7287	TGCTGTTGACAGTGAGCGCCAGAGCTGTACTTCCAGTTAATAGTGAAGCCACAGATGTATTAACTGGAAGTACAGCTCTGTTGCCTACTGCCTCGGA	Pool_11
5591	PRKDC.3482	TGCTGTTGACAGTGAGCGAAAGCATGTTTCTTTAAATAAATAGTGAAGCCACAGATGTATTTATTTAAAGAAACATGCTTCTGCCTACTGCCTCGGA	Pool_11
5683	PSMA2.784	TGCTGTTGACAGTGAGCGCCAGATAATCTATCTACTTAAATAGTGAAGCCACAGATGTATTTAAGTAGATAGATTATCTGATGCCTACTGCCTCGGA	Pool_11
5683	PSMA2.1236	TGCTGTTGACAGTGAGCGCAGGGTGCTCTATGAGATTGTATAGTGAAGCCACAGATGTATACAATCTCATAGAGCACCCTATGCCTACTGCCTCGGA	Pool_11
5683	PSMA2.973	TGCTGTTGACAGTGAGCGAACAGTTGATTTCTGAAGACTATAGTGAAGCCACAGATGTATAGTCTTCAGAAATCAACTGTGTGCCTACTGCCTCGGA	Pool_11
5683	PSMA2.930	TGCTGTTGACAGTGAGCGCTAGGAGTTGCTAAAATTTTAATAGTGAAGCCACAGATGTATTAAAATTTTAGCAACTCCTAATGCCTACTGCCTCGGA	Pool_11
5683	PSMA2.774	TGCTGTTGACAGTGAGCGCTCCAGAATTTCAGATAATCTATAGTGAAGCCACAGATGTATAGATTATCTGAAATTCTGGATTGCCTACTGCCTCGGA	Pool_11
5683	PSMA2.783	TGCTGTTGACAGTGAGCGCTCAGATAATCTATCTACTTAATAGTGAAGCCACAGATGTATTAAGTAGATAGATTATCTGAATGCCTACTGCCTCGGA	Pool_11
5685	PSMA4.524	TGCTGTTGACAGTGAGCGCAAGACCATGGATGTTAGTAAATAGTGAAGCCACAGATGTATTTACTAACATCCATGGTCTTATGCCTACTGCCTCGGA	Pool_11
5685	PSMA4.263	TGCTGTTGACAGTGAGCGCACAGCGCTGTGTGATATCAAATAGTGAAGCCACAGATGTATTTGATATCACACAGCGCTGTATGCCTACTGCCTCGGA	Pool_11
5685	PSMA4.266	TGCTGTTGACAGTGAGCGCGCGCTGTGTGATATCAAACAATAGTGAAGCCACAGATGTATTGTTTGATATCACACAGCGCTTGCCTACTGCCTCGGA	Pool_11
5685	PSMA4.436	TGCTGTTGACAGTGAGCGATGCAGCTGTGTCAATGTTGAATAGTGAAGCCACAGATGTATTCAACATTGACACAGCTGCAGTGCCTACTGCCTCGGA	Pool_11
5685	PSMA4.882	TGCTGTTGACAGTGAGCGCAACGATGATGGTTACCCTTCATAGTGAAGCCACAGATGTATGAAGGGTAACCATCATCGTTATGCCTACTGCCTCGGA	Pool_11
5685	PSMA4.557	TGCTGTTGACAGTGAGCGCAAAGTGGAAATTGCAACACTATAGTGAAGCCACAGATGTATAGTGTTGCAATTTCCACTTTTTGCCTACTGCCTCGGA	Pool_11
5688	PSMA7.950	TGCTGTTGACAGTGAGCGCCACACTGAGTGTCCTACAATATAGTGAAGCCACAGATGTATATTGTAGGACACTCAGTGTGATGCCTACTGCCTCGGA	Pool_11
5688	PSMA7.795	TGCTGTTGACAGTGAGCGAAAGTATGTTGCTGAAATTGAATAGTGAAGCCACAGATGTATTCAATTTCAGCAACATACTTCTGCCTACTGCCTCGGA	Pool_11
5688	PSMA7.952	TGCTGTTGACAGTGAGCGCCACTGAGTGTCCTACAATAAATAGTGAAGCCACAGATGTATTTATTGTAGGACACTCAGTGTTGCCTACTGCCTCGGA	Pool_11
5688	PSMA7.633	TGCTGTTGACAGTGAGCGAGAGAAGAACTATACTGACGAATAGTGAAGCCACAGATGTATTCGTCAGTATAGTTCTTCTCCTGCCTACTGCCTCGGA	Pool_11
5688	PSMA7.951	TGCTGTTGACAGTGAGCGAACACTGAGTGTCCTACAATAATAGTGAAGCCACAGATGTATTATTGTAGGACACTCAGTGTGTGCCTACTGCCTCGGA	Pool_11
5688	PSMA7.451	TGCTGTTGACAGTGAGCGACCAGTCTGAAGCAGCGTTATATAGTGAAGCCACAGATGTATATAACGCTGCTTCAGACTGGCTGCCTACTGCCTCGGA	Pool_11
5691	PSMB3.79	TGCTGTTGACAGTGAGCGCCATGTCTATTATGTCCTATAATAGTGAAGCCACAGATGTATTATAGGACATAATAGACATGATGCCTACTGCCTCGGA	Pool_11
5691	PSMB3.70	TGCTGTTGACAGTGAGCGCCACCGCAATCATGTCTATTATTAGTGAAGCCACAGATGTAATAATAGACATGATTGCGGTGTTGCCTACTGCCTCGGA	Pool_11
5691	PSMB3.640	TGCTGTTGACAGTGAGCGCCCACATCATCGAGAAGGACAATAGTGAAGCCACAGATGTATTGTCCTTCTCGATGATGTGGATGCCTACTGCCTCGGA	Pool_11
5691	PSMB3.187	TGCTGTTGACAGTGAGCGACACGGACTTCCAGAAGATCTTTAGTGAAGCCACAGATGTAAAGATCTTCTGGAAGTCCGTGGTGCCTACTGCCTCGGA	Pool_11
5691	PSMB3.641	TGCTGTTGACAGTGAGCGACACATCATCGAGAAGGACAAATAGTGAAGCCACAGATGTATTTGTCCTTCTCGATGATGTGGTGCCTACTGCCTCGGA	Pool_11
5691	PSMB3.76	TGCTGTTGACAGTGAGCGAAATCATGTCTATTATGTCCTATAGTGAAGCCACAGATGTATAGGACATAATAGACATGATTGTGCCTACTGCCTCGGA	Pool_11
5692	PSMB4.389	TGCTGTTGACAGTGAGCGATGGGAGATGGACACAGCTATATAGTGAAGCCACAGATGTATATAGCTGTGTCCATCTCCCAGTGCCTACTGCCTCGGA	Pool_11
5692	PSMB4.279	TGCTGTTGACAGTGAGCGATCGCATTATGCGAGTCAACAATAGTGAAGCCACAGATGTATTGTTGACTCGCATAATGCGAGTGCCTACTGCCTCGGA	Pool_11
5692	PSMB4.762	TGCTGTTGACAGTGAGCGAACCATTGTCTACAGAGACCAATAGTGAAGCCACAGATGTATTGGTCTCTGTAGACAATGGTCTGCCTACTGCCTCGGA	Pool_11
5692	PSMB4.401	TGCTGTTGACAGTGAGCGAACAGCTATAGTCCTAGAGCTATAGTGAAGCCACAGATGTATAGCTCTAGGACTATAGCTGTGTGCCTACTGCCTCGGA	Pool_11
5692	PSMB4.758	TGCTGTTGACAGTGAGCGAAGGGACCATTGTCTACAGAGATAGTGAAGCCACAGATGTATCTCTGTAGACAATGGTCCCTCTGCCTACTGCCTCGGA	Pool_11
5692	PSMB4.883	TGCTGTTGACAGTGAGCGCAAGATAGACTCTTCTTTTGTATAGTGAAGCCACAGATGTATACAAAAGAAGAGTCTATCTTTTGCCTACTGCCTCGGA	Pool_11
5696	PSMB8.264	TGCTGTTGACAGTGAGCGACAGGCTGTACTATCTGCGAAATAGTGAAGCCACAGATGTATTTCGCAGATAGTACAGCCTGCTGCCTACTGCCTCGGA	Pool_11
5696	PSMB8.897	TGCTGTTGACAGTGAGCGACCCACTAAGTAGAATAAAGAATAGTGAAGCCACAGATGTATTCTTTATTCTACTTAGTGGGGTGCCTACTGCCTCGGA	Pool_11
5696	PSMB8.585	TGCTGTTGACAGTGAGCGATGGAGGCGTTGTCAATATGTATAGTGAAGCCACAGATGTATACATATTGACAACGCCTCCAGTGCCTACTGCCTCGGA	Pool_11
5696	PSMB8.899	TGCTGTTGACAGTGAGCGACACTAAGTAGAATAAAGAAAATAGTGAAGCCACAGATGTATTTTCTTTATTCTACTTAGTGGTGCCTACTGCCTCGGA	Pool_11
5696	PSMB8.613	TGCTGTTGACAGTGAGCGAAAGGAAGATGGTTGGGTGAAATAGTGAAGCCACAGATGTATTTCACCCAACCATCTTCCTTCTGCCTACTGCCTCGGA	Pool_11
5696	PSMB8.898	TGCTGTTGACAGTGAGCGACCACTAAGTAGAATAAAGAAATAGTGAAGCCACAGATGTATTTCTTTATTCTACTTAGTGGGTGCCTACTGCCTCGGA	Pool_11
5698	PSMB9.919	TGCTGTTGACAGTGAGCGCAGGGACTAAACTAGAAATATATAGTGAAGCCACAGATGTATATATTTCTAGTTTAGTCCCTTTGCCTACTGCCTCGGA	Pool_11
5698	PSMB9.845	TGCTGTTGACAGTGAGCGCTCCCTCCTAGATGTCAGCATATAGTGAAGCCACAGATGTATATGCTGACATCTAGGAGGGAATGCCTACTGCCTCGGA	Pool_11
5698	PSMB9.520	TGCTGTTGACAGTGAGCGACAGCACCTTTATCTATGGTTATAGTGAAGCCACAGATGTATAACCATAGATAAAGGTGCTGCTGCCTACTGCCTCGGA	Pool_11
5698	PSMB9.965	TGCTGTTGACAGTGAGCGCCACGTACTGAATGATTTTGAATAGTGAAGCCACAGATGTATTCAAAATCATTCAGTACGTGATGCCTACTGCCTCGGA	Pool_11
5698	PSMB9.450	TGCTGTTGACAGTGAGCGAAAGGAGGTCAGGTATATGGAATAGTGAAGCCACAGATGTATTCCATATACCTGACCTCCTTCTGCCTACTGCCTCGGA	Pool_11
5698	PSMB9.920	TGCTGTTGACAGTGAGCGCGGGACTAAACTAGAAATATAATAGTGAAGCCACAGATGTATTATATTTCTAGTTTAGTCCCTTGCCTACTGCCTCGGA	Pool_11
5704	PSMC4.852	TGCTGTTGACAGTGAGCGCCAGAATGTCAATGTCAAGGTATAGTGAAGCCACAGATGTATACCTTGACATTGACATTCTGATGCCTACTGCCTCGGA	Pool_11
5704	PSMC4.581	TGCTGTTGACAGTGAGCGATGGGAAGACCATGTTGGCAAATAGTGAAGCCACAGATGTATTTGCCAACATGGTCTTCCCACTGCCTACTGCCTCGGA	Pool_11
5704	PSMC4.989	TGCTGTTGACAGTGAGCGACACTATCACTAGCAAGATGAATAGTGAAGCCACAGATGTATTCATCTTGCTAGTGATAGTGGTGCCTACTGCCTCGGA	Pool_11
5704	PSMC4.1306	TGCTGTTGACAGTGAGCGAAGGATTGGTTTCTTCAATAAATAGTGAAGCCACAGATGTATTTATTGAAGAAACCAATCCTGTGCCTACTGCCTCGGA	Pool_11
5704	PSMC4.1154	TGCTGTTGACAGTGAGCGCAGCATACAAGACTGTCATCAATAGTGAAGCCACAGATGTATTGATGACAGTCTTGTATGCTTTGCCTACTGCCTCGGA	Pool_11
5704	PSMC4.506	TGCTGTTGACAGTGAGCGCCACGCATTTCGAGCTCTACAATAGTGAAGCCACAGATGTATTGTAGAGCTCGAAATGCGTGATGCCTACTGCCTCGGA	Pool_11
5721	PSME2.790	TGCTGTTGACAGTGAGCGACGGGACTAGAAGGAAAATAAATAGTGAAGCCACAGATGTATTTATTTTCCTTCTAGTCCCGGTGCCTACTGCCTCGGA	Pool_11
5721	PSME2.789	TGCTGTTGACAGTGAGCGACCGGGACTAGAAGGAAAATAATAGTGAAGCCACAGATGTATTATTTTCCTTCTAGTCCCGGGTGCCTACTGCCTCGGA	Pool_11
5721	PSME2.799	TGCTGTTGACAGTGAGCGAAAGGAAAATAAATGATCTATATAGTGAAGCCACAGATGTATATAGATCATTTATTTTCCTTCTGCCTACTGCCTCGGA	Pool_11
5721	PSME2.283	TGCTGTTGACAGTGAGCGCCCCAAGGATGATGAGATGGAATAGTGAAGCCACAGATGTATTCCATCTCATCATCCTTGGGTTGCCTACTGCCTCGGA	Pool_11
5721	PSME2.457	TGCTGTTGACAGTGAGCGAAAGATTGAAGATGGAAATGATTAGTGAAGCCACAGATGTAATCATTTCCATCTTCAATCTTGTGCCTACTGCCTCGGA	Pool_11
5721	PSME2.313	TGCTGTTGACAGTGAGCGACAGGAGAAGAAAGAAGTCCATTAGTGAAGCCACAGATGTAATGGACTTCTTTCTTCTCCTGCTGCCTACTGCCTCGGA	Pool_11
9232	PTTG1.670	TGCTGTTGACAGTGAGCGCCAGAGTTTGTGTGTATTTGTATAGTGAAGCCACAGATGTATACAAATACACACAAACTCTGATGCCTACTGCCTCGGA	Pool_11
9232	PTTG1.328	TGCTGTTGACAGTGAGCGATGAGAAGACTGTTAAAGCAAATAGTGAAGCCACAGATGTATTTGCTTTAACAGTCTTCTCAGTGCCTACTGCCTCGGA	Pool_11
9232	PTTG1.19	TGCTGTTGACAGTGAGCGACGGCTGTTAAGACCTGCAATATAGTGAAGCCACAGATGTATATTGCAGGTCTTAACAGCCGCTGCCTACTGCCTCGGA	Pool_11
9232	PTTG1.237	TGCTGTTGACAGTGAGCGCTGGGAACTGTCAACAGAGCTATAGTGAAGCCACAGATGTATAGCTCTGTTGACAGTTCCCAATGCCTACTGCCTCGGA	Pool_11
9232	PTTG1.366	TGCTGTTGACAGTGAGCGCCAGATGATGCCTATCCAGAAATAGTGAAGCCACAGATGTATTTCTGGATAGGCATCATCTGATGCCTACTGCCTCGGA	Pool_11
9232	PTTG1.8	TGCTGTTGACAGTGAGCGATCAGATGAATGCGGCTGTTAATAGTGAAGCCACAGATGTATTAACAGCCGCATTCATCTGAGTGCCTACTGCCTCGGA	Pool_11
5888	RAD51.1899	TGCTGTTGACAGTGAGCGCAAAGTAGTTATTAGTAGTGAATAGTGAAGCCACAGATGTATTCACTACTAATAACTACTTTATGCCTACTGCCTCGGA	Pool_11
5888	RAD51.1236	TGCTGTTGACAGTGAGCGCAACAAGCTGTCTACTGGACAATAGTGAAGCCACAGATGTATTGTCCAGTAGACAGCTTGTTATGCCTACTGCCTCGGA	Pool_11
5888	RAD51.257	TGCTGTTGACAGTGAGCGAAACGATGTGAAGAAATTGGAATAGTGAAGCCACAGATGTATTCCAATTTCTTCACATCGTTGTGCCTACTGCCTCGGA	Pool_11
5888	RAD51.1825	TGCTGTTGACAGTGAGCGCCAGAGTGAGACCATGTTTCAATAGTGAAGCCACAGATGTATTGAAACATGGTCTCACTCTGTTGCCTACTGCCTCGGA	Pool_11
5888	RAD51.438	TGCTGTTGACAGTGAGCGAACCCAGATCTGTCATACGCTATAGTGAAGCCACAGATGTATAGCGTATGACAGATCTGGGTCTGCCTACTGCCTCGGA	Pool_11
5888	RAD51.341	TGCTGTTGACAGTGAGCGCAAGGGAATTAGTGAAGCCAAATAGTGAAGCCACAGATGTATTTGGCTTCACTAATTCCCTTATGCCTACTGCCTCGGA	Pool_11
10635	RAD51AP1.281	TGCTGTTGACAGTGAGCGCAAGGAGTTAAAACAAGATAAATAGTGAAGCCACAGATGTATTTATCTTGTTTTAACTCCTTTTGCCTACTGCCTCGGA	Pool_11
10635	RAD51AP1.1713	TGCTGTTGACAGTGAGCGCTAGATGGTTATTCTCTAGAAATAGTGAAGCCACAGATGTATTTCTAGAGAATAACCATCTAATGCCTACTGCCTCGGA	Pool_11
10635	RAD51AP1.835	TGCTGTTGACAGTGAGCGACCCAGTAGAAAAGAAAGAGAATAGTGAAGCCACAGATGTATTCTCTTTCTTTTCTACTGGGGTGCCTACTGCCTCGGA	Pool_11
10635	RAD51AP1.389	TGCTGTTGACAGTGAGCGAAAGCTCTACCAGAGAGACTTATAGTGAAGCCACAGATGTATAAGTCTCTCTGGTAGAGCTTGTGCCTACTGCCTCGGA	Pool_11
10635	RAD51AP1.845	TGCTGTTGACAGTGAGCGCAAGAAAGAGAAGAAATCTAAATAGTGAAGCCACAGATGTATTTAGATTTCTTCTCTTTCTTTTGCCTACTGCCTCGGA	Pool_11
10635	RAD51AP1.999	TGCTGTTGACAGTGAGCGCCAGCTGAAAGCAAGAAACCTATAGTGAAGCCACAGATGTATAGGTTTCTTGCTTTCAGCTGATGCCTACTGCCTCGGA	Pool_11
5932	RBBP8.210	TGCTGTTGACAGTGAGCGAAAGGTTTACAAGTAAAAGTAATAGTGAAGCCACAGATGTATTACTTTTACTTGTAAACCTTGTGCCTACTGCCTCGGA	Pool_11
5932	RBBP8.899	TGCTGTTGACAGTGAGCGCCAAGAAGAATCTGAAACTCAATAGTGAAGCCACAGATGTATTGAGTTTCAGATTCTTCTTGATGCCTACTGCCTCGGA	Pool_11
5932	RBBP8.2387	TGCTGTTGACAGTGAGCGCCACACTCATGGTGATAAACAATAGTGAAGCCACAGATGTATTGTTTATCACCATGAGTGTGTTGCCTACTGCCTCGGA	Pool_11
5932	RBBP8.1549	TGCTGTTGACAGTGAGCGCTGGAGACTGTGTGATGGATAATAGTGAAGCCACAGATGTATTATCCATCACACAGTCTCCATTGCCTACTGCCTCGGA	Pool_11
5932	RBBP8.1604	TGCTGTTGACAGTGAGCGCCAGCGTCAAGAGAAAAGCCAATAGTGAAGCCACAGATGTATTGGCTTTTCTCTTGACGCTGATGCCTACTGCCTCGGA	Pool_11
5932	RBBP8.164	TGCTGTTGACAGTGAGCGCAAGGACCTTTGGACAAAACTATAGTGAAGCCACAGATGTATAGTTTTGTCCAAAGGTCCTTATGCCTACTGCCTCGGA	Pool_11
5965	RECQL.3277	TGCTGTTGACAGTGAGCGCAAGGAGTAAGTCATCAATATATAGTGAAGCCACAGATGTATATATTGATGACTTACTCCTTTTGCCTACTGCCTCGGA	Pool_11
5965	RECQL.3533	TGCTGTTGACAGTGAGCGCCAGTGTTGTATTGGAAAGATATAGTGAAGCCACAGATGTATATCTTTCCAATACAACACTGATGCCTACTGCCTCGGA	Pool_11
5965	RECQL.3256	TGCTGTTGACAGTGAGCGACAGAAGTACAATTCAACAAAATAGTGAAGCCACAGATGTATTTTGTTGAATTGTACTTCTGGTGCCTACTGCCTCGGA	Pool_11
5965	RECQL.2333	TGCTGTTGACAGTGAGCGCAAGATGGTTTATGCATGTATATAGTGAAGCCACAGATGTATATACATGCATAAACCATCTTTTGCCTACTGCCTCGGA	Pool_11
5965	RECQL.2368	TGCTGTTGACAGTGAGCGATAGTTAGACAATAGTTTTTAATAGTGAAGCCACAGATGTATTAAAAACTATTGTCTAACTACTGCCTACTGCCTCGGA	Pool_11
5965	RECQL.710	TGCTGTTGACAGTGAGCGCAAGAGCTTATGTTACCAGTTATAGTGAAGCCACAGATGTATAACTGGTAACATAAGCTCTTTTGCCTACTGCCTCGGA	Pool_11
5982	RFC2.955	TGCTGTTGACAGTGAGCGACAAGGCTGTGTCAGAAGACAATAGTGAAGCCACAGATGTATTGTCTTCTGACACAGCCTTGCTGCCTACTGCCTCGGA	Pool_11
5982	RFC2.956	TGCTGTTGACAGTGAGCGAAAGGCTGTGTCAGAAGACAATTAGTGAAGCCACAGATGTAATTGTCTTCTGACACAGCCTTGTGCCTACTGCCTCGGA	Pool_11
5982	RFC2.398	TGCTGTTGACAGTGAGCGAAACCATGGAAATCTACTCTAATAGTGAAGCCACAGATGTATTAGAGTAGATTTCCATGGTTCTGCCTACTGCCTCGGA	Pool_11
5982	RFC2.530	TGCTGTTGACAGTGAGCGACAGGCTGATGAATGTTATCGATAGTGAAGCCACAGATGTATCGATAACATTCATCAGCCTGGTGCCTACTGCCTCGGA	Pool_11
5982	RFC2.1188	TGCTGTTGACAGTGAGCGCGAGGTCAGAAGTTCAAGACCATAGTGAAGCCACAGATGTATGGTCTTGAACTTCTGACCTCATGCCTACTGCCTCGGA	Pool_11
5982	RFC2.821	TGCTGTTGACAGTGAGCGACAACATCTTTCGAGTGTGTAATAGTGAAGCCACAGATGTATTACACACTCGAAAGATGTTGCTGCCTACTGCCTCGGA	Pool_11
5984	RFC4.617	TGCTGTTGACAGTGAGCGACCGATTCTGTCTTATCTGTAATAGTGAAGCCACAGATGTATTACAGATAAGACAGAATCGGGTGCCTACTGCCTCGGA	Pool_11
5984	RFC4.1062	TGCTGTTGACAGTGAGCGCCAGAAGTCTATTATCACAGAATAGTGAAGCCACAGATGTATTCTGTGATAATAGACTTCTGTTGCCTACTGCCTCGGA	Pool_11
5984	RFC4.112	TGCTGTTGACAGTGAGCGCAAGGTACATCCATCAGTACTATAGTGAAGCCACAGATGTATAGTACTGATGGATGTACCTTTTGCCTACTGCCTCGGA	Pool_11
5984	RFC4.790	TGCTGTTGACAGTGAGCGCAAGTGTCAGAAGGAGACTTAATAGTGAAGCCACAGATGTATTAAGTCTCCTTCTGACACTTTTGCCTACTGCCTCGGA	Pool_11
5984	RFC4.769	TGCTGTTGACAGTGAGCGAAGGGAATAGCTTATCTTGTTATAGTGAAGCCACAGATGTATAACAAGATAAGCTATTCCCTCTGCCTACTGCCTCGGA	Pool_11
5984	RFC4.854	TGCTGTTGACAGTGAGCGATGGAAAGGAGATCACAGAGAATAGTGAAGCCACAGATGTATTCTCTGTGATCTCCTTTCCACTGCCTACTGCCTCGGA	Pool_11
5985	RFC5.1516	TGCTGTTGACAGTGAGCGATCCAAGTGTCTTCCTACTCAATAGTGAAGCCACAGATGTATTGAGTAGGAAGACACTTGGACTGCCTACTGCCTCGGA	Pool_11
5985	RFC5.459	TGCTGTTGACAGTGAGCGATAGCACAAGGACAATATTTAATAGTGAAGCCACAGATGTATTAAATATTGTCCTTGTGCTAGTGCCTACTGCCTCGGA	Pool_11
5985	RFC5.358	TGCTGTTGACAGTGAGCGCCAGCTATATAAAGACAAAGAATAGTGAAGCCACAGATGTATTCTTTGTCTTTATATAGCTGTTGCCTACTGCCTCGGA	Pool_11
5985	RFC5.1719	TGCTGTTGACAGTGAGCGACAGGTTCCAAATTGATGTGTATAGTGAAGCCACAGATGTATACACATCAATTTGGAACCTGCTGCCTACTGCCTCGGA	Pool_11
5985	RFC5.1850	TGCTGTTGACAGTGAGCGCAAGGTTGAGCCTGACTGTAAATAGTGAAGCCACAGATGTATTTACAGTCAGGCTCAACCTTATGCCTACTGCCTCGGA	Pool_11
5985	RFC5.1490	TGCTGTTGACAGTGAGCGCACAGAAGACTTTCAAATTTAATAGTGAAGCCACAGATGTATTAAATTTGAAAGTCTTCTGTTTGCCTACTGCCTCGGA	Pool_11
55159	RFWD3.1828	TGCTGTTGACAGTGAGCGACAGGAGTTAGTAGCTCAGAAATAGTGAAGCCACAGATGTATTTCTGAGCTACTAACTCCTGCTGCCTACTGCCTCGGA	Pool_11
55159	RFWD3.437	TGCTGTTGACAGTGAGCGACAGCATCTTCGTTGCATTCAATAGTGAAGCCACAGATGTATTGAATGCAACGAAGATGCTGGTGCCTACTGCCTCGGA	Pool_11
55159	RFWD3.1648	TGCTGTTGACAGTGAGCGCTCCCTAGACAACACTATTAAATAGTGAAGCCACAGATGTATTTAATAGTGTTGTCTAGGGAATGCCTACTGCCTCGGA	Pool_11
55159	RFWD3.842	TGCTGTTGACAGTGAGCGACAGAGCAAGAAGTTACATGTATAGTGAAGCCACAGATGTATACATGTAACTTCTTGCTCTGCTGCCTACTGCCTCGGA	Pool_11
55159	RFWD3.1189	TGCTGTTGACAGTGAGCGAAAGGAACAGATGCTAAGGAAATAGTGAAGCCACAGATGTATTTCCTTAGCATCTGTTCCTTCTGCCTACTGCCTCGGA	Pool_11
55159	RFWD3.4622	TGCTGTTGACAGTGAGCGCCAGAGCAAGACTCCATCTCAATAGTGAAGCCACAGATGTATTGAGATGGAGTCTTGCTCTGTTGCCTACTGCCTCGGA	Pool_11
60561	RINT1.2069	TGCTGTTGACAGTGAGCGACACGTTTTTAGAGAAGTTAAATAGTGAAGCCACAGATGTATTTAACTTCTCTAAAAACGTGGTGCCTACTGCCTCGGA	Pool_11
60561	RINT1.1202	TGCTGTTGACAGTGAGCGAAACCGGCAGACTAATGTGTTATAGTGAAGCCACAGATGTATAACACATTAGTCTGCCGGTTCTGCCTACTGCCTCGGA	Pool_11
60561	RINT1.2552	TGCTGTTGACAGTGAGCGCCAACAAGATGTTGAGATTCTATAGTGAAGCCACAGATGTATAGAATCTCAACATCTTGTTGATGCCTACTGCCTCGGA	Pool_11
60561	RINT1.335	TGCTGTTGACAGTGAGCGCACAGTTCTTATTGGAAGTAAATAGTGAAGCCACAGATGTATTTACTTCCAATAAGAACTGTATGCCTACTGCCTCGGA	Pool_11
60561	RINT1.2872	TGCTGTTGACAGTGAGCGAACGAGCAGAGATATTAAATTATAGTGAAGCCACAGATGTATAATTTAATATCTCTGCTCGTCTGCCTACTGCCTCGGA	Pool_11
60561	RINT1.2738	TGCTGTTGACAGTGAGCGCTGGATTTATGGTGTTATTAAATAGTGAAGCCACAGATGTATTTAATAACACCATAAATCCAATGCCTACTGCCTCGGA	Pool_11
6117	RPA1.1652	TGCTGTTGACAGTGAGCGCCCGCATGATCCTGTCAGTAAATAGTGAAGCCACAGATGTATTTACTGACAGGATCATGCGGTTGCCTACTGCCTCGGA	Pool_11
6117	RPA1.1838	TGCTGTTGACAGTGAGCGCCAGGGTCAAAGTGGAGACCTATAGTGAAGCCACAGATGTATAGGTCTCCACTTTGACCCTGATGCCTACTGCCTCGGA	Pool_11
6117	RPA1.915	TGCTGTTGACAGTGAGCGAAAGCAGTTCACAGCTGTTAAATAGTGAAGCCACAGATGTATTTAACAGCTGTGAACTGCTTGTGCCTACTGCCTCGGA	Pool_11
6117	RPA1.2502	TGCTGTTGACAGTGAGCGCTAGGGTAGAATGATTAATCAATAGTGAAGCCACAGATGTATTGATTAATCATTCTACCCTATTGCCTACTGCCTCGGA	Pool_11
6117	RPA1.914	TGCTGTTGACAGTGAGCGCCAAGCAGTTCACAGCTGTTAATAGTGAAGCCACAGATGTATTAACAGCTGTGAACTGCTTGTTGCCTACTGCCTCGGA	Pool_11
6117	RPA1.2033	TGCTGTTGACAGTGAGCGCCCGTGTGACGATCCCATGTTATAGTGAAGCCACAGATGTATAACATGGGATCGTCACACGGATGCCTACTGCCTCGGA	Pool_11
6119	RPA3.301	TGCTGTTGACAGTGAGCGATGGGATAGAGAAAGTGCTCAATAGTGAAGCCACAGATGTATTGAGCACTTTCTCTATCCCAGTGCCTACTGCCTCGGA	Pool_11
6119	RPA3.1556	TGCTGTTGACAGTGAGCGCTACGATTGTAAATGAGCTATATAGTGAAGCCACAGATGTATATAGCTCATTTACAATCGTATTGCCTACTGCCTCGGA	Pool_11
6119	RPA3.58	TGCTGTTGACAGTGAGCGAAAGGAGGACAACACACATTTATAGTGAAGCCACAGATGTATAAATGTGTGTTGTCCTCCTTCTGCCTACTGCCTCGGA	Pool_11
6119	RPA3.487	TGCTGTTGACAGTGAGCGCAAGCCTGAAGAAAGTGATCAATAGTGAAGCCACAGATGTATTGATCACTTTCTTCAGGCTTTTGCCTACTGCCTCGGA	Pool_11
6119	RPA3.1416	TGCTGTTGACAGTGAGCGATACATCTTATGTCCAGTTTAATAGTGAAGCCACAGATGTATTAAACTGGACATAAGATGTACTGCCTACTGCCTCGGA	Pool_11
6119	RPA3.1404	TGCTGTTGACAGTGAGCGACACCATCTTGTGTACATCTTATAGTGAAGCCACAGATGTATAAGATGTACACAAGATGGTGGTGCCTACTGCCTCGGA	Pool_11
7979	SHFM1.148	TGCTGTTGACAGTGAGCGACCGGTAGACTTAGGTCTGTTATAGTGAAGCCACAGATGTATAACAGACCTAAGTCTACCGGCTGCCTACTGCCTCGGA	Pool_11
7979	SHFM1.345	TGCTGTTGACAGTGAGCGCTCCAGAAGAAGTGTTGAAGTATAGTGAAGCCACAGATGTATACTTCAACACTTCTTCTGGATTGCCTACTGCCTCGGA	Pool_11
7979	SHFM1.121	TGCTGTTGACAGTGAGCGAACAGTCGAGATGTCAGAGAAATAGTGAAGCCACAGATGTATTTCTCTGACATCTCGACTGTCTGCCTACTGCCTCGGA	Pool_11
7979	SHFM1.122	TGCTGTTGACAGTGAGCGCCAGTCGAGATGTCAGAGAAAATAGTGAAGCCACAGATGTATTTTCTCTGACATCTCGACTGTTGCCTACTGCCTCGGA	Pool_11
7979	SHFM1.120	TGCTGTTGACAGTGAGCGAGACAGTCGAGATGTCAGAGAATAGTGAAGCCACAGATGTATTCTCTGACATCTCGACTGTCCTGCCTACTGCCTCGGA	Pool_11
7979	SHFM1.346	TGCTGTTGACAGTGAGCGCCCAGAAGAAGTGTTGAAGTAATAGTGAAGCCACAGATGTATTACTTCAACACTTCTTCTGGATGCCTACTGCCTCGGA	Pool_11
10592	SMC2.2489	TGCTGTTGACAGTGAGCGATAGCAAGAAGATGAAAGAAAATAGTGAAGCCACAGATGTATTTTCTTTCATCTTCTTGCTAGTGCCTACTGCCTCGGA	Pool_11
10592	SMC2.1401	TGCTGTTGACAGTGAGCGAAAGGATCAAGAAGCTCTAGAATAGTGAAGCCACAGATGTATTCTAGAGCTTCTTGATCCTTCTGCCTACTGCCTCGGA	Pool_11
10592	SMC2.2580	TGCTGTTGACAGTGAGCGCCAGCTTGAAGCTGTAAATGAATAGTGAAGCCACAGATGTATTCATTTACAGCTTCAAGCTGTTGCCTACTGCCTCGGA	Pool_11
10592	SMC2.2118	TGCTGTTGACAGTGAGCGCCAGGATGAACTGAGAATCAAATAGTGAAGCCACAGATGTATTTGATTCTCAGTTCATCCTGATGCCTACTGCCTCGGA	Pool_11
10592	SMC2.2090	TGCTGTTGACAGTGAGCGCAACCAAGTTTCAAGAACTCAATAGTGAAGCCACAGATGTATTGAGTTCTTGAAACTTGGTTATGCCTACTGCCTCGGA	Pool_11
10592	SMC2.3995	TGCTGTTGACAGTGAGCGATAGCTGATCATCAGTGTTTAATAGTGAAGCCACAGATGTATTAAACACTGATGATCAGCTACTGCCTACTGCCTCGGA	Pool_11
10051	SMC4.1199	TGCTGTTGACAGTGAGCGAAAGATGTTCAAGTTAGAGAAATAGTGAAGCCACAGATGTATTTCTCTAACTTGAACATCTTCTGCCTACTGCCTCGGA	Pool_11
10051	SMC4.4873	TGCTGTTGACAGTGAGCGCAAGGAATTAATTAAAGAGTTATAGTGAAGCCACAGATGTATAACTCTTTAATTAATTCCTTATGCCTACTGCCTCGGA	Pool_11
10051	SMC4.825	TGCTGTTGACAGTGAGCGATCGGAGAGTTGAAATATTAAATAGTGAAGCCACAGATGTATTTAATATTTCAACTCTCCGACTGCCTACTGCCTCGGA	Pool_11
10051	SMC4.870	TGCTGTTGACAGTGAGCGCCAGGGTAAAGATGGTGGAAAATAGTGAAGCCACAGATGTATTTTCCACCATCTTTACCCTGTTGCCTACTGCCTCGGA	Pool_11
10051	SMC4.4581	TGCTGTTGACAGTGAGCGACGGGTACTAAATGCATTTCAATAGTGAAGCCACAGATGTATTGAAATGCATTTAGTACCCGGTGCCTACTGCCTCGGA	Pool_11
10051	SMC4.1099	TGCTGTTGACAGTGAGCGAAAAGCTAAGAATAAAGATGTATAGTGAAGCCACAGATGTATACATCTTTATTCTTAGCTTTCTGCCTACTGCCTCGGA	Pool_11
23137	SMC5.1579	TGCTGTTGACAGTGAGCGCCACGATCAATATGAAAGATAATAGTGAAGCCACAGATGTATTATCTTTCATATTGATCGTGATGCCTACTGCCTCGGA	Pool_11
23137	SMC5.1136	TGCTGTTGACAGTGAGCGCCAGAAGCAAGATGTTATAGAATAGTGAAGCCACAGATGTATTCTATAACATCTTGCTTCTGTTGCCTACTGCCTCGGA	Pool_11
23137	SMC5.3163	TGCTGTTGACAGTGAGCGCCAGAGTAGTTGATGAAATCAATAGTGAAGCCACAGATGTATTGATTTCATCAACTACTCTGATGCCTACTGCCTCGGA	Pool_11
23137	SMC5.3497	TGCTGTTGACAGTGAGCGCAAGGAGATTCACTAAAACGAATAGTGAAGCCACAGATGTATTCGTTTTAGTGAATCTCCTTTTGCCTACTGCCTCGGA	Pool_11
23137	SMC5.2846	TGCTGTTGACAGTGAGCGCAAGAAAGTTGAACTAGATCAATAGTGAAGCCACAGATGTATTGATCTAGTTCAACTTTCTTTTGCCTACTGCCTCGGA	Pool_11
23137	SMC5.2808	TGCTGTTGACAGTGAGCGAAAGAAGAAATAGAACAGTTAATAGTGAAGCCACAGATGTATTAACTGTTCTATTTCTTCTTCTGCCTACTGCCTCGGA	Pool_11
6591	SNAI2.1565	TGCTGTTGACAGTGAGCGCCAGGAGAATGTATTAAAAGTATAGTGAAGCCACAGATGTATACTTTTAATACATTCTCCTGTTGCCTACTGCCTCGGA	Pool_11
6591	SNAI2.1844	TGCTGTTGACAGTGAGCGCTAGTTGATGAGTCAATGTAAATAGTGAAGCCACAGATGTATTTACATTGACTCATCAACTATTGCCTACTGCCTCGGA	Pool_11
6591	SNAI2.1347	TGCTGTTGACAGTGAGCGCAAGAACAGTATTGCTTTGTAATAGTGAAGCCACAGATGTATTACAAAGCAATACTGTTCTTTTGCCTACTGCCTCGGA	Pool_11
6591	SNAI2.988	TGCTGTTGACAGTGAGCGCCGCAATCAATGTTTACTCGAATAGTGAAGCCACAGATGTATTCGAGTAAACATTGATTGCGTTGCCTACTGCCTCGGA	Pool_11
6591	SNAI2.489	TGCTGTTGACAGTGAGCGACCCATTAGTGATGAAGAGGAATAGTGAAGCCACAGATGTATTCCTCTTCATCACTAATGGGGTGCCTACTGCCTCGGA	Pool_11
6591	SNAI2.1222	TGCTGTTGACAGTGAGCGCTGGCTAGATTGAGAGAATAAATAGTGAAGCCACAGATGTATTTATTCTCTCAATCTAGCCATTGCCTACTGCCTCGGA	Pool_11
8914	TIMELESS.4012	TGCTGTTGACAGTGAGCGACAGCAGCTCTCTGGAGATTTATAGTGAAGCCACAGATGTATAAATCTCCAGAGAGCTGCTGGTGCCTACTGCCTCGGA	Pool_11
8914	TIMELESS.4984	TGCTGTTGACAGTGAGCGCAAGGATGGATAAATACTGCAATAGTGAAGCCACAGATGTATTGCAGTATTTATCCATCCTTTTGCCTACTGCCTCGGA	Pool_11
8914	TIMELESS.4501	TGCTGTTGACAGTGAGCGATGGCTCAAACCTGTTGTCCTATAGTGAAGCCACAGATGTATAGGACAACAGGTTTGAGCCACTGCCTACTGCCTCGGA	Pool_11
8914	TIMELESS.4750	TGCTGTTGACAGTGAGCGCCAGAGCAAGACTCTGTCTCAATAGTGAAGCCACAGATGTATTGAGACAGAGTCTTGCTCTGTTGCCTACTGCCTCGGA	Pool_11
8914	TIMELESS.1561	TGCTGTTGACAGTGAGCGACAGCCGCATCATCAAGAACAATAGTGAAGCCACAGATGTATTGTTCTTGATGATGCGGCTGCTGCCTACTGCCTCGGA	Pool_11
8914	TIMELESS.4820	TGCTGTTGACAGTGAGCGCTCCCTACAGAAGACACAGAAATAGTGAAGCCACAGATGTATTTCTGTGTCTTCTGTAGGGAATGCCTACTGCCTCGGA	Pool_11
54962	TIPIN.487	TGCTGTTGACAGTGAGCGCAAGGAAGTTCAGACCTGTTTATAGTGAAGCCACAGATGTATAAACAGGTCTGAACTTCCTTTTGCCTACTGCCTCGGA	Pool_11
54962	TIPIN.757	TGCTGTTGACAGTGAGCGAACCCTAGGAAATGATATGTTATAGTGAAGCCACAGATGTATAACATATCATTTCCTAGGGTCTGCCTACTGCCTCGGA	Pool_11
54962	TIPIN.283	TGCTGTTGACAGTGAGCGAAAGCTGGATGCTCAGAGATTATAGTGAAGCCACAGATGTATAATCTCTGAGCATCCAGCTTGTGCCTACTGCCTCGGA	Pool_11
54962	TIPIN.983	TGCTGTTGACAGTGAGCGAAAGCTAGATAAGTTTCCATTATAGTGAAGCCACAGATGTATAATGGAAACTTATCTAGCTTCTGCCTACTGCCTCGGA	Pool_11
54962	TIPIN.1003	TGCTGTTGACAGTGAGCGCAAGAGAAAATGTATCTGTTAATAGTGAAGCCACAGATGTATTAACAGATACATTTTCTCTTATGCCTACTGCCTCGGA	Pool_11
54962	TIPIN.832	TGCTGTTGACAGTGAGCGCAAGGAGGAGTCAAATGGATTATAGTGAAGCCACAGATGTATAATCCATTTGACTCCTCCTTTTGCCTACTGCCTCGGA	Pool_11
54929	TMEM161A.133	TGCTGTTGACAGTGAGCGCCGGCAGTTTGTTCCGATACAATAGTGAAGCCACAGATGTATTGTATCGGAACAAACTGCCGTTGCCTACTGCCTCGGA	Pool_11
54929	TMEM161A.132	TGCTGTTGACAGTGAGCGCACGGCAGTTTGTTCCGATACATAGTGAAGCCACAGATGTATGTATCGGAACAAACTGCCGTTTGCCTACTGCCTCGGA	Pool_11
54929	TMEM161A.457	TGCTGTTGACAGTGAGCGCCACAGTGACCTTCTCCATCAATAGTGAAGCCACAGATGTATTGATGGAGAAGGTCACTGTGATGCCTACTGCCTCGGA	Pool_11
54929	TMEM161A.1125	TGCTGTTGACAGTGAGCGATCCGAGTCTACTGCTATGTGATAGTGAAGCCACAGATGTATCACATAGCAGTAGACTCGGACTGCCTACTGCCTCGGA	Pool_11
54929	TMEM161A.1761	TGCTGTTGACAGTGAGCGCAAGGAGCATGCCGATTTTTAATAGTGAAGCCACAGATGTATTAAAAATCGGCATGCTCCTTTTGCCTACTGCCTCGGA	Pool_11
54929	TMEM161A.130	TGCTGTTGACAGTGAGCGATAACGGCAGTTTGTTCCGATATAGTGAAGCCACAGATGTATATCGGAACAAACTGCCGTTACTGCCTACTGCCTCGGA	Pool_11
7153	TOP2A.1196	TGCTGTTGACAGTGAGCGAAAGGGTGGTGTTGCAGTAAAATAGTGAAGCCACAGATGTATTTTACTGCAACACCACCCTTGTGCCTACTGCCTCGGA	Pool_11
7153	TOP2A.705	TGCTGTTGACAGTGAGCGACCAGTAGAGAATACAAGAAAATAGTGAAGCCACAGATGTATTTTCTTGTATTCTCTACTGGCTGCCTACTGCCTCGGA	Pool_11
7153	TOP2A.3446	TGCTGTTGACAGTGAGCGCAAGGTTCCAGATGAAGAAGAATAGTGAAGCCACAGATGTATTCTTCTTCATCTGGAACCTTTTGCCTACTGCCTCGGA	Pool_11
7153	TOP2A.2129	TGCTGTTGACAGTGAGCGCCAGATAGATGATCGAAAGGAATAGTGAAGCCACAGATGTATTCCTTTCGATCATCTATCTGTTGCCTACTGCCTCGGA	Pool_11
7153	TOP2A.4060	TGCTGTTGACAGTGAGCGCTAGGAGCAGTGACGAAAGTAATAGTGAAGCCACAGATGTATTACTTTCGTCACTGCTCCTATTGCCTACTGCCTCGGA	Pool_11
7153	TOP2A.1701	TGCTGTTGACAGTGAGCGATGGGTCTTCAGTACAAGAAAATAGTGAAGCCACAGATGTATTTTCTTGTACTGAAGACCCACTGCCTACTGCCTCGGA	Pool_11
51499	TRIAP1.171	TGCTGTTGACAGTGAGCGATACCAGCAGTGTGTTCAGAAATAGTGAAGCCACAGATGTATTTCTGAACACACTGCTGGTAGTGCCTACTGCCTCGGA	Pool_11
51499	TRIAP1.177	TGCTGTTGACAGTGAGCGACAGTGTGTTCAGAAAGCAATATAGTGAAGCCACAGATGTATATTGCTTTCTGAACACACTGCTGCCTACTGCCTCGGA	Pool_11
51499	TRIAP1.175	TGCTGTTGACAGTGAGCGAAGCAGTGTGTTCAGAAAGCAATAGTGAAGCCACAGATGTATTGCTTTCTGAACACACTGCTGTGCCTACTGCCTCGGA	Pool_11
51499	TRIAP1.472	TGCTGTTGACAGTGAGCGACAGGAACTGTGTGCTAAAATTTAGTGAAGCCACAGATGTAAATTTTAGCACACAGTTCCTGCTGCCTACTGCCTCGGA	Pool_11
51499	TRIAP1.174	TGCTGTTGACAGTGAGCGACAGCAGTGTGTTCAGAAAGCATAGTGAAGCCACAGATGTATGCTTTCTGAACACACTGCTGGTGCCTACTGCCTCGGA	Pool_11
51499	TRIAP1.198	TGCTGTTGACAGTGAGCGCAAGGAGAAAGAGATTCCTATTTAGTGAAGCCACAGATGTAAATAGGAATCTCTTTCTCCTTTTGCCTACTGCCTCGGA	Pool_11
7298	TYMS.606	TGCTGTTGACAGTGAGCGCCAGGGAGTTGACCAACTGCAATAGTGAAGCCACAGATGTATTGCAGTTGGTCAACTCCCTGTTGCCTACTGCCTCGGA	Pool_11
7298	TYMS.578	TGCTGTTGACAGTGAGCGCCAGAGATATGGAATCAGATTATAGTGAAGCCACAGATGTATAATCTGATTCCATATCTCTGTTGCCTACTGCCTCGGA	Pool_11
7298	TYMS.626	TGCTGTTGACAGTGAGCGCAAGAGTGATTGACACCATCAATAGTGAAGCCACAGATGTATTGATGGTGTCAATCACTCTTTTGCCTACTGCCTCGGA	Pool_11
7298	TYMS.1147	TGCTGTTGACAGTGAGCGCAAAGTTCTTTTTGCTCTAAAATAGTGAAGCCACAGATGTATTTTAGAGCAAAAAGAACTTTTTGCCTACTGCCTCGGA	Pool_11
7298	TYMS.1359	TGCTGTTGACAGTGAGCGCAAACATGTATGTGCATTTCAATAGTGAAGCCACAGATGTATTGAAATGCACATACATGTTTTTGCCTACTGCCTCGGA	Pool_11
7298	TYMS.977	TGCTGTTGACAGTGAGCGCCAGGATTCTTCGAAAAGTTGATAGTGAAGCCACAGATGTATCAACTTTTCGAAGAATCCTGATGCCTACTGCCTCGGA	Pool_11
7319	UBE2A.571	TGCTGTTGACAGTGAGCGACAGGATGTTATTTTTAACAAATAGTGAAGCCACAGATGTATTTGTTAAAAATAACATCCTGGTGCCTACTGCCTCGGA	Pool_11
7319	UBE2A.178	TGCTGTTGACAGTGAGCGCAAGCGTGTTTCTGCAATAGTATAGTGAAGCCACAGATGTATACTATTGCAGAAACACGCTTTTGCCTACTGCCTCGGA	Pool_11
7319	UBE2A.526	TGCTGTTGACAGTGAGCGCAAGATGAATTGTTATACAAGATAGTGAAGCCACAGATGTATCTTGTATAACAATTCATCTTATGCCTACTGCCTCGGA	Pool_11
7319	UBE2A.798	TGCTGTTGACAGTGAGCGAAAGGACTCAGCTAAAGGAGTATAGTGAAGCCACAGATGTATACTCCTTTAGCTGAGTCCTTCTGCCTACTGCCTCGGA	Pool_11
7319	UBE2A.397	TGCTGTTGACAGTGAGCGCAACACCCTCTATGAAATCAAATAGTGAAGCCACAGATGTATTTGATTTCATAGAGGGTGTTTTGCCTACTGCCTCGGA	Pool_11
7319	UBE2A.490	TGCTGTTGACAGTGAGCGCCAGGCAGTTATTTTTATTATTTAGTGAAGCCACAGATGTAAATAATAAAAATAACTGCCTGATGCCTACTGCCTCGGA	Pool_11
51720	UIMC1.1450	TGCTGTTGACAGTGAGCGCAAGGAGGTTGGTAACAAGGAATAGTGAAGCCACAGATGTATTCCTTGTTACCAACCTCCTTATGCCTACTGCCTCGGA	Pool_11
51720	UIMC1.1431	TGCTGTTGACAGTGAGCGCCAGAATAATAATGGCAGATAATAGTGAAGCCACAGATGTATTATCTGCCATTATTATTCTGATGCCTACTGCCTCGGA	Pool_11
51720	UIMC1.1315	TGCTGTTGACAGTGAGCGACCAGAGAGTTCTGCAGAAGAATAGTGAAGCCACAGATGTATTCTTCTGCAGAACTCTCTGGCTGCCTACTGCCTCGGA	Pool_11
51720	UIMC1.189	TGCTGTTGACAGTGAGCGCAACGAAGACAAAACAGTCGAATAGTGAAGCCACAGATGTATTCGACTGTTTTGTCTTCGTTTTGCCTACTGCCTCGGA	Pool_11
51720	UIMC1.2244	TGCTGTTGACAGTGAGCGCCCCTAGTTCATTGTTGAGCAATAGTGAAGCCACAGATGTATTGCTCAACAATGAACTAGGGATGCCTACTGCCTCGGA	Pool_11
51720	UIMC1.1465	TGCTGTTGACAGTGAGCGAAAGGAAGATGCTGAGAAGGAATAGTGAAGCCACAGATGTATTCCTTCTCAGCATCTTCCTTGTGCCTACTGCCTCGGA	Pool_11
7374	UNG.285	TGCTGTTGACAGTGAGCGAACCCAGATGTGTGACATAAAATAGTGAAGCCACAGATGTATTTTATGTCACACATCTGGGTCTGCCTACTGCCTCGGA	Pool_11
7374	UNG.1317	TGCTGTTGACAGTGAGCGACAGCATAAGGATGTTTTGCAATAGTGAAGCCACAGATGTATTGCAAAACATCCTTATGCTGCTGCCTACTGCCTCGGA	Pool_11
7374	UNG.1804	TGCTGTTGACAGTGAGCGCACGCGAGGTTTGTTAATAAAATAGTGAAGCCACAGATGTATTTTATTAACAAACCTCGCGTATGCCTACTGCCTCGGA	Pool_11
7374	UNG.743	TGCTGTTGACAGTGAGCGATAGACACTTTTCAAAGACCAATAGTGAAGCCACAGATGTATTGGTCTTTGAAAAGTGTCTACTGCCTACTGCCTCGGA	Pool_11
7374	UNG.864	TGCTGTTGACAGTGAGCGACAGTTACGAAGTTCCACTGAATAGTGAAGCCACAGATGTATTCAGTGGAACTTCGTAACTGGTGCCTACTGCCTCGGA	Pool_11
7374	UNG.1375	TGCTGTTGACAGTGAGCGCCCTGATTGTAGTAGAGGTTAATAGTGAAGCCACAGATGTATTAACCTCTACTACAATCAGGATGCCTACTGCCTCGGA	Pool_11
7398	USP1.962	TGCTGTTGACAGTGAGCGACAGAGACAAACTAGATCAAAATAGTGAAGCCACAGATGTATTTTGATCTAGTTTGTCTCTGGTGCCTACTGCCTCGGA	Pool_11
7398	USP1.261	TGCTGTTGACAGTGAGCGACAGCACAGTCTTCACCTATAATAGTGAAGCCACAGATGTATTATAGGTGAAGACTGTGCTGCTGCCTACTGCCTCGGA	Pool_11
7398	USP1.1065	TGCTGTTGACAGTGAGCGCCACAAAAGAAATCAAGAGTTATAGTGAAGCCACAGATGTATAACTCTTGATTTCTTTTGTGATGCCTACTGCCTCGGA	Pool_11
7398	USP1.3154	TGCTGTTGACAGTGAGCGATGGGAGGTCAATAAAATTTAATAGTGAAGCCACAGATGTATTAAATTTTATTGACCTCCCAGTGCCTACTGCCTCGGA	Pool_11
7398	USP1.960	TGCTGTTGACAGTGAGCGCACCAGAGACAAACTAGATCAATAGTGAAGCCACAGATGTATTGATCTAGTTTGTCTCTGGTTTGCCTACTGCCTCGGA	Pool_11
7398	USP1.424	TGCTGTTGACAGTGAGCGAAAGGAAGAAAGAAGCTCTAAATAGTGAAGCCACAGATGTATTTAGAGCTTCTTTCTTCCTTGTGCCTACTGCCTCGGA	Pool_11
7486	WRN.4237	TGCTGTTGACAGTGAGCGACAGGAGACTCAGATTGTGTTATAGTGAAGCCACAGATGTATAACACAATCTGAGTCTCCTGCTGCCTACTGCCTCGGA	Pool_11
7486	WRN.5040	TGCTGTTGACAGTGAGCGACAGCAAGAAATTAATGGACAATAGTGAAGCCACAGATGTATTGTCCATTAATTTCTTGCTGGTGCCTACTGCCTCGGA	Pool_11
7486	WRN.1645	TGCTGTTGACAGTGAGCGCAAGGATATTTCAGAAAATCTATAGTGAAGCCACAGATGTATAGATTTTCTGAAATATCCTTTTGCCTACTGCCTCGGA	Pool_11
7486	WRN.4048	TGCTGTTGACAGTGAGCGAAAAGAGCATTGTTATAATCAATAGTGAAGCCACAGATGTATTGATTATAACAATGCTCTTTGTGCCTACTGCCTCGGA	Pool_11
7486	WRN.4794	TGCTGTTGACAGTGAGCGCCAGAATGTTAGTTCCTGAAAATAGTGAAGCCACAGATGTATTTTCAGGAACTAACATTCTGATGCCTACTGCCTCGGA	Pool_11
7486	WRN.5722	TGCTGTTGACAGTGAGCGCAACAATGTTTTTCATACTGAATAGTGAAGCCACAGATGTATTCAGTATGAAAAACATTGTTTTGCCTACTGCCTCGGA	Pool_11
10413	YAP1.3184	TGCTGTTGACAGTGAGCGCTAGAGTAGTAATGAAATTCTATAGTGAAGCCACAGATGTATAGAATTTCATTACTACTCTAATGCCTACTGCCTCGGA	Pool_11
10413	YAP1.3075	TGCTGTTGACAGTGAGCGCTAGGTTGATCACTCATAATAATAGTGAAGCCACAGATGTATTATTATGAGTGATCAACCTATTGCCTACTGCCTCGGA	Pool_11
10413	YAP1.2155	TGCTGTTGACAGTGAGCGAAAGTAGTTTAGTGTTCTAGAATAGTGAAGCCACAGATGTATTCTAGAACACTAAACTACTTCTGCCTACTGCCTCGGA	Pool_11
10413	YAP1.4244	TGCTGTTGACAGTGAGCGAAAGCATGTTGTTATAAGAATTTAGTGAAGCCACAGATGTAAATTCTTATAACAACATGCTTGTGCCTACTGCCTCGGA	Pool_11
10413	YAP1.803	TGCTGTTGACAGTGAGCGCCAGGTGATACTATCAACCAAATAGTGAAGCCACAGATGTATTTGGTTGATAGTATCACCTGTTGCCTACTGCCTCGGA	Pool_11
10413	YAP1.3579	TGCTGTTGACAGTGAGCGCTACCTCAGTGTTGTAGCAGTATAGTGAAGCCACAGATGTATACTGCTACAACACTGAGGTATTGCCTACTGCCTCGGA	Pool_11
26574	AATF.1733	TGCTGTTGACAGTGAGCGCTCCAGAAGTTACGAAGCAAAATAGTGAAGCCACAGATGTATTTTGCTTCGTAACTTCTGGATTGCCTACTGCCTCGGA	Pool_11
26574	AATF.1150	TGCTGTTGACAGTGAGCGATACCCAGACACTAGATATCTATAGTGAAGCCACAGATGTATAGATATCTAGTGTCTGGGTACTGCCTACTGCCTCGGA	Pool_11
26574	AATF.968	TGCTGTTGACAGTGAGCGAAAGGAAGGATCAAACTACAAATAGTGAAGCCACAGATGTATTTGTAGTTTGATCCTTCCTTCTGCCTACTGCCTCGGA	Pool_11
26574	AATF.1648	TGCTGTTGACAGTGAGCGACAGCTCCTTCGAGAACTCATATAGTGAAGCCACAGATGTATATGAGTTCTCGAAGGAGCTGGTGCCTACTGCCTCGGA	Pool_11
26574	AATF.1835	TGCTGTTGACAGTGAGCGACACCTATTGACCATACTACAATAGTGAAGCCACAGATGTATTGTAGTATGGTCAATAGGTGCTGCCTACTGCCTCGGA	Pool_11
26574	AATF.969	TGCTGTTGACAGTGAGCGCAGGAAGGATCAAACTACAAAATAGTGAAGCCACAGATGTATTTTGTAGTTTGATCCTTCCTTTGCCTACTGCCTCGGA	Pool_11
25	ABL1.1726	TGCTGTTGACAGTGAGCGCCAGCGCCTTGATCAAGAAGAATAGTGAAGCCACAGATGTATTCTTCTTGATCAAGGCGCTGATGCCTACTGCCTCGGA	Pool_11
25	ABL1.1729	TGCTGTTGACAGTGAGCGACGCCTTGATCAAGAAGAAGAATAGTGAAGCCACAGATGTATTCTTCTTCTTGATCAAGGCGCTGCCTACTGCCTCGGA	Pool_11
25	ABL1.158	TGCTGTTGACAGTGAGCGCAACACTCTAAGCATAACTAAATAGTGAAGCCACAGATGTATTTAGTTATGCTTAGAGTGTTATGCCTACTGCCTCGGA	Pool_11
25	ABL1.787	TGCTGTTGACAGTGAGCGATGCAGTCATGAAAGAGATCAATAGTGAAGCCACAGATGTATTGATCTCTTTCATGACTGCAGTGCCTACTGCCTCGGA	Pool_11
25	ABL1.853	TGCTGTTGACAGTGAGCGACCCGTTCTATATCATCACTGATAGTGAAGCCACAGATGTATCAGTGATGATATAGAACGGGGTGCCTACTGCCTCGGA	Pool_11
25	ABL1.2949	TGCTGTTGACAGTGAGCGCCCCGAGTGTCTCTTCGGAAAATAGTGAAGCCACAGATGTATTTTCCGAAGAGACACTCGGGTTGCCTACTGCCTCGGA	Pool_11
27301	APEX2.1888	TGCTGTTGACAGTGAGCGACAGGAAGTTGTGTGATTTTAATAGTGAAGCCACAGATGTATTAAAATCACACAACTTCCTGGTGCCTACTGCCTCGGA	Pool_11
27301	APEX2.1346	TGCTGTTGACAGTGAGCGACCCGAAGACTCCAGAAGAGAATAGTGAAGCCACAGATGTATTCTCTTCTGGAGTCTTCGGGGTGCCTACTGCCTCGGA	Pool_11
27301	APEX2.1143	TGCTGTTGACAGTGAGCGAACGCTGCAGCACAACAATCAATAGTGAAGCCACAGATGTATTGATTGTTGTGCTGCAGCGTCTGCCTACTGCCTCGGA	Pool_11
27301	APEX2.1889	TGCTGTTGACAGTGAGCGAAGGAAGTTGTGTGATTTTAAATAGTGAAGCCACAGATGTATTTAAAATCACACAACTTCCTGTGCCTACTGCCTCGGA	Pool_11
27301	APEX2.1887	TGCTGTTGACAGTGAGCGACCAGGAAGTTGTGTGATTTTATAGTGAAGCCACAGATGTATAAAATCACACAACTTCCTGGGTGCCTACTGCCTCGGA	Pool_11
27301	APEX2.268	TGCTGTTGACAGTGAGCGAAGGGTTATAACTCCTATTTCATAGTGAAGCCACAGATGTATGAAATAGGAGTTATAACCCTCTGCCTACTGCCTCGGA	Pool_11
581	BAX.115	TGCTGTTGACAGTGAGCGACAGCTCTGAGCAGATCATGAATAGTGAAGCCACAGATGTATTCATGATCTGCTCAGAGCTGGTGCCTACTGCCTCGGA	Pool_11
581	BAX.277	TGCTGTTGACAGTGAGCGCTGCCAGCAAACTGGTGCTCAATAGTGAAGCCACAGATGTATTGAGCACCAGTTTGCTGGCAATGCCTACTGCCTCGGA	Pool_11
581	BAX.112	TGCTGTTGACAGTGAGCGACACCAGCTCTGAGCAGATCATTAGTGAAGCCACAGATGTAATGATCTGCTCAGAGCTGGTGGTGCCTACTGCCTCGGA	Pool_11
581	BAX.114	TGCTGTTGACAGTGAGCGCCCAGCTCTGAGCAGATCATGATAGTGAAGCCACAGATGTATCATGATCTGCTCAGAGCTGGTTGCCTACTGCCTCGGA	Pool_11
581	BAX.220	TGCTGTTGACAGTGAGCGATGACATGTTTTCTGACGGCAATAGTGAAGCCACAGATGTATTGCCGTCAGAAAACATGTCAGTGCCTACTGCCTCGGA	Pool_11
581	BAX.209	TGCTGTTGACAGTGAGCGACGAGTGGCAGCTGACATGTTTTAGTGAAGCCACAGATGTAAAACATGTCAGCTGCCACTCGGTGCCTACTGCCTCGGA	Pool_11
604	BCL6.2472	TGCTGTTGACAGTGAGCGCTGGCAGAGTTGTAAATATATATAGTGAAGCCACAGATGTATATATATTTACAACTCTGCCATTGCCTACTGCCTCGGA	Pool_11
604	BCL6.2249	TGCTGTTGACAGTGAGCGCAAGGTGAACCATGTCAGCAAATAGTGAAGCCACAGATGTATTTGCTGACATGGTTCACCTTATGCCTACTGCCTCGGA	Pool_11
604	BCL6.2708	TGCTGTTGACAGTGAGCGACAAGTGAAGGTTTACAATTTATAGTGAAGCCACAGATGTATAAATTGTAAACCTTCACTTGCTGCCTACTGCCTCGGA	Pool_11
604	BCL6.1385	TGCTGTTGACAGTGAGCGACCGGCTCAATAACATCGTTAATAGTGAAGCCACAGATGTATTAACGATGTTATTGAGCCGGCTGCCTACTGCCTCGGA	Pool_11
604	BCL6.859	TGCTGTTGACAGTGAGCGACACGAAGTGATATGCACTACATAGTGAAGCCACAGATGTATGTAGTGCATATCACTTCGTGCTGCCTACTGCCTCGGA	Pool_11
604	BCL6.2410	TGCTGTTGACAGTGAGCGCAGACTTCAGTATGTTGTCAAATAGTGAAGCCACAGATGTATTTGACAACATACTGAAGTCTTTGCCTACTGCCTCGGA	Pool_11
890	CCNA2.1130	TGCTGTTGACAGTGAGCGATAGCAGAGTTTGTGTACATTATAGTGAAGCCACAGATGTATAATGTACACAAACTCTGCTACTGCCTACTGCCTCGGA	Pool_11
890	CCNA2.2211	TGCTGTTGACAGTGAGCGCCAGACGAGAAATGCTCCAGAATAGTGAAGCCACAGATGTATTCTGGAGCATTTCTCGTCTGTTGCCTACTGCCTCGGA	Pool_11
890	CCNA2.1282	TGCTGTTGACAGTGAGCGCAACTGCAAAGTTGAAAGTTTATAGTGAAGCCACAGATGTATAAACTTTCAACTTTGCAGTTTTGCCTACTGCCTCGGA	Pool_11
890	CCNA2.1511	TGCTGTTGACAGTGAGCGACACAGCATGCACAACAGTCAATAGTGAAGCCACAGATGTATTGACTGTTGTGCATGCTGTGGTGCCTACTGCCTCGGA	Pool_11
890	CCNA2.808	TGCTGTTGACAGTGAGCGCAAGCCAGTGAGTGTTAATGAATAGTGAAGCCACAGATGTATTCATTAACACTCACTGGCTTTTGCCTACTGCCTCGGA	Pool_11
890	CCNA2.2073	TGCTGTTGACAGTGAGCGCTACAGTATTCAGAGATAGATATAGTGAAGCCACAGATGTATATCTATCTCTGAATACTGTATTGCCTACTGCCTCGGA	Pool_11
595	CCND1.2467	TGCTGTTGACAGTGAGCGCCCGGAAGGTTTTTAAACACTATAGTGAAGCCACAGATGTATAGTGTTTAAAAACCTTCCGGTTGCCTACTGCCTCGGA	Pool_11
595	CCND1.4247	TGCTGTTGACAGTGAGCGCAAAGACAAACATGAAAGTCTATAGTGAAGCCACAGATGTATAGACTTTCATGTTTGTCTTTTTGCCTACTGCCTCGGA	Pool_11
595	CCND1.1365	TGCTGTTGACAGTGAGCGAAGGGTTGTGCTACAGATGATATAGTGAAGCCACAGATGTATATCATCTGTAGCACAACCCTCTGCCTACTGCCTCGGA	Pool_11
595	CCND1.1689	TGCTGTTGACAGTGAGCGCAAGTCATTGTATGTTATTATATAGTGAAGCCACAGATGTATATAATAACATACAATGACTTATGCCTACTGCCTCGGA	Pool_11
595	CCND1.3671	TGCTGTTGACAGTGAGCGCTAGCTTCTGGAATTTGTTCAATAGTGAAGCCACAGATGTATTGAACAAATTCCAGAAGCTATTGCCTACTGCCTCGGA	Pool_11
595	CCND1.1910	TGCTGTTGACAGTGAGCGATCCTACGATACGCTACTATAATAGTGAAGCCACAGATGTATTATAGTAGCGTATCGTAGGAGTGCCTACTGCCTCGGA	Pool_11
972	CD74.672	TGCTGTTGACAGTGAGCGCCCCTTGGACAAGACAAACCAATAGTGAAGCCACAGATGTATTGGTTTGTCTTGTCCAAGGGTTGCCTACTGCCTCGGA	Pool_11
972	CD74.700	TGCTGTTGACAGTGAGCGCCAGCAGATAACAATGCAGCAATAGTGAAGCCACAGATGTATTGCTGCATTGTTATCTGCTGTTGCCTACTGCCTCGGA	Pool_11
972	CD74.867	TGCTGTTGACAGTGAGCGCCAGGGAGAAGGGATAACCCTATAGTGAAGCCACAGATGTATAGGGTTATCCCTTCTCCCTGTTGCCTACTGCCTCGGA	Pool_11
972	CD74.1097	TGCTGTTGACAGTGAGCGAGCCATGGTTCACATTAGAATATAGTGAAGCCACAGATGTATATTCTAATGTGAACCATGGCCTGCCTACTGCCTCGGA	Pool_11
972	CD74.76	TGCTGTTGACAGTGAGCGACGCGACCTTATCTCCAACAATTAGTGAAGCCACAGATGTAATTGTTGGAGATAAGGTCGCGCTGCCTACTGCCTCGGA	Pool_11
972	CD74.1094	TGCTGTTGACAGTGAGCGAAGGGCCATGGTTCACATTAGATAGTGAAGCCACAGATGTATCTAATGTGAACCATGGCCCTGTGCCTACTGCCTCGGA	Pool_11
1054	CEBPG.2068	TGCTGTTGACAGTGAGCGCTACGTCAGTGTTGGTAGTTTATAGTGAAGCCACAGATGTATAAACTACCAACACTGACGTAATGCCTACTGCCTCGGA	Pool_11
1054	CEBPG.2634	TGCTGTTGACAGTGAGCGACAGCTGATTGGTGTTACATAATAGTGAAGCCACAGATGTATTATGTAACACCAATCAGCTGCTGCCTACTGCCTCGGA	Pool_11
1054	CEBPG.627	TGCTGTTGACAGTGAGCGAAAGGAATTAAGTGTACTCAAATAGTGAAGCCACAGATGTATTTGAGTACACTTAATTCCTTGTGCCTACTGCCTCGGA	Pool_11
1054	CEBPG.527	TGCTGTTGACAGTGAGCGACCGGTTGAAAAGCAAGCAGAATAGTGAAGCCACAGATGTATTCTGCTTGCTTTTCAACCGGCTGCCTACTGCCTCGGA	Pool_11
1054	CEBPG.1404	TGCTGTTGACAGTGAGCGAAAGCAAATAGATTAAACACAATAGTGAAGCCACAGATGTATTGTGTTTAATCTATTTGCTTCTGCCTACTGCCTCGGA	Pool_11
1054	CEBPG.3538	TGCTGTTGACAGTGAGCGCTAGGAGAATTGTTTTGTTTCATAGTGAAGCCACAGATGTATGAAACAAAACAATTCTCCTAATGCCTACTGCCTCGGA	Pool_11
22897	CEP164.1988	TGCTGTTGACAGTGAGCGAAAGCAAGAGAAGATGCAGCAATAGTGAAGCCACAGATGTATTGCTGCATCTTCTCTTGCTTGTGCCTACTGCCTCGGA	Pool_11
22897	CEP164.4689	TGCTGTTGACAGTGAGCGACACACATTCTGTGACTATATATAGTGAAGCCACAGATGTATATATAGTCACAGAATGTGTGGTGCCTACTGCCTCGGA	Pool_11
22897	CEP164.2692	TGCTGTTGACAGTGAGCGCGAGGAGGTTGGACAAGATGAATAGTGAAGCCACAGATGTATTCATCTTGTCCAACCTCCTCTTGCCTACTGCCTCGGA	Pool_11
22897	CEP164.947	TGCTGTTGACAGTGAGCGAAAGGATGTTTCTCTGGATTCATAGTGAAGCCACAGATGTATGAATCCAGAGAAACATCCTTCTGCCTACTGCCTCGGA	Pool_11
22897	CEP164.424	TGCTGTTGACAGTGAGCGCTCGGAGCTTGGTGATCCAAGATAGTGAAGCCACAGATGTATCTTGGATCACCAAGCTCCGATTGCCTACTGCCTCGGA	Pool_11
22897	CEP164.4915	TGCTGTTGACAGTGAGCGAAAGGAGGTTGTGTGTATGGTTTAGTGAAGCCACAGATGTAAACCATACACACAACCTCCTTGTGCCTACTGCCTCGGA	Pool_11
10519	CIB1.928	TGCTGTTGACAGTGAGCGATCCGTTTGTGTTTGTACTAATTAGTGAAGCCACAGATGTAATTAGTACAAACACAAACGGAGTGCCTACTGCCTCGGA	Pool_11
10519	CIB1.446	TGCTGTTGACAGTGAGCGACTCAGTGTGTTCAGTGACACATAGTGAAGCCACAGATGTATGTGTCACTGAACACACTGAGGTGCCTACTGCCTCGGA	Pool_11
10519	CIB1.927	TGCTGTTGACAGTGAGCGACTCCGTTTGTGTTTGTACTAATAGTGAAGCCACAGATGTATTAGTACAAACACAAACGGAGCTGCCTACTGCCTCGGA	Pool_11
10519	CIB1.934	TGCTGTTGACAGTGAGCGCTGTGTTTGTACTAATCAGTAATAGTGAAGCCACAGATGTATTACTGATTAGTACAAACACAATGCCTACTGCCTCGGA	Pool_11
10519	CIB1.944	TGCTGTTGACAGTGAGCGCCTAATCAGTAATAAAGGTTTATAGTGAAGCCACAGATGTATAAACCTTTATTACTGATTAGTTGCCTACTGCCTCGGA	Pool_11
10519	CIB1.444	TGCTGTTGACAGTGAGCGATCCTCAGTGTGTTCAGTGACATAGTGAAGCCACAGATGTATGTCACTGAACACACTGAGGAGTGCCTACTGCCTCGGA	Pool_11
1407	CRY1.2715	TGCTGTTGACAGTGAGCGCAAGCAGTTACATATTGAAATATAGTGAAGCCACAGATGTATATTTCAATATGTAACTGCTTTTGCCTACTGCCTCGGA	Pool_11
1407	CRY1.1370	TGCTGTTGACAGTGAGCGCTACTTCAGAAGTGATAGAAAATAGTGAAGCCACAGATGTATTTTCTATCACTTCTGAAGTAATGCCTACTGCCTCGGA	Pool_11
1407	CRY1.3114	TGCTGTTGACAGTGAGCGCCACAGACAGTATATGTTTTAATAGTGAAGCCACAGATGTATTAAAACATATACTGTCTGTGTTGCCTACTGCCTCGGA	Pool_11
1407	CRY1.1265	TGCTGTTGACAGTGAGCGCAGACAAGATCATAGAACTCAATAGTGAAGCCACAGATGTATTGAGTTCTATGATCTTGTCTATGCCTACTGCCTCGGA	Pool_11
1407	CRY1.1624	TGCTGTTGACAGTGAGCGATCCGATTTGGTTGTTTGTCATTAGTGAAGCCACAGATGTAATGACAAACAACCAAATCGGAGTGCCTACTGCCTCGGA	Pool_11
1407	CRY1.1038	TGCTGTTGACAGTGAGCGCGAGGATCTTGATGCCAATCTATAGTGAAGCCACAGATGTATAGATTGGCATCAAGATCCTCATGCCTACTGCCTCGGA	Pool_11
8451	CUL4A.1087	TGCTGTTGACAGTGAGCGCAAGCATGTGGATTCAAAGTTATAGTGAAGCCACAGATGTATAACTTTGAATCCACATGCTTTTGCCTACTGCCTCGGA	Pool_11
8451	CUL4A.1837	TGCTGTTGACAGTGAGCGAAAGCACAAGTTGTTTAGAATATAGTGAAGCCACAGATGTATATTCTAAACAACTTGTGCTTGTGCCTACTGCCTCGGA	Pool_11
8451	CUL4A.1186	TGCTGTTGACAGTGAGCGACACGGTAAAGATGTCTTTGAATAGTGAAGCCACAGATGTATTCAAAGACATCTTTACCGTGGTGCCTACTGCCTCGGA	Pool_11
8451	CUL4A.394	TGCTGTTGACAGTGAGCGCACCCATATTATTAGTGATAAATAGTGAAGCCACAGATGTATTTATCACTAATAATATGGGTTTGCCTACTGCCTCGGA	Pool_11
8451	CUL4A.1959	TGCTGTTGACAGTGAGCGCCAGAATAATGAAGATGAGAAATAGTGAAGCCACAGATGTATTTCTCATCTTCATTATTCTGATGCCTACTGCCTCGGA	Pool_11
8451	CUL4A.1838	TGCTGTTGACAGTGAGCGCAGCACAAGTTGTTTAGAATAATAGTGAAGCCACAGATGTATTATTCTAAACAACTTGTGCTTTGCCTACTGCCTCGGA	Pool_11
8450	CUL4B.520	TGCTGTTGACAGTGAGCGATAAGAAGTTAGTGATCAAGAATAGTGAAGCCACAGATGTATTCTTGATCACTAACTTCTTAGTGCCTACTGCCTCGGA	Pool_11
8450	CUL4B.3525	TGCTGTTGACAGTGAGCGAAACGTGTTTTGTAAATTGTTATAGTGAAGCCACAGATGTATAACAATTTACAAAACACGTTCTGCCTACTGCCTCGGA	Pool_11
8450	CUL4B.1626	TGCTGTTGACAGTGAGCGCTAGCTAAGTATGTAGATTCAATAGTGAAGCCACAGATGTATTGAATCTACATACTTAGCTATTGCCTACTGCCTCGGA	Pool_11
8450	CUL4B.1441	TGCTGTTGACAGTGAGCGCTGGCAGCACTATTGTAATTAATAGTGAAGCCACAGATGTATTAATTACAATAGTGCTGCCAATGCCTACTGCCTCGGA	Pool_11
8450	CUL4B.3623	TGCTGTTGACAGTGAGCGCTGGACCAATTGTAGATTGTTATAGTGAAGCCACAGATGTATAACAATCTACAATTGGTCCAATGCCTACTGCCTCGGA	Pool_11
8450	CUL4B.4481	TGCTGTTGACAGTGAGCGCGAGATGTAGACTATTACACAATAGTGAAGCCACAGATGTATTGTGTAATAGTCTACATCTCATGCCTACTGCCTCGGA	Pool_11
1956	EGFR.573	TGCTGTTGACAGTGAGCGCGAGGAAATATGTACTACGAAATAGTGAAGCCACAGATGTATTTCGTAGTACATATTTCCTCTTGCCTACTGCCTCGGA	Pool_11
1956	EGFR.1418	TGCTGTTGACAGTGAGCGCCAGGAACTGGATATTCTGAAATAGTGAAGCCACAGATGTATTTCAGAATATCCAGTTCCTGTTGCCTACTGCCTCGGA	Pool_11
1956	EGFR.1309	TGCTGTTGACAGTGAGCGATACGAATATTAAACACTTCAATAGTGAAGCCACAGATGTATTGAAGTGTTTAATATTCGTAGTGCCTACTGCCTCGGA	Pool_11
1956	EGFR.754	TGCTGTTGACAGTGAGCGCCAGCAGTGACTTTCTCAGCAATAGTGAAGCCACAGATGTATTGCTGAGAAAGTCACTGCTGATGCCTACTGCCTCGGA	Pool_11
1956	EGFR.1219	TGCTGTTGACAGTGAGCGCCCGCAAGTGTAAGAAGTGCGATAGTGAAGCCACAGATGTATCGCACTTCTTACACTTGCGGATGCCTACTGCCTCGGA	Pool_11
1956	EGFR.397	TGCTGTTGACAGTGAGCGCCAGCCTCCAGAGGATGTTCAATAGTGAAGCCACAGATGTATTGAACATCCTCTGGAGGCTGATGCCTACTGCCTCGGA	Pool_11
2067	ERCC1.383	TGCTGTTGACAGTGAGCGCTGGCGACGTAATTCCCGACTATAGTGAAGCCACAGATGTATAGTCGGGAATTACGTCGCCAATGCCTACTGCCTCGGA	Pool_11
2067	ERCC1.64	TGCTGTTGACAGTGAGCGACAGCAAGGAAGAAATTTGTGATAGTGAAGCCACAGATGTATCACAAATTTCTTCCTTGCTGGTGCCTACTGCCTCGGA	Pool_11
2067	ERCC1.561	TGCTGTTGACAGTGAGCGAAAGGAGCTGGCTAAGATGTGTTAGTGAAGCCACAGATGTAACACATCTTAGCCAGCTCCTTGTGCCTACTGCCTCGGA	Pool_11
2067	ERCC1.192	TGCTGTTGACAGTGAGCGATACGCCGAATATGCCATCTCATAGTGAAGCCACAGATGTATGAGATGGCATATTCGGCGTAGTGCCTACTGCCTCGGA	Pool_11
2067	ERCC1.384	TGCTGTTGACAGTGAGCGCGGCGACGTAATTCCCGACTATTAGTGAAGCCACAGATGTAATAGTCGGGAATTACGTCGCCATGCCTACTGCCTCGGA	Pool_11
2067	ERCC1.123	TGCTGTTGACAGTGAGCGAAAGCCCTTATTCCGATCTACATAGTGAAGCCACAGATGTATGTAGATCGGAATAAGGGCTTGTGCCTACTGCCTCGGA	Pool_11
1161	ERCC8.618	TGCTGTTGACAGTGAGCGCCAGGGTCACAGACAAGAAATATAGTGAAGCCACAGATGTATATTTCTTGTCTGTGACCCTGTTGCCTACTGCCTCGGA	Pool_11
1161	ERCC8.1424	TGCTGTTGACAGTGAGCGCAACAGACTTCTGTATAGTTTATAGTGAAGCCACAGATGTATAAACTATACAGAAGTCTGTTTTGCCTACTGCCTCGGA	Pool_11
1161	ERCC8.772	TGCTGTTGACAGTGAGCGCCACAAGCTGTTGAATCAGCAATAGTGAAGCCACAGATGTATTGCTGATTCAACAGCTTGTGATGCCTACTGCCTCGGA	Pool_11
1161	ERCC8.1547	TGCTGTTGACAGTGAGCGCCAGCAGATTTTATGAACTATATAGTGAAGCCACAGATGTATATAGTTCATAAAATCTGCTGATGCCTACTGCCTCGGA	Pool_11
1161	ERCC8.1196	TGCTGTTGACAGTGAGCGATACAACAAAATCACAATTAAATAGTGAAGCCACAGATGTATTTAATTGTGATTTTGTTGTAGTGCCTACTGCCTCGGA	Pool_11
1161	ERCC8.685	TGCTGTTGACAGTGAGCGACAAGTGCTGACAGTAGAGTAATAGTGAAGCCACAGATGTATTACTCTACTGTCAGCACTTGCTGCCTACTGCCTCGGA	Pool_11
2178	FANCE.667	TGCTGTTGACAGTGAGCGACAGAGACAGCTCCAAAGTCTATAGTGAAGCCACAGATGTATAGACTTTGGAGCTGTCTCTGGTGCCTACTGCCTCGGA	Pool_11
2178	FANCE.982	TGCTGTTGACAGTGAGCGCTCGAATCTGGATGATGCTAAATAGTGAAGCCACAGATGTATTTAGCATCATCCAGATTCGAATGCCTACTGCCTCGGA	Pool_11
2178	FANCE.2259	TGCTGTTGACAGTGAGCGACACCCAAAGTGTTGAGATTTATAGTGAAGCCACAGATGTATAAATCTCAACACTTTGGGTGCTGCCTACTGCCTCGGA	Pool_11
2178	FANCE.2540	TGCTGTTGACAGTGAGCGCAAGCAAGTTCAATAATGAAAATAGTGAAGCCACAGATGTATTTTCATTATTGAACTTGCTTTTGCCTACTGCCTCGGA	Pool_11
2178	FANCE.2461	TGCTGTTGACAGTGAGCGAAAGCTCTTGTGCTCATGTATATAGTGAAGCCACAGATGTATATACATGAGCACAAGAGCTTCTGCCTACTGCCTCGGA	Pool_11
2178	FANCE.886	TGCTGTTGACAGTGAGCGCCCCGAACATAAGTCACTGGAATAGTGAAGCCACAGATGTATTCCAGTGACTTATGTTCGGGTTGCCTACTGCCTCGGA	Pool_11
2189	FANCG.1276	TGCTGTTGACAGTGAGCGCTCCACAGAGAGCACTGTTGTATAGTGAAGCCACAGATGTATACAACAGTGCTCTCTGTGGATTGCCTACTGCCTCGGA	Pool_11
2189	FANCG.216	TGCTGTTGACAGTGAGCGACCGCGGGAACTAACTCTTCAATAGTGAAGCCACAGATGTATTGAAGAGTTAGTTCCCGCGGGTGCCTACTGCCTCGGA	Pool_11
2189	FANCG.2125	TGCTGTTGACAGTGAGCGACCCAGGTAATCGAGACACTTATAGTGAAGCCACAGATGTATAAGTGTCTCGATTACCTGGGCTGCCTACTGCCTCGGA	Pool_11
2189	FANCG.2611	TGCTGTTGACAGTGAGCGATCGAGTAAAATTTCATATTTATAGTGAAGCCACAGATGTATAAATATGAAATTTTACTCGACTGCCTACTGCCTCGGA	Pool_11
2189	FANCG.2443	TGCTGTTGACAGTGAGCGCAGGAATGTGACCATTCCTATATAGTGAAGCCACAGATGTATATAGGAATGGTCACATTCCTATGCCTACTGCCTCGGA	Pool_11
2189	FANCG.1448	TGCTGTTGACAGTGAGCGACCGCAGTTTCTCATTGAGGTATAGTGAAGCCACAGATGTATACCTCAATGAGAAACTGCGGGTGCCTACTGCCTCGGA	Pool_11
2305	FOXM1.1812	TGCTGTTGACAGTGAGCGATCGGAAATGCTTGTGATTCAATAGTGAAGCCACAGATGTATTGAATCACAAGCATTTCCGAGTGCCTACTGCCTCGGA	Pool_11
2305	FOXM1.711	TGCTGTTGACAGTGAGCGCAGGGATGTGAATCTTCCTAGATAGTGAAGCCACAGATGTATCTAGGAAGATTCACATCCCTATGCCTACTGCCTCGGA	Pool_11
2305	FOXM1.3444	TGCTGTTGACAGTGAGCGAAACACTAACTACTCAATAAAATAGTGAAGCCACAGATGTATTTTATTGAGTAGTTAGTGTTCTGCCTACTGCCTCGGA	Pool_11
2305	FOXM1.787	TGCTGTTGACAGTGAGCGACAGGCTGCACTATCAACAATATAGTGAAGCCACAGATGTATATTGTTGATAGTGCAGCCTGCTGCCTACTGCCTCGGA	Pool_11
2305	FOXM1.445	TGCTGTTGACAGTGAGCGACAGCTGGGATCAAGATTATTATAGTGAAGCCACAGATGTATAATAATCTTGATCCCAGCTGGTGCCTACTGCCTCGGA	Pool_11
2305	FOXM1.1274	TGCTGTTGACAGTGAGCGCCCGCCGGAACATGACCATCAATAGTGAAGCCACAGATGTATTGATGGTCATGTTCCGGCGGATGCCTACTGCCTCGGA	Pool_11
51512	GTSE1.3056	TGCTGTTGACAGTGAGCGCTAGTTAGATATTCTAGATTTATAGTGAAGCCACAGATGTATAAATCTAGAATATCTAACTATTGCCTACTGCCTCGGA	Pool_11
51512	GTSE1.1039	TGCTGTTGACAGTGAGCGACGGGATGTTCTCCCTGACAAATAGTGAAGCCACAGATGTATTTGTCAGGGAGAACATCCCGGTGCCTACTGCCTCGGA	Pool_11
51512	GTSE1.2799	TGCTGTTGACAGTGAGCGCAAGAAACATGTTTTAGTAGAATAGTGAAGCCACAGATGTATTCTACTAAAACATGTTTCTTTTGCCTACTGCCTCGGA	Pool_11
51512	GTSE1.2463	TGCTGTTGACAGTGAGCGCCAGCCCTAAAGTGGTTTTCAATAGTGAAGCCACAGATGTATTGAAAACCACTTTAGGGCTGTTGCCTACTGCCTCGGA	Pool_11
51512	GTSE1.1562	TGCTGTTGACAGTGAGCGCGACGGCGAGATTCCTGTCTAATAGTGAAGCCACAGATGTATTAGACAGGAATCTCGCCGTCTTGCCTACTGCCTCGGA	Pool_11
51512	GTSE1.2424	TGCTGTTGACAGTGAGCGCCAAGTTCTAAGCCGAACCAAATAGTGAAGCCACAGATGTATTTGGTTCGGCTTAGAACTTGATGCCTACTGCCTCGGA	Pool_11
3146	HMGB1.2309	TGCTGTTGACAGTGAGCGCGAGGTTTTAAATACTAGTTAATAGTGAAGCCACAGATGTATTAACTAGTATTTAAAACCTCTTGCCTACTGCCTCGGA	Pool_11
3146	HMGB1.2683	TGCTGTTGACAGTGAGCGCTAGATGGAAGTTTCTACTGTATAGTGAAGCCACAGATGTATACAGTAGAAACTTCCATCTAATGCCTACTGCCTCGGA	Pool_11
3146	HMGB1.1726	TGCTGTTGACAGTGAGCGCAAGCGTGAGCTTAAAATACAATAGTGAAGCCACAGATGTATTGTATTTTAAGCTCACGCTTTTGCCTACTGCCTCGGA	Pool_11
3146	HMGB1.1534	TGCTGTTGACAGTGAGCGAAAGAGTAATCAATCTACTCAATAGTGAAGCCACAGATGTATTGAGTAGATTGATTACTCTTCTGCCTACTGCCTCGGA	Pool_11
3146	HMGB1.2936	TGCTGTTGACAGTGAGCGACCCTAGAAGTTGGATGTCTAATAGTGAAGCCACAGATGTATTAGACATCCAACTTCTAGGGGTGCCTACTGCCTCGGA	Pool_11
3146	HMGB1.3100	TGCTGTTGACAGTGAGCGCCAAGAAAAGACTAAATCTATATAGTGAAGCCACAGATGTATATAGATTTAGTCTTTTCTTGATGCCTACTGCCTCGGA	Pool_11
3428	IFI16.306	TGCTGTTGACAGTGAGCGCCAAGAACATTGTTCTACTAAATAGTGAAGCCACAGATGTATTTAGTAGAACAATGTTCTTGTTGCCTACTGCCTCGGA	Pool_11
3428	IFI16.52	TGCTGTTGACAGTGAGCGACAGCACTAGTCAGCTAACTAATAGTGAAGCCACAGATGTATTAGTTAGCTGACTAGTGCTGGTGCCTACTGCCTCGGA	Pool_11
3428	IFI16.304	TGCTGTTGACAGTGAGCGCTACAAGAACATTGTTCTACTATAGTGAAGCCACAGATGTATAGTAGAACAATGTTCTTGTATTGCCTACTGCCTCGGA	Pool_11
3428	IFI16.1198	TGCTGTTGACAGTGAGCGAAAGATTGATATTCTTCACAAATAGTGAAGCCACAGATGTATTTGTGAAGAATATCAATCTTCTGCCTACTGCCTCGGA	Pool_11
3428	IFI16.1032	TGCTGTTGACAGTGAGCGACAGCTTGAAGGAGAAATTCAATAGTGAAGCCACAGATGTATTGAATTTCTCCTTCAAGCTGGTGCCTACTGCCTCGGA	Pool_11
3428	IFI16.307	TGCTGTTGACAGTGAGCGAAAGAACATTGTTCTACTAAAATAGTGAAGCCACAGATGTATTTTAGTAGAACAATGTTCTTGTGCCTACTGCCTCGGA	Pool_11
3835	KIF22.1114	TGCTGTTGACAGTGAGCGACAGGTCCAAGGAGGTGATCAATAGTGAAGCCACAGATGTATTGATCACCTCCTTGGACCTGGTGCCTACTGCCTCGGA	Pool_11
3835	KIF22.326	TGCTGTTGACAGTGAGCGACAGGACATCTATGCAGGTTCATAGTGAAGCCACAGATGTATGAACCTGCATAGATGTCCTGCTGCCTACTGCCTCGGA	Pool_11
3835	KIF22.544	TGCTGTTGACAGTGAGCGACATGTCTTACCTAGAGATCTATAGTGAAGCCACAGATGTATAGATCTCTAGGTAAGACATGGTGCCTACTGCCTCGGA	Pool_11
3835	KIF22.1474	TGCTGTTGACAGTGAGCGCGAGGCTTAAGACGAAGCAAAATAGTGAAGCCACAGATGTATTTTGCTTCGTCTTAAGCCTCTTGCCTACTGCCTCGGA	Pool_11
3835	KIF22.1423	TGCTGTTGACAGTGAGCGAAGAGCGGATGGTGCTAATGAATAGTGAAGCCACAGATGTATTCATTAGCACCATCCGCTCTCTGCCTACTGCCTCGGA	Pool_11
3835	KIF22.1177	TGCTGTTGACAGTGAGCGAACCTGTTAAGCTGTCTCAGAATAGTGAAGCCACAGATGTATTCTGAGACAGCTTAACAGGTCTGCCTACTGCCTCGGA	Pool_11
3978	LIG1.1384	TGCTGTTGACAGTGAGCGACAAGAAGATAGACATCATCAATAGTGAAGCCACAGATGTATTGATGATGTCTATCTTCTTGGTGCCTACTGCCTCGGA	Pool_11
3978	LIG1.1385	TGCTGTTGACAGTGAGCGAAAGAAGATAGACATCATCAAATAGTGAAGCCACAGATGTATTTGATGATGTCTATCTTCTTGTGCCTACTGCCTCGGA	Pool_11
3978	LIG1.1882	TGCTGTTGACAGTGAGCGCCAGCAGGAATCAGGAAGACAATAGTGAAGCCACAGATGTATTGTCTTCCTGATTCCTGCTGATGCCTACTGCCTCGGA	Pool_11
3978	LIG1.3048	TGCTGTTGACAGTGAGCGCCCCGTCATTTCTTTCAATAAATAGTGAAGCCACAGATGTATTTATTGAAAGAAATGACGGGATGCCTACTGCCTCGGA	Pool_11
3978	LIG1.1000	TGCTGTTGACAGTGAGCGACCGGACGTTTGAGAAGATCGATAGTGAAGCCACAGATGTATCGATCTTCTCAAACGTCCGGGTGCCTACTGCCTCGGA	Pool_11
3978	LIG1.2812	TGCTGTTGACAGTGAGCGCCCGGAAGCAAAGTCAGATTCATAGTGAAGCCACAGATGTATGAATCTGACTTTGCTTCCGGTTGCCTACTGCCTCGGA	Pool_11
4176	MCM7.1879	TGCTGTTGACAGTGAGCGCCAGGCTAATGGAGATGTCAAATAGTGAAGCCACAGATGTATTTGACATCTCCATTAGCCTGATGCCTACTGCCTCGGA	Pool_11
4176	MCM7.880	TGCTGTTGACAGTGAGCGCTCGGATTGTGAAGATGAACAATAGTGAAGCCACAGATGTATTGTTCATCTTCACAATCCGATTGCCTACTGCCTCGGA	Pool_11
4176	MCM7.8	TGCTGTTGACAGTGAGCGCAAGGTTAAGAAGTTCTTACAATAGTGAAGCCACAGATGTATTGTAAGAACTTCTTAACCTTTTGCCTACTGCCTCGGA	Pool_11
4176	MCM7.52	TGCTGTTGACAGTGAGCGCCGGGAAGAAGCAGTTCAAGTATAGTGAAGCCACAGATGTATACTTGAACTGCTTCTTCCCGATGCCTACTGCCTCGGA	Pool_11
4176	MCM7.674	TGCTGTTGACAGTGAGCGACAGGAGATGAAGATGCAAGAATAGTGAAGCCACAGATGTATTCTTGCATCTTCATCTCCTGGTGCCTACTGCCTCGGA	Pool_11
4176	MCM7.16	TGCTGTTGACAGTGAGCGCGAAGTTCTTACAAGAGTTCTATAGTGAAGCCACAGATGTATAGAACTCTTGTAAGAACTTCTTGCCTACTGCCTCGGA	Pool_11
254394	MCM9.632	TGCTGTTGACAGTGAGCGCCAGGAACAGGTTCAAAGGCTATAGTGAAGCCACAGATGTATAGCCTTTGAACCTGTTCCTGATGCCTACTGCCTCGGA	Pool_11
254394	MCM9.469	TGCTGTTGACAGTGAGCGACAAGCATGTGTTTGTGATCAATAGTGAAGCCACAGATGTATTGATCACAAACACATGCTTGCTGCCTACTGCCTCGGA	Pool_11
254394	MCM9.446	TGCTGTTGACAGTGAGCGACGGGATTACATGTGTAACAAATAGTGAAGCCACAGATGTATTTGTTACACATGTAATCCCGCTGCCTACTGCCTCGGA	Pool_11
254394	MCM9.6	TGCTGTTGACAGTGAGCGCTACCTAGATTCAAGATGAATATAGTGAAGCCACAGATGTATATTCATCTTGAATCTAGGTAATGCCTACTGCCTCGGA	Pool_11
254394	MCM9.1087	TGCTGTTGACAGTGAGCGAAGGGAAATCTCAGTTCCTCAATAGTGAAGCCACAGATGTATTGAGGAACTGAGATTTCCCTGTGCCTACTGCCTCGGA	Pool_11
254394	MCM9.299	TGCTGTTGACAGTGAGCGCCAGAATCTTCATGCCAGGATATAGTGAAGCCACAGATGTATATCCTGGCATGAAGATTCTGTTGCCTACTGCCTCGGA	Pool_11
4292	MLH1.1212	TGCTGTTGACAGTGAGCGCCGGGAAGATTCTGATGTGGAATAGTGAAGCCACAGATGTATTCCACATCAGAATCTTCCCGATGCCTACTGCCTCGGA	Pool_11
4292	MLH1.355	TGCTGTTGACAGTGAGCGACAGGCATTAGTTTCTCAGTTATAGTGAAGCCACAGATGTATAACTGAGAAACTAATGCCTGCTGCCTACTGCCTCGGA	Pool_11
4292	MLH1.356	TGCTGTTGACAGTGAGCGAAGGCATTAGTTTCTCAGTTAATAGTGAAGCCACAGATGTATTAACTGAGAAACTAATGCCTGTGCCTACTGCCTCGGA	Pool_11
4292	MLH1.2111	TGCTGTTGACAGTGAGCGCCCGATACAAAGTGTTGTATCATAGTGAAGCCACAGATGTATGATACAACACTTTGTATCGGATGCCTACTGCCTCGGA	Pool_11
4292	MLH1.2132	TGCTGTTGACAGTGAGCGCAAGTGTGATATACAAAGTGTATAGTGAAGCCACAGATGTATACACTTTGTATATCACACTTTTGCCTACTGCCTCGGA	Pool_11
4292	MLH1.2216	TGCTGTTGACAGTGAGCGCCAGTGGATTGATTATAAATAATAGTGAAGCCACAGATGTATTATTTATAATCAATCCACTGTTGCCTACTGCCTCGGA	Pool_11
4332	MNDA.1167	TGCTGTTGACAGTGAGCGCTGGGTTGTTTATGTTACAAAATAGTGAAGCCACAGATGTATTTTGTAACATAAACAACCCATTGCCTACTGCCTCGGA	Pool_11
4332	MNDA.104	TGCTGTTGACAGTGAGCGCACGGACAGTGATTCTGTCCTATAGTGAAGCCACAGATGTATAGGACAGAATCACTGTCCGTATGCCTACTGCCTCGGA	Pool_11
4332	MNDA.1365	TGCTGTTGACAGTGAGCGCCAGCTTCATCAAGGTCATCAATAGTGAAGCCACAGATGTATTGATGACCTTGATGAAGCTGTTGCCTACTGCCTCGGA	Pool_11
4332	MNDA.457	TGCTGTTGACAGTGAGCGAAAGTCAAAAGTTGCTAAGAAATAGTGAAGCCACAGATGTATTTCTTAGCAACTTTTGACTTCTGCCTACTGCCTCGGA	Pool_11
4332	MNDA.1433	TGCTGTTGACAGTGAGCGCAAGCTGAAATGCAACAAACAATAGTGAAGCCACAGATGTATTGTTTGTTGCATTTCAGCTTTTGCCTACTGCCTCGGA	Pool_11
4332	MNDA.1119	TGCTGTTGACAGTGAGCGATCCCAAGATCAGTCAACTTTATAGTGAAGCCACAGATGTATAAAGTTGACTGATCTTGGGAGTGCCTACTGCCTCGGA	Pool_11
2956	MSH6.2742	TGCTGTTGACAGTGAGCGCAGGATTCAAAGTAATGTGTAATAGTGAAGCCACAGATGTATTACACATTACTTTGAATCCTTTGCCTACTGCCTCGGA	Pool_11
2956	MSH6.2569	TGCTGTTGACAGTGAGCGATCCGAAGTTGTAGAGCTTCTATAGTGAAGCCACAGATGTATAGAAGCTCTACAACTTCGGAGTGCCTACTGCCTCGGA	Pool_11
2956	MSH6.805	TGCTGTTGACAGTGAGCGCAAGAGTGAAGAAGATAATGAATAGTGAAGCCACAGATGTATTCATTATCTTCTTCACTCTTATGCCTACTGCCTCGGA	Pool_11
2956	MSH6.2570	TGCTGTTGACAGTGAGCGCCCGAAGTTGTAGAGCTTCTAATAGTGAAGCCACAGATGTATTAGAAGCTCTACAACTTCGGATGCCTACTGCCTCGGA	Pool_11
2956	MSH6.3908	TGCTGTTGACAGTGAGCGCTAGTAGAAGATTATTCTCAAATAGTGAAGCCACAGATGTATTTGAGAATAATCTTCTACTAATGCCTACTGCCTCGGA	Pool_11
2956	MSH6.3222	TGCTGTTGACAGTGAGCGCACGGAGGGATGTATCATTGAATAGTGAAGCCACAGATGTATTCAATGATACATCCCTCCGTTTGCCTACTGCCTCGGA	Pool_11
55247	NEIL3.1471	TGCTGTTGACAGTGAGCGATACAATCAGTTCAGAATCTAATAGTGAAGCCACAGATGTATTAGATTCTGAACTGATTGTAGTGCCTACTGCCTCGGA	Pool_11
55247	NEIL3.641	TGCTGTTGACAGTGAGCGACGGATGCTAGGTGATGTGCTATAGTGAAGCCACAGATGTATAGCACATCACCTAGCATCCGGTGCCTACTGCCTCGGA	Pool_11
55247	NEIL3.734	TGCTGTTGACAGTGAGCGACCAGCTGTTAAAGTTTGTCAATAGTGAAGCCACAGATGTATTGACAAACTTTAACAGCTGGGTGCCTACTGCCTCGGA	Pool_11
55247	NEIL3.993	TGCTGTTGACAGTGAGCGATACCGACTAGAAATACTATAATAGTGAAGCCACAGATGTATTATAGTATTTCTAGTCGGTAGTGCCTACTGCCTCGGA	Pool_11
55247	NEIL3.519	TGCTGTTGACAGTGAGCGCCAGTAGAACTCAGAAACTCAATAGTGAAGCCACAGATGTATTGAGTTTCTGAGTTCTACTGATGCCTACTGCCTCGGA	Pool_11
55247	NEIL3.608	TGCTGTTGACAGTGAGCGAAGAGCAGAAAGTGAAGTTAAATAGTGAAGCCACAGATGTATTTAACTTCACTTTCTGCTCTCTGCCTACTGCCTCGGA	Pool_11
25836	NIPBL.5041	TGCTGTTGACAGTGAGCGACAGAAGAAGATTCAAATAAAATAGTGAAGCCACAGATGTATTTTATTTGAATCTTCTTCTGCTGCCTACTGCCTCGGA	Pool_11
25836	NIPBL.3193	TGCTGTTGACAGTGAGCGAAAGGAGATTCTAATAAATCAATAGTGAAGCCACAGATGTATTGATTTATTAGAATCTCCTTGTGCCTACTGCCTCGGA	Pool_11
25836	NIPBL.3275	TGCTGTTGACAGTGAGCGCCAAGAGTAAAGTAGACACTAATAGTGAAGCCACAGATGTATTAGTGTCTACTTTACTCTTGTTGCCTACTGCCTCGGA	Pool_11
25836	NIPBL.1981	TGCTGTTGACAGTGAGCGCAAGAAGTTCAAGATAAAGATATAGTGAAGCCACAGATGTATATCTTTATCTTGAACTTCTTTTGCCTACTGCCTCGGA	Pool_11
25836	NIPBL.8041	TGCTGTTGACAGTGAGCGCCAGATTCAGAAGACGATATAATAGTGAAGCCACAGATGTATTATATCGTCTTCTGAATCTGATGCCTACTGCCTCGGA	Pool_11
25836	NIPBL.3501	TGCTGTTGACAGTGAGCGCAAGCCTGTAGTTGTGCTACAATAGTGAAGCCACAGATGTATTGTAGCACAACTACAGGCTTATGCCTACTGCCTCGGA	Pool_11
4869	NPM1.323	TGCTGTTGACAGTGAGCGACCGACAAAGATTATCACTTTATAGTGAAGCCACAGATGTATAAAGTGATAATCTTTGTCGGCTGCCTACTGCCTCGGA	Pool_11
4869	NPM1.888	TGCTGTTGACAGTGAGCGATAGTTCTGTAGAAGACATTAATAGTGAAGCCACAGATGTATTAATGTCTTCTACAGAACTAGTGCCTACTGCCTCGGA	Pool_11
4869	NPM1.343	TGCTGTTGACAGTGAGCGCAAGGTGGATAATGATGAAAATTAGTGAAGCCACAGATGTAATTTTCATCATTATCCACCTTATGCCTACTGCCTCGGA	Pool_11
4869	NPM1.409	TGCTGTTGACAGTGAGCGCAAGGATGAGTTGCACATTGTTTAGTGAAGCCACAGATGTAAACAATGTGCAACTCATCCTTTTGCCTACTGCCTCGGA	Pool_11
4869	NPM1.452	TGCTGTTGACAGTGAGCGAAAGGCAGTCCAATTAAAGTAATAGTGAAGCCACAGATGTATTACTTTAATTGGACTGCCTTCTGCCTACTGCCTCGGA	Pool_11
4869	NPM1.104	TGCTGTTGACAGTGAGCGATCGCGAGATCTTCAGGGTCTATAGTGAAGCCACAGATGTATAGACCCTGAAGATCTCGCGAGTGCCTACTGCCTCGGA	Pool_11
26471	NUPR1.762	TGCTGTTGACAGTGAGCGACCAGAAAAGAAAGCTACAGAATAGTGAAGCCACAGATGTATTCTGTAGCTTTCTTTTCTGGGTGCCTACTGCCTCGGA	Pool_11
26471	NUPR1.208	TGCTGTTGACAGTGAGCGAAGGAAAGCAGAGACAGACAAATAGTGAAGCCACAGATGTATTTGTCTGTCTCTGCTTTCCTGTGCCTACTGCCTCGGA	Pool_11
26471	NUPR1.460	TGCTGTTGACAGTGAGCGCCGAGAGGAAACTGGTGACCAATAGTGAAGCCACAGATGTATTGGTCACCAGTTTCCTCTCGTTGCCTACTGCCTCGGA	Pool_11
26471	NUPR1.220	TGCTGTTGACAGTGAGCGAACAGACAAAGCGTTAGGAGAATAGTGAAGCCACAGATGTATTCTCCTAACGCTTTGTCTGTCTGCCTACTGCCTCGGA	Pool_11
26471	NUPR1.551	TGCTGTTGACAGTGAGCGCTGGACACTACACCCAGCAATATAGTGAAGCCACAGATGTATATTGCTGGGTGTAGTGTCCATTGCCTACTGCCTCGGA	Pool_11
26471	NUPR1.227	TGCTGTTGACAGTGAGCGCAAGCGTTAGGAGAAGAAGAGATAGTGAAGCCACAGATGTATCTCTTCTTCTCCTAACGCTTTTGCCTACTGCCTCGGA	Pool_11
143	PARP4.1887	TGCTGTTGACAGTGAGCGCAAGGTTGAAGATTACCAGTTATAGTGAAGCCACAGATGTATAACTGGTAATCTTCAACCTTTTGCCTACTGCCTCGGA	Pool_11
143	PARP4.4709	TGCTGTTGACAGTGAGCGCCAGCTGCTTTTTACAAATAAATAGTGAAGCCACAGATGTATTTATTTGTAAAAAGCAGCTGTTGCCTACTGCCTCGGA	Pool_11
143	PARP4.2277	TGCTGTTGACAGTGAGCGCAAGGCTAAGGTTCTTATAAAATAGTGAAGCCACAGATGTATTTTATAAGAACCTTAGCCTTATGCCTACTGCCTCGGA	Pool_11
143	PARP4.1061	TGCTGTTGACAGTGAGCGCAAAGATGATGACAGAGTTTTATAGTGAAGCCACAGATGTATAAAACTCTGTCATCATCTTTTTGCCTACTGCCTCGGA	Pool_11
143	PARP4.704	TGCTGTTGACAGTGAGCGAAAGACAGTTTGCTATAAAGAATAGTGAAGCCACAGATGTATTCTTTATAGCAAACTGTCTTCTGCCTACTGCCTCGGA	Pool_11
143	PARP4.3169	TGCTGTTGACAGTGAGCGACCGGAGTATTTGAATATTTTATAGTGAAGCCACAGATGTATAAAATATTCAAATACTCCGGCTGCCTACTGCCTCGGA	Pool_11
22976	PAXIP1.3385	TGCTGTTGACAGTGAGCGACAGGAAGACAGATATAATAAATAGTGAAGCCACAGATGTATTTATTATATCTGTCTTCCTGCTGCCTACTGCCTCGGA	Pool_11
22976	PAXIP1.1443	TGCTGTTGACAGTGAGCGCCAGCTACAGTTTCCACAGCAATAGTGAAGCCACAGATGTATTGCTGTGGAAACTGTAGCTGTTGCCTACTGCCTCGGA	Pool_11
22976	PAXIP1.2509	TGCTGTTGACAGTGAGCGACAGAGTTGTTGATGAGTATAATAGTGAAGCCACAGATGTATTATACTCATCAACAACTCTGCTGCCTACTGCCTCGGA	Pool_11
22976	PAXIP1.1422	TGCTGTTGACAGTGAGCGCCCGCATCAGTTTTCACAGCAATAGTGAAGCCACAGATGTATTGCTGTGAAAACTGATGCGGATGCCTACTGCCTCGGA	Pool_11
22976	PAXIP1.152	TGCTGTTGACAGTGAGCGCAGCGAAGGAAGTTTCCTACAATAGTGAAGCCACAGATGTATTGTAGGAAACTTCCTTCGCTTTGCCTACTGCCTCGGA	Pool_11
22976	PAXIP1.2078	TGCTGTTGACAGTGAGCGCCACAGTCTTAAAGAAGAAGAATAGTGAAGCCACAGATGTATTCTTCTTCTTTAAGACTGTGTTGCCTACTGCCTCGGA	Pool_11
5347	PLK1.837	TGCTGTTGACAGTGAGCGCCCGGATCAAGAAGAATGAATATAGTGAAGCCACAGATGTATATTCATTCTTCTTGATCCGGATGCCTACTGCCTCGGA	Pool_11
5347	PLK1.2084	TGCTGTTGACAGTGAGCGACACCATATGAATTGTACAGAATAGTGAAGCCACAGATGTATTCTGTACAATTCATATGGTGGTGCCTACTGCCTCGGA	Pool_11
5347	PLK1.900	TGCTGTTGACAGTGAGCGCCCAGAAGATGCTTCAGACAGATAGTGAAGCCACAGATGTATCTGTCTGAAGCATCTTCTGGATGCCTACTGCCTCGGA	Pool_11
5347	PLK1.1189	TGCTGTTGACAGTGAGCGACAGCAGCTGCACAGTGTCAATTAGTGAAGCCACAGATGTAATTGACACTGTGCAGCTGCTGCTGCCTACTGCCTCGGA	Pool_11
5347	PLK1.291	TGCTGTTGACAGTGAGCGCCGCGGGCAAGATTGTGCCTAATAGTGAAGCCACAGATGTATTAGGCACAATCTTGCCCGCGATGCCTACTGCCTCGGA	Pool_11
5347	PLK1.2152	TGCTGTTGACAGTGAGCGCTAAACAGATGTGAATATTCAATAGTGAAGCCACAGATGTATTGAATATTCACATCTGTTTAATGCCTACTGCCTCGGA	Pool_11
5424	POLD1.2232	TGCTGTTGACAGTGAGCGATCAGATGATCGAGAAAACCAATAGTGAAGCCACAGATGTATTGGTTTTCTCGATCATCTGACTGCCTACTGCCTCGGA	Pool_11
5424	POLD1.348	TGCTGTTGACAGTGAGCGCACAGTTGGAGATTGACCATTATAGTGAAGCCACAGATGTATAATGGTCAATCTCCAACTGTTTGCCTACTGCCTCGGA	Pool_11
5424	POLD1.2226	TGCTGTTGACAGTGAGCGCCGGACGTCAGATGATCGAGAATAGTGAAGCCACAGATGTATTCTCGATCATCTGACGTCCGATGCCTACTGCCTCGGA	Pool_11
5424	POLD1.639	TGCTGTTGACAGTGAGCGACCGAGAGAGCATGTTTGGGTATAGTGAAGCCACAGATGTATACCCAAACATGCTCTCTCGGGTGCCTACTGCCTCGGA	Pool_11
5424	POLD1.349	TGCTGTTGACAGTGAGCGCCAGTTGGAGATTGACCATTATTAGTGAAGCCACAGATGTAATAATGGTCAATCTCCAACTGTTGCCTACTGCCTCGGA	Pool_11
5424	POLD1.1236	TGCTGTTGACAGTGAGCGCCACCGGTTACAACATCCAGAATAGTGAAGCCACAGATGTATTCTGGATGTTGTAACCGGTGATGCCTACTGCCTCGGA	Pool_11
11201	POLI.5098	TGCTGTTGACAGTGAGCGCCAGCTCGAGTTTGTTGTTGTTTAGTGAAGCCACAGATGTAAACAACAACAAACTCGAGCTGATGCCTACTGCCTCGGA	Pool_11
11201	POLI.1675	TGCTGTTGACAGTGAGCGCCCAGTAGATATTCAAGAAGAATAGTGAAGCCACAGATGTATTCTTCTTGAATATCTACTGGATGCCTACTGCCTCGGA	Pool_11
11201	POLI.408	TGCTGTTGACAGTGAGCGATCCACAGTTGGTATTAGTTAATAGTGAAGCCACAGATGTATTAACTAATACCAACTGTGGACTGCCTACTGCCTCGGA	Pool_11
11201	POLI.5001	TGCTGTTGACAGTGAGCGCCAGGCAGATGCTGTTAGCTATTAGTGAAGCCACAGATGTAATAGCTAACAGCATCTGCCTGTTGCCTACTGCCTCGGA	Pool_11
11201	POLI.4414	TGCTGTTGACAGTGAGCGATAGGACTGTATACAAATGATATAGTGAAGCCACAGATGTATATCATTTGTATACAGTCCTAGTGCCTACTGCCTCGGA	Pool_11
11201	POLI.5287	TGCTGTTGACAGTGAGCGAAAGATCTAGTGTTTTGTACTATAGTGAAGCCACAGATGTATAGTACAAAACACTAGATCTTGTGCCTACTGCCTCGGA	Pool_11
5433	POLR2D.1498	TGCTGTTGACAGTGAGCGACACCTCCAAGATAACAAAGAATAGTGAAGCCACAGATGTATTCTTTGTTATCTTGGAGGTGCTGCCTACTGCCTCGGA	Pool_11
5433	POLR2D.1708	TGCTGTTGACAGTGAGCGACAGGCTGGATGTGAAGCTACATAGTGAAGCCACAGATGTATGTAGCTTCACATCCAGCCTGGTGCCTACTGCCTCGGA	Pool_11
5433	POLR2D.888	TGCTGTTGACAGTGAGCGCCCAGTTTTACCTAGATACTAATAGTGAAGCCACAGATGTATTAGTATCTAGGTAAAACTGGTTGCCTACTGCCTCGGA	Pool_11
5433	POLR2D.859	TGCTGTTGACAGTGAGCGACAGAAGATAGTAGACTTTATATAGTGAAGCCACAGATGTATATAAAGTCTACTATCTTCTGGTGCCTACTGCCTCGGA	Pool_11
5433	POLR2D.889	TGCTGTTGACAGTGAGCGACAGTTTTACCTAGATACTAAATAGTGAAGCCACAGATGTATTTAGTATCTAGGTAAAACTGGTGCCTACTGCCTCGGA	Pool_11
5433	POLR2D.899	TGCTGTTGACAGTGAGCGATAGATACTAAAGGAAGAATTATAGTGAAGCCACAGATGTATAATTCTTCCTTTAGTATCTAGTGCCTACTGCCTCGGA	Pool_11
5689	PSMB1.751	TGCTGTTGACAGTGAGCGCCCGGATCTGCATAGTGACCAATAGTGAAGCCACAGATGTATTGGTCACTATGCAGATCCGGATGCCTACTGCCTCGGA	Pool_11
5689	PSMB1.378	TGCTGTTGACAGTGAGCGAAAGCAAGACTAAAGATGTATATAGTGAAGCCACAGATGTATATACATCTTTAGTCTTGCTTCTGCCTACTGCCTCGGA	Pool_11
5689	PSMB1.878	TGCTGTTGACAGTGAGCGCTGGATGGTTTTGTTTATTAAATAGTGAAGCCACAGATGTATTTAATAAACAAAACCATCCAATGCCTACTGCCTCGGA	Pool_11
5689	PSMB1.466	TGCTGTTGACAGTGAGCGAAAGGCGCTTCTTTCCATACTATAGTGAAGCCACAGATGTATAGTATGGAAAGAAGCGCCTTGTGCCTACTGCCTCGGA	Pool_11
5689	PSMB1.379	TGCTGTTGACAGTGAGCGCAGCAAGACTAAAGATGTATAATAGTGAAGCCACAGATGTATTATACATCTTTAGTCTTGCTTTGCCTACTGCCTCGGA	Pool_11
5689	PSMB1.359	TGCTGTTGACAGTGAGCGCACGCTGACAAAGATTATTGAATAGTGAAGCCACAGATGTATTCAATAATCTTTGTCAGCGTATGCCTACTGCCTCGGA	Pool_11
5719	PSMD13.1429	TGCTGTTGACAGTGAGCGCCAGACTGTTCTTGCTCTAAAATAGTGAAGCCACAGATGTATTTTAGAGCAAGAACAGTCTGTTGCCTACTGCCTCGGA	Pool_11
5719	PSMD13.649	TGCTGTTGACAGTGAGCGCCCAGTAAATACTATCAAACAATAGTGAAGCCACAGATGTATTGTTTGATAGTATTTACTGGATGCCTACTGCCTCGGA	Pool_11
5719	PSMD13.1645	TGCTGTTGACAGTGAGCGACGGTTTGAGAATGTTCCTATATAGTGAAGCCACAGATGTATATAGGAACATTCTCAAACCGCTGCCTACTGCCTCGGA	Pool_11
5719	PSMD13.1428	TGCTGTTGACAGTGAGCGCACAGACTGTTCTTGCTCTAAATAGTGAAGCCACAGATGTATTTAGAGCAAGAACAGTCTGTATGCCTACTGCCTCGGA	Pool_11
5719	PSMD13.425	TGCTGTTGACAGTGAGCGCTAGACAGATGACTGATCCTAATAGTGAAGCCACAGATGTATTAGGATCAGTCATCTGTCTAATGCCTACTGCCTCGGA	Pool_11
5719	PSMD13.621	TGCTGTTGACAGTGAGCGCTCGGTTCACAGTCGTTTCTATTAGTGAAGCCACAGATGTAATAGAAACGACTGTGAACCGATTGCCTACTGCCTCGGA	Pool_11
5715	PSMD9.716	TGCTGTTGACAGTGAGCGACAGCTTAGACTTGTTCCAACATAGTGAAGCCACAGATGTATGTTGGAACAAGTCTAAGCTGGTGCCTACTGCCTCGGA	Pool_11
5715	PSMD9.1064	TGCTGTTGACAGTGAGCGACAGGTACTGGTGTGATTATTATAGTGAAGCCACAGATGTATAATAATCACACCAGTACCTGCTGCCTACTGCCTCGGA	Pool_11
5715	PSMD9.1536	TGCTGTTGACAGTGAGCGACAGTGTCGTGATCAAGGTTCATAGTGAAGCCACAGATGTATGAACCTTGATCACGACACTGCTGCCTACTGCCTCGGA	Pool_11
5715	PSMD9.1853	TGCTGTTGACAGTGAGCGAAACGAGTAGATCAGACCTCTTTAGTGAAGCCACAGATGTAAAGAGGTCTGATCTACTCGTTCTGCCTACTGCCTCGGA	Pool_11
5715	PSMD9.2306	TGCTGTTGACAGTGAGCGCAAAGTCTCAGACTATAATAAATAGTGAAGCCACAGATGTATTTATTATAGTCTGAGACTTTATGCCTACTGCCTCGGA	Pool_11
5715	PSMD9.2130	TGCTGTTGACAGTGAGCGCGCCACAGGTTCTCACACTCAATAGTGAAGCCACAGATGTATTGAGTGTGAGAACCTGTGGCTTGCCTACTGCCTCGGA	Pool_11
5720	PSME1.135	TGCTGTTGACAGTGAGCGAAAGGTGGATGTGTTTCGTGAATAGTGAAGCCACAGATGTATTCACGAAACACATCCACCTTGTGCCTACTGCCTCGGA	Pool_11
5720	PSME1.967	TGCTGTTGACAGTGAGCGCCAGGCACAATAAATATAGTTATAGTGAAGCCACAGATGTATAACTATATTTATTGTGCCTGATGCCTACTGCCTCGGA	Pool_11
5720	PSME1.299	TGCTGTTGACAGTGAGCGCTCCAGTCAAGGAGAAAGAGAATAGTGAAGCCACAGATGTATTCTCTTTCTCCTTGACTGGATTGCCTACTGCCTCGGA	Pool_11
5720	PSME1.300	TGCTGTTGACAGTGAGCGCCCAGTCAAGGAGAAAGAGAAATAGTGAAGCCACAGATGTATTTCTCTTTCTCCTTGACTGGATGCCTACTGCCTCGGA	Pool_11
5720	PSME1.339	TGCTGTTGACAGTGAGCGACAGGAGAAGGAAGACAAGGATTAGTGAAGCCACAGATGTAATCCTTGTCTTCCTTCTCCTGCTGCCTACTGCCTCGGA	Pool_11
5720	PSME1.231	TGCTGTTGACAGTGAGCGCAAGGAGCCAGCTCTCAATGAATAGTGAAGCCACAGATGTATTCATTGAGAGCTGGCTCCTTTTGCCTACTGCCTCGGA	Pool_11
9491	PSMF1.3105	TGCTGTTGACAGTGAGCGCTAGCAGCTTTATTGAGATATATAGTGAAGCCACAGATGTATATATCTCAATAAAGCTGCTATTGCCTACTGCCTCGGA	Pool_11
9491	PSMF1.1151	TGCTGTTGACAGTGAGCGATCGACCAGATGCAGTGCTATATAGTGAAGCCACAGATGTATATAGCACTGCATCTGGTCGAGTGCCTACTGCCTCGGA	Pool_11
9491	PSMF1.3000	TGCTGTTGACAGTGAGCGAAAGGAGCAAGTTGGAGTGTTTTAGTGAAGCCACAGATGTAAAACACTCCAACTTGCTCCTTGTGCCTACTGCCTCGGA	Pool_11
9491	PSMF1.2485	TGCTGTTGACAGTGAGCGCCAGGCAGAGGTGCAGATTCAATAGTGAAGCCACAGATGTATTGAATCTGCACCTCTGCCTGATGCCTACTGCCTCGGA	Pool_11
9491	PSMF1.2981	TGCTGTTGACAGTGAGCGCCCAGTCATGAGTAATCATCAATAGTGAAGCCACAGATGTATTGATGATTACTCATGACTGGATGCCTACTGCCTCGGA	Pool_11
9491	PSMF1.2760	TGCTGTTGACAGTGAGCGCAAGTCCGAAAAGATAGTTATATAGTGAAGCCACAGATGTATATAACTATCTTTTCGGACTTTTGCCTACTGCCTCGGA	Pool_11
29108	PYCARD.140	TGCTGTTGACAGTGAGCGACCGAGGAGCTCAAGAAGTTCATAGTGAAGCCACAGATGTATGAACTTCTTGAGCTCCTCGGCTGCCTACTGCCTCGGA	Pool_11
29108	PYCARD.141	TGCTGTTGACAGTGAGCGACGAGGAGCTCAAGAAGTTCAATAGTGAAGCCACAGATGTATTGAACTTCTTGAGCTCCTCGGTGCCTACTGCCTCGGA	Pool_11
29108	PYCARD.517	TGCTGTTGACAGTGAGCGAAAGCTCTTCAGTTTCACACCATAGTGAAGCCACAGATGTATGGTGTGAAACTGAAGAGCTTCTGCCTACTGCCTCGGA	Pool_11
29108	PYCARD.514	TGCTGTTGACAGTGAGCGACGGAAGCTCTTCAGTTTCACATAGTGAAGCCACAGATGTATGTGAAACTGAAGAGCTTCCGCTGCCTACTGCCTCGGA	Pool_11
29108	PYCARD.146	TGCTGTTGACAGTGAGCGAAGCTCAAGAAGTTCAAGCTGATAGTGAAGCCACAGATGTATCAGCTTGAACTTCTTGAGCTCTGCCTACTGCCTCGGA	Pool_11
29108	PYCARD.147	TGCTGTTGACAGTGAGCGCGCTCAAGAAGTTCAAGCTGAATAGTGAAGCCACAGATGTATTCAGCTTGAACTTCTTGAGCTTGCCTACTGCCTCGGA	Pool_11
8438	RAD54L.1129	TGCTGTTGACAGTGAGCGCCAGCTTGGTACATTTTGTTAATAGTGAAGCCACAGATGTATTAACAAAATGTACCAAGCTGATGCCTACTGCCTCGGA	Pool_11
8438	RAD54L.1563	TGCTGTTGACAGTGAGCGCTCCCTCCTGGTTACAGCTCTATAGTGAAGCCACAGATGTATAGAGCTGTAACCAGGAGGGAATGCCTACTGCCTCGGA	Pool_11
8438	RAD54L.1957	TGCTGTTGACAGTGAGCGCAAAGAAGACTTGCTATATCTATAGTGAAGCCACAGATGTATAGATATAGCAAGTCTTCTTTTTGCCTACTGCCTCGGA	Pool_11
8438	RAD54L.1753	TGCTGTTGACAGTGAGCGCTGGCACGATGTCCATTAAGAATAGTGAAGCCACAGATGTATTCTTAATGGACATCGTGCCATTGCCTACTGCCTCGGA	Pool_11
8438	RAD54L.1018	TGCTGTTGACAGTGAGCGCCAGGCTCAAGAACTCTGAGAATAGTGAAGCCACAGATGTATTCTCAGAGTTCTTGAGCCTGTTGCCTACTGCCTCGGA	Pool_11
8438	RAD54L.862	TGCTGTTGACAGTGAGCGATAAGGATGAAATAGACCAAAATAGTGAAGCCACAGATGTATTTTGGTCTATTTCATCCTTAGTGCCTACTGCCTCGGA	Pool_11
5883	RAD9A.2083	TGCTGTTGACAGTGAGCGAACGCTGCTATTGATTCATTAATAGTGAAGCCACAGATGTATTAATGAATCAATAGCAGCGTCTGCCTACTGCCTCGGA	Pool_11
5883	RAD9A.1591	TGCTGTTGACAGTGAGCGCCAGGCTCACCTTCCTAAGGAATAGTGAAGCCACAGATGTATTCCTTAGGAAGGTGAGCCTGATGCCTACTGCCTCGGA	Pool_11
5883	RAD9A.256	TGCTGTTGACAGTGAGCGACCCGCTCTTCTTCCAGCAATATAGTGAAGCCACAGATGTATATTGCTGGAAGAAGAGCGGGGTGCCTACTGCCTCGGA	Pool_11
5883	RAD9A.1749	TGCTGTTGACAGTGAGCGCTGGCGCTGACTTGGAATTCTATAGTGAAGCCACAGATGTATAGAATTCCAAGTCAGCGCCAATGCCTACTGCCTCGGA	Pool_11
5883	RAD9A.1858	TGCTGTTGACAGTGAGCGACAGGCAGTGTCTTAGATGTGATAGTGAAGCCACAGATGTATCACATCTAAGACACTGCCTGGTGCCTACTGCCTCGGA	Pool_11
5883	RAD9A.307	TGCTGTTGACAGTGAGCGCGCGCTGTAAGATCCTGATGAATAGTGAAGCCACAGATGTATTCATCAGGATCTTACAGCGCATGCCTACTGCCTCGGA	Pool_11
11186	RASSF1.1132	TGCTGTTGACAGTGAGCGAAAGAGTCTTGGTTTCTCTCTATAGTGAAGCCACAGATGTATAGAGAGAAACCAAGACTCTTCTGCCTACTGCCTCGGA	Pool_11
11186	RASSF1.365	TGCTGTTGACAGTGAGCGACCGCAAGTTTGCACTCTTTGATAGTGAAGCCACAGATGTATCAAAGAGTGCAAACTTGCGGGTGCCTACTGCCTCGGA	Pool_11
11186	RASSF1.128	TGCTGTTGACAGTGAGCGCCACAGGCTTCATCAAGGTTCATAGTGAAGCCACAGATGTATGAACCTTGATGAAGCCTGTGTTGCCTACTGCCTCGGA	Pool_11
11186	RASSF1.943	TGCTGTTGACAGTGAGCGATGCAGACAGAAGTCTCCTCAATAGTGAAGCCACAGATGTATTGAGGAGACTTCTGTCTGCACTGCCTACTGCCTCGGA	Pool_11
11186	RASSF1.53	TGCTGTTGACAGTGAGCGCTGAGCAGAAGATCAAGGAGTATAGTGAAGCCACAGATGTATACTCCTTGATCTTCTGCTCAATGCCTACTGCCTCGGA	Pool_11
11186	RASSF1.43	TGCTGTTGACAGTGAGCGAAAGCTGAGATTGAGCAGAAGATAGTGAAGCCACAGATGTATCTTCTGCTCAATCTCAGCTTGTGCCTACTGCCTCGGA	Pool_11
9401	RECQL4.1105	TGCTGTTGACAGTGAGCGCACGGCTCAACATGAAGCAGAATAGTGAAGCCACAGATGTATTCTGCTTCATGTTGAGCCGTATGCCTACTGCCTCGGA	Pool_11
9401	RECQL4.3772	TGCTGTTGACAGTGAGCGAAGGCTCCAAAATGCAGAATAATAGTGAAGCCACAGATGTATTATTCTGCATTTTGGAGCCTCTGCCTACTGCCTCGGA	Pool_11
9401	RECQL4.3190	TGCTGTTGACAGTGAGCGCCCAGATATGTGACTTCCTCTATAGTGAAGCCACAGATGTATAGAGGAAGTCACATATCTGGTTGCCTACTGCCTCGGA	Pool_11
9401	RECQL4.1111	TGCTGTTGACAGTGAGCGCCAACATGAAGCAGAAACACTATAGTGAAGCCACAGATGTATAGTGTTTCTGCTTCATGTTGATGCCTACTGCCTCGGA	Pool_11
9401	RECQL4.1337	TGCTGTTGACAGTGAGCGACCACTGGTTCCTTCACCACAATAGTGAAGCCACAGATGTATTGTGGTGAAGGAACCAGTGGCTGCCTACTGCCTCGGA	Pool_11
9401	RECQL4.2800	TGCTGTTGACAGTGAGCGACATCGAGACTTTGCTGTGCTATAGTGAAGCCACAGATGTATAGCACAGCAAAGTCTCGATGGTGCCTACTGCCTCGGA	Pool_11
5980	REV3L.9808	TGCTGTTGACAGTGAGCGAAAGGATGTTCACTGTCTGTTATAGTGAAGCCACAGATGTATAACAGACAGTGAACATCCTTGTGCCTACTGCCTCGGA	Pool_11
5980	REV3L.9559	TGCTGTTGACAGTGAGCGCCAGGAGCAACTTGTAAAGATATAGTGAAGCCACAGATGTATATCTTTACAAGTTGCTCCTGTTGCCTACTGCCTCGGA	Pool_11
5980	REV3L.10172	TGCTGTTGACAGTGAGCGCAACGAGCAAAATAATGTGCAATAGTGAAGCCACAGATGTATTGCACATTATTTTGCTCGTTTTGCCTACTGCCTCGGA	Pool_11
5980	REV3L.2005	TGCTGTTGACAGTGAGCGCCACAAAGATGCTGCTACATTATAGTGAAGCCACAGATGTATAATGTAGCAGCATCTTTGTGATGCCTACTGCCTCGGA	Pool_11
5980	REV3L.8673	TGCTGTTGACAGTGAGCGCCAGTATGTTTGTGCTACTGAATAGTGAAGCCACAGATGTATTCAGTAGCACAAACATACTGTTGCCTACTGCCTCGGA	Pool_11
5980	REV3L.1309	TGCTGTTGACAGTGAGCGACAGGAGTTCTCTGCTGAGTTATAGTGAAGCCACAGATGTATAACTCAGCAGAGAACTCCTGGTGCCTACTGCCTCGGA	Pool_11
51065	RPS27L.362	TGCTGTTGACAGTGAGCGAAAGGGTGTTCATTTAGAAGAATAGTGAAGCCACAGATGTATTCTTCTAAATGAACACCCTTCTGCCTACTGCCTCGGA	Pool_11
51065	RPS27L.289	TGCTGTTGACAGTGAGCGCCAGACAGTGGTTCTTTGTGTATAGTGAAGCCACAGATGTATACACAAAGAACCACTGTCTGATGCCTACTGCCTCGGA	Pool_11
51065	RPS27L.1041	TGCTGTTGACAGTGAGCGACAGAACTTAAACTATAATTAATAGTGAAGCCACAGATGTATTAATTATAGTTTAAGTTCTGGTGCCTACTGCCTCGGA	Pool_11
51065	RPS27L.475	TGCTGTTGACAGTGAGCGCTACCAAGATAATGTAATTACATAGTGAAGCCACAGATGTATGTAATTACATTATCTTGGTAATGCCTACTGCCTCGGA	Pool_11
51065	RPS27L.359	TGCTGTTGACAGTGAGCGCCAGAAGGGTGTTCATTTAGAATAGTGAAGCCACAGATGTATTCTAAATGAACACCCTTCTGTTGCCTACTGCCTCGGA	Pool_11
51065	RPS27L.363	TGCTGTTGACAGTGAGCGCAGGGTGTTCATTTAGAAGAAATAGTGAAGCCACAGATGTATTTCTTCTAAATGAACACCCTTTGCCTACTGCCTCGGA	Pool_11
8607	RUVBL1.487	TGCTGTTGACAGTGAGCGAAAGGAAGTTTATGAAGGTGAATAGTGAAGCCACAGATGTATTCACCTTCATAAACTTCCTTGTGCCTACTGCCTCGGA	Pool_11
8607	RUVBL1.907	TGCTGTTGACAGTGAGCGAAAGACAGAAATCACAGACAAATAGTGAAGCCACAGATGTATTTGTCTGTGATTTCTGTCTTCTGCCTACTGCCTCGGA	Pool_11
8607	RUVBL1.1673	TGCTGTTGACAGTGAGCGCTACCTGGTGTGTTTTCTATAATAGTGAAGCCACAGATGTATTATAGAAAACACACCAGGTAATGCCTACTGCCTCGGA	Pool_11
8607	RUVBL1.500	TGCTGTTGACAGTGAGCGAAAGGTGAAGTCACAGAGCTAATAGTGAAGCCACAGATGTATTAGCTCTGTGACTTCACCTTCTGCCTACTGCCTCGGA	Pool_11
8607	RUVBL1.991	TGCTGTTGACAGTGAGCGACCGGGTGTGCTGTTTGTTGATTAGTGAAGCCACAGATGTAATCAACAAACAGCACACCCGGGTGCCTACTGCCTCGGA	Pool_11
8607	RUVBL1.906	TGCTGTTGACAGTGAGCGCGAAGACAGAAATCACAGACAATAGTGAAGCCACAGATGTATTGTCTGTGATTTCTGTCTTCTTGCCTACTGCCTCGGA	Pool_11
6421	SFPQ.2323	TGCTGTTGACAGTGAGCGCTAGCAGTTTATTGACCTAATATAGTGAAGCCACAGATGTATATTAGGTCAATAAACTGCTAATGCCTACTGCCTCGGA	Pool_11
6421	SFPQ.1022	TGCTGTTGACAGTGAGCGAGAGGATGAATTCAAAAGACTATAGTGAAGCCACAGATGTATAGTCTTTTGAATTCATCCTCCTGCCTACTGCCTCGGA	Pool_11
6421	SFPQ.1063	TGCTGTTGACAGTGAGCGAAGGAGAAGTTTTTATCAACAATAGTGAAGCCACAGATGTATTGTTGATAAAAACTTCTCCTGTGCCTACTGCCTCGGA	Pool_11
6421	SFPQ.1743	TGCTGTTGACAGTGAGCGAAAGAACTTCACAATCAAGAAATAGTGAAGCCACAGATGTATTTCTTGATTGTGAAGTTCTTCTGCCTACTGCCTCGGA	Pool_11
6421	SFPQ.2208	TGCTGTTGACAGTGAGCGACCCGATTTTAGATGTGATATTTAGTGAAGCCACAGATGTAAATATCACATCTAAAATCGGGGTGCCTACTGCCTCGGA	Pool_11
6421	SFPQ.1766	TGCTGTTGACAGTGAGCGACAGAAACGTAAAGAAATGCAATAGTGAAGCCACAGATGTATTGCATTTCTTTACGTTTCTGCTGCCTACTGCCTCGGA	Pool_11
8467	SMARCA5.2607	TGCTGTTGACAGTGAGCGAAAGGAGAAGACTATAGAGAAATAGTGAAGCCACAGATGTATTTCTCTATAGTCTTCTCCTTCTGCCTACTGCCTCGGA	Pool_11
8467	SMARCA5.1445	TGCTGTTGACAGTGAGCGAAAGACTACAAATAGACTATTATAGTGAAGCCACAGATGTATAATAGTCTATTTGTAGTCTTGTGCCTACTGCCTCGGA	Pool_11
8467	SMARCA5.3455	TGCTGTTGACAGTGAGCGACAGAGGAGATGTAATACCTTATAGTGAAGCCACAGATGTATAAGGTATTACATCTCCTCTGGTGCCTACTGCCTCGGA	Pool_11
8467	SMARCA5.2936	TGCTGTTGACAGTGAGCGCTCCCTTAATGATGAAGAGTTATAGTGAAGCCACAGATGTATAACTCTTCATCATTAAGGGATTGCCTACTGCCTCGGA	Pool_11
8467	SMARCA5.3186	TGCTGTTGACAGTGAGCGAAGGCGAGAATTCAAAGAAGAATAGTGAAGCCACAGATGTATTCTTCTTTGAATTCTCGCCTCTGCCTACTGCCTCGGA	Pool_11
8467	SMARCA5.2294	TGCTGTTGACAGTGAGCGCAACACTGTAGAAGAAAGAATATAGTGAAGCCACAGATGTATATTCTTTCTTCTACAGTGTTATGCCTACTGCCTCGGA	Pool_11
79677	SMC6.1192	TGCTGTTGACAGTGAGCGAAAGGATATTCAAGACAAACTATAGTGAAGCCACAGATGTATAGTTTGTCTTGAATATCCTTGTGCCTACTGCCTCGGA	Pool_11
79677	SMC6.1268	TGCTGTTGACAGTGAGCGACAGATGTTGTTGCTAAGAAAATAGTGAAGCCACAGATGTATTTTCTTAGCAACAACATCTGCTGCCTACTGCCTCGGA	Pool_11
79677	SMC6.1189	TGCTGTTGACAGTGAGCGATACAAGGATATTCAAGACAAATAGTGAAGCCACAGATGTATTTGTCTTGAATATCCTTGTACTGCCTACTGCCTCGGA	Pool_11
79677	SMC6.1267	TGCTGTTGACAGTGAGCGCGCAGATGTTGTTGCTAAGAAATAGTGAAGCCACAGATGTATTTCTTAGCAACAACATCTGCTTGCCTACTGCCTCGGA	Pool_11
79677	SMC6.3466	TGCTGTTGACAGTGAGCGCCAAGAAGAAGATGATGACCAATAGTGAAGCCACAGATGTATTGGTCATCATCTTCTTCTTGATGCCTACTGCCTCGGA	Pool_11
79677	SMC6.2040	TGCTGTTGACAGTGAGCGCAGAGACAGTGCTACTAATCAATAGTGAAGCCACAGATGTATTGATTAGTAGCACTGTCTCTATGCCTACTGCCTCGGA	Pool_11
6749	SSRP1.2236	TGCTGTTGACAGTGAGCGCAAGCGAGAGCTTCAAGAGCAATAGTGAAGCCACAGATGTATTGCTCTTGAAGCTCTCGCTTATGCCTACTGCCTCGGA	Pool_11
6749	SSRP1.1951	TGCTGTTGACAGTGAGCGACCGAGAGAAGATCAAGTCAGATAGTGAAGCCACAGATGTATCTGACTTGATCTTCTCTCGGCTGCCTACTGCCTCGGA	Pool_11
6749	SSRP1.2168	TGCTGTTGACAGTGAGCGCAAGGTAAAGATGGAAAAGAAATAGTGAAGCCACAGATGTATTTCTTTTCCATCTTTACCTTTTGCCTACTGCCTCGGA	Pool_11
6749	SSRP1.2149	TGCTGTTGACAGTGAGCGAAAAGAAGAAGAAGAAAGTAAATAGTGAAGCCACAGATGTATTTACTTTCTTCTTCTTCTTTGTGCCTACTGCCTCGGA	Pool_11
6749	SSRP1.2143	TGCTGTTGACAGTGAGCGCCAAGTCAAAGAAGAAGAAGAATAGTGAAGCCACAGATGTATTCTTCTTCTTCTTTGACTTGTTGCCTACTGCCTCGGA	Pool_11
6749	SSRP1.2321	TGCTGTTGACAGTGAGCGAAGCGAGGACTCTGAAGAAGAATAGTGAAGCCACAGATGTATTCTTCTTCAGAGTCCTCGCTCTGCCTACTGCCTCGGA	Pool_11
6996	TDG.1009	TGCTGTTGACAGTGAGCGCCAGAAACTCTCTGCTATGTTATAGTGAAGCCACAGATGTATAACATAGCAGAGAGTTTCTGTTGCCTACTGCCTCGGA	Pool_11
6996	TDG.2804	TGCTGTTGACAGTGAGCGAAAGCTGTGTAAAAGTCATTTATAGTGAAGCCACAGATGTATAAATGACTTTTACACAGCTTGTGCCTACTGCCTCGGA	Pool_11
6996	TDG.2347	TGCTGTTGACAGTGAGCGATACATGAGATGTACTAAAATATAGTGAAGCCACAGATGTATATTTTAGTACATCTCATGTACTGCCTACTGCCTCGGA	Pool_11
6996	TDG.821	TGCTGTTGACAGTGAGCGACAGCAAAGATCTCTCCAGTAATAGTGAAGCCACAGATGTATTACTGGAGAGATCTTTGCTGCTGCCTACTGCCTCGGA	Pool_11
6996	TDG.1077	TGCTGTTGACAGTGAGCGAAAAGTTCATTACTACATAAAATAGTGAAGCCACAGATGTATTTTATGTAGTAATGAACTTTGTGCCTACTGCCTCGGA	Pool_11
6996	TDG.3107	TGCTGTTGACAGTGAGCGCTGAGTAGTAAATGTTGATATATAGTGAAGCCACAGATGTATATATCAACATTTACTACTCATTGCCTACTGCCTCGGA	Pool_11
7157	TP53.1054	TGCTGTTGACAGTGAGCGAAGGGATGTTTGGGAGATGTAATAGTGAAGCCACAGATGTATTACATCTCCCAAACATCCCTCTGCCTACTGCCTCGGA	Pool_11
7157	TP53.326	TGCTGTTGACAGTGAGCGCCCACTACAACTACATGTGTAATAGTGAAGCCACAGATGTATTACACATGTAGTTGTAGTGGATGCCTACTGCCTCGGA	Pool_11
7157	TP53.204	TGCTGTTGACAGTGAGCGCCAGCATCTTATCCGAGTGGAATAGTGAAGCCACAGATGTATTCCACTCGGATAAGATGCTGATGCCTACTGCCTCGGA	Pool_11
7157	TP53.325	TGCTGTTGACAGTGAGCGCTCCACTACAACTACATGTGTATAGTGAAGCCACAGATGTATACACATGTAGTTGTAGTGGATTGCCTACTGCCTCGGA	Pool_11
7157	TP53.1347	TGCTGTTGACAGTGAGCGATCGGTGGGTTGGTAGTTTCTATAGTGAAGCCACAGATGTATAGAAACTACCAACCCACCGACTGCCTACTGCCTCGGA	Pool_11
7157	TP53.1026	TGCTGTTGACAGTGAGCGACAGCTTAGATTTTAAGGTTTTTAGTGAAGCCACAGATGTAAAAACCTTAAAATCTAAGCTGGTGCCTACTGCCTCGGA	Pool_11
10155	TRIM28.2588	TGCTGTTGACAGTGAGCGACCGCATGTTCAAGCAATTCAATAGTGAAGCCACAGATGTATTGAATTGCTTGAACATGCGGCTGCCTACTGCCTCGGA	Pool_11
10155	TRIM28.1648	TGCTGTTGACAGTGAGCGCCAGGAGATGATCCCTACTCAATAGTGAAGCCACAGATGTATTGAGTAGGGATCATCTCCTGATGCCTACTGCCTCGGA	Pool_11
10155	TRIM28.1839	TGCTGTTGACAGTGAGCGATACAACCTTATTGTTATTGAATAGTGAAGCCACAGATGTATTCAATAACAATAAGGTTGTAGTGCCTACTGCCTCGGA	Pool_11
10155	TRIM28.2591	TGCTGTTGACAGTGAGCGACATGTTCAAGCAATTCAACAATAGTGAAGCCACAGATGTATTGTTGAATTGCTTGAACATGCTGCCTACTGCCTCGGA	Pool_11
10155	TRIM28.2596	TGCTGTTGACAGTGAGCGCTCAAGCAATTCAACAAGTTAATAGTGAAGCCACAGATGTATTAACTTGTTGAATTGCTTGAATGCCTACTGCCTCGGA	Pool_11
10155	TRIM28.2192	TGCTGTTGACAGTGAGCGAAGGCGATCTGGTTATGTGCAATAGTGAAGCCACAGATGTATTGCACATAACCAGATCGCCTGTGCCTACTGCCTCGGA	Pool_11
9319	TRIP13.858	TGCTGTTGACAGTGAGCGCCAGGATTTGATTGATGATAAATAGTGAAGCCACAGATGTATTTATCATCAATCAAATCCTGATGCCTACTGCCTCGGA	Pool_11
9319	TRIP13.264	TGCTGTTGACAGTGAGCGCAACCTGAGTGTTAGAAAGCTATAGTGAAGCCACAGATGTATAGCTTTCTAACACTCAGGTTTTGCCTACTGCCTCGGA	Pool_11
9319	TRIP13.839	TGCTGTTGACAGTGAGCGACAAGATGTTTCAGAAGATTCATAGTGAAGCCACAGATGTATGAATCTTCTGAAACATCTTGGTGCCTACTGCCTCGGA	Pool_11
9319	TRIP13.836	TGCTGTTGACAGTGAGCGCAACCAAGATGTTTCAGAAGATTAGTGAAGCCACAGATGTAATCTTCTGAAACATCTTGGTTATGCCTACTGCCTCGGA	Pool_11
9319	TRIP13.993	TGCTGTTGACAGTGAGCGAACCCAAATTGATCAGATTAAATAGTGAAGCCACAGATGTATTTAATCTGATCAATTTGGGTCTGCCTACTGCCTCGGA	Pool_11
9319	TRIP13.487	TGCTGTTGACAGTGAGCGAAGGAAGAGACAGAAAACATAATAGTGAAGCCACAGATGTATTATGTTTTCTGTCTCTTCCTCTGCCTACTGCCTCGGA	Pool_11
7323	UBE2D3.1105	TGCTGTTGACAGTGAGCGAAGGCTTGGAGCTATTAGTTAATAGTGAAGCCACAGATGTATTAACTAATAGCTCCAAGCCTCTGCCTACTGCCTCGGA	Pool_11
7323	UBE2D3.364	TGCTGTTGACAGTGAGCGCAACAGACAGAGATAAGTACAATAGTGAAGCCACAGATGTATTGTACTTATCTCTGTCTGTTTTGCCTACTGCCTCGGA	Pool_11
7323	UBE2D3.1668	TGCTGTTGACAGTGAGCGCTGGGTCAAAATTTGCAAAATATAGTGAAGCCACAGATGTATATTTTGCAAATTTTGACCCATTGCCTACTGCCTCGGA	Pool_11
7323	UBE2D3.948	TGCTGTTGACAGTGAGCGCTAGCATCAGCAGAACAGAAAATAGTGAAGCCACAGATGTATTTTCTGTTCTGCTGATGCTATTGCCTACTGCCTCGGA	Pool_11
7323	UBE2D3.1849	TGCTGTTGACAGTGAGCGCAAAGTCAATGCTATTGGAAAATAGTGAAGCCACAGATGTATTTTCCAATAGCATTGACTTTTTGCCTACTGCCTCGGA	Pool_11
7323	UBE2D3.1182	TGCTGTTGACAGTGAGCGCTGGATGAGTGATCAACTAATATAGTGAAGCCACAGATGTATATTAGTTGATCACTCATCCATTGCCTACTGCCTCGGA	Pool_11
23503	ZFYVE26.8169	TGCTGTTGACAGTGAGCGACCGGGTTGTCCTGTTTGTATATAGTGAAGCCACAGATGTATATACAAACAGGACAACCCGGGTGCCTACTGCCTCGGA	Pool_11
23503	ZFYVE26.6095	TGCTGTTGACAGTGAGCGACGCCAAGATGATGTTCGTCAATAGTGAAGCCACAGATGTATTGACGAACATCATCTTGGCGCTGCCTACTGCCTCGGA	Pool_11
23503	ZFYVE26.4112	TGCTGTTGACAGTGAGCGACCCGAGGTTAAAGGTCAGCAATAGTGAAGCCACAGATGTATTGCTGACCTTTAACCTCGGGGTGCCTACTGCCTCGGA	Pool_11
23503	ZFYVE26.6459	TGCTGTTGACAGTGAGCGACAGGATGTGGTTGAGTACCTATAGTGAAGCCACAGATGTATAGGTACTCAACCACATCCTGCTGCCTACTGCCTCGGA	Pool_11
23503	ZFYVE26.9195	TGCTGTTGACAGTGAGCGCACCAAGATTTTTAGTAGTAAATAGTGAAGCCACAGATGTATTTACTACTAAAAATCTTGGTTTGCCTACTGCCTCGGA	Pool_11
23503	ZFYVE26.6158	TGCTGTTGACAGTGAGCGCCAGCAAGGTAGATGTGCTGAATAGTGAAGCCACAGATGTATTCAGCACATCTACCTTGCTGATGCCTACTGCCTCGGA	Pool_11
10973	ASCC3.310	TGCTGTTGACAGTGAGCGCTGGATCACTGATTGAATAATATAGTGAAGCCACAGATGTATATTATTCAATCAGTGATCCATTGCCTACTGCCTCGGA	Pool_11
10973	ASCC3.200	TGCTGTTGACAGTGAGCGAGGCGTGGGAAGTTAAAGTAAATAGTGAAGCCACAGATGTATTTACTTTAACTTCCCACGCCGTGCCTACTGCCTCGGA	Pool_11
10973	ASCC3.504	TGCTGTTGACAGTGAGCGATGGAGAAGAGTAAAATGCAAATAGTGAAGCCACAGATGTATTTGCATTTTACTCTTCTCCAGTGCCTACTGCCTCGGA	Pool_11
10973	ASCC3.360	TGCTGTTGACAGTGAGCGCTGCGTTCCTTTTCAAATGTCATAGTGAAGCCACAGATGTATGACATTTGAAAAGGAACGCAATGCCTACTGCCTCGGA	Pool_11
10973	ASCC3.459	TGCTGTTGACAGTGAGCGCTGGGCCTGACATGGAAGAAGATAGTGAAGCCACAGATGTATCTTCTTCCATGTCAGGCCCAATGCCTACTGCCTCGGA	Pool_11
10973	ASCC3.465	TGCTGTTGACAGTGAGCGATGACATGGAAGAAGATAATAATAGTGAAGCCACAGATGTATTATTATCTTCTTCCATGTCAGTGCCTACTGCCTCGGA	Pool_11
4282	MIF.375	TGCTGTTGACAGTGAGCGCCAGGGTCTACATCAACTATTATAGTGAAGCCACAGATGTATAATAGTTGATGTAGACCCTGTTGCCTACTGCCTCGGA	Pool_11
4282	MIF.95	TGCTGTTGACAGTGAGCGCTCATGCCGATGTTCATCGTAATAGTGAAGCCACAGATGTATTACGATGAACATCGGCATGATTGCCTACTGCCTCGGA	Pool_11
4282	MIF.372	TGCTGTTGACAGTGAGCGAGGACAGGGTCTACATCAACTATAGTGAAGCCACAGATGTATAGTTGATGTAGACCCTGTCCGTGCCTACTGCCTCGGA	Pool_11
4282	MIF.380	TGCTGTTGACAGTGAGCGATCTACATCAACTATTACGACATAGTGAAGCCACAGATGTATGTCGTAATAGTTGATGTAGACTGCCTACTGCCTCGGA	Pool_11
4282	MIF.98	TGCTGTTGACAGTGAGCGCTGCCGATGTTCATCGTAAACATAGTGAAGCCACAGATGTATGTTTACGATGAACATCGGCATTGCCTACTGCCTCGGA	Pool_11
4282	MIF.378	TGCTGTTGACAGTGAGCGAGGTCTACATCAACTATTACGATAGTGAAGCCACAGATGTATCGTAATAGTTGATGTAGACCCTGCCTACTGCCTCGGA	Pool_11
5981	RFC1.3419	TGCTGTTGACAGTGAGCGCTCGGAATACAATGAAGAATTATAGTGAAGCCACAGATGTATAATTCTTCATTGTATTCCGAATGCCTACTGCCTCGGA	Pool_11
5981	RFC1.3887	TGCTGTTGACAGTGAGCGATCAGATTTTAGTTAACAATAATAGTGAAGCCACAGATGTATTATTGTTAACTAAAATCTGACTGCCTACTGCCTCGGA	Pool_11
5981	RFC1.791	TGCTGTTGACAGTGAGCGAAGGCAGTTGCATGAAGATGAATAGTGAAGCCACAGATGTATTCATCTTCATGCAACTGCCTCTGCCTACTGCCTCGGA	Pool_11
5981	RFC1.956	TGCTGTTGACAGTGAGCGCACAGCACAAGTTTCAGATGAATAGTGAAGCCACAGATGTATTCATCTGAAACTTGTGCTGTTTGCCTACTGCCTCGGA	Pool_11
5981	RFC1.1267	TGCTGTTGACAGTGAGCGCACGCACTAATTATCAAGCTTATAGTGAAGCCACAGATGTATAAGCTTGATAATTAGTGCGTTTGCCTACTGCCTCGGA	Pool_11
5981	RFC1.1454	TGCTGTTGACAGTGAGCGCACAGGAAATGTCAGCAAGAAATAGTGAAGCCACAGATGTATTTCTTGCTGACATTTCCTGTTTGCCTACTGCCTCGGA	Pool_11
79913	ACTR5.1911	TGCTGTTGACAGTGAGCGCCAGGACTGTGATTGTGCTAGATAGTGAAGCCACAGATGTATCTAGCACAATCACAGTCCTGTTGCCTACTGCCTCGGA	Pool_12
79913	ACTR5.1038	TGCTGTTGACAGTGAGCGACAGATGGATCAGTTTCACAAATAGTGAAGCCACAGATGTATTTGTGAAACTGATCCATCTGGTGCCTACTGCCTCGGA	Pool_12
79913	ACTR5.1653	TGCTGTTGACAGTGAGCGAAACCACCTAGATGATAATGAATAGTGAAGCCACAGATGTATTCATTATCATCTAGGTGGTTCTGCCTACTGCCTCGGA	Pool_12
79913	ACTR5.1685	TGCTGTTGACAGTGAGCGACAGGAAAGAGTATGAAGAAAATAGTGAAGCCACAGATGTATTTTCTTCATACTCTTTCCTGGTGCCTACTGCCTCGGA	Pool_12
79913	ACTR5.1037	TGCTGTTGACAGTGAGCGACCAGATGGATCAGTTTCACAATAGTGAAGCCACAGATGTATTGTGAAACTGATCCATCTGGCTGCCTACTGCCTCGGA	Pool_12
79913	ACTR5.625	TGCTGTTGACAGTGAGCGAAAGGGAGATTAGATGCTAAAATAGTGAAGCCACAGATGTATTTTAGCATCTAATCTCCCTTCTGCCTACTGCCTCGGA	Pool_12
7832	BTG2.2612	TGCTGTTGACAGTGAGCGCAAGGTTACTAATTGTATGATATAGTGAAGCCACAGATGTATATCATACAATTAGTAACCTTTTGCCTACTGCCTCGGA	Pool_12
7832	BTG2.1585	TGCTGTTGACAGTGAGCGATAGGACAAGAGTTCTCAGTCATAGTGAAGCCACAGATGTATGACTGAGAACTCTTGTCCTAGTGCCTACTGCCTCGGA	Pool_12
7832	BTG2.2574	TGCTGTTGACAGTGAGCGATAGTAGTATGTTTGTAAGCTATAGTGAAGCCACAGATGTATAGCTTACAAACATACTACTACTGCCTACTGCCTCGGA	Pool_12
7832	BTG2.1806	TGCTGTTGACAGTGAGCGACCGACACTAAATAAAAGCCAATAGTGAAGCCACAGATGTATTGGCTTTTATTTAGTGTCGGCTGCCTACTGCCTCGGA	Pool_12
7832	BTG2.678	TGCTGTTGACAGTGAGCGCAAGGAGGAAAAGAAACCAAAATAGTGAAGCCACAGATGTATTTTGGTTTCTTTTCCTCCTTTTGCCTACTGCCTCGGA	Pool_12
7832	BTG2.1147	TGCTGTTGACAGTGAGCGCCATGACTTGTTTCTAATTCTATAGTGAAGCCACAGATGTATAGAATTAGAAACAAGTCATGATGCCTACTGCCTCGGA	Pool_12
842	CASP9.1279	TGCTGTTGACAGTGAGCGACAGCTTCCAGATTGACGACAATAGTGAAGCCACAGATGTATTGTCGTCAATCTGGAAGCTGCTGCCTACTGCCTCGGA	Pool_12
842	CASP9.888	TGCTGTTGACAGTGAGCGACAGTGACATCTTTGTGTCCTATAGTGAAGCCACAGATGTATAGGACACAAAGATGTCACTGGTGCCTACTGCCTCGGA	Pool_12
842	CASP9.290	TGCTGTTGACAGTGAGCGATCGGTGCTCTTGAGAGTTTGATAGTGAAGCCACAGATGTATCAAACTCTCAAGAGCACCGACTGCCTACTGCCTCGGA	Pool_12
842	CASP9.128	TGCTGTTGACAGTGAGCGATGGCTTCGTTTCTGCGAACTATAGTGAAGCCACAGATGTATAGTTCGCAGAAACGAAGCCAGTGCCTACTGCCTCGGA	Pool_12
842	CASP9.1419	TGCTGTTGACAGTGAGCGACAGGGATTAACCTCTGCACTATAGTGAAGCCACAGATGTATAGTGCAGAGGTTAATCCCTGCTGCCTACTGCCTCGGA	Pool_12
842	CASP9.1048	TGCTGTTGACAGTGAGCGCTCGGTGAAAGGGATTTATAAATAGTGAAGCCACAGATGTATTTATAAATCCCTTTCACCGAATGCCTACTGCCTCGGA	Pool_12
8445	DYRK2.2562	TGCTGTTGACAGTGAGCGCCAGAATCAAAGTGACATTCTATAGTGAAGCCACAGATGTATAGAATGTCACTTTGATTCTGATGCCTACTGCCTCGGA	Pool_12
8445	DYRK2.3230	TGCTGTTGACAGTGAGCGCAAAGTTCAACCTCAAGTTAAATAGTGAAGCCACAGATGTATTTAACTTGAGGTTGAACTTTTTGCCTACTGCCTCGGA	Pool_12
8445	DYRK2.4768	TGCTGTTGACAGTGAGCGACAGCGTGTTCATTACCACTTATAGTGAAGCCACAGATGTATAAGTGGTAATGAACACGCTGGTGCCTACTGCCTCGGA	Pool_12
8445	DYRK2.4546	TGCTGTTGACAGTGAGCGATAGTTTGATTGTCATGTCAAATAGTGAAGCCACAGATGTATTTGACATGACAATCAAACTAGTGCCTACTGCCTCGGA	Pool_12
8445	DYRK2.1335	TGCTGTTGACAGTGAGCGACAGGGTAGAAGCGGTATTAAATAGTGAAGCCACAGATGTATTTAATACCGCTTCTACCCTGCTGCCTACTGCCTCGGA	Pool_12
8445	DYRK2.4338	TGCTGTTGACAGTGAGCGCCCGCACAAAACTGGTTCTTAATAGTGAAGCCACAGATGTATTAAGAACCAGTTTTGTGCGGTTGCCTACTGCCTCGGA	Pool_12
22944	KIN.530	TGCTGTTGACAGTGAGCGACAGGACCTTGATGATGAAGAATAGTGAAGCCACAGATGTATTCTTCATCATCAAGGTCCTGCTGCCTACTGCCTCGGA	Pool_12
22944	KIN.1574	TGCTGTTGACAGTGAGCGATAGTAGAGTAGTAAAGTTGAATAGTGAAGCCACAGATGTATTCAACTTTACTACTCTACTACTGCCTACTGCCTCGGA	Pool_12
22944	KIN.953	TGCTGTTGACAGTGAGCGCAAGGCTATTGTTAAGGAAGTATAGTGAAGCCACAGATGTATACTTCCTTAACAATAGCCTTTTGCCTACTGCCTCGGA	Pool_12
22944	KIN.965	TGCTGTTGACAGTGAGCGCAAGGAAGTAATTGACAAATATTAGTGAAGCCACAGATGTAATATTTGTCAATTACTTCCTTATGCCTACTGCCTCGGA	Pool_12
22944	KIN.527	TGCTGTTGACAGTGAGCGCAAGCAGGACCTTGATGATGAATAGTGAAGCCACAGATGTATTCATCATCAAGGTCCTGCTTTTGCCTACTGCCTCGGA	Pool_12
22944	KIN.1184	TGCTGTTGACAGTGAGCGCCGCAGAGTTGAAGGAATTCAATAGTGAAGCCACAGATGTATTGAATTCCTTCAACTCTGCGTTGCCTACTGCCTCGGA	Pool_12
54780	NSMCE4A.1004	TGCTGTTGACAGTGAGCGCCGGGATGGTTTTGCAAGAATATAGTGAAGCCACAGATGTATATTCTTGCAAAACCATCCCGTTGCCTACTGCCTCGGA	Pool_12
54780	NSMCE4A.1097	TGCTGTTGACAGTGAGCGCAACACACAAGTTAGAAATCAATAGTGAAGCCACAGATGTATTGATTTCTAACTTGTGTGTTATGCCTACTGCCTCGGA	Pool_12
54780	NSMCE4A.1311	TGCTGTTGACAGTGAGCGCAAGGCAGATTGTTTTTAGTAATAGTGAAGCCACAGATGTATTACTAAAAACAATCTGCCTTTTGCCTACTGCCTCGGA	Pool_12
54780	NSMCE4A.1312	TGCTGTTGACAGTGAGCGCAGGCAGATTGTTTTTAGTAAATAGTGAAGCCACAGATGTATTTACTAAAAACAATCTGCCTTTGCCTACTGCCTCGGA	Pool_12
54780	NSMCE4A.759	TGCTGTTGACAGTGAGCGACACGAGTTGATCGTCCAAGAATAGTGAAGCCACAGATGTATTCTTGGACGATCAACTCGTGGTGCCTACTGCCTCGGA	Pool_12
54780	NSMCE4A.1336	TGCTGTTGACAGTGAGCGATAGCTTTTGATAGTTAATAAATAGTGAAGCCACAGATGTATTTATTAACTATCAAAAGCTACTGCCTACTGCCTCGGA	Pool_12
51550	CINP.231	TGCTGTTGACAGTGAGCGCAAAGGTGTGTCTGGAATATAATAGTGAAGCCACAGATGTATTATATTCCAGACACACCTTTTTGCCTACTGCCTCGGA	Pool_12
51550	CINP.77	TGCTGTTGACAGTGAGCGACGGCTGATTGGCACAATTTAATAGTGAAGCCACAGATGTATTAAATTGTGCCAATCAGCCGCTGCCTACTGCCTCGGA	Pool_12
51550	CINP.165	TGCTGTTGACAGTGAGCGCCAGTTTATTGAATAAAGACAATAGTGAAGCCACAGATGTATTGTCTTTATTCAATAAACTGATGCCTACTGCCTCGGA	Pool_12
51550	CINP.177	TGCTGTTGACAGTGAGCGCTAAAGACAAGATAGAACTAGATAGTGAAGCCACAGATGTATCTAGTTCTATCTTGTCTTTATTGCCTACTGCCTCGGA	Pool_12
51550	CINP.125	TGCTGTTGACAGTGAGCGACAGGTTTTACCACTGCAAATATAGTGAAGCCACAGATGTATATTTGCAGTGGTAAAACCTGCTGCCTACTGCCTCGGA	Pool_12
51550	CINP.76	TGCTGTTGACAGTGAGCGCGCGGCTGATTGGCACAATTTATAGTGAAGCCACAGATGTATAAATTGTGCCAATCAGCCGCATGCCTACTGCCTCGGA	Pool_12
2140	EYA3.4852	TGCTGTTGACAGTGAGCGACAGGTTCAAGCGATTCTCCTATAGTGAAGCCACAGATGTATAGGAGAATCGCTTGAACCTGGTGCCTACTGCCTCGGA	Pool_12
2140	EYA3.3811	TGCTGTTGACAGTGAGCGCTCCAGAGATGTTGCAGCACAATAGTGAAGCCACAGATGTATTGTGCTGCAACATCTCTGGAATGCCTACTGCCTCGGA	Pool_12
2140	EYA3.1440	TGCTGTTGACAGTGAGCGCCCGGAAAGTGAGAGAAATCTATAGTGAAGCCACAGATGTATAGATTTCTCTCACTTTCCGGTTGCCTACTGCCTCGGA	Pool_12
2140	EYA3.5833	TGCTGTTGACAGTGAGCGCAAGGACGACTTCTACTCAAAATAGTGAAGCCACAGATGTATTTTGAGTAGAAGTCGTCCTTATGCCTACTGCCTCGGA	Pool_12
2140	EYA3.5156	TGCTGTTGACAGTGAGCGATGGCTTGACTTTCGAATGTAATAGTGAAGCCACAGATGTATTACATTCGAAAGTCAAGCCACTGCCTACTGCCTCGGA	Pool_12
2140	EYA3.1657	TGCTGTTGACAGTGAGCGAAAGGTTCTCCTATATGGACTATAGTGAAGCCACAGATGTATAGTCCATATAGGAGAACCTTGTGCCTACTGCCTCGGA	Pool_12
28992	MACROD1.1226	TGCTGTTGACAGTGAGCGACCCGAGGAGCCTAATAAAGATTAGTGAAGCCACAGATGTAATCTTTATTAGGCTCCTCGGGGTGCCTACTGCCTCGGA	Pool_12
28992	MACROD1.68	TGCTGTTGACAGTGAGCGAAGCGCCGTAAATAGAGTCCAATAGTGAAGCCACAGATGTATTGGACTCTATTTACGGCGCTCTGCCTACTGCCTCGGA	Pool_12
28992	MACROD1.559	TGCTGTTGACAGTGAGCGAGACAAGCAGCTCAATGAGAAATAGTGAAGCCACAGATGTATTTCTCATTGAGCTGCTTGTCCTGCCTACTGCCTCGGA	Pool_12
28992	MACROD1.546	TGCTGTTGACAGTGAGCGACAGGTATAAAAAGGACAAGCATAGTGAAGCCACAGATGTATGCTTGTCCTTTTTATACCTGGTGCCTACTGCCTCGGA	Pool_12
28992	MACROD1.468	TGCTGTTGACAGTGAGCGACAAGGACTTTGTCAGGCTGAATAGTGAAGCCACAGATGTATTCAGCCTGACAAAGTCCTTGCTGCCTACTGCCTCGGA	Pool_12
28992	MACROD1.555	TGCTGTTGACAGTGAGCGCAAAGGACAAGCAGCTCAATGATAGTGAAGCCACAGATGTATCATTGAGCTGCTTGTCCTTTTTGCCTACTGCCTCGGA	Pool_12
5378	PMS1.591	TGCTGTTGACAGTGAGCGCTCGGTGGTCAGTGTTGTAAAATAGTGAAGCCACAGATGTATTTTACAACACTGACCACCGAATGCCTACTGCCTCGGA	Pool_12
5378	PMS1.2377	TGCTGTTGACAGTGAGCGCCAGCGAATGGTTTCAAGATAATAGTGAAGCCACAGATGTATTATCTTGAAACCATTCGCTGTTGCCTACTGCCTCGGA	Pool_12
5378	PMS1.1091	TGCTGTTGACAGTGAGCGCAAGGATTGTCTTTGTACATAATAGTGAAGCCACAGATGTATTATGTACAAAGACAATCCTTATGCCTACTGCCTCGGA	Pool_12
5378	PMS1.717	TGCTGTTGACAGTGAGCGAAAGGCTGTTGATGCACCTGTATAGTGAAGCCACAGATGTATACAGGTGCATCAACAGCCTTGTGCCTACTGCCTCGGA	Pool_12
5378	PMS1.504	TGCTGTTGACAGTGAGCGATAGCAGGAAGCTGCTCTGTTATAGTGAAGCCACAGATGTATAACAGAGCAGCTTCCTGCTAGTGCCTACTGCCTCGGA	Pool_12
5378	PMS1.2523	TGCTGTTGACAGTGAGCGCAAGGAAGTTTATGAATGTAGATAGTGAAGCCACAGATGTATCTACATTCATAAACTTCCTTTTGCCTACTGCCTCGGA	Pool_12
1027	CDKN1B.942	TGCTGTTGACAGTGAGCGCACCGACGATTCTTCTACTCAATAGTGAAGCCACAGATGTATTGAGTAGAAGAATCGTCGGTTTGCCTACTGCCTCGGA	Pool_12
1027	CDKN1B.2008	TGCTGTTGACAGTGAGCGCCAGGAAAGTGTTATTTTTCAATAGTGAAGCCACAGATGTATTGAAAAATAACACTTTCCTGTTGCCTACTGCCTCGGA	Pool_12
1027	CDKN1B.943	TGCTGTTGACAGTGAGCGCCCGACGATTCTTCTACTCAAATAGTGAAGCCACAGATGTATTTGAGTAGAAGAATCGTCGGTTGCCTACTGCCTCGGA	Pool_12
1027	CDKN1B.1898	TGCTGTTGACAGTGAGCGCCACAGTCAAAATAATTCTAAATAGTGAAGCCACAGATGTATTTAGAATTATTTTGACTGTGTTGCCTACTGCCTCGGA	Pool_12
1027	CDKN1B.2027	TGCTGTTGACAGTGAGCGAAAGGAAGGTTCATGTAGAGAATAGTGAAGCCACAGATGTATTCTCTACATGAACCTTCCTTGTGCCTACTGCCTCGGA	Pool_12
1027	CDKN1B.2028	TGCTGTTGACAGTGAGCGCAGGAAGGTTCATGTAGAGAAATAGTGAAGCCACAGATGTATTTCTCTACATGAACCTTCCTTTGCCTACTGCCTCGGA	Pool_12
5527	PPP2R5C.1200	TGCTGTTGACAGTGAGCGCTGGGTTAAAATAGAAAATCTATAGTGAAGCCACAGATGTATAGATTTTCTATTTTAACCCATTGCCTACTGCCTCGGA	Pool_12
5527	PPP2R5C.795	TGCTGTTGACAGTGAGCGCAAGACTCACAGTCCAAAAGAATAGTGAAGCCACAGATGTATTCTTTTGGACTGTGAGTCTTTTGCCTACTGCCTCGGA	Pool_12
5527	PPP2R5C.118	TGCTGTTGACAGTGAGCGCAACGAGCTGCTTTAAGTGAAATAGTGAAGCCACAGATGTATTTCACTTAAAGCAGCTCGTTTTGCCTACTGCCTCGGA	Pool_12
5527	PPP2R5C.828	TGCTGTTGACAGTGAGCGCAACGAATTAGAAGAGATTTTATAGTGAAGCCACAGATGTATAAAATCTCTTCTAATTCGTTTTGCCTACTGCCTCGGA	Pool_12
5527	PPP2R5C.1151	TGCTGTTGACAGTGAGCGCAGCAGAGAAACTAAAAGAGAATAGTGAAGCCACAGATGTATTCTCTTTTAGTTTCTCTGCTTTGCCTACTGCCTCGGA	Pool_12
5527	PPP2R5C.623	TGCTGTTGACAGTGAGCGCACCACTAAAAGAAGAGCACAATAGTGAAGCCACAGATGTATTGTGCTCTTCTTTTAGTGGTATGCCTACTGCCTCGGA	Pool_12
51548	SIRT6.1525	TGCTGTTGACAGTGAGCGCAAAGTCCTCAATGCAATAAAATAGTGAAGCCACAGATGTATTTTATTGCATTGAGGACTTTTTGCCTACTGCCTCGGA	Pool_12
51548	SIRT6.463	TGCTGTTGACAGTGAGCGCCGGGAACATGTTTGTGGAAGATAGTGAAGCCACAGATGTATCTTCCACAAACATGTTCCCGTTGCCTACTGCCTCGGA	Pool_12
51548	SIRT6.477	TGCTGTTGACAGTGAGCGATGGAAGAATGTGCCAAGTGTATAGTGAAGCCACAGATGTATACACTTGGCACATTCTTCCACTGCCTACTGCCTCGGA	Pool_12
51548	SIRT6.461	TGCTGTTGACAGTGAGCGACACGGGAACATGTTTGTGGAATAGTGAAGCCACAGATGTATTCCACAAACATGTTCCCGTGGTGCCTACTGCCTCGGA	Pool_12
51548	SIRT6.487	TGCTGTTGACAGTGAGCGATGCCAAGTGTAAGACGCAGTATAGTGAAGCCACAGATGTATACTGCGTCTTACACTTGGCACTGCCTACTGCCTCGGA	Pool_12
51548	SIRT6.1289	TGCTGTTGACAGTGAGCGACAGCCTCTGACTTGCTGTGTTTAGTGAAGCCACAGATGTAAACACAGCAAGTCAGAGGCTGGTGCCTACTGCCTCGGA	Pool_12
602	BCL3.1796	TGCTGTTGACAGTGAGCGAACGGATCACGATGTAAATTATTAGTGAAGCCACAGATGTAATAATTTACATCGTGATCCGTGTGCCTACTGCCTCGGA	Pool_12
602	BCL3.1795	TGCTGTTGACAGTGAGCGACACGGATCACGATGTAAATTATAGTGAAGCCACAGATGTATAATTTACATCGTGATCCGTGCTGCCTACTGCCTCGGA	Pool_12
602	BCL3.1802	TGCTGTTGACAGTGAGCGCCACGATGTAAATTATTAAGCATAGTGAAGCCACAGATGTATGCTTAATAATTTACATCGTGATGCCTACTGCCTCGGA	Pool_12
602	BCL3.1803	TGCTGTTGACAGTGAGCGAACGATGTAAATTATTAAGCATTAGTGAAGCCACAGATGTAATGCTTAATAATTTACATCGTGTGCCTACTGCCTCGGA	Pool_12
602	BCL3.560	TGCTGTTGACAGTGAGCGAGGAGCTCGACATCTACAACAATAGTGAAGCCACAGATGTATTGTTGTAGATGTCGAGCTCCCTGCCTACTGCCTCGGA	Pool_12
602	BCL3.1792	TGCTGTTGACAGTGAGCGAGGGCACGGATCACGATGTAAATAGTGAAGCCACAGATGTATTTACATCGTGATCCGTGCCCGTGCCTACTGCCTCGGA	Pool_12
3364	HUS1.457	TGCTGTTGACAGTGAGCGATGGAGCTGTTATCTATGTCAATAGTGAAGCCACAGATGTATTGACATAGATAACAGCTCCACTGCCTACTGCCTCGGA	Pool_12
3364	HUS1.822	TGCTGTTGACAGTGAGCGCCAGTTTCTTGCTGGACAACAATAGTGAAGCCACAGATGTATTGTTGTCCAGCAAGAAACTGTTGCCTACTGCCTCGGA	Pool_12
3364	HUS1.285	TGCTGTTGACAGTGAGCGCCAGGAGAACTTCTTCAACGAATAGTGAAGCCACAGATGTATTCGTTGAAGAAGTTCTCCTGTTGCCTACTGCCTCGGA	Pool_12
3364	HUS1.2698	TGCTGTTGACAGTGAGCGCTAGGATGGAATATTTTGTTAATAGTGAAGCCACAGATGTATTAACAAAATATTCCATCCTATTGCCTACTGCCTCGGA	Pool_12
3364	HUS1.1703	TGCTGTTGACAGTGAGCGAACCCTTCTATTTAGAGTAGAATAGTGAAGCCACAGATGTATTCTACTCTAAATAGAAGGGTCTGCCTACTGCCTCGGA	Pool_12
3364	HUS1.2794	TGCTGTTGACAGTGAGCGACAGCTGCAGTGAGAAAACTTATAGTGAAGCCACAGATGTATAAGTTTTCTCACTGCAGCTGGTGCCTACTGCCTCGGA	Pool_12
10783	NEK6.2070	TGCTGTTGACAGTGAGCGCCAGGATTAACTGTGAAGACTATAGTGAAGCCACAGATGTATAGTCTTCACAGTTAATCCTGTTGCCTACTGCCTCGGA	Pool_12
10783	NEK6.1892	TGCTGTTGACAGTGAGCGCCAGACAGAATTTGAAATAAAATAGTGAAGCCACAGATGTATTTTATTTCAAATTCTGTCTGTTGCCTACTGCCTCGGA	Pool_12
10783	NEK6.1915	TGCTGTTGACAGTGAGCGCTGCAAGTTAGCTAATACAAAATAGTGAAGCCACAGATGTATTTTGTATTAGCTAACTTGCATTGCCTACTGCCTCGGA	Pool_12
10783	NEK6.1891	TGCTGTTGACAGTGAGCGAACAGACAGAATTTGAAATAAATAGTGAAGCCACAGATGTATTTATTTCAAATTCTGTCTGTCTGCCTACTGCCTCGGA	Pool_12
10783	NEK6.2437	TGCTGTTGACAGTGAGCGATGGGAGTTACTTAGAATTCATTAGTGAAGCCACAGATGTAATGAATTCTAAGTAACTCCCAGTGCCTACTGCCTCGGA	Pool_12
10783	NEK6.699	TGCTGTTGACAGTGAGCGCCGGCTACAACTTCAAGTCCGATAGTGAAGCCACAGATGTATCGGACTTGAAGTTGTAGCCGTTGCCTACTGCCTCGGA	Pool_12
7291	TWIST1.1022	TGCTGTTGACAGTGAGCGAAAGGAGAAAATGGACAGTCTATAGTGAAGCCACAGATGTATAGACTGTCCATTTTCTCCTTCTGCCTACTGCCTCGGA	Pool_12
7291	TWIST1.811	TGCTGTTGACAGTGAGCGACAGGTACATCGACTTCCTCTATAGTGAAGCCACAGATGTATAGAGGAAGTCGATGTACCTGGTGCCTACTGCCTCGGA	Pool_12
7291	TWIST1.1105	TGCTGTTGACAGTGAGCGAAAGAGCAAAATCCAAATTCAATAGTGAAGCCACAGATGTATTGAATTTGGATTTTGCTCTTCTGCCTACTGCCTCGGA	Pool_12
7291	TWIST1.781	TGCTGTTGACAGTGAGCGCGAGCAAGATTCAGACCCTCAATAGTGAAGCCACAGATGTATTGAGGGTCTGAATCTTGCTCATGCCTACTGCCTCGGA	Pool_12
7291	TWIST1.770	TGCTGTTGACAGTGAGCGATCGGACAAGCTGAGCAAGATTTAGTGAAGCCACAGATGTAAATCTTGCTCAGCTTGTCCGAGTGCCTACTGCCTCGGA	Pool_12
7291	TWIST1.1577	TGCTGTTGACAGTGAGCGACGGTGTCTAAATGCATTCATATAGTGAAGCCACAGATGTATATGAATGCATTTAGACACCGGTGCCTACTGCCTCGGA	Pool_12
9907	KIAA0415.2524	TGCTGTTGACAGTGAGCGAAGGGACTTCGGTGCAGATTAATAGTGAAGCCACAGATGTATTAATCTGCACCGAAGTCCCTGTGCCTACTGCCTCGGA	Pool_12
9907	KIAA0415.2523	TGCTGTTGACAGTGAGCGACAGGGACTTCGGTGCAGATTATAGTGAAGCCACAGATGTATAATCTGCACCGAAGTCCCTGGTGCCTACTGCCTCGGA	Pool_12
9907	KIAA0415.5221	TGCTGTTGACAGTGAGCGCTAGACACTCTGTATCTAGCTATAGTGAAGCCACAGATGTATAGCTAGATACAGAGTGTCTATTGCCTACTGCCTCGGA	Pool_12
9907	KIAA0415.2072	TGCTGTTGACAGTGAGCGACACCGTGGAGCAGATCAACAATAGTGAAGCCACAGATGTATTGTTGATCTGCTCCACGGTGCTGCCTACTGCCTCGGA	Pool_12
9907	KIAA0415.2082	TGCTGTTGACAGTGAGCGACAGATCAACAAGTTCTTCGAATAGTGAAGCCACAGATGTATTCGAAGAACTTGTTGATCTGCTGCCTACTGCCTCGGA	Pool_12
9907	KIAA0415.5181	TGCTGTTGACAGTGAGCGCCAGCACCTTGTGTCTAGCTCATAGTGAAGCCACAGATGTATGAGCTAGACACAAGGTGCTGATGCCTACTGCCTCGGA	Pool_12
64859	OBFC2A.3291	TGCTGTTGACAGTGAGCGCCAGGTCATCAGTCATTAGTTATAGTGAAGCCACAGATGTATAACTAATGACTGATGACCTGATGCCTACTGCCTCGGA	Pool_12
64859	OBFC2A.2571	TGCTGTTGACAGTGAGCGACACAAGTTTATTTGTGGTCTATAGTGAAGCCACAGATGTATAGACCACAAATAAACTTGTGGTGCCTACTGCCTCGGA	Pool_12
64859	OBFC2A.2121	TGCTGTTGACAGTGAGCGACAGCTTTATTCAGAAATATAATAGTGAAGCCACAGATGTATTATATTTCTGAATAAAGCTGCTGCCTACTGCCTCGGA	Pool_12
64859	OBFC2A.1020	TGCTGTTGACAGTGAGCGAAAGGAACAGCTAGTAATCAAATAGTGAAGCCACAGATGTATTTGATTACTAGCTGTTCCTTGTGCCTACTGCCTCGGA	Pool_12
64859	OBFC2A.2749	TGCTGTTGACAGTGAGCGCTAGAGAGTATGTTTCATAAAATAGTGAAGCCACAGATGTATTTTATGAAACATACTCTCTATTGCCTACTGCCTCGGA	Pool_12
64859	OBFC2A.861	TGCTGTTGACAGTGAGCGACACAGAGTGAACAGAAGAATATAGTGAAGCCACAGATGTATATTCTTCTGTTCACTCTGTGCTGCCTACTGCCTCGGA	Pool_12
25842	ASF1A.345	TGCTGTTGACAGTGAGCGCAAGGTTCAGGTGAACAATGTATAGTGAAGCCACAGATGTATACATTGTTCACCTGAACCTTTTGCCTACTGCCTCGGA	Pool_12
25842	ASF1A.1326	TGCTGTTGACAGTGAGCGAAACAAAGTTTACTTCAACTAATAGTGAAGCCACAGATGTATTAGTTGAAGTAAACTTTGTTCTGCCTACTGCCTCGGA	Pool_12
25842	ASF1A.1322	TGCTGTTGACAGTGAGCGAAAAGAACAAAGTTTACTTCAATAGTGAAGCCACAGATGTATTGAAGTAAACTTTGTTCTTTCTGCCTACTGCCTCGGA	Pool_12
25842	ASF1A.909	TGCTGTTGACAGTGAGCGCAACTCACTAAATGTCATGTTATAGTGAAGCCACAGATGTATAACATGACATTTAGTGAGTTTTGCCTACTGCCTCGGA	Pool_12
25842	ASF1A.2373	TGCTGTTGACAGTGAGCGCTAACTAGTTCATAGATTTTAATAGTGAAGCCACAGATGTATTAAAATCTATGAACTAGTTAATGCCTACTGCCTCGGA	Pool_12
25842	ASF1A.1286	TGCTGTTGACAGTGAGCGACAGACAGTCTTTGGACCACTATAGTGAAGCCACAGATGTATAGTGGTCCAAAGACTGTCTGGTGCCTACTGCCTCGGA	Pool_12
8812	CCNK.2571	TGCTGTTGACAGTGAGCGCTCAGTCAGTTATCCAAATAAATAGTGAAGCCACAGATGTATTTATTTGGATAACTGACTGAATGCCTACTGCCTCGGA	Pool_12
8812	CCNK.2515	TGCTGTTGACAGTGAGCGCAAGTGTGAATGTAACAACATATAGTGAAGCCACAGATGTATATGTTGTTACATTCACACTTATGCCTACTGCCTCGGA	Pool_12
8812	CCNK.636	TGCTGTTGACAGTGAGCGCAAGCAACTCAAAGGTGATAAATAGTGAAGCCACAGATGTATTTATCACCTTTGAGTTGCTTTTGCCTACTGCCTCGGA	Pool_12
8812	CCNK.834	TGCTGTTGACAGTGAGCGATGGGAGCAGTTTGTTCAAGATTAGTGAAGCCACAGATGTAATCTTGAACAAACTGCTCCCACTGCCTACTGCCTCGGA	Pool_12
8812	CCNK.135	TGCTGTTGACAGTGAGCGAAAGGAGAATAAAGAAAATTCATAGTGAAGCCACAGATGTATGAATTTTCTTTATTCTCCTTCTGCCTACTGCCTCGGA	Pool_12
8812	CCNK.2572	TGCTGTTGACAGTGAGCGCCAGTCAGTTATCCAAATAAAATAGTGAAGCCACAGATGTATTTTATTTGGATAACTGACTGATGCCTACTGCCTCGGA	Pool_12
1454	CSNK1E.1966	TGCTGTTGACAGTGAGCGCCCCGTTCTCCTGTGTCTACTATAGTGAAGCCACAGATGTATAGTAGACACAGGAGAACGGGATGCCTACTGCCTCGGA	Pool_12
1454	CSNK1E.699	TGCTGTTGACAGTGAGCGCTCAGCGAGAAGAAGATGTCAATAGTGAAGCCACAGATGTATTGACATCTTCTTCTCGCTGATTGCCTACTGCCTCGGA	Pool_12
1454	CSNK1E.1355	TGCTGTTGACAGTGAGCGCACCACTCAAAAGAACAACAAATAGTGAAGCCACAGATGTATTTGTTGTTCTTTTGAGTGGTTTGCCTACTGCCTCGGA	Pool_12
1454	CSNK1E.694	TGCTGTTGACAGTGAGCGCACGGATCAGCGAGAAGAAGATTAGTGAAGCCACAGATGTAATCTTCTTCTCGCTGATCCGTTTGCCTACTGCCTCGGA	Pool_12
1454	CSNK1E.67	TGCTGTTGACAGTGAGCGACGGGTCCTTCGGAGATATCTATAGTGAAGCCACAGATGTATAGATATCTCCGAAGGACCCGCTGCCTACTGCCTCGGA	Pool_12
1454	CSNK1E.2392	TGCTGTTGACAGTGAGCGCAAGCTTTTTATTACTTTGTAATAGTGAAGCCACAGATGTATTACAAAGTAATAAAAAGCTTTTGCCTACTGCCTCGGA	Pool_12
3014	H2AFX.1434	TGCTGTTGACAGTGAGCGAAAGCACCTAGATACCAGCACATAGTGAAGCCACAGATGTATGTGCTGGTATCTAGGTGCTTGTGCCTACTGCCTCGGA	Pool_12
3014	H2AFX.1555	TGCTGTTGACAGTGAGCGCTAGATGGACTAATTTTATTAATAGTGAAGCCACAGATGTATTAATAAAATTAGTCCATCTAATGCCTACTGCCTCGGA	Pool_12
3014	H2AFX.22	TGCTGTTGACAGTGAGCGAGGCGTCTGTTCTAGTGTTTGATAGTGAAGCCACAGATGTATCAAACACTAGAACAGACGCCCTGCCTACTGCCTCGGA	Pool_12
3014	H2AFX.1524	TGCTGTTGACAGTGAGCGACACGACTAGAACCTTAGGCATTAGTGAAGCCACAGATGTAATGCCTAAGGTTCTAGTCGTGGTGCCTACTGCCTCGGA	Pool_12
3014	H2AFX.20	TGCTGTTGACAGTGAGCGACGGGCGTCTGTTCTAGTGTTTTAGTGAAGCCACAGATGTAAAACACTAGAACAGACGCCCGCTGCCTACTGCCTCGGA	Pool_12
3014	H2AFX.1435	TGCTGTTGACAGTGAGCGCAGCACCTAGATACCAGCACAATAGTGAAGCCACAGATGTATTGTGCTGGTATCTAGGTGCTTTGCCTACTGCCTCGGA	Pool_12
51147	ING4.556	TGCTGTTGACAGTGAGCGAAACGGAAGAAGAAATAGATAATAGTGAAGCCACAGATGTATTATCTATTTCTTCTTCCGTTCTGCCTACTGCCTCGGA	Pool_12
51147	ING4.1194	TGCTGTTGACAGTGAGCGATAGAGACACTGTTTTAGTAAATAGTGAAGCCACAGATGTATTTACTAAAACAGTGTCTCTACTGCCTACTGCCTCGGA	Pool_12
51147	ING4.363	TGCTGTTGACAGTGAGCGACCGGACTCAAAAGGAGAAGAATAGTGAAGCCACAGATGTATTCTTCTCCTTTTGAGTCCGGCTGCCTACTGCCTCGGA	Pool_12
51147	ING4.319	TGCTGTTGACAGTGAGCGCCAGATTGAGTCAAGTGACTATTAGTGAAGCCACAGATGTAATAGTCACTTGACTCAATCTGTTGCCTACTGCCTCGGA	Pool_12
51147	ING4.1147	TGCTGTTGACAGTGAGCGCTGGGTAGGTAAATAAAAGCTATAGTGAAGCCACAGATGTATAGCTTTTATTTACCTACCCAATGCCTACTGCCTCGGA	Pool_12
51147	ING4.310	TGCTGTTGACAGTGAGCGAAAGGAGAAACAGATTGAGTCATAGTGAAGCCACAGATGTATGACTCAATCTGTTTCTCCTTGTGCCTACTGCCTCGGA	Pool_12
23028	KDM1A.1031	TGCTGTTGACAGTGAGCGACAGCAGCTCGACAGTTACAAATAGTGAAGCCACAGATGTATTTGTAACTGTCGAGCTGCTGCTGCCTACTGCCTCGGA	Pool_12
23028	KDM1A.904	TGCTGTTGACAGTGAGCGACACCGAGTTCACAGTTATTTATAGTGAAGCCACAGATGTATAAATAACTGTGAACTCGGTGGTGCCTACTGCCTCGGA	Pool_12
23028	KDM1A.2772	TGCTGTTGACAGTGAGCGAAAGGCTCTTCTAGCAATACTATAGTGAAGCCACAGATGTATAGTATTGCTAGAAGAGCCTTCTGCCTACTGCCTCGGA	Pool_12
23028	KDM1A.1034	TGCTGTTGACAGTGAGCGACAGCTCGACAGTTACAAAGTTTAGTGAAGCCACAGATGTAAACTTTGTAACTGTCGAGCTGCTGCCTACTGCCTCGGA	Pool_12
23028	KDM1A.1587	TGCTGTTGACAGTGAGCGACGAGTTCTTAGTGAAAAGCAATAGTGAAGCCACAGATGTATTGCTTTTCACTAAGAACTCGGTGCCTACTGCCTCGGA	Pool_12
23028	KDM1A.1316	TGCTGTTGACAGTGAGCGATAGAAGCTACATCTTACCTTATAGTGAAGCCACAGATGTATAAGGTAAGATGTAGCTTCTAGTGCCTACTGCCTCGGA	Pool_12
23054	NCOA6.4926	TGCTGTTGACAGTGAGCGACAGGATCTGTCTTCTTCTAAATAGTGAAGCCACAGATGTATTTAGAAGAAGACAGATCCTGCTGCCTACTGCCTCGGA	Pool_12
23054	NCOA6.6985	TGCTGTTGACAGTGAGCGCAAGGATTTGTACAATGTGAAATAGTGAAGCCACAGATGTATTTCACATTGTACAAATCCTTATGCCTACTGCCTCGGA	Pool_12
23054	NCOA6.6496	TGCTGTTGACAGTGAGCGCAGCGAAGAAAATCCAAGTAAATAGTGAAGCCACAGATGTATTTACTTGGATTTTCTTCGCTTTGCCTACTGCCTCGGA	Pool_12
23054	NCOA6.4629	TGCTGTTGACAGTGAGCGCCAGGTAAACATTGAACTAAAATAGTGAAGCCACAGATGTATTTTAGTTCAATGTTTACCTGTTGCCTACTGCCTCGGA	Pool_12
23054	NCOA6.6650	TGCTGTTGACAGTGAGCGAAACCTGTTTCATAAAGTGCAATAGTGAAGCCACAGATGTATTGCACTTTATGAAACAGGTTGTGCCTACTGCCTCGGA	Pool_12
23054	NCOA6.1107	TGCTGTTGACAGTGAGCGACAGCAGCAGCAACAACAACAATAGTGAAGCCACAGATGTATTGTTGTTGTTGCTGCTGCTGCTGCCTACTGCCTCGGA	Pool_12
5695	PSMB7.213	TGCTGTTGACAGTGAGCGCAGGGATGGTTGTTGCTGACAATAGTGAAGCCACAGATGTATTGTCAGCAACAACCATCCCTTTGCCTACTGCCTCGGA	Pool_12
5695	PSMB7.400	TGCTGTTGACAGTGAGCGACAGATGCTTTTCAGGTATCAATAGTGAAGCCACAGATGTATTGATACCTGAAAAGCATCTGCTGCCTACTGCCTCGGA	Pool_12
5695	PSMB7.936	TGCTGTTGACAGTGAGCGACCGAATGAAACTCAACTCAATTAGTGAAGCCACAGATGTAATTGAGTTGAGTTTCATTCGGCTGCCTACTGCCTCGGA	Pool_12
5695	PSMB7.935	TGCTGTTGACAGTGAGCGCGCCGAATGAAACTCAACTCAATAGTGAAGCCACAGATGTATTGAGTTGAGTTTCATTCGGCATGCCTACTGCCTCGGA	Pool_12
5695	PSMB7.923	TGCTGTTGACAGTGAGCGATGGCTAGTGTTTGCCGAATGATAGTGAAGCCACAGATGTATCATTCGGCAAACACTAGCCACTGCCTACTGCCTCGGA	Pool_12
5695	PSMB7.818	TGCTGTTGACAGTGAGCGATGGAAGAAACAGTCCAAACAATAGTGAAGCCACAGATGTATTGTTTGGACTGTTTCTTCCAGTGCCTACTGCCTCGGA	Pool_12
10432	RBM14.1421	TGCTGTTGACAGTGAGCGACAGGAAGACATGATAGCTAAATAGTGAAGCCACAGATGTATTTAGCTATCATGTCTTCCTGGTGCCTACTGCCTCGGA	Pool_12
10432	RBM14.3764	TGCTGTTGACAGTGAGCGATGGGTTTTATGTCTAGATTTATAGTGAAGCCACAGATGTATAAATCTAGACATAAAACCCAGTGCCTACTGCCTCGGA	Pool_12
10432	RBM14.1281	TGCTGTTGACAGTGAGCGACAAGTAGGTGGTGTTAGAAAATAGTGAAGCCACAGATGTATTTTCTAACACCACCTACTTGGTGCCTACTGCCTCGGA	Pool_12
10432	RBM14.1420	TGCTGTTGACAGTGAGCGCCCAGGAAGACATGATAGCTAATAGTGAAGCCACAGATGTATTAGCTATCATGTCTTCCTGGATGCCTACTGCCTCGGA	Pool_12
10432	RBM14.3650	TGCTGTTGACAGTGAGCGAGACCTAGTATATACTATGTAATAGTGAAGCCACAGATGTATTACATAGTATATACTAGGTCCTGCCTACTGCCTCGGA	Pool_12
10432	RBM14.1315	TGCTGTTGACAGTGAGCGCTCCCTTTTGTATGGACTACAATAGTGAAGCCACAGATGTATTGTAGTCCATACAAAAGGGAATGCCTACTGCCTCGGA	Pool_12
64326	RFWD2.1858	TGCTGTTGACAGTGAGCGCAGGCTAATGTGTGCTGTGTTATAGTGAAGCCACAGATGTATAACACAGCACACATTAGCCTTTGCCTACTGCCTCGGA	Pool_12
64326	RFWD2.1517	TGCTGTTGACAGTGAGCGCTACAAAGAAGATTAAAGTCTATAGTGAAGCCACAGATGTATAGACTTTAATCTTCTTTGTAATGCCTACTGCCTCGGA	Pool_12
64326	RFWD2.2268	TGCTGTTGACAGTGAGCGCAAAGAAGATGATACAAATGAATAGTGAAGCCACAGATGTATTCATTTGTATCATCTTCTTTTTGCCTACTGCCTCGGA	Pool_12
64326	RFWD2.1511	TGCTGTTGACAGTGAGCGATGGAGTTACAAAGAAGATTAATAGTGAAGCCACAGATGTATTAATCTTCTTTGTAACTCCAGTGCCTACTGCCTCGGA	Pool_12
64326	RFWD2.1297	TGCTGTTGACAGTGAGCGAAGCAGTGTTACTTTTCTACAATAGTGAAGCCACAGATGTATTGTAGAAAAGTAACACTGCTCTGCCTACTGCCTCGGA	Pool_12
64326	RFWD2.2263	TGCTGTTGACAGTGAGCGAACCGAAAAGAAGATGATACAATAGTGAAGCCACAGATGTATTGTATCATCTTCTTTTCGGTCTGCCTACTGCCTCGGA	Pool_12
6233	RPS27A.733	TGCTGTTGACAGTGAGCGACAGAAGTTATATTTAATGTAATAGTGAAGCCACAGATGTATTACATTAAATATAACTTCTGCTGCCTACTGCCTCGGA	Pool_12
6233	RPS27A.80	TGCTGTTGACAGTGAGCGCCGGATACGATAGAAAATGTAATAGTGAAGCCACAGATGTATTACATTTTCTATCGTATCCGATGCCTACTGCCTCGGA	Pool_12
6233	RPS27A.75	TGCTGTTGACAGTGAGCGCACCCTCGGATACGATAGAAAATAGTGAAGCCACAGATGTATTTTCTATCGTATCCGAGGGTTTGCCTACTGCCTCGGA	Pool_12
6233	RPS27A.340	TGCTGTTGACAGTGAGCGCAAGGTGGATGAGAATGGCAAATAGTGAAGCCACAGATGTATTTGCCATTCTCATCCACCTTATGCCTACTGCCTCGGA	Pool_12
6233	RPS27A.477	TGCTGTTGACAGTGAGCGCACCAGAAGACAAGTAACTGTATAGTGAAGCCACAGATGTATACAGTTACTTGTCTTCTGGTTTGCCTACTGCCTCGGA	Pool_12
6233	RPS27A.282	TGCTGTTGACAGTGAGCGATCCCAAGAAGAATAAGCACAATAGTGAAGCCACAGATGTATTGTGCTTATTCTTCTTGGGAGTGCCTACTGCCTCGGA	Pool_12
56916	SMARCAD1.2661	TGCTGTTGACAGTGAGCGAAAGGGTGATAGAGTTGTGTTATAGTGAAGCCACAGATGTATAACACAACTCTATCACCCTTCTGCCTACTGCCTCGGA	Pool_12
56916	SMARCAD1.1401	TGCTGTTGACAGTGAGCGACAAGAAAGAGATGTAGTTATATAGTGAAGCCACAGATGTATATAACTACATCTCTTTCTTGGTGCCTACTGCCTCGGA	Pool_12
56916	SMARCAD1.2110	TGCTGTTGACAGTGAGCGCTACGAAGAATGTTTTCCTCTATAGTGAAGCCACAGATGTATAGAGGAAAACATTCTTCGTATTGCCTACTGCCTCGGA	Pool_12
56916	SMARCAD1.807	TGCTGTTGACAGTGAGCGACAGGAAAGTATTGTACTGAAATAGTGAAGCCACAGATGTATTTCAGTACAATACTTTCCTGCTGCCTACTGCCTCGGA	Pool_12
56916	SMARCAD1.1337	TGCTGTTGACAGTGAGCGCCACAAAGATGTCCAAAACTAATAGTGAAGCCACAGATGTATTAGTTTTGGACATCTTTGTGATGCCTACTGCCTCGGA	Pool_12
56916	SMARCAD1.1284	TGCTGTTGACAGTGAGCGCAAGGCTCAGAAGATAACAGAATAGTGAAGCCACAGATGTATTCTGTTATCTTCTGAGCCTTTTGCCTACTGCCTCGGA	Pool_12
9126	SMC3.1337	TGCTGTTGACAGTGAGCGCCAGGCTATTAATGACAAGAAATAGTGAAGCCACAGATGTATTTCTTGTCATTAATAGCCTGATGCCTACTGCCTCGGA	Pool_12
9126	SMC3.1442	TGCTGTTGACAGTGAGCGACAGGATCTTAATGAAGTCAAATAGTGAAGCCACAGATGTATTTGACTTCATTAAGATCCTGGTGCCTACTGCCTCGGA	Pool_12
9126	SMC3.995	TGCTGTTGACAGTGAGCGCCAGCTTAGTGCTGAAAGACAATAGTGAAGCCACAGATGTATTGTCTTTCAGCACTAAGCTGTTGCCTACTGCCTCGGA	Pool_12
9126	SMC3.905	TGCTGTTGACAGTGAGCGCCAGCAGGATGCAAGAGATAAATAGTGAAGCCACAGATGTATTTATCTCTTGCATCCTGCTGATGCCTACTGCCTCGGA	Pool_12
9126	SMC3.860	TGCTGTTGACAGTGAGCGCAAGCGAGAGACTAGTGGAGAATAGTGAAGCCACAGATGTATTCTCCACTAGTCTCTCGCTTATGCCTACTGCCTCGGA	Pool_12
9126	SMC3.3107	TGCTGTTGACAGTGAGCGATCCGAGCAGAAAGAAAAGTTATAGTGAAGCCACAGATGTATAACTTTTCTTTCTGCTCGGAGTGCCTACTGCCTCGGA	Pool_12
23049	SMG1.16041	TGCTGTTGACAGTGAGCGCAAGGTTCAGTCTCAAAAGATATAGTGAAGCCACAGATGTATATCTTTTGAGACTGAACCTTTTGCCTACTGCCTCGGA	Pool_12
23049	SMG1.12438	TGCTGTTGACAGTGAGCGCTACATTGTTGATGATAGATTATAGTGAAGCCACAGATGTATAATCTATCATCAACAATGTAATGCCTACTGCCTCGGA	Pool_12
23049	SMG1.1653	TGCTGTTGACAGTGAGCGCCAGATGTTCTGTACAGAGTAATAGTGAAGCCACAGATGTATTACTCTGTACAGAACATCTGTTGCCTACTGCCTCGGA	Pool_12
23049	SMG1.14585	TGCTGTTGACAGTGAGCGAAGGGTTTGTAATACAAAGAAATAGTGAAGCCACAGATGTATTTCTTTGTATTACAAACCCTCTGCCTACTGCCTCGGA	Pool_12
23049	SMG1.8964	TGCTGTTGACAGTGAGCGACAGAAGCACTTCGATGTTTAATAGTGAAGCCACAGATGTATTAAACATCGAAGTGCTTCTGGTGCCTACTGCCTCGGA	Pool_12
23049	SMG1.1877	TGCTGTTGACAGTGAGCGAACGCTGATTGTTGAACAGATATAGTGAAGCCACAGATGTATATCTGTTCAACAATCAGCGTGTGCCTACTGCCTCGGA	Pool_12
57551	TAOK1.10008	TGCTGTTGACAGTGAGCGATCGGATGTAAATAACATTTAATAGTGAAGCCACAGATGTATTAAATGTTATTTACATCCGACTGCCTACTGCCTCGGA	Pool_12
57551	TAOK1.421	TGCTGTTGACAGTGAGCGCAAGGAAGTCAAGTTTCTACAATAGTGAAGCCACAGATGTATTGTAGAAACTTGACTTCCTTATGCCTACTGCCTCGGA	Pool_12
57551	TAOK1.4803	TGCTGTTGACAGTGAGCGCCACCATAGAGTTCACACAAAATAGTGAAGCCACAGATGTATTTTGTGTGAACTCTATGGTGATGCCTACTGCCTCGGA	Pool_12
57551	TAOK1.11517	TGCTGTTGACAGTGAGCGCTACCAAGTTGTCAGAACATAATAGTGAAGCCACAGATGTATTATGTTCTGACAACTTGGTAATGCCTACTGCCTCGGA	Pool_12
57551	TAOK1.10050	TGCTGTTGACAGTGAGCGACCGGACTGTTCCAATCTGATATAGTGAAGCCACAGATGTATATCAGATTGGAACAGTCCGGGTGCCTACTGCCTCGGA	Pool_12
57551	TAOK1.11459	TGCTGTTGACAGTGAGCGCTACCTTATAGTTCATATATAATAGTGAAGCCACAGATGTATTATATATGAACTATAAGGTATTGCCTACTGCCTCGGA	Pool_12
7158	TP53BP1.746	TGCTGTTGACAGTGAGCGCAAGGATGTACATGTTGTAAAATAGTGAAGCCACAGATGTATTTTACAACATGTACATCCTTATGCCTACTGCCTCGGA	Pool_12
7158	TP53BP1.5912	TGCTGTTGACAGTGAGCGCCACGATTATGTTTCTCACTAATAGTGAAGCCACAGATGTATTAGTGAGAAACATAATCGTGTTGCCTACTGCCTCGGA	Pool_12
7158	TP53BP1.5913	TGCTGTTGACAGTGAGCGAACGATTATGTTTCTCACTAAATAGTGAAGCCACAGATGTATTTAGTGAGAAACATAATCGTGTGCCTACTGCCTCGGA	Pool_12
7158	TP53BP1.2429	TGCTGTTGACAGTGAGCGAAAGGAAGAAAAGAGTGTAGAATAGTGAAGCCACAGATGTATTCTACACTCTTTTCTTCCTTGTGCCTACTGCCTCGGA	Pool_12
7158	TP53BP1.1796	TGCTGTTGACAGTGAGCGAAGGGATGACATTAGTATTTTATAGTGAAGCCACAGATGTATAAAATACTAATGTCATCCCTGTGCCTACTGCCTCGGA	Pool_12
7158	TP53BP1.3222	TGCTGTTGACAGTGAGCGAAAGGAGAAGAGGAGAAAGAAATAGTGAAGCCACAGATGTATTTCTTTCTCCTCTTCTCCTTGTGCCTACTGCCTCGGA	Pool_12
56897	WRNIP1.1484	TGCTGTTGACAGTGAGCGATAGGAAGATGTTCTGTAAGAATAGTGAAGCCACAGATGTATTCTTACAGAACATCTTCCTAGTGCCTACTGCCTCGGA	Pool_12
56897	WRNIP1.1373	TGCTGTTGACAGTGAGCGACGCCATGTTCATAGAGGATAATAGTGAAGCCACAGATGTATTATCCTCTATGAACATGGCGGTGCCTACTGCCTCGGA	Pool_12
56897	WRNIP1.1229	TGCTGTTGACAGTGAGCGATCGAGTGATTGTTCTTGAGAATAGTGAAGCCACAGATGTATTCTCAAGAACAATCACTCGACTGCCTACTGCCTCGGA	Pool_12
56897	WRNIP1.2540	TGCTGTTGACAGTGAGCGCAAGGTCTTACGAGCCAATAAATAGTGAAGCCACAGATGTATTTATTGGCTCGTAAGACCTTTTGCCTACTGCCTCGGA	Pool_12
56897	WRNIP1.2127	TGCTGTTGACAGTGAGCGCCAGCAGAAGGATGTTGCTTTTTAGTGAAGCCACAGATGTAAAAAGCAACATCCTTCTGCTGTTGCCTACTGCCTCGGA	Pool_12
56897	WRNIP1.2342	TGCTGTTGACAGTGAGCGACAGCTTTGTGCAATGAATTAATAGTGAAGCCACAGATGTATTAATTCATTGCACAAAGCTGCTGCCTACTGCCTCGGA	Pool_12
221120	ALKBH3.597	TGCTGTTGACAGTGAGCGCCAGAGAGTTTGTGTTCAAAGATAGTGAAGCCACAGATGTATCTTTGAACACAAACTCTCTGTTGCCTACTGCCTCGGA	Pool_12
221120	ALKBH3.396	TGCTGTTGACAGTGAGCGCCAGGAACAAAATCTTCTGAAATAGTGAAGCCACAGATGTATTTCAGAAGATTTTGTTCCTGTTGCCTACTGCCTCGGA	Pool_12
221120	ALKBH3.594	TGCTGTTGACAGTGAGCGATGACAGAGAGTTTGTGTTCAATAGTGAAGCCACAGATGTATTGAACACAAACTCTCTGTCAGTGCCTACTGCCTCGGA	Pool_12
221120	ALKBH3.598	TGCTGTTGACAGTGAGCGAAGAGAGTTTGTGTTCAAAGAATAGTGAAGCCACAGATGTATTCTTTGAACACAAACTCTCTGTGCCTACTGCCTCGGA	Pool_12
221120	ALKBH3.1080	TGCTGTTGACAGTGAGCGAACGCACATTTGAGATGAGAAATAGTGAAGCCACAGATGTATTTCTCATCTCAAATGTGCGTGTGCCTACTGCCTCGGA	Pool_12
221120	ALKBH3.811	TGCTGTTGACAGTGAGCGCGAGGATATAACTTATCAGCAATAGTGAAGCCACAGATGTATTGCTGATAAGTTATATCCTCTTGCCTACTGCCTCGGA	Pool_12
83990	BRIP1.7789	TGCTGTTGACAGTGAGCGCAAGGTAGAGATTGTTTATCAATAGTGAAGCCACAGATGTATTGATAAACAATCTCTACCTTATGCCTACTGCCTCGGA	Pool_12
83990	BRIP1.2011	TGCTGTTGACAGTGAGCGCTGGGTTGTTGGTTCTACCAAATAGTGAAGCCACAGATGTATTTGGTAGAACCAACAACCCATTGCCTACTGCCTCGGA	Pool_12
83990	BRIP1.1469	TGCTGTTGACAGTGAGCGCCAGGTTGTCATTTTAGATGAATAGTGAAGCCACAGATGTATTCATCTAAAATGACAACCTGTTGCCTACTGCCTCGGA	Pool_12
83990	BRIP1.952	TGCTGTTGACAGTGAGCGATAGGTGCTGTTGTTCTACTAATAGTGAAGCCACAGATGTATTAGTAGAACAACAGCACCTAGTGCCTACTGCCTCGGA	Pool_12
83990	BRIP1.1988	TGCTGTTGACAGTGAGCGCCAGATTGATATTTCAGACAAATAGTGAAGCCACAGATGTATTTGTCTGAAATATCAATCTGATGCCTACTGCCTCGGA	Pool_12
83990	BRIP1.2684	TGCTGTTGACAGTGAGCGCCAGGTTGAACTAAAACGACAATAGTGAAGCCACAGATGTATTGTCGTTTTAGTTCAACCTGTTGCCTACTGCCTCGGA	Pool_12
91442	C19orf40.617	TGCTGTTGACAGTGAGCGCCCCAGGAGTTGGAAAAGTTAATAGTGAAGCCACAGATGTATTAACTTTTCCAACTCCTGGGATGCCTACTGCCTCGGA	Pool_12
91442	C19orf40.814	TGCTGTTGACAGTGAGCGACAGGATCTTGTTTTCAGCTTTTAGTGAAGCCACAGATGTAAAAGCTGAAAACAAGATCCTGGTGCCTACTGCCTCGGA	Pool_12
91442	C19orf40.618	TGCTGTTGACAGTGAGCGACCAGGAGTTGGAAAAGTTAAATAGTGAAGCCACAGATGTATTTAACTTTTCCAACTCCTGGGTGCCTACTGCCTCGGA	Pool_12
91442	C19orf40.616	TGCTGTTGACAGTGAGCGCTCCCAGGAGTTGGAAAAGTTATAGTGAAGCCACAGATGTATAACTTTTCCAACTCCTGGGATTGCCTACTGCCTCGGA	Pool_12
91442	C19orf40.322	TGCTGTTGACAGTGAGCGACAGGAAATGGCTACAGAAAGATAGTGAAGCCACAGATGTATCTTTCTGTAGCCATTTCCTGCTGCCTACTGCCTCGGA	Pool_12
91442	C19orf40.351	TGCTGTTGACAGTGAGCGCCGGGTTAGAAATTCCAATAATTAGTGAAGCCACAGATGTAATTATTGGAATTTCTAACCCGATGCCTACTGCCTCGGA	Pool_12
1029	CDKN2A.757	TGCTGTTGACAGTGAGCGACAGAACCAAAGCTCAAATAAATAGTGAAGCCACAGATGTATTTATTTGAGCTTTGGTTCTGCTGCCTACTGCCTCGGA	Pool_12
1029	CDKN2A.320	TGCTGTTGACAGTGAGCGACCCGATTGAAAGAACCAGAGATAGTGAAGCCACAGATGTATCTCTGGTTCTTTCAATCGGGGTGCCTACTGCCTCGGA	Pool_12
1029	CDKN2A.503	TGCTGTTGACAGTGAGCGATACCGTAAATGTCCATTTATATAGTGAAGCCACAGATGTATATAAATGGACATTTACGGTAGTGCCTACTGCCTCGGA	Pool_12
1029	CDKN2A.429	TGCTGTTGACAGTGAGCGCTCGTAGTTTTCATTTAGAAAATAGTGAAGCCACAGATGTATTTTCTAAATGAAAACTACGAATGCCTACTGCCTCGGA	Pool_12
1029	CDKN2A.424	TGCTGTTGACAGTGAGCGACGCTTTCGTAGTTTTCATTTATAGTGAAGCCACAGATGTATAAATGAAAACTACGAAAGCGGTGCCTACTGCCTCGGA	Pool_12
1029	CDKN2A.665	TGCTGTTGACAGTGAGCGACGGAAGCTGTCGACTTCATGATAGTGAAGCCACAGATGTATCATGAAGTCGACAGCTTCCGGTGCCTACTGCCTCGGA	Pool_12
10036	CHAF1A.1388	TGCTGTTGACAGTGAGCGCACGGTTAAGAGAAGAAGAGAATAGTGAAGCCACAGATGTATTCTCTTCTTCTCTTAACCGTTTGCCTACTGCCTCGGA	Pool_12
10036	CHAF1A.3082	TGCTGTTGACAGTGAGCGACCCAAAGTGTGCAGAGTTCTATAGTGAAGCCACAGATGTATAGAACTCTGCACACTTTGGGGTGCCTACTGCCTCGGA	Pool_12
10036	CHAF1A.183	TGCTGTTGACAGTGAGCGCCCAGTTAAGAAGTTAATACAATAGTGAAGCCACAGATGTATTGTATTAACTTCTTAACTGGATGCCTACTGCCTCGGA	Pool_12
10036	CHAF1A.1374	TGCTGTTGACAGTGAGCGCAAGGAAGAAGAGAAACGGTTATAGTGAAGCCACAGATGTATAACCGTTTCTCTTCTTCCTTTTGCCTACTGCCTCGGA	Pool_12
10036	CHAF1A.3032	TGCTGTTGACAGTGAGCGCACCGACTCAATTCCTGTGTAATAGTGAAGCCACAGATGTATTACACAGGAATTGAGTCGGTTTGCCTACTGCCTCGGA	Pool_12
10036	CHAF1A.1140	TGCTGTTGACAGTGAGCGACAGCTCAAGTTACGTGCAGAATAGTGAAGCCACAGATGTATTCTGCACGTAACTTGAGCTGCTGCCTACTGCCTCGGA	Pool_12
1191	CLU.1959	TGCTGTTGACAGTGAGCGCAAGGAATACACTGAAAGTTAATAGTGAAGCCACAGATGTATTAACTTTCAGTGTATTCCTTTTGCCTACTGCCTCGGA	Pool_12
1191	CLU.1848	TGCTGTTGACAGTGAGCGAAAGAGAGATGTGTTTCAACAATAGTGAAGCCACAGATGTATTGTTGAAACACATCTCTCTTCTGCCTACTGCCTCGGA	Pool_12
1191	CLU.155	TGCTGTTGACAGTGAGCGATACGTCAATAAGGAAATTCAATAGTGAAGCCACAGATGTATTGAATTTCCTTATTGACGTACTGCCTACTGCCTCGGA	Pool_12
1191	CLU.1844	TGCTGTTGACAGTGAGCGCCAGGAAGAGAGATGTGTTTCATAGTGAAGCCACAGATGTATGAAACACATCTCTCTTCCTGATGCCTACTGCCTCGGA	Pool_12
1191	CLU.1897	TGCTGTTGACAGTGAGCGAAAGCTTTTCTGTTCTATTATATAGTGAAGCCACAGATGTATATAATAGAACAGAAAAGCTTCTGCCTACTGCCTCGGA	Pool_12
1191	CLU.1940	TGCTGTTGACAGTGAGCGAAAGGTGCGACAATCTCCTAAATAGTGAAGCCACAGATGTATTTAGGAGATTGTCGCACCTTGTGCCTACTGCCTCGGA	Pool_12
1649	DDIT3.113	TGCTGTTGACAGTGAGCGAAAGGAAGTGTATCTTCATACATAGTGAAGCCACAGATGTATGTATGAAGATACACTTCCTTCTGCCTACTGCCTCGGA	Pool_12
1649	DDIT3.94	TGCTGTTGACAGTGAGCGATGAGGAGAGAGTGTTCAAGAATAGTGAAGCCACAGATGTATTCTTGAACACTCTCTCCTCAGTGCCTACTGCCTCGGA	Pool_12
1649	DDIT3.833	TGCTGTTGACAGTGAGCGCCAGCTTGTATATAGAGATTGTTAGTGAAGCCACAGATGTAACAATCTCTATATACAAGCTGATGCCTACTGCCTCGGA	Pool_12
1649	DDIT3.252	TGCTGTTGACAGTGAGCGCGAGGTCCTGTCTTCAGATGAATAGTGAAGCCACAGATGTATTCATCTGAAGACAGGACCTCTTGCCTACTGCCTCGGA	Pool_12
1649	DDIT3.6	TGCTGTTGACAGTGAGCGAAGGTCAGAGACTTAAGTCTAATAGTGAAGCCACAGATGTATTAGACTTAAGTCTCTGACCTCTGCCTACTGCCTCGGA	Pool_12
151636	DTX3L.4927	TGCTGTTGACAGTGAGCGCACGGTTCTTCAAGTCAGATTATAGTGAAGCCACAGATGTATAATCTGACTTGAAGAACCGTTTGCCTACTGCCTCGGA	Pool_12
151636	DTX3L.3497	TGCTGTTGACAGTGAGCGCTAGTCTGTTTGTGTTGCTATATAGTGAAGCCACAGATGTATATAGCAACACAAACAGACTAATGCCTACTGCCTCGGA	Pool_12
151636	DTX3L.4710	TGCTGTTGACAGTGAGCGACAGGTTTAACAGACAAAATAATAGTGAAGCCACAGATGTATTATTTTGTCTGTTAAACCTGGTGCCTACTGCCTCGGA	Pool_12
151636	DTX3L.1591	TGCTGTTGACAGTGAGCGCAAGGCGAAGCAGTATGTTCTATAGTGAAGCCACAGATGTATAGAACATACTGCTTCGCCTTTTGCCTACTGCCTCGGA	Pool_12
151636	DTX3L.1006	TGCTGTTGACAGTGAGCGAAAGCAAGAATGTGTCTCTTTATAGTGAAGCCACAGATGTATAAAGAGACACATTCTTGCTTCTGCCTACTGCCTCGGA	Pool_12
151636	DTX3L.4053	TGCTGTTGACAGTGAGCGCAAGAGACAAGTCCTTACTATATAGTGAAGCCACAGATGTATATAGTAAGGACTTGTCTCTTATGCCTACTGCCTCGGA	Pool_12
1869	E2F1.919	TGCTGTTGACAGTGAGCGACAGATGGTTATGGTGATCAAATAGTGAAGCCACAGATGTATTTGATCACCATAACCATCTGCTGCCTACTGCCTCGGA	Pool_12
1869	E2F1.918	TGCTGTTGACAGTGAGCGCGCAGATGGTTATGGTGATCAATAGTGAAGCCACAGATGTATTGATCACCATAACCATCTGCTTGCCTACTGCCTCGGA	Pool_12
1869	E2F1.1538	TGCTGTTGACAGTGAGCGACAGCCTGTTTGGAAACATTTATAGTGAAGCCACAGATGTATAAATGTTTCCAAACAGGCTGGTGCCTACTGCCTCGGA	Pool_12
1869	E2F1.2681	TGCTGTTGACAGTGAGCGCCCAGTAAAGGTTTTTGTTGTATAGTGAAGCCACAGATGTATACAACAAAAACCTTTACTGGATGCCTACTGCCTCGGA	Pool_12
1869	E2F1.908	TGCTGTTGACAGTGAGCGAACCCTGCAGAGCAGATGGTTATAGTGAAGCCACAGATGTATAACCATCTGCTCTGCAGGGTCTGCCTACTGCCTCGGA	Pool_12
1869	E2F1.1643	TGCTGTTGACAGTGAGCGCAGGAGTCTGTGTGGTGTGTATTAGTGAAGCCACAGATGTAATACACACCACACAGACTCCTTTGCCTACTGCCTCGGA	Pool_12
144455	E2F7.1593	TGCTGTTGACAGTGAGCGCTAGACAGAAAATAGAAGACAATAGTGAAGCCACAGATGTATTGTCTTCTATTTTCTGTCTATTGCCTACTGCCTCGGA	Pool_12
144455	E2F7.1423	TGCTGTTGACAGTGAGCGACAGATTCAAGTCTGTGCAAAATAGTGAAGCCACAGATGTATTTTGCACAGACTTGAATCTGGTGCCTACTGCCTCGGA	Pool_12
144455	E2F7.1583	TGCTGTTGACAGTGAGCGACAGCTGTCTATAGACAGAAAATAGTGAAGCCACAGATGTATTTTCTGTCTATAGACAGCTGCTGCCTACTGCCTCGGA	Pool_12
144455	E2F7.442	TGCTGTTGACAGTGAGCGCCCAGTTAAGTTTGTTGACAGATAGTGAAGCCACAGATGTATCTGTCAACAAACTTAACTGGATGCCTACTGCCTCGGA	Pool_12
144455	E2F7.288	TGCTGTTGACAGTGAGCGACAGACTAGATTTTGCAGTTGATAGTGAAGCCACAGATGTATCAACTGCAAAATCTAGTCTGGTGCCTACTGCCTCGGA	Pool_12
144455	E2F7.3900	TGCTGTTGACAGTGAGCGCCAGGATGGTAGAAAGTGATTATAGTGAAGCCACAGATGTATAATCACTTTCTACCATCCTGATGCCTACTGCCTCGGA	Pool_12
112399	EGLN3.1245	TGCTGTTGACAGTGAGCGACCAGATGAAGTTACTTGCTAATAGTGAAGCCACAGATGTATTAGCAAGTAACTTCATCTGGCTGCCTACTGCCTCGGA	Pool_12
112399	EGLN3.2036	TGCTGTTGACAGTGAGCGCAAGCAAGGTGATGTATTTTAATAGTGAAGCCACAGATGTATTAAAATACATCACCTTGCTTTTGCCTACTGCCTCGGA	Pool_12
112399	EGLN3.1892	TGCTGTTGACAGTGAGCGATAGGTCTACTGATATACAATATAGTGAAGCCACAGATGTATATTGTATATCAGTAGACCTAGTGCCTACTGCCTCGGA	Pool_12
112399	EGLN3.1402	TGCTGTTGACAGTGAGCGCAAGGAGGAGGTTTGAAAAGAATAGTGAAGCCACAGATGTATTCTTTTCAAACCTCCTCCTTTTGCCTACTGCCTCGGA	Pool_12
112399	EGLN3.1318	TGCTGTTGACAGTGAGCGCTCGGTAATACTATCAAGAGAATAGTGAAGCCACAGATGTATTCTCTTGATAGTATTACCGAATGCCTACTGCCTCGGA	Pool_12
112399	EGLN3.2516	TGCTGTTGACAGTGAGCGCCACCTTCTAAATTACTATGTATAGTGAAGCCACAGATGTATACATAGTAATTTAGAAGGTGATGCCTACTGCCTCGGA	Pool_12
2176	FANCC.2643	TGCTGTTGACAGTGAGCGACAGGATTAATTCAGTTAGTTATAGTGAAGCCACAGATGTATAACTAACTGAATTAATCCTGCTGCCTACTGCCTCGGA	Pool_12
2176	FANCC.2135	TGCTGTTGACAGTGAGCGATCAGTCAGACATGTTCACTAATAGTGAAGCCACAGATGTATTAGTGAACATGTCTGACTGAGTGCCTACTGCCTCGGA	Pool_12
2176	FANCC.3071	TGCTGTTGACAGTGAGCGCCAGGGACATTCTGGAATTGTATAGTGAAGCCACAGATGTATACAATTCCAGAATGTCCCTGATGCCTACTGCCTCGGA	Pool_12
2176	FANCC.568	TGCTGTTGACAGTGAGCGACACAGAATTCTGGACAATCAATAGTGAAGCCACAGATGTATTGATTGTCCAGAATTCTGTGGTGCCTACTGCCTCGGA	Pool_12
2176	FANCC.4379	TGCTGTTGACAGTGAGCGATAGACTCTCCCTGATAGTTTATAGTGAAGCCACAGATGTATAAACTATCAGGGAGAGTCTACTGCCTACTGCCTCGGA	Pool_12
2176	FANCC.1073	TGCTGTTGACAGTGAGCGAAAGGATCGAATGCTTTATAAATAGTGAAGCCACAGATGTATTTATAAAGCATTCGATCCTTCTGCCTACTGCCTCGGA	Pool_12
2237	FEN1.1749	TGCTGTTGACAGTGAGCGAAGGCAGTTTAATGGACACTAATAGTGAAGCCACAGATGTATTAGTGTCCATTAAACTGCCTGTGCCTACTGCCTCGGA	Pool_12
2237	FEN1.1572	TGCTGTTGACAGTGAGCGCTAAGAGCTACAGCTAGAGAAATAGTGAAGCCACAGATGTATTTCTCTAGCTGTAGCTCTTAATGCCTACTGCCTCGGA	Pool_12
2237	FEN1.779	TGCTGTTGACAGTGAGCGACAGCACAATGATGAGTGCAAATAGTGAAGCCACAGATGTATTTGCACTCATCATTGTGCTGCTGCCTACTGCCTCGGA	Pool_12
2237	FEN1.2084	TGCTGTTGACAGTGAGCGAAAACTCGAACTTGCTATGTAATAGTGAAGCCACAGATGTATTACATAGCAAGTTCGAGTTTCTGCCTACTGCCTCGGA	Pool_12
2237	FEN1.1837	TGCTGTTGACAGTGAGCGAGAGACAAAAGATGTACAGAAATAGTGAAGCCACAGATGTATTTCTGTACATCTTTTGTCTCCTGCCTACTGCCTCGGA	Pool_12
2237	FEN1.1767	TGCTGTTGACAGTGAGCGATAAGTCCATTGTTACATGAAATAGTGAAGCCACAGATGTATTTCATGTAACAATGGACTTAGTGCCTACTGCCTCGGA	Pool_12
2308	FOXO1.3397	TGCTGTTGACAGTGAGCGACAGGAAAGTGATGTATAGTTATAGTGAAGCCACAGATGTATAACTATACATCACTTTCCTGCTGCCTACTGCCTCGGA	Pool_12
2308	FOXO1.3704	TGCTGTTGACAGTGAGCGACAGGTGGAGGTTGGTTTTGTATAGTGAAGCCACAGATGTATACAAAACCAACCTCCACCTGGTGCCTACTGCCTCGGA	Pool_12
2308	FOXO1.4982	TGCTGTTGACAGTGAGCGCTAGAGCTATTCAGATATTTTATAGTGAAGCCACAGATGTATAAAATATCTGAATAGCTCTATTGCCTACTGCCTCGGA	Pool_12
2308	FOXO1.3174	TGCTGTTGACAGTGAGCGATAGAGTCTACTTTGTTACATATAGTGAAGCCACAGATGTATATGTAACAAAGTAGACTCTAGTGCCTACTGCCTCGGA	Pool_12
2308	FOXO1.2939	TGCTGTTGACAGTGAGCGATAGCCTGTTATCAATCTGCTATAGTGAAGCCACAGATGTATAGCAGATTGATAACAGGCTACTGCCTACTGCCTCGGA	Pool_12
2308	FOXO1.2313	TGCTGTTGACAGTGAGCGCCACAGTGTCAAGACAACGACATAGTGAAGCCACAGATGTATGTCGTTGTCTTGACACTGTGTTGCCTACTGCCTCGGA	Pool_12
27030	MLH3.2472	TGCTGTTGACAGTGAGCGATAGGATCTTTAGAGAAGTTTATAGTGAAGCCACAGATGTATAAACTTCTCTAAAGATCCTAGTGCCTACTGCCTCGGA	Pool_12
27030	MLH3.2720	TGCTGTTGACAGTGAGCGAAAGGATGAAGATTGTTTAGAATAGTGAAGCCACAGATGTATTCTAAACAATCTTCATCCTTGTGCCTACTGCCTCGGA	Pool_12
27030	MLH3.3680	TGCTGTTGACAGTGAGCGCCCAGAGGTTGCTGTTGATGTATAGTGAAGCCACAGATGTATACATCAACAGCAACCTCTGGATGCCTACTGCCTCGGA	Pool_12
27030	MLH3.3300	TGCTGTTGACAGTGAGCGCAAGCAAGAGCTTGTTCTGAAATAGTGAAGCCACAGATGTATTTCAGAACAAGCTCTTGCTTTTGCCTACTGCCTCGGA	Pool_12
27030	MLH3.5185	TGCTGTTGACAGTGAGCGCAACTCAGAGACTGATGTTCAATAGTGAAGCCACAGATGTATTGAACATCAGTCTCTGAGTTTTGCCTACTGCCTCGGA	Pool_12
27030	MLH3.646	TGCTGTTGACAGTGAGCGATGGGACTACTGTAACAGTGTATAGTGAAGCCACAGATGTATACACTGTTACAGTAGTCCCAGTGCCTACTGCCTCGGA	Pool_12
9643	MORF4L2.1348	TGCTGTTGACAGTGAGCGCAAGGTTCAACTTAATGTATATTAGTGAAGCCACAGATGTAATATACATTAAGTTGAACCTTTTGCCTACTGCCTCGGA	Pool_12
9643	MORF4L2.1119	TGCTGTTGACAGTGAGCGCTCCGTTCTGTTTTAAACAGAATAGTGAAGCCACAGATGTATTCTGTTTAAAACAGAACGGAATGCCTACTGCCTCGGA	Pool_12
9643	MORF4L2.251	TGCTGTTGACAGTGAGCGCCAGCTGGTCCACAGCAGAAAATAGTGAAGCCACAGATGTATTTTCTGCTGTGGACCAGCTGTTGCCTACTGCCTCGGA	Pool_12
9643	MORF4L2.1207	TGCTGTTGACAGTGAGCGCAAGAAGAAACATTCAGTAGAATAGTGAAGCCACAGATGTATTCTACTGAATGTTTCTTCTTTTGCCTACTGCCTCGGA	Pool_12
9643	MORF4L2.170	TGCTGTTGACAGTGAGCGACAGAAGAAGAGAACTTCAAAATAGTGAAGCCACAGATGTATTTTGAAGTTCTCTTCTTCTGCTGCCTACTGCCTCGGA	Pool_12
9643	MORF4L2.1120	TGCTGTTGACAGTGAGCGCCCGTTCTGTTTTAAACAGAAATAGTGAAGCCACAGATGTATTTCTGTTTAAAACAGAACGGATGCCTACTGCCTCGGA	Pool_12
4361	MRE11A.2297	TGCTGTTGACAGTGAGCGAAAGCTAAGAGTTTACAGTTTATAGTGAAGCCACAGATGTATAAACTGTAAACTCTTAGCTTGTGCCTACTGCCTCGGA	Pool_12
4361	MRE11A.4841	TGCTGTTGACAGTGAGCGCTACGAAGTTAGTGTAGTTGCATAGTGAAGCCACAGATGTATGCAACTACACTAACTTCGTAATGCCTACTGCCTCGGA	Pool_12
4361	MRE11A.1478	TGCTGTTGACAGTGAGCGCAGGGTAGAAGATCTTGTAAAATAGTGAAGCCACAGATGTATTTTACAAGATCTTCTACCCTTTGCCTACTGCCTCGGA	Pool_12
4361	MRE11A.3334	TGCTGTTGACAGTGAGCGCCAGCTTTACTTTAAAATTCAATAGTGAAGCCACAGATGTATTGAATTTTAAAGTAAAGCTGTTGCCTACTGCCTCGGA	Pool_12
4361	MRE11A.4497	TGCTGTTGACAGTGAGCGATAGGAAATTCTTGAAAATATATAGTGAAGCCACAGATGTATATATTTTCAAGAATTTCCTAGTGCCTACTGCCTCGGA	Pool_12
4361	MRE11A.712	TGCTGTTGACAGTGAGCGAAAGCACAAAGATTGCGCTATATAGTGAAGCCACAGATGTATATAGCGCAATCTTTGTGCTTCTGCCTACTGCCTCGGA	Pool_12
64949	MRPS26.938	TGCTGTTGACAGTGAGCGACAGGTCATCTGAGTATCATTATAGTGAAGCCACAGATGTATAATGATACTCAGATGACCTGGTGCCTACTGCCTCGGA	Pool_12
64949	MRPS26.733	TGCTGTTGACAGTGAGCGCAAAGCAGTTGGTGTTGCTTATTAGTGAAGCCACAGATGTAATAAGCAACACCAACTGCTTTATGCCTACTGCCTCGGA	Pool_12
64949	MRPS26.516	TGCTGTTGACAGTGAGCGACAGCTGCAGGAAGAGGTGAAATAGTGAAGCCACAGATGTATTTCACCTCTTCCTGCAGCTGCTGCCTACTGCCTCGGA	Pool_12
64949	MRPS26.998	TGCTGTTGACAGTGAGCGATGCCTGCTTCCTGTTTTTGTATAGTGAAGCCACAGATGTATACAAAAACAGGAAGCAGGCACTGCCTACTGCCTCGGA	Pool_12
64949	MRPS26.959	TGCTGTTGACAGTGAGCGCAGAGTAGTGATGGGAAGATTATAGTGAAGCCACAGATGTATAATCTTCCCATCACTACTCTTTGCCTACTGCCTCGGA	Pool_12
64949	MRPS26.882	TGCTGTTGACAGTGAGCGATAGAGTGGTTTCCATCTCACATAGTGAAGCCACAGATGTATGTGAGATGGAAACCACTCTAGTGCCTACTGCCTCGGA	Pool_12
79858	NEK11.1410	TGCTGTTGACAGTGAGCGCCAGCAGCTGAGTGTTGATGTATAGTGAAGCCACAGATGTATACATCAACACTCAGCTGCTGATGCCTACTGCCTCGGA	Pool_12
79858	NEK11.1608	TGCTGTTGACAGTGAGCGACACGAACTTGAATCAATTGTATAGTGAAGCCACAGATGTATACAATTGATTCAAGTTCGTGGTGCCTACTGCCTCGGA	Pool_12
79858	NEK11.208	TGCTGTTGACAGTGAGCGATGGAATGTTAAGTTTCTATAATAGTGAAGCCACAGATGTATTATAGAAACTTAACATTCCAGTGCCTACTGCCTCGGA	Pool_12
79858	NEK11.728	TGCTGTTGACAGTGAGCGCTCGAGACTTAAAGTCAAAGAATAGTGAAGCCACAGATGTATTCTTTGACTTTAAGTCTCGATTGCCTACTGCCTCGGA	Pool_12
79858	NEK11.1191	TGCTGTTGACAGTGAGCGCCAGAAGGAGGCTGCTCATATATAGTGAAGCCACAGATGTATATATGAGCAGCCTCCTTCTGATGCCTACTGCCTCGGA	Pool_12
79858	NEK11.717	TGCTGTTGACAGTGAGCGAAGGATACTTCATCGAGACTTATAGTGAAGCCACAGATGTATAAGTCTCGATGAAGTATCCTCTGCCTACTGCCTCGGA	Pool_12
197370	NSMCE1.490	TGCTGTTGACAGTGAGCGAAACCTGGTTGATCAACTTAAATAGTGAAGCCACAGATGTATTTAAGTTGATCAACCAGGTTCTGCCTACTGCCTCGGA	Pool_12
197370	NSMCE1.549	TGCTGTTGACAGTGAGCGCGCAGAAGTTTGTTCAAAACAATAGTGAAGCCACAGATGTATTGTTTTGAACAAACTTCTGCATGCCTACTGCCTCGGA	Pool_12
197370	NSMCE1.510	TGCTGTTGACAGTGAGCGCAGGCAAGAAGATGAGGAAGAATAGTGAAGCCACAGATGTATTCTTCCTCATCTTCTTGCCTTTGCCTACTGCCTCGGA	Pool_12
197370	NSMCE1.394	TGCTGTTGACAGTGAGCGCACGGATTTTGCAGAGAATGAATAGTGAAGCCACAGATGTATTCATTCTCTGCAAAATCCGTATGCCTACTGCCTCGGA	Pool_12
197370	NSMCE1.656	TGCTGTTGACAGTGAGCGAACGCGGTGAAGATCTGCAATATAGTGAAGCCACAGATGTATATTGCAGATCTTCACCGCGTCTGCCTACTGCCTCGGA	Pool_12
197370	NSMCE1.282	TGCTGTTGACAGTGAGCGCCAGTGTCTTGGAGTCCTTGTATAGTGAAGCCACAGATGTATACAAGGACTCCAAGACACTGTTGCCTACTGCCTCGGA	Pool_12
83666	PARP9.1731	TGCTGTTGACAGTGAGCGAAAGGACAGAGTTAGAGATTGATAGTGAAGCCACAGATGTATCAATCTCTAACTCTGTCCTTCTGCCTACTGCCTCGGA	Pool_12
83666	PARP9.1116	TGCTGTTGACAGTGAGCGACCAGTTGGTACTGGTCACAAATAGTGAAGCCACAGATGTATTTGTGACCAGTACCAACTGGGTGCCTACTGCCTCGGA	Pool_12
83666	PARP9.1948	TGCTGTTGACAGTGAGCGCGAGCTTCTAGATCAAAAGAAATAGTGAAGCCACAGATGTATTTCTTTTGATCTAGAAGCTCTTGCCTACTGCCTCGGA	Pool_12
83666	PARP9.1998	TGCTGTTGACAGTGAGCGCAAAGGTGGAGAAGATAGACAATAGTGAAGCCACAGATGTATTGTCTATCTTCTCCACCTTTATGCCTACTGCCTCGGA	Pool_12
83666	PARP9.1136	TGCTGTTGACAGTGAGCGCAAGGATTTAACTTGTTCTGTATAGTGAAGCCACAGATGTATACAGAACAAGTTAAATCCTTTTGCCTACTGCCTCGGA	Pool_12
83666	PARP9.193	TGCTGTTGACAGTGAGCGACACAATGACTTCAAAATTTTATAGTGAAGCCACAGATGTATAAAATTTTGAAGTCATTGTGGTGCCTACTGCCTCGGA	Pool_12
27315	PGAP2.1546	TGCTGTTGACAGTGAGCGCCAGATGCAGATCTCTACTGTATAGTGAAGCCACAGATGTATACAGTAGAGATCTGCATCTGATGCCTACTGCCTCGGA	Pool_12
27315	PGAP2.393	TGCTGTTGACAGTGAGCGCCGCGTTGCTAGTGCTCACTTATAGTGAAGCCACAGATGTATAAGTGAGCACTAGCAACGCGATGCCTACTGCCTCGGA	Pool_12
27315	PGAP2.1414	TGCTGTTGACAGTGAGCGAGAGGTGGTGTTCTATACCTAATAGTGAAGCCACAGATGTATTAGGTATAGAACACCACCTCCTGCCTACTGCCTCGGA	Pool_12
27315	PGAP2.1415	TGCTGTTGACAGTGAGCGAAGGTGGTGTTCTATACCTAAATAGTGAAGCCACAGATGTATTTAGGTATAGAACACCACCTCTGCCTACTGCCTCGGA	Pool_12
27315	PGAP2.1180	TGCTGTTGACAGTGAGCGCTAGGACTAATGTATTTCATGATAGTGAAGCCACAGATGTATCATGAAATACATTAGTCCTATTGCCTACTGCCTCGGA	Pool_12
27315	PGAP2.615	TGCTGTTGACAGTGAGCGCTCGGCACAACATGTATTGTGATAGTGAAGCCACAGATGTATCACAATACATGTTGTGCCGAATGCCTACTGCCTCGGA	Pool_12
23612	PHLDA3.686	TGCTGTTGACAGTGAGCGCAGGCCTGGTCAAGTTCAAGAATAGTGAAGCCACAGATGTATTCTTGAACTTGACCAGGCCTATGCCTACTGCCTCGGA	Pool_12
23612	PHLDA3.782	TGCTGTTGACAGTGAGCGACACCATCTTTCCTTCATGCTATAGTGAAGCCACAGATGTATAGCATGAAGGAAAGATGGTGCTGCCTACTGCCTCGGA	Pool_12
23612	PHLDA3.964	TGCTGTTGACAGTGAGCGAAGGGCTGAGGATGAAGATGCATAGTGAAGCCACAGATGTATGCATCTTCATCCTCAGCCCTGTGCCTACTGCCTCGGA	Pool_12
23612	PHLDA3.689	TGCTGTTGACAGTGAGCGACCTGGTCAAGTTCAAGAACCATAGTGAAGCCACAGATGTATGGTTCTTGAACTTGACCAGGCTGCCTACTGCCTCGGA	Pool_12
23612	PHLDA3.1210	TGCTGTTGACAGTGAGCGAAGCCTGGTACCAAAAGGAGTATAGTGAAGCCACAGATGTATACTCCTTTTGGTACCAGGCTGTGCCTACTGCCTCGGA	Pool_12
23612	PHLDA3.683	TGCTGTTGACAGTGAGCGACCTAGGCCTGGTCAAGTTCAATAGTGAAGCCACAGATGTATTGAACTTGACCAGGCCTAGGGTGCCTACTGCCTCGGA	Pool_12
11284	PNKP.744	TGCTGTTGACAGTGAGCGCCAAGCTGGTGATCTTCACCAATAGTGAAGCCACAGATGTATTGGTGAAGATCACCAGCTTGTTGCCTACTGCCTCGGA	Pool_12
11284	PNKP.1239	TGCTGTTGACAGTGAGCGACGGGAAGTCCACCTTTCTCAATAGTGAAGCCACAGATGTATTGAGAAAGGTGGACTTCCCGGTGCCTACTGCCTCGGA	Pool_12
11284	PNKP.1530	TGCTGTTGACAGTGAGCGACGTGTCAGACATGGTCATGTATAGTGAAGCCACAGATGTATACATGACCATGTCTGACACGGTGCCTACTGCCTCGGA	Pool_12
11284	PNKP.678	TGCTGTTGACAGTGAGCGACAGTGACTGGAGGATCTTGTATAGTGAAGCCACAGATGTATACAAGATCCTCCAGTCACTGGTGCCTACTGCCTCGGA	Pool_12
11284	PNKP.560	TGCTGTTGACAGTGAGCGCTGGAGAAGTTGCTAGTGTTCATAGTGAAGCCACAGATGTATGAACACTAGCAACTTCTCCAATGCCTACTGCCTCGGA	Pool_12
11284	PNKP.521	TGCTGTTGACAGTGAGCGCAGAAGCGTATGCGGAAGTCAATAGTGAAGCCACAGATGTATTGACTTCCGCATACGCTTCTTTGCCTACTGCCTCGGA	Pool_12
5426	POLE.4212	TGCTGTTGACAGTGAGCGATCGCTCCAACATGGTCTACAATAGTGAAGCCACAGATGTATTGTAGACCATGTTGGAGCGAGTGCCTACTGCCTCGGA	Pool_12
5426	POLE.972	TGCTGTTGACAGTGAGCGCCAGGGAGATTGTTTCAGAAGATAGTGAAGCCACAGATGTATCTTCTGAAACAATCTCCCTGTTGCCTACTGCCTCGGA	Pool_12
5426	POLE.1113	TGCTGTTGACAGTGAGCGACACCATCATGGTCACCTACAATAGTGAAGCCACAGATGTATTGTAGGTGACCATGATGGTGGTGCCTACTGCCTCGGA	Pool_12
5426	POLE.2189	TGCTGTTGACAGTGAGCGAAGGCGAAATACGAGAAGAGAATAGTGAAGCCACAGATGTATTCTCTTCTCGTATTTCGCCTGTGCCTACTGCCTCGGA	Pool_12
5426	POLE.6243	TGCTGTTGACAGTGAGCGCCACTCAGAAGATTCAGAAGAATAGTGAAGCCACAGATGTATTCTTCTGAATCTTCTGAGTGATGCCTACTGCCTCGGA	Pool_12
5426	POLE.2661	TGCTGTTGACAGTGAGCGCCCCAGAAAATTTTGTCTTCAATAGTGAAGCCACAGATGTATTGAAGACAAAATTTTCTGGGATGCCTACTGCCTCGGA	Pool_12
5441	POLR2L.378	TGCTGTTGACAGTGAGCGCAAGGTCTTTCAGAACCACTAATAGTGAAGCCACAGATGTATTAGTGGTTCTGAAAGACCTTTTGCCTACTGCCTCGGA	Pool_12
5441	POLR2L.860	TGCTGTTGACAGTGAGCGATGGGAGGTTGCCACTGCAAAATAGTGAAGCCACAGATGTATTTTGCAGTGGCAACCTCCCAGTGCCTACTGCCTCGGA	Pool_12
5441	POLR2L.716	TGCTGTTGACAGTGAGCGCCACTTGAGTCCAGAAATTCAATAGTGAAGCCACAGATGTATTGAATTTCTGGACTCAAGTGATGCCTACTGCCTCGGA	Pool_12
5441	POLR2L.371	TGCTGTTGACAGTGAGCGCTCCAGTAAAGGTCTTTCAGAATAGTGAAGCCACAGATGTATTCTGAAAGACCTTTACTGGATTGCCTACTGCCTCGGA	Pool_12
5441	POLR2L.377	TGCTGTTGACAGTGAGCGCAAAGGTCTTTCAGAACCACTATAGTGAAGCCACAGATGTATAGTGGTTCTGAAAGACCTTTATGCCTACTGCCTCGGA	Pool_12
5441	POLR2L.710	TGCTGTTGACAGTGAGCGAGAGGATCACTTGAGTCCAGAATAGTGAAGCCACAGATGTATTCTGGACTCAAGTGATCCTCCTGCCTACTGCCTCGGA	Pool_12
55170	PRMT6.1519	TGCTGTTGACAGTGAGCGAACGGATGAAAATGTCAGTTTTTAGTGAAGCCACAGATGTAAAAACTGACATTTTCATCCGTGTGCCTACTGCCTCGGA	Pool_12
55170	PRMT6.2301	TGCTGTTGACAGTGAGCGAAAGTGTGAATCTTGTTATCAATAGTGAAGCCACAGATGTATTGATAACAAGATTCACACTTCTGCCTACTGCCTCGGA	Pool_12
55170	PRMT6.2524	TGCTGTTGACAGTGAGCGAGAGCTTCTGTATGCTAAGAAATAGTGAAGCCACAGATGTATTTCTTAGCATACAGAAGCTCGTGCCTACTGCCTCGGA	Pool_12
55170	PRMT6.204	TGCTGTTGACAGTGAGCGCCCAGCTGTACTACGAGTGCTATAGTGAAGCCACAGATGTATAGCACTCGTAGTACAGCTGGTTGCCTACTGCCTCGGA	Pool_12
55170	PRMT6.1822	TGCTGTTGACAGTGAGCGCTAGGGTGCTAAAGTTGATGAATAGTGAAGCCACAGATGTATTCATCAACTTTAGCACCCTATTGCCTACTGCCTCGGA	Pool_12
55170	PRMT6.2125	TGCTGTTGACAGTGAGCGACAGCTAGAAAAGTATACTCATTAGTGAAGCCACAGATGTAATGAGTATACTTTTCTAGCTGGTGCCTACTGCCTCGGA	Pool_12
5686	PSMA5.1179	TGCTGTTGACAGTGAGCGACCAGTGGTTAATAGATGTTAATAGTGAAGCCACAGATGTATTAACATCTATTAACCACTGGGTGCCTACTGCCTCGGA	Pool_12
5686	PSMA5.2757	TGCTGTTGACAGTGAGCGCACGGTTTTTAGTAATAAGATATAGTGAAGCCACAGATGTATATCTTATTACTAAAAACCGTATGCCTACTGCCTCGGA	Pool_12
5686	PSMA5.3339	TGCTGTTGACAGTGAGCGCAAGGAACAAATTGTTCACCAATAGTGAAGCCACAGATGTATTGGTGAACAATTTGTTCCTTTTGCCTACTGCCTCGGA	Pool_12
5686	PSMA5.1417	TGCTGTTGACAGTGAGCGAAAGGACTAAGAATTAAATTAATAGTGAAGCCACAGATGTATTAATTTAATTCTTAGTCCTTCTGCCTACTGCCTCGGA	Pool_12
5686	PSMA5.1890	TGCTGTTGACAGTGAGCGCAGGAAGTTGTACTATATGTTATAGTGAAGCCACAGATGTATAACATATAGTACAACTTCCTATGCCTACTGCCTCGGA	Pool_12
5686	PSMA5.1408	TGCTGTTGACAGTGAGCGCTACGAAGTGAAGGACTAAGAATAGTGAAGCCACAGATGTATTCTTAGTCCTTCACTTCGTAATGCCTACTGCCTCGGA	Pool_12
5699	PSMB10.958	TGCTGTTGACAGTGAGCGCAACCCAGAAAATACAGTTAAATAGTGAAGCCACAGATGTATTTAACTGTATTTTCTGGGTTTTGCCTACTGCCTCGGA	Pool_12
5699	PSMB10.962	TGCTGTTGACAGTGAGCGACAGAAAATACAGTTAAACAAATAGTGAAGCCACAGATGTATTTGTTTAACTGTATTTTCTGGTGCCTACTGCCTCGGA	Pool_12
5699	PSMB10.961	TGCTGTTGACAGTGAGCGACCAGAAAATACAGTTAAACAATAGTGAAGCCACAGATGTATTGTTTAACTGTATTTTCTGGGTGCCTACTGCCTCGGA	Pool_12
5699	PSMB10.740	TGCTGTTGACAGTGAGCGAACGCATGTGTGATCACAAAGATAGTGAAGCCACAGATGTATCTTTGTGATCACACATGCGTCTGCCTACTGCCTCGGA	Pool_12
5699	PSMB10.857	TGCTGTTGACAGTGAGCGCCCCAGACAGTGAAGCCACTAATAGTGAAGCCACAGATGTATTAGTGGCTTCACTGTCTGGGTTGCCTACTGCCTCGGA	Pool_12
5699	PSMB10.737	TGCTGTTGACAGTGAGCGATGGACGCATGTGTGATCACAATAGTGAAGCCACAGATGTATTGTGATCACACATGCGTCCACTGCCTACTGCCTCGGA	Pool_12
10213	PSMD14.977	TGCTGTTGACAGTGAGCGCTAGGACATGAACCAAGACAAATAGTGAAGCCACAGATGTATTTGTCTTGGTTCATGTCCTAATGCCTACTGCCTCGGA	Pool_12
10213	PSMD14.1576	TGCTGTTGACAGTGAGCGCCAGGGTCTTTGCAGATTCTAATAGTGAAGCCACAGATGTATTAGAATCTGCAAAGACCCTGATGCCTACTGCCTCGGA	Pool_12
10213	PSMD14.1445	TGCTGTTGACAGTGAGCGATCTGTTGTTCCTAATGCTCAATAGTGAAGCCACAGATGTATTGAGCATTAGGAACAACAGAGTGCCTACTGCCTCGGA	Pool_12
10213	PSMD14.1036	TGCTGTTGACAGTGAGCGACAGGCATTAATTCATGGACTATAGTGAAGCCACAGATGTATAGTCCATGAATTAATGCCTGGTGCCTACTGCCTCGGA	Pool_12
10213	PSMD14.1237	TGCTGTTGACAGTGAGCGCAAGGCTGTAGAAGAAGAAGATTAGTGAAGCCACAGATGTAATCTTCTTCTTCTACAGCCTTATGCCTACTGCCTCGGA	Pool_12
10213	PSMD14.1238	TGCTGTTGACAGTGAGCGCAGGCTGTAGAAGAAGAAGATATAGTGAAGCCACAGATGTATATCTTCTTCTTCTACAGCCTTTGCCTACTGCCTCGGA	Pool_12
5708	PSMD2.792	TGCTGTTGACAGTGAGCGATGGGTGTGTTCCGAAAGTTTATAGTGAAGCCACAGATGTATAAACTTTCGGAACACACCCAGTGCCTACTGCCTCGGA	Pool_12
5708	PSMD2.890	TGCTGTTGACAGTGAGCGAAAGGATGTGGTAGTACAGAAATAGTGAAGCCACAGATGTATTTCTGTACTACCACATCCTTGTGCCTACTGCCTCGGA	Pool_12
5708	PSMD2.2885	TGCTGTTGACAGTGAGCGATGAGATAAGGTTGTTCAATAATAGTGAAGCCACAGATGTATTATTGAACAACCTTATCTCACTGCCTACTGCCTCGGA	Pool_12
5708	PSMD2.2891	TGCTGTTGACAGTGAGCGCAAGGTTGTTCAATAAAGACTTTAGTGAAGCCACAGATGTAAAGTCTTTATTGAACAACCTTATGCCTACTGCCTCGGA	Pool_12
5708	PSMD2.889	TGCTGTTGACAGTGAGCGACAAGGATGTGGTAGTACAGAATAGTGAAGCCACAGATGTATTCTGTACTACCACATCCTTGCTGCCTACTGCCTCGGA	Pool_12
5708	PSMD2.1924	TGCTGTTGACAGTGAGCGCCAAGAAGGAAAAGAAAGACAATAGTGAAGCCACAGATGTATTGTCTTTCTTTTCCTTCTTGTTGCCTACTGCCTCGGA	Pool_12
5713	PSMD7.370	TGCTGTTGACAGTGAGCGCTGGAATGTTTAAGAAAGTCAATAGTGAAGCCACAGATGTATTGACTTTCTTAAACATTCCATTGCCTACTGCCTCGGA	Pool_12
5713	PSMD7.1627	TGCTGTTGACAGTGAGCGCTACCTTCAAAGATACAATTAATAGTGAAGCCACAGATGTATTAATTGTATCTTTGAAGGTAATGCCTACTGCCTCGGA	Pool_12
5713	PSMD7.1004	TGCTGTTGACAGTGAGCGACAGGAGAAAGAAGAGAGCAAATAGTGAAGCCACAGATGTATTTGCTCTCTTCTTTCTCCTGCTGCCTACTGCCTCGGA	Pool_12
5713	PSMD7.1628	TGCTGTTGACAGTGAGCGCACCTTCAAAGATACAATTAAATAGTGAAGCCACAGATGTATTTAATTGTATCTTTGAAGGTATGCCTACTGCCTCGGA	Pool_12
5713	PSMD7.230	TGCTGTTGACAGTGAGCGAAAGCGTGTTGTTGGTGTGCTTTAGTGAAGCCACAGATGTAAAGCACACCAACAACACGCTTCTGCCTACTGCCTCGGA	Pool_12
5713	PSMD7.653	TGCTGTTGACAGTGAGCGCCACTTGTTACGAGATATCAAATAGTGAAGCCACAGATGTATTTGATATCTCGTAACAAGTGTTGCCTACTGCCTCGGA	Pool_12
5714	PSMD8.713	TGCTGTTGACAGTGAGCGCACAGACCAATGTCTACATCAATAGTGAAGCCACAGATGTATTGATGTAGACATTGGTCTGTATGCCTACTGCCTCGGA	Pool_12
5714	PSMD8.329	TGCTGTTGACAGTGAGCGACGGCATGTACGAGCAACTCAATAGTGAAGCCACAGATGTATTGAGTTGCTCGTACATGCCGGTGCCTACTGCCTCGGA	Pool_12
5714	PSMD8.44	TGCTGTTGACAGTGAGCGATCCAACTGACATGTTCATTAATAGTGAAGCCACAGATGTATTAATGAACATGTCAGTTGGAGTGCCTACTGCCTCGGA	Pool_12
5714	PSMD8.1135	TGCTGTTGACAGTGAGCGAACGAGTTATTTAAAACAGTTATAGTGAAGCCACAGATGTATAACTGTTTTAAATAACTCGTGTGCCTACTGCCTCGGA	Pool_12
5714	PSMD8.1227	TGCTGTTGACAGTGAGCGCCGGCAGAGAGACAAGTTCTTATAGTGAAGCCACAGATGTATAAGAACTTGTCTCTCTGCCGTTGCCTACTGCCTCGGA	Pool_12
5714	PSMD8.914	TGCTGTTGACAGTGAGCGACACCCGGATCCTCTTCTTCAATAGTGAAGCCACAGATGTATTGAAGAAGAGGATCCGGGTGGTGCCTACTGCCTCGGA	Pool_12
5810	RAD1.774	TGCTGTTGACAGTGAGCGACAGCACCAATGTTATTAATAATAGTGAAGCCACAGATGTATTATTAATAACATTGGTGCTGCTGCCTACTGCCTCGGA	Pool_12
5810	RAD1.1876	TGCTGTTGACAGTGAGCGATAGAGACTAGATCTTAAAGTATAGTGAAGCCACAGATGTATACTTTAAGATCTAGTCTCTAGTGCCTACTGCCTCGGA	Pool_12
5810	RAD1.556	TGCTGTTGACAGTGAGCGCCAGGAAGAGTCTGTTACTTTTTAGTGAAGCCACAGATGTAAAAAGTAACAGACTCTTCCTGATGCCTACTGCCTCGGA	Pool_12
5810	RAD1.654	TGCTGTTGACAGTGAGCGCTCGAATGTGTTACCAAGGTTATAGTGAAGCCACAGATGTATAACCTTGGTAACACATTCGAATGCCTACTGCCTCGGA	Pool_12
5810	RAD1.541	TGCTGTTGACAGTGAGCGCCAGGAGTTTAAAGTTCAGGAATAGTGAAGCCACAGATGTATTCCTGAACTTTAAACTCCTGATGCCTACTGCCTCGGA	Pool_12
5810	RAD1.495	TGCTGTTGACAGTGAGCGCTGCAAAGTGTGTGCAAGCAAATAGTGAAGCCACAGATGTATTTGCTTGCACACACTTTGCATTGCCTACTGCCTCGGA	Pool_12
5884	RAD17.537	TGCTGTTGACAGTGAGCGCCAGGAAGAGTGTTCTATCTCATAGTGAAGCCACAGATGTATGAGATAGAACACTCTTCCTGATGCCTACTGCCTCGGA	Pool_12
5884	RAD17.162	TGCTGTTGACAGTGAGCGCAAGGAGCATGGTATTCAAGTATAGTGAAGCCACAGATGTATACTTGAATACCATGCTCCTTTTGCCTACTGCCTCGGA	Pool_12
5884	RAD17.538	TGCTGTTGACAGTGAGCGAAGGAAGAGTGTTCTATCTCAATAGTGAAGCCACAGATGTATTGAGATAGAACACTCTTCCTGTGCCTACTGCCTCGGA	Pool_12
5884	RAD17.541	TGCTGTTGACAGTGAGCGAAAGAGTGTTCTATCTCAAATATAGTGAAGCCACAGATGTATATTTGAGATAGAACACTCTTCTGCCTACTGCCTCGGA	Pool_12
5884	RAD17.1289	TGCTGTTGACAGTGAGCGATCAGTGGTTTCTAATAAATAATAGTGAAGCCACAGATGTATTATTTATTAGAAACCACTGAGTGCCTACTGCCTCGGA	Pool_12
5884	RAD17.2109	TGCTGTTGACAGTGAGCGCTAGGATGCAATTACGAGTGTATAGTGAAGCCACAGATGTATACACTCGTAATTGCATCCTAATGCCTACTGCCTCGGA	Pool_12
25788	RAD54B.1267	TGCTGTTGACAGTGAGCGCCAGGACCACAAAGTTGAAGAATAGTGAAGCCACAGATGTATTCTTCAACTTTGTGGTCCTGATGCCTACTGCCTCGGA	Pool_12
25788	RAD54B.1544	TGCTGTTGACAGTGAGCGCTAGGCTCTTTGTCATCTTATATAGTGAAGCCACAGATGTATATAAGATGACAAAGAGCCTAATGCCTACTGCCTCGGA	Pool_12
25788	RAD54B.2062	TGCTGTTGACAGTGAGCGACACGAACTTCGACCTACTGAATAGTGAAGCCACAGATGTATTCAGTAGGTCGAAGTTCGTGGTGCCTACTGCCTCGGA	Pool_12
25788	RAD54B.2926	TGCTGTTGACAGTGAGCGCTACAGTATATGTTGCAAAATATAGTGAAGCCACAGATGTATATTTTGCAACATATACTGTAATGCCTACTGCCTCGGA	Pool_12
25788	RAD54B.548	TGCTGTTGACAGTGAGCGCAAGGAAAGTCATTTATATTAATAGTGAAGCCACAGATGTATTAATATAAATGACTTTCCTTTTGCCTACTGCCTCGGA	Pool_12
25788	RAD54B.1088	TGCTGTTGACAGTGAGCGCTAGGGAAGACATTGCAATGTATAGTGAAGCCACAGATGTATACATTGCAATGTCTTCCCTAATGCCTACTGCCTCGGA	Pool_12
5929	RBBP5.4233	TGCTGTTGACAGTGAGCGCTCGGATGTTTATTAAAGAAAATAGTGAAGCCACAGATGTATTTTCTTTAATAAACATCCGATTGCCTACTGCCTCGGA	Pool_12
5929	RBBP5.3255	TGCTGTTGACAGTGAGCGCTAGGATAGAAATCAAAGTAGATAGTGAAGCCACAGATGTATCTACTTTGATTTCTATCCTAATGCCTACTGCCTCGGA	Pool_12
5929	RBBP5.3160	TGCTGTTGACAGTGAGCGCCAGAATGAGACTCTATCTCAATAGTGAAGCCACAGATGTATTGAGATAGAGTCTCATTCTGTTGCCTACTGCCTCGGA	Pool_12
5929	RBBP5.2491	TGCTGTTGACAGTGAGCGAAACCACATAGTTCAAATCAAATAGTGAAGCCACAGATGTATTTGATTTGAACTATGTGGTTGTGCCTACTGCCTCGGA	Pool_12
5929	RBBP5.2405	TGCTGTTGACAGTGAGCGACAGGTGTCTCTCAACAAGCTATAGTGAAGCCACAGATGTATAGCTTGTTGAGAGACACCTGGTGCCTACTGCCTCGGA	Pool_12
5929	RBBP5.4120	TGCTGTTGACAGTGAGCGCCAGAGCAAGACTCCATCTCAATAGTGAAGCCACAGATGTATTGAGATGGAGTCTTGCTCTGTTGCCTACTGCCTCGGA	Pool_12
201299	RDM1.197	TGCTGTTGACAGTGAGCGAACCAGACATAAGGCAGTTCAATAGTGAAGCCACAGATGTATTGAACTGCCTTATGTCTGGTGTGCCTACTGCCTCGGA	Pool_12
201299	RDM1.152	TGCTGTTGACAGTGAGCGACGGAAGCAGCTTTTTCAGAAATAGTGAAGCCACAGATGTATTTCTGAAAAAGCTGCTTCCGGTGCCTACTGCCTCGGA	Pool_12
201299	RDM1.151	TGCTGTTGACAGTGAGCGCCCGGAAGCAGCTTTTTCAGAATAGTGAAGCCACAGATGTATTCTGAAAAAGCTGCTTCCGGTTGCCTACTGCCTCGGA	Pool_12
201299	RDM1.85	TGCTGTTGACAGTGAGCGATGGTTTCTATGCCGTCATTAATAGTGAAGCCACAGATGTATTAATGACGGCATAGAAACCAGTGCCTACTGCCTCGGA	Pool_12
201299	RDM1.199	TGCTGTTGACAGTGAGCGACAGACATAAGGCAGTTCAACATAGTGAAGCCACAGATGTATGTTGAACTGCCTTATGTCTGGTGCCTACTGCCTCGGA	Pool_12
201299	RDM1.258	TGCTGTTGACAGTGAGCGATGGCGAATTACTACTTTGGTTTAGTGAAGCCACAGATGTAAACCAAAGTAGTAATTCGCCAGTGCCTACTGCCTCGGA	Pool_12
9400	RECQL5.138	TGCTGTTGACAGTGAGCGACCGGTTCTGTGTTCTTGGCTATAGTGAAGCCACAGATGTATAGCCAAGAACACAGAACCGGCTGCCTACTGCCTCGGA	Pool_12
9400	RECQL5.1307	TGCTGTTGACAGTGAGCGACAGGAAAAGAGAGGAAACAAATAGTGAAGCCACAGATGTATTTGTTTCCTCTCTTTTCCTGGTGCCTACTGCCTCGGA	Pool_12
9400	RECQL5.830	TGCTGTTGACAGTGAGCGAAACCTCTTCTATGATGTGCAATAGTGAAGCCACAGATGTATTGCACATCATAGAAGAGGTTGTGCCTACTGCCTCGGA	Pool_12
9400	RECQL5.268	TGCTGTTGACAGTGAGCGATGCGACCATGGCTGTAGTAAATAGTGAAGCCACAGATGTATTTACTACAGCCATGGTCGCACTGCCTACTGCCTCGGA	Pool_12
9400	RECQL5.18	TGCTGTTGACAGTGAGCGATGGGTTCTGCCTAAAGCTGAATAGTGAAGCCACAGATGTATTCAGCTTTAGGCAGAACCCACTGCCTACTGCCTCGGA	Pool_12
9400	RECQL5.139	TGCTGTTGACAGTGAGCGACGGTTCTGTGTTCTTGGCTAATAGTGAAGCCACAGATGTATTAGCCAAGAACACAGAACCGGTGCCTACTGCCTCGGA	Pool_12
51455	REV1.3317	TGCTGTTGACAGTGAGCGACAGCGTATGATCAAAGACAAATAGTGAAGCCACAGATGTATTTGTCTTTGATCATACGCTGCTGCCTACTGCCTCGGA	Pool_12
51455	REV1.2785	TGCTGTTGACAGTGAGCGACAAGTTCAGAAAGCTAAGAAATAGTGAAGCCACAGATGTATTTCTTAGCTTTCTGAACTTGGTGCCTACTGCCTCGGA	Pool_12
51455	REV1.3025	TGCTGTTGACAGTGAGCGACAGCTGGATCAGTCTGTTTTATAGTGAAGCCACAGATGTATAAAACAGACTGATCCAGCTGGTGCCTACTGCCTCGGA	Pool_12
51455	REV1.1241	TGCTGTTGACAGTGAGCGCAACCTTCAGACTGCAATTTTATAGTGAAGCCACAGATGTATAAAATTGCAGTCTGAAGGTTTTGCCTACTGCCTCGGA	Pool_12
51455	REV1.4313	TGCTGTTGACAGTGAGCGAAAGCAACTACTGTTTATTATATAGTGAAGCCACAGATGTATATAATAAACAGTAGTTGCTTCTGCCTACTGCCTCGGA	Pool_12
51455	REV1.3413	TGCTGTTGACAGTGAGCGACAGCAGTGAAAGAAAAGAAAATAGTGAAGCCACAGATGTATTTTCTTTTCTTTCACTGCTGCTGCCTACTGCCTCGGA	Pool_12
55183	RIF1.692	TGCTGTTGACAGTGAGCGACAGCTTATGACTACTAAATTATAGTGAAGCCACAGATGTATAATTTAGTAGTCATAAGCTGCTGCCTACTGCCTCGGA	Pool_12
55183	RIF1.8793	TGCTGTTGACAGTGAGCGCCAGCAAGTCATAGAAAGTTTATAGTGAAGCCACAGATGTATAAACTTTCTATGACTTGCTGTTGCCTACTGCCTCGGA	Pool_12
55183	RIF1.7806	TGCTGTTGACAGTGAGCGCTAGGAAGTTTGTTACTGGTTATAGTGAAGCCACAGATGTATAACCAGTAACAAACTTCCTAATGCCTACTGCCTCGGA	Pool_12
55183	RIF1.3604	TGCTGTTGACAGTGAGCGCCAGCAGTAGTTCAGTTTCTAATAGTGAAGCCACAGATGTATTAGAAACTGAACTACTGCTGATGCCTACTGCCTCGGA	Pool_12
55183	RIF1.7989	TGCTGTTGACAGTGAGCGACAGCAGTTGACTGAAAATTTATAGTGAAGCCACAGATGTATAAATTTTCAGTCAACTGCTGCTGCCTACTGCCTCGGA	Pool_12
55183	RIF1.8911	TGCTGTTGACAGTGAGCGCTGGGTCTAAGATATTCATATATAGTGAAGCCACAGATGTATATATGAATATCTTAGACCCAATGCCTACTGCCTCGGA	Pool_12
6118	RPA2.1687	TGCTGTTGACAGTGAGCGCTACAGTCATATGTTTAATAAATAGTGAAGCCACAGATGTATTTATTAAACATATGACTGTATTGCCTACTGCCTCGGA	Pool_12
6118	RPA2.1128	TGCTGTTGACAGTGAGCGCCAGCTGGACCTAGTTTCACAATAGTGAAGCCACAGATGTATTGTGAAACTAGGTCCAGCTGTTGCCTACTGCCTCGGA	Pool_12
6118	RPA2.545	TGCTGTTGACAGTGAGCGCACCAACATTGTTTACAAAATATAGTGAAGCCACAGATGTATATTTTGTAAACAATGTTGGTTTGCCTACTGCCTCGGA	Pool_12
6118	RPA2.913	TGCTGTTGACAGTGAGCGCCCAGGTGTTGAATTTGATTAATAGTGAAGCCACAGATGTATTAATCAAATTCAACACCTGGTTGCCTACTGCCTCGGA	Pool_12
6118	RPA2.1688	TGCTGTTGACAGTGAGCGCACAGTCATATGTTTAATAAAATAGTGAAGCCACAGATGTATTTTATTAAACATATGACTGTATGCCTACTGCCTCGGA	Pool_12
6118	RPA2.1413	TGCTGTTGACAGTGAGCGCCAGGAGTTTCTCTTCTTAAAATAGTGAAGCCACAGATGTATTTTAAGAAGAGAAACTCCTGATGCCTACTGCCTCGGA	Pool_12
10856	RUVBL2.509	TGCTGTTGACAGTGAGCGACACAGAGATGGAGACCATCTATAGTGAAGCCACAGATGTATAGATGGTCTCCATCTCTGTGGTGCCTACTGCCTCGGA	Pool_12
10856	RUVBL2.1331	TGCTGTTGACAGTGAGCGACACGCAGTACATGAAGGAGTATAGTGAAGCCACAGATGTATACTCCTTCATGTACTGCGTGGTGCCTACTGCCTCGGA	Pool_12
10856	RUVBL2.1100	TGCTGTTGACAGTGAGCGCCAGCGAGAAAGACACGAAGCATAGTGAAGCCACAGATGTATGCTTCGTGTCTTTCTCGCTGTTGCCTACTGCCTCGGA	Pool_12
10856	RUVBL2.45	TGCTGTTGACAGTGAGCGACCGGAGATCCGTGATGTAACATAGTGAAGCCACAGATGTATGTTACATCACGGATCTCCGGGTGCCTACTGCCTCGGA	Pool_12
10856	RUVBL2.932	TGCTGTTGACAGTGAGCGCCGAGAGCTTCTCCTTCCTCAATAGTGAAGCCACAGATGTATTGAGGAAGGAGAAGCTCTCGATGCCTACTGCCTCGGA	Pool_12
10856	RUVBL2.1442	TGCTGTTGACAGTGAGCGAACCAGAGTTCTGACACTGTGATAGTGAAGCCACAGATGTATCACAGTGTCAGAACTCTGGTGTGCCTACTGCCTCGGA	Pool_12
387893	SETD8.2534	TGCTGTTGACAGTGAGCGCCACGACGGTGCTACCTAAGAATAGTGAAGCCACAGATGTATTCTTAGGTAGCACCGTCGTGATGCCTACTGCCTCGGA	Pool_12
387893	SETD8.254	TGCTGTTGACAGTGAGCGCCAGGAAGAGAACTCAGTTACATAGTGAAGCCACAGATGTATGTAACTGAGTTCTCTTCCTGATGCCTACTGCCTCGGA	Pool_12
387893	SETD8.374	TGCTGTTGACAGTGAGCGATCCGAGGAACAGAAGATCAAATAGTGAAGCCACAGATGTATTTGATCTTCTGTTCCTCGGACTGCCTACTGCCTCGGA	Pool_12
387893	SETD8.1826	TGCTGTTGACAGTGAGCGATGGGTTAATTCTTTATAGAAATAGTGAAGCCACAGATGTATTTCTATAAAGAATTAACCCAGTGCCTACTGCCTCGGA	Pool_12
387893	SETD8.2535	TGCTGTTGACAGTGAGCGAACGACGGTGCTACCTAAGAAATAGTGAAGCCACAGATGTATTTCTTAGGTAGCACCGTCGTGTGCCTACTGCCTCGGA	Pool_12
387893	SETD8.925	TGCTGTTGACAGTGAGCGAAAGACTGATCAATCACAGCAATAGTGAAGCCACAGATGTATTGCTGTGATTGATCAGTCTTCTGCCTACTGCCTCGGA	Pool_12
6446	SGK1.1815	TGCTGTTGACAGTGAGCGCACGGTTAATAACTAAAATTTATAGTGAAGCCACAGATGTATAAATTTTAGTTATTAACCGTATGCCTACTGCCTCGGA	Pool_12
6446	SGK1.832	TGCTGTTGACAGTGAGCGCCACAGCTGAAATGTACGACAATAGTGAAGCCACAGATGTATTGTCGTACATTTCAGCTGTGTTGCCTACTGCCTCGGA	Pool_12
6446	SGK1.1622	TGCTGTTGACAGTGAGCGCTCGCAGTGTTTCAGTTCTTTATAGTGAAGCCACAGATGTATAAAGAACTGAAACACTGCGATTGCCTACTGCCTCGGA	Pool_12
6446	SGK1.2115	TGCTGTTGACAGTGAGCGACACCATTTTAATGTACTGTAATAGTGAAGCCACAGATGTATTACAGTACATTAAAATGGTGGTGCCTACTGCCTCGGA	Pool_12
6446	SGK1.367	TGCTGTTGACAGTGAGCGCGCGGAATGTTCTGTTGAAGAATAGTGAAGCCACAGATGTATTCTTCAACAGAACATTCCGCTTGCCTACTGCCTCGGA	Pool_12
6446	SGK1.280	TGCTGTTGACAGTGAGCGCCAAGGCAGAAGAAGTGTTCTATAGTGAAGCCACAGATGTATAGAACACTTCTTCTGCCTTGTTGCCTACTGCCTCGGA	Pool_12
245711	SPDYA.126	TGCTGTTGACAGTGAGCGCAGCGTCCTATTTGTAAAGATATAGTGAAGCCACAGATGTATATCTTTACAAATAGGACGCTTTGCCTACTGCCTCGGA	Pool_12
245711	SPDYA.492	TGCTGTTGACAGTGAGCGCTCCCTAATTTCTTAAAGTTAATAGTGAAGCCACAGATGTATTAACTTTAAGAAATTAGGGAATGCCTACTGCCTCGGA	Pool_12
245711	SPDYA.416	TGCTGTTGACAGTGAGCGCACAGTTGAAGAAGATGAAGAATAGTGAAGCCACAGATGTATTCTTCATCTTCTTCAACTGTATGCCTACTGCCTCGGA	Pool_12
245711	SPDYA.52	TGCTGTTGACAGTGAGCGAACCACCTACTGTCACTGTTTATAGTGAAGCCACAGATGTATAAACAGTGACAGTAGGTGGTGTGCCTACTGCCTCGGA	Pool_12
245711	SPDYA.634	TGCTGTTGACAGTGAGCGATGGAGCTGTCAGAAACTACAATAGTGAAGCCACAGATGTATTGTAGTTTCTGACAGCTCCACTGCCTACTGCCTCGGA	Pool_12
245711	SPDYA.58	TGCTGTTGACAGTGAGCGATACTGTCACTGTTTATGTAAATAGTGAAGCCACAGATGTATTTACATAAACAGTGACAGTAGTGCCTACTGCCTCGGA	Pool_12
55775	TDP1.1736	TGCTGTTGACAGTGAGCGCCAGTTTCAAAGTGAAACAGAATAGTGAAGCCACAGATGTATTCTGTTTCACTTTGAAACTGTTGCCTACTGCCTCGGA	Pool_12
55775	TDP1.1815	TGCTGTTGACAGTGAGCGCCCAGAACTGTATGGAAGTAAATAGTGAAGCCACAGATGTATTTACTTCCATACAGTTCTGGATGCCTACTGCCTCGGA	Pool_12
55775	TDP1.2049	TGCTGTTGACAGTGAGCGCTGGATGTTGGTTATACTTTTATAGTGAAGCCACAGATGTATAAAAGTATAACCAACATCCATTGCCTACTGCCTCGGA	Pool_12
55775	TDP1.2318	TGCTGTTGACAGTGAGCGCCACCTTATATACAATAACCTATAGTGAAGCCACAGATGTATAGGTTATTGTATATAAGGTGTTGCCTACTGCCTCGGA	Pool_12
55775	TDP1.1424	TGCTGTTGACAGTGAGCGCGCGGACCAGTTTAGAAGGATATAGTGAAGCCACAGATGTATATCCTTCTAAACTGGTCCGCATGCCTACTGCCTCGGA	Pool_12
55775	TDP1.2447	TGCTGTTGACAGTGAGCGAGAGCATCATGTCAGCACTCAATAGTGAAGCCACAGATGTATTGAGTGCTGACATGATGCTCCTGCCTACTGCCTCGGA	Pool_12
79073	TMEM109.1807	TGCTGTTGACAGTGAGCGATGGCTGCTTTGTGTCAAGAAATAGTGAAGCCACAGATGTATTTCTTGACACAAAGCAGCCACTGCCTACTGCCTCGGA	Pool_12
79073	TMEM109.71	TGCTGTTGACAGTGAGCGCCAGCCCAGATATAGTCACTTATAGTGAAGCCACAGATGTATAAGTGACTATATCTGGGCTGTTGCCTACTGCCTCGGA	Pool_12
79073	TMEM109.2271	TGCTGTTGACAGTGAGCGCCAGGTTTGATGTGGAATCACATAGTGAAGCCACAGATGTATGTGATTCCACATCAAACCTGATGCCTACTGCCTCGGA	Pool_12
79073	TMEM109.1127	TGCTGTTGACAGTGAGCGCCACCGCCAGTGTCATACCAAATAGTGAAGCCACAGATGTATTTGGTATGACACTGGCGGTGTTGCCTACTGCCTCGGA	Pool_12
79073	TMEM109.1428	TGCTGTTGACAGTGAGCGACCGTTGGTCTCTCATGACTTATAGTGAAGCCACAGATGTATAAGTCATGAGAGACCAACGGCTGCCTACTGCCTCGGA	Pool_12
79073	TMEM109.2316	TGCTGTTGACAGTGAGCGCCAGTGCTTGGTTGGTTTTAAATAGTGAAGCCACAGATGTATTTAAAACCAACCAAGCACTGATGCCTACTGCCTCGGA	Pool_12
11277	TREX1.1465	TGCTGTTGACAGTGAGCGAAAGGAAAATCTGACGAATAAATAGTGAAGCCACAGATGTATTTATTCGTCAGATTTTCCTTCTGCCTACTGCCTCGGA	Pool_12
11277	TREX1.1461	TGCTGTTGACAGTGAGCGACAAGAAGGAAAATCTGACGAATAGTGAAGCCACAGATGTATTCGTCAGATTTTCCTTCTTGGTGCCTACTGCCTCGGA	Pool_12
11277	TREX1.1241	TGCTGTTGACAGTGAGCGACAAGACCATCTGCTGTCACAATAGTGAAGCCACAGATGTATTGTGACAGCAGATGGTCTTGGTGCCTACTGCCTCGGA	Pool_12
11277	TREX1.1464	TGCTGTTGACAGTGAGCGCGAAGGAAAATCTGACGAATAATAGTGAAGCCACAGATGTATTATTCGTCAGATTTTCCTTCTTGCCTACTGCCTCGGA	Pool_12
11277	TREX1.801	TGCTGTTGACAGTGAGCGAGCGTCAATGTTTTGATGACAATAGTGAAGCCACAGATGTATTGTCATCAAAACATTGACGCCTGCCTACTGCCTCGGA	Pool_12
11277	TREX1.1274	TGCTGTTGACAGTGAGCGATGGCCACAACCAGGAACACTATAGTGAAGCCACAGATGTATAGTGTTCCTGGTTGTGGCCAGTGCCTACTGCCTCGGA	Pool_12
9320	TRIP12.4215	TGCTGTTGACAGTGAGCGCCAGGCTGAAGATGAAAGAGAATAGTGAAGCCACAGATGTATTCTCTTTCATCTTCAGCCTGTTGCCTACTGCCTCGGA	Pool_12
9320	TRIP12.2450	TGCTGTTGACAGTGAGCGACCGGATCATTGAGCAAATCAATAGTGAAGCCACAGATGTATTGATTTGCTCAATGATCCGGCTGCCTACTGCCTCGGA	Pool_12
9320	TRIP12.3177	TGCTGTTGACAGTGAGCGAAAAGTAGACAATCAAGCTAAATAGTGAAGCCACAGATGTATTTAGCTTGATTGTCTACTTTGTGCCTACTGCCTCGGA	Pool_12
9320	TRIP12.1006	TGCTGTTGACAGTGAGCGCTAGCAAGTTTAAGAAAATCTATAGTGAAGCCACAGATGTATAGATTTTCTTAAACTTGCTAATGCCTACTGCCTCGGA	Pool_12
9320	TRIP12.2881	TGCTGTTGACAGTGAGCGAAAGGTGTAATGCATCAAGTAATAGTGAAGCCACAGATGTATTACTTGATGCATTACACCTTCTGCCTACTGCCTCGGA	Pool_12
9320	TRIP12.1431	TGCTGTTGACAGTGAGCGACAGCTACTACAAGGATTGCAATAGTGAAGCCACAGATGTATTGCAATCCTTGTAGTAGCTGCTGCCTACTGCCTCGGA	Pool_12
10600	USP16.1386	TGCTGTTGACAGTGAGCGCCAGAGTGGTAAGAAAAGTGTATAGTGAAGCCACAGATGTATACACTTTTCTTACCACTCTGATGCCTACTGCCTCGGA	Pool_12
10600	USP16.2613	TGCTGTTGACAGTGAGCGACAAGCTGTGCCTACAACTAAATAGTGAAGCCACAGATGTATTTAGTTGTAGGCACAGCTTGCTGCCTACTGCCTCGGA	Pool_12
10600	USP16.363	TGCTGTTGACAGTGAGCGCAAGACTGACAATAAAGTGAAATAGTGAAGCCACAGATGTATTTCACTTTATTGTCAGTCTTATGCCTACTGCCTCGGA	Pool_12
10600	USP16.1591	TGCTGTTGACAGTGAGCGAAAGGAAAAGTTCTTCATTTAATAGTGAAGCCACAGATGTATTAAATGAAGAACTTTTCCTTGTGCCTACTGCCTCGGA	Pool_12
10600	USP16.1428	TGCTGTTGACAGTGAGCGAACAGTGGAGGATGAAGATCAATAGTGAAGCCACAGATGTATTGATCTTCATCCTCCACTGTCTGCCTACTGCCTCGGA	Pool_12
10600	USP16.1110	TGCTGTTGACAGTGAGCGACAGGAGCTGCTTCGCTACTTATAGTGAAGCCACAGATGTATAAGTAGCGAAGCAGCTCCTGGTGCCTACTGCCTCGGA	Pool_12
10451	VAV3.1592	TGCTGTTGACAGTGAGCGCTAGGATTATTTTGGAAATATATAGTGAAGCCACAGATGTATATATTTCCAAAATAATCCTATTGCCTACTGCCTCGGA	Pool_12
10451	VAV3.2674	TGCTGTTGACAGTGAGCGATAGCATGTATTGTTTATTTTATAGTGAAGCCACAGATGTATAAAATAAACAATACATGCTACTGCCTACTGCCTCGGA	Pool_12
10451	VAV3.2225	TGCTGTTGACAGTGAGCGACAGGAGCATTAAGTTCTGAAATAGTGAAGCCACAGATGTATTTCAGAACTTAATGCTCCTGGTGCCTACTGCCTCGGA	Pool_12
10451	VAV3.733	TGCTGTTGACAGTGAGCGCAGGAGATGTGGTGAAGATTTATAGTGAAGCCACAGATGTATAAATCTTCACCACATCTCCTTTGCCTACTGCCTCGGA	Pool_12
10451	VAV3.402	TGCTGTTGACAGTGAGCGCAAGAGTCAGGAGAATATGCAATAGTGAAGCCACAGATGTATTGCATATTCTCCTGACTCTTTTGCCTACTGCCTCGGA	Pool_12
10451	VAV3.1729	TGCTGTTGACAGTGAGCGCTAGCAGCAGTATCTATTAATATAGTGAAGCCACAGATGTATATTAATAGATACTGCTGCTATTGCCTACTGCCTCGGA	Pool_12
56949	XAB2.1140	TGCTGTTGACAGTGAGCGACCGGGAGATCATCAACACCTATAGTGAAGCCACAGATGTATAGGTGTTGATGATCTCCCGGGTGCCTACTGCCTCGGA	Pool_12
56949	XAB2.1461	TGCTGTTGACAGTGAGCGCCCGCGTGTACAAGTCACTGAATAGTGAAGCCACAGATGTATTCAGTGACTTGTACACGCGGTTGCCTACTGCCTCGGA	Pool_12
56949	XAB2.2638	TGCTGTTGACAGTGAGCGCCAGCTACGTTTGTACATCAAATAGTGAAGCCACAGATGTATTTGATGTACAAACGTAGCTGTTGCCTACTGCCTCGGA	Pool_12
56949	XAB2.903	TGCTGTTGACAGTGAGCGCCACACAGGTGTTTGACAGCTATAGTGAAGCCACAGATGTATAGCTGTCAAACACCTGTGTGATGCCTACTGCCTCGGA	Pool_12
56949	XAB2.1905	TGCTGTTGACAGTGAGCGACCAGCAGTATGACATGTTCAATAGTGAAGCCACAGATGTATTGAACATGTCATACTGCTGGGTGCCTACTGCCTCGGA	Pool_12
56949	XAB2.180	TGCTGTTGACAGTGAGCGACAGGCTCAATCAGCTATACGATAGTGAAGCCACAGATGTATCGTATAGCTGATTGAGCCTGGTGCCTACTGCCTCGGA	Pool_12
7515	XRCC1.1947	TGCTGTTGACAGTGAGCGACCCGATGGATCTACAGTTGCATAGTGAAGCCACAGATGTATGCAACTGTAGATCCATCGGGGTGCCTACTGCCTCGGA	Pool_12
7515	XRCC1.197	TGCTGTTGACAGTGAGCGAAAGGCAGACACTTACCGAAAATAGTGAAGCCACAGATGTATTTTCGGTAAGTGTCTGCCTTGTGCCTACTGCCTCGGA	Pool_12
7515	XRCC1.2016	TGCTGTTGACAGTGAGCGAAAGCCTGAAGTATGTGCTATATAGTGAAGCCACAGATGTATATAGCACATACTTCAGGCTTGTGCCTACTGCCTCGGA	Pool_12
7515	XRCC1.1397	TGCTGTTGACAGTGAGCGACCCAAGCTTCCTCAGAAGCAATAGTGAAGCCACAGATGTATTGCTTCTGAGGAAGCTTGGGGTGCCTACTGCCTCGGA	Pool_12
7515	XRCC1.1859	TGCTGTTGACAGTGAGCGACGGGTTCAGTTTGTGATCACATAGTGAAGCCACAGATGTATGTGATCACAAACTGAACCCGGTGCCTACTGCCTCGGA	Pool_12
7515	XRCC1.1505	TGCTGTTGACAGTGAGCGCCCAGTGCTCCAGGAAGATATATAGTGAAGCCACAGATGTATATATCTTCCTGGAGCACTGGTTGCCTACTGCCTCGGA	Pool_12
7517	XRCC3.359	TGCTGTTGACAGTGAGCGACAGAATTATTGCTGCAATTAATAGTGAAGCCACAGATGTATTAATTGCAGCAATAATTCTGGTGCCTACTGCCTCGGA	Pool_12
7517	XRCC3.76	TGCTGTTGACAGTGAGCGACAGGGAGACACTTAAGGGAAATAGTGAAGCCACAGATGTATTTCCCTTAAGTGTCTCCCTGGTGCCTACTGCCTCGGA	Pool_12
7517	XRCC3.893	TGCTGTTGACAGTGAGCGCCACCTTGTTGGAGTGTGTGAATAGTGAAGCCACAGATGTATTCACACACTCCAACAAGGTGTTGCCTACTGCCTCGGA	Pool_12
7517	XRCC3.357	TGCTGTTGACAGTGAGCGCCCCAGAATTATTGCTGCAATTTAGTGAAGCCACAGATGTAAATTGCAGCAATAATTCTGGGATGCCTACTGCCTCGGA	Pool_12
7517	XRCC3.320	TGCTGTTGACAGTGAGCGACACCGACAAAATGGATTTGGATAGTGAAGCCACAGATGTATCCAAATCCATTTTGTCGGTGGTGCCTACTGCCTCGGA	Pool_12
7517	XRCC3.234	TGCTGTTGACAGTGAGCGCCAGGCTTTGAATTGAAGGCGATAGTGAAGCCACAGATGTATCGCCTTCAATTCAAAGCCTGTTGCCTACTGCCTCGGA	Pool_12
51776	ZAK.1120	TGCTGTTGACAGTGAGCGACAGGAGCTTAAAGAACGAGAATAGTGAAGCCACAGATGTATTCTCGTTCTTTAAGCTCCTGCTGCCTACTGCCTCGGA	Pool_12
51776	ZAK.1130	TGCTGTTGACAGTGAGCGCAAGAACGAGAAAGACGTTTAATAGTGAAGCCACAGATGTATTAAACGTCTTTCTCGTTCTTTTGCCTACTGCCTCGGA	Pool_12
51776	ZAK.34	TGCTGTTGACAGTGAGCGAAGGCGGAATGTTCAACTCCTATAGTGAAGCCACAGATGTATAGGAGTTGAACATTCCGCCTCTGCCTACTGCCTCGGA	Pool_12
51776	ZAK.597	TGCTGTTGACAGTGAGCGCCAGAGACCTCAAGTCAAGAAATAGTGAAGCCACAGATGTATTTCTTGACTTGAGGTCTCTGTTGCCTACTGCCTCGGA	Pool_12
51776	ZAK.390	TGCTGTTGACAGTGAGCGCCAGAAACATCATCCAGTTTTATAGTGAAGCCACAGATGTATAAAACTGGATGATGTTTCTGTTGCCTACTGCCTCGGA	Pool_12
51776	ZAK.607	TGCTGTTGACAGTGAGCGAAAGTCAAGAAACGTTGTTATATAGTGAAGCCACAGATGTATATAACAACGTTTCTTGACTTGTGCCTACTGCCTCGGA	Pool_12
93973	ACTR8.1756	TGCTGTTGACAGTGAGCGACAGCACAGAATTCTCAACAAATAGTGAAGCCACAGATGTATTTGTTGAGAATTCTGTGCTGCTGCCTACTGCCTCGGA	Pool_12
93973	ACTR8.526	TGCTGTTGACAGTGAGCGACAGATGCGACCTGCAATTTTATAGTGAAGCCACAGATGTATAAAATTGCAGGTCGCATCTGCTGCCTACTGCCTCGGA	Pool_12
93973	ACTR8.1046	TGCTGTTGACAGTGAGCGCCAAGATGTTTTTACTGGCTAATAGTGAAGCCACAGATGTATTAGCCAGTAAAAACATCTTGATGCCTACTGCCTCGGA	Pool_12
93973	ACTR8.2037	TGCTGTTGACAGTGAGCGCTACAGAATATGTGTATTGTAATAGTGAAGCCACAGATGTATTACAATACACATATTCTGTAATGCCTACTGCCTCGGA	Pool_12
93973	ACTR8.826	TGCTGTTGACAGTGAGCGCAAGCAGCATGTGAAAGAACTATAGTGAAGCCACAGATGTATAGTTCTTTCACATGCTGCTTATGCCTACTGCCTCGGA	Pool_12
93973	ACTR8.2010	TGCTGTTGACAGTGAGCGCAACAAGCTTCTTGGTATAAAATAGTGAAGCCACAGATGTATTTTATACCAAGAAGCTTGTTTTGCCTACTGCCTCGGA	Pool_12
121642	ALKBH2.657	TGCTGTTGACAGTGAGCGACACCGAGATGATGAAAGAGAATAGTGAAGCCACAGATGTATTCTCTTTCATCATCTCGGTGCTGCCTACTGCCTCGGA	Pool_12
121642	ALKBH2.111	TGCTGTTGACAGTGAGCGACACGGACGTGTTGCAGTGATATAGTGAAGCCACAGATGTATATCACTGCAACACGTCCGTGGTGCCTACTGCCTCGGA	Pool_12
121642	ALKBH2.806	TGCTGTTGACAGTGAGCGCCGGGAGCTTACTAATGATGAATAGTGAAGCCACAGATGTATTCATCATTAGTAAGCTCCCGTTGCCTACTGCCTCGGA	Pool_12
121642	ALKBH2.393	TGCTGTTGACAGTGAGCGACAAGAGTTGGAGAAAGAAGTATAGTGAAGCCACAGATGTATACTTCTTTCTCCAACTCTTGGTGCCTACTGCCTCGGA	Pool_12
121642	ALKBH2.238	TGCTGTTGACAGTGAGCGAGAGGAGACAAAGAAAGCACAATAGTGAAGCCACAGATGTATTGTGCTTTCTTTGTCTCCTCCTGCCTACTGCCTCGGA	Pool_12
121642	ALKBH2.905	TGCTGTTGACAGTGAGCGCTCGTAAAATTTTGCTTACTAATAGTGAAGCCACAGATGTATTAGTAAGCAAAATTTTACGAATGCCTACTGCCTCGGA	Pool_12
91801	ALKBH8.2485	TGCTGTTGACAGTGAGCGCAGGGATGTAATTATATGTTAATAGTGAAGCCACAGATGTATTAACATATAATTACATCCCTATGCCTACTGCCTCGGA	Pool_12
91801	ALKBH8.618	TGCTGTTGACAGTGAGCGCCAGAAGATACAGACAATCAAATAGTGAAGCCACAGATGTATTTGATTGTCTGTATCTTCTGTTGCCTACTGCCTCGGA	Pool_12
91801	ALKBH8.2484	TGCTGTTGACAGTGAGCGCTAGGGATGTAATTATATGTTATAGTGAAGCCACAGATGTATAACATATAATTACATCCCTAATGCCTACTGCCTCGGA	Pool_12
91801	ALKBH8.1082	TGCTGTTGACAGTGAGCGAACCAGTGATGTTGGAGACTTATAGTGAAGCCACAGATGTATAAGTCTCCAACATCACTGGTGTGCCTACTGCCTCGGA	Pool_12
91801	ALKBH8.617	TGCTGTTGACAGTGAGCGAACAGAAGATACAGACAATCAATAGTGAAGCCACAGATGTATTGATTGTCTGTATCTTCTGTCTGCCTACTGCCTCGGA	Pool_12
91801	ALKBH8.2643	TGCTGTTGACAGTGAGCGCAACGTTTAGTCAATCAGATAATAGTGAAGCCACAGATGTATTATCTGATTGACTAAACGTTATGCCTACTGCCTCGGA	Pool_12
200558	APLF.325	TGCTGTTGACAGTGAGCGCCAGCTGCGAATCAAACCGATATAGTGAAGCCACAGATGTATATCGGTTTGATTCGCAGCTGATGCCTACTGCCTCGGA	Pool_12
200558	APLF.821	TGCTGTTGACAGTGAGCGCAAGAAGAAATCTGCAAAGATATAGTGAAGCCACAGATGTATATCTTTGCAGATTTCTTCTTTTGCCTACTGCCTCGGA	Pool_12
200558	APLF.2777	TGCTGTTGACAGTGAGCGCAAGAATCTTTGTTAAATGCTATAGTGAAGCCACAGATGTATAGCATTTAACAAAGATTCTTTTGCCTACTGCCTCGGA	Pool_12
200558	APLF.3624	TGCTGTTGACAGTGAGCGACACGTGAACTATATATTTCAATAGTGAAGCCACAGATGTATTGAAATATATAGTTCACGTGCTGCCTACTGCCTCGGA	Pool_12
200558	APLF.3762	TGCTGTTGACAGTGAGCGCAACGATACAGTTTTAATGCAATAGTGAAGCCACAGATGTATTGCATTAAAACTGTATCGTTATGCCTACTGCCTCGGA	Pool_12
200558	APLF.952	TGCTGTTGACAGTGAGCGCCAGGAAGAGTCTACCATTTCATAGTGAAGCCACAGATGTATGAAATGGTAGACTCTTCCTGATGCCTACTGCCTCGGA	Pool_12
54840	APTX.105	TGCTGTTGACAGTGAGCGAACCAAGATCACTGATAAGAAATAGTGAAGCCACAGATGTATTTCTTATCAGTGATCTTGGTCTGCCTACTGCCTCGGA	Pool_12
54840	APTX.1502	TGCTGTTGACAGTGAGCGCAAGGTGGTTGGTGAATGAAAATAGTGAAGCCACAGATGTATTTTCATTCACCAACCACCTTTTGCCTACTGCCTCGGA	Pool_12
54840	APTX.758	TGCTGTTGACAGTGAGCGATGGGTTGCTTGTGAACTTCTATAGTGAAGCCACAGATGTATAGAAGTTCACAAGCAACCCAGTGCCTACTGCCTCGGA	Pool_12
54840	APTX.1264	TGCTGTTGACAGTGAGCGCTCAGTTCTTCACAGTGAGAAATAGTGAAGCCACAGATGTATTTCTCACTGTGAAGAACTGATTGCCTACTGCCTCGGA	Pool_12
54840	APTX.879	TGCTGTTGACAGTGAGCGCTGGGTTTGTCATAGATGTATTTAGTGAAGCCACAGATGTAAATACATCTATGACAAACCCAATGCCTACTGCCTCGGA	Pool_12
54840	APTX.978	TGCTGTTGACAGTGAGCGCAGCCATGTTCACACTGACCTATAGTGAAGCCACAGATGTATAGGTCAGTGTGAACATGGCTTTGCCTACTGCCTCGGA	Pool_12
79915	ATAD5.3282	TGCTGTTGACAGTGAGCGCTCCGAGTGTCATAGTAAACAATAGTGAAGCCACAGATGTATTGTTTACTATGACACTCGGAATGCCTACTGCCTCGGA	Pool_12
79915	ATAD5.3352	TGCTGTTGACAGTGAGCGAAAGCAGAAAATTCTAAGTCAATAGTGAAGCCACAGATGTATTGACTTAGAATTTTCTGCTTCTGCCTACTGCCTCGGA	Pool_12
79915	ATAD5.1657	TGCTGTTGACAGTGAGCGATAGGAAGAGATGATAATTCTATAGTGAAGCCACAGATGTATAGAATTATCATCTCTTCCTACTGCCTACTGCCTCGGA	Pool_12
79915	ATAD5.580	TGCTGTTGACAGTGAGCGCTAGGGAAAGAGTGCAAGATAATAGTGAAGCCACAGATGTATTATCTTGCACTCTTTCCCTAATGCCTACTGCCTCGGA	Pool_12
79915	ATAD5.1431	TGCTGTTGACAGTGAGCGCCAGACAGTTCAGAAAAGAAAATAGTGAAGCCACAGATGTATTTTCTTTTCTGAACTGTCTGTTGCCTACTGCCTCGGA	Pool_12
79915	ATAD5.2583	TGCTGTTGACAGTGAGCGCACAGAAGATTCTGTTATAATATAGTGAAGCCACAGATGTATATTATAACAGAATCTTCTGTTTGCCTACTGCCTCGGA	Pool_12
472	ATM.924	TGCTGTTGACAGTGAGCGCCAAGATGTTCATAGAGTTTTATAGTGAAGCCACAGATGTATAAAACTCTATGAACATCTTGTTGCCTACTGCCTCGGA	Pool_12
472	ATM.8670	TGCTGTTGACAGTGAGCGCCAGCGAAGTGGTGTTCTTGAATAGTGAAGCCACAGATGTATTCAAGAACACCACTTCGCTGATGCCTACTGCCTCGGA	Pool_12
472	ATM.12581	TGCTGTTGACAGTGAGCGCAGGCAAGAAGATAGTAAATTATAGTGAAGCCACAGATGTATAATTTACTATCTTCTTGCCTTTGCCTACTGCCTCGGA	Pool_12
472	ATM.4713	TGCTGTTGACAGTGAGCGCCACCTGTTTGTTAGTTTATTATAGTGAAGCCACAGATGTATAATAAACTAACAAACAGGTGATGCCTACTGCCTCGGA	Pool_12
472	ATM.3334	TGCTGTTGACAGTGAGCGAACCAAGATGTTTGTAAAACTATAGTGAAGCCACAGATGTATAGTTTTACAAACATCTTGGTCTGCCTACTGCCTCGGA	Pool_12
472	ATM.383	TGCTGTTGACAGTGAGCGAAACCATGAGTCTAGTACTTAATAGTGAAGCCACAGATGTATTAAGTACTAGACTCATGGTTCTGCCTACTGCCTCGGA	Pool_12
84126	ATRIP.2028	TGCTGTTGACAGTGAGCGCCACGGTGATGTTGCACAGACATAGTGAAGCCACAGATGTATGTCTGTGCAACATCACCGTGATGCCTACTGCCTCGGA	Pool_12
84126	ATRIP.342	TGCTGTTGACAGTGAGCGCCAGAGAAACTGTTCCAATTAATAGTGAAGCCACAGATGTATTAATTGGAACAGTTTCTCTGTTGCCTACTGCCTCGGA	Pool_12
84126	ATRIP.932	TGCTGTTGACAGTGAGCGAACAGCTGGAGACAGAGATCAATAGTGAAGCCACAGATGTATTGATCTCTGTCTCCAGCTGTCTGCCTACTGCCTCGGA	Pool_12
84126	ATRIP.933	TGCTGTTGACAGTGAGCGCCAGCTGGAGACAGAGATCAAATAGTGAAGCCACAGATGTATTTGATCTCTGTCTCCAGCTGTTGCCTACTGCCTCGGA	Pool_12
84126	ATRIP.697	TGCTGTTGACAGTGAGCGCTCCCATGTCAGTCCTAGGAAATAGTGAAGCCACAGATGTATTTCCTAGGACTGACATGGGAATGCCTACTGCCTCGGA	Pool_12
84126	ATRIP.658	TGCTGTTGACAGTGAGCGAACCAGTGAACGAGCAAATAAATAGTGAAGCCACAGATGTATTTATTTGCTCGTTCACTGGTCTGCCTACTGCCTCGGA	Pool_12
7917	BAG6.2220	TGCTGTTGACAGTGAGCGACCGGTTGCTGGAGTTGTGTAATAGTGAAGCCACAGATGTATTACACAACTCCAGCAACCGGGTGCCTACTGCCTCGGA	Pool_12
7917	BAG6.2799	TGCTGTTGACAGTGAGCGCCACAGTATTTAAGAAATAAAATAGTGAAGCCACAGATGTATTTTATTTCTTAAATACTGTGATGCCTACTGCCTCGGA	Pool_12
7917	BAG6.538	TGCTGTTGACAGTGAGCGAAGGGATATACAGACCTTACTATAGTGAAGCCACAGATGTATAGTAAGGTCTGTATATCCCTGTGCCTACTGCCTCGGA	Pool_12
7917	BAG6.453	TGCTGTTGACAGTGAGCGATGCTGTGGATGTTCACATCAATAGTGAAGCCACAGATGTATTGATGTGAACATCCACAGCAGTGCCTACTGCCTCGGA	Pool_12
7917	BAG6.918	TGCTGTTGACAGTGAGCGACACCACGGACTACAATAACAATAGTGAAGCCACAGATGTATTGTTATTGTAGTCCGTGGTGGTGCCTACTGCCTCGGA	Pool_12
7917	BAG6.1152	TGCTGTTGACAGTGAGCGACACTGTGACCATGACAGGAAATAGTGAAGCCACAGATGTATTTCCTGTCATGGTCACAGTGGTGCCTACTGCCTCGGA	Pool_12
80233	C17orf70.1417	TGCTGTTGACAGTGAGCGCCAGAGAGTGCAGGTCAGAAAATAGTGAAGCCACAGATGTATTTTCTGACCTGCACTCTCTGTTGCCTACTGCCTCGGA	Pool_12
80233	C17orf70.2850	TGCTGTTGACAGTGAGCGATAGGAGCAGAACGCTCATGAATAGTGAAGCCACAGATGTATTCATGAGCGTTCTGCTCCTACTGCCTACTGCCTCGGA	Pool_12
80233	C17orf70.518	TGCTGTTGACAGTGAGCGACCGATGGAAGATGCAGCTGTTTAGTGAAGCCACAGATGTAAACAGCTGCATCTTCCATCGGGTGCCTACTGCCTCGGA	Pool_12
80233	C17orf70.2424	TGCTGTTGACAGTGAGCGAGCCGTGGAGATTCAAGTGGAATAGTGAAGCCACAGATGTATTCCACTTGAATCTCCACGGCCTGCCTACTGCCTCGGA	Pool_12
80233	C17orf70.1475	TGCTGTTGACAGTGAGCGCGAGAGTGTCTTTTCTAAAGAATAGTGAAGCCACAGATGTATTCTTTAGAAAAGACACTCTCTTGCCTACTGCCTCGGA	Pool_12
80233	C17orf70.1420	TGCTGTTGACAGTGAGCGAAGAGTGCAGGTCAGAAAATAATAGTGAAGCCACAGATGTATTATTTTCTGACCTGCACTCTCTGCCTACTGCCTCGGA	Pool_12
8555	CDC14B.4213	TGCTGTTGACAGTGAGCGCCAGCTTCTCTTTCTACATTAATAGTGAAGCCACAGATGTATTAATGTAGAAAGAGAAGCTGTTGCCTACTGCCTCGGA	Pool_12
8555	CDC14B.151	TGCTGTTGACAGTGAGCGACAAGATCAATAAGAAATTAAATAGTGAAGCCACAGATGTATTTAATTTCTTATTGATCTTGCTGCCTACTGCCTCGGA	Pool_12
8555	CDC14B.4787	TGCTGTTGACAGTGAGCGATGGGTTGTAACTGGTTTTATATAGTGAAGCCACAGATGTATATAAAACCAGTTACAACCCACTGCCTACTGCCTCGGA	Pool_12
8555	CDC14B.4631	TGCTGTTGACAGTGAGCGCCAGCGTATATTTCTAATCATATAGTGAAGCCACAGATGTATATGATTAGAAATATACGCTGTTGCCTACTGCCTCGGA	Pool_12
8555	CDC14B.1252	TGCTGTTGACAGTGAGCGAAAGGAAGACTCTAGGACTGAATAGTGAAGCCACAGATGTATTCAGTCCTAGAGTCTTCCTTCTGCCTACTGCCTCGGA	Pool_12
8555	CDC14B.3578	TGCTGTTGACAGTGAGCGCTAGAGTCGTTGTTATAGAAGATAGTGAAGCCACAGATGTATCTTCTATAACAACGACTCTAATGCCTACTGCCTCGGA	Pool_12
113130	CDCA5.565	TGCTGTTGACAGTGAGCGACAGAGACTTGGAAATGTCTAATAGTGAAGCCACAGATGTATTAGACATTTCCAAGTCTCTGGTGCCTACTGCCTCGGA	Pool_12
113130	CDCA5.1552	TGCTGTTGACAGTGAGCGATCAGACCATAAGTGTGTACTATAGTGAAGCCACAGATGTATAGTACACACTTATGGTCTGAGTGCCTACTGCCTCGGA	Pool_12
113130	CDCA5.1575	TGCTGTTGACAGTGAGCGCCAGAAGCTGTGTTTTCTAGTTTAGTGAAGCCACAGATGTAAACTAGAAAACACAGCTTCTGTTGCCTACTGCCTCGGA	Pool_12
113130	CDCA5.809	TGCTGTTGACAGTGAGCGCCAGAAACGTAAGAAGAAGAAATAGTGAAGCCACAGATGTATTTCTTCTTCTTACGTTTCTGTTGCCTACTGCCTCGGA	Pool_12
113130	CDCA5.461	TGCTGTTGACAGTGAGCGCAAGGAGGACCTTTTCAAGACATAGTGAAGCCACAGATGTATGTCTTGAAAAGGTCCTCCTTATGCCTACTGCCTCGGA	Pool_12
113130	CDCA5.1839	TGCTGTTGACAGTGAGCGAGCCCTAGAAGAGAAAGTTGAATAGTGAAGCCACAGATGTATTCAACTTTCTCTTCTAGGGCCTGCCTACTGCCTCGGA	Pool_12
1022	CDK7.911	TGCTGTTGACAGTGAGCGCTCCAGATTATGTGACATTTAATAGTGAAGCCACAGATGTATTAAATGTCACATAATCTGGAATGCCTACTGCCTCGGA	Pool_12
1022	CDK7.605	TGCTGTTGACAGTGAGCGCCAACTTGTTGCTAGATGAAAATAGTGAAGCCACAGATGTATTTTCATCTAGCAACAAGTTGTTGCCTACTGCCTCGGA	Pool_12
1022	CDK7.894	TGCTGTTGACAGTGAGCGACCGGACATGTGTAGTCTTCCATAGTGAAGCCACAGATGTATGGAAGACTACACATGTCCGGCTGCCTACTGCCTCGGA	Pool_12
1022	CDK7.771	TGCTGTTGACAGTGAGCGATGGGCTGTTGGCTGTATATTATAGTGAAGCCACAGATGTATAATATACAGCCAACAGCCCACTGCCTACTGCCTCGGA	Pool_12
1022	CDK7.317	TGCTGTTGACAGTGAGCGCTGGACATAGATCAGAAGCTAATAGTGAAGCCACAGATGTATTAGCTTCTGATCTATGTCCAATGCCTACTGCCTCGGA	Pool_12
1022	CDK7.381	TGCTGTTGACAGTGAGCGCCAGGAGCTAAGTCATCCAAATTAGTGAAGCCACAGATGTAATTTGGATGACTTAGCTCCTGTTGCCTACTGCCTCGGA	Pool_12
1025	CDK9.2329	TGCTGTTGACAGTGAGCGAAAGAGACATTCTGGAGGTCAATAGTGAAGCCACAGATGTATTGACCTCCAGAATGTCTCTTCTGCCTACTGCCTCGGA	Pool_12
1025	CDK9.1749	TGCTGTTGACAGTGAGCGATCCGTTAGAATTAAAAGTTGATAGTGAAGCCACAGATGTATCAACTTTTAATTCTAACGGACTGCCTACTGCCTCGGA	Pool_12
1025	CDK9.1685	TGCTGTTGACAGTGAGCGCCAGGAGAATTTTACTGTGTTTTAGTGAAGCCACAGATGTAAAACACAGTAAAATTCTCCTGTTGCCTACTGCCTCGGA	Pool_12
1025	CDK9.1880	TGCTGTTGACAGTGAGCGCTGGGACTTGATTGTCAAGTCATAGTGAAGCCACAGATGTATGACTTGACAATCAAGTCCCAATGCCTACTGCCTCGGA	Pool_12
1025	CDK9.1750	TGCTGTTGACAGTGAGCGCCCGTTAGAATTAAAAGTTGAATAGTGAAGCCACAGATGTATTCAACTTTTAATTCTAACGGATGCCTACTGCCTCGGA	Pool_12
1025	CDK9.326	TGCTGTTGACAGTGAGCGAAAGATCCTTCAGCTTCTAAAATAGTGAAGCCACAGATGTATTTTAGAAGCTGAAGGATCTTGTGCCTACTGCCTCGGA	Pool_12
1655	DDX5.1392	TGCTGTTGACAGTGAGCGATGGGTTCTAAATGAATTCAAATAGTGAAGCCACAGATGTATTTGAATTCATTTAGAACCCAGTGCCTACTGCCTCGGA	Pool_12
1655	DDX5.2304	TGCTGTTGACAGTGAGCGACAGTGTTTTCACAAAAGTAAATAGTGAAGCCACAGATGTATTTACTTTTGTGAAAACACTGCTGCCTACTGCCTCGGA	Pool_12
1655	DDX5.1978	TGCTGTTGACAGTGAGCGCACGGAAGTAATGTTCCAAATATAGTGAAGCCACAGATGTATATTTGGAACATTACTTCCGTATGCCTACTGCCTCGGA	Pool_12
1655	DDX5.1038	TGCTGTTGACAGTGAGCGAAAGATTGTGGATCAAATAAGATAGTGAAGCCACAGATGTATCTTATTTGATCCACAATCTTCTGCCTACTGCCTCGGA	Pool_12
1655	DDX5.2086	TGCTGTTGACAGTGAGCGCCCCAATAAGACTTTAGAAGTATAGTGAAGCCACAGATGTATACTTCTAAAGTCTTATTGGGATGCCTACTGCCTCGGA	Pool_12
1655	DDX5.1034	TGCTGTTGACAGTGAGCGCAAGGAAGATTGTGGATCAAATTAGTGAAGCCACAGATGTAATTTGATCCACAATCTTCCTTATGCCTACTGCCTCGGA	Pool_12
80820	EEPD1.4070	TGCTGTTGACAGTGAGCGACAGGGTTAGCATTAAAGTCAATAGTGAAGCCACAGATGTATTGACTTTAATGCTAACCCTGCTGCCTACTGCCTCGGA	Pool_12
80820	EEPD1.2341	TGCTGTTGACAGTGAGCGAACGAGCGATGATGACACCAAATAGTGAAGCCACAGATGTATTTGGTGTCATCATCGCTCGTGTGCCTACTGCCTCGGA	Pool_12
80820	EEPD1.2340	TGCTGTTGACAGTGAGCGACACGAGCGATGATGACACCAATAGTGAAGCCACAGATGTATTGGTGTCATCATCGCTCGTGCTGCCTACTGCCTCGGA	Pool_12
80820	EEPD1.4635	TGCTGTTGACAGTGAGCGCAGCTACAGTGTTCATAGTTTATAGTGAAGCCACAGATGTATAAACTATGAACACTGTAGCTATGCCTACTGCCTCGGA	Pool_12
80820	EEPD1.2245	TGCTGTTGACAGTGAGCGATAGCCGAGTTCTACACTGAAATAGTGAAGCCACAGATGTATTTCAGTGTAGAACTCGGCTAGTGCCTACTGCCTCGGA	Pool_12
80820	EEPD1.1524	TGCTGTTGACAGTGAGCGAAAGCTTCTAGCTGTGCAAGAATAGTGAAGCCACAGATGTATTCTTGCACAGCTAGAAGCTTGTGCCTACTGCCTCGGA	Pool_12
146956	EME1.626	TGCTGTTGACAGTGAGCGACAGCAGCTTGGCAGTAACCAATAGTGAAGCCACAGATGTATTGGTTACTGCCAAGCTGCTGCTGCCTACTGCCTCGGA	Pool_12
146956	EME1.336	TGCTGTTGACAGTGAGCGCAGCAGTGAAAGTGAAGATGAATAGTGAAGCCACAGATGTATTCATCTTCACTTTCACTGCTTTGCCTACTGCCTCGGA	Pool_12
146956	EME1.2134	TGCTGTTGACAGTGAGCGCTCCAAAAGAATTAGCATCAAATAGTGAAGCCACAGATGTATTTGATGCTAATTCTTTTGGATTGCCTACTGCCTCGGA	Pool_12
146956	EME1.2101	TGCTGTTGACAGTGAGCGATCCACTCAGACACTTATTTAATAGTGAAGCCACAGATGTATTAAATAAGTGTCTGAGTGGACTGCCTACTGCCTCGGA	Pool_12
146956	EME1.1632	TGCTGTTGACAGTGAGCGCCAGCAGTGTTTTTCGGATAAATAGTGAAGCCACAGATGTATTTATCCGAAAAACACTGCTGATGCCTACTGCCTCGGA	Pool_12
146956	EME1.295	TGCTGTTGACAGTGAGCGCTAGCTGAAACTGTCACACAAATAGTGAAGCCACAGATGTATTTGTGTGACAGTTTCAGCTATTGCCTACTGCCTCGGA	Pool_12
2033	EP300.4862	TGCTGTTGACAGTGAGCGAAAGCTACTGAAGATAGATTAATAGTGAAGCCACAGATGTATTAATCTATCTTCAGTAGCTTGTGCCTACTGCCTCGGA	Pool_12
2033	EP300.2316	TGCTGTTGACAGTGAGCGCCCAGAAAGAACTAGAAGAAAATAGTGAAGCCACAGATGTATTTTCTTCTAGTTCTTTCTGGATGCCTACTGCCTCGGA	Pool_12
2033	EP300.3929	TGCTGTTGACAGTGAGCGCACGGCAAACAGTTGTGCACAATAGTGAAGCCACAGATGTATTGTGCACAACTGTTTGCCGTATGCCTACTGCCTCGGA	Pool_12
2033	EP300.517	TGCTGTTGACAGTGAGCGACACGACTTACCAGATGAATTATAGTGAAGCCACAGATGTATAATTCATCTGGTAAGTCGTGCTGCCTACTGCCTCGGA	Pool_12
2033	EP300.4871	TGCTGTTGACAGTGAGCGAAAGATAGATTAACAAGTGCAATAGTGAAGCCACAGATGTATTGCACTTGTTAATCTATCTTCTGCCTACTGCCTCGGA	Pool_12
2033	EP300.8487	TGCTGTTGACAGTGAGCGATGGGATGATTTTAACATGCAATAGTGAAGCCACAGATGTATTGCATGTTAAAATCATCCCACTGCCTACTGCCTCGGA	Pool_12
2072	ERCC4.1003	TGCTGTTGACAGTGAGCGACAGCACCTCGATGTTTATAAATAGTGAAGCCACAGATGTATTTATAAACATCGAGGTGCTGGTGCCTACTGCCTCGGA	Pool_12
2072	ERCC4.1373	TGCTGTTGACAGTGAGCGAAAGGAAGACAGTTCAAAGAGATAGTGAAGCCACAGATGTATCTCTTTGAACTGTCTTCCTTCTGCCTACTGCCTCGGA	Pool_12
2072	ERCC4.626	TGCTGTTGACAGTGAGCGCCAGCACAAACCTGAAGTTGTATAGTGAAGCCACAGATGTATACAACTTCAGGTTTGTGCTGTTGCCTACTGCCTCGGA	Pool_12
2072	ERCC4.592	TGCTGTTGACAGTGAGCGAAAGGTTCCATGTAGCAGTAAATAGTGAAGCCACAGATGTATTTACTGCTACATGGAACCTTGTGCCTACTGCCTCGGA	Pool_12
2072	ERCC4.1377	TGCTGTTGACAGTGAGCGAAAGACAGTTCAAAGAGAATTATAGTGAAGCCACAGATGTATAATTCTCTTTGAACTGTCTTCTGCCTACTGCCTCGGA	Pool_12
2072	ERCC4.746	TGCTGTTGACAGTGAGCGCTCGCTTGAAGTGGAAGATTTATAGTGAAGCCACAGATGTATAAATCTTCCACTTCAAGCGATTGCCTACTGCCTCGGA	Pool_12
2073	ERCC5.3431	TGCTGTTGACAGTGAGCGCCAGGAGAAAGAAGATGCTAAATAGTGAAGCCACAGATGTATTTAGCATCTTCTTTCTCCTGTTGCCTACTGCCTCGGA	Pool_12
2073	ERCC5.3654	TGCTGTTGACAGTGAGCGCCAGATTCTAAACGAAAGAATATAGTGAAGCCACAGATGTATATTCTTTCGTTTAGAATCTGATGCCTACTGCCTCGGA	Pool_12
2073	ERCC5.2721	TGCTGTTGACAGTGAGCGCCCGGACAGATGTTCCTGGAAATAGTGAAGCCACAGATGTATTTCCAGGAACATCTGTCCGGTTGCCTACTGCCTCGGA	Pool_12
2073	ERCC5.2911	TGCTGTTGACAGTGAGCGCAAACAAGTTTGTAGAATATTATAGTGAAGCCACAGATGTATAATATTCTACAAACTTGTTTTTGCCTACTGCCTCGGA	Pool_12
2073	ERCC5.1613	TGCTGTTGACAGTGAGCGCGACGATGACGAAGATGTAAAATAGTGAAGCCACAGATGTATTTTACATCTTCGTCATCGTCATGCCTACTGCCTCGGA	Pool_12
2073	ERCC5.1160	TGCTGTTGACAGTGAGCGACAGCATATAGAACATGTCCAATAGTGAAGCCACAGATGTATTGGACATGTTCTATATGCTGGTGCCTACTGCCTCGGA	Pool_12
2070	EYA4.2068	TGCTGTTGACAGTGAGCGAAAGGTTCTACTCTATAGTTTATAGTGAAGCCACAGATGTATAAACTATAGAGTAGAACCTTCTGCCTACTGCCTCGGA	Pool_12
2070	EYA4.4298	TGCTGTTGACAGTGAGCGCTAGCTTGAAAATAGCAGTTAATAGTGAAGCCACAGATGTATTAACTGCTATTTTCAAGCTAATGCCTACTGCCTCGGA	Pool_12
2070	EYA4.639	TGCTGTTGACAGTGAGCGACAGCACATCAGTTACTACAAATAGTGAAGCCACAGATGTATTTGTAGTAACTGATGTGCTGCTGCCTACTGCCTCGGA	Pool_12
2070	EYA4.5388	TGCTGTTGACAGTGAGCGAAAGGGTTTCTGTTATGTATTATAGTGAAGCCACAGATGTATAATACATAACAGAAACCCTTGTGCCTACTGCCTCGGA	Pool_12
2070	EYA4.3877	TGCTGTTGACAGTGAGCGACACCTGCAGTTCTGTGTTTAATAGTGAAGCCACAGATGTATTAAACACAGAACTGCAGGTGCTGCCTACTGCCTCGGA	Pool_12
2070	EYA4.1851	TGCTGTTGACAGTGAGCGCCAGAAGAGTAAAAGAATTATATAGTGAAGCCACAGATGTATATAATTCTTTTACTCTTCTGTTGCCTACTGCCTCGGA	Pool_12
84142	FAM175A.1146	TGCTGTTGACAGTGAGCGATCGGTTGTTAGATACACAAGATAGTGAAGCCACAGATGTATCTTGTGTATCTAACAACCGAGTGCCTACTGCCTCGGA	Pool_12
84142	FAM175A.799	TGCTGTTGACAGTGAGCGCAAGGATGTAAACAGATTAAAATAGTGAAGCCACAGATGTATTTTAATCTGTTTACATCCTTTTGCCTACTGCCTCGGA	Pool_12
84142	FAM175A.2573	TGCTGTTGACAGTGAGCGCCCCGATATCTGATGTTACAAATAGTGAAGCCACAGATGTATTTGTAACATCAGATATCGGGATGCCTACTGCCTCGGA	Pool_12
84142	FAM175A.430	TGCTGTTGACAGTGAGCGACAGGAGCATTTTTCAAACCAATAGTGAAGCCACAGATGTATTGGTTTGAAAAATGCTCCTGCTGCCTACTGCCTCGGA	Pool_12
84142	FAM175A.1927	TGCTGTTGACAGTGAGCGCCACAACTATAACACAACACAATAGTGAAGCCACAGATGTATTGTGTTGTGTTATAGTTGTGTTGCCTACTGCCTCGGA	Pool_12
84142	FAM175A.2642	TGCTGTTGACAGTGAGCGCACCCTGTAAAGAGATAATTAATAGTGAAGCCACAGATGTATTAATTATCTCTTTACAGGGTTTGCCTACTGCCTCGGA	Pool_12
2175	FANCA.473	TGCTGTTGACAGTGAGCGCAAGAAGCTGTCTTCCCTGTTATAGTGAAGCCACAGATGTATAACAGGGAAGACAGCTTCTTTTGCCTACTGCCTCGGA	Pool_12
2175	FANCA.268	TGCTGTTGACAGTGAGCGCCAGCAAAGTGATTGACTGTGATAGTGAAGCCACAGATGTATCACAGTCAATCACTTTGCTGATGCCTACTGCCTCGGA	Pool_12
2175	FANCA.237	TGCTGTTGACAGTGAGCGATAGAAGGTCCACTGTGTAAAATAGTGAAGCCACAGATGTATTTTACACAGTGGACCTTCTACTGCCTACTGCCTCGGA	Pool_12
2175	FANCA.297	TGCTGTTGACAGTGAGCGAAGGCCTATGCTAATCATTCTATAGTGAAGCCACAGATGTATAGAATGATTAGCATAGGCCTCTGCCTACTGCCTCGGA	Pool_12
2175	FANCA.842	TGCTGTTGACAGTGAGCGAACGGTTGATGTACTGCAGAGATAGTGAAGCCACAGATGTATCTCTGCAGTACATCAACCGTGTGCCTACTGCCTCGGA	Pool_12
2175	FANCA.492	TGCTGTTGACAGTGAGCGCTAGAGTTTGCTCAGTATTTATTAGTGAAGCCACAGATGTAATAAATACTGAGCAAACTCTAATGCCTACTGCCTCGGA	Pool_12
2177	FANCD2.3854	TGCTGTTGACAGTGAGCGACAGCAGATTCATGAAGAGAAATAGTGAAGCCACAGATGTATTTCTCTTCATGAATCTGCTGCTGCCTACTGCCTCGGA	Pool_12
2177	FANCD2.1774	TGCTGTTGACAGTGAGCGATAGCACCGTATTCAAGTACAATAGTGAAGCCACAGATGTATTGTACTTGAATACGGTGCTAGTGCCTACTGCCTCGGA	Pool_12
2177	FANCD2.263	TGCTGTTGACAGTGAGCGCACGGGAGAGAGTCAGAATCAATAGTGAAGCCACAGATGTATTGATTCTGACTCTCTCCCGTTTGCCTACTGCCTCGGA	Pool_12
2177	FANCD2.2330	TGCTGTTGACAGTGAGCGAGAGGAGATTGATGGTCTACTATAGTGAAGCCACAGATGTATAGTAGACCATCAATCTCCTCCTGCCTACTGCCTCGGA	Pool_12
2177	FANCD2.1249	TGCTGTTGACAGTGAGCGCTAGCACCAATACTCAGACAAATAGTGAAGCCACAGATGTATTTGTCTGAGTATTGGTGCTATTGCCTACTGCCTCGGA	Pool_12
2177	FANCD2.4043	TGCTGTTGACAGTGAGCGACGGGAAGATGTTCTGAGCTTATAGTGAAGCCACAGATGTATAAGCTCAGAACATCTTCCCGGTGCCTACTGCCTCGGA	Pool_12
55120	FANCL.901	TGCTGTTGACAGTGAGCGACAGAAAATAGTGTGTTACAAATAGTGAAGCCACAGATGTATTTGTAACACACTATTTTCTGGTGCCTACTGCCTCGGA	Pool_12
55120	FANCL.646	TGCTGTTGACAGTGAGCGCTGGCAGCAATAGAATCACTAATAGTGAAGCCACAGATGTATTAGTGATTCTATTGCTGCCAATGCCTACTGCCTCGGA	Pool_12
55120	FANCL.210	TGCTGTTGACAGTGAGCGCCAACTGAAGAATGCAAGATTATAGTGAAGCCACAGATGTATAATCTTGCATTCTTCAGTTGTTGCCTACTGCCTCGGA	Pool_12
55120	FANCL.1111	TGCTGTTGACAGTGAGCGATAACTAGTAGACAGAGTTTTATAGTGAAGCCACAGATGTATAAAACTCTGTCTACTAGTTAGTGCCTACTGCCTCGGA	Pool_12
55120	FANCL.749	TGCTGTTGACAGTGAGCGAACGCAGAATTGCATTAGGTAATAGTGAAGCCACAGATGTATTACCTAATGCAATTCTGCGTGTGCCTACTGCCTCGGA	Pool_12
55120	FANCL.900	TGCTGTTGACAGTGAGCGCCCAGAAAATAGTGTGTTACAATAGTGAAGCCACAGATGTATTGTAACACACTATTTTCTGGATGCCTACTGCCTCGGA	Pool_12
57697	FANCM.6498	TGCTGTTGACAGTGAGCGCAAGGATAGTTTAAGAAAGTAATAGTGAAGCCACAGATGTATTACTTTCTTAAACTATCCTTATGCCTACTGCCTCGGA	Pool_12
57697	FANCM.7089	TGCTGTTGACAGTGAGCGACAGGACTGTGAGTCAATTAAATAGTGAAGCCACAGATGTATTTAATTGACTCACAGTCCTGCTGCCTACTGCCTCGGA	Pool_12
57697	FANCM.2874	TGCTGTTGACAGTGAGCGCCAGAGTGTCAGTTTACAAATATAGTGAAGCCACAGATGTATATTTGTAAACTGACACTCTGTTGCCTACTGCCTCGGA	Pool_12
57697	FANCM.5762	TGCTGTTGACAGTGAGCGACAGAGTATGTTTGAAAGAATATAGTGAAGCCACAGATGTATATTCTTTCAAACATACTCTGCTGCCTACTGCCTCGGA	Pool_12
57697	FANCM.2183	TGCTGTTGACAGTGAGCGCAGGGACAGTGATGAAATTAAATAGTGAAGCCACAGATGTATTTAATTTCATCACTGTCCCTTTGCCTACTGCCTCGGA	Pool_12
57697	FANCM.5176	TGCTGTTGACAGTGAGCGAAAGCACTGTTAAGAAGAACAATAGTGAAGCCACAGATGTATTGTTCTTCTTAACAGTGCTTGTGCCTACTGCCTCGGA	Pool_12
79791	FBXO31.3187	TGCTGTTGACAGTGAGCGATGGGAGAAAGACTCACGAGAATAGTGAAGCCACAGATGTATTCTCGTGAGTCTTTCTCCCAGTGCCTACTGCCTCGGA	Pool_12
79791	FBXO31.3139	TGCTGTTGACAGTGAGCGACAGAGTCAGAGAATTGGCAAATAGTGAAGCCACAGATGTATTTGCCAATTCTCTGACTCTGGTGCCTACTGCCTCGGA	Pool_12
79791	FBXO31.454	TGCTGTTGACAGTGAGCGAAAGCTGCTTCACCGATATAGATAGTGAAGCCACAGATGTATCTATATCGGTGAAGCAGCTTCTGCCTACTGCCTCGGA	Pool_12
79791	FBXO31.382	TGCTGTTGACAGTGAGCGCGAGGAGTATGGTGTTTGCGAATAGTGAAGCCACAGATGTATTCGCAAACACCATACTCCTCATGCCTACTGCCTCGGA	Pool_12
79791	FBXO31.586	TGCTGTTGACAGTGAGCGACACGTCGATGACCCTATGAGATAGTGAAGCCACAGATGTATCTCATAGGGTCATCGACGTGGTGCCTACTGCCTCGGA	Pool_12
79791	FBXO31.3580	TGCTGTTGACAGTGAGCGAACGCACGTGCTTCTGATTAAATAGTGAAGCCACAGATGTATTTAATCAGAAGCACGTGCGTCTGCCTACTGCCTCGGA	Pool_12
1112	FOXN3.6055	TGCTGTTGACAGTGAGCGACAGCACTGTGATCTAATTTAATAGTGAAGCCACAGATGTATTAAATTAGATCACAGTGCTGCTGCCTACTGCCTCGGA	Pool_12
1112	FOXN3.598	TGCTGTTGACAGTGAGCGACAGAGTATAGACAAAATCTAATAGTGAAGCCACAGATGTATTAGATTTTGTCTATACTCTGGTGCCTACTGCCTCGGA	Pool_12
1112	FOXN3.2752	TGCTGTTGACAGTGAGCGCAACAAAGTTCTTGTAAGGTAATAGTGAAGCCACAGATGTATTACCTTACAAGAACTTTGTTATGCCTACTGCCTCGGA	Pool_12
1112	FOXN3.4741	TGCTGTTGACAGTGAGCGAAAGCCTATTTGTGAAAGAATATAGTGAAGCCACAGATGTATATTCTTTCACAAATAGGCTTGTGCCTACTGCCTCGGA	Pool_12
1112	FOXN3.1474	TGCTGTTGACAGTGAGCGCCAGCATGTCAGGAGATTTCTATAGTGAAGCCACAGATGTATAGAAATCTCCTGACATGCTGATGCCTACTGCCTCGGA	Pool_12
1112	FOXN3.592	TGCTGTTGACAGTGAGCGCTAGACCCAGAGTATAGACAAATAGTGAAGCCACAGATGTATTTGTCTATACTCTGGGTCTATTGCCTACTGCCTCGGA	Pool_12
10912	GADD45G.367	TGCTGTTGACAGTGAGCGATGCGAGAACGACATCGACATATAGTGAAGCCACAGATGTATATGTCGATGTCGTTCTCGCAGTGCCTACTGCCTCGGA	Pool_12
10912	GADD45G.1032	TGCTGTTGACAGTGAGCGAAAGCTTTGAATTTTACAATAATAGTGAAGCCACAGATGTATTATTGTAAAATTCAAAGCTTCTGCCTACTGCCTCGGA	Pool_12
10912	GADD45G.995	TGCTGTTGACAGTGAGCGACGGGCAATGCTTCGTTTTCTATAGTGAAGCCACAGATGTATAGAAAACGAAGCATTGCCCGGTGCCTACTGCCTCGGA	Pool_12
10912	GADD45G.105	TGCTGTTGACAGTGAGCGCTCGCACTATGACTCTGGAAGATAGTGAAGCCACAGATGTATCTTCCAGAGTCATAGTGCGATTGCCTACTGCCTCGGA	Pool_12
10912	GADD45G.1033	TGCTGTTGACAGTGAGCGCAGCTTTGAATTTTACAATAAATAGTGAAGCCACAGATGTATTTATTGTAAAATTCAAAGCTTTGCCTACTGCCTCGGA	Pool_12
10912	GADD45G.106	TGCTGTTGACAGTGAGCGCCGCACTATGACTCTGGAAGAATAGTGAAGCCACAGATGTATTCTTCCAGAGTCATAGTGCGATGCCTACTGCCTCGGA	Pool_12
348654	GEN1.550	TGCTGTTGACAGTGAGCGACACATGTTGACTGTTACACAATAGTGAAGCCACAGATGTATTGTGTAACAGTCAACATGTGGTGCCTACTGCCTCGGA	Pool_12
348654	GEN1.3519	TGCTGTTGACAGTGAGCGACAGGATCACGTAGCTAACTAATAGTGAAGCCACAGATGTATTAGTTAGCTACGTGATCCTGGTGCCTACTGCCTCGGA	Pool_12
348654	GEN1.5265	TGCTGTTGACAGTGAGCGACAGGTATATACCCAAGATAAATAGTGAAGCCACAGATGTATTTATCTTGGGTATATACCTGGTGCCTACTGCCTCGGA	Pool_12
348654	GEN1.2214	TGCTGTTGACAGTGAGCGCTCCAGAGACTCTAAAATTCTATAGTGAAGCCACAGATGTATAGAATTTTAGAGTCTCTGGATTGCCTACTGCCTCGGA	Pool_12
348654	GEN1.5089	TGCTGTTGACAGTGAGCGCCACCCAATGTCTACAATCAAATAGTGAAGCCACAGATGTATTTGATTGTAGACATTGGGTGTTGCCTACTGCCTCGGA	Pool_12
348654	GEN1.258	TGCTGTTGACAGTGAGCGCAAGCTGAAAGCTGATGTCATATAGTGAAGCCACAGATGTATATGACATCAGCTTTCAGCTTTTGCCTACTGCCTCGGA	Pool_12
2965	GTF2H1.1039	TGCTGTTGACAGTGAGCGCACGGTCTAAGATATAATTTAATAGTGAAGCCACAGATGTATTAAATTATATCTTAGACCGTTTGCCTACTGCCTCGGA	Pool_12
2965	GTF2H1.3225	TGCTGTTGACAGTGAGCGCTGGGATCAACTTAATGTTTAATAGTGAAGCCACAGATGTATTAAACATTAAGTTGATCCCATTGCCTACTGCCTCGGA	Pool_12
2965	GTF2H1.1038	TGCTGTTGACAGTGAGCGCAACGGTCTAAGATATAATTTATAGTGAAGCCACAGATGTATAAATTATATCTTAGACCGTTATGCCTACTGCCTCGGA	Pool_12
2965	GTF2H1.2797	TGCTGTTGACAGTGAGCGCAACGATAAATATTGCACTGAATAGTGAAGCCACAGATGTATTCAGTGCAATATTTATCGTTTTGCCTACTGCCTCGGA	Pool_12
2965	GTF2H1.3180	TGCTGTTGACAGTGAGCGCAAAGATGTTCTTGTTTCTGAATAGTGAAGCCACAGATGTATTCAGAAACAAGAACATCTTTTTGCCTACTGCCTCGGA	Pool_12
2965	GTF2H1.1085	TGCTGTTGACAGTGAGCGCTAGGACCTATCCAGCAGTAAATAGTGAAGCCACAGATGTATTTACTGCTGGATAGGTCCTAATGCCTACTGCCTCGGA	Pool_12
2966	GTF2H2.1403	TGCTGTTGACAGTGAGCGACAGCATGTAGTATACATTGTATAGTGAAGCCACAGATGTATACAATGTATACTACATGCTGGTGCCTACTGCCTCGGA	Pool_12
2966	GTF2H2.170	TGCTGTTGACAGTGAGCGACAGAGGAAGATTATTGAATAATAGTGAAGCCACAGATGTATTATTCAATAATCTTCCTCTGCTGCCTACTGCCTCGGA	Pool_12
2966	GTF2H2.866	TGCTGTTGACAGTGAGCGATACCATGTTATTTTAGATGAATAGTGAAGCCACAGATGTATTCATCTAAAATAACATGGTACTGCCTACTGCCTCGGA	Pool_12
2966	GTF2H2.1784	TGCTGTTGACAGTGAGCGCTCAGTGTAAGATGAAAATTTATAGTGAAGCCACAGATGTATAAATTTTCATCTTACACTGAATGCCTACTGCCTCGGA	Pool_12
2966	GTF2H2.939	TGCTGTTGACAGTGAGCGCCAAGTTCTGAATGCTCACTTATAGTGAAGCCACAGATGTATAAGTGAGCATTCAGAACTTGATGCCTACTGCCTCGGA	Pool_12
2966	GTF2H2.172	TGCTGTTGACAGTGAGCGCGAGGAAGATTATTGAATAATATAGTGAAGCCACAGATGTATATTATTCAATAATCTTCCTCTTGCCTACTGCCTCGGA	Pool_12
8870	IER3.1193	TGCTGTTGACAGTGAGCGCTCGCCTAGTATGTTCTGTGAATAGTGAAGCCACAGATGTATTCACAGAACATACTAGGCGATTGCCTACTGCCTCGGA	Pool_12
8870	IER3.606	TGCTGTTGACAGTGAGCGACAACTTGAACTCAGAACACTATAGTGAAGCCACAGATGTATAGTGTTCTGAGTTCAAGTTGCTGCCTACTGCCTCGGA	Pool_12
8870	IER3.931	TGCTGTTGACAGTGAGCGATGCGGCAAAGTAGGAGAAGAATAGTGAAGCCACAGATGTATTCTTCTCCTACTTTGCCGCAGTGCCTACTGCCTCGGA	Pool_12
8870	IER3.1051	TGCTGTTGACAGTGAGCGCCCGTCTGTCTACTGTGTGAGATAGTGAAGCCACAGATGTATCTCACACAGTAGACAGACGGATGCCTACTGCCTCGGA	Pool_12
8870	IER3.933	TGCTGTTGACAGTGAGCGACGGCAAAGTAGGAGAAGAAATTAGTGAAGCCACAGATGTAATTTCTTCTCCTACTTTGCCGCTGCCTACTGCCTCGGA	Pool_12
8870	IER3.600	TGCTGTTGACAGTGAGCGCCCGAGGCAACTTGAACTCAGATAGTGAAGCCACAGATGTATCTGAGTTCAAGTTGCCTCGGATGCCTACTGCCTCGGA	Pool_12
3622	ING2.1042	TGCTGTTGACAGTGAGCGCTAGGGTAAATGCATAAGACTATAGTGAAGCCACAGATGTATAGTCTTATGCATTTACCCTAATGCCTACTGCCTCGGA	Pool_12
3622	ING2.561	TGCTGTTGACAGTGAGCGAAACCAGAAAGATCTTCAAGAATAGTGAAGCCACAGATGTATTCTTGAAGATCTTTCTGGTTGTGCCTACTGCCTCGGA	Pool_12
3622	ING2.392	TGCTGTTGACAGTGAGCGAAGAGCACTAATTAATAGTCAATAGTGAAGCCACAGATGTATTGACTATTAATTAGTGCTCTCTGCCTACTGCCTCGGA	Pool_12
3622	ING2.1101	TGCTGTTGACAGTGAGCGCAAAGTTGTTGTACTTTGAAAATAGTGAAGCCACAGATGTATTTTCAAAGTACAACAACTTTTTGCCTACTGCCTCGGA	Pool_12
3622	ING2.525	TGCTGTTGACAGTGAGCGAAACGAGCCTCAGATAAAGCAATAGTGAAGCCACAGATGTATTGCTTTATCTGAGGCTCGTTCTGCCTACTGCCTCGGA	Pool_12
3622	ING2.506	TGCTGTTGACAGTGAGCGACAAGATCCTGCTGAAAGTGAATAGTGAAGCCACAGATGTATTCACTTTCAGCAGGATCTTGGTGCCTACTGCCTCGGA	Pool_12
283899	INO80E.119	TGCTGTTGACAGTGAGCGAACGGCGAAGTGGACTACAAAATAGTGAAGCCACAGATGTATTTTGTAGTCCACTTCGCCGTCTGCCTACTGCCTCGGA	Pool_12
283899	INO80E.244	TGCTGTTGACAGTGAGCGACGGGACAAGAGTTTCCTCCTATAGTGAAGCCACAGATGTATAGGAGGAAACTCTTGTCCCGGTGCCTACTGCCTCGGA	Pool_12
283899	INO80E.118	TGCTGTTGACAGTGAGCGAGACGGCGAAGTGGACTACAAATAGTGAAGCCACAGATGTATTTGTAGTCCACTTCGCCGTCCTGCCTACTGCCTCGGA	Pool_12
283899	INO80E.162	TGCTGTTGACAGTGAGCGAGAAGCTCAAGTTCCTCATCTATAGTGAAGCCACAGATGTATAGATGAGGAACTTGAGCTTCCTGCCTACTGCCTCGGA	Pool_12
283899	INO80E.277	TGCTGTTGACAGTGAGCGACAGTACGAGAACGTGGATGAATAGTGAAGCCACAGATGTATTCATCCACGTTCTCGTACTGCTGCCTACTGCCTCGGA	Pool_12
283899	INO80E.1152	TGCTGTTGACAGTGAGCGCCAATGAAGTTTCTGTATTAAATAGTGAAGCCACAGATGTATTTAATACAGAAACTTCATTGATGCCTACTGCCTCGGA	Pool_12
65123	INTS3.1500	TGCTGTTGACAGTGAGCGACGGGTGCGATTTGGTCAACAATAGTGAAGCCACAGATGTATTGTTGACCAAATCGCACCCGGTGCCTACTGCCTCGGA	Pool_12
65123	INTS3.4114	TGCTGTTGACAGTGAGCGCCAGGTCTTGGTTTGTTCTGAATAGTGAAGCCACAGATGTATTCAGAACAAACCAAGACCTGATGCCTACTGCCTCGGA	Pool_12
65123	INTS3.4444	TGCTGTTGACAGTGAGCGCAAAGTTGTTTTTAAATGACAATAGTGAAGCCACAGATGTATTGTCATTTAAAAACAACTTTTTGCCTACTGCCTCGGA	Pool_12
65123	INTS3.2546	TGCTGTTGACAGTGAGCGACAGCTTCTCTCTACTTCTAGATAGTGAAGCCACAGATGTATCTAGAAGTAGAGAGAAGCTGCTGCCTACTGCCTCGGA	Pool_12
65123	INTS3.2781	TGCTGTTGACAGTGAGCGATACACAGAGTTTCCAGATGAATAGTGAAGCCACAGATGTATTCATCTGGAAACTCTGTGTAGTGCCTACTGCCTCGGA	Pool_12
65123	INTS3.2892	TGCTGTTGACAGTGAGCGCAACCTGGTTATGTTTCGAAAATAGTGAAGCCACAGATGTATTTTCGAAACATAACCAGGTTATGCCTACTGCCTCGGA	Pool_12
25896	INTS7.2321	TGCTGTTGACAGTGAGCGAAAGAATGATGTCTGTATATAATAGTGAAGCCACAGATGTATTATATACAGACATCATTCTTCTGCCTACTGCCTCGGA	Pool_12
25896	INTS7.1126	TGCTGTTGACAGTGAGCGACCCAAGAGTGCTGTTACCATATAGTGAAGCCACAGATGTATATGGTAACAGCACTCTTGGGCTGCCTACTGCCTCGGA	Pool_12
25896	INTS7.650	TGCTGTTGACAGTGAGCGAACCAGTAGACTTGAAGCTAAATAGTGAAGCCACAGATGTATTTAGCTTCAAGTCTACTGGTGTGCCTACTGCCTCGGA	Pool_12
25896	INTS7.2318	TGCTGTTGACAGTGAGCGCAAGAAGAATGATGTCTGTATATAGTGAAGCCACAGATGTATATACAGACATCATTCTTCTTTTGCCTACTGCCTCGGA	Pool_12
25896	INTS7.4096	TGCTGTTGACAGTGAGCGCTAGCACAGTATGGTAGATATATAGTGAAGCCACAGATGTATATATCTACCATACTGTGCTAATGCCTACTGCCTCGGA	Pool_12
25896	INTS7.649	TGCTGTTGACAGTGAGCGCCACCAGTAGACTTGAAGCTAATAGTGAAGCCACAGATGTATTAGCTTCAAGTCTACTGGTGTTGCCTACTGCCTCGGA	Pool_12
3661	IRF3.168	TGCTGTTGACAGTGAGCGACAGCCTCGAGTTTGAGAGCTATAGTGAAGCCACAGATGTATAGCTCTCAAACTCGAGGCTGCTGCCTACTGCCTCGGA	Pool_12
3661	IRF3.88	TGCTGTTGACAGTGAGCGCAAAGTTGGTTTTATTTCAAGATAGTGAAGCCACAGATGTATCTTGAAATAAAACCAACTTTATGCCTACTGCCTCGGA	Pool_12
3661	IRF3.89	TGCTGTTGACAGTGAGCGCAAGTTGGTTTTATTTCAAGAATAGTGAAGCCACAGATGTATTCTTGAAATAAAACCAACTTTTGCCTACTGCCTCGGA	Pool_12
3661	IRF3.79	TGCTGTTGACAGTGAGCGCAAGAATGATAAAGTTGGTTTTTAGTGAAGCCACAGATGTAAAAACCAACTTTATCATTCTTTTGCCTACTGCCTCGGA	Pool_12
3661	IRF3.64	TGCTGTTGACAGTGAGCGCTGGGTCTGTTACCCAAAGAATTAGTGAAGCCACAGATGTAATTCTTTGGGTAACAGACCCAATGCCTACTGCCTCGGA	Pool_12
3661	IRF3.324	TGCTGTTGACAGTGAGCGAGAAGACATTCTGGATGAGTTATAGTGAAGCCACAGATGTATAACTCATCCAGAATGTCTTCCTGCCTACTGCCTCGGA	Pool_12
3980	LIG3.2407	TGCTGTTGACAGTGAGCGACAGCTGGTTGAAGGTCAACAATAGTGAAGCCACAGATGTATTGTTGACCTTCAACCAGCTGGTGCCTACTGCCTCGGA	Pool_12
3980	LIG3.2011	TGCTGTTGACAGTGAGCGCCCGGATCATGTTCTCAGAAATTAGTGAAGCCACAGATGTAATTTCTGAGAACATGATCCGGTTGCCTACTGCCTCGGA	Pool_12
3980	LIG3.1636	TGCTGTTGACAGTGAGCGCTGGCATGTTCTCTGAGATCAATAGTGAAGCCACAGATGTATTGATCTCAGAGAACATGCCATTGCCTACTGCCTCGGA	Pool_12
3980	LIG3.2404	TGCTGTTGACAGTGAGCGCACCCAGCTGGTTGAAGGTCAATAGTGAAGCCACAGATGTATTGACCTTCAACCAGCTGGGTATGCCTACTGCCTCGGA	Pool_12
3980	LIG3.215	TGCTGTTGACAGTGAGCGCCACTGGCGTGATGTAAGACAATAGTGAAGCCACAGATGTATTGTCTTACATCACGCCAGTGATGCCTACTGCCTCGGA	Pool_12
3980	LIG3.752	TGCTGTTGACAGTGAGCGACAGGTGACTTCTCCAGTGAAATAGTGAAGCCACAGATGTATTTCACTGGAGAAGTCACCTGGTGCCTACTGCCTCGGA	Pool_12
10459	MAD2L2.907	TGCTGTTGACAGTGAGCGATGCTGTGAGTTGTTTCAATAATAGTGAAGCCACAGATGTATTATTGAAACAACTCACAGCACTGCCTACTGCCTCGGA	Pool_12
10459	MAD2L2.883	TGCTGTTGACAGTGAGCGACAACACTGTCTGTCTCAAATATAGTGAAGCCACAGATGTATATTTGAGACAGACAGTGTTGGTGCCTACTGCCTCGGA	Pool_12
10459	MAD2L2.611	TGCTGTTGACAGTGAGCGCAAGATGCAGCTTTACGTGGAATAGTGAAGCCACAGATGTATTCCACGTAAAGCTGCATCTTTTGCCTACTGCCTCGGA	Pool_12
10459	MAD2L2.245	TGCTGTTGACAGTGAGCGAGAGAAGAATGATGTGGAGAAATAGTGAAGCCACAGATGTATTTCTCCACATCATTCTTCTCCTGCCTACTGCCTCGGA	Pool_12
10459	MAD2L2.908	TGCTGTTGACAGTGAGCGCGCTGTGAGTTGTTTCAATAAATAGTGAAGCCACAGATGTATTTATTGAAACAACTCACAGCATGCCTACTGCCTCGGA	Pool_12
10459	MAD2L2.490	TGCTGTTGACAGTGAGCGATCGCAACATGGAGAAGATCCATAGTGAAGCCACAGATGTATGGATCTTCTCCATGTTGCGAGTGCCTACTGCCTCGGA	Pool_12
1432	MAPK14.692	TGCTGTTGACAGTGAGCGCCAGAGAACTGCGGTTACTTAATAGTGAAGCCACAGATGTATTAAGTAACCGCAGTTCTCTGTTGCCTACTGCCTCGGA	Pool_12
1432	MAPK14.1005	TGCTGTTGACAGTGAGCGACACACAGATGATGAAATGACATAGTGAAGCCACAGATGTATGTCATTTCATCATCTGTGTGCTGCCTACTGCCTCGGA	Pool_12
1432	MAPK14.764	TGCTGTTGACAGTGAGCGAAAGGTCTCTGGAGGAATTCAATAGTGAAGCCACAGATGTATTGAATTCCTCCAGAGACCTTGTGCCTACTGCCTCGGA	Pool_12
1432	MAPK14.1089	TGCTGTTGACAGTGAGCGACAGACAGTTGATATTTGGTCATAGTGAAGCCACAGATGTATGACCAAATATCAACTGTCTGGTGCCTACTGCCTCGGA	Pool_12
1432	MAPK14.663	TGCTGTTGACAGTGAGCGCCAGTCCATCATTCATGCGAAATAGTGAAGCCACAGATGTATTTCGCATGAATGATGGACTGATGCCTACTGCCTCGGA	Pool_12
1432	MAPK14.941	TGCTGTTGACAGTGAGCGCACCTAGTAATCTAGCTGTGAATAGTGAAGCCACAGATGTATTCACAGCTAGATTACTAGGTTTGCCTACTGCCTCGGA	Pool_12
9261	MAPKAPK2.1394	TGCTGTTGACAGTGAGCGATACGAGCAGATCAAGATAAAATAGTGAAGCCACAGATGTATTTTATCTTGATCTGCTCGTAGTGCCTACTGCCTCGGA	Pool_12
9261	MAPKAPK2.3027	TGCTGTTGACAGTGAGCGAAGCGAAATTGTCTTTACTAAATAGTGAAGCCACAGATGTATTTAGTAAAGACAATTTCGCTCTGCCTACTGCCTCGGA	Pool_12
9261	MAPKAPK2.2991	TGCTGTTGACAGTGAGCGCCCAGCACTCGATTGTTGTAAATAGTGAAGCCACAGATGTATTTACAACAATCGAGTGCTGGATGCCTACTGCCTCGGA	Pool_12
9261	MAPKAPK2.756	TGCTGTTGACAGTGAGCGACAGGCATTCACAGAAAGAGAATAGTGAAGCCACAGATGTATTCTCTTTCTGTGAATGCCTGGTGCCTACTGCCTCGGA	Pool_12
9261	MAPKAPK2.766	TGCTGTTGACAGTGAGCGCCAGAAAGAGAAGCATCCGAAATAGTGAAGCCACAGATGTATTTCGGATGCTTCTCTTTCTGTTGCCTACTGCCTCGGA	Pool_12
9261	MAPKAPK2.440	TGCTGTTGACAGTGAGCGACGGCCTGCAGATCAAGAAGAATAGTGAAGCCACAGATGTATTCTTCTTGATCTGCAGGCCGGTGCCTACTGCCTCGGA	Pool_12
84930	MASTL.1203	TGCTGTTGACAGTGAGCGCAACCTAGACAAGATTATTCAATAGTGAAGCCACAGATGTATTGAATAATCTTGTCTAGGTTTTGCCTACTGCCTCGGA	Pool_12
84930	MASTL.1230	TGCTGTTGACAGTGAGCGACAGGACAAGTGTTATCGCTTATAGTGAAGCCACAGATGTATAAGCGATAACACTTGTCCTGGTGCCTACTGCCTCGGA	Pool_12
84930	MASTL.1360	TGCTGTTGACAGTGAGCGACCCTATGTCTGTAGATCAAAATAGTGAAGCCACAGATGTATTTTGATCTACAGACATAGGGCTGCCTACTGCCTCGGA	Pool_12
84930	MASTL.1358	TGCTGTTGACAGTGAGCGCTGCCCTATGTCTGTAGATCAATAGTGAAGCCACAGATGTATTGATCTACAGACATAGGGCATTGCCTACTGCCTCGGA	Pool_12
84930	MASTL.1457	TGCTGTTGACAGTGAGCGAAAGTGTCTAACTTCTAATTTATAGTGAAGCCACAGATGTATAAATTAGAAGTTAGACACTTCTGCCTACTGCCTCGGA	Pool_12
84930	MASTL.1388	TGCTGTTGACAGTGAGCGCACGCCTTATTCTAGCAAATTATAGTGAAGCCACAGATGTATAATTTGCTAGAATAAGGCGTATGCCTACTGCCTCGGA	Pool_12
84515	MCM8.3408	TGCTGTTGACAGTGAGCGATAGCCATGTGTTAATTGTTAATAGTGAAGCCACAGATGTATTAACAATTAACACATGGCTACTGCCTACTGCCTCGGA	Pool_12
84515	MCM8.1295	TGCTGTTGACAGTGAGCGACAGGTCGGATTCCACGAACAATAGTGAAGCCACAGATGTATTGTTCGTGGAATCCGACCTGCTGCCTACTGCCTCGGA	Pool_12
84515	MCM8.3638	TGCTGTTGACAGTGAGCGCTCCCATGTCAAGAATACAAAATAGTGAAGCCACAGATGTATTTTGTATTCTTGACATGGGAATGCCTACTGCCTCGGA	Pool_12
84515	MCM8.3412	TGCTGTTGACAGTGAGCGACATGTGTTAATTGTTAAATAATAGTGAAGCCACAGATGTATTATTTAACAATTAACACATGGTGCCTACTGCCTCGGA	Pool_12
84515	MCM8.2842	TGCTGTTGACAGTGAGCGCTACCAGCTTCAAACTATGTAATAGTGAAGCCACAGATGTATTACATAGTTTGAAGCTGGTAATGCCTACTGCCTCGGA	Pool_12
84515	MCM8.1000	TGCTGTTGACAGTGAGCGCCAGCTCAAGAATGTCAGAGCATAGTGAAGCCACAGATGTATGCTCTGACATTCTTGAGCTGTTGCCTACTGCCTCGGA	Pool_12
10445	MCRS1.143	TGCTGTTGACAGTGAGCGACAGGTTCATCAAGAGGAAGAATAGTGAAGCCACAGATGTATTCTTCCTCTTGATGAACCTGGTGCCTACTGCCTCGGA	Pool_12
10445	MCRS1.345	TGCTGTTGACAGTGAGCGAAAGCGTGTGAAGAAGAGTAAATAGTGAAGCCACAGATGTATTTACTCTTCTTCACACGCTTGTGCCTACTGCCTCGGA	Pool_12
10445	MCRS1.134	TGCTGTTGACAGTGAGCGAAAGCTCCTCCAGGTTCATCAATAGTGAAGCCACAGATGTATTGATGAACCTGGAGGAGCTTCTGCCTACTGCCTCGGA	Pool_12
10445	MCRS1.1667	TGCTGTTGACAGTGAGCGCTAGCCTCAGACTCTTCTTTTATAGTGAAGCCACAGATGTATAAAAGAAGAGTCTGAGGCTAATGCCTACTGCCTCGGA	Pool_12
10445	MCRS1.1160	TGCTGTTGACAGTGAGCGACCGGAAACAAGGTGTCATCAATAGTGAAGCCACAGATGTATTGATGACACCTTGTTTCCGGGTGCCTACTGCCTCGGA	Pool_12
10445	MCRS1.344	TGCTGTTGACAGTGAGCGACAAGCGTGTGAAGAAGAGTAATAGTGAAGCCACAGATGTATTACTCTTCTTCACACGCTTGGTGCCTACTGCCTCGGA	Pool_12
9656	MDC1.5940	TGCTGTTGACAGTGAGCGACCAGAAGACAGTGATTATCAATAGTGAAGCCACAGATGTATTGATAATCACTGTCTTCTGGGTGCCTACTGCCTCGGA	Pool_12
9656	MDC1.5819	TGCTGTTGACAGTGAGCGACAGCAGGTAGATCTAGGTTCATAGTGAAGCCACAGATGTATGAACCTAGATCTACCTGCTGGTGCCTACTGCCTCGGA	Pool_12
9656	MDC1.1558	TGCTGTTGACAGTGAGCGACAGGCTGGTAGTGATACAGATTAGTGAAGCCACAGATGTAATCTGTATCACTACCAGCCTGGTGCCTACTGCCTCGGA	Pool_12
9656	MDC1.3228	TGCTGTTGACAGTGAGCGCTCCAGCCGAGTTAGAAGAGAATAGTGAAGCCACAGATGTATTCTCTTCTAACTCGGCTGGATTGCCTACTGCCTCGGA	Pool_12
9656	MDC1.1180	TGCTGTTGACAGTGAGCGACAGTCTGAAGCTGAAGTTGTATAGTGAAGCCACAGATGTATACAACTTCAGCTTCAGACTGCTGCCTACTGCCTCGGA	Pool_12
9656	MDC1.3049	TGCTGTTGACAGTGAGCGACAGAGACAAGAATCTGACAAATAGTGAAGCCACAGATGTATTTGTCAGATTCTTGTCTCTGGTGCCTACTGCCTCGGA	Pool_12
4193	MDM2.618	TGCTGTTGACAGTGAGCGCCAGGAACTTGGTAGTAGTCAATAGTGAAGCCACAGATGTATTGACTACTACCAAGTTCCTGTTGCCTACTGCCTCGGA	Pool_12
4193	MDM2.1457	TGCTGTTGACAGTGAGCGAAAGCTTCACAATCACAAGAAATAGTGAAGCCACAGATGTATTTCTTGTGATTGTGAAGCTTGTGCCTACTGCCTCGGA	Pool_12
4193	MDM2.7294	TGCTGTTGACAGTGAGCGAAAGGTGTTCAGAAGTAACAAATAGTGAAGCCACAGATGTATTTGTTACTTCTGAACACCTTCTGCCTACTGCCTCGGA	Pool_12
4193	MDM2.970	TGCTGTTGACAGTGAGCGCCCGGATCTTGATGCTGGTGTATAGTGAAGCCACAGATGTATACACCAGCATCAAGATCCGGATGCCTACTGCCTCGGA	Pool_12
4193	MDM2.3926	TGCTGTTGACAGTGAGCGACAAGGTGTTCAGATTGTATAATAGTGAAGCCACAGATGTATTATACAATCTGAACACCTTGCTGCCTACTGCCTCGGA	Pool_12
4193	MDM2.2735	TGCTGTTGACAGTGAGCGACAGCCAAGAATTAGTATTTAATAGTGAAGCCACAGATGTATTAAATACTAATTCTTGGCTGGTGCCTACTGCCTCGGA	Pool_12
4194	MDM4.5207	TGCTGTTGACAGTGAGCGCAAGGAAGACAATTGTTAACTATAGTGAAGCCACAGATGTATAGTTAACAATTGTCTTCCTTTTGCCTACTGCCTCGGA	Pool_12
4194	MDM4.5211	TGCTGTTGACAGTGAGCGAAAGACAATTGTTAACTAGATATAGTGAAGCCACAGATGTATATCTAGTTAACAATTGTCTTCTGCCTACTGCCTCGGA	Pool_12
4194	MDM4.2689	TGCTGTTGACAGTGAGCGACCCTAGAATTGTCAAACTTAATAGTGAAGCCACAGATGTATTAAGTTTGACAATTCTAGGGCTGCCTACTGCCTCGGA	Pool_12
4194	MDM4.5064	TGCTGTTGACAGTGAGCGCAAGGGTCAAGGTCATTTGTAATAGTGAAGCCACAGATGTATTACAAATGACCTTGACCCTTATGCCTACTGCCTCGGA	Pool_12
4194	MDM4.784	TGCTGTTGACAGTGAGCGCTCCAAGGTAGCTGTAAGAAAATAGTGAAGCCACAGATGTATTTTCTTACAGCTACCTTGGATTGCCTACTGCCTCGGA	Pool_12
4194	MDM4.3243	TGCTGTTGACAGTGAGCGCTAGCGAAACTGTCTCAGAAAATAGTGAAGCCACAGATGTATTTTCTGAGACAGTTTCGCTATTGCCTACTGCCTCGGA	Pool_12
4350	MPG.454	TGCTGTTGACAGTGAGCGCCGGCATGTACTTCTGCATGAATAGTGAAGCCACAGATGTATTCATGCAGAAGTACATGCCGTTGCCTACTGCCTCGGA	Pool_12
4350	MPG.180	TGCTGTTGACAGTGAGCGCACCGCAGCATCTATTTCTCAATAGTGAAGCCACAGATGTATTGAGAAATAGATGCTGCGGTATGCCTACTGCCTCGGA	Pool_12
4350	MPG.403	TGCTGTTGACAGTGAGCGACAACCGAGGCATGTTCATGAATAGTGAAGCCACAGATGTATTCATGAACATGCCTCGGTTGCTGCCTACTGCCTCGGA	Pool_12
4350	MPG.453	TGCTGTTGACAGTGAGCGCACGGCATGTACTTCTGCATGATAGTGAAGCCACAGATGTATCATGCAGAAGTACATGCCGTATGCCTACTGCCTCGGA	Pool_12
4350	MPG.433	TGCTGTTGACAGTGAGCGACCTGTACGTGTACATCATTTATAGTGAAGCCACAGATGTATAAATGATGTACACGTACAGGGTGCCTACTGCCTCGGA	Pool_12
4350	MPG.906	TGCTGTTGACAGTGAGCGCAACCGAATAAATGTTTTATTTTAGTGAAGCCACAGATGTAAAATAAAACATTTATTCGGTTTTGCCTACTGCCTCGGA	Pool_12
64963	MRPS11.465	TGCTGTTGACAGTGAGCGACAGGTAGTCTCTGCTAGTAATTAGTGAAGCCACAGATGTAATTACTAGCAGAGACTACCTGGTGCCTACTGCCTCGGA	Pool_12
64963	MRPS11.1124	TGCTGTTGACAGTGAGCGATCAGATGAAAGTAAAATATAATAGTGAAGCCACAGATGTATTATATTTTACTTTCATCTGAGTGCCTACTGCCTCGGA	Pool_12
64963	MRPS11.577	TGCTGTTGACAGTGAGCGACAGCGGCGAGAGCTAAACAAATAGTGAAGCCACAGATGTATTTGTTTAGCTCTCGCCGCTGCTGCCTACTGCCTCGGA	Pool_12
64963	MRPS11.1204	TGCTGTTGACAGTGAGCGCCCCAAGATTTCTAGAGCTAATTAGTGAAGCCACAGATGTAATTAGCTCTAGAAATCTTGGGTTGCCTACTGCCTCGGA	Pool_12
64963	MRPS11.404	TGCTGTTGACAGTGAGCGACAAGCAGAAAGTTGAACAGAATAGTGAAGCCACAGATGTATTCTGTTCAACTTTCTGCTTGGTGCCTACTGCCTCGGA	Pool_12
64963	MRPS11.1202	TGCTGTTGACAGTGAGCGCTACCCAAGATTTCTAGAGCTATAGTGAAGCCACAGATGTATAGCTCTAGAAATCTTGGGTAATGCCTACTGCCTCGGA	Pool_12
4437	MSH3.2782	TGCTGTTGACAGTGAGCGAAAGGAGATTACTGCAGACCAATAGTGAAGCCACAGATGTATTGGTCTGCAGTAATCTCCTTGTGCCTACTGCCTCGGA	Pool_12
4437	MSH3.1116	TGCTGTTGACAGTGAGCGCCACAGACTGTTTGTTCATGTATAGTGAAGCCACAGATGTATACATGAACAAACAGTCTGTGATGCCTACTGCCTCGGA	Pool_12
4437	MSH3.1899	TGCTGTTGACAGTGAGCGCCAGAATCAGACTGATATGAAATAGTGAAGCCACAGATGTATTTCATATCAGTCTGATTCTGTTGCCTACTGCCTCGGA	Pool_12
4437	MSH3.2502	TGCTGTTGACAGTGAGCGCCAGGAGTTTATGATAGAAATATAGTGAAGCCACAGATGTATATTTCTATCATAAACTCCTGTTGCCTACTGCCTCGGA	Pool_12
4437	MSH3.3288	TGCTGTTGACAGTGAGCGCCCGCCAGTTTGTGAACTAGAATAGTGAAGCCACAGATGTATTCTAGTTCACAAACTGGCGGATGCCTACTGCCTCGGA	Pool_12
4437	MSH3.2394	TGCTGTTGACAGTGAGCGCAAGAGGAAGGATGAAATTCAATAGTGAAGCCACAGATGTATTGAATTTCATCCTTCCTCTTTTGCCTACTGCCTCGGA	Pool_12
4582	MUC1.376	TGCTGTTGACAGTGAGCGACAGCAGCCTCTCTTACACAAATAGTGAAGCCACAGATGTATTTGTGTAAGAGAGGCTGCTGCTGCCTACTGCCTCGGA	Pool_12
4582	MUC1.349	TGCTGTTGACAGTGAGCGCTGAGAAGGTTTCTGCAGGTAATAGTGAAGCCACAGATGTATTACCTGCAGAAACCTTCTCATTGCCTACTGCCTCGGA	Pool_12
4582	MUC1.178	TGCTGTTGACAGTGAGCGCGCCCAGCTCTACTGAGAAGAATAGTGAAGCCACAGATGTATTCTTCTCAGTAGAGCTGGGCATGCCTACTGCCTCGGA	Pool_12
4582	MUC1.350	TGCTGTTGACAGTGAGCGCGAGAAGGTTTCTGCAGGTAATTAGTGAAGCCACAGATGTAATTACCTGCAGAAACCTTCTCATGCCTACTGCCTCGGA	Pool_12
4582	MUC1.179	TGCTGTTGACAGTGAGCGACCCAGCTCTACTGAGAAGAATTAGTGAAGCCACAGATGTAATTCTTCTCAGTAGAGCTGGGCTGCCTACTGCCTCGGA	Pool_12
4582	MUC1.409	TGCTGTTGACAGTGAGCGAAGCCACTTCTGCCAACTTGTATAGTGAAGCCACAGATGTATACAAGTTGGCAGAAGTGGCTGTGCCTACTGCCTCGGA	Pool_12
84939	MUM1.3293	TGCTGTTGACAGTGAGCGACAGGGTCAGACGTGCTGTTAATAGTGAAGCCACAGATGTATTAACAGCACGTCTGACCCTGCTGCCTACTGCCTCGGA	Pool_12
84939	MUM1.1504	TGCTGTTGACAGTGAGCGACACTTTGATTGTAAAGAGAAATAGTGAAGCCACAGATGTATTTCTCTTTACAATCAAAGTGCTGCCTACTGCCTCGGA	Pool_12
84939	MUM1.3541	TGCTGTTGACAGTGAGCGCTCGGAACACGATTGTCTCAGATAGTGAAGCCACAGATGTATCTGAGACAATCGTGTTCCGATTGCCTACTGCCTCGGA	Pool_12
84939	MUM1.1481	TGCTGTTGACAGTGAGCGCCAGTGTCTCTTAAAAGTTTAATAGTGAAGCCACAGATGTATTAAACTTTTAAGAGACACTGTTGCCTACTGCCTCGGA	Pool_12
84939	MUM1.596	TGCTGTTGACAGTGAGCGCCAAGTTCGTTCACTTGTGAAATAGTGAAGCCACAGATGTATTTCACAAGTGAACGAACTTGATGCCTACTGCCTCGGA	Pool_12
84939	MUM1.624	TGCTGTTGACAGTGAGCGACGAGTGCAAAGTGGACCACAATAGTGAAGCCACAGATGTATTGTGGTCCACTTTGCACTCGGTGCCTACTGCCTCGGA	Pool_12
4646	MYO6.5316	TGCTGTTGACAGTGAGCGCAAGGAGTTTTGTTGTATTTTATAGTGAAGCCACAGATGTATAAAATACAACAAAACTCCTTATGCCTACTGCCTCGGA	Pool_12
4646	MYO6.4289	TGCTGTTGACAGTGAGCGCAAGGTTAATTATGGTAGCAAATAGTGAAGCCACAGATGTATTTGCTACCATAATTAACCTTATGCCTACTGCCTCGGA	Pool_12
4646	MYO6.979	TGCTGTTGACAGTGAGCGATAGGATCTGTGTTCAAGGCAATAGTGAAGCCACAGATGTATTGCCTTGAACACAGATCCTAGTGCCTACTGCCTCGGA	Pool_12
4646	MYO6.4854	TGCTGTTGACAGTGAGCGCAAGGAAATTCAGATTGTTTAATAGTGAAGCCACAGATGTATTAAACAATCTGAATTTCCTTTTGCCTACTGCCTCGGA	Pool_12
4646	MYO6.2159	TGCTGTTGACAGTGAGCGCAACAACAAAGATACTAAACAATAGTGAAGCCACAGATGTATTGTTTAGTATCTTTGTTGTTATGCCTACTGCCTCGGA	Pool_12
4646	MYO6.5906	TGCTGTTGACAGTGAGCGCTAGGCACTAGATGGAAAATTATAGTGAAGCCACAGATGTATAATTTTCCATCTAGTGCCTATTGCCTACTGCCTCGGA	Pool_12
79035	OBFC2B.361	TGCTGTTGACAGTGAGCGCAAGGTTGTCTGACACTATATATAGTGAAGCCACAGATGTATATATAGTGTCAGACAACCTTTTGCCTACTGCCTCGGA	Pool_12
79035	OBFC2B.359	TGCTGTTGACAGTGAGCGCCAAAGGTTGTCTGACACTATATAGTGAAGCCACAGATGTATATAGTGTCAGACAACCTTTGATGCCTACTGCCTCGGA	Pool_12
79035	OBFC2B.1264	TGCTGTTGACAGTGAGCGCAAGAGCGAAACTCCATCTCAATAGTGAAGCCACAGATGTATTGAGATGGAGTTTCGCTCTTATGCCTACTGCCTCGGA	Pool_12
79035	OBFC2B.203	TGCTGTTGACAGTGAGCGAAGGCCGAGTGACCAAGACAAATAGTGAAGCCACAGATGTATTTGTCTTGGTCACTCGGCCTGTGCCTACTGCCTCGGA	Pool_12
79035	OBFC2B.714	TGCTGTTGACAGTGAGCGAAACCCTGTTAGTAACGGCAAATAGTGAAGCCACAGATGTATTTGCCGTTACTAACAGGGTTGTGCCTACTGCCTCGGA	Pool_12
79035	OBFC2B.1369	TGCTGTTGACAGTGAGCGAAAGTCTCTCCTTCCTAATAAATAGTGAAGCCACAGATGTATTTATTAGGAAGGAGAGACTTCTGCCTACTGCCTCGGA	Pool_12
56160	NDNL2.409	TGCTGTTGACAGTGAGCGCCCAGAAGAAGATTCCGATCAATAGTGAAGCCACAGATGTATTGATCGGAATCTTCTTCTGGTTGCCTACTGCCTCGGA	Pool_12
56160	NDNL2.883	TGCTGTTGACAGTGAGCGACAGCAAGATGAAAGTTCTTAATAGTGAAGCCACAGATGTATTAAGAACTTTCATCTTGCTGGTGCCTACTGCCTCGGA	Pool_12
56160	NDNL2.1150	TGCTGTTGACAGTGAGCGCTAGGATGTGTTTGCAAAGTTTTAGTGAAGCCACAGATGTAAAACTTTGCAAACACATCCTAATGCCTACTGCCTCGGA	Pool_12
56160	NDNL2.1623	TGCTGTTGACAGTGAGCGATACTGTAGTTATTACAATAAATAGTGAAGCCACAGATGTATTTATTGTAATAACTACAGTAGTGCCTACTGCCTCGGA	Pool_12
56160	NDNL2.100	TGCTGTTGACAGTGAGCGACGCCGGAGACATGTTGCAAAATAGTGAAGCCACAGATGTATTTTGCAACATGTCTCCGGCGGTGCCTACTGCCTCGGA	Pool_12
56160	NDNL2.1200	TGCTGTTGACAGTGAGCGACAGATTTTCATCTATAAACAATAGTGAAGCCACAGATGTATTGTTTATAGATGAAAATCTGGTGCCTACTGCCTCGGA	Pool_12
4773	NFATC2.2515	TGCTGTTGACAGTGAGCGACCGGTCAGTGACCAAAAGGAATAGTGAAGCCACAGATGTATTCCTTTTGGTCACTGACCGGGTGCCTACTGCCTCGGA	Pool_12
4773	NFATC2.2460	TGCTGTTGACAGTGAGCGACACAGTCATTCAGCAGCAGAATAGTGAAGCCACAGATGTATTCTGCTGCTGAATGACTGTGGTGCCTACTGCCTCGGA	Pool_12
4773	NFATC2.1833	TGCTGTTGACAGTGAGCGAACCTGTAAAAGTGAACTTCTATAGTGAAGCCACAGATGTATAGAAGTTCACTTTTACAGGTGTGCCTACTGCCTCGGA	Pool_12
4773	NFATC2.58	TGCTGTTGACAGTGAGCGACCCGATGATGTCCTGGACTATTAGTGAAGCCACAGATGTAATAGTCCAGGACATCATCGGGGTGCCTACTGCCTCGGA	Pool_12
4773	NFATC2.1207	TGCTGTTGACAGTGAGCGCCAGCTCCATGGCTACATGGAATAGTGAAGCCACAGATGTATTCCATGTAGCCATGGAGCTGATGCCTACTGCCTCGGA	Pool_12
4773	NFATC2.1691	TGCTGTTGACAGTGAGCGCCCGAGTCCAAAGTTGTGTTTATAGTGAAGCCACAGATGTATAAACACAACTTTGGACTCGGATGCCTACTGCCTCGGA	Pool_12
4798	NFRKB.4337	TGCTGTTGACAGTGAGCGCTAGGAGTTTTGTGTCCAGAAATAGTGAAGCCACAGATGTATTTCTGGACACAAAACTCCTATTGCCTACTGCCTCGGA	Pool_12
4798	NFRKB.980	TGCTGTTGACAGTGAGCGCAAAGAAGAAGAAGAAAATAAATAGTGAAGCCACAGATGTATTTATTTTCTTCTTCTTCTTTTTGCCTACTGCCTCGGA	Pool_12
4798	NFRKB.981	TGCTGTTGACAGTGAGCGCAAGAAGAAGAAGAAAATAAAATAGTGAAGCCACAGATGTATTTTATTTTCTTCTTCTTCTTTTGCCTACTGCCTCGGA	Pool_12
4798	NFRKB.3873	TGCTGTTGACAGTGAGCGATCCACTGTTGTTGTGACTACATAGTGAAGCCACAGATGTATGTAGTCACAACAACAGTGGAGTGCCTACTGCCTCGGA	Pool_12
4798	NFRKB.4158	TGCTGTTGACAGTGAGCGATAGGAGAATATTCTGTTGAAATAGTGAAGCCACAGATGTATTTCAACAGAATATTCTCCTAGTGCCTACTGCCTCGGA	Pool_12
4798	NFRKB.1419	TGCTGTTGACAGTGAGCGCTCCCAAGATAATGAAAAGGAATAGTGAAGCCACAGATGTATTCCTTTTCATTATCTTGGGATTGCCTACTGCCTCGGA	Pool_12
286053	NSMCE2.467	TGCTGTTGACAGTGAGCGCAAGGCTGTTCAATCTACAATATAGTGAAGCCACAGATGTATATTGTAGATTGAACAGCCTTTTGCCTACTGCCTCGGA	Pool_12
[truncated: 1,792 more rows]
