# Supplementary material for: Dianhydrogalactitol Overcomes Multiple Temozolomide Resistance Mechanisms in Glioblastoma
Source: Oxford University Press journal article supplement (doi:10.1158/1535-7163.mct-20-0319), 2021-04-12
Supplement: 15357163mct200319-sup-241905_3_supp_6926798_q999qz.xlsx [file 15357163mct200319-sup-241905_3_supp_6926798_q999qz.xlsx]

## Sheet: Tble_S4
# Supplementary Table IV. shRNA screening results for the U-251 treated with Val-083
Column name	Description
Symbol	Gene Symbol
sScore	Sensitizer score
RiScore	RNAi score
Gene.NoHairpins_Below10Percentile	Number of hairpins for the same gene below the 10th percentile
Gene.NoHairpins_Above90Percentile	Number of hairpins for the same gene above the 90th percentile
hairpinID	Hairpin identification number
pool	Library pool
E123_avgLog2FC	Average log2 fold change (TMZ/DMSO) of three independent experiments
E1_log2FC	log2 fold change (TMZ/DMSO) of experiment # 1
E2_log2FC	log2 fold change (TMZ/DMSO) of experiment # 2
E3_log2FC	log2 fold change (TMZ/DMSO) of experiment # 3
DMSO_avg_CPM	Average count per millions for the DMSO condition
TMZ_avgCPM	Average count per millions for the TMZ condition
Name	Gene Name
Symbol	sScore	RiScore	Gene.NoHairpins_Below1Percentile	Gene.NoHairpins_Above99Percentile	hairpinID	pool	E123_avgLog2FC	E1_log2FC	E2_log2FC	E3_log2FC	DMSO_avg_CPM	VAL_avgCPM	Name
RUVBL2	-0.0803467	0.628563	0	3	RUVBL2_1100	pool12	7.27155	8.8491	6.68877	6.27678	1.53796	350.622	RuvB-like AAA ATPase 2
PPP4C	0	1.1831	1	2	PPP4C_834	pool11	7.12648	8.20884	6.41099	6.75962	6.2364	906.151	protein phosphatase 4 catalytic subunit
NPM1	-0.00217692	1.67572	0	3	NPM1_409	pool11	7.12075	9.30282	6.63192	5.42749	10.5342	1234.85	nucleophosmin (nucleolar phosphoprotein B23, numatrin)
KIF22	-0.106571	1.62525	1	3	KIF22_1177	pool11	6.98532	8.36685	5.0589	7.53022	3.19497	570.427	kinesin family member 22
KIAA0101	-0.143332	0.329569	1	2	KIAA0101_23	pool11	6.9688	8.01698	6.23349	6.65593	5.40981	679.189	KIAA0101
FOXN3	-0.484789	0.0654006	2	1	FOXN3_6055	pool12	6.93617	7.43357	6.60867	6.76627	4.07921	575.402	forkhead box N3
PSMA2	-0.153725	1.51004	0	3	PSMA2_774	pool11	6.92729	7.55693	6.23877	6.98616	11.0352	1325.19	proteasome subunit alpha 2
RFC5	-0.044649	0.784362	0	1	RFC5_1516	pool11	6.9185	7.74971	6.12524	6.88054	18.816	2082.26	replication factor C subunit 5
PSMC4	-0.0332015	1.82974	0	3	PSMC4_989	pool11	6.89166	8.33473	5.37365	6.96661	6.8968	913.543	proteasome 26S subunit, ATPase 4
NPM1	-0.00217692	1.67572	0	3	NPM1_104	pool11	6.85822	8.28014	5.96053	6.33401	1.37872	276.513	nucleophosmin (nucleolar phosphoprotein B23, numatrin)
POLR2H	-0.022185	1.25806	0	4	POLR2H_347	pool11	6.79533	8.66829	5.73892	5.97877	10.4276	974.13	polymerase (RNA) II (DNA directed) polypeptide H
RFWD3	-0.0903905	1.56067	0	2	RFWD3_1189	pool11	6.76803	8.01069	5.15168	7.14173	5.99676	811.876	ring finger and WD repeat domain 3
TRIM28	-0.0146184	0.443818	0	1	TRIM28_2588	pool11	6.73452	7.40832	5.79109	7.00415	7.65911	823.941	tripartite motif containing 28
PSMB4	-0.0874591	0.360613	0	2	PSMB4_279	pool11	6.6722	8.22934	5.34728	6.43998	2.11663	307.011	proteasome subunit beta 4
MUC1	-0.0125572	0.802168	0	2	MUC1_376	pool12	6.6177	7.48185	6.95473	5.41652	2.40883	293.077	mucin 1, cell surface associated
POLE2	-0.0252581	1.27165	0	3	POLE2_1529	pool11	6.60618	7.69415	5.72685	6.39753	3.88407	392.998	polymerase (DNA directed), epsilon 2, accessory subunit
REV3L	-0.213675	1.02872	1	1	REV3L_9559	pool11	6.6059	6.87629	5.31306	7.62836	3.1905	487.486	REV3 like, DNA directed polymerase zeta catalytic subunit
NPM1	-0.00217692	1.67572	0	3	NPM1_323	pool11	6.59191	6.23138	5.83038	7.71397	5.30637	808.208	nucleophosmin (nucleolar phosphoprotein B23, numatrin)
DDB1	-0.97265	1.28567	1	1	DDB1_852	pool13	6.57029	7.02165	6.48883	6.2004	1.66049	235.78	damage specific DNA binding protein 1
RPS3	-0.321482	1.08831	2	2	RPS3_164	pool11	6.54212	7.75853	5.1358	6.73204	2.12669	328.233	ribosomal protein S3
TIPIN	-0.146789	1.59346	0	1	TIPIN_832	pool11	6.51774	7.9003	6.017	5.6359	2.29552	272.317	TIMELESS interacting protein
C19orf39	0	1.93181	0	3	C19orf39_1255	pool12	6.49925	8.07509	4.25598	7.16668	1.6293	332.598
NBN	-0.333108	0.115375	2	1	NBN_1858	pool11	6.49656	6.0282	6.22698	7.23449	6.50268	780.175	nibrin
SP100	-0.115998	0.95117	1	2	SP100_887	pool11	6.49488	6.74457	5.85139	6.88868	10.8541	1009.25	SP100 nuclear antigen
RASSF1	-0.0796679	1.42829	1	3	RASSF1_1132	pool11	6.49333	8.50538	4.29192	6.68269	38.904	1578.27	Ras association domain family member 1
CHEK1	-0.0791986	0.646853	0	1	CHEK1_935	pool11	6.44243	7.93644	4.30969	7.08117	1.94427	282.736	checkpoint kinase 1
RPA1	0	1.38828	1	2	RPA1_914	pool11	6.40083	7.03654	6.14517	6.02076	3.92841	374.143	replication protein A1
MLH3	-0.033014	0.850473	0	2	MLH3_3680	pool12	6.39568	5.55224	7.21025	6.42454	1.9888	311.537	mutL homolog 3
MYC	-0.0639389	1.29243	0	2	MYC_598	pool11	6.36294	8.80527	3.62758	6.65598	2.62908	295.842	v-myc avian myelocytomatosis viral oncogene homolog
APBB1	-0.311491	1.00789	2	1	APBB1_500	pool13	6.31826	7.59873	6.92244	4.43361	3.58127	438.809	amyloid beta precursor protein binding family B member 1
PTTG1	-0.224317	0.272866	0	1	PTTG1_237	pool11	6.30222	7.42298	5.65443	5.82925	5.30714	424.065	pituitary tumor-transforming 1
HMGB2	-0.013094	1.22403	0	2	HMGB2_629	pool11	6.26902	9.13927	5.39036	4.27743	8.56104	626.757	high mobility group box 2
HMGN1	-0.0896424	1.15428	1	3	HMGN1_1060	pool11	6.26694	9.32983	3.79208	5.67891	3.35169	495.598	high mobility group nucleosome binding domain 1
LRDD	0	0.886725	0	3	LRDD_2236	pool12	6.25213	5.25635	7.15405	6.346	1.57794	241.04
RAD50	-0.164373	0.374996	1	2	RAD50_1493	pool12	6.20046	6.17682	6.66468	5.75987	4.7327	434.237	RAD50 double strand break repair protein
CD44	-0.0711946	1.29499	1	2	CD44_258	pool11	6.1696	7.77918	5.90503	4.82459	1.02189	166.558	CD44 molecule (Indian blood group)
CASP3	-0.0876185	0.691222	0	2	CASP3_2432	pool11	6.16959	7.20664	4.03216	7.26996	0.575601	148.964	caspase 3
POLM	-0.156705	1.61261	0	1	POLM_2119	pool11	6.14826	7.92839	5.51185	5.00454	2.41478	230.761	polymerase (DNA directed), mu
PSMA6	-0.0443122	0.800245	0	2	PSMA6_270	pool12	6.14562	6.87328	6.02999	5.5336	1.53713	171.315	proteasome subunit alpha 6
MPG	0	1.29414	0	4	MPG_403	pool12	6.10866	5.25889	6.69521	6.37188	0.52274	115.312	N-methylpurine DNA glycosylase
RECQL4	-0.0534986	1.22695	1	3	RECQL4_1111	pool11	6.08838	8.13398	4.45082	5.68035	0.922385	148.565	RecQ like helicase 4
CRY1	-0.189431	1.50864	1	1	CRY1_1038	pool11	6.06407	8.9825	2.76712	6.44259	40.501	1008.09	cryptochrome circadian clock 1
POLG2	-0.00939479	1.31605	0	2	POLG2_1467	pool11	6.06249	6.18291	5.92214	6.08242	4.26755	342.152	polymerase (DNA directed), gamma 2, accessory subunit
TIMELESS	-0.273517	0.194092	0	1	TIMELESS_4984	pool11	6.04296	8.70741	3.74833	5.67314	0.845054	182.81	timeless circadian clock
CLSPN	-0.463442	0.150888	1	1	CLSPN_2677	pool13	6.04071	7.93318	4.04465	6.1443	0.928335	142.366	claspin
CD44	-0.0711946	1.29499	1	2	CD44_246	pool11	5.99319	5.09854	6.60944	6.2716	6.14748	531.818	CD44 molecule (Indian blood group)
RAD54L	0	1.67572	0	4	RAD54L_1957	pool11	5.99059	6.66321	4.9534	6.35515	37.8953	2872.38	RAD54-like (S. cerevisiae)
C19orf39	0	1.93181	0	3	C19orf39_787	pool12	5.9877	5.05458	6.82245	6.08608	3.58285	238.154
POLG2	-0.00939479	1.31605	0	2	POLG2_559	pool11	5.97342	5.99856	5.31357	6.60812	1.24623	156.205	polymerase (DNA directed), gamma 2, accessory subunit
PSMC6	-0.422393	0.958213	0	2	PSMC6_632	pool13	5.97033	6.99418	6.07337	4.84344	1.64252	137.38	proteasome 26S subunit, ATPase 6
PSMA2	-0.153725	1.51004	0	3	PSMA2_1236	pool11	5.95347	8.58934	5.70451	3.56655	4.54671	323.49	proteasome subunit alpha 2
POLD4	0	1.41794	0	3	POLD4_647	pool11	5.95129	7.05567	3.63493	7.16328	1.07946	233.916	polymerase (DNA-directed), delta 4, accessory subunit
POLA1	-0.0167346	2.25181	1	2	POLA1_3328	pool11	5.94251	8.09625	5.73249	3.9988	8.64842	555.529	polymerase (DNA directed), alpha 1, catalytic subunit
IER3	-0.166853	0.522589	0	2	IER3_600	pool12	5.94211	7.12876	4.8771	5.82047	5.57409	270.441	immediate early response 3
UBA52	-0.222646	0.142125	0	1	UBA52_258	pool11	5.91802	5.74872	6.43125	5.57408	3.46901	266.805	ubiquitin A-52 residue ribosomal protein fusion product 1
APEX2	-0.147398	0.650722	1	2	APEX2_1346	pool11	5.88944	7.62165	6.29927	3.74739	3.28312	269.715	APEX nuclease (apurinic/apyrimidinic endonuclease) 2
POLD4	0	1.41794	0	3	POLD4_818	pool11	5.88151	6.84594	6.14734	4.65125	3.36175	282.751	polymerase (DNA-directed), delta 4, accessory subunit
RBM38	-0.179339	0.598772	0	1	RBM38_1635	pool11	5.87579	7.24153	5.01102	5.37481	6.86399	428.455	RNA binding motif protein 38
PYCARD	-0.244811	0.488117	0	1	PYCARD_147	pool11	5.86347	6.67063	5.32101	5.59877	2.01396	162.481	PYD and CARD domain containing
POLR2H	-0.022185	1.25806	0	4	POLR2H_577	pool11	5.85668	5.74857	5.3315	6.48998	4.47626	313.641	polymerase (RNA) II (DNA directed) polypeptide H
MUC1	-0.0125572	0.802168	0	2	MUC1_179	pool12	5.8257	6.32615	6.03475	5.11619	0.543008	85.6955	mucin 1, cell surface associated
NSMCE1	-0.209363	0.270997	0	1	NSMCE1_282	pool12	5.81479	7.05102	3.30139	7.09195	0.830885	141.615	NSE1 homolog, SMC5-SMC6 complex component
CHEK2	-0.268009	0.541664	0	1	CHEK2_1384	pool11	5.78704	5.09805	6.34984	5.91324	6.47009	366.28	checkpoint kinase 2
APEX2	-0.147398	0.650722	1	2	APEX2_1143	pool11	5.78053	7.76144	5.10266	4.4775	0.660577	110.101	APEX nuclease (apurinic/apyrimidinic endonuclease) 2
ERCC1	-0.0214543	1.33819	0	4	ERCC1_384	pool11	5.76435	6.51856	6.04576	4.72873	1.26152	119.293	excision repair cross-complementation group 1
LIG1	-0.145937	0.2522	1	1	LIG1_1000	pool11	5.75288	8.49588	3.40008	5.3627	0.897039	185.64	ligase I, DNA, ATP-dependent
YAP1	-0.168834	1.50307	0	1	YAP1_3579	pool11	5.72562	7.70543	4.51413	4.95729	0.982015	110.891	Yes associated protein 1
MCRS1	0	1.04624	0	1	MCRS1_134	pool12	5.71721	6.61815	4.31578	6.21769	0.153796	70.7178	microspherule protein 1
BARD1	-0.250496	0.468266	1	1	BARD1_543	pool11	5.7076	5.90677	5.69902	5.517	0.752433	90.8391	BRCA1 associated RING domain 1
HMOX1	-0.042297	1.29671	0	2	HMOX1_693	pool11	5.6957	7.10712	3.27473	6.70526	0.652932	124	heme oxygenase 1
POLR2E	-0.850781	-0.447819	1	1	POLR2E_1218	pool12	5.66287	7.56522	5.09253	4.33087	1.04659	111.336	polymerase (RNA) II (DNA directed) polypeptide E, 25kDa
C19orf39	0	1.93181	0	3	C19orf39_799	pool12	5.65907	7.13918	4.18264	5.6554	0.153796	74.2749
RPA4	-0.169027	0.285419	0	2	RPA4_202	pool12	5.64849	3.83026	6.79005	6.32514	5.75127	211.643	replication protein A4
AATF	-0.274987	0.477947	1	3	AATF_969	pool11	5.64722	9.02758	1.88139	6.03269	58.9031	622.254	apoptosis antagonizing transcription factor
RPS3	-0.321482	1.08831	2	2	RPS3_25	pool11	5.64665	7.25894	6.3673	3.31372	10.6991	806.986	ribosomal protein S3
CCNA2	-0.0256726	1.72816	0	4	CCNA2_1282	pool11	5.63927	7.55057	6.02651	3.34072	2.91864	245.844	cyclin A2
SP100	-0.115998	0.95117	1	2	SP100_284	pool11	5.62675	5.93326	6.02026	4.92672	24.9975	1290.47	SP100 nuclear antigen
MAEL	-0.09442	0.982967	0	1	MAEL_27	pool13	5.62496	8.57279	6.95598	1.34611	2.54186	287.224	maelstrom spermatogenic transposon silencer
IER3	-0.166853	0.522589	0	2	IER3_1051	pool12	5.59437	3.48076	6.08932	7.21303	10.5842	608.856	immediate early response 3
MUM1	-0.605548	0.0396244	2	2	MUM1_624	pool12	5.52943	2.7184	7.01489	6.85501	11.4459	782.264	melanoma associated antigen (mutated) 1
CEBPG	-0.0174574	0.852942	0	2	CEBPG_2068	pool11	5.50927	8.93214	1.04044	6.55522	80.2574	753.095	CCAAT/enhancer binding protein gamma
UBR5	-0.0106392	0.795609	0	2	UBR5_4061	pool11	5.49508	6.70276	4.5109	5.2716	2.89253	187.836	ubiquitin protein ligase E3 component n-recognin 5
RAD54L	0	1.67572	0	4	RAD54L_1018	pool11	5.49217	6.5372	5.55896	4.38036	3.44432	199.188	RAD54-like (S. cerevisiae)
SNAI2	0	1.47237	1	2	SNAI2_1347	pool11	5.49148	7.08214	5.76341	3.6289	6.42276	269.238	snail family zinc finger 2
MUM1	-0.605548	0.0396244	2	2	MUM1_3293	pool12	5.4874	8.44964	5.58006	2.43251	17.6204	360.588	melanoma associated antigen (mutated) 1
SMC4	-0.090444	1.3279	0	1	SMC4_870	pool11	5.48001	6.37868	5.71522	4.34614	4.59322	310.728	structural maintenance of chromosomes 4
CDKN1A	-0.0305375	0.999566	0	2	CDKN1A_343	pool11	5.47965	7.61544	5.85884	2.96466	2.96057	254.53	cyclin-dependent kinase inhibitor 1A (p21, Cip1)
POLA1	-0.0167346	2.25181	1	2	POLA1_3812	pool11	5.46653	4.80469	5.93269	5.66219	9.25877	487.224	polymerase (DNA directed), alpha 1, catalytic subunit
PSMC3	-0.225994	1.17005	0	1	PSMC3_1540	pool13	5.45877	5.27528	4.75478	6.34625	2.47701	172.875	proteasome 26S subunit, ATPase 3
CDKN1A	-0.0305375	0.999566	0	2	CDKN1A_2003	pool11	5.43078	4.30818	5.25686	6.72731	4.45931	185.926	cyclin-dependent kinase inhibitor 1A (p21, Cip1)
AATF	-0.274987	0.477947	1	3	AATF_1150	pool11	5.42993	8.18227	0.985889	7.12164	133.197	1029.14	apoptosis antagonizing transcription factor
STK11	-0.225483	0.313811	0	1	STK11_928	pool12	5.4277	4.57224	5.97563	5.73524	0.317588	63.2745	serine/threonine kinase 11
CRIP1	0	1.2815	0	3	CRIP1_325	pool11	5.42476	4.27005	6.26701	5.73721	0.386654	69.5076	cysteine rich protein 1
EEPD1	-0.188224	0.299729	0	1	EEPD1_4070	pool12	5.42344	3.07578	6.22213	6.97242	12.374	340.382	endonuclease/exonuclease/phosphatase family domain containing 1
MPG	0	1.29414	0	4	MPG_454	pool12	5.42065	5.19783	4.01855	7.04557	0.245688	93.1301	N-methylpurine DNA glycosylase
LRDD	0	0.886725	0	3	LRDD_604	pool12	5.4075	5.34443	7.35328	3.52478	11.4556	656.493
RFC1	-0.194227	0.238222	0	1	RFC1_1267	pool11	5.40713	8.67627	1.63524	5.90987	201.713	1616.83	replication factor C subunit 1
ATAD5	-0.105795	0.420674	0	2	ATAD5_3282	pool12	5.3909	3.24309	6.61429	6.3153	30.1016	670.05	ATPase family, AAA domain containing 5
DDB2	-0.00291956	1.10735	0	1	DDB2_1470	pool11	5.38993	5.09834	3.94443	7.12701	2.00872	237.115	damage specific DNA binding protein 2
SHFM1	-0.267606	0.369776	1	1	SHFM1_121	pool11	5.35038	7.32126	6.30576	2.42413	32.3163	608.189	split hand/foot malformation (ectrodactyly) type 1
FEN1	-0.171405	0.263683	0	1	FEN1_1837	pool12	5.32289	2.11009	6.66395	7.19462	39.2978	697.372	flap structure-specific endonuclease 1
MUTYH	-0.0210438	1.27084	0	4	MUTYH_358	pool11	5.32112	4.56201	5.70022	5.70114	1.61278	125.416	mutY DNA glycosylase
UHRF1	-0.0184985	0.796152	0	1	UHRF1_2059	pool12	5.30851	2.97432	6.74099	6.21021	6.82784	235.649	ubiquitin-like with PHD and ring finger domains 1
MSH6	-0.146606	0.216597	1	1	MSH6_2742	pool11	5.30705	7.15611	5.24693	3.51809	7.43029	170.874	mutS homolog 6
TOPORS	-0.523603	0.636012	0	1	TOPORS_1583	pool12	5.29179	3.36676	7.04154	5.46706	23.4554	862.978	topoisomerase I binding, arginine/serine-rich, E3 ubiquitin protein ligase
UNG	-0.000477987	4	0	3	UNG_1375	pool11	5.26785	3.67715	5.91554	6.21085	27.2309	933.43	uracil DNA glycosylase
DYRK2	-0.188961	0.38563	1	3	DYRK2_4338	pool12	5.26741	1.73444	7.3894	6.6784	73.2047	738.194	dual specificity tyrosine phosphorylation regulated kinase 2
CDK9	-0.322758	0.120159	0	1	CDK9_2329	pool12	5.25451	3.17262	6.9838	5.60713	23.8032	434.423	cyclin-dependent kinase 9
CCNA2	-0.0256726	1.72816	0	4	CCNA2_808	pool11	5.25124	8.23298	3.25825	4.26249	84.0978	1205.71	cyclin A2
HMOX1	-0.042297	1.29671	0	2	HMOX1_1267	pool11	5.24074	8.22392	5.57839	1.91992	15.8262	395.851	heme oxygenase 1
MYC	-0.0639389	1.29243	0	2	MYC_2199	pool11	5.23845	7.90487	0.749151	7.06131	0.593301	199.635	v-myc avian myelocytomatosis viral oncogene homolog
MSX1	-0.048274	0.278602	0	1	MSX1_1841	pool11	5.22836	7.01355	6.16204	2.50949	13.9926	240.881	msh homeobox 1
CUL4A	-0.0962591	0.616364	0	1	CUL4A_1186	pool11	5.22651	8.99139	-0.145012	6.83316	330.921	1266.34	cullin 4A
MCM9	-0.261537	0.992679	1	1	MCM9_446	pool11	5.20207	6.7951	5.15574	3.65538	14.0498	273.499	minichromosome maintenance 9 homologous recombination repair factor
POLE	-0.00322573	0.778847	0	3	POLE_4212	pool12	5.19068	3.73195	6.17721	5.66289	1.0441	74.8031	polymerase (DNA directed), epsilon, catalytic subunit
PPP4C	0	1.1831	1	2	PPP4C_201	pool11	5.17582	4.04838	4.2753	7.20379	18.6657	444.32	protein phosphatase 4 catalytic subunit
STRA13	-0.34515	0.0381994	0	1	STRA13_543	pool12	5.17491	8.21836	0.370116	6.93626	27.188	205.834	stimulated by retinoic acid 13
SMC3	-0.088576	0.488384	0	1	SMC3_3107	pool12	5.16852	7.6358	4.74127	3.12847	0.862802	100.203	structural maintenance of chromosomes 3
ASTE1	-0.0715529	0.743282	0	1	ASTE1_1635	pool11	5.15277	9.48491	1.37628	4.59713	130.352	706.338	asteroid homolog 1 (Drosophila)
POLE2	-0.0252581	1.27165	0	3	POLE2_401	pool11	5.14935	7.99839	0.447659	7.002	1.29375	277.865	polymerase (DNA directed), epsilon 2, accessory subunit
GTSE1	-0.147154	0.54546	1	1	GTSE1_2463	pool11	5.12988	7.61401	0.194873	7.58075	2.0937	429.144	G2 and S-phase expressed 1
RAD54L	0	1.67572	0	4	RAD54L_1563	pool11	5.12775	4.54327	6.21625	4.62374	4.96523	189.076	RAD54-like (S. cerevisiae)
TP53BP1	-0.688458	0.139004	0	1	TP53BP1_746	pool12	5.11368	1.9579	7.22054	6.16261	15.619	407.745	tumor protein p53 binding protein 1
RASSF1	-0.0796679	1.42829	1	3	RASSF1_943	pool11	5.08967	2.78671	6.24625	6.23603	75.6505	1308.56	Ras association domain family member 1
PARP3	-0.0959339	0.856673	0	1	PARP3_886	pool11	5.08594	9.16244	-0.882295	6.97769	0.982015	261.846	poly(ADP-ribose) polymerase family member 3
PSMB8	-0.254223	0.306713	1	1	PSMB8_585	pool11	5.0805	3.81022	5.28781	6.14345	21.7252	422.46	proteasome subunit beta 8
H2AFX	-0.00983881	0.838932	0	2	H2AFX_1524	pool12	5.07978	3.61539	6.48964	5.1343	3.29663	131.737	H2A histone family member X
FANCA	-0.378097	0.331894	1	2	FANCA_473	pool12	5.07548	1.25024	6.97354	7.00266	60.9471	965.972	Fanconi anemia complementation group A
UIMC1	-0.155336	0.292345	1	2	UIMC1_1431	pool11	5.07168	2.68841	6.02186	6.50477	50.4822	948.003	ubiquitin interaction motif containing 1
CCNA2	-0.0256726	1.72816	0	4	CCNA2_1130	pool11	5.06967	3.18968	6.16587	5.85346	77.6457	2156.99	cyclin A2
PSMA4	-0.10111	1.25337	1	3	PSMA4_882	pool11	5.06946	6.9558	4.58708	3.66551	0.767723	68.4409	proteasome subunit alpha 4
POLQ	-0.125576	0.71287	0	2	POLQ_1097	pool11	5.06727	8.34627	4.98601	1.86954	77.935	593.232	polymerase (DNA directed), theta
TOPBP1	-0.538952	-0.125228	1	1	TOPBP1_576	pool12	5.05462	3.10131	6.05498	6.00757	12.4658	258.008	topoisomerase (DNA) II binding protein 1
POLD4	0	1.41794	0	3	POLD4_648	pool11	5.05438	3.05567	6.28916	5.81831	83.8885	1521.06	polymerase (DNA-directed), delta 4, accessory subunit
FANCF	-0.0013484	0.783043	0	2	FANCF_2567	pool11	5.04811	1.80438	6.32635	7.01361	71.9155	1153.47	Fanconi anemia complementation group F
RBBP8	-0.260744	0.434034	0	1	RBBP8_899	pool11	5.04188	6.75306	2.18022	6.19234	53.1129	438.169	retinoblastoma binding protein 8
TREX1	-0.682354	-0.259322	3	1	TREX1_1274	pool12	5.02569	3.06074	7.00425	5.01208	14.1326	251.3	three prime repair exonuclease 1
CDK7	-0.255472	0.65267	0	2	CDK7_894	pool12	5.01238	1.65237	6.3251	7.05966	19.1985	336.328	cyclin-dependent kinase 7
C17orf70	-0.0884695	0.693575	0	1	C17orf70_1420	pool12	5.01082	1.8513	6.08776	7.09339	29.9137	455.672
SMC2	-0.00917295	2.50864	0	2	SMC2_3995	pool11	5.00832	4.09783	5.48135	5.44578	10.7331	350.781	structural maintenance of chromosomes 2
PAXIP1	-0.159706	0.863279	0	1	PAXIP1_1422	pool11	4.99731	4.58181	3.4387	6.97144	1.45047	113.788	PAX interacting (with transcription-activation domain) protein 1
CDK7	-0.255472	0.65267	0	2	CDK7_771	pool12	4.99666	2.93843	5.31164	6.7399	18.1336	272.869	cyclin-dependent kinase 7
XAB2	-0.0825995	0.730954	0	1	XAB2_1905	pool12	4.97548	1.98757	5.68664	7.25224	50.7176	613.682	XPA binding protein 2
LIG3	0	0.957818	0	2	LIG3_1636	pool12	4.95903	3.87846	5.30044	5.69819	6.17213	161.932	ligase III, DNA, ATP-dependent
POLH	-0.272866	0.510604	1	1	POLH_6168	pool12	4.94922	2.47019	5.73448	6.643	17.2424	253.941	polymerase (DNA directed), eta
CHAF1A	-0.0716041	0.423543	1	2	CHAF1A_3082	pool12	4.94638	1.01985	7.32681	6.49249	3.18725	433.613	chromatin assembly factor 1 subunit A
MDC1	-0.00833099	0.785686	0	2	MDC1_1558	pool12	4.92995	3.7303	4.97409	6.08545	9.31966	260.727	mediator of DNA damage checkpoint 1
MUTYH	-0.0210438	1.27084	0	4	MUTYH_356	pool11	4.92703	7.68886	1.95225	5.13999	10.5877	151.65	mutY DNA glycosylase
ASCC3	-0.125634	0.323855	1	1	ASCC3_459	pool11	4.9122	5.27722	5.28173	4.17764	1.20242	76.0075	activating signal cointegrator 1 complex subunit 3
SMARCA5	-0.115998	0.584693	0	1	SMARCA5_2607	pool11	4.91197	3.2757	5.68599	5.77421	20.7907	440.015	SWI/SNF related, matrix associated, actin dependent regulator of chromatin, subfamily a, member 5
MCM7	-0.00784429	0.760951	0	3	MCM7_674	pool11	4.91132	5.26484	3.14656	6.32257	27.9786	582.494	minichromosome maintenance complex component 7
MUTYH	-0.0210438	1.27084	0	4	MUTYH_233	pool11	4.90866	4.33703	6.94311	3.44583	2.43043	198.892	mutY DNA glycosylase
FANCA	-0.378097	0.331894	1	2	FANCA_268	pool12	4.90802	1.84661	6.72339	6.15407	109.541	1264.61	Fanconi anemia complementation group A
PSMA3	-0.437469	-0.120044	2	1	PSMA3_334	pool12	4.90789	2.55374	6.12538	6.04455	12.3856	256.532	proteasome subunit alpha 3
RFC3	-0.287856	0.103749	1	2	RFC3_591	pool12	4.90473	6.01814	4.70303	3.99301	0.225696	39.6426	replication factor C subunit 3
RFC2	-0.00930604	1.91009	0	1	RFC2_398	pool11	4.90097	9.88656	-1.49382	6.31016	1.4106	359.917	replication factor C subunit 2
ERCC1	-0.0214543	1.33819	0	4	ERCC1_561	pool11	4.90057	8.53605	1.8949	4.27075	36.4231	279.12	excision repair cross-complementation group 1
FANCM	-0.166025	0.233215	0	2	FANCM_2183	pool12	4.89397	1.18761	6.68167	6.81264	57.9991	468.749	Fanconi anemia complementation group M
CHAF1B	-0.174964	1.32883	1	1	CHAF1B_1920	pool13	4.88035	3.43454	4.7779	6.4286	28.2457	622.285	chromatin assembly factor 1 subunit B
RPA1	0	1.38828	1	2	RPA1_2502	pool11	4.86115	8.16275	2.25375	4.16696	166.038	1570.17	replication protein A1
ATRIP	-0.188961	0.414878	0	1	ATRIP_658	pool12	4.85491	2.66684	6.78414	5.11376	11.3082	179.907	ATR interacting protein
PSMD2	-0.0897492	0.471083	0	1	PSMD2_2891	pool12	4.85431	1.50055	6.37361	6.68876	95.247	740.826	proteasome 26S subunit, non-ATPase 2
POLR2L	-0.0713482	0.467118	0	2	POLR2L_860	pool12	4.85265	3.75909	4.58405	6.21481	31.4963	630.162	polymerase (RNA) II (DNA directed) polypeptide L, 7.6kDa
EYA3	-0.0820746	0.571541	0	3	EYA3_1657	pool12	4.83935	0.871924	6.68598	6.96014	426.429	2553.73	EYA transcriptional coactivator and phosphatase 3
PARP9	-0.349401	0.215739	0	1	PARP9_1136	pool12	4.8382	0.684645	6.34305	7.48691	311.617	1672.49	poly(ADP-ribose) polymerase family member 9
XPC	-1.03858	0.022688	0	1	XPC_939	pool12	4.83334	7.3687	2.91894	4.21237	6.3053	114.971	xeroderma pigmentosum, complementation group C
POLE	-0.00322573	0.778847	0	3	POLE_972	pool12	4.82398	1.15111	6.29994	7.0209	75.1779	417.307	polymerase (DNA directed), epsilon, catalytic subunit
POLE2	-0.0252581	1.27165	0	3	POLE2_583	pool11	4.82241	4.01797	5.53505	4.9142	23.0064	515.78	polymerase (DNA directed), epsilon 2, accessory subunit
XRCC4	-0.0485168	0.883724	0	1	XRCC4_374	pool11	4.82093	8.9763	5.13254	0.353948	87.5847	485.081	X-ray repair complementing defective repair in Chinese hamster cells 4
UBR5	-0.0106392	0.795609	0	2	UBR5_10313	pool11	4.81802	7.81747	0.964066	5.67252	72.22	308.087	ubiquitin protein ligase E3 component n-recognin 5
KIAA0101	-0.143332	0.329569	1	2	KIAA0101_872	pool11	4.81633	1.71445	6.12927	6.60526	57.7264	635.143	KIAA0101
FOXO1	-0.286593	-0.0303512	0	1	FOXO1_3397	pool12	4.81224	8.76995	-0.453095	6.11986	216.155	585.94	forkhead box O1
RASSF1	-0.0796679	1.42829	1	3	RASSF1_43	pool11	4.811	8.30562	0.709331	5.41807	114.665	689.601	Ras association domain family member 1
MAPK14	-0.236497	0.295078	0	2	MAPK14_764	pool12	4.80731	1.01647	7.58442	5.82103	18.7154	219.091	mitogen-activated protein kinase 14
CRIP1	0	1.2815	0	3	CRIP1_130	pool11	4.80315	6.05424	5.03962	3.3156	4.07501	147.67	cysteine rich protein 1
BCCIP	-0.199489	1.72125	1	2	BCCIP_755	pool11	4.8027	7.34425	1.56139	5.50245	0.107146	69.5757	BRCA2 and CDKN1A interacting protein
IRF7	-0.0594835	1.18177	1	2	IRF7_1667	pool11	4.8004	5.41212	4.4636	4.5255	1.02747	53.8337	interferon regulatory factor 7
BRIP1	-0.331335	-0.0308638	1	1	BRIP1_2684	pool12	4.79953	1.7012	7.37449	5.32291	58.295	426.119	BRCA1 interacting protein C-terminal helicase 1
PSMB7	-0.231288	0.176395	1	2	PSMB7_213	pool12	4.79478	4.91897	4.96943	4.49596	1.3006	66.0746	proteasome subunit beta 7
SMC1A	-0.175159	0.305834	0	3	SMC1A_9361	pool12	4.79187	1.88568	4.9536	7.53631	80.5547	592.879	structural maintenance of chromosomes 1A
EYA2	-0.15484	0.779369	0	1	EYA2_415	pool11	4.78945	7.17483	5.70439	1.48914	50.4771	319.953	EYA transcriptional coactivator and phosphatase 2
FANCM	-0.166025	0.233215	0	2	FANCM_2874	pool12	4.78887	0.692222	6.90719	6.76719	186.361	793.04	Fanconi anemia complementation group M
CEBPG	-0.0174574	0.852942	0	2	CEBPG_527	pool11	4.78858	7.27265	2.23162	4.86147	0.214292	62.8045	CCAAT/enhancer binding protein gamma
ZMAT3	-1.22185	-0.0970186	3	1	ZMAT3_4156	pool13	4.78135	1.76282	5.973	6.60823	30.7102	505.677	zinc finger matrin-type 3
RINT1	-0.128252	0.578725	0	1	RINT1_2069	pool11	4.77918	1.90384	5.80023	6.63348	41.9617	603.134	RAD50 interactor 1
RAD51L3	-0.189767	0.613144	1	1	RAD51L3_498	pool13	4.77348	7.17827	6.24738	0.894798	48.2281	462.884
USP28	-0.12436	0.424581	1	2	USP28_236	pool12	4.76565	4.52079	2.40018	7.37597	59.7235	1065.14	ubiquitin specific peptidase 28
CDK2	-0.140082	0.591082	0	3	CDK2_1974	pool11	4.75934	1.60559	5.83762	6.83482	118.998	1132.92	cyclin-dependent kinase 2
BCL2L1	-1.04001	-0.0494891	2	1	BCL2L1_1028	pool13	4.75869	3.46536	7.17134	3.63939	7.05289	192.08	BCL2 like 1
RNF169	-0.572514	0.0512937	1	1	RNF169_4502	pool12	4.74979	0.771291	6.41902	7.05908	29.9731	373.305	ring finger protein 169
ALKBH2	-0.280337	0.135489	0	1	ALKBH2_393	pool12	4.74968	0.424548	7.08797	6.73652	361.069	1413.63	alkB homolog 2, alpha-ketoglutarate-dependent dioxygenase
XRCC6	-0.365624	0.0924274	0	2	XRCC6_842	pool12	4.74943	0.531696	6.75334	6.96326	135.323	619.774	X-ray repair complementing defective repair in Chinese hamster cells 6
CDK2	-0.140082	0.591082	0	3	CDK2_388	pool11	4.74884	7.72434	-0.135351	6.65753	1.69569	221.034	cyclin-dependent kinase 2
ERCC1	-0.0214543	1.33819	0	4	ERCC1_383	pool11	4.74206	6.36207	-0.30308	8.16719	2.68753	465.765	excision repair cross-complementation group 1
SMUG1	-0.202594	0.344094	0	1	SMUG1_1345	pool12	4.73046	0.628268	6.68252	6.8806	91.1317	682.65	single-strand-selective monofunctional uracil-DNA glycosylase 1
ZFYVE26	-0.370794	0.65817	1	2	ZFYVE26_6158	pool11	4.73034	7.81747	-0.144124	6.51769	2.15203	276.665	zinc finger FYVE-type containing 26
ERCC5	-0.224026	0.17744	0	2	ERCC5_2721	pool12	4.72552	3.25649	5.55799	5.36207	5.56998	132.859	excision repair cross-complementation group 5
BTG2	-0.217527	0.169475	0	1	BTG2_2612	pool12	4.72482	2.79283	6.52574	4.85587	49.4298	664.036	BTG family member 2
SNAI2	0	1.47237	1	2	SNAI2_988	pool11	4.71521	1.79029	6.24926	6.10606	48.3881	615.43	snail family zinc finger 2
MCL1	-0.00471589	0.798057	0	2	MCL1_767	pool11	4.71484	1.59297	5.26987	7.28169	21.2078	398.259	myeloid cell leukemia 1
PSMC4	-0.0332015	1.82974	0	3	PSMC4_506	pool11	4.71407	6.73164	0.285435	7.12512	1.48828	264.349	proteasome 26S subunit, ATPase 4
PSMC4	-0.0332015	1.82974	0	3	PSMC4_1154	pool11	4.71279	8.57783	3.75975	1.80078	82.1352	750.076	proteasome 26S subunit, ATPase 4
ERCC1	-0.0214543	1.33819	0	4	ERCC1_192	pool11	4.71058	2.60808	5.91034	5.61332	18.9391	309.292	excision repair cross-complementation group 1
RUVBL2	-0.0803467	0.628563	0	3	RUVBL2_1442	pool12	4.70604	-0.0696592	6.46589	7.72189	60.2619	665.608	RuvB-like AAA ATPase 2
RAD54L	0	1.67572	0	4	RAD54L_1129	pool11	4.69492	3.14412	5.93923	5.00142	82.4675	1248.3	RAD54-like (S. cerevisiae)
RPAIN	-0.525347	-0.183361	1	1	RPAIN_794	pool12	4.68876	1.11349	7.29082	5.66198	67.5964	407.023	RPA interacting protein
XRCC6BP1	-0.807711	1.37675	0	1	XRCC6BP1_894	pool13	4.68708	6.46337	4.11049	3.48739	35.141	680.168
TRIP13	-0.171276	0.552532	0	1	TRIP13_487	pool11	4.68384	7.59887	6.67023	-0.217579	172.319	401.042	thyroid hormone receptor interactor 13
CRIP1	0	1.2815	0	3	CRIP1_330	pool11	4.6754	7.23523	3.2704	3.52055	57.0065	765.485	cysteine rich protein 1
EYA1	-0.218604	0.938548	0	1	EYA1_1476	pool13	4.67271	1.72634	6.21333	6.07847	86.507	678.84	EYA transcriptional coactivator and phosphatase 1
CASP3	-0.0876185	0.691222	0	2	CASP3_1301	pool11	4.67199	9.06987	4.42127	0.524833	118.279	501.139	caspase 3
MUTYH	-0.0210438	1.27084	0	4	MUTYH_1272	pool11	4.66861	7.54514	6.18742	0.273273	94.7488	779.672	mutY DNA glycosylase
PARP4	-0.184688	0.526075	0	1	PARP4_1887	pool11	4.66191	8.30524	6.21778	-0.537278	1.47582	193.703	poly(ADP-ribose) polymerase family member 4
MPG	0	1.29414	0	4	MPG_453	pool12	4.65981	6.22641	1.47906	6.27397	10.7731	117.369	N-methylpurine DNA glycosylase
VCP	-0.314617	0.75721	0	1	VCP_555	pool13	4.64478	1.81024	5.6875	6.4366	13.6569	142.649	valosin containing protein
C1orf124	-0.275069	0.161214	0	2	C1orf124_1676	pool12	4.63728	1.59567	5.78893	6.52725	27.6279	188.005
RAD17	-0.581367	-0.396964	2	1	RAD17_162	pool12	4.63451	1.29387	7.25166	5.35801	31.774	306.3	RAD17 checkpoint clamp loader component
POLR2D	-0.124187	1.73993	1	1	POLR2D_888	pool11	4.63022	1.78311	6.02278	6.08476	110.665	910.484	polymerase (RNA) II (DNA directed) polypeptide D
XRCC6	-0.365624	0.0924274	0	2	XRCC6_481	pool12	4.62663	0.186641	6.72535	6.96789	140.407	425.443	X-ray repair complementing defective repair in Chinese hamster cells 6
HMGN1	-0.0896424	1.15428	1	3	HMGN1_560	pool11	4.62335	6.58365	6.88921	0.397176	226.761	739.99	high mobility group nucleosome binding domain 1
FANCF	-0.0013484	0.783043	0	2	FANCF_1460	pool11	4.6228	0.937409	6.19692	6.73406	67.0799	338.203	Fanconi anemia complementation group F
REV1	-0.29056	0.412738	1	1	REV1_1241	pool12	4.62202	7.88603	7.228	-1.24796	1.09629	188.333	REV1, DNA directed polymerase
RDM1	-0.117191	0.519418	0	2	RDM1_197	pool12	4.62081	5.40953	1.5965	6.85639	26.6997	304.792	RAD52 motif containing 1
HUS1	-0.22439	0.0921589	0	1	HUS1_2794	pool12	4.61295	2.05902	5.97142	5.8084	30.9339	232.282	HUS1 checkpoint clamp component
UNG	-0.000477987	4	0	3	UNG_743	pool11	4.61085	8.59119	6.1726	-0.931244	71.816	756.96	uracil DNA glycosylase
LRDD	0	0.886725	0	3	LRDD_198	pool12	4.60947	2.4016	6.07076	5.35606	19.6896	207.369
HMGB1	-0.262807	0.298173	1	1	HMGB1_2309	pool11	4.60109	3.79998	5.70408	4.2992	48.8585	1141.48	high mobility group box 1
OBFC2A	-0.480566	-0.0213631	0	1	OBFC2A_2571	pool12	4.59503	-0.0158178	6.43226	7.36867	357.656	1365.77
LIG3	0	0.957818	0	2	LIG3_2404	pool12	4.59173	1.79156	6.61165	5.37198	12.8631	167.376	ligase III, DNA, ATP-dependent
RDM1	-0.117191	0.519418	0	2	RDM1_258	pool12	4.59009	0.748612	6.33026	6.69141	117.398	493.605	RAD52 motif containing 1
CDK2	-0.140082	0.591082	0	3	CDK2_387	pool11	4.58426	7.28235	-0.862682	7.33312	1.01871	164.113	cyclin-dependent kinase 2
EYA3	-0.0820746	0.571541	0	3	EYA3_5156	pool12	4.57528	-0.148394	7.0209	6.85332	115.464	633.834	EYA transcriptional coactivator and phosphatase 3
SOX4	-0.157079	0.721018	0	1	SOX4_2293	pool11	4.56424	1.92903	5.93729	5.82641	77.6212	747.373	SRY-box 4
RECQL4	-0.0534986	1.22695	1	3	RECQL4_1105	pool11	4.56248	5.73543	5.41283	2.53917	3.39509	111.721	RecQ like helicase 4
MYO6	-1.50031	-0.592439	1	1	MYO6_5906	pool12	4.56203	-0.251545	7.20695	6.73069	260.274	651.724	myosin VI
POLE	-0.00322573	0.778847	0	3	POLE_2189	pool12	4.5581	1.06145	7.40531	5.20753	44.2965	281.736	polymerase (DNA directed), epsilon, catalytic subunit
GTF2H1	-0.161592	0.234928	0	2	GTF2H1_3180	pool12	4.55422	0.143702	6.85423	6.66475	352.482	1119.41	general transcription factor IIH subunit 1
PSME4	-0.00449643	0.932557	0	2	PSME4_1418	pool11	4.55404	0.853206	5.79682	7.01209	111.942	603.323	proteasome activator subunit 4
MNDA	-0.127494	0.888401	0	1	MNDA_1433	pool11	4.54892	8.29164	5.70133	-0.346198	224.277	747.645	myeloid cell nuclear differentiation antigen
USP3	-0.0540393	0.741602	0	2	USP3_464	pool11	4.53142	5.8854	1.38634	6.32252	182.867	1137.36	ubiquitin specific peptidase 3
RUVBL1	-0.209433	0.426085	1	2	RUVBL1_991	pool11	4.52936	8.57453	5.94123	-0.927663	3.30288	279.016	RuvB like AAA ATPase 1
KIF22	-0.106571	1.62525	1	3	KIF22_1423	pool11	4.52919	5.32842	5.79664	2.46252	69.82	565.139	kinesin family member 22
XRCC1	-0.0085967	1.0752	0	1	XRCC1_1947	pool12	4.52587	8.57153	5.0891	-0.0830242	0.657098	157.131	X-ray repair complementing defective repair in Chinese hamster cells 1
MPG	0	1.29414	0	4	MPG_906	pool12	4.52466	0.493971	6.45964	6.62037	150.487	552.401	N-methylpurine DNA glycosylase
GTF2H1	-0.161592	0.234928	0	2	GTF2H1_3225	pool12	4.52062	1.24181	5.68492	6.63513	39.7647	298.595	general transcription factor IIH subunit 1
MCL1	-0.00471589	0.798057	0	2	MCL1_2515	pool11	4.50953	8.04242	-1.77519	7.26137	382.045	987.956	myeloid cell leukemia 1
PSME1	-0.196884	0.256333	1	1	PSME1_231	pool11	4.50842	5.71526	1.35599	6.45399	0.600946	81.0346	proteasome activator subunit 1
EGLN3	-0.245422	0.132356	0	1	EGLN3_2516	pool12	4.50084	0.0628401	6.95124	6.48846	343.919	1057.27	egl-9 family hypoxia-inducible factor 3
PSME2	-0.277119	0.287771	0	1	PSME2_313	pool11	4.49861	7.10942	0.542498	5.84391	61.8965	246.936	proteasome activator subunit 2
POLR2H	-0.022185	1.25806	0	4	POLR2H_193	pool11	4.49778	1.67169	4.89611	6.92555	87.3705	623.664	polymerase (RNA) II (DNA directed) polypeptide H
MDM2	-0.339799	0.220837	1	2	MDM2_3926	pool12	4.49762	1.0371	7.30907	5.14667	40.9521	324.117	MDM2 proto-oncogene, E3 ubiquitin protein ligase
HERC2	0	1.07058	0	1	HERC2_14534	pool13	4.49685	2.97651	4.0367	6.47732	11.7929	236.08	HECT and RLD domain containing E3 ubiquitin protein ligase 2
EYA3	-0.0820746	0.571541	0	3	EYA3_1440	pool12	4.49112	7.41728	6.37303	-0.316943	0.728168	156.424	EYA transcriptional coactivator and phosphatase 3
SMC2	-0.00917295	2.50864	0	2	SMC2_2090	pool11	4.48844	7.22429	6.51921	-0.278166	1.78961	193.359	structural maintenance of chromosomes 2
RFC3	-0.287856	0.103749	1	2	RFC3_461	pool12	4.48667	2.08501	5.09326	6.28175	25.4097	357.143	replication factor C subunit 3
RFWD3	-0.0903905	1.56067	0	2	RFWD3_437	pool11	4.47834	7.29399	-1.74275	7.88378	62.6829	234.762	ring finger and WD repeat domain 3
PSMA4	-0.10111	1.25337	1	3	PSMA4_263	pool11	4.47792	0.449114	6.31482	6.66984	3.10312	315.435	proteasome subunit alpha 4
CCNA2	-0.0256726	1.72816	0	4	CCNA2_2211	pool11	4.47753	4.91919	5.509	3.00438	29.7379	435.252	cyclin A2
POLD2	-0.00296329	1.1549	0	1	POLD2_242	pool11	4.47066	6.08489	-0.0177613	7.34485	0.43864	120.716	polymerase (DNA directed), delta 2, accessory subunit
CHD1L	-0.133417	0.659953	0	1	CHD1L_2026	pool11	4.47008	7.65704	5.88751	-0.134319	1.45812	150.098	chromodomain helicase DNA binding protein 1-like
BCL6	-0.0973445	0.928486	1	2	BCL6_2472	pool11	4.46581	7.78289	5.60021	0.0143218	563.328	1199.54	B-cell CLL/lymphoma 6
UACA	-0.573164	0.0151578	1	1	UACA_2840	pool12	4.46388	0.838673	6.70388	5.84907	79.2311	431.047	uveal autoantigen with coiled-coil domains and ankyrin repeats
NONO	-0.0937727	0.453828	0	2	NONO_683	pool11	4.46292	8.8704	6.01281	-1.49444	709.2	1164.92	non-POU domain containing, octamer-binding
ATAD5	-0.105795	0.420674	0	2	ATAD5_1431	pool12	4.46104	1.36578	5.539	6.47834	62.201	438.825	ATPase family, AAA domain containing 5
AATF	-0.274987	0.477947	1	3	AATF_1733	pool11	4.45606	7.92917	5.72273	-0.283713	1.67241	166.34	apoptosis antagonizing transcription factor
PSMA4	-0.10111	1.25337	1	3	PSMA4_557	pool11	4.45419	7.03583	1.86569	4.46106	0.184477	53.3898	proteasome subunit alpha 4
MCM7	-0.00784429	0.760951	0	3	MCM7_52	pool11	4.44838	0.848705	5.76149	6.73494	135.573	994.931	minichromosome maintenance complex component 7
RIF1	-0.102098	0.743763	0	1	RIF1_7989	pool12	4.44792	0.662108	5.96507	6.71658	152.297	557.186	replication timing regulatory factor 1
SMC1A	-0.175159	0.305834	0	3	SMC1A_6246	pool12	4.43928	-0.38081	6.71681	6.98185	250.298	608.486	structural maintenance of chromosomes 1A
CASP2	-0.168642	0.670602	0	1	CASP2_2386	pool11	4.43831	6.58984	4.23274	2.49235	34.3222	310.223	caspase 2
NDNL2	-0.234331	0.269379	0	1	NDNL2_409	pool12	4.43788	9.10036	0.261692	3.95158	69.9886	314.161
PSMA6	-0.0443122	0.800245	0	2	PSMA6_968	pool12	4.43591	1.8742	4.59123	6.84229	19.6493	468.353	proteasome subunit alpha 6
ZFYVE26	-0.370794	0.65817	1	2	ZFYVE26_6459	pool11	4.43534	8.25681	-0.47894	5.52815	673.691	1312.12	zinc finger FYVE-type containing 26
PSMD1	-0.171791	0.466609	0	1	PSMD1_845	pool13	4.43173	1.50597	6.24735	5.54187	48.7765	270.109	proteasome 26S subunit, non-ATPase 1
CHAF1A	-0.0716041	0.423543	1	2	CHAF1A_3032	pool12	4.43163	6.86226	0.597691	5.83494	86.4918	260.136	chromatin assembly factor 1 subunit A
ERCC4	-0.137451	0.310425	0	1	ERCC4_1003	pool12	4.4229	0.303325	6.82762	6.13775	61.4448	219.026	excision repair cross-complementation group 4
DYRK2	-0.188961	0.38563	1	3	DYRK2_3230	pool12	4.42016	-0.277802	6.47994	7.05835	212.032	542.727	dual specificity tyrosine phosphorylation regulated kinase 2
RPA4	-0.169027	0.285419	0	2	RPA4_720	pool12	4.41309	0.717352	4.64453	7.8774	73.9592	299.48	replication protein A4
RUVBL2	-0.0803467	0.628563	0	3	RUVBL2_509	pool12	4.41293	0.0796682	6.196	6.96313	176.317	868.425	RuvB-like AAA ATPase 2
KIF22	-0.106571	1.62525	1	3	KIF22_544	pool11	4.40957	9.25687	4.43823	-0.466393	1686.04	2432.17	kinesin family member 22
NUPR1	-0.0639389	3.39794	0	1	NUPR1_551	pool11	4.40931	7.42409	4.50593	1.29791	0.987601	71.4101	nuclear protein 1, transcriptional regulator
ATM	-0.65738	0.675306	1	1	ATM_924	pool12	4.40835	3.83364	7.01621	2.37522	13.4486	344.326	ATM serine/threonine kinase
SMC1A	-0.175159	0.305834	0	3	SMC1A_2231	pool12	4.40165	-0.948023	7.01096	7.142	602.902	2889.84	structural maintenance of chromosomes 1A
IFI16	-0.240408	0.333482	0	1	IFI16_304	pool11	4.40117	1.7963	5.9235	5.48372	288.776	2066.75	interferon, gamma-inducible protein 16
CSNK1D	-0.0332015	0.441772	0	2	CSNK1D_3646	pool11	4.39443	0.440158	5.84731	6.89582	413.139	2131.03	casein kinase 1 delta
CEP164	-0.27417	0.245499	1	1	CEP164_424	pool11	4.39376	7.78913	3.63116	1.76098	9.17832	199.64	centrosomal protein 164kDa
WRNIP1	-0.660747	0.0541377	2	1	WRNIP1_2127	pool12	4.39328	-0.445145	7.38204	6.24295	67.4934	316.298	Werner helicase interacting protein 1
GTF2H4	-0.12384	0.815309	0	1	GTF2H4_1292	pool11	4.39022	7.82037	-0.810425	6.16072	3.03026	216.804	general transcription factor IIH subunit 4
TONSL	-0.26536	0.749092	0	1	TONSL_2815	pool13	4.38754	2.94541	4.92854	5.28867	2.23574	54.9076	tonsoku-like, DNA repair protein
POLR2L	-0.0713482	0.467118	0	2	POLR2L_716	pool12	4.38554	0.1769	7.06056	5.91916	73.4989	296.209	polymerase (RNA) II (DNA directed) polypeptide L, 7.6kDa
CDKN1B	-0.201211	0.272052	0	2	CDKN1B_2028	pool12	4.38324	0.634423	6.61303	5.90228	43.1816	289.487	cyclin-dependent kinase inhibitor 1B (p27, Kip1)
BCCIP	-0.199489	1.72125	1	2	BCCIP_187	pool11	4.38047	5.13884	2.12438	5.87818	92.1771	952.249	BRCA2 and CDKN1A interacting protein
BAG6	-0.287687	0.277448	1	2	BAG6_2220	pool12	4.37871	0.284684	6.35675	6.49469	69.7431	263.994	BCL2 associated athanogene 6
ERCC5	-0.224026	0.17744	0	2	ERCC5_3431	pool12	4.37839	-0.443909	6.99854	6.58053	97.6772	321.178	excision repair cross-complementation group 5
PSMB3	-0.253366	0.500038	0	1	PSMB3_76	pool11	4.3743	8.80526	5.75349	-1.43585	437.689	976.58	proteasome subunit beta 3
BAX	-0.0896424	1.19246	0	1	BAX_277	pool11	4.37089	8.06796	-0.278315	5.32303	241.704	689.801	BCL2-associated X protein
ABL1	-0.000782434	0.954677	0	1	ABL1_853	pool11	4.36501	5.90689	3.97384	3.21431	16.1591	295.689	ABL proto-oncogene 1, non-receptor tyrosine kinase
MSH3	-0.194363	0.193074	0	1	MSH3_1899	pool12	4.35633	6.65302	-0.62218	7.03816	280.961	741.651	mutS homolog 3
CSNK1D	-0.0332015	0.441772	0	2	CSNK1D_999	pool11	4.35496	7.88889	5.87789	-0.701883	367.213	689.162	casein kinase 1 delta
POLQ	-0.125576	0.71287	0	2	POLQ_6648	pool11	4.35262	8.40273	5.85461	-1.19947	4.526	234.533	polymerase (DNA directed), theta
RPA2	-0.294307	0.127902	1	1	RPA2_545	pool12	4.35184	-0.261012	6.74668	6.56983	332.773	875.182	replication protein A2
DCLRE1B	-0.113453	0.50404	0	1	DCLRE1B_1252	pool11	4.35181	0.486115	6.02788	6.54143	21.9842	494.801	DNA cross-link repair 1B
EYA4	-0.226287	0.144663	1	1	EYA4_4298	pool12	4.35136	-0.403822	7.0212	6.43672	898.415	2251.7	EYA transcriptional coactivator and phosphatase 4
PSMA2	-0.153725	1.51004	0	3	PSMA2_783	pool11	4.3475	5.88186	5.79656	1.36409	165.778	1260.34	proteasome subunit alpha 2
TMEM161A	-0.167683	0.509199	0	1	TMEM161A_1125	pool11	4.34224	6.4734	5.65659	0.896731	32.3729	255.468	transmembrane protein 161A
RAD1	-0.19627	0.313006	0	1	RAD1_654	pool12	4.34001	-0.856384	6.78655	7.08987	415.991	965.363	RAD1 checkpoint DNA exonuclease
HMGN1	-0.0896424	1.15428	1	3	HMGN1_846	pool11	4.33663	6.7098	5.16866	1.13143	52.2669	362.788	high mobility group nucleosome binding domain 1
MMS19	-0.212185	0.75721	0	1	MMS19_2540	pool13	4.33172	6.7834	0.103188	6.10858	0.415032	75.9604	MMS19 homolog, cytosolic iron-sulfur assembly component
SPATA18	-0.143573	1.39254	1	1	SPATA18_3418	pool13	4.3278	7.21243	5.21405	0.556913	0.248202	78.8662	spermatogenesis associated 18
TOP2A	-0.153045	1.04048	1	1	TOP2A_3446	pool11	4.32719	3.6723	4.09429	5.21497	17.1016	397.712	topoisomerase (DNA) II alpha
HMGB2	-0.013094	1.22403	0	2	HMGB2_94	pool11	4.32078	5.97728	1.99631	4.98874	41.614	264.936	high mobility group box 2
EP300	-0.262728	0.238222	0	1	EP300_517	pool12	4.32012	8.11041	5.41269	-0.562732	0.96386	186.532	E1A binding protein p300
SMC5	-0.0109063	0.585528	0	1	SMC5_3497	pool11	4.31167	3.36519	2.97258	6.59723	34.5322	594.255	structural maintenance of chromosomes 5
UBB	-0.231362	0.315424	0	1	UBB_935	pool13	4.29294	0.453535	6.37294	6.05235	212.773	942.479	ubiquitin B
CD74	-0.073709	0.544242	1	1	CD74_1097	pool11	4.28757	2.32774	4.59766	5.9373	17.1532	386.354	CD74 molecule
H2AFX	-0.00983881	0.838932	0	2	H2AFX_1435	pool12	4.28526	4.17225	3.50543	5.17811	3.72471	87.5364	H2A histone family member X
PSMB7	-0.231288	0.176395	1	2	PSMB7_818	pool12	4.28151	1.32747	5.10669	6.41036	67.6421	341.479	proteasome subunit beta 7
PSMD4	0	1.2815	1	1	PSMD4_151	pool13	4.28105	4.5423	2.89746	5.40339	0.721123	43.5557	proteasome 26S subunit, non-ATPase 4
UBE2D3	-0.144966	1.08566	0	2	UBE2D3_1668	pool11	4.2798	7.19028	-1.7314	7.38053	131.674	389.009	ubiquitin conjugating enzyme E2D 3
POLR2H	-0.022185	1.25806	0	4	POLR2H_198	pool11	4.2792	7.41081	6.3906	-0.963797	4.48708	318.46	polymerase (RNA) II (DNA directed) polypeptide H
PRKDC	-0.259085	0.1926	0	1	PRKDC_6843	pool11	4.27309	7.41271	4.96746	0.439107	482.308	1076.34	protein kinase, DNA-activated, catalytic polypeptide
AEN	-0.165706	0.515985	0	1	AEN_542	pool11	4.2723	2.0245	6.68956	4.10285	13.3955	296.886	apoptosis enhancing nuclease
MLH3	-0.033014	0.850473	0	2	MLH3_646	pool12	4.26464	2.02758	7.40664	3.3597	46.4181	580.229	mutL homolog 3
SUPT16H	-0.564793	0.484656	1	1	SUPT16H_3249	pool13	4.263	1.74538	5.16239	5.88123	30.7058	217.679	SPT16 homolog, facilitates chromatin remodeling subunit
RECQL4	-0.0534986	1.22695	1	3	RECQL4_3772	pool11	4.26038	6.2317	6.02213	0.527299	57.8246	198.147	RecQ like helicase 4
TRIP12	-0.022505	0.777804	0	1	TRIP12_2450	pool12	4.25671	5.11329	3.32449	4.33236	0.307592	25.3325	thyroid hormone receptor interactor 12
EPHA2	-0.00935041	1.36452	0	1	EPHA2_734	pool11	4.25651	6.75971	5.34115	0.668662	3.38392	186.949	EPH receptor A2
RECQL	-0.0297926	0.743042	0	1	RECQL_710	pool11	4.25336	-0.149812	5.66986	7.24002	222.827	683.064	RecQ like helicase
USP28	-0.12436	0.424581	1	2	USP28_788	pool12	4.24895	0.317126	6.92886	5.50087	69.385	236.868	ubiquitin specific peptidase 28
C16orf5	-0.498941	0.461426	0	1	C16orf5_2330	pool13	4.24834	0.632144	5.89296	6.21991	216.506	685.661
DYRK2	-0.188961	0.38563	1	3	DYRK2_2562	pool12	4.24644	-0.140465	6.06691	6.81289	787.233	1998.25	dual specificity tyrosine phosphorylation regulated kinase 2
CDKN1B	-0.201211	0.272052	0	2	CDKN1B_942	pool12	4.24525	-0.624207	6.82801	6.53193	114.942	464.174	cyclin-dependent kinase inhibitor 1B (p27, Kip1)
MACROD1	-0.0213631	0.798876	0	1	MACROD1_546	pool12	4.24502	-0.307578	7.38579	5.65685	201.084	547.285	MACRO domain containing 1
PSMC6	-0.422393	0.958213	0	2	PSMC6_1244	pool13	4.24395	6.12911	-0.0572235	6.65995	0.328504	80.9102	proteasome 26S subunit, ATPase 6
RAD50	-0.164373	0.374996	1	2	RAD50_6549	pool12	4.24337	-1.05068	6.9838	6.79697	655.537	1655.13	RAD50 double strand break repair protein
MDC1	-0.00833099	0.785686	0	2	MDC1_3049	pool12	4.23859	0.280932	6.26479	6.17005	168.894	538.774	mediator of DNA damage checkpoint 1
C1orf124	-0.275069	0.161214	0	2	C1orf124_2508	pool12	4.23395	0.252244	6.68714	5.76248	218.184	613.567
USP3	-0.0540393	0.741602	0	2	USP3_2131	pool11	4.23098	8.65723	-1.87791	5.91363	383.519	507.074	ubiquitin specific peptidase 3
FGF10	-0.297742	0.43368	0	1	FGF10_200	pool13	4.22892	5.93993	4.4659	2.28092	15.3597	296.879	fibroblast growth factor 10
RUVBL1	-0.209433	0.426085	1	2	RUVBL1_1673	pool11	4.22646	7.01185	5.94722	-0.279686	1.71992	136.027	RuvB like AAA ATPase 1
POLR2F	-0.327717	-0.0323116	0	1	POLR2F_1451	pool12	4.22324	-0.0310754	6.33967	6.36113	89.3511	398.618	polymerase (RNA) II (DNA directed) polypeptide F
CTLA4	-0.423313	0.288361	0	1	CTLA4_868	pool13	4.22195	0.32776	7.00076	5.33734	17.4253	316.215	cytotoxic T-lymphocyte associated protein 4
MCM7	-0.00784429	0.760951	0	3	MCM7_16	pool11	4.22033	7.60372	-1.12727	6.18454	908.781	896.518	minichromosome maintenance complex component 7
PSMD5	-0.572352	-0.147093	1	1	PSMD5_2705	pool12	4.21917	-0.536587	6.81005	6.38404	228.579	688.911	proteasome 26S subunit, non-ATPase 5
MORF4L2	-0.229811	0.24382	0	1	MORF4L2_251	pool12	4.21847	1.38693	6.06873	5.19976	24.3851	143.761	mortality factor 4 like 2
PSMD6	-0.022185	1.27654	0	1	PSMD6_434	pool13	4.21148	6.74244	6.46143	-0.569442	0.842163	125.82	proteasome 26S subunit, non-ATPase 6
NONO	-0.0937727	0.453828	0	2	NONO_2854	pool11	4.21075	0.902654	5.77939	5.95022	124.318	776.23	non-POU domain containing, octamer-binding
CDC14B	-0.855426	-0.875496	2	1	CDC14B_1252	pool12	4.208	-0.0966426	6.46681	6.25383	106.059	328.175	cell division cycle 14B
NUDT1	-0.198528	0.427128	1	1	NUDT1_415	pool11	4.19931	5.01254	6.35573	1.22966	0.486155	41.9589	nudix hydrolase 1
INTS3	-0.390939	0.145876	0	1	INTS3_2546	pool12	4.19877	1.57059	4.97659	6.04913	12.741	150.038	integrator complex subunit 3
E2F7	-0.706859	-0.23381	2	1	E2F7_288	pool12	4.19163	0.362749	6.44982	5.76232	418.695	1008.79	E2F transcription factor 7
USP10	-0.452471	0.470313	0	1	USP10_3101	pool13	4.18902	1.18388	4.8539	6.52929	45.9483	262.099	ubiquitin specific peptidase 10
CLU	-1.09098	-0.713319	2	1	CLU_155	pool12	4.18855	-0.711997	6.6659	6.61173	490.326	922.827	clusterin
UIMC1	-0.155336	0.292345	1	2	UIMC1_189	pool11	4.18722	7.80639	5.6534	-0.898124	274.63	560.694	ubiquitin interaction motif containing 1
CCNG1	-0.186619	0.613144	0	1	CCNG1_571	pool11	4.18569	2.75908	4.70028	5.09772	14.4101	218.032	cyclin G1
ATXN3	-0.500313	1.48545	1	1	ATXN3_1197	pool13	4.17681	3.61336	6.38912	2.52793	6.25302	239.459	ataxin 3
UBE2D3	-0.144966	1.08566	0	2	UBE2D3_1105	pool11	4.17636	4.51043	5.6685	2.35016	62.2456	653.332	ubiquitin conjugating enzyme E2D 3
MRPS26	-0.0335297	0.200315	0	1	MRPS26_938	pool12	4.17056	4.25951	3.38527	4.86689	2.33526	61.5992	mitochondrial ribosomal protein S26
UNG	-0.000477987	4	0	3	UNG_864	pool11	4.17012	6.31091	-0.197174	6.39661	0.283978	68.3461	uracil DNA glycosylase
PHLDA3	-0.0874591	0.355758	0	2	PHLDA3_782	pool12	4.16797	1.27939	6.24465	4.97987	52.1678	278.699	pleckstrin homology like domain family A member 3
PHLDA3	-0.0874591	0.355758	0	2	PHLDA3_683	pool12	4.16788	0.259633	7.19967	5.04433	136.735	435.035	pleckstrin homology like domain family A member 3
PSMB4	-0.0874591	0.360613	0	2	PSMB4_762	pool11	4.1643	8.39747	5.53572	-1.44031	295.281	552.301	proteasome subunit beta 4
OBFC2B	-0.203981	0.27556	0	1	OBFC2B_1264	pool12	4.15659	0.309053	5.27319	6.88752	89.6126	247.624
PLK3	-0.0462403	1.35067	0	2	PLK3_1601	pool11	4.15565	5.59823	-0.694953	7.56367	3.67489	350.541	polo like kinase 3
MAPK14	-0.236497	0.295078	0	2	MAPK14_692	pool12	4.15381	2.27488	6.82415	3.36239	38.232	372.574	mitogen-activated protein kinase 14
BCL6	-0.0973445	0.928486	1	2	BCL6_2249	pool11	4.1522	5.24719	4.9086	2.30079	22.0933	151.006	B-cell CLL/lymphoma 6
BAG6	-0.287687	0.277448	1	2	BAG6_918	pool12	4.15172	-0.0855806	6.59981	5.94095	104.032	303.44	BCL2 associated athanogene 6
XRCC3	-0.190373	0.323855	1	2	XRCC3_357	pool12	4.15158	1.24839	5.84226	5.36407	71.5482	345.278	X-ray repair complementing defective repair in Chinese hamster cells 3
MDM2	-0.339799	0.220837	1	2	MDM2_618	pool12	4.15053	-0.958824	6.76742	6.643	46.3219	229.322	MDM2 proto-oncogene, E3 ubiquitin protein ligase
XRCC3	-0.190373	0.323855	1	2	XRCC3_893	pool12	4.14496	-0.517807	5.85441	7.09827	71.5743	235.21	X-ray repair complementing defective repair in Chinese hamster cells 3
IRF7	-0.0594835	1.18177	1	2	IRF7_1325	pool11	4.14338	7.46037	-1.82717	6.79693	32.9473	319.595	interferon regulatory factor 7
SPDYA	-0.327625	0.10386	0	1	SPDYA_126	pool12	4.14143	0.339441	6.33619	5.74865	107.704	253.512	speedy/RINGO cell cycle regulator family member A
PHF1	-0.142426	1.5817	0	1	PHF1_2146	pool13	4.13908	1.94043	5.60913	4.86768	7.49719	158.172	PHD finger protein 1
PSMD7	-0.569441	-0.0791986	1	1	PSMD7_370	pool12	4.13058	0.199745	5.87751	6.3145	174.221	738.586	proteasome 26S subunit, non-ATPase 7
PSME4	-0.00449643	0.932557	0	2	PSME4_2146	pool11	4.13023	3.62736	3.94653	4.8168	21.7081	384.011	proteasome activator subunit 4
PLK3	-0.0462403	1.35067	0	2	PLK3_1496	pool11	4.12852	8.42236	4.06468	-0.101494	1.08916	133.805	polo like kinase 3
USP16	-0.408713	-0.0320778	1	1	USP16_1428	pool12	4.12781	-1.29767	6.92719	6.7539	104.899	188.455	ubiquitin specific peptidase 16
RAD54B	-0.291154	0.313811	0	1	RAD54B_1267	pool12	4.12606	-0.285916	6.56717	6.09693	8.11568	143.994	RAD54 homolog B (S. cerevisiae)
POLR2J	-0.0238335	0.955068	0	1	POLR2J_641	pool11	4.12126	2.00925	3.49952	6.85502	3.79209	181.276	polymerase (RNA) II (DNA directed) polypeptide J, 13.3kDa
CUL4B	-0.094906	0.413638	0	0	CUL4B_1441	pool11	4.12083	5.94605	-0.500811	6.91724	152.432	590.132	cullin 4B
APEX2	-0.147398	0.650722	1	2	APEX2_1887	pool11	4.11963	7.68088	6.26154	-1.58353	90.1417	556.172	APEX nuclease (apurinic/apyrimidinic endonuclease) 2
RFC4	-0.181378	0.205721	1	0	RFC4_112	pool11	4.11842	6.47714	4.5694	1.30871	133.008	391.489	replication factor C subunit 4
MNDA	-0.127494	0.888401	0	1	MNDA_1119	pool11	4.11725	5.82936	-0.499479	7.02187	5.03462	452.263	myeloid cell nuclear differentiation antigen
POLD2	-0.00296329	1.1549	0	1	POLD2_495	pool11	4.11626	0.568645	6.26878	5.51134	8.14349	125.419	polymerase (DNA directed), delta 2, accessory subunit
BAZ1B	-0.90309	0.487182	0	0	BAZ1B_3381	pool13	4.11527	-0.129509	6.87096	5.60437	335.527	728.645	bromodomain adjacent to zinc finger domain 1B
RAD51L1	-0.145148	0.229516	0	0	RAD51L1_733	pool12	4.11042	4.42444	1.37629	6.53053	21.0052	238.493
AP5S1	-0.152242	0.390086	0	0	AP5S1_1455	pool12	4.10742	1.31481	7.08594	3.9215	26.7575	149.647	adaptor related protein complex 5 sigma 1 subunit
UIMC1	-0.155336	0.292345	1	2	UIMC1_1315	pool11	4.10112	7.40747	5.19048	-0.294595	0.904684	95.5495	ubiquitin interaction motif containing 1
HMOX1	-0.042297	1.29671	0	2	HMOX1_333	pool11	4.0979	0.0967117	6.52338	5.6736	76.6458	202.739	heme oxygenase 1
LIG1	-0.145937	0.2522	1	1	LIG1_2812	pool11	4.09374	0.276396	5.08251	6.92232	54.5467	300.773	ligase I, DNA, ATP-dependent
POLR2D	-0.124187	1.73993	1	1	POLR2D_1498	pool11	4.0933	7.75121	5.25688	-0.728188	300.895	443.653	polymerase (RNA) II (DNA directed) polypeptide D
RAD21	-0.185886	1.0575	0	0	RAD21_1944	pool13	4.09191	3.99776	5.59764	2.68033	22.407	426.734	RAD21 cohesin complex component
CINP	-0.365221	0.0382468	0	0	CINP_77	pool12	4.09088	0.0415276	6.70591	5.5252	93.943	268.491	cyclin-dependent kinase 2 interacting protein
PNKP	-0.266482	0.0272882	0	0	PNKP_744	pool12	4.09064	-0.258223	6.96021	5.56992	172.85	288.968	polynucleotide kinase 3'-phosphatase
UBR5	-0.0106392	0.795609	0	2	UBR5_1959	pool11	4.08979	6.87842	5.66536	-0.274411	211.058	790.555	ubiquitin protein ligase E3 component n-recognin 5
EEPD1	-0.188224	0.299729	0	1	EEPD1_1524	pool12	4.08761	2.0936	3.93561	6.23362	64.3154	631.523	endonuclease/exonuclease/phosphatase family domain containing 1
PSMD8	-0.232028	0.291239	0	0	PSMD8_713	pool12	4.08663	0.523311	5.96056	5.77602	76.2853	270.591	proteasome 26S subunit, non-ATPase 8
H2AFX	-0.00983881	0.838932	0	2	H2AFX_20	pool12	4.08281	6.41075	6.18039	-0.342725	0.451116	73.664	H2A histone family member X
POLR2L	-0.0713482	0.467118	0	2	POLR2L_378	pool12	4.08175	1.06253	4.5927	6.59	169.428	768.101	polymerase (RNA) II (DNA directed) polypeptide L, 7.6kDa
MBD4	-0.200935	0.882397	0	0	MBD4_1549	pool11	4.07726	4.80106	6.43715	0.993578	42.2727	467.829	methyl-CpG binding domain 4 DNA glycosylase
C19orf39	0	1.93181	0	3	C19orf39_873	pool12	4.07535	0.718554	5.39739	6.11011	94.8231	332.224
BRCA2	-0.227458	0.012736	1	0	BRCA2_9508	pool11	4.07012	8.34893	5.01083	-1.14941	157.481	376.991	breast cancer 2
SMC5	-0.0109063	0.585528	0	1	SMC5_1136	pool11	4.06861	0.341106	5.32839	6.53634	47.3596	300.41	structural maintenance of chromosomes 5
EME1	-0.129596	0.328642	0	0	EME1_626	pool12	4.06672	-0.063008	7.55072	4.71243	32.2426	185.032	essential meiotic structure-specific endonuclease 1
CASP9	-0.416348	0.0247061	0	0	CASP9_1279	pool12	4.06378	-0.628532	5.22281	7.59707	100.735	199.327	caspase 9
PLK1	-0.583692	0.0904975	2	0	PLK1_291	pool11	4.06306	7.16603	5.66201	-0.638855	1.8867	140.163	polo like kinase 1
EXO1	-0.194092	0.452964	0	0	EXO1_986	pool11	4.06265	1.36384	5.64336	5.18075	44.9654	356.961	exonuclease 1
SETD8	-0.256725	0.214101	0	0	SETD8_254	pool12	4.05804	2.07915	3.88526	6.2097	57.4918	319.321
PAXIP1	-0.159706	0.863279	0	1	PAXIP1_152	pool11	4.05113	6.54615	6.25721	-0.649954	2.51746	195.629	PAX interacting (with transcription-activation domain) protein 1
RBBP5	-1.31515	1.3363	0	0	RBBP5_4120	pool12	4.04856	4.99831	6.38015	0.767219	22.2901	213.396	retinoblastoma binding protein 5
POLD2	-0.00296329	1.1549	0	1	POLD2_536	pool11	4.04807	5.11699	-0.172328	7.19955	0.777778	131.703	polymerase (DNA directed), delta 2, accessory subunit
INO80E	-0.174639	0.219827	0	0	INO80E_277	pool12	4.04477	-0.0732529	5.84229	6.36528	138.86	239.672	INO80 complex subunit E
RPA1	0	1.38828	1	2	RPA1_915	pool11	4.03891	2.30716	2.94428	6.8653	25.2348	304.33	replication protein A1
MUS81	-0.157017	0.767512	1	0	MUS81_2289	pool11	4.03775	6.17149	2.20954	3.73222	34.0077	300.946	MUS81 structure-specific endonuclease subunit
LYN	-0.0104612	1.78781	0	0	LYN_460	pool11	4.03667	3.01781	3.15038	5.94182	3.51806	120.681	LYN proto-oncogene, Src family tyrosine kinase
PSMB10	-0.195247	0.272866	0	0	PSMB10_958	pool12	4.03029	-1.12732	6.29738	6.92082	153.808	193.932	proteasome subunit beta 10
FBXO6	-0.198734	0.519562	0	0	FBXO6_1282	pool13	4.02783	1.02408	4.48967	6.56973	11.8538	98.2326	F-box protein 6
RAD9B	-0.609949	0.0587868	0	0	RAD9B_198	pool12	4.02626	0.193369	5.92208	5.96334	127.496	341.949	RAD9 checkpoint clamp component B
TREX2	-1.35952	0.302771	2	0	TREX2_533	pool13	4.02457	3.36025	6.74018	1.97328	23.4172	431.394	three prime repair exonuclease 2
PSMC1	-0.0144837	1.00261	0	0	PSMC1_91	pool13	4.02009	-1.00528	6.91101	6.15453	34.4036	286.565	proteasome 26S subunit, ATPase 1
POLD1	-0.00230788	1.40671	0	0	POLD1_349	pool11	4.01811	1.16287	4.924	5.96745	66.8142	214.048	polymerase (DNA directed), delta 1, catalytic subunit
PMS1	-0.333201	0.0336236	0	0	PMS1_717	pool12	4.00939	1.72955	6.2397	4.05891	25.2104	483.287	PMS1 homolog 1, mismatch repair system component
UHRF1	-0.0184985	0.796152	0	1	UHRF1_2005	pool12	4.00369	1.32921	6.97705	3.70483	87.7962	446.143	ubiquitin-like with PHD and ring finger domains 1
CSNK1E	-0.741363	-0.184821	0	0	CSNK1E_699	pool12	4.00076	3.82168	3.24319	4.93741	21.4575	265.457	casein kinase 1 epsilon
CCNG1	-0.186619	0.613144	0	1	CCNG1_209	pool11	3.99962	7.57873	1.91247	2.50765	71.6813	378.813	cyclin G1
PSMB6	-0.344381	-0.160208	0	0	PSMB6_544	pool12	3.99529	2.116	4.75608	5.11379	31.7783	347.462	proteasome subunit beta 6
BTG2	-0.217527	0.169475	0	1	BTG2_678	pool12	3.99295	-0.178788	6.56478	5.59287	232.564	688.139	BTG family member 2
MUS81	-0.157017	0.767512	1	0	MUS81_1965	pool11	3.98944	8.14147	-2.3944	6.22124	2047.55	1236.45	MUS81 structure-specific endonuclease subunit
PSMA6	-0.0443122	0.800245	0	2	PSMA6_437	pool12	3.9872	-0.482154	6.1886	6.25515	119.567	347.999	proteasome subunit alpha 6
NFRKB	-0.262171	0.196338	0	0	NFRKB_3873	pool12	3.97923	2.57817	3.76596	5.59356	46.9446	461.909	nuclear factor related to kappaB binding protein
POLH	-0.272866	0.510604	1	1	POLH_943	pool12	3.97664	2.01317	3.0738	6.84295	45.7218	518.689	polymerase (DNA directed), eta
EYA4	-0.226287	0.144663	1	1	EYA4_1851	pool12	3.97653	0.523467	5.82829	5.57785	163.706	541.208	EYA transcriptional coactivator and phosphatase 4
PLA2R1	-0.497983	0.0954467	1	0	PLA2R1_2610	pool13	3.97205	1.36619	6.55615	3.9938	18.8495	175.729	phospholipase A2 receptor 1
HERC2	0	1.07058	0	1	HERC2_3645	pool13	3.97103	1.39494	5.4614	5.05673	5.7203	70.9879	HECT and RLD domain containing E3 ubiquitin protein ligase 2
SNW1	-1.36251	-2.24413	2	0	SNW1_619	pool12	3.96744	-1.63292	7.33205	6.20318	435.794	523.939	SNW domain containing 1
MDC1	-0.00833099	0.785686	0	2	MDC1_5940	pool12	3.96684	0.981264	5.26537	5.65389	50.8445	169.15	mediator of DNA damage checkpoint 1
TFDP3	-0.297483	0.430041	1	0	TFDP3_703	pool13	3.96619	0.630567	5.53015	5.73787	82.0747	267.583	transcription factor Dp family member 3
XAB2	-0.0825995	0.730954	0	1	XAB2_903	pool12	3.95467	-0.511491	6.12128	6.25422	49.8431	212.914	XPA binding protein 2
HMGB2	-0.013094	1.22403	0	2	HMGB2_635	pool11	3.95366	5.81944	0.204935	5.8366	0.154662	46.0953	high mobility group box 2
MCRS1	0	1.04624	0	1	MCRS1_143	pool12	3.95285	-0.198866	6.0719	5.98552	145.176	352.83	microspherule protein 1
USP1	-0.0369681	0.775208	0	0	USP1_960	pool11	3.94725	5.16898	5.78671	0.886057	57.913	252.453	ubiquitin specific peptidase 1
PARP3	-0.0959339	0.856673	0	1	PARP3_721	pool11	3.9458	4.64209	3.9065	3.28881	100.797	1282.28	poly(ADP-ribose) polymerase family member 3
CCND1	-0.347174	-0.0440718	1	0	CCND1_1365	pool11	3.94186	8.10227	1.48024	2.24306	123.317	538.796	cyclin D1
ASF1A	-0.330683	-0.0829148	0	0	ASF1A_909	pool12	3.94141	-0.722848	7.05253	5.49455	742.514	1423.98	anti-silencing function 1A histone chaperone
TMEM109	-0.247337	0.339419	0	0	TMEM109_2271	pool12	3.93539	-1.18311	5.94579	7.0435	192.13	317.558	transmembrane protein 109
LYN	-0.0104612	1.78781	0	0	LYN_2266	pool11	3.93515	7.04748	5.09172	-0.333743	5.9466	374.647	LYN proto-oncogene, Src family tyrosine kinase
IKBKE	-0.143452	0.456926	1	0	IKBKE_2110	pool11	3.93422	0.18017	5.30785	6.31464	15.6231	294.387	inhibitor of kappa light polypeptide gene enhancer in B-cells, kinase epsilon
RFC4	-0.181378	0.205721	1	0	RFC4_854	pool11	3.92903	7.63345	1.0148	3.13884	145.345	417.343	replication factor C subunit 4
USP28	-0.12436	0.424581	1	2	USP28_3474	pool12	3.91063	0.194013	5.26833	6.26956	98.3929	203.133	ubiquitin specific peptidase 28
ING4	-0.234182	0.0609802	1	0	ING4_319	pool12	3.90987	-0.966865	6.68278	6.01371	975.974	1331.23	inhibitor of growth family member 4
CD74	-0.073709	0.544242	1	1	CD74_672	pool11	3.90759	7.14621	4.27619	0.300365	26.4516	103.521	CD74 molecule
MCM7	-0.00784429	0.760951	0	3	MCM7_1879	pool11	3.90613	6.4659	5.72898	-0.476489	272.847	487.918	minichromosome maintenance complex component 7
NSMCE1	-0.209363	0.270997	0	1	NSMCE1_510	pool12	3.90108	-0.671176	6.1594	6.21502	94.8456	400.932	NSE1 homolog, SMC5-SMC6 complex component
MSH3	-0.194363	0.193074	0	1	MSH3_1116	pool12	3.89889	-1.22982	6.80497	6.12152	331.745	381.196	mutS homolog 3
PSMC1	-0.0144837	1.00261	0	0	PSMC1_562	pool13	3.89856	6.74538	6.04457	-1.09429	143.954	208.453	proteasome 26S subunit, ATPase 1
LIG3	0	0.957818	0	2	LIG3_2407	pool12	3.89687	2.79771	3.51448	5.37844	24.9565	257.805	ligase III, DNA, ATP-dependent
RAD23A	-0.278519	0.358427	1	0	RAD23A_900	pool13	3.881	4.04346	2.25938	5.34015	9.88809	174.455	RAD23 homolog A, nucleotide excision repair protein
TFPT	-0.392652	0.0859214	1	0	TFPT_342	pool13	3.87093	-0.188731	5.80362	5.99791	109.533	226.681	TCF3 (E2A) fusion partner (in childhood Leukemia)
LRDD	0	0.886725	0	3	LRDD_2946	pool12	3.86752	-1.29772	6.35497	6.54531	782.639	717.975
MAPK12	-0.0454198	1.00966	0	0	MAPK12_1170	pool13	3.86631	0.879827	5.40235	5.31676	66.1133	493.249	mitogen-activated protein kinase 12
NUDT1	-0.198528	0.427128	1	1	NUDT1_576	pool11	3.86232	-0.538108	6.01483	6.11025	29.0945	296.729	nudix hydrolase 1
RFWD2	-0.237772	0.100672	0	0	RFWD2_2263	pool12	3.86194	0.749002	4.08312	6.75372	120.484	441.655	ring finger and WD repeat domain 2, E3 ubiquitin protein ligase
ASCC3	-0.125634	0.323855	1	1	ASCC3_310	pool11	3.86002	-1.09961	5.62363	7.05602	721.23	1181.1	activating signal cointegrator 1 complex subunit 3
CIB1	-0.200246	0.175809	0	0	CIB1_444	pool11	3.85871	7.67337	5.4654	-1.56264	109.123	292.405	calcium and integrin binding 1
MRE11A	-0.573326	0.120388	0	0	MRE11A_712	pool12	3.85675	-0.569155	6.83917	5.30023	560.598	840.154	MRE11 homolog A, double strand break repair nuclease
SETX	-0.236647	0.152551	0	0	SETX_2486	pool12	3.85659	-0.850122	7.34117	5.07873	132.466	281.391	senataxin
MSH3	-0.194363	0.193074	0	1	MSH3_2394	pool12	3.85593	2.98507	2.11957	6.46316	56.4705	458.64	mutS homolog 3
ATM	-0.65738	0.675306	1	1	ATM_12581	pool12	3.85394	0.17448	6.42534	4.96199	207.974	552.018	ATM serine/threonine kinase
RTEL1	-0.204746	0.26496	0	0	RTEL1_1341	pool12	3.84717	-1.33561	6.28793	6.58919	107.366	182.729	regulator of telomere elongation helicase 1
RBM14	-0.485585	-0.032031	2	0	RBM14_1315	pool12	3.84492	-0.835771	6.42196	5.94858	739.383	922.568	RNA binding motif protein 14
POLA1	-0.0167346	2.25181	1	2	POLA1_1642	pool11	3.84451	5.97642	3.74737	1.80973	3.69418	40.7102	polymerase (DNA directed), alpha 1, catalytic subunit
TMEM161A	-0.167683	0.509199	0	1	TMEM161A_132	pool11	3.84324	5.90462	3.72297	1.90212	90.273	395.037	transmembrane protein 161A
CINP	-0.365221	0.0382468	0	0	CINP_76	pool12	3.8362	8.13902	-3.06041	6.43	423.632	311.613	cyclin-dependent kinase 2 interacting protein
C19orf40	-0.345342	0.142909	1	0	C19orf40_617	pool12	3.83511	-1.2899	5.97281	6.82242	82.023	219.059
MYC	-0.0639389	1.29243	0	2	MYC_1742	pool11	3.83461	1.31921	6.08641	4.09822	52.0849	473.551	v-myc avian myelocytomatosis viral oncogene homolog
UACA	-0.573164	0.0151578	1	1	UACA_3542	pool12	3.83145	1.87061	5.7114	3.91236	58.8988	288.544	uveal autoantigen with coiled-coil domains and ankyrin repeats
CDC14B	-0.855426	-0.875496	2	1	CDC14B_4787	pool12	3.82596	-0.177896	5.29437	6.36139	246.247	394.844	cell division cycle 14B
ALKBH2	-0.280337	0.135489	0	1	ALKBH2_111	pool12	3.82492	-0.286517	5.88537	5.87589	119.832	482.78	alkB homolog 2, alpha-ketoglutarate-dependent dioxygenase
XIAP	-0.0956632	0.61261	0	0	XIAP_2006	pool13	3.82168	-0.292973	6.83968	4.91833	53.8866	546.476	X-linked inhibitor of apoptosis
SMG1	-0.33208	0.210349	0	0	SMG1_1653	pool12	3.82041	-0.935203	6.40105	5.99538	144.814	173.549	SMG1 phosphatidylinositol 3-kinase-related kinase
SIRT6	-0.166853	-0.0574959	0	0	SIRT6_1525	pool12	3.81453	-0.275618	6.54584	5.17337	56.9006	124.988	sirtuin 6
PPP2R5C	-0.795337	-0.14917	0	0	PPP2R5C_623	pool12	3.81226	-0.895812	6.76196	5.57064	231.985	408.134	protein phosphatase 2 regulatory subunit B', gamma
LIG3	0	0.957818	0	2	LIG3_2011	pool12	3.81194	1.87585	5.54415	4.01582	32.5585	265.275	ligase III, DNA, ATP-dependent
APLF	-0.479124	-0.0916759	2	0	APLF_952	pool12	3.81127	0.710885	4.62754	6.09538	141.688	582.087	aprataxin and PNKP like factor
SOX4	-0.157079	0.721018	0	1	SOX4_4497	pool11	3.80992	7.80091	3.22618	0.402683	1.0517	105.507	SRY-box 4
PMAIP1	-0.26544	0.04072	0	0	PMAIP1_1106	pool11	3.80472	2.11626	2.12919	7.16871	76.2669	662.038	phorbol-12-myristate-13-acetate-induced protein 1
PSMD4	0	1.2815	1	1	PSMD4_280	pool13	3.80294	7.96813	-0.124397	3.56507	0.259587	86.958	proteasome 26S subunit, non-ATPase 4
CD74	-0.073709	0.544242	1	1	CD74_76	pool11	3.80156	0.305086	5.64782	5.45176	59.7835	289.529	CD74 molecule
PSMD2	-0.0897492	0.471083	0	1	PSMD2_792	pool12	3.79888	4.59753	7.51998	-0.720886	1.05603	164.548	proteasome 26S subunit, non-ATPase 2
MUC1	-0.0125572	0.802168	0	2	MUC1_409	pool12	3.79537	0.0628633	5.58941	5.73384	350.441	531.742	mucin 1, cell surface associated
NDNL2	-0.234331	0.269379	0	1	NDNL2_100	pool12	3.78688	1.30215	2.81371	7.24477	67.0528	659.401
TERF2IP	-0.0870344	0.826814	0	0	TERF2IP_1961	pool13	3.78537	0.100038	5.7417	5.51438	126.866	261.371	telomeric repeat binding factor 2, interacting protein
PPP4C	0	1.1831	1	2	PPP4C_1228	pool11	3.78288	0.428352	6.2195	4.70079	56.2755	188.781	protein phosphatase 4 catalytic subunit
FANCC	-0.720561	-0.333857	2	0	FANCC_568	pool12	3.77513	-1.63317	6.50488	6.45368	425.77	506.125	Fanconi anemia complementation group C
BCL6	-0.0973445	0.928486	1	2	BCL6_859	pool11	3.77379	1.54639	5.73073	4.04425	45.2799	240.155	B-cell CLL/lymphoma 6
PRMT6	-0.466101	-0.0156527	0	0	PRMT6_204	pool12	3.77361	-1.89513	5.86416	7.35179	357.5	725.749	protein arginine methyltransferase 6
POLD2	-0.00296329	1.1549	0	1	POLD2_1591	pool11	3.76714	-0.0684396	4.54052	6.82935	19.3374	294.234	polymerase (DNA directed), delta 2, accessory subunit
APEX1	-0.254769	0.721246	0	0	APEX1_489	pool11	3.76524	6.50443	5.34121	-0.549901	1.21083	95.9235	APEX nuclease (multifunctional DNA repair enzyme) 1
ALKBH8	-0.226214	0.261933	0	0	ALKBH8_1082	pool12	3.76248	2.20383	2.83423	6.24937	31.1347	328.66	alkB homolog 8, tRNA methyltransferase
RIF1	-0.102098	0.743763	0	1	RIF1_8793	pool12	3.75849	1.98686	7.38246	1.90614	17.8979	210.01	replication timing regulatory factor 1
FOXN3	-0.484789	0.0654006	2	1	FOXN3_592	pool12	3.75046	1.3522	3.91097	5.98821	223.153	1143.94	forkhead box N3
ZAK	-0.248336	0.109914	0	0	ZAK_34	pool12	3.74648	-0.00911279	5.2914	5.95716	207.222	382.089
RPA2	-0.294307	0.127902	1	1	RPA2_1413	pool12	3.74588	5.54816	-0.789181	6.47867	281.449	520.677	replication protein A2
MEIR5	-0.756962	0.445148	0	0	MEIR5_853	pool13	3.74373	0.478532	6.25227	4.50038	100.393	397.776
LRDD	0	0.886725	0	3	LRDD_2215	pool12	3.74202	1.2079	6.44392	3.57425	81.0336	361.871
MRPS26	-0.0335297	0.200315	0	1	MRPS26_733	pool12	3.73076	2.34667	3.78349	5.06213	10.703	78.4452	mitochondrial ribosomal protein S26
TAF9	-0.937794	0.146241	1	0	TAF9_549	pool13	3.72043	3.29918	5.54196	2.32014	16.7766	230.999	TATA-box binding protein associated factor 9
STK11	-0.225483	0.313811	0	1	STK11_1449	pool12	3.71677	-1.17464	6.70416	5.6208	115.124	234.294	serine/threonine kinase 11
MCRS1	0	1.04624	0	1	MCRS1_1667	pool12	3.71581	1.58662	6.91739	2.64343	68.5974	505.711	microspherule protein 1
MIF	-0.268653	0.0142593	0	0	MIF_372	pool11	3.71573	3.01556	5.51505	2.61656	55.2081	646.435	macrophage migration inhibitory factor (glycosylation-inhibiting factor)
TMEM109	-0.247337	0.339419	0	0	TMEM109_71	pool12	3.71452	-1.23025	6.70312	5.6707	2.53903	101.65	transmembrane protein 109
MASTL	-0.649171	-0.175809	1	0	MASTL_1358	pool12	3.71367	-0.888166	6.08428	5.9449	266.74	314.697	microtubule associated serine/threonine kinase like
MSH6	-0.146606	0.216597	1	1	MSH6_2570	pool11	3.71366	0.0334452	3.51577	7.59178	155.34	456.832	mutS homolog 6
TEX15	-0.425737	0.837734	0	0	TEX15_4961	pool13	3.71267	3.80481	6.29932	1.03387	108.505	708.446	testis expressed 15
RECQL4	-0.0534986	1.22695	1	3	RECQL4_1337	pool11	3.7074	4.75302	-0.402109	6.77128	0.184477	53.1804	RecQ like helicase 4
ACTR5	-0.379032	-0.129245	1	0	ACTR5_625	pool12	3.70152	-2.41492	6.97626	6.54322	171.734	151.475	ARP5 actin-related protein 5 homolog (yeast)
PSMB1	-0.278519	0.319664	1	0	PSMB1_466	pool11	3.70035	9.58007	5.45216	-3.93116	685.134	723.567	proteasome subunit beta 1
RINT1	-0.128252	0.578725	0	1	RINT1_1202	pool11	3.69668	8.03466	5.51871	-2.46334	314.392	178.329	RAD50 interactor 1
PSMB5	-0.458795	0.0728864	0	0	PSMB5_209	pool13	3.68551	-0.229665	7.42543	3.86077	104.325	220.631	proteasome subunit beta 5
PSMB1	-0.278519	0.319664	1	0	PSMB1_379	pool11	3.68527	8.99209	2.92832	-0.864605	135.72	363.863	proteasome subunit beta 1
MCL1	-0.00471589	0.798057	0	2	MCL1_3284	pool11	3.68279	7.50377	3.62394	-0.0793471	52.1674	138.581	myeloid cell leukemia 1
APTX	-0.205582	0.318307	0	0	APTX_105	pool12	3.68028	0.385163	4.66871	5.98698	217.022	613.951	aprataxin
EYA2	-0.15484	0.779369	0	1	EYA2_2287	pool11	3.67795	7.17391	3.60462	0.255305	0.321438	55.4958	EYA transcriptional coactivator and phosphatase 2
FANCF	-0.0013484	0.783043	0	2	FANCF_1035	pool11	3.6778	8.36087	-0.68057	3.35309	430.365	465.302	Fanconi anemia complementation group F
IRF3	-0.242225	0.31894	0	0	IRF3_168	pool12	3.67731	7.18697	5.15187	-1.30692	0.635176	64.867	interferon regulatory factor 3
CEBPG	-0.0174574	0.852942	0	2	CEBPG_3538	pool11	3.67441	0.0996433	5.70015	5.22343	852.153	3733.98	CCAAT/enhancer binding protein gamma
PALB2	-0.0608303	1.15366	0	0	PALB2_893	pool11	3.66881	4.97297	6.07329	-0.0398258	358.578	1187.39	partner and localizer of BRCA2
RAD9A	-0.247952	1.29843	0	0	RAD9A_307	pool11	3.66877	6.54424	5.83341	-1.37134	2.08123	132.115	RAD9 checkpoint clamp component A
IKBKE	-0.143452	0.456926	1	0	IKBKE_3211	pool11	3.66395	5.28906	5.77902	-0.0762277	121.278	567.871	inhibitor of kappa light polypeptide gene enhancer in B-cells, kinase epsilon
CCNO	-0.509761	0.186019	2	0	CCNO_1393	pool13	3.65982	-0.372754	6.83197	4.52025	96.7939	317.433	cyclin O
BAX	-0.0896424	1.19246	0	1	BAX_114	pool11	3.65933	7.8758	-0.505126	3.60732	0.583246	83.7786	BCL2-associated X protein
DTL	-0.370081	-0.0185892	2	0	DTL_306	pool11	3.65927	6.45059	5.70376	-1.17655	54.5691	131.43	denticleless E3 ubiquitin protein ligase homolog
EYA3	-0.0820746	0.571541	0	3	EYA3_3811	pool12	3.65832	1.18124	3.45349	6.34024	120.406	534.698	EYA transcriptional coactivator and phosphatase 3
TOPORS	-0.523603	0.636012	0	1	TOPORS_1803	pool12	3.65322	-1.18695	6.52459	5.622	311.026	392.422	topoisomerase I binding, arginine/serine-rich, E3 ubiquitin protein ligase
XRCC1	-0.0085967	1.0752	0	1	XRCC1_1859	pool12	3.65147	1.40752	5.98871	3.55816	15.2991	103.553	X-ray repair complementing defective repair in Chinese hamster cells 1
PSMD2	-0.0897492	0.471083	0	1	PSMD2_890	pool12	3.64995	0.0216796	4.30071	6.62747	153.71	329.945	proteasome 26S subunit, non-ATPase 2
UBE2V1	-0.605899	0.0964217	1	0	UBE2V1_255	pool13	3.64508	0.268987	6.05741	4.60884	20.3096	97.5117	ubiquitin conjugating enzyme E2 variant 1
CIB1	-0.200246	0.175809	0	0	CIB1_446	pool11	3.64215	8.58682	-3.9647	6.30434	947.588	414.466	calcium and integrin binding 1
TOP2A	-0.153045	1.04048	1	1	TOP2A_1196	pool11	3.63246	1.45947	6.3987	3.03921	25.0834	161.827	topoisomerase (DNA) II alpha
PSMD9	-0.111091	0.859492	1	0	PSMD9_1536	pool11	3.63047	6.36478	-0.197174	4.72381	0.383479	54.1067	proteasome 26S subunit, non-ATPase 9
BCL3	-0.227678	0.186152	0	0	BCL3_1792	pool12	3.62743	-1.36452	6.56787	5.67893	267.634	412.107	B-cell CLL/lymphoma 3
MSH2	-0.518128	0.190171	0	0	MSH2_1846	pool13	3.62727	6.91352	-0.186213	4.15451	145.737	194.785	mutS homolog 2
PARP2	-0.418847	0.152427	1	0	PARP2_212	pool13	3.62673	0.823987	4.38728	5.66893	5.07432	41.4413	poly(ADP-ribose) polymerase 2
POLQ	-0.125576	0.71287	0	2	POLQ_7671	pool11	3.6263	6.81492	-0.198844	4.26283	0.949025	66.2781	polymerase (DNA directed), theta
NHEJ1	-0.321391	0.139004	1	0	NHEJ1_2054	pool13	3.62572	0.246613	6.08764	4.54291	81.921	376.436	non-homologous end joining factor 1
PSMD4	0	1.2815	1	1	PSMD4_1177	pool13	3.6256	0.276094	6.16027	4.44045	171.597	468.961	proteasome 26S subunit, non-ATPase 4
ZSWIM7	-0.305044	0.868061	0	0	ZSWIM7_1554	pool13	3.62447	0.452797	5.42322	4.99739	81.7585	190.853	zinc finger SWIM-type containing 7
PSMB8	-0.254223	0.306713	1	1	PSMB8_613	pool11	3.62332	7.04727	5.47505	-1.65235	456.481	549.58	proteasome subunit beta 8
DDB2	-0.00291956	1.10735	0	1	DDB2_1784	pool11	3.62175	0.454552	5.85923	4.55147	56.8691	331.893	damage specific DNA binding protein 2
XRCC4	-0.0485168	0.883724	0	1	XRCC4_1000	pool11	3.62162	2.98132	6.03006	1.85349	33.2183	338.153	X-ray repair complementing defective repair in Chinese hamster cells 4
CDCA5	-0.0721679	0.347077	0	0	CDCA5_461	pool12	3.61438	1.22905	5.46605	4.14803	68.2721	235.687	cell division cycle associated 5
FTO	-0.393726	0.44406	1	0	FTO_3418	pool13	3.60899	1.17566	6.88411	2.7672	67.1335	434.053	fat mass and obesity associated
C1orf86	-1.09691	-0.124939	2	0	C1orf86_33	pool13	3.6083	-0.510252	4.59528	6.73988	60.8705	130.068
INTS3	-0.390939	0.145876	0	1	INTS3_2892	pool12	3.60794	-1.56175	6.577	5.80856	122.725	205.215	integrator complex subunit 3
MCRS1	0	1.04624	0	1	MCRS1_1160	pool12	3.60746	2.43565	5.70451	2.68222	15.1984	132.984	microspherule protein 1
ACTL6A	-0.0386738	0.442493	0	0	ACTL6A_447	pool11	3.60688	8.4932	1.58375	0.743695	591.329	1771.31	actin like 6A
NONO	-0.0937727	0.453828	0	2	NONO_1091	pool11	3.60581	0.0707384	5.91599	4.83071	128.113	432.635	non-POU domain containing, octamer-binding
CDCA5	-0.0721679	0.347077	0	0	CDCA5_1575	pool12	3.59789	4.23207	6.32767	0.233918	0.717619	68.0337	cell division cycle associated 5
CASP9	-0.416348	0.0247061	0	0	CASP9_290	pool12	3.59648	-1.1634	5.35007	6.60276	118.744	218.56	caspase 9
POLE	-0.00322573	0.778847	0	3	POLE_6243	pool12	3.59231	-1.20904	5.05271	6.93326	112.85	218.888	polymerase (DNA directed), epsilon, catalytic subunit
MC1R	-0.0244303	0.504872	2	0	MC1R_3056	pool13	3.59206	7.46134	-2.50651	5.82135	235.732	163.603	melanocortin 1 receptor
CEP164	-0.27417	0.245499	1	1	CEP164_2692	pool11	3.59012	1.81447	6.05687	2.89903	5.99005	95.0412	centrosomal protein 164kDa
PSMD13	-0.1673	2.27572	0	0	PSMD13_1645	pool11	3.58722	7.96767	4.55361	-1.75961	364.147	399.293	proteasome 26S subunit, non-ATPase 13
FOXO1	-0.286593	-0.0303512	0	1	FOXO1_2313	pool12	3.58434	-2.35685	6.53908	6.5708	462.51	397.547	forkhead box O1
PARP3	-0.0959339	0.856673	0	1	PARP3_2005	pool11	3.58373	5.45759	4.76183	0.531784	23.091	77.2968	poly(ADP-ribose) polymerase family member 3
CEP164	-0.27417	0.245499	1	1	CEP164_4915	pool11	3.58229	5.42588	5.94571	-0.624737	464.982	986.173	centrosomal protein 164kDa
CCND1	-0.347174	-0.0440718	1	0	CCND1_1910	pool11	3.5759	8.05459	5.88843	-3.2153	191.782	445.93	cyclin D1
RAD1	-0.19627	0.313006	0	1	RAD1_495	pool12	3.57514	-0.966355	6.80268	4.88908	321.121	621.302	RAD1 checkpoint DNA exonuclease
SETX	-0.236647	0.152551	0	0	SETX_8820	pool12	3.57342	8.42617	-0.517428	2.81153	0.225696	116.908	senataxin
PYCARD	-0.244811	0.488117	0	1	PYCARD_141	pool11	3.57166	7.34588	4.83615	-1.46706	525.81	432.598	PYD and CARD domain containing
RUVBL2	-0.0803467	0.628563	0	3	RUVBL2_1331	pool12	3.56704	1.67607	4.2897	4.73535	21.7233	92.2506	RuvB-like AAA ATPase 2
MEN1	-0.524474	0.450384	1	0	MEN1_1065	pool13	3.56692	0.613612	4.77684	5.31031	23.5704	77.8037	menin 1
MAD2L2	-0.167491	0.375099	0	0	MAD2L2_490	pool12	3.55627	2.09873	2.44799	6.12209	84.4765	557.419	MAD2 mitotic arrest deficient-like 2 (yeast)
SPDYA	-0.327625	0.10386	0	1	SPDYA_634	pool12	3.55409	0.957468	6.91627	2.78852	143.647	820.397	speedy/RINGO cell cycle regulator family member A
BAX	-0.0896424	1.19246	0	1	BAX_112	pool11	3.5518	1.77002	6.03416	2.85122	26.8764	308.465	BCL2-associated X protein
CXCL12	-0.0597824	1.51286	0	0	CXCL12_315	pool13	3.55105	7.05369	-0.124397	3.72386	1.1358	77.7902	chemokine (C-X-C motif) ligand 12
DCLRE1B	-0.113453	0.50404	0	1	DCLRE1B_3640	pool11	3.54921	2.85964	0.416965	7.37104	164.995	1343.87	DNA cross-link repair 1B
PARP4	-0.184688	0.526075	0	1	PARP4_1061	pool11	3.54717	7.05993	5.19826	-1.61667	571.649	561.009	poly(ADP-ribose) polymerase family member 4
SMG1	-0.33208	0.210349	0	0	SMG1_8964	pool12	3.54566	-2.56325	7.26837	5.93186	64.9135	193.085	SMG1 phosphatidylinositol 3-kinase-related kinase
FANCD2	-0.290137	0.188626	1	0	FANCD2_3854	pool12	3.54563	-0.0837944	5.90802	4.81266	81.5324	185.142	Fanconi anemia complementation group D2
PSMD2	-0.0897492	0.471083	0	1	PSMD2_889	pool12	3.54464	-2.20089	6.38396	6.45085	631.721	728.145	proteasome 26S subunit, non-ATPase 2
POLD1	-0.00230788	1.40671	0	0	POLD1_639	pool11	3.54438	0.259068	4.83211	5.54196	0.767723	50.4925	polymerase (DNA directed), delta 1, catalytic subunit
TFDP3	-0.297483	0.430041	1	0	TFDP3_727	pool13	3.5442	1.39902	6.65253	2.58106	79.9508	509.47	transcription factor Dp family member 3
EPHA2	-0.00935041	1.36452	0	1	EPHA2_1949	pool11	3.54352	2.17683	5.73367	2.72005	19.8453	279.994	EPH receptor A2
BCL3	-0.227678	0.186152	0	0	BCL3_1795	pool12	3.53638	-0.806065	4.84554	6.56966	25.571	117.292	B-cell CLL/lymphoma 3
RAD51AP1	-0.314348	0.508919	1	0	RAD51AP1_389	pool11	3.53455	7.55993	4.64561	-1.6019	330.498	710.286	RAD51 associated protein 1
MAPK12	-0.0454198	1.00966	0	0	MAPK12_1162	pool13	3.52519	1.00848	3.9083	5.65879	53.1434	425.645	mitogen-activated protein kinase 12
NPM1	-0.00217692	1.67572	0	3	NPM1_343	pool11	3.52309	4.28559	4.70357	1.5801	57.9901	324.235	nucleophosmin (nucleolar phosphoprotein B23, numatrin)
DDIT3	-0.196406	0.221776	0	0	DDIT3_833	pool12	3.51246	-1.02758	6.39372	5.17123	320.195	371.965	DNA damage inducible transcript 3
PSMD1	-0.171791	0.466609	0	1	PSMD1_760	pool13	3.50865	1.05973	5.57577	3.89046	173.536	717.064	proteasome 26S subunit, non-ATPase 1
CASP2	-0.168642	0.670602	0	1	CASP2_2998	pool11	3.50845	8.16226	-2.45384	4.81694	121.328	197.891	caspase 2
EYA4	-0.226287	0.144663	1	1	EYA4_3877	pool12	3.50395	-3.26259	7.20408	6.57036	123.645	215.686	EYA transcriptional coactivator and phosphatase 4
OBFC2B	-0.203981	0.27556	0	1	OBFC2B_359	pool12	3.50364	-0.0675935	7.11576	3.46274	84.695	294.26
RAD51	-0.176265	0.674279	1	0	RAD51_438	pool11	3.49972	3.97886	0	6.5203	0.176832	43.8538	RAD51 recombinase
RPS27L	-0.040577	1.01682	0	0	RPS27L_363	pool11	3.49925	1.44668	5.94529	3.10577	342.292	2082.65	ribosomal protein S27 like
PSMF1	-0.090337	0.857611	0	0	PSMF1_2981	pool11	3.49276	1.75012	5.6421	3.08606	83.5243	586.153	proteasome inhibitor subunit 1
TRIP13	-0.171276	0.552532	0	1	TRIP13_839	pool11	3.49005	8.97242	4.74739	-3.24967	988.662	713.917	thyroid hormone receptor interactor 13
RAD1	-0.19627	0.313006	0	1	RAD1_556	pool12	3.48351	-0.403596	4.6461	6.20802	540.107	1092.05	RAD1 checkpoint DNA exonuclease
RFWD3	-0.0903905	1.56067	0	2	RFWD3_4622	pool11	3.48121	5.18681	4.65407	0.602749	26.634	153.242	ring finger and WD repeat domain 3
PARG	-0.382057	0.313811	1	0	PARG_848	pool13	3.47183	1.1145	2.699	6.602	53.2433	317.163	poly(ADP-ribose) glycohydrolase
POLR2J	-0.0238335	0.955068	0	1	POLR2J_120	pool11	3.4705	1.27023	6.33979	2.80147	58.0424	337.215	polymerase (RNA) II (DNA directed) polypeptide J, 13.3kDa
POLD1	-0.00230788	1.40671	0	0	POLD1_2226	pool11	3.46647	-0.363039	3.54239	7.22006	50.9568	168.267	polymerase (DNA directed), delta 1, catalytic subunit
MSX1	-0.048274	0.278602	0	1	MSX1_1842	pool11	3.46454	6.52011	4.75808	-0.884575	816.383	713.28	msh homeobox 1
ALKBH8	-0.226214	0.261933	0	0	ALKBH8_618	pool12	3.46292	0.253974	3.93152	6.20327	180.347	871.202	alkB homolog 8, tRNA methyltransferase
RFC5	-0.044649	0.784362	0	1	RFC5_1850	pool11	3.45119	4.03629	5.17024	1.14706	272.929	1048.15	replication factor C subunit 5
PSMB7	-0.231288	0.176395	1	2	PSMB7_935	pool12	3.44858	-3.65028	7.13131	6.8647	172.301	487.891	proteasome subunit beta 7
CHAF1A	-0.0716041	0.423543	1	2	CHAF1A_1388	pool12	3.44835	-0.351866	5.47851	5.2184	240.621	456.943	chromatin assembly factor 1 subunit A
FOXO3	-1.99568	0.850165	2	0	FOXO3_1892	pool13	3.43959	-0.210003	4.0685	6.46027	32.3106	77.459	forkhead box O3
PSMD4	0	1.2815	1	1	PSMD4_1173	pool13	3.43932	0.365811	4.64554	5.30661	216.054	668.381	proteasome 26S subunit, non-ATPase 4
PSMC2	-0.38405	0.296193	0	0	PSMC2_136	pool13	3.43254	-0.381205	6.46633	4.21248	78.2009	184.297	proteasome 26S subunit, ATPase 2
MNDA	-0.127494	0.888401	0	1	MNDA_1365	pool11	3.43089	4.38666	6.70535	-0.799348	1.75979	144.061	myeloid cell nuclear differentiation antigen
MRPS11	-2.24413	0.505985	0	0	MRPS11_1204	pool12	3.42934	1.31051	2.31776	6.65975	89.539	534.08	mitochondrial ribosomal protein S11
KIAA0101	-0.143332	0.329569	1	2	KIAA0101_352	pool11	3.42726	6.59728	5.01301	-1.32852	304.664	237.342	KIAA0101
PSMA5	-0.276873	0.15422	0	0	PSMA5_1408	pool12	3.42669	-0.984178	5.00966	6.25459	424.915	770.628	proteasome subunit alpha 5
XIAP	-0.0956632	0.61261	0	0	XIAP_1259	pool13	3.42466	0.928539	4.49241	4.85302	312.509	1525.28	X-linked inhibitor of apoptosis
CUL4A	-0.0962591	0.616364	0	1	CUL4A_394	pool11	3.42245	1.31453	5.57889	3.37393	189.099	838.519	cullin 4A
PSMB10	-0.195247	0.272866	0	0	PSMB10_740	pool12	3.41926	0.183297	2.91221	7.16226	107.026	486.214	proteasome subunit beta 10
ABL1	-0.000782434	0.954677	0	1	ABL1_787	pool11	3.41387	4.52264	0.0162171	5.70276	205.041	804.058	ABL proto-oncogene 1, non-receptor tyrosine kinase
AXIN2	-0.125344	0.680686	1	0	AXIN2_3875	pool13	3.41114	0.767253	6.54907	2.91711	149.949	900.685	axin 2
XRCC4	-0.0485168	0.883724	0	1	XRCC4_490	pool11	3.40534	4.29917	6.03662	-0.119789	0.9522	70.2376	X-ray repair complementing defective repair in Chinese hamster cells 4
KIAA2022	-1.12668	0.479385	1	0	KIAA2022_9796	pool13	3.40312	5.53439	0.275727	4.39924	0	21.8861	KIAA2022
PSMD10	-0.20204	0.605198	0	0	PSMD10_317	pool13	3.40143	-1.7908	6.81802	5.17708	13.0971	64.1307	proteasome 26S subunit, non-ATPase 10
SNAI2	0	1.47237	1	2	SNAI2_1844	pool11	3.40101	4.62683	3.41765	2.15855	241.002	2063.44	snail family zinc finger 2
NEK6	-0.627456	-0.153787	0	0	NEK6_2437	pool12	3.40039	-0.160725	3.76352	6.59836	204.611	265.771	NIMA related kinase 6
MCM8	-0.747147	-0.166789	1	0	MCM8_1000	pool12	3.39967	3.15449	1.83684	5.20769	16.1083	119.029	minichromosome maintenance 8 homologous recombination repair factor
TDG	-0.186753	0.686766	0	0	TDG_2804	pool11	3.39761	2.72899	6.05988	1.40398	342.421	1989.02	thymine DNA glycosylase
SIRT6	-0.166853	-0.0574959	0	0	SIRT6_477	pool12	3.39733	-2.78756	6.10091	6.87865	282.546	241.974	sirtuin 6
EME1	-0.129596	0.328642	0	0	EME1_295	pool12	3.39557	1.2557	3.06662	5.86439	110.428	424.098	essential meiotic structure-specific endonuclease 1
BAG6	-0.287687	0.277448	1	2	BAG6_453	pool12	3.39217	-0.672747	3.82268	7.02659	174.747	846.797	BCL2 associated athanogene 6
INO80E	-0.174639	0.219827	0	0	INO80E_162	pool12	3.39142	1.18738	6.60668	2.38019	171.151	725.653	INO80 complex subunit E
DCLRE1C	-0.257432	0.440093	0	0	DCLRE1C_2981	pool11	3.39104	4.92317	5.78719	-0.537254	327.677	576.183	DNA cross-link repair 1C
ATRX	-1.04769	1.23582	2	0	ATRX_5793	pool13	3.38586	1.40298	6.3122	2.44241	29.4441	176.567	alpha thalassemia/mental retardation syndrome X-linked
TEX15	-0.425737	0.837734	0	0	TEX15_6787	pool13	3.38281	-0.698336	6.49594	4.35084	112.563	441.623	testis expressed 15
BRCC3	-0.443456	0.011664	0	0	BRCC3_2440	pool13	3.37798	-0.609818	4.41027	6.33349	151.584	478.48	BRCA1/BRCA2-containing complex subunit 3
EGFR	-0.0366845	1.01592	1	0	EGFR_573	pool11	3.37405	1.95444	5.23051	2.9372	285.404	1918.53	epidermal growth factor receptor
APLF	-0.479124	-0.0916759	2	0	APLF_2777	pool12	3.36619	-0.435602	3.90854	6.62564	1533.81	3446.93	aprataxin and PNKP like factor
TOP2A	-0.153045	1.04048	1	1	TOP2A_2129	pool11	3.36406	5.60822	3.65888	0.825069	60.4188	149.3	topoisomerase (DNA) II alpha
MCM9	-0.261537	0.992679	1	1	MCM9_1087	pool11	3.35615	8.27846	0.527447	1.26255	322.942	851.505	minichromosome maintenance 9 homologous recombination repair factor
PTTG1	-0.224317	0.272866	0	1	PTTG1_8	pool11	3.35166	4.79457	5.06188	0.198534	405.975	1552.08	pituitary tumor-transforming 1
FTO	-0.393726	0.44406	1	0	FTO_1155	pool13	3.34742	-1.03035	5.18685	5.88576	102.939	125.468	fat mass and obesity associated
GADD45A	-0.166917	0.713095	1	0	GADD45A_635	pool11	3.34507	-1.17409	3.72297	7.48633	61.5288	346.401	growth arrest and DNA damage inducible alpha
LIG3	0	0.957818	0	2	LIG3_215	pool12	3.34369	1.81351	3.90909	4.30846	21.2636	115.704	ligase III, DNA, ATP-dependent
SMARCAD1	-0.527682	-0.237321	1	0	SMARCAD1_2661	pool12	3.34151	0.602418	2.73287	6.68923	141.344	417.395	SWI/SNF-related, matrix-associated actin-dependent regulator of chromatin, subfamily a, containing DEAD/H box 1
RPAIN	-0.525347	-0.183361	1	1	RPAIN_231	pool12	3.33407	-1.86768	4.66114	7.20875	33.0193	154.127	RPA interacting protein
RASSF1	-0.0796679	1.42829	1	3	RASSF1_128	pool11	3.33401	6.02609	4.83395	-0.858013	34.3979	95.2148	Ras association domain family member 1
UHRF1	-0.0184985	0.796152	0	1	UHRF1_676	pool12	3.33166	4.51252	5.85823	-0.375789	5.70129	166.817	ubiquitin-like with PHD and ring finger domains 1
EPHA2	-0.00935041	1.36452	0	1	EPHA2_501	pool11	3.33087	0.366156	3.98154	5.64491	140.475	489.007	EPH receptor A2
GTF2H3	-0.283496	0.402744	2	0	GTF2H3_827	pool11	3.3285	1.35859	2.81153	5.81539	204.521	1235.96	general transcription factor IIH subunit 3
RECQL	-0.0297926	0.743042	0	1	RECQL_3256	pool11	3.32413	1.52863	6.20015	2.2436	132.617	926.491	RecQ like helicase
CASP3	-0.0876185	0.691222	0	2	CASP3_1775	pool11	3.32271	1.8208	5.96155	2.18579	311.966	1877.41	caspase 3
EME1	-0.129596	0.328642	0	0	EME1_336	pool12	3.30978	-0.88541	5.12259	5.69215	46.7539	135.672	essential meiotic structure-specific endonuclease 1
SIRT6	-0.166853	-0.0574959	0	0	SIRT6_463	pool12	3.3095	-0.321917	5.05596	5.19447	140.805	173.814	sirtuin 6
USP1	-0.0369681	0.775208	0	0	USP1_962	pool11	3.30555	1.58437	5.72049	2.61178	98.0662	568.318	ubiquitin specific peptidase 1
ASF1A	-0.330683	-0.0829148	0	0	ASF1A_345	pool12	3.30377	-1.05689	5.43768	5.53052	166.374	153.033	anti-silencing function 1A histone chaperone
H2AFX	-0.00983881	0.838932	0	2	H2AFX_1434	pool12	3.30101	-0.915853	6.32274	4.49612	77.303	96.3132	H2A histone family member X
EGFR	-0.0366845	1.01592	1	0	EGFR_397	pool11	3.28856	4.68561	0	5.18007	0.652166	38.4059	epidermal growth factor receptor
TERF2	-1.10073	0.171791	2	0	TERF2_1431	pool13	3.28756	-1.25832	6.08567	5.03534	79.144	147.841	telomeric repeat binding factor 2
ALKBH3	-1.42136	-0.19709	0	0	ALKBH3_811	pool12	3.28546	1.0982	1.9696	6.78858	250.623	1022.42	alkB homolog 3, alpha-ketoglutarate-dependent dioxygenase
CD74	-0.073709	0.544242	1	1	CD74_1094	pool11	3.28259	2.18541	5.81155	1.8508	339.987	2236.39	CD74 molecule
CETN2	-0.153663	0.544242	1	0	CETN2_379	pool11	3.28118	5.69739	2.88345	1.26269	537.244	2629.48	centrin 2
ERCC4	-0.137451	0.310425	0	1	ERCC4_1373	pool12	3.28104	-0.273073	3.32434	6.79186	238.462	471.406	excision repair cross-complementation group 4
SMC6	-0.261378	0.272947	0	0	SMC6_2040	pool11	3.28069	3.36054	5.69348	0.788058	43.6363	376.342	structural maintenance of chromosomes 6
USP47	-1.30627	0.733063	1	0	USP47_7473	pool13	3.27965	5.21084	-0.555145	5.18324	1.68732	76.737	ubiquitin specific peptidase 47
PML	-0.159329	0.491066	0	0	PML_1325	pool12	3.27748	5.95655	5.19879	-1.32291	91.3556	80.8487	promyelocytic leukemia
DDX1	-0.148497	0.470826	1	0	DDX1_2033	pool13	3.26938	1.44915	5.21858	3.14042	58.3808	233.984	DEAD/H-box helicase 1
MBD4	-0.200935	0.882397	0	0	MBD4_941	pool11	3.2683	4.95301	1.56964	3.28225	423.695	2495.16	methyl-CpG binding domain 4 DNA glycosylase
SMUG1	-0.202594	0.344094	0	1	SMUG1_602	pool12	3.2648	4.22767	-0.176174	5.7429	336.62	510.817	single-strand-selective monofunctional uracil-DNA glycosylase 1
RAD51L1	-0.145148	0.229516	0	0	RAD51L1_834	pool12	3.26445	-0.365237	6.64248	3.51611	76.9582	190.382
RDM1	-0.117191	0.519418	0	2	RDM1_85	pool12	3.26368	0.376415	7.44625	1.96838	221.527	866.404	RAD52 motif containing 1
NSMCE4A	-0.264401	0.171082	0	0	NSMCE4A_1004	pool12	3.25841	0.596147	3.22217	5.9569	45.1156	158.604	NSE4 homolog A, SMC5-SMC6 complex component
MC1R	-0.0244303	0.504872	2	0	MC1R_444	pool13	3.25818	1.27865	6.63491	1.86097	54.2513	477.28	melanocortin 1 receptor
TDP1	-0.230106	0.117419	0	0	TDP1_1736	pool12	3.25752	1.08756	2.99051	5.69448	117.125	440.769	tyrosyl-DNA phosphodiesterase 1
APEX1	-0.254769	0.721246	0	0	APEX1_538	pool11	3.25582	1.54091	6.14479	2.08176	455.375	2565.21	APEX nuclease (multifunctional DNA repair enzyme) 1
CDKN2A	-1.14813	-0.0106837	0	0	CDKN2A_665	pool12	3.25548	0.815288	6.54155	2.4096	32.4369	124.089	cyclin-dependent kinase inhibitor 2A
WAC	-0.22541	0.81051	0	0	WAC_2729	pool13	3.25474	0.0195933	6.98444	2.76018	96.308	479.45	WW domain containing adaptor with coiled-coil
RTEL1	-0.204746	0.26496	0	0	RTEL1_1480	pool12	3.25399	0.35144	2.24833	7.1622	97.6067	316.037	regulator of telomere elongation helicase 1
EYA2	-0.15484	0.779369	0	1	EYA2_466	pool11	3.25374	6.96445	-3.73938	6.53616	843.908	555.777	EYA transcriptional coactivator and phosphatase 2
TRIP12	-0.022505	0.777804	0	1	TRIP12_1431	pool12	3.25361	1.47907	4.22718	4.05457	37.5732	478.411	thyroid hormone receptor interactor 12
EYA4	-0.226287	0.144663	1	1	EYA4_639	pool12	3.24713	1.61813	1.18294	6.94031	93.8335	525.69	EYA transcriptional coactivator and phosphatase 4
PSME4	-0.00449643	0.932557	0	2	PSME4_5089	pool11	3.24626	2.50139	-0.399441	7.63684	105.229	254.95	proteasome activator subunit 4
FANCM	-0.166025	0.233215	0	2	FANCM_7089	pool12	3.24034	-0.67521	4.63353	5.7627	115.26	176.413	Fanconi anemia complementation group M
POLM	-0.156705	1.61261	0	1	POLM_2576	pool11	3.2394	5.24592	5.97511	-1.50284	3.71618	188.977	polymerase (DNA directed), mu
FANCE	-0.05532	1.21183	0	0	FANCE_2259	pool11	3.23892	4.73182	-0.402109	5.38706	0.107146	22.1396	Fanconi anemia complementation group E
PLK3	-0.0462403	1.35067	0	2	PLK3_1598	pool11	3.23574	8.11776	0.452128	1.13734	893.541	2197.15	polo like kinase 3
APBB1	-0.311491	1.00789	2	1	APBB1_666	pool13	3.23361	0.303319	4.20187	5.19566	15.7279	40.1407	amyloid beta precursor protein binding family B member 1
DTL	-0.370081	-0.0185892	2	0	DTL_534	pool11	3.23149	5.02864	0.332321	4.33351	4.03808	117.977	denticleless E3 ubiquitin protein ligase homolog
ERCC4	-0.137451	0.310425	0	1	ERCC4_746	pool12	3.23123	-2.74396	6.64094	5.79672	206.343	326.035	excision repair cross-complementation group 4
PSMD3	-0.278107	0.352226	0	0	PSMD3_397	pool12	3.23008	5.4568	3.99953	0.233918	0.215701	22.8136	proteasome 26S subunit, non-ATPase 3
PSMC4	-0.0332015	1.82974	0	3	PSMC4_852	pool11	3.22677	3.53688	5.65801	0.485423	342.031	1029.74	proteasome 26S subunit, ATPase 4
PNKP	-0.266482	0.0272882	0	0	PNKP_1239	pool12	3.22367	-0.830583	4.53782	5.96377	69.5585	81.6909	polynucleotide kinase 3'-phosphatase
TCEA1	-0.414991	-0.37059	0	0	TCEA1_2070	pool12	3.21864	2.68096	5.5091	1.46586	39.8291	332.457	transcription elongation factor A1
INO80E	-0.174639	0.219827	0	0	INO80E_119	pool12	3.21768	-1.39098	4.75907	6.28496	234.284	225.881	INO80 complex subunit E
BCL2	-0.118102	0.882066	0	0	BCL2_85	pool13	3.21374	0.739736	4.67572	4.22577	171.439	1250.08	B-cell CLL/lymphoma 2
TP53	-0.249569	0.462811	0	0	TP53_1054	pool11	3.21068	5.13641	5.91877	-1.42313	33.145	230.999	tumor protein p53
CHEK1	-0.0791986	0.646853	0	1	CHEK1_162	pool11	3.20967	4.10687	5.46365	0.0584845	263.989	1539.86	checkpoint kinase 1
C19orf39	0	1.93181	0	3	C19orf39_1198	pool12	3.20807	-1.16349	5.55378	5.23391	71.2089	155.002
YY1	-0.309804	0.379968	0	0	YY1_1567	pool13	3.19822	2.02474	5.90224	1.66767	24.9811	225.078	YY1 transcription factor
MLH3	-0.033014	0.850473	0	2	MLH3_3300	pool12	3.19519	-0.207445	5.86676	3.92625	188.869	310.161	mutL homolog 3
TP53	-0.249569	0.462811	0	0	TP53_1347	pool11	3.18545	6.40593	5.66059	-2.51019	2.57615	77.0434	tumor protein p53
TFAP4	-1.61979	0.679854	0	0	TFAP4_807	pool13	3.1843	-1.47914	5.89999	5.13205	58.8534	93.3743	transcription factor AP-4 (activating enhancer binding protein 4)
NUPR1	-0.0639389	3.39794	0	1	NUPR1_762	pool11	3.18181	3.17668	5.4434	0.925358	242.788	624.602	nuclear protein 1, transcriptional regulator
REV1	-0.29056	0.412738	1	1	REV1_4313	pool12	3.1765	1.98388	1.33158	6.21403	201.806	959.175	REV1, DNA directed polymerase
MUS81	-0.157017	0.767512	1	0	MUS81_468	pool11	3.17644	4.38884	5.64729	-0.506812	0.859579	48.7368	MUS81 structure-specific endonuclease subunit
NUPR1	-0.0639389	3.39794	0	1	NUPR1_460	pool11	3.16821	4.93101	-0.679737	5.25337	1.4106	31.676	nuclear protein 1, transcriptional regulator
PML	-0.159329	0.491066	0	0	PML_1263	pool12	3.1677	-0.393661	6.62529	3.27148	125.426	185.984	promyelocytic leukemia
ALKBH1	-0.227238	0.469928	0	0	ALKBH1_1428	pool13	3.16219	0.694009	6.1634	2.62916	40.0643	233.716	alkB homolog 1, histone H2A dioxygenase
RFC2	-0.00930604	1.91009	0	1	RFC2_530	pool11	3.15663	1.75537	2.18249	5.53203	54.6446	256.8	replication factor C subunit 2
TWIST1	-0.75721	-0.0106392	0	0	TWIST1_781	pool12	3.14678	-1.09866	7.43578	3.10322	170.571	316.75	twist family bHLH transcription factor 1
POLQ	-0.125576	0.71287	0	2	POLQ_5556	pool11	3.14603	7.92602	-3.98889	5.50095	1790.17	568.474	polymerase (DNA directed), theta
ATRIP	-0.188961	0.414878	0	1	ATRIP_2028	pool12	3.14224	0.613291	3.73155	5.08188	34.1042	73.4268	ATR interacting protein
RPS27L	-0.040577	1.01682	0	0	RPS27L_362	pool11	3.13491	2.52302	6.0853	0.796417	88.0971	417.813	ribosomal protein S27 like
PLK1	-0.583692	0.0904975	2	0	PLK1_2084	pool11	3.13058	0.435004	5.56003	3.39671	226.995	515.107	polo like kinase 1
CSNK1E	-0.741363	-0.184821	0	0	CSNK1E_694	pool12	3.12809	0.119512	2.64048	6.62427	120.848	330.445	casein kinase 1 epsilon
FBXO31	-0.755723	-0.701147	2	0	FBXO31_3580	pool12	3.12614	6.56383	6.39206	-3.57748	672.207	261.859	F-box protein 31
PRKCG	-0.403183	0.24849	2	0	PRKCG_1681	pool13	3.12337	-0.235304	5.86003	3.74538	75.9765	130.656	protein kinase C gamma
HMGA1	-0.479779	0.160208	1	0	HMGA1_1305	pool13	3.11836	-2.54824	6.50122	5.40211	15.7892	101.12	high mobility group AT-hook 1
MMS19	-0.212185	0.75721	0	1	MMS19_207	pool13	3.11832	1.61957	2.24447	5.49093	40.0453	198.683	MMS19 homolog, cytosolic iron-sulfur assembly component
PSMA1	-1.95078	-1.57025	3	0	PSMA1_63	pool12	3.11816	1.33299	1.45265	6.56885	403.187	1651.32	proteasome subunit alpha 1
POLR2L	-0.0713482	0.467118	0	2	POLR2L_710	pool12	3.11595	2.65673	2.29436	4.39675	29.1969	174.44	polymerase (RNA) II (DNA directed) polypeptide L, 7.6kDa
PSMB4	-0.0874591	0.360613	0	2	PSMB4_758	pool11	3.11175	3.01461	5.84848	0.472152	0.642877	58.4047	proteasome subunit beta 4
RECQL	-0.0297926	0.743042	0	1	RECQL_3533	pool11	3.10881	3.8633	5.73607	-0.272947	629.316	931.102	RecQ like helicase
USP3	-0.0540393	0.741602	0	2	USP3_558	pool11	3.10807	2.43448	5.68563	1.20411	464.966	2272.36	ubiquitin specific peptidase 3
GEN1	-0.331614	0.0850754	0	0	GEN1_258	pool12	3.10622	-0.595969	2.32606	7.58857	193.701	447.56	GEN1, Holliday junction 5' flap endonuclease
PTPN11	-0.535809	-0.0156978	1	0	PTPN11_1901	pool13	3.10375	0.305679	6.94713	2.05845	38.9684	211.692	protein tyrosine phosphatase, non-receptor type 11
RFC5	-0.044649	0.784362	0	1	RFC5_1719	pool11	3.10311	3.83388	5.94267	-0.467218	40.4794	93.519	replication factor C subunit 5
RPA3	-0.401976	-0.507799	2	0	RPA3_1556	pool11	3.10264	2.60599	2.44023	4.26171	304.187	1976.68	replication protein A3
SMC3	-0.088576	0.488384	0	1	SMC3_860	pool12	3.09933	-1.56767	4.08806	6.77759	84.6911	101.59	structural maintenance of chromosomes 3
SMC3	-0.088576	0.488384	0	1	SMC3_1337	pool12	3.09777	0.187974	2.44998	6.65536	418.967	1383.72	structural maintenance of chromosomes 3
PSMB1	-0.278519	0.319664	1	0	PSMB1_378	pool11	3.09466	9.6206	-1.74715	1.41054	1353.94	1797.01	proteasome subunit beta 1
MACROD1	-0.0213631	0.798876	0	1	MACROD1_468	pool12	3.09371	0.466186	5.00256	3.81237	33.9616	81.0724	MACRO domain containing 1
MMS19	-0.212185	0.75721	0	1	MMS19_2821	pool13	3.09133	-1.1374	4.89857	5.51282	256.291	332.517	MMS19 homolog, cytosolic iron-sulfur assembly component
C12orf48	-0.274987	0.0204516	1	0	C12orf48_2026	pool12	3.08614	-0.0438223	6.74255	2.55969	364.792	742.146
PSMB7	-0.231288	0.176395	1	2	PSMB7_936	pool12	3.08452	-1.98064	5.22281	6.01138	90.9532	98.3204	proteasome subunit beta 7
GTF2H3	-0.283496	0.402744	2	0	GTF2H3_206	pool11	3.07609	4.67711	1.82638	2.72477	61.9694	436.243	general transcription factor IIH subunit 3
UBB	-0.231362	0.315424	0	1	UBB_674	pool13	3.07512	4.33797	-0.847628	5.73503	0.911436	39.8962	ubiquitin B
PGAP2	-0.20128	0.430626	0	0	PGAP2_393	pool12	3.07388	-1.40091	5.86981	4.75276	9.71084	48.3452	post-GPI attachment to proteins 2
PSMC5	-0.140082	0.487983	0	0	PSMC5_130	pool13	3.07326	-0.249301	6.65372	2.81536	212.382	603.544	proteasome 26S subunit, ATPase 5
KIAA0415	-0.328179	-0.615647	1	0	KIAA0415_2072	pool12	3.07271	1.96998	6.12349	1.12466	65.2722	267.05
SMC2	-0.00917295	2.50864	0	2	SMC2_2489	pool11	3.0707	1.76003	5.60583	1.84624	116.001	544.449	structural maintenance of chromosomes 2
ANKRD1	-0.442493	0.517841	0	0	ANKRD1_685	pool13	3.06764	-0.687835	6.03742	3.85334	48.3649	90.6833	ankyrin repeat domain 1
SMUG1	-0.202594	0.344094	0	1	SMUG1_485	pool12	3.06169	2.93918	0.897056	5.34882	11.7125	67.7712	single-strand-selective monofunctional uracil-DNA glycosylase 1
IRF3	-0.242225	0.31894	0	0	IRF3_64	pool12	3.06088	1.68208	0.499347	7.00122	110.732	395.944	interferon regulatory factor 3
CRIP1	0	1.2815	0	3	CRIP1_20	pool11	3.0571	0.61122	2.74551	5.81455	0.712562	28.6016	cysteine rich protein 1
USP1	-0.0369681	0.775208	0	0	USP1_261	pool11	3.05312	0.259068	4.87466	4.02562	0.4761	26.5559	ubiquitin specific peptidase 1
PLK5	-1.13727	0.280669	1	0	PLK5_652	pool13	3.04244	-1.03619	5.65897	4.50453	10.1421	54.0463	polo like kinase 5
SGK1	-0.896196	0.219827	1	0	SGK1_367	pool12	3.04113	1.544	0.449949	7.12943	82.3518	302.78	serum/glucocorticoid regulated kinase 1
C12orf48	-0.274987	0.0204516	1	0	C12orf48_1647	pool12	3.03708	-0.767785	3.70709	6.17193	28.5182	95.6688
APTX	-0.205582	0.318307	0	0	APTX_978	pool12	3.03332	-2.10058	5.88809	5.31244	131.451	77.6677	aprataxin
DDB2	-0.00291956	1.10735	0	1	DDB2_328	pool11	3.03196	-0.20819	6.0514	3.25268	182.725	457.337	damage specific DNA binding protein 2
WNT1	-0.351445	0.602929	1	0	WNT1_2023	pool13	3.03024	0.689411	4.92891	3.4724	76.5927	224.363	wingless-type MMTV integration site family member 1
HMGB2	-0.013094	1.22403	0	2	HMGB2_95	pool11	3.02493	-3.9041	5.13999	7.8389	296.171	200.301	high mobility group box 2
IKBKE	-0.143452	0.456926	1	0	IKBKE_480	pool11	3.02229	2.19512	5.93317	0.938581	799.754	2471.13	inhibitor of kappa light polypeptide gene enhancer in B-cells, kinase epsilon
CSNK1D	-0.0332015	0.441772	0	2	CSNK1D_1675	pool11	3.02081	3.11644	5.31691	0.629085	310.072	768.866	casein kinase 1 delta
PSMD14	-1.8041	-0.34592	1	0	PSMD14_1576	pool12	3.02073	-0.686636	3.70652	6.04233	664.347	1176.55	proteasome 26S subunit, non-ATPase 14
NKX3-1	-0.0438796	0.862963	1	0	NKX3-1_1650	pool13	3.01478	2.21292	2.48554	4.34586	175.893	1088.59	NK3 homeobox 1
BCL2	-0.118102	0.882066	0	0	BCL2_215	pool13	3.01405	0.449789	5.78798	2.80439	102.453	501.727	B-cell CLL/lymphoma 2
MSH6	-0.146606	0.216597	1	1	MSH6_2569	pool11	3.00835	-3.35	5.92968	6.44537	4313.21	1269.91	mutS homolog 6
NEK11	-0.466355	0.113961	0	0	NEK11_1410	pool12	3.00624	-0.45346	3.64211	5.83006	263.562	609.626	NIMA related kinase 11
NSMCE4A	-0.264401	0.171082	0	0	NSMCE4A_1312	pool12	3.00318	0.663705	2.6378	5.70803	242.119	850.628	NSE4 homolog A, SMC5-SMC6 complex component
DCLRE1C	-0.257432	0.440093	0	0	DCLRE1C_3333	pool11	2.99946	-0.945097	5.85472	4.08875	114.721	311.809	DNA cross-link repair 1C
RAD9A	-0.247952	1.29843	0	0	RAD9A_1591	pool11	2.99026	3.17084	2.32401	3.47592	44.1786	295.211	RAD9 checkpoint clamp component A
CHD1L	-0.133417	0.659953	0	1	CHD1L_1600	pool11	2.98884	4.818	4.7997	-0.651166	226.161	266.866	chromodomain helicase DNA binding protein 1-like
GADD45A	-0.166917	0.713095	1	0	GADD45A_765	pool11	2.97936	3.50018	5.60913	-0.171223	1299.48	2604.23	growth arrest and DNA damage inducible alpha
DDIT3	-0.196406	0.221776	0	0	DDIT3_252	pool12	2.97728	-0.865606	3.74651	6.05095	154.515	391.249	DNA damage inducible transcript 3
ALKBH1	-0.227238	0.469928	0	0	ALKBH1_701	pool13	2.96593	4.88079	0.0182996	3.9987	15.1566	235.45	alkB homolog 1, histone H2A dioxygenase
SMC1B	-1.19928	-0.0287706	1	0	SMC1B_1164	pool13	2.96563	-0.355079	3.72783	5.52413	114.377	379.086	structural maintenance of chromosomes 1B
EPC2	-0.208731	0.36947	1	0	EPC2_950	pool13	2.96183	0.496483	6.10199	2.28703	152.632	493.164	enhancer of polycomb homolog 2
BCLAF1	-2.42022	0.516698	0	0	BCLAF1_307	pool13	2.96	-0.497242	6.74939	2.62786	71.2703	457.604	BCL2 associated transcription factor 1
SPDYA	-0.327625	0.10386	0	1	SPDYA_52	pool12	2.9555	-0.126432	2.88708	6.10585	185.51	674.481	speedy/RINGO cell cycle regulator family member A
MRPS9	-0.31078	0.46382	1	0	MRPS9_298	pool13	2.95097	-1.92252	5.54442	5.23099	112.442	98.9655	mitochondrial ribosomal protein S9
MCL1	-0.00471589	0.798057	0	2	MCL1_1231	pool11	2.94565	1.46841	5.17614	2.19239	118.628	489.366	myeloid cell leukemia 1
NUDT16	-0.274252	0.526513	1	0	NUDT16_54	pool13	2.94311	1.18076	4.10262	3.54593	4.68134	22.7967	nudix hydrolase 16
IGHMBP2	-1.46218	0.119358	2	0	IGHMBP2_2317	pool13	2.93985	0.745351	6.26346	1.81074	114.795	351.031	immunoglobulin mu binding protein 2
POLL	-0.274578	0.249646	1	0	POLL_1835	pool13	2.93819	1.30186	2.44799	5.06471	81.8625	386.198	polymerase (DNA directed), lambda
PSMA5	-0.276873	0.15422	0	0	PSMA5_1890	pool12	2.93761	2.0581	0.278011	6.4767	271.406	808.759	proteasome subunit alpha 5
PLK3	-0.0462403	1.35067	0	2	PLK3_1160	pool11	2.93688	1.56561	5.97431	1.27072	214.939	832.955	polo like kinase 3
PSMA5	-0.276873	0.15422	0	0	PSMA5_3339	pool12	2.93486	-0.223683	2.59555	6.43272	350.024	827.116	proteasome subunit alpha 5
GTF2H5	-0.632085	0.00886256	0	0	GTF2H5_2167	pool13	2.93294	0.0962405	6.396	2.30657	486.354	1377.28	general transcription factor IIH subunit 5
RAD51C	-0.308919	0.312114	0	0	RAD51C_173	pool13	2.93176	-0.704199	4.50491	4.99456	75.2061	78.771	RAD51 paralog C
MUC1	-0.0125572	0.802168	0	2	MUC1_349	pool12	2.93143	-1.75934	5.39027	5.16335	359.245	160.664	mucin 1, cell surface associated
FEN1	-0.171405	0.263683	0	1	FEN1_1767	pool12	2.92666	1.06032	1.34264	6.377	604.001	2002.67	flap structure-specific endonuclease 1
SMC4	-0.090444	1.3279	0	1	SMC4_825	pool11	2.92593	2.48589	5.73765	0.554262	268.021	1135.26	structural maintenance of chromosomes 4
FANCL	-0.333388	0.118558	0	0	FANCL_749	pool12	2.92543	-0.926206	3.62831	6.07418	464.788	646.177	Fanconi anemia complementation group L
FEM1B	-0.874194	-0.0124231	2	0	FEM1B_909	pool13	2.9242	1.61272	6.51942	0.640464	129.581	434.804	fem-1 homolog b (C. elegans)
MNDA	-0.127494	0.888401	0	1	MNDA_104	pool11	2.92039	3.73475	5.53324	-0.506812	1.07387	51.6927	myeloid cell nuclear differentiation antigen
PSMC5	-0.140082	0.487983	0	0	PSMC5_244	pool13	2.92019	0.0877032	2.44481	6.22807	107.666	278.873	proteasome 26S subunit, ATPase 5
MACROD1	-0.0213631	0.798876	0	1	MACROD1_555	pool12	2.92008	1.27721	6.61481	0.868211	89.956	277.502	MACRO domain containing 1
SSRP1	-0.280337	0.956638	1	0	SSRP1_1951	pool11	2.9174	2.06928	-0.738268	7.4212	99.5217	562.055	structure specific recognition protein 1
PSMB3	-0.253366	0.500038	0	1	PSMB3_187	pool11	2.91544	6.97801	3.42902	-1.66072	77.599	869.799	proteasome subunit beta 3
MACROD1	-0.0213631	0.798876	0	1	MACROD1_68	pool12	2.91437	3.03796	5.84663	-0.141496	9.1173	102.002	MACRO domain containing 1
PALB2	-0.0608303	1.15366	0	0	PALB2_1610	pool11	2.91289	2.00553	-0.669233	7.40239	184.349	1605.15	partner and localizer of BRCA2
ALKBH8	-0.226214	0.261933	0	0	ALKBH8_617	pool12	2.91172	0.449144	1.54936	6.73666	304.591	1060.44	alkB homolog 8, tRNA methyltransferase
UNG	-0.000477987	4	0	3	UNG_1317	pool11	2.90946	-0.56914	6.36749	2.93004	27.9037	462.288	uracil DNA glycosylase
MRPS35	-0.251657	0.765483	2	0	MRPS35_770	pool13	2.90247	3.01794	2.10729	3.5822	34.2566	249.689	mitochondrial ribosomal protein S35
MDM4	-0.337148	0.0761345	0	0	MDM4_5064	pool12	2.90181	0.710825	6.04506	1.94954	93.4006	227.921	MDM4, p53 regulator
PSME1	-0.196884	0.256333	1	1	PSME1_339	pool11	2.90171	3.27127	-0.808322	6.24217	7.22764	108.852	proteasome activator subunit 1
STRA13	-0.34515	0.0381994	0	1	STRA13_551	pool12	2.89997	2.28787	-0.0981664	6.5102	110.669	345.172	stimulated by retinoic acid 13
DDX1	-0.148497	0.470826	1	0	DDX1_1613	pool13	2.89846	4.32719	-2.59706	6.96526	6.46488	143.671	DEAD/H-box helicase 1
TRIP13	-0.171276	0.552532	0	1	TRIP13_858	pool11	2.88531	2.09016	5.91335	0.6524	164.696	755.605	thyroid hormone receptor interactor 13
NEIL3	-0.167172	0.397181	0	0	NEIL3_734	pool11	2.88012	0.291725	5.84428	2.50435	255.511	1201.62	nei like DNA glycosylase 3
RFC4	-0.181378	0.205721	1	0	RFC4_769	pool11	2.87724	2.37598	5.54412	0.711632	447.583	1654.45	replication factor C subunit 4
RAD51L3	-0.189767	0.613144	1	1	RAD51L3_1791	pool13	2.87477	0.921095	3.87629	3.82693	41.4983	225.192
PSMD6	-0.022185	1.27654	0	1	PSMD6_1213	pool13	2.8742	0.915114	6.2763	1.43118	233.028	775.395	proteasome 26S subunit, non-ATPase 6
MORF4L2	-0.229811	0.24382	0	1	MORF4L2_1348	pool12	2.87406	1.7563	1.24907	5.61682	100.172	347.095	mortality factor 4 like 2
ERCC4	-0.137451	0.310425	0	1	ERCC4_592	pool12	2.87364	0.890679	1.33095	6.39929	248.504	879.015	excision repair cross-complementation group 4
MC1R	-0.0244303	0.504872	2	0	MC1R_1804	pool13	2.87197	1.10473	5.8212	1.68997	74.2529	288.217	melanocortin 1 receptor
ACTL6A	-0.0386738	0.442493	0	0	ACTL6A_1061	pool11	2.87157	2.75519	3.68673	2.1728	137.202	1071.48	actin like 6A
BRCA1	-0.271322	0.31007	1	0	BRCA1_190	pool11	2.86955	2.59075	5.93613	0.081766	395.594	1073.95	breast cancer 1
XRCC1	-0.0085967	1.0752	0	1	XRCC1_1397	pool12	2.86899	0.217007	4.01652	4.37345	28.3735	47.3527	X-ray repair complementing defective repair in Chinese hamster cells 1
PSMB3	-0.253366	0.500038	0	1	PSMB3_640	pool11	2.86611	2.82739	5.87243	-0.101494	1.30345	84.1911	proteasome subunit beta 3
SMC3	-0.088576	0.488384	0	1	SMC3_1442	pool12	2.86493	0.385783	6.2899	1.9191	171.173	401.665	structural maintenance of chromosomes 3
ZSWIM7	-0.305044	0.868061	0	0	ZSWIM7_1170	pool13	2.86366	2.88842	1.02443	4.67814	27.3825	116.07	zinc finger SWIM-type containing 7
FEN1	-0.171405	0.263683	0	1	FEN1_2084	pool12	2.86234	1.46955	4.94992	2.16756	99.0436	362.129	flap structure-specific endonuclease 1
CRY1	-0.189431	1.50864	1	1	CRY1_1265	pool11	2.8571	7.63499	4.8136	-3.8773	326.239	383.342	cryptochrome circadian clock 1
GEN1	-0.331614	0.0850754	0	0	GEN1_5089	pool12	2.85642	-2.19368	3.81952	6.94341	172.855	389.825	GEN1, Holliday junction 5' flap endonuclease
PARP9	-0.349401	0.215739	0	1	PARP9_1998	pool12	2.84927	0.463353	0.985812	7.09864	374.079	1079.5	poly(ADP-ribose) polymerase family member 9
C19orf40	-0.345342	0.142909	1	0	C19orf40_616	pool12	2.84691	0.322919	2.00632	6.2115	220.652	608.967
RHNO1	-1.3279	-0.435097	0	0	RHNO1_890	pool12	2.84091	1.119	1.17463	6.22912	243.707	755.274	RAD9-HUS1-RAD1 interacting nuclear orphan 1
RAD54B	-0.291154	0.313811	0	1	RAD54B_2062	pool12	2.84032	-0.123892	3.23496	5.40988	133.948	335.548	RAD54 homolog B (S. cerevisiae)
DDIT4	-0.355364	0.162727	2	0	DDIT4_836	pool11	2.83756	2.70894	5.89721	-0.0934582	19.4609	90.9957	DNA damage inducible transcript 4
AP5S1	-0.152242	0.390086	0	0	AP5S1_1720	pool12	2.83686	-1.125	6.43888	3.1967	130.164	160.487	adaptor related protein complex 5 sigma 1 subunit
SMC6	-0.261378	0.272947	0	0	SMC6_1267	pool11	2.83636	-0.611791	3.60197	5.51889	33.0446	85.6098	structural maintenance of chromosomes 6
NBN	-0.333108	0.115375	2	1	NBN_2970	pool11	2.8351	3.01356	5.92829	-0.436546	682.38	1446.29	nibrin
DTX3L	-2.17393	-0.113904	0	0	DTX3L_1591	pool12	2.83407	1.0267	6.00956	1.46595	94.8591	270.777	deltex 3 like, E3 ubiquitin ligase
PSMD3	-0.278107	0.352226	0	0	PSMD3_1366	pool12	2.83241	0.252925	1.66889	6.57542	303.849	1149.38	proteasome 26S subunit, non-ATPase 3
EPC2	-0.208731	0.36947	1	0	EPC2_210	pool13	2.82943	1.17143	5.35193	1.96491	58.3504	272.069	enhancer of polycomb homolog 2
RFC5	-0.044649	0.784362	0	1	RFC5_358	pool11	2.82791	1.80244	6.15626	0.525021	322.721	1069.61	replication factor C subunit 5
XRCC4	-0.0485168	0.883724	0	1	XRCC4_562	pool11	2.82788	6.02336	-3.55197	6.01224	112.768	89.6908	X-ray repair complementing defective repair in Chinese hamster cells 4
TDP1	-0.230106	0.117419	0	0	TDP1_2447	pool12	2.82784	3.58674	4.89678	0	0.0719002	15.4103	tyrosyl-DNA phosphodiesterase 1
IGHMBP2	-1.46218	0.119358	2	0	IGHMBP2_766	pool13	2.82643	0.429357	6.62792	1.42201	78.0348	243.824	immunoglobulin mu binding protein 2
C11orf30	-0.191249	1.63264	0	0	C11orf30_1870	pool13	2.82612	5.31822	-0.639958	3.8001	205.096	199.972
POLR2G	-0.271809	0.149967	0	0	POLR2G_795	pool11	2.82406	2.63996	6.04916	-0.216944	297.882	953.14	polymerase (RNA) II (DNA directed) polypeptide G
POLR2D	-0.124187	1.73993	1	1	POLR2D_899	pool11	2.8189	3.87137	2.41057	2.17475	380.096	2265.07	polymerase (RNA) II (DNA directed) polypeptide D
USP47	-1.30627	0.733063	1	0	USP47_2649	pool13	2.81489	0.799604	5.9192	1.72585	714.759	2203.99	ubiquitin specific peptidase 47
GTF2H3	-0.283496	0.402744	2	0	GTF2H3_462	pool11	2.81297	1.97357	5.71433	0.751003	313.301	1170.21	general transcription factor IIH subunit 3
MORF4L2	-0.229811	0.24382	0	1	MORF4L2_1120	pool12	2.8053	0.471714	1.46204	6.48215	269.345	869.398	mortality factor 4 like 2
PARP1	-0.978811	0.160208	0	0	PARP1_2999	pool12	2.80389	0.534359	1.88057	5.99674	185.089	569.192	poly(ADP-ribose) polymerase 1
PARP4	-0.184688	0.526075	0	1	PARP4_3169	pool11	2.79326	4.51098	4.99835	-1.12955	440.198	509.339	poly(ADP-ribose) polymerase family member 4
ING2	-0.947306	-0.298087	1	0	ING2_506	pool12	2.79315	1.02991	6.47002	0.879509	232.099	617.04	inhibitor of growth family member 2
PSME4	-0.00449643	0.932557	0	2	PSME4_4180	pool11	2.79142	5.64395	2.72928	0.00104664	12.3794	102.441	proteasome activator subunit 4
DDB2	-0.00291956	1.10735	0	1	DDB2_1471	pool11	2.79005	3.76707	5.84066	-1.23757	259.473	495.276	damage specific DNA binding protein 2
DGKZ	-0.422738	0.337148	1	0	DGKZ_2174	pool13	2.78994	-0.506119	1.6948	7.18113	128.659	386.278	diacylglycerol kinase zeta
PCNA	-0.219107	0.263285	1	0	PCNA_441	pool11	2.78745	2.29422	5.47579	0.59233	612.334	1598.32	proliferating cell nuclear antigen
CUL4A	-0.0962591	0.616364	0	1	CUL4A_1087	pool11	2.78618	2.13676	5.87561	0.346175	277.987	873.245	cullin 4A
SETD8	-0.256725	0.214101	0	0	SETD8_374	pool12	2.78579	1.40776	0.556322	6.3933	165.091	455.241
MAPK14	-0.236497	0.295078	0	2	MAPK14_1005	pool12	2.78402	0.410755	7.17666	0.764649	199.758	515.572	mitogen-activated protein kinase 14
PRKCG	-0.403183	0.24849	2	0	PRKCG_895	pool13	2.78356	1.46266	6.37608	0.511947	371.484	1189.31	protein kinase C gamma
RAD51	-0.176265	0.674279	1	0	RAD51_1899	pool11	2.7808	1.56683	1.30656	5.469	542.847	2357.62	RAD51 recombinase
RECQL5	-0.610302	-0.548982	2	0	RECQL5_138	pool12	2.77889	4.957	-1.17583	4.5555	47.2793	111.585	RecQ like helicase 5
DDIT3	-0.196406	0.221776	0	0	DDIT3_6	pool12	2.7778	1.70021	6.83849	-0.205305	249.757	589.753	DNA damage inducible transcript 3
BRCA2	-0.227458	0.012736	1	0	BRCA2_10453	pool11	2.77727	2.72988	-0.716224	6.31814	5.18934	61.146	breast cancer 2
PSMB10	-0.195247	0.272866	0	0	PSMB10_737	pool12	2.7765	0.342326	4.15918	3.82801	93.0403	132.842	proteasome subunit beta 10
SMC6	-0.261378	0.272947	0	0	SMC6_1268	pool11	2.77624	4.8346	4.82394	-1.32982	842.758	878.867	structural maintenance of chromosomes 6
DGKZ	-0.422738	0.337148	1	0	DGKZ_1346	pool13	2.77378	1.51243	5.6093	1.19962	190.397	1153.23	diacylglycerol kinase zeta
RBBP8	-0.260744	0.434034	0	1	RBBP8_164	pool11	2.77339	3.63555	5.20494	-0.520311	644.295	1454.58	retinoblastoma binding protein 8
ATR	-1.18243	-0.0182267	2	0	ATR_4220	pool13	2.77296	1.34101	0.804507	6.17337	180.474	541.603	ATR serine/threonine kinase
PSMB8	-0.254223	0.306713	1	1	PSMB8_264	pool11	2.76845	6.39923	4.36624	-2.46011	1.96309	36.6167	proteasome subunit beta 8
POLD3	-0.316503	0.0316572	0	0	POLD3_1719	pool11	2.76815	3.41577	4.65052	0.238167	900.489	2087.67	polymerase (DNA-directed), delta 3, accessory subunit
RPA2	-0.294307	0.127902	1	1	RPA2_913	pool12	2.76718	1.05764	0.451502	6.79239	147.354	397.72	replication protein A2
VAV3	-0.686977	-0.121708	2	0	VAV3_1729	pool12	2.76594	1.11426	0.768756	6.4148	700.194	2130.62	vav guanine nucleotide exchange factor 3
HIPK1	-0.392438	0.645124	1	0	HIPK1_1296	pool13	2.76039	2.07211	1.11035	5.09871	67.0013	263.51	homeodomain interacting protein kinase 1
GADD45G	-1.75696	-0.827105	2	0	GADD45G_105	pool12	2.75839	-3.70339	5.67828	6.30029	131.657	220.058	growth arrest and DNA damage inducible gamma
ALKBH3	-1.42136	-0.19709	0	0	ALKBH3_396	pool12	2.75524	-0.221824	1.95772	6.52983	257.634	419.353	alkB homolog 3, alpha-ketoglutarate-dependent dioxygenase
C12orf48	-0.274987	0.0204516	1	0	C12orf48_486	pool12	2.75417	-1.58782	3.58968	6.26066	853.692	1188.5
TRIAP1	-0.0147532	1.92812	0	0	TRIAP1_175	pool11	2.75219	1.90847	3.8393	2.50882	158.824	1044.42	TP53 regulated inhibitor of apoptosis 1
RECQL5	-0.610302	-0.548982	2	0	RECQL5_830	pool12	2.74778	2.82488	-1.64292	7.06138	242.951	684.004	RecQ like helicase 5
PSME1	-0.196884	0.256333	1	1	PSME1_299	pool11	2.74723	1.61927	5.47899	1.14344	128.06	568.748	proteasome activator subunit 1
SPRED2	-0.438899	0.69702	1	0	SPRED2_418	pool13	2.74418	-0.0346897	7.12755	1.13967	246.94	604.53	sprouty-related, EVH1 domain containing 2
C9orf119	-0.572676	-0.287519	2	0	C9orf119_623	pool12	2.7424	-1.10002	5.03866	4.28854	133.721	167.593
AEN	-0.165706	0.515985	0	1	AEN_3081	pool11	2.74134	3.36497	5.54869	-0.689656	656.231	1226.33	apoptosis enhancing nuclease
LYN	-0.0104612	1.78781	0	0	LYN_2842	pool11	2.74023	1.97688	1.50714	4.73666	71.3126	478.521	LYN proto-oncogene, Src family tyrosine kinase
MSH4	-0.949234	1.7167	0	0	MSH4_3133	pool13	2.73788	0.997696	5.22131	1.99461	675.125	2111.54	mutS homolog 4
ACD	-1.40561	0.466101	1	0	ACD_1293	pool13	2.73479	0.737948	3.20932	4.2571	54.8494	229.359	adrenocortical dysplasia homolog (mouse)
PRKDC	-0.259085	0.1926	0	1	PRKDC_11971	pool11	2.73387	7.86367	0.0544759	0.283464	1.58855	79.2474	protein kinase, DNA-activated, catalytic polypeptide
POLN	-0.24382	0.826522	0	0	POLN_90	pool13	2.73105	1.56114	5.79431	0.837705	176.505	482.737	polymerase (DNA directed) nu
CDKN1A	-0.0305375	0.999566	0	2	CDKN1A_582	pool11	2.73015	1.73513	4.60003	1.85529	121.76	578.62	cyclin-dependent kinase inhibitor 1A (p21, Cip1)
EP300	-0.262728	0.238222	0	1	EP300_3929	pool12	2.72062	6.29328	-3.06812	4.93671	580.225	235.563	E1A binding protein p300
ING4	-0.234182	0.0609802	1	0	ING4_363	pool12	2.71519	2.03161	1.13705	4.97691	41.0737	129.213	inhibitor of growth family member 4
MICA	-0.560509	0.296107	1	0	MICA_605	pool11	2.71428	8.59755	5.21652	-5.67124	42.2346	271.473	MHC class I polypeptide-related sequence A
MAD2L2	-0.167491	0.375099	0	0	MAD2L2_907	pool12	2.71333	0.276456	1.63107	6.23245	221.457	635.649	MAD2 mitotic arrest deficient-like 2 (yeast)
RFC1	-0.194227	0.238222	0	1	RFC1_1454	pool11	2.71152	5.40425	4.98875	-2.25844	565.666	242.442	replication factor C subunit 1
WDR33	-1.88941	-0.465339	2	0	WDR33_480	pool13	2.71102	0.617983	6.12184	1.39325	188.985	525.095	WD repeat domain 33
BCCIP	-0.199489	1.72125	1	2	BCCIP_444	pool11	2.71071	5.11397	5.72026	-2.70212	425.637	810.706	BRCA2 and CDKN1A interacting protein
CRIP1	0	1.2815	0	3	CRIP1_329	pool11	2.71019	2.32403	5.28173	0.524828	28.4427	114.767	cysteine rich protein 1
POLG2	-0.00939479	1.31605	0	2	POLG2_766	pool11	2.71009	2.59095	5.82831	-0.288977	211.807	797.778	polymerase (DNA directed), gamma 2, accessory subunit
DEK	-0.159831	0.708409	0	0	DEK_448	pool11	2.70632	4.66982	2.20088	1.24826	81.9776	322.709	DEK proto-oncogene
DDX1	-0.148497	0.470826	1	0	DDX1_1073	pool13	2.70313	1.63055	6.34732	0.131506	38.0564	129.873	DEAD/H-box helicase 1
SNAI1	-0.978811	0.0719628	1	0	SNAI1_1019	pool13	2.70001	0.491485	0.939709	6.66885	254.281	724.444	snail family zinc finger 1
PSMD13	-0.1673	2.27572	0	0	PSMD13_425	pool11	2.69776	1.8727	-0.331895	6.55248	461.841	1645.42	proteasome 26S subunit, non-ATPase 13
CETN2	-0.153663	0.544242	1	0	CETN2_237	pool11	2.69621	2.4728	-0.621561	6.2374	279.868	488.447	centrin 2
RAD50	-0.164373	0.374996	1	2	RAD50_5725	pool12	2.69266	-0.434766	3.53421	4.97854	645.703	1480.33	RAD50 double strand break repair protein
NUDT16	-0.274252	0.526513	1	0	NUDT16_182	pool13	2.68979	1.36785	2.14001	4.56153	63.8662	329.975	nudix hydrolase 16
CCNG1	-0.186619	0.613144	0	1	CCNG1_782	pool11	2.68876	7.9357	5.2127	-5.08212	741.606	543.988	cyclin G1
TIPIN	-0.146789	1.59346	0	1	TIPIN_283	pool11	2.68725	5.25339	-2.60246	5.41082	710.762	651.051	TIMELESS interacting protein
UPF1	-0.352421	-0.0854453	1	0	UPF1_1047	pool12	2.68546	2.25787	2.16655	3.63196	26.1321	135.32	UPF1 regulator of nonsense transcripts homolog (yeast)
PRKCD	-0.741842	0.0587371	0	0	PRKCD_1271	pool13	2.68332	0.0955939	6.18819	1.76616	68.9745	222.024	protein kinase C delta
E2F1	-0.246417	0.380907	0	0	E2F1_919	pool12	2.68267	1.30864	6.51926	0.220113	97.7321	258.859	E2F transcription factor 1
GTSE1	-0.147154	0.54546	1	1	GTSE1_2424	pool11	2.67941	0.949359	4.53113	2.55774	71.9161	394.582	G2 and S-phase expressed 1
CCNK	-0.42159	-0.0968015	1	0	CCNK_135	pool12	2.67499	1.57884	0.346418	6.09971	508.178	1242.53	cyclin K
PHF1	-0.142426	1.5817	0	1	PHF1_789	pool13	2.67492	3.37757	-0.0572235	4.70443	0.247845	15.7644	PHD finger protein 1
NSMCE4A	-0.264401	0.171082	0	0	NSMCE4A_759	pool12	2.6683	2.43272	-0.753057	6.32522	170.014	266.066	NSE4 homolog A, SMC5-SMC6 complex component
GADD45G	-1.75696	-0.827105	2	0	GADD45G_1033	pool12	2.66662	2.13683	-1.06005	6.92307	1000.12	1436.29	growth arrest and DNA damage inducible gamma
RDM1	-0.117191	0.519418	0	2	RDM1_152	pool12	2.6656	-0.350512	5.89229	2.45502	464.873	1100.3	RAD52 motif containing 1
DNAJA1	-1.4168	0.596708	2	0	DNAJA1_572	pool13	2.65942	0.970587	2.93213	4.07554	109.104	402.785	DnaJ heat shock protein family (Hsp40) member A1
PAXIP1	-0.159706	0.863279	0	1	PAXIP1_2509	pool11	2.65633	2.34736	5.64658	-0.0249477	472.628	868.855	PAX interacting (with transcription-activation domain) protein 1
PSMD10	-0.20204	0.605198	0	0	PSMD10_686	pool13	2.65376	0.406369	1.67802	5.8769	375.553	1129.18	proteasome 26S subunit, non-ATPase 10
KIF22	-0.106571	1.62525	1	3	KIF22_1474	pool11	2.65065	3.48835	4.4636	0	0.0995009	11.5454	kinesin family member 22
NEK11	-0.466355	0.113961	0	0	NEK11_1191	pool12	2.65022	6.07991	-4.45815	6.32888	162.378	131.226	NIMA related kinase 11
HUWE1	-0.383	0.154096	1	0	HUWE1_1377	pool13	2.64928	-2.7827	6.65807	4.07246	96.7632	179.272	HECT, UBA and WWE domain containing 1, E3 ubiquitin protein ligase
NEIL3	-0.167172	0.397181	0	0	NEIL3_608	pool11	2.64227	6.46816	1.97621	-0.517543	29.5537	142.583	nei like DNA glycosylase 3
FANCL	-0.333388	0.118558	0	0	FANCL_646	pool12	2.6417	1.77629	0.945335	5.20348	438.067	1281.92	Fanconi anemia complementation group L
TERF2	-1.10073	0.171791	2	0	TERF2_1118	pool13	2.64103	-0.735952	2.68003	5.97901	77.5321	237.399	telomeric repeat binding factor 2
TRIAP1	-0.0147532	1.92812	0	0	TRIAP1_174	pool11	2.63884	0.618411	4.33036	2.96774	71.6226	293.454	TP53 regulated inhibitor of apoptosis 1
EYA3	-0.0820746	0.571541	0	3	EYA3_4852	pool12	2.63782	-3.48723	6.6528	4.74789	209.769	180.519	EYA transcriptional coactivator and phosphatase 3
POLD1	-0.00230788	1.40671	0	0	POLD1_348	pool11	2.63757	8.63882	-7.44167	6.71556	368.493	393.653	polymerase (DNA directed), delta 1, catalytic subunit
DDB2	-0.00291956	1.10735	0	1	DDB2_980	pool11	2.63409	4.1731	-0.168896	3.89806	214.994	1222.7	damage specific DNA binding protein 2
MSX1	-0.048274	0.278602	0	1	MSX1_1429	pool11	2.6308	4.83568	-2.13162	5.18832	856.422	835.607	msh homeobox 1
TP63	-0.438302	0.0762898	1	0	TP63_578	pool13	2.63061	3.18167	4.34505	0.365124	42.1061	117.329	tumor protein p63
POLR2B	-1.92445	-0.391581	2	0	POLR2B_3069	pool13	2.62911	0.921863	5.582	1.38345	43.4225	137.434	polymerase (RNA) II (DNA directed) polypeptide B, 140kDa
CHCHD6	-1.26841	1.23359	2	0	CHCHD6_900	pool13	2.62764	1.68666	5.47491	0.721342	137.22	453.565	coiled-coil-helix-coiled-coil-helix domain containing 6
SP100	-0.115998	0.95117	1	2	SP100_414	pool11	2.62718	2.0978	5.35599	0.427765	372.171	875.506	SP100 nuclear antigen
KIAA0101	-0.143332	0.329569	1	2	KIAA0101_483	pool11	2.62687	1.5011	5.7345	0.644998	604.879	1743.87	KIAA0101
HIPK1	-0.392438	0.645124	1	0	HIPK1_242	pool13	2.62683	2.35581	5.24385	0.280824	43.8529	172.414	homeodomain interacting protein kinase 1
PSMD12	-0.517412	0.270916	3	0	PSMD12_676	pool13	2.62008	0.509713	5.17045	2.18009	114.814	532.458	proteasome 26S subunit, non-ATPase 12
MASTL	-0.649171	-0.175809	1	0	MASTL_1388	pool12	2.61727	1.68654	0.0532228	6.11204	251.834	547.663	microtubule associated serine/threonine kinase like
ZAK	-0.248336	0.109914	0	0	ZAK_390	pool12	2.61719	0.626667	3.22885	3.99606	118.033	474.3
RINT1	-0.128252	0.578725	0	1	RINT1_2552	pool11	2.6152	2.46687	5.48023	-0.101494	7.60259	115.665	RAD50 interactor 1
SLX1A	-0.125286	0.581699	0	0	SLX1A_790	pool13	2.61378	-0.0727817	5.36556	2.54857	163.732	344.974	SLX1 homolog A, structure-specific endonuclease subunit
TOPBP1	-0.538952	-0.125228	1	1	TOPBP1_3155	pool12	2.61348	0.426923	3.66527	3.74823	183.869	483.054	topoisomerase (DNA) II binding protein 1
RFWD3	-0.0903905	1.56067	0	2	RFWD3_842	pool11	2.61322	7.83613	5.89039	-5.88686	684.738	507.116	ring finger and WD repeat domain 3
RUVBL1	-0.209433	0.426085	1	2	RUVBL1_500	pool11	2.61278	2.86683	5.6633	-0.691777	1.27364	67.5922	RuvB like AAA ATPase 1
MPG	0	1.29414	0	4	MPG_180	pool12	2.61249	3.41492	6.99448	-2.57193	750.262	524.92	N-methylpurine DNA glycosylase
TFPT	-0.392652	0.0859214	1	0	TFPT_1040	pool13	2.60999	1.59091	5.18087	1.05819	75.6806	271.672	TCF3 (E2A) fusion partner (in childhood Leukemia)
RAD23B	-0.421132	0.0667659	1	0	RAD23B_393	pool13	2.60819	-0.266451	1.96112	6.12989	65.0872	160.008	RAD23 homolog B, nucleotide excision repair protein
EXO1	-0.194092	0.452964	0	0	EXO1_577	pool11	2.60515	1.32428	-0.259984	6.75116	307.655	916.302	exonuclease 1
NUPR1	-0.0639389	3.39794	0	1	NUPR1_220	pool11	2.60247	4.30979	2.93007	0.567533	510.881	1381.27	nuclear protein 1, transcriptional regulator
ALKBH8	-0.226214	0.261933	0	0	ALKBH8_2643	pool12	2.59977	-0.0264901	0.939089	6.88672	788.689	1577.54	alkB homolog 8, tRNA methyltransferase
XRCC5	-0.380594	-0.0238794	1	0	XRCC5_1984	pool12	2.59909	-0.325272	2.72811	5.39442	454.847	1017.87	X-ray repair complementing defective repair in Chinese hamster cells 5
BRIP1	-0.331335	-0.0308638	1	1	BRIP1_1469	pool12	2.59735	0.224628	0.993355	6.57407	256.21	722.725	BRCA1 interacting protein C-terminal helicase 1
XRCC2	-0.519993	-0.0679831	0	0	XRCC2_1481	pool12	2.59686	0.10766	1.24531	6.4376	396.574	937.078	X-ray repair complementing defective repair in Chinese hamster cells 2
FGF10	-0.297742	0.43368	0	1	FGF10_201	pool13	2.59048	0.96122	5.64726	1.16297	13.2208	47.9057	fibroblast growth factor 10
ING4	-0.234182	0.0609802	1	0	ING4_310	pool12	2.58832	-1.17847	3.83882	5.10462	743.674	1351.17	inhibitor of growth family member 4
FOXM1	-0.309627	0.203564	0	0	FOXM1_711	pool11	2.58654	5.33697	5.7433	-3.32065	333.482	628.168	forkhead box M1
RAD50	-0.164373	0.374996	1	2	RAD50_2971	pool12	2.58439	0.15442	1.35588	6.24288	470.159	1403.2	RAD50 double strand break repair protein
BCL3	-0.227678	0.186152	0	0	BCL3_1802	pool12	2.5834	0.602875	1.01506	6.13226	801.384	2063.47	B-cell CLL/lymphoma 3
APEX1	-0.254769	0.721246	0	0	APEX1_1187	pool11	2.57678	-4.84268	6.67264	5.90037	191.002	151.147	APEX nuclease (multifunctional DNA repair enzyme) 1
WRN	-0.30777	0.00974997	1	0	WRN_5040	pool11	2.56978	1.64433	5.01833	1.04668	437.651	1580.41	Werner syndrome RecQ like helicase
IRF7	-0.0594835	1.18177	1	2	IRF7_1781	pool11	2.56857	1.10612	5.52443	1.07516	173.406	519.88	interferon regulatory factor 7
KDM1A	-0.500176	0.124244	1	0	KDM1A_1316	pool12	2.56779	1.04302	0.165565	6.49477	1509.11	3230.13	lysine demethylase 1A
XRCC5	-0.380594	-0.0238794	1	0	XRCC5_3136	pool12	2.56635	-0.677858	1.81452	6.56238	605.172	964.939	X-ray repair complementing defective repair in Chinese hamster cells 5
TRIAP1	-0.0147532	1.92812	0	0	TRIAP1_171	pool11	2.56585	4.18554	4.95302	-1.441	211.869	270.887	TP53 regulated inhibitor of apoptosis 1
TRIAP1	-0.0147532	1.92812	0	0	TRIAP1_177	pool11	2.56489	9.05717	-5.92249	4.56	125.275	270.349	TP53 regulated inhibitor of apoptosis 1
RAD9B	-0.609949	0.0587868	0	0	RAD9B_1242	pool12	2.56382	7.78611	-4.23403	4.13936	977.449	146.238	RAD9 checkpoint clamp component B
POLE2	-0.0252581	1.27165	0	3	POLE2_1351	pool11	2.56353	3.23027	5.62829	-1.16798	44.6909	525.45	polymerase (DNA directed), epsilon 2, accessory subunit
FANCE	-0.05532	1.21183	0	0	FANCE_886	pool11	2.56336	6.47875	-2.54719	3.75852	613.002	180.69	Fanconi anemia complementation group E
KDM1A	-0.500176	0.124244	1	0	KDM1A_2772	pool12	2.56129	3.42621	4.8204	-0.562732	3.25416	45.9918	lysine demethylase 1A
RFC2	-0.00930604	1.91009	0	1	RFC2_955	pool11	2.56109	-0.410528	2.91901	5.1748	2.44318	21.1209	replication factor C subunit 2
MLH3	-0.033014	0.850473	0	2	MLH3_5185	pool12	2.56057	-0.397635	3.14154	4.9378	218.928	238.008	mutL homolog 3
SLC30A9	-0.722391	0.3213	1	0	SLC30A9_2575	pool13	2.55794	0.427623	1.60549	5.64072	697.594	1700.05	solute carrier family 30 (zinc transporter), member 9
PSME3	-0.605373	0.300769	1	0	PSME3_2416	pool13	2.55648	0.296574	6.60507	0.767787	175.379	616.205	proteasome activator subunit 3
WRNIP1	-0.660747	0.0541377	2	1	WRNIP1_2540	pool12	2.55587	1.09765	6.61071	-0.0407418	335.76	696.981	Werner helicase interacting protein 1
TRIAP1	-0.0147532	1.92812	0	0	TRIAP1_198	pool11	2.55545	-0.636339	1.70716	6.59554	1240.9	1855.15	TP53 regulated inhibitor of apoptosis 1
FANCD2	-0.290137	0.188626	1	0	FANCD2_1249	pool12	2.5552	0.388463	1.44504	5.83211	189.239	561.168	Fanconi anemia complementation group D2
RAD23A	-0.278519	0.358427	1	0	RAD23A_1062	pool13	2.55334	2.62818	-0.33295	5.3648	0.409162	28.4242	RAD23 homolog A, nucleotide excision repair protein
HMGA2	-0.267928	0.785686	1	0	HMGA2_364	pool13	2.55261	-0.396469	6.35306	1.70125	221.864	363.794	high mobility group AT-hook 2
PSMB5	-0.458795	0.0728864	0	0	PSMB5_771	pool13	2.55015	-4.57701	6.58245	5.64499	890.73	229.228	proteasome subunit beta 5
DEK	-0.159831	0.708409	0	0	DEK_405	pool11	2.55004	2.94047	2.00677	2.70286	202.635	1237.77	DEK proto-oncogene
FANCI	-0.272215	0.548674	1	0	FANCI_1280	pool11	2.54923	0.680305	6.07363	0.893758	259.213	710.676	Fanconi anemia complementation group I
HERC2	0	1.07058	0	1	HERC2_3697	pool13	2.54776	0.942549	5.46255	1.23817	169.583	443.914	HECT and RLD domain containing E3 ubiquitin protein ligase 2
TOPORS	-0.523603	0.636012	0	1	TOPORS_1644	pool12	2.54735	0.911212	0.391816	6.33904	293.015	690.45	topoisomerase I binding, arginine/serine-rich, E3 ubiquitin protein ligase
SNW1	-1.36251	-2.24413	2	0	SNW1_431	pool12	2.54609	0.687384	-0.279983	7.23086	52.6659	158.637	SNW domain containing 1
MSH5	-0.236572	0.477947	0	0	MSH5_1926	pool13	2.54359	0.114129	1.45605	6.06059	157.867	429.754	mutS homolog 5
CASP3	-0.0876185	0.691222	0	2	CASP3_1108	pool11	2.5433	1.96544	6.06084	-0.396372	1189.42	2804.59	caspase 3
FANCD2	-0.290137	0.188626	1	0	FANCD2_2330	pool12	2.54298	7.56956	0.059389	0	0.0719002	63.0758	Fanconi anemia complementation group D2
EGLN3	-0.245422	0.132356	0	1	EGLN3_1245	pool12	2.54081	0.362908	-0.117132	7.37664	266.631	780.362	egl-9 family hypoxia-inducible factor 3
BRCA1	-0.271322	0.31007	1	0	BRCA1_891	pool11	2.53851	2.35952	-0.697307	5.95332	249.759	329.785	breast cancer 1
RAD51L1	-0.145148	0.229516	0	0	RAD51L1_317	pool12	2.53761	1.2199	6.17924	0.213697	36.8679	145.016
ASCC3	-0.125634	0.323855	1	1	ASCC3_504	pool11	2.53565	-1.07099	2.55241	6.12553	758.525	1350.46	activating signal cointegrator 1 complex subunit 3
RBM38	-0.179339	0.598772	0	1	RBM38_1632	pool11	2.53217	7.30528	0.762586	-0.471366	248.51	248.066	RNA binding motif protein 38
ERCC4	-0.137451	0.310425	0	1	ERCC4_626	pool12	2.52532	-0.615142	2.37176	5.81935	134.758	186.876	excision repair cross-complementation group 4
TAF1	-0.297311	1.1549	0	0	TAF1_3437	pool13	2.52302	1.92074	5.78544	-0.137119	49.7027	171.029	TATA-box binding protein associated factor 1
E2F7	-0.706859	-0.23381	2	1	E2F7_442	pool12	2.52145	0.304489	1.32101	5.93885	391.47	735.47	E2F transcription factor 7
RBM14	-0.485585	-0.032031	2	0	RBM14_1420	pool12	2.51931	3.05984	6.24538	-1.7473	13.9494	184.139	RNA binding motif protein 14
MRPS26	-0.0335297	0.200315	0	1	MRPS26_516	pool12	2.51818	-2.60797	5.87923	4.28328	302.172	113.76	mitochondrial ribosomal protein S26
STK11	-0.225483	0.313811	0	1	STK11_1468	pool12	2.5123	-0.221373	1.65905	6.09922	313.596	593.366	serine/threonine kinase 11
PSMD8	-0.232028	0.291239	0	0	PSMD8_1227	pool12	2.51031	1.35724	5.98132	0.192365	40.0615	175.995	proteasome 26S subunit, non-ATPase 8
RBBP5	-1.31515	1.3363	0	0	RBBP5_2491	pool12	2.5056	1.20183	0.430593	5.88437	570.115	1257.49	retinoblastoma binding protein 5
HIC1	-1.8962	-1.32422	2	0	HIC1_2988	pool13	2.50388	0.917471	0.548648	6.04552	19.2283	110.169	hypermethylated in cancer 1
WAC	-0.22541	0.81051	0	0	WAC_1429	pool13	2.50324	0.465567	0.484277	6.55987	30.0803	125.438	WW domain containing adaptor with coiled-coil
SLX1A	-0.125286	0.581699	0	0	SLX1A_136	pool13	2.50188	1.25094	-0.907873	7.16256	38.8678	361.817	SLX1 homolog A, structure-specific endonuclease subunit
STK11	-0.225483	0.313811	0	1	STK11_3123	pool12	2.50139	2.17755	-1.42388	6.75051	474.947	497.084	serine/threonine kinase 11
FZR1	-0.561616	0.125518	2	0	FZR1_3141	pool13	2.49962	1.07384	5.39019	1.03483	164.769	395.046	fizzy/cell division cycle 20 related 1
PSMD8	-0.232028	0.291239	0	0	PSMD8_329	pool12	2.49664	-3.73844	6.7817	4.44667	211.407	196.967	proteasome 26S subunit, non-ATPase 8
PHLDA3	-0.0874591	0.355758	0	2	PHLDA3_964	pool12	2.49658	1.13855	-0.0607929	6.41197	121.057	293.552	pleckstrin homology like domain family A member 3
TLK2	-0.43368	0.185752	0	0	TLK2_921	pool13	2.49361	2.60175	1.96692	2.91216	29.3634	196.018	tousled like kinase 2
NDNL2	-0.234331	0.269379	0	1	NDNL2_1150	pool12	2.49249	0.328821	3.14581	4.00284	142.775	600.735
ING4	-0.234182	0.0609802	1	0	ING4_556	pool12	2.4821	0.752069	0.195054	6.49918	984.751	2108	inhibitor of growth family member 4
UNG	-0.000477987	4	0	3	UNG_1804	pool11	2.48155	3.33952	0.00135009	4.10377	70.5935	199.854	uracil DNA glycosylase
CDK7	-0.255472	0.65267	0	2	CDK7_605	pool12	2.47955	0.220137	5.43763	1.78088	239.971	724.488	cyclin-dependent kinase 7
RTEL1	-0.204746	0.26496	0	0	RTEL1_1140	pool12	2.47772	-2.85377	6.84533	3.44161	239.83	161.318	regulator of telomere elongation helicase 1
FANCC	-0.720561	-0.333857	2	0	FANCC_1073	pool12	2.47604	-0.929605	1.92693	6.43078	314.797	359.136	Fanconi anemia complementation group C
SOX4	-0.157079	0.721018	0	1	SOX4_2298	pool11	2.47569	1.69498	3.83039	1.90169	125.549	718.704	SRY-box 4
BRCC3	-0.443456	0.011664	0	0	BRCC3_494	pool13	2.47497	-1.62179	5.83161	3.21509	41.2625	96.2814	BRCA1/BRCA2-containing complex subunit 3
SGK1	-0.896196	0.219827	1	0	SGK1_832	pool12	2.47313	0.879335	0.586288	5.95378	58.6063	143.533	serum/glucocorticoid regulated kinase 1
AEN	-0.165706	0.515985	0	1	AEN_2404	pool11	2.46976	-0.023821	4.18502	3.24809	23.4653	99.588	apoptosis enhancing nuclease
UHRF1	-0.0184985	0.796152	0	1	UHRF1_1675	pool12	2.46863	-0.124709	2.91077	4.61984	37.3895	47.6247	ubiquitin-like with PHD and ring finger domains 1
TDG	-0.186753	0.686766	0	0	TDG_2347	pool11	2.46846	1.91006	5.95469	-0.459378	588.809	1419.8	thymine DNA glycosylase
FAN1	-1.73049	0.79915	0	0	FAN1_1438	pool13	2.46234	1.17037	2.83953	3.37712	178.991	850.617	FANCD2/FANCI-associated nuclease 1
NEIL3	-0.167172	0.397181	0	0	NEIL3_641	pool11	2.46125	3.3621	3.0656	0.956034	64.4731	320.89	nei like DNA glycosylase 3
NSMCE2	-0.45892	-0.00528701	0	0	NSMCE2_243	pool12	2.46111	1.34221	6.00606	0.0350708	16.8532	81.8465	NSE2/MMS21 homolog, SMC5-SMC6 complex SUMO ligase
GTSE1	-0.147154	0.54546	1	1	GTSE1_1039	pool11	2.4611	4.16179	-0.133147	3.35465	368.175	838.69	G2 and S-phase expressed 1
MAPK14	-0.236497	0.295078	0	2	MAPK14_941	pool12	2.46077	-1.43585	2.12324	6.69492	288.654	543.802	mitogen-activated protein kinase 14
BTG2	-0.217527	0.169475	0	1	BTG2_1806	pool12	2.45836	1.375	0.278596	5.72149	215.146	453.06	BTG family member 2
RFC5	-0.044649	0.784362	0	1	RFC5_459	pool11	2.45677	7.69086	-0.903854	0.58332	2235.67	2722.12	replication factor C subunit 5
RBM14	-0.485585	-0.032031	2	0	RBM14_1281	pool12	2.45587	0.0589516	1.36355	5.94511	405.095	827.636	RNA binding motif protein 14
SMUG1	-0.202594	0.344094	0	1	SMUG1_1278	pool12	2.4489	0.0684576	0.220876	7.05736	713.863	1155.18	single-strand-selective monofunctional uracil-DNA glycosylase 1
PSMD13	-0.1673	2.27572	0	0	PSMD13_1428	pool11	2.44768	7.1381	0.204935	0	0	46.6701	proteasome 26S subunit, non-ATPase 13
OBFC2B	-0.203981	0.27556	0	1	OBFC2B_203	pool12	2.44713	1.00962	0.908387	5.4234	103.157	249.783
C9orf119	-0.572676	-0.287519	2	0	C9orf119_942	pool12	2.44555	0.582994	0.743818	6.00984	540.839	1252.88
TAOK1	-0.24306	0.203912	0	0	TAOK1_421	pool12	2.44553	-0.689313	2.48721	5.53871	374.656	634.676	TAO kinase 1
PSMD9	-0.111091	0.859492	1	0	PSMD9_2130	pool11	2.44533	3.30038	4.08131	-0.0456881	0.184477	10.1381	proteasome 26S subunit, non-ATPase 9
RAD21L1	-2.72125	-0.792366	1	0	RAD21L1_675	pool13	2.44414	2.30044	6.12123	-1.08926	238.776	497.016	RAD21 cohesin complex component like 1
PSMA3	-0.437469	-0.120044	2	1	PSMA3_780	pool12	2.44341	0.371958	1.3502	5.60806	1190.2	2997.19	proteasome subunit alpha 3
RNF169	-0.572514	0.0512937	1	1	RNF169_588	pool12	2.44338	2.75884	0.508779	4.06254	145.889	697.495	ring finger protein 169
PSMA6	-0.0443122	0.800245	0	2	PSMA6_170	pool12	2.44267	-6.26366	7.25124	6.34044	75.2679	207.848	proteasome subunit alpha 6
NEIL2	-0.486383	0.354971	1	0	NEIL2_1565	pool13	2.44213	-0.925473	5.32456	2.92732	252.251	407.641	nei like DNA glycosylase 2
DMAP1	-1.83863	0.248259	2	0	DMAP1_99	pool13	2.44203	0.0732166	5.97906	1.27381	110.065	223.574	DNA methyltransferase 1 associated protein 1
CD44	-0.0711946	1.29499	1	2	CD44_496	pool11	2.44064	5.94587	0.646436	0.72961	34.1781	172.783	CD44 molecule (Indian blood group)
PNKP	-0.266482	0.0272882	0	0	PNKP_678	pool12	2.43955	2.6652	-1.11471	5.76817	66.6335	97.1764	polynucleotide kinase 3'-phosphatase
DDX5	-1.22695	-0.541967	1	0	DDX5_2086	pool12	2.43687	2.44603	-0.200286	5.06488	452.968	659.447	DEAD-box helicase 5
ACTR5	-0.379032	-0.129245	1	0	ACTR5_1037	pool12	2.43686	-1.26238	2.91562	5.65734	446.979	552.277	ARP5 actin-related protein 5 homolog (yeast)
FANCD2	-0.290137	0.188626	1	0	FANCD2_1774	pool12	2.4334	-0.15209	1.53726	5.91503	593.619	948.696	Fanconi anemia complementation group D2
EP300	-0.262728	0.238222	0	1	EP300_8487	pool12	2.42906	0.294954	0.258052	6.73417	349.689	820.912	E1A binding protein p300
RAD51L3	-0.189767	0.613144	1	1	RAD51L3_1789	pool13	2.42847	5.12057	-0.219695	2.38454	219.436	273.344
CDKN1B	-0.201211	0.272052	0	2	CDKN1B_2008	pool12	2.42562	0.57376	1.33672	5.36639	292.111	722.509	cyclin-dependent kinase inhibitor 1B (p27, Kip1)
ASF1A	-0.330683	-0.0829148	0	0	ASF1A_1322	pool12	2.42321	0.131863	0.538615	6.59915	1297.01	2481.91	anti-silencing function 1A histone chaperone
YAP1	-0.168834	1.50307	0	1	YAP1_2155	pool11	2.42283	9.22619	-2.69974	0.742032	1634.56	1001.99	Yes associated protein 1
PGAP2	-0.20128	0.430626	0	0	PGAP2_615	pool12	2.42193	0.733905	0.705739	5.82615	201.819	432.74	post-GPI attachment to proteins 2
RFC2	-0.00930604	1.91009	0	1	RFC2_956	pool11	2.42187	2.63273	4.25336	0.379523	183.729	492.483	replication factor C subunit 2
PSMD6	-0.022185	1.27654	0	1	PSMD6_1122	pool13	2.41939	-0.30738	5.18083	2.38472	191.564	304.069	proteasome 26S subunit, non-ATPase 6
HUWE1	-0.383	0.154096	1	0	HUWE1_7739	pool13	2.41771	1.12265	5.64562	0.484854	131.216	264.773	HECT, UBA and WWE domain containing 1, E3 ubiquitin protein ligase
XRCC3	-0.190373	0.323855	1	2	XRCC3_320	pool12	2.4176	0.980611	0.283459	5.98872	291.51	568.3	X-ray repair complementing defective repair in Chinese hamster cells 3
ATRX	-1.04769	1.23582	2	0	ATRX_1941	pool13	2.41395	0.345185	7.0974	-0.200733	189.136	310.209	alpha thalassemia/mental retardation syndrome X-linked
CXCL12	-0.0597824	1.51286	0	0	CXCL12_294	pool13	2.41133	2.75688	6.58321	-2.10609	53.3283	136.414	chemokine (C-X-C motif) ligand 12
PSMD3	-0.278107	0.352226	0	0	PSMD3_1545	pool12	2.40908	0.508809	0.0727863	6.64563	486.743	1103.69	proteasome 26S subunit, non-ATPase 3
HUS1	-0.22439	0.0921589	0	1	HUS1_2698	pool12	2.4089	-0.0794385	1.63229	5.67384	1020.87	1918.57	HUS1 checkpoint clamp component
POLR2A	-0.49026	0.464453	1	0	POLR2A_3961	pool13	2.40878	4.16631	1.00504	2.05498	93.3664	388.677	polymerase (RNA) II (DNA directed) polypeptide A, 220kDa
TYMS	-0.197295	0.287266	1	0	TYMS_1147	pool11	2.40808	2.28789	5.43712	-0.500771	967.282	1356.84	thymidylate synthetase
CINP	-0.365221	0.0382468	0	0	CINP_165	pool12	2.40572	-0.880913	2.10714	5.99094	803.945	1427.93	cyclin-dependent kinase 2 interacting protein
MAPKAPK2	-0.328457	-0.0345631	0	0	MAPKAPK2_1394	pool12	2.40262	1.3245	-0.621191	6.50456	661.077	1129.73	mitogen-activated protein kinase-activated protein kinase 2
MDM2	-0.339799	0.220837	1	2	MDM2_1457	pool12	2.4025	0.174327	0.721101	6.31206	216.28	430.254	MDM2 proto-oncogene, E3 ubiquitin protein ligase
MAEL	-0.09442	0.982967	0	1	MAEL_644	pool13	2.40049	1.60785	6.83144	-1.23783	23.4366	143.95	maelstrom spermatogenic transposon silencer
MRPS35	-0.251657	0.765483	2	0	MRPS35_1514	pool13	2.3969	-1.00359	1.83858	6.3557	108.907	222.463	mitochondrial ribosomal protein S35
PSMD13	-0.1673	2.27572	0	0	PSMD13_621	pool11	2.38983	7.57161	-0.402109	0	0.107146	63.077	proteasome 26S subunit, non-ATPase 13
CEP63	-0.574955	0.121823	0	0	CEP63_1288	pool13	2.38924	-0.154855	6.14571	1.17687	56.4258	207.608	centrosomal protein 63kDa
CCNK	-0.42159	-0.0968015	1	0	CCNK_636	pool12	2.38904	1.585	-1.2516	6.8337	219.003	341.311	cyclin K
SMC2	-0.00917295	2.50864	0	2	SMC2_1401	pool11	2.38406	-0.922585	0.543896	7.53087	0.530495	104.368	structural maintenance of chromosomes 2
EME2	-1.39794	-0.0258108	2	0	EME2_1113	pool13	2.38221	7.19667	-0.327559	0.277507	9.6797	82.0929	essential meiotic structure-specific endonuclease subunit 2
PSMA8	-1.55909	-0.17607	1	0	PSMA8_517	pool13	2.38064	-0.0980335	0.373524	6.86642	29.9353	94.6445	proteasome subunit alpha 8
USP3	-0.0540393	0.741602	0	2	USP3_2305	pool11	2.37951	0.882574	5.45221	0.80374	243.312	631.343	ubiquitin specific peptidase 3
POLM	-0.156705	1.61261	0	1	POLM_288	pool11	2.37936	8.08146	-0.648774	-0.294595	0.682747	117.126	polymerase (DNA directed), mu
PSMF1	-0.090337	0.857611	0	0	PSMF1_1151	pool11	2.37881	5.97142	2.76398	-1.59897	31.4208	244.525	proteasome inhibitor subunit 1
SMARCB1	-1.25964	-0.732594	1	0	SMARCB1_442	pool12	2.37877	-0.901222	7.06352	0.97401	208.895	534.443	SWI/SNF related, matrix associated, actin dependent regulator of chromatin, subfamily b, member 1
PPP4R2	-0.844664	-0.0468688	2	0	PPP4R2_375	pool13	2.37802	0.639869	5.97461	0.519571	120.559	296.566	protein phosphatase 4 regulatory subunit 2
UVRAG	-1.82102	0.0484682	1	0	UVRAG_3998	pool13	2.37779	-0.0365356	5.51108	1.65881	73.9619	127.817	UV radiation resistance associated
ASTE1	-0.0715529	0.743282	0	1	ASTE1_553	pool11	2.37255	2.46175	2.42198	2.23393	51.6431	266.707	asteroid homolog 1 (Drosophila)
POLG2	-0.00939479	1.31605	0	2	POLG2_558	pool11	2.3718	5.26889	-4.90769	6.7542	340.883	148.283	polymerase (DNA directed), gamma 2, accessory subunit
CRY2	-0.236123	0.762205	0	0	CRY2_1065	pool13	2.37042	-1.85561	5.12874	3.83813	78.9271	61.398	cryptochrome circadian clock 2
RINT1	-0.128252	0.578725	0	1	RINT1_335	pool11	2.37015	3.85108	3.35607	-0.0966922	655.355	1300.05	RAD50 interactor 1
RAD51	-0.176265	0.674279	1	0	RAD51_1236	pool11	2.36796	2.08865	-1.282	6.29724	1055.95	1719.44	RAD51 recombinase
IRF3	-0.242225	0.31894	0	0	IRF3_324	pool12	2.36749	-1.00056	1.64026	6.46278	458.92	776.097	interferon regulatory factor 3
ABL1	-0.000782434	0.954677	0	1	ABL1_1726	pool11	2.36748	0.921009	5.52736	0.654064	23.009	69.2062	ABL proto-oncogene 1, non-receptor tyrosine kinase
TREX1	-0.682354	-0.259322	3	1	TREX1_1465	pool12	2.36681	-0.246493	0.883632	6.46329	810.551	1475.74	three prime repair exonuclease 1
NKX3-1	-0.0438796	0.862963	1	0	NKX3-1_1069	pool13	2.36628	-0.234714	2.55831	4.77526	96.7934	258.738	NK3 homeobox 1
PSME4	-0.00449643	0.932557	0	2	PSME4_1808	pool11	2.36531	1.73192	5.40071	-0.0366989	1597.73	2528.43	proteasome activator subunit 4
PSMA4	-0.10111	1.25337	1	3	PSMA4_524	pool11	2.36283	2.47218	5.81117	-1.19487	449.858	851.62	proteasome subunit alpha 4
POLR2A	-0.49026	0.464453	1	0	POLR2A_1204	pool13	2.36104	0.952827	6.29172	-0.161433	99.3053	226.965	polymerase (RNA) II (DNA directed) polypeptide A, 220kDa
ERCC2	-0.481223	0.399681	1	0	ERCC2_192	pool13	2.35776	1.20885	3.3731	2.49134	103.121	603.31	excision repair cross-complementation group 2
FANCG	-0.39545	0.157204	1	0	FANCG_216	pool11	2.35649	8.6071	-0.987734	-0.549901	0.682747	168.497	Fanconi anemia complementation group G
PML	-0.159329	0.491066	0	0	PML_1331	pool12	2.35448	0	0.616903	6.44653	0.245688	50.3449	promyelocytic leukemia
CETN2	-0.153663	0.544242	1	0	CETN2_593	pool11	2.35159	3.48827	3.3273	0.239206	909.372	2525.13	centrin 2
PSMF1	-0.090337	0.857611	0	0	PSMF1_3105	pool11	2.35109	1.34878	-1.16464	6.86913	1316.38	1688.4	proteasome inhibitor subunit 1
USP10	-0.452471	0.470313	0	1	USP10_2444	pool13	2.35069	-5.55567	6.70652	5.90122	19.3024	169.803	ubiquitin specific peptidase 10
FANCE	-0.05532	1.21183	0	0	FANCE_982	pool11	2.34811	0.58016	6.21406	0.250112	202.187	619.012	Fanconi anemia complementation group E
MRPS11	-2.24413	0.505985	0	0	MRPS11_577	pool12	2.34659	1.14769	6.89878	-1.00668	117.366	378.461	mitochondrial ribosomal protein S11
AP5S1	-0.152242	0.390086	0	0	AP5S1_1717	pool12	2.34586	7.8944	-0.856816	0	0.574649	113.149	adaptor related protein complex 5 sigma 1 subunit
INO80E	-0.174639	0.219827	0	0	INO80E_118	pool12	2.34294	-1.15002	3.29338	4.88545	17.6502	27.3754	INO80 complex subunit E
PARP1	-0.978811	0.160208	0	0	PARP1_3450	pool12	2.34199	0.790911	-0.338123	6.57318	823.617	1392.86	poly(ADP-ribose) polymerase 1
C1orf124	-0.275069	0.161214	0	2	C1orf124_2514	pool12	2.34003	0.222083	0.172231	6.62577	1657.96	3330.4
POLR2L	-0.0713482	0.467118	0	2	POLR2L_377	pool12	2.33929	-0.670615	1.23135	6.45713	400.448	648.213	polymerase (RNA) II (DNA directed) polypeptide L, 7.6kDa
BBC3	-0.615109	0.232621	0	0	BBC3_970	pool13	2.33834	-1.15318	0.996097	7.17209	112.611	346.956	BCL2 binding component 3
FANCA	-0.378097	0.331894	1	2	FANCA_297	pool12	2.33484	0.241478	-0.165431	6.92847	380.064	901.771	Fanconi anemia complementation group A
SMC1B	-1.19928	-0.0287706	1	0	SMC1B_2182	pool13	2.33373	-1.9409	6.08499	2.8571	144.96	518.559	structural maintenance of chromosomes 1B
OBFC2A	-0.480566	-0.0213631	0	1	OBFC2A_3291	pool12	2.32881	-1.40924	1.37766	7.01801	657.401	1457.27
UPF1	-0.352421	-0.0854453	1	0	UPF1_4234	pool12	2.32609	0.892605	-0.535447	6.6211	1227.54	1992.36	UPF1 regulator of nonsense transcripts homolog (yeast)
SNAI2	0	1.47237	1	2	SNAI2_1565	pool11	2.32158	2.35023	6.27561	-1.66109	220.185	519.445	snail family zinc finger 2
POLM	-0.156705	1.61261	0	1	POLM_2129	pool11	2.32098	0.833897	-1.15164	7.28068	1328.74	2465.86	polymerase (DNA directed), mu
MUS81	-0.157017	0.767512	1	0	MUS81_2290	pool11	2.32025	3.81006	1.07615	2.07455	225.041	858.536	MUS81 structure-specific endonuclease subunit
INTS7	-1.54821	-1.68613	2	0	INTS7_650	pool12	2.31671	-0.322663	1.45	5.82278	805.224	1402.95	integrator complex subunit 7
IKBKG	-1.54061	0.769296	0	0	IKBKG_286	pool13	2.3162	0.192318	0.174167	6.58212	18.2073	67.7678	inhibitor of kappa light polypeptide gene enhancer in B-cells, kinase gamma
PPP2R5C	-0.795337	-0.14917	0	0	PPP2R5C_795	pool12	2.31321	1.5407	-0.962535	6.36146	86.2445	171.337	protein phosphatase 2 regulatory subunit B', gamma
PSMA7	-0.353302	0.113961	0	0	PSMA7_795	pool11	2.31286	4.26357	-4.0107	6.68571	885.558	348.145	proteasome subunit alpha 7
UBA52	-0.222646	0.142125	0	1	UBA52_1731	pool11	2.31094	5.69632	0.766476	0.470039	426.753	648.972	ubiquitin A-52 residue ribosomal protein fusion product 1
RNF8	-0.485054	0.953505	0	0	RNF8_2005	pool13	2.30983	-1.10279	6.64564	1.38664	203.963	523.489	ring finger protein 8, E3 ubiquitin protein ligase
RIF1	-0.102098	0.743763	0	1	RIF1_3604	pool12	2.3094	1.69287	6.02882	-0.793499	343.307	585.954	replication timing regulatory factor 1
POLD1	-0.00230788	1.40671	0	0	POLD1_2232	pool11	2.30892	2.1781	3.11119	1.63747	223.568	961.192	polymerase (DNA directed), delta 1, catalytic subunit
APBB1	-0.311491	1.00789	2	1	APBB1_1292	pool13	2.30427	4.7061	2.00167	0.20503	91.3666	325.227	amyloid beta precursor protein binding family B member 1
APTX	-0.205582	0.318307	0	0	APTX_758	pool12	2.30089	0.00827723	-0.103105	6.99751	389.389	709.844	aprataxin
LIG1	-0.145937	0.2522	1	1	LIG1_1384	pool11	2.29983	2.29409	5.60807	-1.00267	1157.93	1470.25	ligase I, DNA, ATP-dependent
KAT5	-2.65758	-0.189835	1	0	KAT5_1019	pool13	2.29836	2.9643	5.04075	-1.10997	384.21	319.714	lysine acetyltransferase 5
IER3	-0.166853	0.522589	0	2	IER3_933	pool12	2.29614	0.258808	0.381699	6.24792	107.709	233.694	immediate early response 3
RIF1	-0.102098	0.743763	0	1	RIF1_8911	pool12	2.29283	0.844781	-0.38552	6.41923	694.303	1386.98	replication timing regulatory factor 1
CLU	-1.09098	-0.713319	2	1	CLU_1844	pool12	2.28965	-0.771106	2.19958	5.44049	228.653	554.441	clusterin
ABL1	-0.000782434	0.954677	0	1	ABL1_1729	pool11	2.2894	-2.08404	3.16824	5.784	5.43239	98.5395	ABL proto-oncogene 1, non-receptor tyrosine kinase
PPP4C	0	1.1831	1	2	PPP4C_273	pool11	2.28901	7.97441	-1.36908	0.261705	2186.24	1376.08	protein phosphatase 4 catalytic subunit
CCNA2	-0.0256726	1.72816	0	4	CCNA2_2073	pool11	2.28816	8.42772	-1.01914	-0.544093	2467.67	1828.71	cyclin A2
POLR2I	-1.41794	-0.623971	3	0	POLR2I_596	pool13	2.2855	7.95029	-0.327559	-0.766218	0.495691	82.2324	polymerase (RNA) II (DNA directed) polypeptide I, 14.5kDa
ERCC8	-0.370896	-0.398049	1	0	ERCC8_772	pool11	2.2842	6.06386	-4.41663	5.20537	628.161	97.22	excision repair cross-complementation group 8
POLD4	0	1.41794	0	3	POLD4_711	pool11	2.28273	-0.492972	2.99065	4.35049	51.9656	53.2523	polymerase (DNA-directed), delta 4, accessory subunit
ACTR5	-0.379032	-0.129245	1	0	ACTR5_1653	pool12	2.28099	1.43817	-0.191392	5.59618	460.29	624.823	ARP5 actin-related protein 5 homolog (yeast)
UBE2N	-1.73755	0.803547	0	0	UBE2N_615	pool13	2.27968	0.65903	4.06337	2.11665	264.562	1092.43	ubiquitin conjugating enzyme E2N
MASTL	-0.649171	-0.175809	1	0	MASTL_1457	pool12	2.27943	-0.830762	2.15856	5.5105	776.109	1026.92	microtubule associated serine/threonine kinase like
MORF4L1	-0.674895	0.901702	1	0	MORF4L1_1537	pool13	2.27331	0.478838	4.65358	1.68752	25.2075	159.719	mortality factor 4 like 1
FANCL	-0.333388	0.118558	0	0	FANCL_210	pool12	2.26804	-0.342334	1.04917	6.09729	321.642	610.814	Fanconi anemia complementation group L
CUL4B	-0.094906	0.413638	0	0	CUL4B_4481	pool11	2.26442	2.75455	-1.58259	5.62129	1368.63	1666.55	cullin 4B
PSMB6	-0.344381	-0.160208	0	0	PSMB6_759	pool12	2.26148	1.12455	-0.388987	6.04887	499.454	704.447	proteasome subunit beta 6
PCNA	-0.219107	0.263285	1	0	PCNA_511	pool11	2.25999	6.31974	0.204935	0.255305	0	26.4084	proliferating cell nuclear antigen
CASP2	-0.168642	0.670602	0	1	CASP2_2262	pool11	2.25927	4.62104	2.17109	-0.014316	1086.57	2052.89	caspase 2
INO80C	-0.319211	0.469032	0	0	INO80C_722	pool13	2.25798	-0.350957	1.20198	5.92292	220.643	568.707	INO80 complex subunit C
POLR2K	-1.21325	-0.341512	1	0	POLR2K_541	pool13	2.25661	1.16502	0.616014	4.98879	400.604	797.177	polymerase (RNA) II (DNA directed) polypeptide K, 7.0kDa
FMN2	-1.44129	0.269783	2	0	FMN2_5839	pool13	2.25199	0.526324	6.28075	-0.0511164	814.031	1334.77	formin 2
E2F1	-0.246417	0.380907	0	0	E2F1_2681	pool12	2.25192	-0.981715	3.95501	3.78246	276.395	600.963	E2F transcription factor 1
ASF1A	-0.330683	-0.0829148	0	0	ASF1A_1286	pool12	2.25083	2.51626	-2.29815	6.53439	1010.75	932.398	anti-silencing function 1A histone chaperone
RPS27L	-0.040577	1.01682	0	0	RPS27L_475	pool11	2.25018	6.71504	-0.0244386	0.0599337	2113.53	2890.93	ribosomal protein S27 like
RFWD2	-0.237772	0.100672	0	0	RFWD2_1297	pool12	2.24776	0.103345	6.69534	-0.0553967	730.029	1067.53	ring finger and WD repeat domain 2, E3 ubiquitin protein ligase
FANCM	-0.166025	0.233215	0	2	FANCM_6498	pool12	2.2463	-0.266268	1.23268	5.77249	995.984	1666.04	Fanconi anemia complementation group M
HUS1	-0.22439	0.0921589	0	1	HUS1_285	pool12	2.24627	-0.454078	0.848292	6.3446	5.58665	31.0107	HUS1 checkpoint clamp component
TMEM161A	-0.167683	0.509199	0	1	TMEM161A_130	pool11	2.24588	6.10457	5.22361	-4.59055	59.7305	73.4093	transmembrane protein 161A
CDCA5	-0.0721679	0.347077	0	0	CDCA5_1552	pool12	2.24519	2.52321	-1.29123	5.50361	839.611	863.411	cell division cycle associated 5
RNF168	-0.52739	0.127844	2	0	RNF168_3255	pool13	2.24255	1.17124	6.18167	-0.625256	213.116	483.362	ring finger protein 168, E3 ubiquitin protein ligase
FANCI	-0.272215	0.548674	1	0	FANCI_2189	pool11	2.23229	3.10328	0.589525	3.00408	235.036	705.883	Fanconi anemia complementation group I
ERCC5	-0.224026	0.17744	0	2	ERCC5_1613	pool12	2.22953	0.664689	0.618563	5.40533	29.6823	80.7459	excision repair cross-complementation group 5
FOXM1	-0.309627	0.203564	0	0	FOXM1_1812	pool11	2.22679	1.24356	5.79871	-0.3619	578.611	1042.92	forkhead box M1
POLR2J	-0.0238335	0.955068	0	1	POLR2J_162	pool11	2.22529	1.37931	2.30949	2.98706	96.0191	315.861	polymerase (RNA) II (DNA directed) polypeptide J, 13.3kDa
NHEJ1	-0.321391	0.139004	1	0	NHEJ1_2057	pool13	2.22408	0.475848	1.59475	4.60165	300.446	708.859	non-homologous end joining factor 1
MAPK1	-1.69465	0.425506	1	0	MAPK1_784	pool13	2.22275	1.02406	4.32355	1.32066	49.0841	313.592	mitogen-activated protein kinase 1
UCHL5	-2.55284	0.66354	1	0	UCHL5_1045	pool13	2.22199	1.61104	-0.490755	5.54569	88.3829	285.978	ubiquitin C-terminal hydrolase L5
RUVBL1	-0.209433	0.426085	1	2	RUVBL1_906	pool11	2.22184	4.21436	0.590643	1.86053	2.32992	38.2215	RuvB like AAA ATPase 1
RFC5	-0.044649	0.784362	0	1	RFC5_1490	pool11	2.21931	1.13545	5.55208	-0.0296129	265.657	466.47	replication factor C subunit 5
MSH3	-0.194363	0.193074	0	1	MSH3_2502	pool12	2.21929	-0.178959	0.37903	6.4578	253.055	390.288	mutS homolog 3
NEIL2	-0.486383	0.354971	1	0	NEIL2_1684	pool13	2.21864	-0.915385	6.58719	0.984125	221.248	409.029	nei like DNA glycosylase 2
TAOK2	-2.46852	0.376647	2	0	TAOK2_1717	pool13	2.21592	1.36551	5.61938	-0.337129	101.087	195.766	TAO kinase 2
TP73	-0.288952	0.672233	0	0	TP73_1972	pool13	2.21296	2.33609	4.85526	-0.552466	303.366	614.591	tumor protein p73
DDX1	-0.148497	0.470826	1	0	DDX1_606	pool13	2.21042	0.354839	1.71893	4.5575	98.8654	287.755	DEAD/H-box helicase 1
MCL1	-0.00471589	0.798057	0	2	MCL1_1421	pool11	2.20954	1.09322	6.24314	-0.707743	52.7152	170.299	myeloid cell leukemia 1
POLR2F	-0.327717	-0.0323116	0	1	POLR2F_1308	pool12	2.20789	0.614817	-0.262093	6.27095	176.587	298.631	polymerase (RNA) II (DNA directed) polypeptide F
MSH6	-0.146606	0.216597	1	1	MSH6_805	pool11	2.20637	1.48753	5.51748	-0.385902	599.741	1096.91	mutS homolog 6
PPP4C	0	1.1831	1	2	PPP4C_819	pool11	2.20626	3.05871	3.30477	0.255305	5.7787	53.7849	protein phosphatase 4 catalytic subunit
POLE	-0.00322573	0.778847	0	3	POLE_1113	pool12	2.20416	2.02153	-0.771125	5.36207	168.904	230.359	polymerase (DNA directed), epsilon, catalytic subunit
CASP2	-0.168642	0.670602	0	1	CASP2_2493	pool11	2.20412	8.32694	2.27949	-3.99406	244.706	480.884	caspase 2
RPS27L	-0.040577	1.01682	0	0	RPS27L_289	pool11	2.20201	4.9922	-0.348007	1.96184	377.628	486.852	ribosomal protein S27 like
HMOX1	-0.042297	1.29671	0	2	HMOX1_1451	pool11	2.20168	1.6551	4.94287	0.00706189	1087.79	2039.81	heme oxygenase 1
NEIL2	-0.486383	0.354971	1	0	NEIL2_436	pool13	2.20161	0.593627	5.8574	0.153811	10.3799	38.8855	nei like DNA glycosylase 2
TLK1	-0.594483	-0.00252624	1	0	TLK1_1194	pool13	2.20061	0.126864	6.59189	-0.116926	294.483	586.462	tousled like kinase 1
FOXO4	-0.643401	0.0972902	2	0	FOXO4_705	pool13	2.19773	2.06985	7.3036	-2.78027	129.01	170.933	forkhead box O4
CLOCK	-0.344765	1.22475	0	0	CLOCK_294	pool13	2.19735	1.22904	0.303876	5.05912	159.227	669.987	clock circadian regulator
FNIP2	-1.16877	0.031377	1	0	FNIP2_422	pool13	2.19472	0.220687	0.520096	5.84337	93.5937	169.574	folliculin interacting protein 2
INTS7	-1.54821	-1.68613	2	0	INTS7_2318	pool12	2.19315	0.532986	-0.421036	6.46752	478.845	957.766	integrator complex subunit 7
PSME2	-0.277119	0.287771	0	1	PSME2_283	pool11	2.18877	0.297416	5.94208	0.326816	286.229	710.781	proteasome activator subunit 2
PSMB4	-0.0874591	0.360613	0	2	PSMB4_883	pool11	2.18738	2.14575	5.25555	-0.839168	599.465	761.816	proteasome subunit beta 4
POLD2	-0.00296329	1.1549	0	1	POLD2_1235	pool11	2.18456	2.17589	6.02075	-1.64296	57.9942	488.165	polymerase (DNA directed), delta 2, accessory subunit
CDKN2A	-1.14813	-0.0106837	0	0	CDKN2A_757	pool12	2.18247	0.287874	-0.0416716	6.30121	701.355	1116.56	cyclin-dependent kinase inhibitor 2A
PSMD5	-0.572352	-0.147093	1	1	PSMD5_1653	pool12	2.18235	0.842013	6.15774	-0.452712	981.275	1223.82	proteasome 26S subunit, non-ATPase 5
WRN	-0.30777	0.00974997	1	0	WRN_5722	pool11	2.18086	2.95888	6.12213	-2.53842	996.257	1245.2	Werner syndrome RecQ like helicase
C1orf124	-0.275069	0.161214	0	2	C1orf124_589	pool12	2.1791	-0.406266	0.0660311	6.87753	266.256	487.69
RAD23A	-0.278519	0.358427	1	0	RAD23A_1744	pool13	2.17869	-0.455681	0.771663	6.22008	162.603	225.193	RAD23 homolog A, nucleotide excision repair protein
INTS7	-1.54821	-1.68613	2	0	INTS7_1126	pool12	2.17463	0.650517	5.9564	-0.0830242	0.0818959	20.6135	integrator complex subunit 7
RAD9A	-0.247952	1.29843	0	0	RAD9A_1858	pool11	2.17375	0.957763	1.35918	4.2043	201.933	811.475	RAD9 checkpoint clamp component A
ING2	-0.947306	-0.298087	1	0	ING2_1042	pool12	2.17288	0.0238694	0.910535	5.58423	1122.87	2500.61	inhibitor of growth family member 2
C17orf70	-0.0884695	0.693575	0	1	C17orf70_1417	pool12	2.17138	2.74503	-3.07742	6.84654	58.0341	107.774
ATRIP	-0.188961	0.414878	0	1	ATRIP_697	pool12	2.17097	-1.51276	1.89713	6.12853	565.523	669.349	ATR interacting protein
DCLRE1B	-0.113453	0.50404	0	1	DCLRE1B_1581	pool11	2.1691	1.53596	2.66239	2.30895	141.164	599.099	DNA cross-link repair 1B
PCNA	-0.219107	0.263285	1	0	PCNA_670	pool11	2.16457	-3.36952	6.06092	3.80231	51.4831	433.406	proliferating cell nuclear antigen
SSRP1	-0.280337	0.956638	1	0	SSRP1_2321	pool11	2.16126	1.34572	4.87601	0.262036	615.998	955.232	structure specific recognition protein 1
KIAA0415	-0.328179	-0.615647	1	0	KIAA0415_2082	pool12	2.15744	6.01351	2.43213	-1.97332	104.384	96.8679
PSMC1	-0.0144837	1.00261	0	0	PSMC1_223	pool13	2.15428	-0.475042	5.26046	1.67742	38.3576	50.443	proteasome 26S subunit, ATPase 1
ASCC3	-0.125634	0.323855	1	1	ASCC3_465	pool11	2.15201	2.68904	2.11022	1.65678	538.15	2182.53	activating signal cointegrator 1 complex subunit 3
PSMB9	-0.193616	0.193345	0	0	PSMB9_845	pool11	2.14772	2.34827	-2.37619	6.4711	541.383	388.564	proteasome subunit beta 9
PHLDA3	-0.0874591	0.355758	0	2	PHLDA3_686	pool12	2.14532	1.02498	-1.12751	6.53849	793.157	1049.41	pleckstrin homology like domain family A member 3
MRPS9	-0.31078	0.46382	1	0	MRPS9_793	pool13	2.14449	3.17515	2.44924	0.809076	88.4559	307.423	mitochondrial ribosomal protein S9
POLI	-0.25321	0.714218	0	0	POLI_5001	pool11	2.13965	2.86683	3.55212	0	0.107146	6.93163	polymerase (DNA directed) iota
FBXO45	-0.247798	0.615467	0	0	FBXO45_2170	pool13	2.13961	0.357413	5.88512	0.176292	383.69	637.731	F-box protein 45
PARG	-0.382057	0.313811	1	0	PARG_1778	pool13	2.13918	1.32872	-0.0995846	5.1884	218.614	683.482	poly(ADP-ribose) glycohydrolase
POLA1	-0.0167346	2.25181	1	2	POLA1_716	pool11	2.13825	-5.71589	6.25057	5.88007	25.5429	139.918	polymerase (DNA directed), alpha 1, catalytic subunit
PSMB9	-0.193616	0.193345	0	0	PSMB9_919	pool11	2.13574	7.56063	-1.27963	0.12623	820.69	960.318	proteasome subunit beta 9
RDM1	-0.117191	0.519418	0	2	RDM1_199	pool12	2.13523	-0.673053	6.74995	0.328793	188.119	302.951	RAD52 motif containing 1
E2F7	-0.706859	-0.23381	2	1	E2F7_1593	pool12	2.13406	0.255495	0.53297	5.61373	944.877	1492.64	E2F transcription factor 7
TRIP13	-0.171276	0.552532	0	1	TRIP13_264	pool11	2.13273	5.79409	0.620829	-0.0167362	66.0228	83.717	thyroid hormone receptor interactor 13
TRIM28	-0.0146184	0.443818	0	1	TRIM28_1648	pool11	2.13229	-1.5219	0.416066	7.50269	22.7377	166.02	tripartite motif containing 28
UHRF1	-0.0184985	0.796152	0	1	UHRF1_3440	pool12	2.13171	0.772804	-0.421843	6.04416	776.492	1052.28	ubiquitin-like with PHD and ring finger domains 1
ACTR5	-0.379032	-0.129245	1	0	ACTR5_1685	pool12	2.13158	0.224096	-0.434921	6.60556	1070.47	1378.74	ARP5 actin-related protein 5 homolog (yeast)
PSMD12	-0.517412	0.270916	3	0	PSMD12_648	pool13	2.13083	0.128658	5.46523	0.798605	283.861	572.632	proteasome 26S subunit, non-ATPase 12
DYRK2	-0.188961	0.38563	1	3	DYRK2_4768	pool12	2.1289	0.151879	-0.00294793	6.23775	352.187	631.324	dual specificity tyrosine phosphorylation regulated kinase 2
EGFR	-0.0366845	1.01592	1	0	EGFR_1219	pool11	2.12806	-2.26787	4.45794	4.19411	4.16081	26.422	epidermal growth factor receptor
TMEM161A	-0.167683	0.509199	0	1	TMEM161A_1761	pool11	2.12746	0.655693	4.7735	0.953183	151.496	343.691	transmembrane protein 161A
XRCC6	-0.365624	0.0924274	0	2	XRCC6_1695	pool12	2.12278	-0.403379	-0.062631	6.83435	1583.35	2190.16	X-ray repair complementing defective repair in Chinese hamster cells 6
TIMELESS	-0.273517	0.194092	0	1	TIMELESS_4012	pool11	2.12265	2.91858	4.41437	-0.964992	956.752	969.457	timeless circadian clock
CDK9	-0.322758	0.120159	0	1	CDK9_1749	pool12	2.12006	-0.336961	-0.031127	6.72827	902.002	1222.21	cyclin-dependent kinase 9
YAP1	-0.168834	1.50307	0	1	YAP1_3184	pool11	2.11796	3.59038	-0.344259	3.10776	2018.32	5292.01	Yes associated protein 1
SETX	-0.236647	0.152551	0	0	SETX_3476	pool12	2.11758	0.581816	0.628768	5.14215	430.566	830.725	senataxin
MEN1	-0.524474	0.450384	1	0	MEN1_1993	pool13	2.11718	0.310588	-0.0479192	6.08888	106.64	198.753	menin 1
MRE11A	-0.573326	0.120388	0	0	MRE11A_4841	pool12	2.11656	0.263793	6.82289	-0.737015	3391.97	4736.63	MRE11 homolog A, double strand break repair nuclease
FAM175A	-1.33913	-0.735418	1	0	FAM175A_430	pool12	2.11602	-2.89811	3.31663	5.92955	155.557	326.908	family with sequence similarity 175 member A
NKX3-1	-0.0438796	0.862963	1	0	NKX3-1_3170	pool13	2.11589	-0.192785	5.5518	0.988658	289.299	445.76	NK3 homeobox 1
NUDT16	-0.274252	0.526513	1	0	NUDT16_47	pool13	2.11323	0.693603	3.79313	1.85297	78.9052	401.299	nudix hydrolase 16
PPP4R2	-0.844664	-0.0468688	2	0	PPP4R2_865	pool13	2.11149	-1.17707	6.50666	1.00487	100.816	256.755	protein phosphatase 4 regulatory subunit 2
UNG	-0.000477987	4	0	3	UNG_285	pool11	2.10864	0.700236	1.23364	4.39204	111.631	263.726	uracil DNA glycosylase
BCL3	-0.227678	0.186152	0	0	BCL3_560	pool12	2.10719	-2.78998	2.60969	6.50185	125.906	198.554	B-cell CLL/lymphoma 3
NONO	-0.0937727	0.453828	0	2	NONO_1092	pool11	2.10696	3.77012	2.90615	-0.35539	301.691	538.455	non-POU domain containing, octamer-binding
TAOK3	-1.52288	-0.0626828	2	0	TAOK3_3060	pool13	2.10667	-0.451804	6.39323	0.378574	141.52	290.849	TAO kinase 3
XAB2	-0.0825995	0.730954	0	1	XAB2_180	pool12	2.10597	0.309491	-0.207252	6.21568	78.3066	133.354	XPA binding protein 2
ING2	-0.947306	-0.298087	1	0	ING2_525	pool12	2.10438	-0.467888	0.303152	6.47787	1029.53	1570.49	inhibitor of growth family member 2
DMAP1	-1.83863	0.248259	2	0	DMAP1_467	pool13	2.10214	0.0864885	3.38913	2.8308	381.488	751.856	DNA methyltransferase 1 associated protein 1
RPA4	-0.169027	0.285419	0	2	RPA4_1452	pool12	2.10105	0.458863	0.133587	5.7107	1361.68	2562.75	replication protein A4
NFRKB	-0.262171	0.196338	0	0	NFRKB_4337	pool12	2.09844	0.661259	0.342285	5.29179	86.9404	186.755	nuclear factor related to kappaB binding protein
ERCC3	-0.305307	0.341035	1	0	ERCC3_726	pool13	2.09705	1.42623	2.22584	2.63908	41.1872	153.108	excision repair cross-complementation group 3
RFWD3	-0.0903905	1.56067	0	2	RFWD3_1648	pool11	2.09621	7.69411	0.574698	-1.98017	517.204	411.057	ring finger and WD repeat domain 3
VAV3	-0.686977	-0.121708	2	0	VAV3_402	pool12	2.09484	-0.128581	-0.112492	6.52558	367.328	726.173	vav guanine nucleotide exchange factor 3
SLC30A9	-0.722391	0.3213	1	0	SLC30A9_2007	pool13	2.09462	-0.557907	0.96052	5.88125	147.878	322.366	solute carrier family 30 (zinc transporter), member 9
RAD51C	-0.308919	0.312114	0	0	RAD51C_238	pool13	2.09167	-0.27913	6.31209	0.242054	193.736	382.829	RAD51 paralog C
ACTL6A	-0.0386738	0.442493	0	0	ACTL6A_1297	pool11	2.08828	-0.834735	0.976133	6.12345	123.944	228.11	actin like 6A
DDIT3	-0.196406	0.221776	0	0	DDIT3_113	pool12	2.08665	-0.83059	1.1351	5.95546	554.955	661.993	DNA damage inducible transcript 3
POLR2G	-0.271809	0.149967	0	0	POLR2G_526	pool11	2.08393	1.15536	6.19485	-1.09843	5.25162	276.685	polymerase (RNA) II (DNA directed) polypeptide G
NSMCE2	-0.45892	-0.00528701	0	0	NSMCE2_638	pool12	2.08342	-2.01428	6.77651	1.48802	236.964	143.035	NSE2/MMS21 homolog, SMC5-SMC6 complex SUMO ligase
PSMD9	-0.111091	0.859492	1	0	PSMD9_2306	pool11	2.0821	1.87161	3.33015	1.04453	691.012	2505.48	proteasome 26S subunit, non-ATPase 9
SHPRH	-0.653843	-0.0328734	3	0	SHPRH_5151	pool13	2.08093	0.122498	0.647888	5.4724	413.661	860.285	SNF2 histone linker PHD RING helicase, E3 ubiquitin protein ligase
CIDEB	-0.615467	0.621784	0	0	CIDEB_1878	pool13	2.07943	0.925673	6.12682	-0.814202	43.7807	96.8982	cell death-inducing DFFA-like effector b
MACROD1	-0.0213631	0.798876	0	1	MACROD1_1226	pool12	2.07837	-0.207262	0.203316	6.23907	218.232	320.233	MACRO domain containing 1
SMC2	-0.00917295	2.50864	0	2	SMC2_2118	pool11	2.07432	6.93919	-0.716224	0	0.313793	52.7827	structural maintenance of chromosomes 2
TCEA1	-0.414991	-0.37059	0	0	TCEA1_366	pool12	2.07366	1.27424	-1.35837	6.30511	104.306	125.008	transcription elongation factor A1
TAOK1	-0.24306	0.203912	0	0	TAOK1_4803	pool12	2.07356	0.6702	0.934264	4.6162	187.423	646.107	TAO kinase 1
PSMD1	-0.171791	0.466609	0	1	PSMD1_1967	pool13	2.07171	0.216551	-0.33295	6.33152	0.570478	65.5394	proteasome 26S subunit, non-ATPase 1
MCM9	-0.261537	0.992679	1	1	MCM9_299	pool11	2.07009	7.28907	-1.03311	-0.0456881	19.7922	61.3271	minichromosome maintenance 9 homologous recombination repair factor
HMGB1	-0.262807	0.298173	1	1	HMGB1_2936	pool11	2.06891	4.11211	3.42393	-1.3293	83.7362	290.928	high mobility group box 1
FBXO6	-0.198734	0.519562	0	0	FBXO6_1024	pool13	2.06754	-1.69118	5.00055	2.89325	79.0688	63.5319	F-box protein 6
ZRANB3	-1.25964	0.973875	1	0	ZRANB3_2060	pool13	2.06653	0.120123	5.91937	0.16011	48.3033	119.344	zinc finger RANBP2-type containing 3
WRNIP1	-0.660747	0.0541377	2	1	WRNIP1_2342	pool12	2.06565	-0.158432	0.833378	5.52202	308.585	463.047	Werner helicase interacting protein 1
HMGA2	-0.267928	0.785686	1	0	HMGA2_1002	pool13	2.06432	0.445635	5.41257	0.334769	111.94	185.674	high mobility group AT-hook 2
TRIAP1	-0.0147532	1.92812	0	0	TRIAP1_472	pool11	2.06221	6.64158	-1.50279	1.04784	111.445	106.046	TP53 regulated inhibitor of apoptosis 1
PSMD5	-0.572352	-0.147093	1	1	PSMD5_336	pool12	2.06168	-0.724425	1.96948	4.93998	428.879	671.239	proteasome 26S subunit, non-ATPase 5
PLK3	-0.0462403	1.35067	0	2	PLK3_1157	pool11	2.06101	0.564372	4.72381	0.894862	257.725	476.943	polo like kinase 3
PGAP2	-0.20128	0.430626	0	0	PGAP2_1546	pool12	2.06045	0.633806	0.174131	5.37341	363.574	569.159	post-GPI attachment to proteins 2
TRIP13	-0.171276	0.552532	0	1	TRIP13_836	pool11	2.06031	7.29631	-0.423619	-0.691777	49.4894	88.7074	thyroid hormone receptor interactor 13
CIB1	-0.200246	0.175809	0	0	CIB1_944	pool11	2.05836	2.48148	5.27988	-1.58629	1203.31	1661.13	calcium and integrin binding 1
BRE	-0.400663	0.267124	1	0	BRE_637	pool13	2.05707	0.152975	0.896201	5.12202	256.237	546.954	brain and reproductive organ-expressed (TNFRSF1A modulator)
GTF2H5	-0.632085	0.00886256	0	0	GTF2H5_5660	pool13	2.05672	-0.153617	3.65287	2.6709	23.6952	47.5384	general transcription factor IIH subunit 5
FOXO4	-0.643401	0.0972902	2	0	FOXO4_708	pool13	2.05634	2.00971	-2.44694	6.60625	20.9296	168.783	forkhead box O4
FANCM	-0.166025	0.233215	0	2	FANCM_5176	pool12	2.05392	0.544812	-0.595614	6.21257	1730	2098.48	Fanconi anemia complementation group M
TDP1	-0.230106	0.117419	0	0	TDP1_1815	pool12	2.05384	0.113469	-0.0874504	6.13551	466.156	730.445	tyrosyl-DNA phosphodiesterase 1
NFATC2	-0.574466	-0.631341	0	0	NFATC2_2460	pool12	2.05297	-1.08215	4.54768	2.69338	559.795	1107.49	nuclear factor of activated T-cells, cytoplasmic, calcineurin-dependent 2
PSMF1	-0.090337	0.857611	0	0	PSMF1_2485	pool11	2.05132	0	0	6.15397	0.0773308	28.9092	proteasome inhibitor subunit 1
PSMB2	-1.057	-0.368252	0	0	PSMB2_4106	pool12	2.05123	0.262431	-0.782409	6.67365	406.296	544.212	proteasome subunit beta 2
RBM14	-0.485585	-0.032031	2	0	RBM14_3764	pool12	2.049	-0.344305	-0.178774	6.67009	1788.33	2390.32	RNA binding motif protein 14
SMC4	-0.090444	1.3279	0	1	SMC4_1199	pool11	2.0479	1.53687	1.69134	2.9155	444.337	1786.06	structural maintenance of chromosomes 4
BLM	-1.15989	-0.430275	1	0	BLM_1957	pool11	2.04652	-1.30362	1.05648	6.38671	1838.2	2368.37	Bloom syndrome RecQ like helicase
XAB2	-0.0825995	0.730954	0	1	XAB2_1461	pool12	2.04516	3.19631	2.93918	0	0	4.94529	XPA binding protein 2
C9orf102	-0.156456	0.944622	0	0	C9orf102_3924	pool13	2.04493	-0.902053	2.94154	4.09531	231.321	417.149
PGAP2	-0.20128	0.430626	0	0	PGAP2_1415	pool12	2.04278	-0.894841	1.11203	5.91116	173.534	337.216	post-GPI attachment to proteins 2
APLF	-0.479124	-0.0916759	2	0	APLF_325	pool12	2.04123	1.9012	-0.389974	4.61246	177.989	343.394	aprataxin and PNKP like factor
RAD51	-0.176265	0.674279	1	0	RAD51_1825	pool11	2.04011	0.498219	-1.29264	6.91475	34.1673	179.436	RAD51 recombinase
NEK1	-0.443456	0.316683	0	0	NEK1_1717	pool13	2.03845	0.213972	1.31669	4.58469	518.307	1102.45	NIMA related kinase 1
HUS1	-0.22439	0.0921589	0	1	HUS1_822	pool12	2.03807	-2.27259	1.64815	6.73864	55.7232	47.2431	HUS1 checkpoint clamp component
MBD4	-0.200935	0.882397	0	0	MBD4_445	pool11	2.03751	6.72875	3.38787	-4.00409	837.961	135.71	methyl-CpG binding domain 4 DNA glycosylase
POLL	-0.274578	0.249646	1	0	POLL_607	pool13	2.03196	-1.64772	4.30924	3.43436	261.695	237.511	polymerase (DNA directed), lambda
GEN1	-0.331614	0.0850754	0	0	GEN1_5265	pool12	2.03068	0.672973	-0.789407	6.20847	610.484	863.143	GEN1, Holliday junction 5' flap endonuclease
POLH	-0.272866	0.510604	1	1	POLH_4859	pool12	2.02965	2.00198	3.96875	0.118205	7.46881	64.9147	polymerase (DNA directed), eta
XRCC5	-0.380594	-0.0238794	1	0	XRCC5_967	pool12	2.02884	0.169743	-0.41874	6.3355	954.111	1475.45	X-ray repair complementing defective repair in Chinese hamster cells 5
C17orf70	-0.0884695	0.693575	0	1	C17orf70_518	pool12	2.02725	6.44657	-0.281788	-0.0830242	0.153796	28.7984
TP63	-0.438302	0.0762898	1	0	TP63_1008	pool13	2.02661	-1.05755	6.45677	0.680599	193.553	258.299	tumor protein p63
MAD2L2	-0.167491	0.375099	0	0	MAD2L2_883	pool12	2.02619	-0.875087	-0.129996	7.08364	317.075	477.481	MAD2 mitotic arrest deficient-like 2 (yeast)
PSMA7	-0.353302	0.113961	0	0	PSMA7_633	pool11	2.0249	0.669133	6.26128	-0.855701	1.77955	132.341	proteasome subunit alpha 7
IRF7	-0.0594835	1.18177	1	2	IRF7_1780	pool11	2.02319	-1.75684	1.56882	6.25758	264.268	224.473	interferon regulatory factor 7
CD74	-0.073709	0.544242	1	1	CD74_700	pool11	2.02055	-1.3284	6.52503	0.865016	241.874	468.112	CD74 molecule
SMARCA5	-0.115998	0.584693	0	1	SMARCA5_3455	pool11	2.01873	-4.96522	5.51566	5.50575	9173.93	982.535	SWI/SNF related, matrix associated, actin dependent regulator of chromatin, subfamily a, member 5
EGLN3	-0.245422	0.132356	0	1	EGLN3_1318	pool12	2.01541	-0.162614	-0.172854	6.3817	1157.14	1409.73	egl-9 family hypoxia-inducible factor 3
CRY1	-0.189431	1.50864	1	1	CRY1_1624	pool11	2.01155	-0.947666	0.121809	6.86051	978.426	1269.47	cryptochrome circadian clock 1
YY1	-0.309804	0.379968	0	0	YY1_1390	pool13	2.00987	1.16833	6.26732	-1.40606	207.508	341.707	YY1 transcription factor
XIAP	-0.0956632	0.61261	0	0	XIAP_2155	pool13	2.00894	0.926728	4.76994	0.330137	440.667	942.94	X-linked inhibitor of apoptosis
RECQL5	-0.610302	-0.548982	2	0	RECQL5_1307	pool12	2.00706	1.45511	6.81146	-2.24538	652.814	689.261	RecQ like helicase 5
IRF3	-0.242225	0.31894	0	0	IRF3_88	pool12	2.00646	0.541043	-0.404003	5.88233	749.271	1143.76	interferon regulatory factor 3
FLJ35220	-0.294307	0.876802	0	0	FLJ35220_398	pool13	2.00604	6.01813	0	0	0	21.2697
CDK9	-0.322758	0.120159	0	1	CDK9_1880	pool12	2.00603	-0.0900218	-0.0247768	6.1329	1502.15	1907.1	cyclin-dependent kinase 9
MAD2L2	-0.167491	0.375099	0	0	MAD2L2_611	pool12	2.00285	-2.29627	4.39179	3.91303	283.609	124.515	MAD2 mitotic arrest deficient-like 2 (yeast)
PARP9	-0.349401	0.215739	0	1	PARP9_1116	pool12	2.00026	-0.810499	0.744874	6.0664	239.028	278.722	poly(ADP-ribose) polymerase family member 9
FANCI	-0.272215	0.548674	1	0	FANCI_3760	pool11	1.9992	6.45851	-0.716224	0.255305	0.214292	29.0458	Fanconi anemia complementation group I
POLI	-0.25321	0.714218	0	0	POLI_1675	pool11	1.99735	3.36391	-0.0087127	2.63686	425.836	1097.11	polymerase (DNA directed) iota
TDG	-0.186753	0.686766	0	0	TDG_3107	pool11	1.99673	8.08851	-2.06108	-0.0372466	3904.36	2255.68	thymine DNA glycosylase
BLM	-1.15989	-0.430275	1	0	BLM_1332	pool11	1.99349	-0.897624	-0.204255	7.08235	840.006	897.816	Bloom syndrome RecQ like helicase
MICA	-0.560509	0.296107	1	0	MICA_1205	pool11	1.99307	2.89623	4.85343	-1.77045	419.327	565.269	MHC class I polypeptide-related sequence A
NDNL2	-0.234331	0.269379	0	1	NDNL2_883	pool12	1.99262	-0.889322	0.246779	6.6204	699.334	755.169
ASTE1	-0.0715529	0.743282	0	1	ASTE1_2426	pool11	1.98922	3.21776	4.914	-2.16411	761.355	961.624	asteroid homolog 1 (Drosophila)
CHAF1B	-0.174964	1.32883	1	1	CHAF1B_605	pool13	1.98871	2.18094	3.96956	-0.184366	184.505	447.079	chromatin assembly factor 1 subunit B
ATR	-1.18243	-0.0182267	2	0	ATR_814	pool13	1.98617	2.53219	4.51564	-1.0893	931.419	947.909	ATR serine/threonine kinase
STRA13	-0.34515	0.0381994	0	1	STRA13_107	pool12	1.98579	-0.529013	-0.20804	6.69443	438.123	651.965	stimulated by retinoic acid 13
EPC2	-0.208731	0.36947	1	0	EPC2_801	pool13	1.98512	-0.289961	6.4845	-0.239186	156.633	357.72	enhancer of polycomb homolog 2
C12orf48	-0.274987	0.0204516	1	0	C12orf48_1399	pool12	1.98434	-0.0040947	-0.0672711	6.0244	1538.5	1912.14
TWIST1	-0.75721	-0.0106392	0	0	TWIST1_770	pool12	1.98418	0.744072	-2.07714	7.28562	196.772	235.214	twist family bHLH transcription factor 1
REV1	-0.29056	0.412738	1	1	REV1_3025	pool12	1.98298	0.691741	-0.438872	5.69607	162.872	237.123	REV1, DNA directed polymerase
CRADD	-0.473015	0.349984	0	0	CRADD_1060	pool13	1.98208	-0.442954	-0.0813938	6.47059	29.9401	60.796	CASP2 and RIPK1 domain containing adaptor with death domain
ALKBH1	-0.227238	0.469928	0	0	ALKBH1_949	pool13	1.97899	-1.29304	0.3197	6.91031	227.357	244.892	alkB homolog 1, histone H2A dioxygenase
PML	-0.159329	0.491066	0	0	PML_886	pool12	1.97868	5.98392	-0.281788	0.233918	0.0719002	20.8222	promyelocytic leukemia
BBC3	-0.615109	0.232621	0	0	BBC3_1009	pool13	1.97681	0.382665	1.57226	3.97552	166.557	461.151	BCL2 binding component 3
DNAJA1	-1.4168	0.596708	2	0	DNAJA1_306	pool13	1.97637	-0.419599	2.15815	4.19056	352.393	832.669	DnaJ heat shock protein family (Hsp40) member A1
MCRS1	0	1.04624	0	1	MCRS1_345	pool12	1.97334	-0.309121	0.331945	5.8972	532.627	740.684	microspherule protein 1
ATAD5	-0.105795	0.420674	0	2	ATAD5_3352	pool12	1.97276	0.645808	5.80868	-0.536204	1831.79	2088.12	ATPase family, AAA domain containing 5
RFC2	-0.00930604	1.91009	0	1	RFC2_821	pool11	1.9722	5.9166	0	0	0	19.8017	replication factor C subunit 2
PLK5	-1.13727	0.280669	1	0	PLK5_517	pool13	1.96993	2.42112	-0.0572235	3.54588	1.67007	14.0732	polo like kinase 5
XRCC5	-0.380594	-0.0238794	1	0	XRCC5_1696	pool12	1.96903	2.42327	-2.30428	5.78811	112.771	106.867	X-ray repair complementing defective repair in Chinese hamster cells 5
PSMB9	-0.193616	0.193345	0	0	PSMB9_920	pool11	1.96891	-0.559261	5.6871	0.778908	185.925	407.784	proteasome subunit beta 9
PARP4	-0.184688	0.526075	0	1	PARP4_4709	pool11	1.96866	0.33345	-0.778	6.35053	476.712	577.982	poly(ADP-ribose) polymerase family member 4
TREX1	-0.682354	-0.259322	3	1	TREX1_1464	pool12	1.96839	-0.298003	-0.438636	6.6418	281.593	323.201	three prime repair exonuclease 1
SIRT6	-0.166853	-0.0574959	0	0	SIRT6_487	pool12	1.96602	0.119858	0.330864	5.44734	16.7094	39.476	sirtuin 6
PSMC1	-0.0144837	1.00261	0	0	PSMC1_95	pool13	1.96461	3.02835	1.85143	1.01406	65.5848	206.663	proteasome 26S subunit, ATPase 1
APTX	-0.205582	0.318307	0	0	APTX_1502	pool12	1.96393	-2.47849	1.70474	6.66555	191.703	271.945	aprataxin
NACC2	-2.18046	0.00983881	1	0	NACC2_1970	pool13	1.9639	-1.55643	1.61403	5.8341	248.623	511.493	NACC family member 2
RAD18	-1.36552	-0.230844	0	0	RAD18_523	pool12	1.96323	-0.0444989	-0.629073	6.56325	990.043	1322.13	RAD18, E3 ubiquitin protein ligase
PHLDA3	-0.0874591	0.355758	0	2	PHLDA3_1210	pool12	1.96299	0.136113	3.37671	2.37615	175.98	563.389	pleckstrin homology like domain family A member 3
MDC1	-0.00833099	0.785686	0	2	MDC1_5819	pool12	1.96102	0.354479	2.38977	3.1388	122.508	324.969	mediator of DNA damage checkpoint 1
MSH5	-0.236572	0.477947	0	0	MSH5_2137	pool13	1.95984	0.550735	-0.292583	5.62137	343.713	545.752	mutS homolog 5
MNDA	-0.127494	0.888401	0	1	MNDA_457	pool11	1.95937	1.60547	5.97706	-1.70443	220.473	643.293	myeloid cell nuclear differentiation antigen
TAF9B	-0.633764	0.134955	0	0	TAF9B_453	pool13	1.95848	0.239362	6.54821	-0.91212	1007.72	1393.25	TATA-box binding protein associated factor 9b
SMARCB1	-1.25964	-0.732594	1	0	SMARCB1_490	pool12	1.95214	-0.460574	1.84125	4.47573	55.4989	118.202	SWI/SNF related, matrix associated, actin dependent regulator of chromatin, subfamily b, member 1
MMS22L	-0.475734	-0.0468204	1	0	MMS22L_2607	pool13	1.95021	-0.0961699	5.3554	0.591397	428.955	645.748	MMS22 like, DNA repair protein
SMARCA5	-0.115998	0.584693	0	1	SMARCA5_2294	pool11	1.95014	1.30733	5.04187	-0.498768	484.753	629.431	SWI/SNF related, matrix associated, actin dependent regulator of chromatin, subfamily a, member 5
SMARCAD1	-0.527682	-0.237321	1	0	SMARCAD1_807	pool12	1.94868	1.44689	-1.85623	6.25539	1177.59	1009.01	SWI/SNF-related, matrix-associated actin-dependent regulator of chromatin, subfamily a, containing DEAD/H box 1
PSMD11	-1.3098	0.0585383	1	0	PSMD11_794	pool13	1.94821	-2.55165	4.48303	3.91324	112.964	35.1235	proteasome 26S subunit, non-ATPase 11
C19orf40	-0.345342	0.142909	1	0	C19orf40_814	pool12	1.94618	-1.2614	1.58432	5.51562	313.23	255.747
UIMC1	-0.155336	0.292345	1	2	UIMC1_2244	pool11	1.94329	-0.746003	6.27532	0.300563	770.647	1520.95	ubiquitin interaction motif containing 1
SHFM1	-0.267606	0.369776	1	1	SHFM1_122	pool11	1.94313	2.80345	5.51024	-2.4843	27.9507	36.8438	split hand/foot malformation (ectrodactyly) type 1
OBFC2A	-0.480566	-0.0213631	0	1	OBFC2A_2121	pool12	1.94099	-0.993738	0.266722	6.54997	548.096	722.196
EEPD1	-0.188224	0.299729	0	1	EEPD1_2340	pool12	1.93842	0.495803	3.12481	2.19466	3.56148	12.5645	endonuclease/exonuclease/phosphatase family domain containing 1
RPA2	-0.294307	0.127902	1	1	RPA2_1687	pool12	1.93842	-0.538657	0.235669	6.11824	1141.26	1458.73	replication protein A2
TERF2IP	-0.0870344	0.826814	0	0	TERF2IP_1039	pool13	1.93778	0.754166	2.2899	2.76928	362.338	1032.37	telomeric repeat binding factor 2, interacting protein
LIG1	-0.145937	0.2522	1	1	LIG1_1385	pool11	1.93636	0.758735	5.54038	-0.490037	2651.32	3296.12	ligase I, DNA, ATP-dependent
PSMD6	-0.022185	1.27654	0	1	PSMD6_1045	pool13	1.93502	3.19252	0	2.61254	0.155802	5.59955	proteasome 26S subunit, non-ATPase 6
CLOCK	-0.344765	1.22475	0	0	CLOCK_1337	pool13	1.93454	1.02056	4.53709	0.245966	369.836	651.485	clock circadian regulator
CIDEB	-0.615467	0.621784	0	0	CIDEB_1049	pool13	1.93392	0.105017	5.76799	-0.0712505	250.675	383.379	cell death-inducing DFFA-like effector b
TDP2	-0.660549	1.37882	0	0	TDP2_780	pool13	1.9311	-1.29243	3.28852	3.79722	79.4906	66.7717	tyrosyl-DNA phosphodiesterase 2
YAP1	-0.168834	1.50307	0	1	YAP1_4244	pool11	1.93016	4.03742	1.14124	0.611803	702.245	1878.14	Yes associated protein 1
REV1	-0.29056	0.412738	1	1	REV1_2785	pool12	1.92957	0.166045	-0.476298	6.09897	1006.25	1191.4	REV1, DNA directed polymerase
TP73	-0.288952	0.672233	0	0	TP73_575	pool13	1.92738	0.745969	0.647009	4.38915	202.073	424.248	tumor protein p73
DEK	-0.159831	0.708409	0	0	DEK_1060	pool11	1.92654	-0.453537	4.76632	1.46684	528.999	634.427	DEK proto-oncogene
CHAF1B	-0.174964	1.32883	1	1	CHAF1B_1772	pool13	1.92504	0.893091	5.4677	-0.58567	85.4293	280.543	chromatin assembly factor 1 subunit B
MMS22L	-0.475734	-0.0468204	1	0	MMS22L_1447	pool13	1.92475	6.62646	1.4358	-2.28802	214.494	209.235	MMS22 like, DNA repair protein
RPAIN	-0.525347	-0.183361	1	1	RPAIN_441	pool12	1.92064	-0.924314	1.12061	5.56562	160.428	154.269	RPA interacting protein
KIF22	-0.106571	1.62525	1	3	KIF22_326	pool11	1.91884	5.9537	-0.197174	0	0.107146	20.3771	kinesin family member 22
FZR1	-0.561616	0.125518	2	0	FZR1_2738	pool13	1.91761	-0.536913	-0.327559	6.6173	0.968612	95.8118	fizzy/cell division cycle 20 related 1
ATRIP	-0.188961	0.414878	0	1	ATRIP_932	pool12	1.91711	1.67833	6.21751	-2.14452	66.0869	92.7683	ATR interacting protein
HIPK2	-0.484656	0.19552	1	0	HIPK2_11626	pool13	1.91676	-0.509218	3.66843	2.59108	128.701	200.823	homeodomain interacting protein kinase 2
BRCA2	-0.227458	0.012736	1	0	BRCA2_9024	pool11	1.91592	1.37525	5.37953	-1.00704	925.8	1119.2	breast cancer 2
BCL3	-0.227678	0.186152	0	0	BCL3_1796	pool12	1.9156	0.193752	0.160926	5.39211	351.859	487.712	B-cell CLL/lymphoma 3
EYA1	-0.218604	0.938548	0	1	EYA1_1884	pool13	1.91392	1.65059	3.03578	1.05538	103.409	334.891	EYA transcriptional coactivator and phosphatase 1
TERF2IP	-0.0870344	0.826814	0	0	TERF2IP_2078	pool13	1.91284	0.666903	1.46739	3.60424	470.565	1344.29	telomeric repeat binding factor 2, interacting protein
POLI	-0.25321	0.714218	0	0	POLI_5287	pool11	1.91141	4.01887	-0.0301235	1.74547	1682.44	5399.68	polymerase (DNA directed) iota
C9orf80	-1.41117	0.0430636	0	0	C9orf80_452	pool13	1.911	-0.996553	6.88029	-0.150742	855.355	1114.32
USP16	-0.408713	-0.0320778	1	1	USP16_1386	pool12	1.90839	0.769261	-1.21579	6.17169	652.379	890.895	ubiquitin specific peptidase 16
RBBP8	-0.260744	0.434034	0	1	RBBP8_1549	pool11	1.90778	0.366767	4.97516	0.381402	77.3309	117.043	retinoblastoma binding protein 8
ZRANB3	-1.25964	0.973875	1	0	ZRANB3_3290	pool13	1.90544	-0.109923	0.347783	5.47846	162.293	232.949	zinc finger RANBP2-type containing 3
MRE11A	-0.573326	0.120388	0	0	MRE11A_1478	pool12	1.90516	0.594222	-0.438642	5.55991	64.4832	120.023	MRE11 homolog A, double strand break repair nuclease
RAD17	-0.581367	-0.396964	2	1	RAD17_541	pool12	1.90393	0.28805	6.51351	-1.08978	965.693	1021.17	RAD17 checkpoint clamp loader component
MAPKAPK2	-0.328457	-0.0345631	0	0	MAPKAPK2_3027	pool12	1.89817	-0.153459	-0.722421	6.57039	1161.05	1428.13	mitogen-activated protein kinase-activated protein kinase 2
MAEL	-0.09442	0.982967	0	1	MAEL_1100	pool13	1.89795	-1.83303	2.31439	5.21248	41.8776	31.2068	maelstrom spermatogenic transposon silencer
KIAA0415	-0.328179	-0.615647	1	0	KIAA0415_2524	pool12	1.89594	2.03644	-0.108214	3.7596	888.73	1859.25
FEN1	-0.171405	0.263683	0	1	FEN1_1572	pool12	1.89502	-0.0764348	-0.63234	6.39383	1981.95	2304.16	flap structure-specific endonuclease 1
USP28	-0.12436	0.424581	1	2	USP28_2177	pool12	1.89109	-0.196313	-0.632825	6.5024	1769.71	2228.86	ubiquitin specific peptidase 28
RPA3	-0.401976	-0.507799	2	0	RPA3_487	pool11	1.88961	2.39519	2.43583	0.837805	32.607	156.782	replication protein A3
PSEN1	-0.356844	0.288868	1	0	PSEN1_2751	pool13	1.88932	-0.374665	-0.729725	6.77235	154.887	242.32	presenilin 1
GTF2H2	-0.774432	0.0581905	0	0	GTF2H2_1403	pool12	1.88808	0.0498678	0.0391486	5.57522	859.202	1222.58	general transcription factor IIH subunit 2
FLJ35220	-0.294307	0.876802	0	0	FLJ35220_64	pool13	1.88705	-1.45047	6.6168	0.49483	288.693	418.515
EYA2	-0.15484	0.779369	0	1	EYA2_1997	pool11	1.88004	-1.57593	-0.231236	7.44729	304.212	402.351	EYA transcriptional coactivator and phosphatase 2
MLH1	-0.303032	0.0592346	1	0	MLH1_2216	pool11	1.87808	2.77738	2.72458	0.132276	502.649	1266.45	mutL homolog 1
RTEL1	-0.204746	0.26496	0	0	RTEL1_823	pool12	1.87585	-0.761208	2.1435	4.24526	29.665	91.0876	regulator of telomere elongation helicase 1
RAD51C	-0.308919	0.312114	0	0	RAD51C_349	pool13	1.87567	-0.673457	5.5188	0.781665	62.749	112.607	RAD51 paralog C
TIPRL	-3	0.904831	2	0	TIPRL_237	pool13	1.87432	-0.783252	1.36984	5.03636	138.746	206.716	TOR signaling pathway regulator
BABAM1	-0.704653	-0.0183626	2	0	BABAM1_430	pool13	1.87267	3.20824	-4.10324	6.513	63.3286	155.853	BRISC and BRCA1 A complex member 1
INO80D	-1.53611	0.11081	1	0	INO80D_13168	pool13	1.87136	0.492622	5.7307	-0.609229	134.652	230.677	INO80 complex subunit D
NFATC2	-0.574466	-0.631341	0	0	NFATC2_1691	pool12	1.86635	1.59776	0.138647	3.86264	217.032	322.199	nuclear factor of activated T-cells, cytoplasmic, calcineurin-dependent 2
PSMB11	-1.16178	-0.146728	1	0	PSMB11_1343	pool13	1.86514	1.47413	3.71108	0.410219	52.1977	122.981	proteasome (prosome, macropain) subunit, beta type, 11
RFWD2	-0.237772	0.100672	0	0	RFWD2_1517	pool12	1.86335	0.0357803	-0.0529705	5.60724	1269.64	1554.64	ring finger and WD repeat domain 2, E3 ubiquitin protein ligase
AEN	-0.165706	0.515985	0	1	AEN_2648	pool11	1.86212	7.35285	6.11347	-7.87997	399.217	213.217	apoptosis enhancing nuclease
LIG3	0	0.957818	0	2	LIG3_752	pool12	1.86132	-2.17555	0.840917	6.9186	150.516	336.204	ligase III, DNA, ATP-dependent
XRCC1	-0.0085967	1.0752	0	1	XRCC1_1505	pool12	1.86106	2.53171	-1.77919	4.83065	160.579	136.368	X-ray repair complementing defective repair in Chinese hamster cells 1
TMEM161A	-0.167683	0.509199	0	1	TMEM161A_133	pool11	1.85922	2.12412	5.17557	-1.72204	506.576	446.851	transmembrane protein 161A
CDKN1B	-0.201211	0.272052	0	2	CDKN1B_2027	pool12	1.8584	0.916596	-0.600958	5.25956	524.571	893.135	cyclin-dependent kinase inhibitor 1B (p27, Kip1)
RAD51AP1	-0.314348	0.508919	1	0	RAD51AP1_999	pool11	1.85814	-2.88705	4.27814	4.18333	434.485	82.743	RAD51 associated protein 1
NSMCE1	-0.209363	0.270997	0	1	NSMCE1_490	pool12	1.85515	0.974109	-1.46149	6.05285	639.89	621.231	NSE1 homolog, SMC5-SMC6 complex component
PSMB10	-0.195247	0.272866	0	0	PSMB10_961	pool12	1.85514	-0.459244	0.562121	5.46255	994.561	1409.69	proteasome subunit beta 10
HUS1B	-1.40012	-0.0351749	1	0	HUS1B_802	pool13	1.85414	1.19552	0.779479	3.58743	273.731	794.833	HUS1 checkpoint clamp component B
PSMB3	-0.253366	0.500038	0	1	PSMB3_79	pool11	1.85264	1.4428	5.62347	-1.50836	397.162	353.919	proteasome subunit beta 3
NSMCE1	-0.209363	0.270997	0	1	NSMCE1_549	pool12	1.85262	0.368179	-1.06034	6.25002	1215.29	1329.56	NSE1 homolog, SMC5-SMC6 complex component
BCL6	-0.0973445	0.928486	1	2	BCL6_2410	pool11	1.85149	1.12006	6.07006	-1.63566	487.141	903.049	B-cell CLL/lymphoma 6
BAX	-0.0896424	1.19246	0	1	BAX_220	pool11	1.85017	3.38493	0.37711	1.78846	485.949	1901.46	BCL2-associated X protein
FAN1	-1.73049	0.79915	0	0	FAN1_468	pool13	1.84519	-0.986956	6.28927	0.233267	324.321	411.572	FANCD2/FANCI-associated nuclease 1
PMS2	-1.17263	-0.143513	1	0	PMS2_1751	pool13	1.84171	-0.828186	6.60936	-0.256054	441.687	670.821	PMS1 homolog 2, mismatch repair system component
EPC2	-0.208731	0.36947	1	0	EPC2_1790	pool13	1.84162	0.0788111	4.28222	1.16383	242.929	511.152	enhancer of polycomb homolog 2
TAOK1	-0.24306	0.203912	0	0	TAOK1_11517	pool12	1.84114	0.914245	-1.28506	5.89425	957.128	956.353	TAO kinase 1
NFRKB	-0.262171	0.196338	0	0	NFRKB_1419	pool12	1.84019	-0.194748	-0.589697	6.30503	927.175	1018.1	nuclear factor related to kappaB binding protein
SOD1	-0.696156	0.00432094	1	0	SOD1_810	pool13	1.84011	-0.265898	5.76668	0.0195558	525.047	679.225	superoxide dismutase 1, soluble
TRIP13	-0.171276	0.552532	0	1	TRIP13_993	pool11	1.83658	7.83914	-1.28506	-1.04435	1265.19	820.701	thyroid hormone receptor interactor 13
BAX	-0.0896424	1.19246	0	1	BAX_209	pool11	1.83451	3.94106	1.56248	0	1.07146	8.60237	BCL2-associated X protein
ABL1	-0.000782434	0.954677	0	1	ABL1_158	pool11	1.83428	3.03892	1.28351	1.1804	583.361	1730.89	ABL proto-oncogene 1, non-receptor tyrosine kinase
GNL1	-0.655019	0.130475	1	0	GNL1_4818	pool13	1.83371	2.20336	-1.18853	4.48631	135.135	386.809	guanine nucleotide binding protein-like 1
USP16	-0.408713	-0.0320778	1	1	USP16_363	pool12	1.83363	-0.348297	-0.183342	6.03254	1160.29	1325.71	ubiquitin specific peptidase 16
TRIM28	-0.0146184	0.443818	0	1	TRIM28_2596	pool11	1.83114	1.38098	4.23068	-0.118236	481.241	958.97	tripartite motif containing 28
KIAA0415	-0.328179	-0.615647	1	0	KIAA0415_5221	pool12	1.82981	0.247496	-1.157	6.39895	1808.8	1723.77
CDCA5	-0.0721679	0.347077	0	0	CDCA5_565	pool12	1.82409	1.39784	-1.66567	5.74008	1049.94	749.132	cell division cycle associated 5
PSMB1	-0.278519	0.319664	1	0	PSMB1_751	pool11	1.82382	-0.117781	5.1171	0.472152	0.313793	18.8669	proteasome subunit beta 1
INO80C	-0.319211	0.469032	0	0	INO80C_492	pool13	1.82349	0.358705	4.59649	0.515271	515.087	1102.63	INO80 complex subunit C
USP7	-0.349207	0.440093	0	0	USP7_4946	pool13	1.82105	0.29702	4.04466	1.12146	327.089	917.697	ubiquitin specific peptidase 7 (herpes virus-associated)
FOXN3	-0.484789	0.0654006	2	1	FOXN3_1474	pool12	1.81948	1.82649	5.19325	-1.56129	346.112	352.836	forkhead box N3
MSH5	-0.236572	0.477947	0	0	MSH5_2076	pool13	1.81897	0.831602	0.898998	3.72632	38.2428	89.8332	mutS homolog 5
TDP1	-0.230106	0.117419	0	0	TDP1_1424	pool12	1.8176	-1.05349	0.590317	5.91597	565.53	598.03	tyrosyl-DNA phosphodiesterase 1
NFRKB	-0.262171	0.196338	0	0	NFRKB_980	pool12	1.81744	-0.0996461	1.11107	4.44089	636.745	1197.59	nuclear factor related to kappaB binding protein
POLR2J	-0.0238335	0.955068	0	1	POLR2J_916	pool11	1.81505	2.71632	3.74643	-1.01761	414.535	875.337	polymerase (RNA) II (DNA directed) polypeptide J, 13.3kDa
MSH4	-0.949234	1.7167	0	0	MSH4_2162	pool13	1.81499	1.98716	1.03108	2.42672	320.231	844.384	mutS homolog 4
FLJ35220	-0.294307	0.876802	0	0	FLJ35220_407	pool13	1.81198	-0.405192	3.55135	2.28979	126.118	335.534
NEK6	-0.627456	-0.153787	0	0	NEK6_1891	pool12	1.81079	-0.687491	1.62868	4.49118	452.537	533.982	NIMA related kinase 6
SOX4	-0.157079	0.721018	0	1	SOX4_2300	pool11	1.80846	4.51855	6.05227	-5.14544	29.4729	154.982	SRY-box 4
SOD1	-0.696156	0.00432094	1	0	SOD1_698	pool13	1.80734	0.643847	6.49079	-1.71262	542.818	803.173	superoxide dismutase 1, soluble
ERCC8	-0.370896	-0.398049	1	0	ERCC8_618	pool11	1.80615	7.31426	-1.89579	0	1.28575	52.8189	excision repair cross-complementation group 8
MRPS9	-0.31078	0.46382	1	0	MRPS9_556	pool13	1.80523	0.740401	-0.646127	5.32143	562.341	969.953	mitochondrial ribosomal protein S9
MDM4	-0.337148	0.0761345	0	0	MDM4_3243	pool12	1.80455	-0.824072	-0.084675	6.32239	381.305	395.595	MDM4, p53 regulator
EGLN3	-0.245422	0.132356	0	1	EGLN3_2036	pool12	1.80373	-0.952263	0.125534	6.23793	419.355	418.894	egl-9 family hypoxia-inducible factor 3
SMC1A	-0.175159	0.305834	0	3	SMC1A_8008	pool12	1.80342	0.310456	-1.11548	6.21528	2514.16	2744.12	structural maintenance of chromosomes 1A
UPF1	-0.352421	-0.0854453	1	0	UPF1_2277	pool12	1.80045	0.123849	0.341177	4.93634	20.8528	35.1319	UPF1 regulator of nonsense transcripts homolog (yeast)
AP5S1	-0.152242	0.390086	0	0	AP5S1_1454	pool12	1.79799	-1.89764	4.07586	3.21575	250.285	81.9691	adaptor related protein complex 5 sigma 1 subunit
PARP3	-0.0959339	0.856673	0	1	PARP3_937	pool11	1.79357	4.21775	2.22596	-1.063	75.1383	153.717	poly(ADP-ribose) polymerase family member 3
XRCC1	-0.0085967	1.0752	0	1	XRCC1_2016	pool12	1.78452	1.394	-2.00478	5.96435	821.098	622.685	X-ray repair complementing defective repair in Chinese hamster cells 1
PMS1	-0.333201	0.0336236	0	0	PMS1_1091	pool12	1.78366	-0.026975	-0.0732134	5.45116	1034.21	1363.73	PMS1 homolog 1, mismatch repair system component
TNP1	-0.229811	0.634138	0	0	TNP1_271	pool13	1.77995	1.59026	-0.50244	4.25204	51.0396	176.033	transition protein 1
HINFP	-0.363713	0.0902301	1	0	HINFP_1171	pool13	1.77948	-3.33012	3.95598	4.71257	57.9534	63.2315	histone H4 transcription factor
UCHL5	-2.55284	0.66354	1	0	UCHL5_461	pool13	1.77599	0.792864	5.44713	-0.91202	255.545	296.923	ubiquitin C-terminal hydrolase L5
C10orf90	-0.571217	0.804931	1	0	C10orf90_2135	pool13	1.77515	1.11482	3.36371	0.846917	302.975	968.708	chromosome 10 open reading frame 90
RAD21	-0.185886	1.0575	0	0	RAD21_3497	pool13	1.77153	2.14972	-1.76875	4.93362	744.454	610.616	RAD21 cohesin complex component
RAD54L	0	1.67572	0	4	RAD54L_1753	pool11	1.77114	2.04016	0.672122	2.60112	120.52	362.291	RAD54-like (S. cerevisiae)
POLE2	-0.0252581	1.27165	0	3	POLE2_935	pool11	1.7653	-0.566085	5.31287	0.549126	10.8735	39.1416	polymerase (DNA directed), epsilon 2, accessory subunit
SETX	-0.236647	0.152551	0	0	SETX_3936	pool12	1.76323	-0.546503	-0.397952	6.23414	538.969	688.251	senataxin
PRMT6	-0.466101	-0.0156527	0	0	PRMT6_2301	pool12	1.76202	-0.136142	-0.962821	6.38501	771.327	755.479	protein arginine methyltransferase 6
CSNK1D	-0.0332015	0.441772	0	2	CSNK1D_1936	pool11	1.76146	3.58877	-3.15357	4.84916	2372.35	470.791	casein kinase 1 delta
ING4	-0.234182	0.0609802	1	0	ING4_1147	pool12	1.76038	0.231127	-1.22968	6.27969	1762.13	1993.5	inhibitor of growth family member 4
CDKN1B	-0.201211	0.272052	0	2	CDKN1B_1898	pool12	1.75934	0.227163	-1.3501	6.40094	586.556	591.891	cyclin-dependent kinase inhibitor 1B (p27, Kip1)
POLL	-0.274578	0.249646	1	0	POLL_420	pool13	1.75861	0.286363	5.17793	-0.188467	61.6994	84.2026	polymerase (DNA directed), lambda
SFRP2	-0.381847	0.182104	1	0	SFRP2_1705	pool13	1.75152	0.63893	2.08261	2.53303	284.975	862.023	secreted frizzled-related protein 2
ATXN3	-0.500313	1.48545	1	1	ATXN3_2749	pool13	1.75014	0.730937	-1.53548	6.05497	9.08329	30.99	ataxin 3
DCLRE1C	-0.257432	0.440093	0	0	DCLRE1C_1776	pool11	1.74994	7.06535	5.32443	-7.13995	187.337	270.905	DNA cross-link repair 1C
POLR2H	-0.022185	1.25806	0	4	POLR2H_505	pool11	1.7498	1.47318	5.19268	-1.41646	366.982	598.151	polymerase (RNA) II (DNA directed) polypeptide H
CCNA2	-0.0256726	1.72816	0	4	CCNA2_1511	pool11	1.74765	8.65628	-3.11874	-0.294595	56.1921	140.374	cyclin A2
XPA	-0.63339	0.120904	0	0	XPA_826	pool13	1.74704	-0.751683	1.43506	4.55775	73.9786	137.355	xeroderma pigmentosum, complementation group A
PMS1	-0.333201	0.0336236	0	0	PMS1_591	pool12	1.74688	0.765046	-1.14547	5.62106	77.2561	107.787	PMS1 homolog 1, mismatch repair system component
PSMD14	-1.8041	-0.34592	1	0	PSMD14_1237	pool12	1.74461	-0.351963	5.80774	-0.221953	172.519	266.881	proteasome 26S subunit, non-ATPase 14
SMC5	-0.0109063	0.585528	0	1	SMC5_2846	pool11	1.74459	2.72037	1.6617	0.8517	244.626	858.025	structural maintenance of chromosomes 5
KIN	-0.518701	-0.165516	0	0	KIN_527	pool12	1.74058	2.39552	3.40285	-0.576644	7.11184	41.9357	Kin17 DNA and RNA binding protein
HIC1	-1.8962	-1.32422	2	0	HIC1_2668	pool13	1.74002	0.99889	6.07659	-1.85542	240.24	317.395	hypermethylated in cancer 1
INO80E	-0.174639	0.219827	0	0	INO80E_244	pool12	1.73822	-0.313871	-1.03222	6.56075	689.363	1023.63	INO80 complex subunit E
TLK2	-0.43368	0.185752	0	0	TLK2_1176	pool13	1.73487	-0.565338	6.44595	-0.675995	305.459	358.255	tousled like kinase 2
H2AFX	-0.00983881	0.838932	0	2	H2AFX_1555	pool12	1.73463	-0.582485	0.233967	5.55241	876.191	913.457	H2A histone family member X
NFATC2	-0.574466	-0.631341	0	0	NFATC2_2515	pool12	1.73306	0.0363433	-0.594852	5.75768	1622.99	1764.1	nuclear factor of activated T-cells, cytoplasmic, calcineurin-dependent 2
PSMD8	-0.232028	0.291239	0	0	PSMD8_44	pool12	1.73253	-0.367416	0.0554704	5.50955	503.312	680.862	proteasome 26S subunit, non-ATPase 8
TP73	-0.288952	0.672233	0	0	TP73_1978	pool13	1.73226	-0.724691	6.77496	-0.853484	463.32	446.679	tumor protein p73
MDM4	-0.337148	0.0761345	0	0	MDM4_2689	pool12	1.73172	0.753004	-1.47875	5.92091	561.203	716.102	MDM4, p53 regulator
PSMD13	-0.1673	2.27572	0	0	PSMD13_1429	pool11	1.73131	5.19392	0	0	0	11.8679	proteasome 26S subunit, non-ATPase 13
CHD1L	-0.133417	0.659953	0	1	CHD1L_977	pool11	1.72992	3.09552	-1.14186	3.23609	464.125	855.288	chromodomain helicase DNA binding protein 1-like
NEK11	-0.466355	0.113961	0	0	NEK11_717	pool12	1.72884	-0.0812137	-0.84926	6.11701	440.037	417.911	NIMA related kinase 11
ERCC5	-0.224026	0.17744	0	2	ERCC5_2911	pool12	1.72674	-0.261064	-0.804741	6.24603	955.204	1143.95	excision repair cross-complementation group 5
NIPBL	-0.439735	0.792366	2	0	NIPBL_5041	pool11	1.72508	2.65453	1.4619	1.05881	360.854	1186.29	Nipped-B homolog (Drosophila)
EEF1E1	-0.524184	0.512437	0	0	EEF1E1_163	pool13	1.72139	2.45454	2.51893	0.190711	121.89	362.233	eukaryotic translation elongation factor 1 epsilon 1
RFC2	-0.00930604	1.91009	0	1	RFC2_1188	pool11	1.72005	-0.290643	6.08965	-0.638855	15.2735	92.2818	replication factor C subunit 2
FOXO1	-0.286593	-0.0303512	0	1	FOXO1_3174	pool12	1.718	-0.107609	-0.359855	5.62147	2730	2798.46	forkhead box O1
HIPK2	-0.484656	0.19552	1	0	HIPK2_12572	pool13	1.71717	0.911813	-0.835957	5.07567	110.305	181.504	homeodomain interacting protein kinase 2
DDIT4	-0.355364	0.162727	2	0	DDIT4_1680	pool11	1.7163	3.97417	-0.240011	1.41475	640.542	1202.17	DNA damage inducible transcript 4
HMOX1	-0.042297	1.29671	0	2	HMOX1_1572	pool11	1.71573	8.59533	-1.13375	-2.31438	554.041	414.341	heme oxygenase 1
PSMD1	-0.171791	0.466609	0	1	PSMD1_302	pool13	1.71533	-0.0856767	0.174167	5.0575	19.7798	32.056	proteasome 26S subunit, non-ATPase 1
TIPIN	-0.146789	1.59346	0	1	TIPIN_487	pool11	1.71503	2.69902	-0.208578	2.65464	48.4502	219.225	TIMELESS interacting protein
PMAIP1	-0.26544	0.04072	0	0	PMAIP1_1543	pool11	1.71453	6.5881	-0.987009	-0.457488	413.466	399.674	phorbol-12-myristate-13-acetate-induced protein 1
CHEK2	-0.268009	0.541664	0	1	CHEK2_1454	pool11	1.71384	-0.244259	5.8926	-0.506812	90.2726	170.798	checkpoint kinase 2
TCEA1	-0.414991	-0.37059	0	0	TCEA1_785	pool12	1.71302	-0.835914	-0.26189	6.23687	589.072	594.926	transcription elongation factor A1
BARD1	-0.250496	0.468266	1	1	BARD1_548	pool11	1.71291	-0.356308	6.11412	-0.619098	3.29894	157.129	BRCA1 associated RING domain 1
RPS3	-0.321482	1.08831	2	2	RPS3_230	pool11	1.71256	6.33036	-1.19267	0	0.428584	26.4897	ribosomal protein S3
PPP2R5C	-0.795337	-0.14917	0	0	PPP2R5C_1151	pool12	1.71219	-0.543246	0.665985	5.01384	232.315	282.015	protein phosphatase 2 regulatory subunit B', gamma
GTF2H1	-0.161592	0.234928	0	2	GTF2H1_1085	pool12	1.71152	-0.860932	4.24617	1.74931	1857.23	2814.61	general transcription factor IIH subunit 1
VAV3	-0.686977	-0.121708	2	0	VAV3_1592	pool12	1.70979	0.198519	-0.208492	5.13936	1632.77	2789.69	vav guanine nucleotide exchange factor 3
TMEM109	-0.247337	0.339419	0	0	TMEM109_1127	pool12	1.70772	-1.74005	3.09199	3.77121	76.1571	32.662	transmembrane protein 109
SFN	-0.952336	0.0544329	2	0	SFN_696	pool13	1.707	1.07899	2.39139	1.65063	59.8437	186.381	stratifin
CRY2	-0.236123	0.762205	0	0	CRY2_3388	pool13	1.70521	0.0350173	-0.493862	5.57447	64.8717	160.771	cryptochrome circadian clock 2
PSMC5	-0.140082	0.487983	0	0	PSMC5_118	pool13	1.70369	1.06218	6.12491	-2.07604	487.47	297.223	proteasome 26S subunit, ATPase 5
PLA2R1	-0.497983	0.0954467	1	0	PLA2R1_4060	pool13	1.70307	-0.104819	-0.293831	5.50787	658.932	740.738	phospholipase A2 receptor 1
FBXO45	-0.247798	0.615467	0	0	FBXO45_1231	pool13	1.69773	1.30956	3.43599	0.347634	71.1901	151.68	F-box protein 45
RPA4	-0.169027	0.285419	0	2	RPA4_767	pool12	1.69612	0.384061	-1.54277	6.24705	387.534	371.115	replication protein A4
CHEK1	-0.0791986	0.646853	0	1	CHEK1_671	pool11	1.69233	0.357514	-0.24169	4.96117	97.4736	179.4	checkpoint kinase 1
PSMD5	-0.572352	-0.147093	1	1	PSMD5_570	pool12	1.69221	0.228167	-1.96353	6.81198	836.546	779.688	proteasome 26S subunit, non-ATPase 5
SESN1	-2.08092	0.967784	1	0	SESN1_1624	pool13	1.69192	-0.0452348	1.84414	3.27686	81.2649	222.832	sestrin 1
MCM9	-0.261537	0.992679	1	1	MCM9_632	pool11	1.69072	0.0148411	3.4257	1.63161	99.9519	130.338	minichromosome maintenance 9 homologous recombination repair factor
REV3L	-0.213675	1.02872	1	1	REV3L_2005	pool11	1.69057	8.40917	-2.9065	-0.43095	1192.51	306.17	REV3 like, DNA directed polymerase zeta catalytic subunit
EP300	-0.262728	0.238222	0	1	EP300_2316	pool12	1.68954	0.463412	-1.27489	5.8801	563.686	490.842	E1A binding protein p300
MRPS26	-0.0335297	0.200315	0	1	MRPS26_959	pool12	1.68933	-1.14721	-0.199249	6.41445	1095.13	1155.81	mitochondrial ribosomal protein S26
NEK11	-0.466355	0.113961	0	0	NEK11_1608	pool12	1.68899	1.02193	5.5676	-1.52256	1272.08	861.524	NIMA related kinase 11
UBE2D3	-0.144966	1.08566	0	2	UBE2D3_1849	pool11	1.68594	1.40465	1.86908	1.7841	359.589	1168.07	ubiquitin conjugating enzyme E2D 3
HINFP	-0.363713	0.0902301	1	0	HINFP_1501	pool13	1.68561	-0.41689	0.0507267	5.42299	114.915	137.446	histone H4 transcription factor
SFRP2	-0.381847	0.182104	1	0	SFRP2_1856	pool13	1.68301	-1.08746	3.08811	3.04838	385.256	451.429	secreted frizzled-related protein 2
MACROD1	-0.0213631	0.798876	0	1	MACROD1_559	pool12	1.68198	2.54616	0.718386	1.7814	84.3495	257.92	MACRO domain containing 1
RAD52	-1.07058	-0.523748	3	0	RAD52_1337	pool12	1.68084	-0.0757905	-1.10826	6.22657	879.14	785.685	RAD52 homolog, DNA repair protein
HINFP	-0.363713	0.0902301	1	0	HINFP_2090	pool13	1.67939	3.23289	-1.36543	3.17072	39.0004	149.687	histone H4 transcription factor
TONSL	-0.26536	0.749092	0	1	TONSL_2059	pool13	1.67865	6.02811	-0.431262	-0.56089	32.4975	96.6871	tonsoku-like, DNA repair protein
SLX1A	-0.125286	0.581699	0	0	SLX1A_793	pool13	1.67634	-1.96166	6.36554	0.625153	360.603	322.15	SLX1 homolog A, structure-specific endonuclease subunit
TONSL	-0.26536	0.749092	0	1	TONSL_1391	pool13	1.67531	1.75322	5.92122	-2.64849	125.022	192.769	tonsoku-like, DNA repair protein
NSMCE2	-0.45892	-0.00528701	0	0	NSMCE2_468	pool12	1.67456	-1.22274	-0.000991673	6.2474	330.634	395.473	NSE2/MMS21 homolog, SMC5-SMC6 complex SUMO ligase
POLR2B	-1.92445	-0.391581	2	0	POLR2B_2625	pool13	1.67149	-0.194842	-0.456467	5.66577	169.281	256.819	polymerase (RNA) II (DNA directed) polypeptide B, 140kDa
C17orf70	-0.0884695	0.693575	0	1	C17orf70_1475	pool12	1.67111	-1.00951	0.238755	5.78409	548.281	578.388
CDC14B	-0.855426	-0.875496	2	1	CDC14B_4213	pool12	1.6701	0.00349168	-1.42824	6.43505	766.013	875.892	cell division cycle 14B
EGLN3	-0.245422	0.132356	0	1	EGLN3_1402	pool12	1.66985	-0.733794	4.8	0.943336	357.281	490.139	egl-9 family hypoxia-inducible factor 3
RECQL	-0.0297926	0.743042	0	1	RECQL_3277	pool11	1.66806	2.30697	0.635095	2.0621	405.619	1316.89	RecQ like helicase
NACC2	-2.18046	0.00983881	1	0	NACC2_1402	pool13	1.66803	-0.821455	6.67484	-0.849286	249.595	357.759	NACC family member 2
HMGN1	-0.0896424	1.15428	1	3	HMGN1_329	pool11	1.66728	2.18944	-0.728142	3.54054	502.853	509.713	high mobility group nucleosome binding domain 1
MRPS26	-0.0335297	0.200315	0	1	MRPS26_882	pool12	1.66578	0.752478	1.14963	3.09522	303.239	922.39	mitochondrial ribosomal protein S26
RRM2B	-0.400444	0.291154	0	0	RRM2B_3227	pool13	1.66548	0.329417	3.92771	0.739307	256.047	609.281	ribonucleotide reductase regulatory TP53 inducible subunit M2B
E2F1	-0.246417	0.380907	0	0	E2F1_918	pool12	1.66439	7.22226	-2.52387	0.294772	118.789	69.9809	E2F transcription factor 1
PSMD12	-0.517412	0.270916	3	0	PSMD12_826	pool13	1.66393	0	0.275727	4.71608	0	8.49798	proteasome 26S subunit, non-ATPase 12
BRSK1	-0.72262	0.00300702	1	0	BRSK1_2129	pool13	1.66239	0.179522	0.0426591	4.765	86.9052	136.655	BR serine/threonine kinase 1
SETD8	-0.256725	0.214101	0	0	SETD8_2534	pool12	1.66059	1.22025	-1.78023	5.54175	33.7854	85.3879
C9orf102	-0.156456	0.944622	0	0	C9orf102_2114	pool13	1.65758	0.844118	5.5729	-1.44429	291.321	303.116
PSMA7	-0.353302	0.113961	0	0	PSMA7_952	pool11	1.65713	5.95169	3.90319	-4.88347	3174.68	360.846	proteasome subunit alpha 7
ZAK	-0.248336	0.109914	0	0	ZAK_1130	pool12	1.65669	0.610739	-1.50334	5.86266	783.98	1073.45
DDIT4	-0.355364	0.162727	2	0	DDIT4_1681	pool11	1.65597	2.94625	1.23657	0.785093	498.278	1266.71	DNA damage inducible transcript 4
BRSK1	-0.72262	0.00300702	1	0	BRSK1_1313	pool13	1.65502	2.4101	-2.26026	4.81522	502.146	494.026	BR serine/threonine kinase 1
HINFP	-0.363713	0.0902301	1	0	HINFP_765	pool13	1.65275	0.0789797	-0.145801	5.02506	119.332	151.748	histone H4 transcription factor
CD44	-0.0711946	1.29499	1	2	CD44_494	pool11	1.64876	2.88191	0.814395	1.24997	166.132	485.646	CD44 molecule (Indian blood group)
PSEN1	-0.356844	0.288868	1	0	PSEN1_1478	pool13	1.64771	0.658996	-0.89917	5.18332	33.3146	39.0715	presenilin 1
IER3	-0.166853	0.522589	0	2	IER3_931	pool12	1.64688	-1.1715	2.38208	3.73005	136.712	146.542	immediate early response 3
NIPBL	-0.439735	0.792366	2	0	NIPBL_1981	pool11	1.64656	2.13856	2.7441	0.0570067	809.677	1758.93	Nipped-B homolog (Drosophila)
RFC3	-0.287856	0.103749	1	2	RFC3_807	pool12	1.64556	4.93668	0	0	0	9.87532	replication factor C subunit 3
PMS2	-1.17263	-0.143513	1	0	PMS2_1898	pool13	1.64493	-2.05712	1.29615	5.69577	148.517	265.103	PMS1 homolog 2, mismatch repair system component
POLR2G	-0.271809	0.149967	0	0	POLR2G_482	pool11	1.64417	-1.26031	0.204935	5.98789	80.5622	83.5626	polymerase (RNA) II (DNA directed) polypeptide G
PRMT6	-0.466101	-0.0156527	0	0	PRMT6_2125	pool12	1.63839	0.441999	-1.474	5.94717	434.256	313.805	protein arginine methyltransferase 6
MAPKAPK2	-0.328457	-0.0345631	0	0	MAPKAPK2_756	pool12	1.63759	-0.837644	0.079135	5.67128	243.384	306.876	mitogen-activated protein kinase-activated protein kinase 2
GTF2H2C	-0.682354	0.0887358	0	0	GTF2H2C_1406	pool13	1.63458	-0.350485	-0.382062	5.6363	1009.27	1099	GTF2H2 family member C
OBFC2B	-0.203981	0.27556	0	1	OBFC2B_1369	pool12	1.63424	-0.0655063	-0.682459	5.65069	951.898	989.291
MBD4	-0.200935	0.882397	0	0	MBD4_985	pool11	1.63276	1.90126	2.7537	0.243311	193.611	403.226	methyl-CpG binding domain 4 DNA glycosylase
CCNK	-0.42159	-0.0968015	1	0	CCNK_2572	pool12	1.63181	-0.284623	1.00046	4.17961	382.051	502.514	cyclin K
RFC1	-0.194227	0.238222	0	1	RFC1_3887	pool11	1.63107	-0.0701863	1.14596	3.81743	2668.66	5053.39	replication factor C subunit 1
CDK2	-0.140082	0.591082	0	3	CDK2_1948	pool11	1.62992	6.2241	-2.35819	1.02385	1997.64	1556.33	cyclin-dependent kinase 2
TAF9B	-0.633764	0.134955	0	0	TAF9B_564	pool13	1.62927	1.18405	-1.54775	5.2515	82.8668	109.367	TATA-box binding protein associated factor 9b
POLN	-0.24382	0.826522	0	0	POLN_1606	pool13	1.62259	6.19438	-7.22679	5.90019	186.539	59.0147	polymerase (DNA directed) nu
NEK1	-0.443456	0.316683	0	0	NEK1_4015	pool13	1.62231	0.485998	4.05879	0.322157	142.307	295.808	NIMA related kinase 1
ALKBH2	-0.280337	0.135489	0	1	ALKBH2_238	pool12	1.61937	-0.47486	0.0507043	5.28228	464.219	515.377	alkB homolog 2, alpha-ketoglutarate-dependent dioxygenase
MIF	-0.268653	0.0142593	0	0	MIF_95	pool11	1.61688	1.57836	-0.0363651	3.30865	756.046	1205.26	macrophage migration inhibitory factor (glycosylation-inhibiting factor)
ZRANB3	-1.25964	0.973875	1	0	ZRANB3_475	pool13	1.61383	0.327871	3.89347	0.620138	111.771	243.622	zinc finger RANBP2-type containing 3
POLR2G	-0.271809	0.149967	0	0	POLR2G_105	pool11	1.61188	-1.1835	5.64802	0.371114	861.639	794.561	polymerase (RNA) II (DNA directed) polypeptide G
RBM38	-0.179339	0.598772	0	1	RBM38_2256	pool11	1.61181	5.16648	0.649469	-0.980508	1111.45	1478.01	RNA binding motif protein 38
OGG1	-1.18509	0.56639	0	0	OGG1_860	pool13	1.61157	2.88321	0.881598	1.06989	0.450864	6.09962	8-oxoguanine DNA glycosylase
ATXN3	-0.500313	1.48545	1	1	ATXN3_3030	pool13	1.60827	-0.0646675	3.0807	1.80876	316.34	907.077	ataxin 3
C9orf80	-1.41117	0.0430636	0	0	C9orf80_514	pool13	1.60658	-0.670478	6.52384	-1.03364	1418.59	1182.64
OTUB1	-0.865504	-0.0614302	0	0	OTUB1_650	pool13	1.60602	0.328423	4.65474	-0.165098	39.8589	57.1849	OTU deubiquitinase, ubiquitin aldehyde binding 1
SHFM1	-0.267606	0.369776	1	1	SHFM1_120	pool11	1.60501	-0.49517	4.95057	0.359629	49.5905	71.0968	split hand/foot malformation (ectrodactyly) type 1
PSMD10	-0.20204	0.605198	0	0	PSMD10_394	pool13	1.60212	0.0389907	1.5059	3.26148	128.49	374.019	proteasome 26S subunit, non-ATPase 10
SMARCA5	-0.115998	0.584693	0	1	SMARCA5_2936	pool11	1.59944	1.13524	1.73925	1.92382	408.152	1247.77	SWI/SNF related, matrix associated, actin dependent regulator of chromatin, subfamily a, member 5
TDP1	-0.230106	0.117419	0	0	TDP1_2318	pool12	1.59894	0.27469	-1.81307	6.3352	413.86	514.951	tyrosyl-DNA phosphodiesterase 1
INO80D	-1.53611	0.11081	1	0	INO80D_6489	pool13	1.59744	-0.501313	-0.082101	5.37573	38.9277	47.8524	INO80 complex subunit D
MLH1	-0.303032	0.0592346	1	0	MLH1_355	pool11	1.59508	1.11691	5.4064	-1.73806	1014.18	928.619	mutL homolog 1
TCEA1	-0.414991	-0.37059	0	0	TCEA1_2250	pool12	1.59202	0.0471063	6.72284	-1.99388	1861.3	1261.02	transcription elongation factor A1
MSX1	-0.048274	0.278602	0	1	MSX1_1659	pool11	1.58934	3.50445	1.95143	-0.687851	1276.23	1585.03	msh homeobox 1
ATAD5	-0.105795	0.420674	0	2	ATAD5_580	pool12	1.5866	0.244701	3.06069	1.45442	244.462	717.354	ATPase family, AAA domain containing 5
DTL	-0.370081	-0.0185892	2	0	DTL_3143	pool11	1.58614	0.757574	2.98522	1.01562	529.33	1217.37	denticleless E3 ubiquitin protein ligase homolog
XRCC4	-0.0485168	0.883724	0	1	XRCC4_669	pool11	1.58605	0.616123	1.80785	2.33418	136.12	379.057	X-ray repair complementing defective repair in Chinese hamster cells 4
CHEK1	-0.0791986	0.646853	0	1	CHEK1_185	pool11	1.58502	2.28746	1.73949	0.728127	810.015	2251.18	checkpoint kinase 1
SPRED1	-3.09691	0.46572	0	0	SPRED1_5651	pool13	1.58281	-0.561988	0.73758	4.57283	150.503	229.634	sprouty-related, EVH1 domain containing 1
ASH2L	-0.686766	0.0821795	0	0	ASH2L_507	pool13	1.57934	-0.868986	0.371877	5.23513	680.095	689.101	ash2 (absent, small, or homeotic)-like (Drosophila)
RAD52	-1.07058	-0.523748	3	0	RAD52_461	pool12	1.57816	-0.679002	3.67573	1.73774	502.728	697.779	RAD52 homolog, DNA repair protein
SFPQ	-1.17653	-1.42713	3	0	SFPQ_2208	pool11	1.57745	-0.693556	6.20733	-0.781411	486.35	526.849	splicing factor proline/glutamine-rich
SETD8	-0.256725	0.214101	0	0	SETD8_2535	pool12	1.57632	-0.115838	-1.09435	5.93915	227.616	220.547
PTTG1	-0.224317	0.272866	0	1	PTTG1_670	pool11	1.57392	3.19739	5.68981	-4.16543	605.93	485.084	pituitary tumor-transforming 1
SMC3	-0.088576	0.488384	0	1	SMC3_995	pool12	1.5697	0.897707	-2.1755	5.9869	550.462	314.755	structural maintenance of chromosomes 3
MSH5	-0.236572	0.477947	0	0	MSH5_808	pool13	1.56594	-0.0609267	0.373778	4.38497	231.5	280.256	mutS homolog 5
STRA13	-0.34515	0.0381994	0	1	STRA13_699	pool12	1.56368	-0.249524	-1.14741	6.08797	1109.76	903.403	stimulated by retinoic acid 13
BAZ1B	-0.90309	0.487182	0	0	BAZ1B_5150	pool13	1.56078	0.457566	0.599083	3.6257	251.057	440.801	bromodomain adjacent to zinc finger domain 1B
POLB	-0.593971	0.335358	0	0	POLB_885	pool13	1.55628	-0.163738	6.69233	-1.85975	340.17	294.377	polymerase (DNA directed), beta
ANKRD1	-0.442493	0.517841	0	0	ANKRD1_1532	pool13	1.55628	2.67766	-0.399121	2.39029	293.946	839.919	ankyrin repeat domain 1
UVRAG	-1.82102	0.0484682	1	0	UVRAG_2659	pool13	1.55569	1.36791	-0.634626	3.9338	328.681	474.002	UV radiation resistance associated
NCOA6	-2.72125	-1.58004	1	0	NCOA6_1107	pool12	1.55556	2.34897	2.31772	0	4.87096	27.4933	nuclear receptor coactivator 6
TDG	-0.186753	0.686766	0	0	TDG_821	pool11	1.55536	3.12244	1.16172	0.381918	198.007	368.127	thymine DNA glycosylase
RAD21	-0.185886	1.0575	0	0	RAD21_3619	pool13	1.55432	-0.682089	-0.92461	6.26967	62.17	113.191	RAD21 cohesin complex component
FBXO45	-0.247798	0.615467	0	0	FBXO45_2866	pool13	1.55402	0.765853	3.94137	-0.0451509	141.146	331.282	F-box protein 45
SESN1	-2.08092	0.967784	1	0	SESN1_1081	pool13	1.55191	-0.0107136	4.58162	0.0848187	77.5904	94.4897	sestrin 1
PSMA5	-0.276873	0.15422	0	0	PSMA5_1179	pool12	1.54984	-0.619228	-1.18643	6.45516	1075.86	1079.91	proteasome subunit alpha 5
CUL4B	-0.094906	0.413638	0	0	CUL4B_3623	pool11	1.54865	1.53593	4.50203	-1.392	296.856	383.91	cullin 4B
IER3	-0.166853	0.522589	0	2	IER3_606	pool12	1.5455	2.96666	-3.44823	5.11806	332.424	348.882	immediate early response 3
XRCC1	-0.0085967	1.0752	0	1	XRCC1_197	pool12	1.54514	-0.808084	6.60828	-1.16478	289.251	228.889	X-ray repair complementing defective repair in Chinese hamster cells 1
PPP4R2	-0.844664	-0.0468688	2	0	PPP4R2_397	pool13	1.54459	-7.14775	5.57904	6.20248	384.262	72.4198	protein phosphatase 4 regulatory subunit 2
PCNA	-0.219107	0.263285	1	0	PCNA_442	pool11	1.54441	1.99369	5.35761	-2.71807	1674.48	1102.83	proliferating cell nuclear antigen
RTEL1	-0.204746	0.26496	0	0	RTEL1_1899	pool12	1.54184	-1.51111	6.79408	-0.657449	118.407	141.678	regulator of telomere elongation helicase 1
FOXM1	-0.309627	0.203564	0	0	FOXM1_787	pool11	1.54168	4.7211	0.204935	-0.300993	0.0773308	8.50922	forkhead box M1
POLR2E	-0.850781	-0.447819	1	1	POLR2E_1244	pool12	1.54	-0.495495	-0.697942	5.81344	1073.05	917.414	polymerase (RNA) II (DNA directed) polypeptide E, 25kDa
PSMB8	-0.254223	0.306713	1	1	PSMB8_898	pool11	1.53884	1.24122	5.23475	-1.85944	433.538	746.604	proteasome subunit beta 8
INTS3	-0.390939	0.145876	0	1	INTS3_1500	pool12	1.53819	-1.28295	-1.08468	6.98221	262.594	501.84	integrator complex subunit 3
BRIP1	-0.331335	-0.0308638	1	1	BRIP1_2011	pool12	1.53711	-0.750468	-0.025203	5.38699	668.013	551.202	BRCA1 interacting protein C-terminal helicase 1
TAOK1	-0.24306	0.203912	0	0	TAOK1_10008	pool12	1.53587	0.630516	0.500779	3.47631	713.999	1457.97	TAO kinase 1
SLX1A	-0.125286	0.581699	0	0	SLX1A_661	pool13	1.53468	2.05209	0.231372	2.32058	321.888	729.162	SLX1 homolog A, structure-specific endonuclease subunit
C16orf5	-0.498941	0.461426	0	1	C16orf5_460	pool13	1.53214	0.651018	3.75387	0.191514	220.065	644.117
ATRX	-1.04769	1.23582	2	0	ATRX_1740	pool13	1.5321	0.849671	0.285902	3.46074	245.77	494.498	alpha thalassemia/mental retardation syndrome X-linked
PSMD7	-0.569441	-0.0791986	1	1	PSMD7_653	pool12	1.53199	-0.0930444	-1.39843	6.08745	143.076	136.414	proteasome 26S subunit, non-ATPase 7
RAD51L1	-0.145148	0.229516	0	0	RAD51L1_562	pool12	1.53136	-0.874072	5.89541	-0.42727	578.485	430.364
PLA2R1	-0.497983	0.0954467	1	0	PLA2R1_890	pool13	1.53131	-1.66455	2.49798	3.7605	206.174	197.38	phospholipase A2 receptor 1
WAC	-0.22541	0.81051	0	0	WAC_2804	pool13	1.53025	1.60564	3.30949	-0.324375	239.537	706.565	WW domain containing adaptor with coiled-coil
MAPKAPK2	-0.328457	-0.0345631	0	0	MAPKAPK2_766	pool12	1.52918	0.0997132	-1.05679	5.5446	391.237	311.216	mitogen-activated protein kinase-activated protein kinase 2
CUL4B	-0.094906	0.413638	0	0	CUL4B_520	pool11	1.52901	2.36165	2.65516	-0.429793	2006.77	3578.84	cullin 4B
BRE	-0.400663	0.267124	1	0	BRE_536	pool13	1.52319	1.00509	2.13947	1.425	126.645	366.988	brain and reproductive organ-expressed (TNFRSF1A modulator)
C9orf119	-0.572676	-0.287519	2	0	C9orf119_664	pool12	1.52234	-0.404565	-1.60199	6.57358	1439.65	1083.27
FOXO1	-0.286593	-0.0303512	0	1	FOXO1_2939	pool12	1.51943	-0.919737	-0.488864	5.96688	1419.68	1173.89	forkhead box O1
C11orf30	-0.191249	1.63264	0	0	C11orf30_2294	pool13	1.5156	0.213981	0.299012	4.03381	288.442	448.545
CCNG1	-0.186619	0.613144	0	1	CCNG1_1345	pool11	1.51466	3.47708	-2.07089	3.13779	2777.45	2347.78	cyclin G1
UBR5	-0.0106392	0.795609	0	2	UBR5_8028	pool11	1.51183	3.2821	1.25836	-0.00496716	449.165	1069.69	ubiquitin protein ligase E3 component n-recognin 5
RAD23B	-0.421132	0.0667659	1	0	RAD23B_871	pool13	1.50992	1.22776	-1.40493	4.70691	108.24	152.316	RAD23 homolog B, nucleotide excision repair protein
PARG	-0.382057	0.313811	1	0	PARG_3049	pool13	1.50972	-1.00763	-0.963706	6.50048	472.836	550.298	poly(ADP-ribose) glycohydrolase
MCM7	-0.00784429	0.760951	0	3	MCM7_880	pool11	1.50562	1.1549	2.67144	0.690525	496.133	1403.26	minichromosome maintenance complex component 7
DDB1	-0.97265	1.28567	1	1	DDB1_332	pool13	1.50286	0.606698	6.15911	-2.25721	1999	2017.93	damage specific DNA binding protein 1
POLD3	-0.316503	0.0316572	0	0	POLD3_798	pool11	1.5009	3.00538	2.66307	-1.16574	814.863	1237.18	polymerase (DNA-directed), delta 3, accessory subunit
PTPN11	-0.535809	-0.0156978	1	0	PTPN11_4449	pool13	1.50059	1.53991	0.760751	2.20111	30.1645	88.3919	protein tyrosine phosphatase, non-receptor type 11
FLJ35220	-0.294307	0.876802	0	0	FLJ35220_402	pool13	1.4975	1.91504	1.30959	1.26787	74.3657	203.773
MC1R	-0.0244303	0.504872	2	0	MC1R_567	pool13	1.49663	0.833064	1.1349	2.52193	273.226	685.139	melanocortin 1 receptor
EYA1	-0.218604	0.938548	0	1	EYA1_2864	pool13	1.49532	0.225435	5.90732	-1.64681	58.0241	115.231	EYA transcriptional coactivator and phosphatase 1
ZAK	-0.248336	0.109914	0	0	ZAK_607	pool12	1.49433	0.4696	-1.30061	5.31399	1616.12	1382
C17orf70	-0.0884695	0.693575	0	1	C17orf70_2850	pool12	1.49291	0.948699	3.0949	0.435148	10.3863	24.4155
PML	-0.159329	0.491066	0	0	PML_687	pool12	1.49011	1.56633	5.95781	-3.05381	84.3614	81.6622	promyelocytic leukemia
DDX5	-1.22695	-0.541967	1	0	DDX5_2304	pool12	1.48898	1.66126	-2.80332	5.609	581.887	375.259	DEAD-box helicase 5
POLG	-2.11351	0.900665	1	0	POLG_3433	pool13	1.4889	-0.143763	5.55774	-0.947278	424.294	441.183	polymerase (DNA directed), gamma
E2F1	-0.246417	0.380907	0	0	E2F1_1643	pool12	1.48812	-2.24042	6.85626	-0.15149	218.058	226.061	E2F transcription factor 1
EEPD1	-0.188224	0.299729	0	1	EEPD1_4635	pool12	1.48772	0.614668	-1.95444	5.80292	676.163	581.596	endonuclease/exonuclease/phosphatase family domain containing 1
MAPK12	-0.0454198	1.00966	0	0	MAPK12_1738	pool13	1.48758	1.47989	2.11052	0.872335	198.332	560.627	mitogen-activated protein kinase 12
CEBPG	-0.0174574	0.852942	0	2	CEBPG_2634	pool11	1.48748	3.19415	-5.68976	6.95804	1205.53	224.301	CCAAT/enhancer binding protein gamma
CDKN2D	-0.359519	0.89279	0	0	CDKN2D_644	pool13	1.48447	0.610209	2.95976	0.88343	204.212	542.188	cyclin-dependent kinase inhibitor 2D (p19, inhibits CDK4)
RAD50	-0.164373	0.374996	1	2	RAD50_4381	pool12	1.48433	-0.621914	-0.0185753	5.09347	761.619	953.611	RAD50 double strand break repair protein
PARP3	-0.0959339	0.856673	0	1	PARP3_964	pool11	1.48406	0.672808	3.59283	0.186543	133.72	206.342	poly(ADP-ribose) polymerase family member 3
PSME2	-0.277119	0.287771	0	1	PSME2_457	pool11	1.48265	0.98094	0.721842	2.74516	661.925	1493.1	proteasome activator subunit 2
GTF2H1	-0.161592	0.234928	0	2	GTF2H1_2797	pool12	1.48084	-0.182191	-1.97347	6.59819	2746.28	2517.28	general transcription factor IIH subunit 1
TAOK1	-0.24306	0.203912	0	0	TAOK1_10050	pool12	1.48062	-2.54066	6.69789	0.284638	238.072	148.915	TAO kinase 1
FNIP2	-1.16877	0.031377	1	0	FNIP2_425	pool13	1.4791	-0.100516	1.15057	3.38723	204.812	374.592	folliculin interacting protein 2
TP53BP1	-0.688458	0.139004	0	1	TP53BP1_2429	pool12	1.477	0.251769	0.0269706	4.15225	608.15	871.535	tumor protein p53 binding protein 1
POLR2J	-0.0238335	0.955068	0	1	POLR2J_563	pool11	1.47447	4.4234	0	0	0	6.81913	polymerase (RNA) II (DNA directed) polypeptide J, 13.3kDa
INO80	-2.0655	-0.584359	1	0	INO80_474	pool13	1.47204	0.585592	-1.13561	4.96612	12.6466	27.7882	INO80 complex subunit
C15orf42	-2.23657	1.21112	0	0	C15orf42_3317	pool13	1.47124	3.02352	-1.2192	2.60939	50.2897	96.364
XRCC3	-0.190373	0.323855	1	2	XRCC3_76	pool12	1.46982	0.863246	-0.528624	4.07484	648.862	659.894	X-ray repair complementing defective repair in Chinese hamster cells 3
SUMO1	-0.481354	0.900319	0	0	SUMO1_430	pool13	1.46917	0.248095	4.71784	-0.558418	188.022	188.255	small ubiquitin-like modifier 1
MRPS35	-0.251657	0.765483	2	0	MRPS35_1736	pool13	1.46823	0.557999	2.97243	0.874258	567.68	1232.89	mitochondrial ribosomal protein S35
DCLRE1C	-0.257432	0.440093	0	0	DCLRE1C_718	pool11	1.46757	6.89248	-2.1378	-0.351986	1321.77	1733.61	DNA cross-link repair 1C
RAD1	-0.19627	0.313006	0	1	RAD1_774	pool12	1.46441	0.589935	6.68721	-2.88393	403.919	268.999	RAD1 checkpoint DNA exonuclease
DCLRE1B	-0.113453	0.50404	0	1	DCLRE1B_1898	pool11	1.46349	1.4393	5.75954	-2.80837	1132.38	892.213	DNA cross-link repair 1B
TWIST1	-0.75721	-0.0106392	0	0	TWIST1_811	pool12	1.46243	0.6027	0.122293	3.66229	199.665	292.839	twist family bHLH transcription factor 1
SMC5	-0.0109063	0.585528	0	1	SMC5_2808	pool11	1.46055	-2.04747	0.529602	5.89953	2656.53	1372.52	structural maintenance of chromosomes 5
MGMT	-1.01323	0.0583892	0	0	MGMT_124	pool13	1.46008	2.13175	-1.90585	4.15433	590.017	553.038	O-6-methylguanine-DNA methyltransferase
MMS22L	-0.475734	-0.0468204	1	0	MMS22L_7635	pool13	1.46007	0.110755	6.17471	-1.90525	872.378	725.593	MMS22 like, DNA repair protein
POLR2F	-0.327717	-0.0323116	0	1	POLR2F_1301	pool12	1.46002	-1.61216	0.233109	5.75911	674.287	569.042	polymerase (RNA) II (DNA directed) polypeptide F
C9orf102	-0.156456	0.944622	0	0	C9orf102_3079	pool13	1.45709	1.77731	2.4213	0.172674	438.754	1123.38
SNAI2	0	1.47237	1	2	SNAI2_1222	pool11	1.45484	-2.59058	0.776777	6.17831	605.144	275.482	snail family zinc finger 2
ASTE1	-0.0715529	0.743282	0	1	ASTE1_1247	pool11	1.45147	4.8619	5.20797	-5.71544	154.076	69.3181	asteroid homolog 1 (Drosophila)
XIAP	-0.0956632	0.61261	0	0	XIAP_3132	pool13	1.45123	1.117	1.48525	1.75145	255.231	687.376	X-linked inhibitor of apoptosis
SMC3	-0.088576	0.488384	0	1	SMC3_905	pool12	1.4507	1.06853	-0.762433	4.04602	127.198	127.816	structural maintenance of chromosomes 3
SLX4	-0.303294	0.473402	0	0	SLX4_840	pool13	1.45031	1.39308	1.68152	1.27632	104.868	293.498	SLX4 structure-specific endonuclease subunit
TOPBP1	-0.538952	-0.125228	1	1	TOPBP1_5310	pool12	1.44872	-0.395712	-1.21878	5.96065	4095.86	3066.45	topoisomerase (DNA) II binding protein 1
DTX3L	-2.17393	-0.113904	0	0	DTX3L_4053	pool12	1.4477	0.0191051	5.06801	-0.744018	441.974	482.398	deltex 3 like, E3 ubiquitin ligase
RBM38	-0.179339	0.598772	0	1	RBM38_1266	pool11	1.44571	1.10736	3.1102	0.119555	649.315	1276.89	RNA binding motif protein 38
MAD2L2	-0.167491	0.375099	0	0	MAD2L2_908	pool12	1.44555	1.60554	1.68374	1.04736	289.712	778.979	MAD2 mitotic arrest deficient-like 2 (yeast)
ERCC2	-0.481223	0.399681	1	0	ERCC2_856	pool13	1.44474	0.540929	2.66386	1.12944	12.3186	32.7439	excision repair cross-complementation group 2
REV3L	-0.213675	1.02872	1	1	REV3L_1309	pool11	1.44373	3.40603	3.35709	-2.43193	226.005	431.039	REV3 like, DNA directed polymerase zeta catalytic subunit
IKBKE	-0.143452	0.456926	1	0	IKBKE_2111	pool11	1.44081	2.31477	1.48057	0.527082	1882.77	4142.26	inhibitor of kappa light polypeptide gene enhancer in B-cells, kinase epsilon
CIB1	-0.200246	0.175809	0	0	CIB1_928	pool11	1.43939	1.44571	2.95539	-0.0829483	599.787	1548.38	calcium and integrin binding 1
SLX4	-0.303294	0.473402	0	0	SLX4_5395	pool13	1.43733	-0.156138	4.99814	-0.530023	39.5406	39.7681	SLX4 structure-specific endonuclease subunit
PSMD6	-0.022185	1.27654	0	1	PSMD6_1176	pool13	1.43395	0.947996	2.13142	1.22242	511.449	1275.8	proteasome 26S subunit, non-ATPase 6
ABL1	-0.000782434	0.954677	0	1	ABL1_2949	pool11	1.4338	-7.24313	5.20372	6.34082	886.485	152.578	ABL proto-oncogene 1, non-receptor tyrosine kinase
NIPBL	-0.439735	0.792366	2	0	NIPBL_3193	pool11	1.43345	1.44292	0.66578	2.19166	1042.69	2765.32	Nipped-B homolog (Drosophila)
FBXW7	-1.23136	-0.149721	2	0	FBXW7_61	pool13	1.42816	-1.01821	-1.43949	6.74218	197.769	182.329	F-box and WD repeat domain containing 7
DEM1	-1.5376	-0.162727	0	0	DEM1_837	pool13	1.42812	-0.465505	3.48799	1.26187	402.571	612.857
RPS27A	-0.609065	0.237096	0	0	RPS27A_340	pool12	1.42648	-0.852847	5.01407	0.118205	84.7425	68.6999	ribosomal protein S27a
AP5S1	-0.152242	0.390086	0	0	AP5S1_1670	pool12	1.42288	-1.10066	0.995861	4.37345	67.0381	63.3785	adaptor related protein complex 5 sigma 1 subunit
UBR5	-0.0106392	0.795609	0	2	UBR5_10849	pool11	1.4224	3.02163	0.463261	0.782317	799.458	1561.35	ubiquitin protein ligase E3 component n-recognin 5
NTHL1	-0.966576	0.789681	0	0	NTHL1_996	pool13	1.42182	-1.17191	2.17151	3.26585	104.872	169.396	nth-like DNA glycosylase 1
ERCC3	-0.305307	0.341035	1	0	ERCC3_2151	pool13	1.41802	-0.5845	3.98608	0.852461	361.063	614.353	excision repair cross-complementation group 3
PARP2	-0.418847	0.152427	1	0	PARP2_306	pool13	1.41677	-1.09517	-0.327559	5.67304	23.9406	44.0023	poly(ADP-ribose) polymerase 2
ANKRD1	-0.442493	0.517841	0	0	ANKRD1_1349	pool13	1.4167	0.334515	-1.64402	5.55961	137.776	124.64	ankyrin repeat domain 1
UBE2A	-0.443697	-0.0533022	1	0	UBE2A_178	pool11	1.41597	1.34574	4.89617	-1.99398	87.7672	231.749	ubiquitin conjugating enzyme E2A
IKBKG	-1.54061	0.769296	0	0	IKBKG_574	pool13	1.41518	1.51764	4.44056	-1.71266	279.876	144.464	inhibitor of kappa light polypeptide gene enhancer in B-cells, kinase gamma
MRPS35	-0.251657	0.765483	2	0	MRPS35_1673	pool13	1.4148	0.920199	0.219768	3.10444	163.867	342.363	mitochondrial ribosomal protein S35
BRCA1	-0.271322	0.31007	1	0	BRCA1_663	pool11	1.41312	-1.44465	5.87512	-0.191122	144.442	136.246	breast cancer 1
USP1	-0.0369681	0.775208	0	0	USP1_424	pool11	1.40959	2.69401	1.65303	-0.118285	476.272	1083.86	ubiquitin specific peptidase 1
POLR2D	-0.124187	1.73993	1	1	POLR2D_859	pool11	1.40768	9.35155	-0.882295	-4.24622	10.4164	217.873	polymerase (RNA) II (DNA directed) polypeptide D
SP100	-0.115998	0.95117	1	2	SP100_514	pool11	1.4029	2.30279	1.9059	0	0	2.22718	SP100 nuclear antigen
BLM	-1.15989	-0.430275	1	0	BLM_925	pool11	1.40198	3.15631	1.26338	-0.213757	2112.26	3051.65	Bloom syndrome RecQ like helicase
POLD1	-0.00230788	1.40671	0	0	POLD1_1236	pool11	1.40115	5.75333	-1.33881	-0.211082	60.7208	50.5386	polymerase (DNA directed), delta 1, catalytic subunit
PTTG1	-0.224317	0.272866	0	1	PTTG1_366	pool11	1.39707	0.939407	4.91596	-1.66416	180.753	187.009	pituitary tumor-transforming 1
DYRK1A	-0.643592	0.22878	1	0	DYRK1A_4693	pool13	1.3943	-0.130825	2.23204	2.08167	307.056	555.5	dual specificity tyrosine phosphorylation regulated kinase 1A
REV3L	-0.213675	1.02872	1	1	REV3L_8673	pool11	1.39248	0	3.00742	1.17001	5.93677	17.3633	REV3 like, DNA directed polymerase zeta catalytic subunit
EXO1	-0.194092	0.452964	0	0	EXO1_1387	pool11	1.39185	1.34928	-1.11647	3.94272	686.798	1002.64	exonuclease 1
PSMD2	-0.0897492	0.471083	0	1	PSMD2_2885	pool12	1.3902	-1.17007	-0.835997	6.17666	933.698	697.796	proteasome 26S subunit, non-ATPase 2
POLB	-0.593971	0.335358	0	0	POLB_751	pool13	1.388	-1.27021	-0.536637	5.97084	147.004	166.057	polymerase (DNA directed), beta
MNAT1	-0.910095	0.716021	0	0	MNAT1_383	pool13	1.38787	0.341636	0.417442	3.40453	748.552	1474.24	MNAT CDK-activating kinase assembly factor 1
EPHA2	-0.00935041	1.36452	0	1	EPHA2_2977	pool11	1.38622	4.65578	-1.20532	0.708197	365.468	497.442	EPH receptor A2
MLH1	-0.303032	0.0592346	1	0	MLH1_356	pool11	1.38553	4.90497	-1.05373	0.305341	2023.2	2150.94	mutL homolog 1
RPS27L	-0.040577	1.01682	0	0	RPS27L_359	pool11	1.38274	1.79898	1.27517	1.07408	312.605	835.873	ribosomal protein S27 like
SLC30A9	-0.722391	0.3213	1	0	SLC30A9_2043	pool13	1.38228	0.581177	-0.104023	3.66969	475.992	937.62	solute carrier family 30 (zinc transporter), member 9
FANCG	-0.39545	0.157204	1	0	FANCG_1276	pool11	1.38217	1.90838	5.61132	-3.37319	5.28926	90.2738	Fanconi anemia complementation group G
NEIL1	-1.09963	-0.308035	3	0	NEIL1_1496	pool13	1.38083	-0.618883	-0.603286	5.36464	85.161	68.6264	nei like DNA glycosylase 1
NEIL3	-0.167172	0.397181	0	0	NEIL3_993	pool11	1.37979	2.58182	1.18607	0.371482	1798.63	3731.25	nei like DNA glycosylase 3
LYN	-0.0104612	1.78781	0	0	LYN_838	pool11	1.37882	3.60736	-0.155318	0.68441	855.867	1672.14	LYN proto-oncogene, Src family tyrosine kinase
RNF169	-0.572514	0.0512937	1	1	RNF169_7296	pool12	1.37412	-0.0990907	2.71349	1.50796	335.606	716.971	ring finger protein 169
TAF9B	-0.633764	0.134955	0	0	TAF9B_1650	pool13	1.37323	1.00138	3.98105	-0.862721	337.228	457.098	TATA-box binding protein associated factor 9b
ATM	-0.65738	0.675306	1	1	ATM_8670	pool12	1.36999	-0.417285	-0.579439	5.10668	705.176	576.885	ATM serine/threonine kinase
TRIP12	-0.022505	0.777804	0	1	TRIP12_4215	pool12	1.36961	0.234968	4.01537	-0.141496	54.3945	114.337	thyroid hormone receptor interactor 12
C10orf90	-0.571217	0.804931	1	0	C10orf90_1257	pool13	1.36788	0.626733	4.12733	-0.650412	561.242	845.928	chromosome 10 open reading frame 90
WDR33	-1.88941	-0.465339	2	0	WDR33_479	pool13	1.36691	-0.602446	-0.578622	5.28181	578.367	526.99	WD repeat domain 33
ASTE1	-0.0715529	0.743282	0	1	ASTE1_2244	pool11	1.36395	3.76277	-0.925357	1.25444	5482.52	7394.54	asteroid homolog 1 (Drosophila)
PSMB6	-0.344381	-0.160208	0	0	PSMB6_385	pool12	1.36046	-1.30644	-1.45367	6.84151	1938	1347.14	proteasome subunit beta 6
HMGA2	-0.267928	0.785686	1	0	HMGA2_992	pool13	1.35656	1.6088	2.39224	0.0686455	245.132	540.494	high mobility group AT-hook 2
NDRG1	-0.690796	0.0928575	0	0	NDRG1_2784	pool13	1.35524	4.12804	-1.40235	1.34002	311.039	412.805	N-myc downstream regulated 1
HMGB1	-0.262807	0.298173	1	1	HMGB1_1726	pool11	1.35315	1.39566	1.68551	0.978284	65.9549	188.521	high mobility group box 1
IRF3	-0.242225	0.31894	0	0	IRF3_79	pool12	1.35087	-0.169622	6.24407	-2.02184	1110.78	512.245	interferon regulatory factor 3
MDM4	-0.337148	0.0761345	0	0	MDM4_5207	pool12	1.35069	0.317107	-2.39404	6.129	1522.63	1281.02	MDM4, p53 regulator
TDP2	-0.660549	1.37882	0	0	TDP2_1890	pool13	1.34991	0.623185	1.86579	1.56075	541.528	1272.29	tyrosyl-DNA phosphodiesterase 2
MORF4L1	-0.674895	0.901702	1	0	MORF4L1_610	pool13	1.34722	7.95384	-2.75085	-1.16131	25.4287	129.556	mortality factor 4 like 1
PYCARD	-0.244811	0.488117	0	1	PYCARD_146	pool11	1.34604	8.01542	1.35543	-5.33275	359.257	154.164	PYD and CARD domain containing
TIPRL	-3	0.904831	2	0	TIPRL_546	pool13	1.34525	0.739139	2.87243	0.424175	298.768	755.838	TOR signaling pathway regulator
ALKBH2	-0.280337	0.135489	0	1	ALKBH2_657	pool12	1.34405	-0.00347415	-1.02735	5.06298	722.259	505.618	alkB homolog 2, alpha-ketoglutarate-dependent dioxygenase
FZR1	-0.561616	0.125518	2	0	FZR1_3119	pool13	1.34151	1.64542	-2.01462	4.39375	144.148	185.394	fizzy/cell division cycle 20 related 1
CASP2	-0.168642	0.670602	0	1	CASP2_3113	pool11	1.33963	2.11211	-0.29216	2.19895	2281.66	4237.29	caspase 2
GTF2H4	-0.12384	0.815309	0	1	GTF2H4_1682	pool11	1.33728	0.632046	2.39838	0.981416	168.661	320.795	general transcription factor IIH subunit 4
USP7	-0.349207	0.440093	0	0	USP7_2098	pool13	1.33687	0.294554	1.80284	1.91322	78.6318	194.451	ubiquitin specific peptidase 7 (herpes virus-associated)
OGG1	-1.18509	0.56639	0	0	OGG1_81	pool13	1.33453	-0.264009	0.435051	3.83253	63.6944	88.5775	8-oxoguanine DNA glycosylase
SPRED2	-0.438899	0.69702	1	0	SPRED2_8	pool13	1.33335	2.01675	0.105228	1.87808	42.5172	134.67	sprouty-related, EVH1 domain containing 2
AEN	-0.165706	0.515985	0	1	AEN_1028	pool11	1.33288	7.94267	-8.72462	4.78058	1174.89	145.057	apoptosis enhancing nuclease
TYMS	-0.197295	0.287266	1	0	TYMS_578	pool11	1.3309	1.94083	1.95702	0.0948483	364.129	766.68	thymidylate synthetase
CRY2	-0.236123	0.762205	0	0	CRY2_3356	pool13	1.33059	0.373474	3.76624	-0.147944	251.947	317.135	cryptochrome circadian clock 2
PSMB9	-0.193616	0.193345	0	0	PSMB9_520	pool11	1.33016	0.839811	-1.78897	4.93965	1686.94	703.568	proteasome subunit beta 9
NUDT1	-0.198528	0.427128	1	1	NUDT1_388	pool11	1.3291	-1.25862	2.24406	3.00185	389.428	284.085	nudix hydrolase 1
FANCE	-0.05532	1.21183	0	0	FANCE_667	pool11	1.32815	0.680708	-2.13566	5.4394	166.196	171.931	Fanconi anemia complementation group E
PYCARD	-0.244811	0.488117	0	1	PYCARD_140	pool11	1.32757	5.67139	-0.769091	-0.919587	0.862754	16.8344	PYD and CARD domain containing
MORF4L2	-0.229811	0.24382	0	1	MORF4L2_170	pool12	1.32621	-0.230605	-0.414256	4.6235	288.517	259.901	mortality factor 4 like 2
TYMS	-0.197295	0.287266	1	0	TYMS_626	pool11	1.32619	2.88016	0.605176	0.493232	470.678	757.713	thymidylate synthetase
NSMCE4A	-0.264401	0.171082	0	0	NSMCE4A_1311	pool12	1.32439	0.0561192	3.29638	0.620682	983.531	1812.32	NSE4 homolog A, SMC5-SMC6 complex component
IFI16	-0.240408	0.333482	0	1	IFI16_1198	pool11	1.32328	-0.619694	5.42824	-0.838698	2479.22	2162.03	interferon, gamma-inducible protein 16
CDK9	-0.322758	0.120159	0	1	CDK9_1685	pool12	1.32245	-0.672281	0.55583	4.0838	174.435	218.765	cyclin-dependent kinase 9
PRPF19	-0.730487	-0.0606805	1	0	PRPF19_806	pool13	1.31843	0.381114	-2.02913	5.60332	524.86	316.843	pre-mRNA processing factor 19
SPRED2	-0.438899	0.69702	1	0	SPRED2_914	pool13	1.31804	-0.38692	1.11726	3.22378	70.3481	268.399	sprouty-related, EVH1 domain containing 2
MAEL	-0.09442	0.982967	0	1	MAEL_1447	pool13	1.31653	0.342728	-2.38476	5.99161	1110.59	917.83	maelstrom spermatogenic transposon silencer
CETN2	-0.153663	0.544242	1	0	CETN2_77	pool11	1.31369	3.94106	0	0	0	4.78651	centrin 2
SMC4	-0.090444	1.3279	0	1	SMC4_1099	pool11	1.31359	3.55776	-0.0120502	0.395063	2335.9	3443.56	structural maintenance of chromosomes 4
CDKN1A	-0.0305375	0.999566	0	2	CDKN1A_1984	pool11	1.31025	1.0449	3.40917	-0.52332	1280.68	1824.7	cyclin-dependent kinase inhibitor 1A (p21, Cip1)
PGAP2	-0.20128	0.430626	0	0	PGAP2_1414	pool12	1.30914	1.17608	1.94191	0.809415	244.475	565.49	post-GPI attachment to proteins 2
SETX	-0.236647	0.152551	0	0	SETX_115	pool12	1.30806	-1.29807	2.98708	2.23518	537.162	904.931	senataxin
ERCC3	-0.305307	0.341035	1	0	ERCC3_1653	pool13	1.30632	0.421798	3.32048	0.176699	28.6713	37.6166	excision repair cross-complementation group 3
MLH1	-0.303032	0.0592346	1	0	MLH1_1212	pool11	1.30436	1.64088	5.64297	-3.37077	166.603	407.449	mutL homolog 1
XRCC2	-0.519993	-0.0679831	0	0	XRCC2_1751	pool12	1.30372	-1.22035	6.14346	-1.01193	828.661	558.263	X-ray repair complementing defective repair in Chinese hamster cells 2
BCL2	-0.118102	0.882066	0	0	BCL2_183	pool13	1.30098	0.998809	2.33238	0.57175	122.286	300.004	B-cell CLL/lymphoma 2
PAPD7	-2.12494	0.29388	0	0	PAPD7_2384	pool13	1.3	0.882735	-4.18219	7.19946	193.664	385.692	PAP associated domain containing 7
NONO	-0.0937727	0.453828	0	2	NONO_682	pool11	1.29759	4.90283	0.416066	-1.42613	1.18978	10.0866	non-POU domain containing, octamer-binding
POLR2F	-0.327717	-0.0323116	0	1	POLR2F_182	pool12	1.29679	-0.723223	-1.55374	6.16734	812.383	531.987	polymerase (RNA) II (DNA directed) polypeptide F
AXIN2	-0.125344	0.680686	1	0	AXIN2_559	pool13	1.29629	1.42451	0.741706	1.72265	35.4776	85.556	axin 2
ZAK	-0.248336	0.109914	0	0	ZAK_1120	pool12	1.29563	1.0748	-2.21553	5.02762	550.03	605.432
SMARCAD1	-0.527682	-0.237321	1	0	SMARCAD1_1337	pool12	1.29557	-0.965127	-0.133042	4.98489	351.166	292.097	SWI/SNF-related, matrix-associated actin-dependent regulator of chromatin, subfamily a, containing DEAD/H box 1
MORF4L2	-0.229811	0.24382	0	1	MORF4L2_1207	pool12	1.29548	-0.291814	-2.07015	6.24839	696.453	428.296	mortality factor 4 like 2
UBE2B	-1.47625	0.463694	1	0	UBE2B_1021	pool13	1.29044	-0.782581	5.83549	-1.18159	313.858	230.039	ubiquitin conjugating enzyme E2B
RBX1	-1.31515	-0.81673	2	0	RBX1_881	pool13	1.29038	0.727722	2.62542	0.517993	589.803	1391.23	ring-box 1, E3 ubiquitin protein ligase
FBXW7	-1.23136	-0.149721	2	0	FBXW7_511	pool13	1.28594	-0.427123	-0.391535	4.67649	608.635	721.389	F-box and WD repeat domain containing 7
C10orf90	-0.571217	0.804931	1	0	C10orf90_1489	pool13	1.28542	1.18525	-3.02524	5.69625	313.078	312.732	chromosome 10 open reading frame 90
PSMD1	-0.171791	0.466609	0	1	PSMD1_3128	pool13	1.28524	-0.503775	-0.430579	4.79007	196.837	180.544	proteasome 26S subunit, non-ATPase 1
PSME1	-0.196884	0.256333	1	1	PSME1_135	pool11	1.28485	4.68937	0.192661	-1.02749	574.326	471.532	proteasome activator subunit 1
RAD21L1	-2.72125	-0.792366	1	0	RAD21L1_1012	pool13	1.28407	-0.28295	0.243184	3.89199	535.976	816.17	RAD21 cohesin complex component like 1
UBA52	-0.222646	0.142125	0	1	UBA52_465	pool11	1.28273	6.83444	-3.24388	0.257625	1166.92	355.102	ubiquitin A-52 residue ribosomal protein fusion product 1
IFI16	-0.240408	0.333482	0	1	IFI16_307	pool11	1.27794	1.89866	0.502847	1.43233	2585.15	5513.79	interferon, gamma-inducible protein 16
TLK1	-0.594483	-0.00252624	1	0	TLK1_2899	pool13	1.27672	1.63323	-0.0521143	2.24905	591.846	902.899	tousled like kinase 1
FBXO6	-0.198734	0.519562	0	0	FBXO6_453	pool13	1.2752	-0.0981317	5.20428	-1.28054	242.243	465.64	F-box protein 6
SNAI1	-0.978811	0.0719628	1	0	SNAI1_772	pool13	1.27449	-0.22508	4.10907	-0.0605261	167.151	161.249	snail family zinc finger 1
POLR2C	-1.451	-0.517555	2	0	POLR2C_1705	pool13	1.27301	0.980584	1.42954	1.40891	222.864	537.462	polymerase (RNA) II (DNA directed) polypeptide C, 33kDa
PSMC3	-0.225994	1.17005	0	1	PSMC3_1541	pool13	1.26765	0.569086	2.79039	0.443479	63.0978	203.37	proteasome 26S subunit, ATPase 3
TNP1	-0.229811	0.634138	0	0	TNP1_229	pool13	1.26706	0.388776	4.04196	-0.629563	260.768	297.274	transition protein 1
WRN	-0.30777	0.00974997	1	0	WRN_1645	pool11	1.26634	-2.74352	5.54786	0.994668	4154.92	1838.28	Werner syndrome RecQ like helicase
NACC2	-2.18046	0.00983881	1	0	NACC2_2017	pool13	1.26568	1.16786	-1.6984	4.32758	203.942	148.009	NACC family member 2
SETD8	-0.256725	0.214101	0	0	SETD8_925	pool12	1.26431	-0.743405	-0.698806	5.23515	734.919	529.184
TRIM32	-1.45346	0.209012	2	0	TRIM32_1303	pool13	1.26361	2.54469	5.31823	-4.07209	261.038	192.64	tripartite motif containing 32
TTC5	-0.850165	-0.0418185	1	0	TTC5_251	pool13	1.26094	-2.55888	6.00796	0.333746	381.314	375.373	tetratricopeptide repeat domain 5
PSME3	-0.605373	0.300769	1	0	PSME3_527	pool13	1.26006	0.198902	4.16322	-0.581937	64.0926	134.938	proteasome activator subunit 3
EPHA2	-0.00935041	1.36452	0	1	EPHA2_3362	pool11	1.25831	-2.54477	-0.118655	6.43835	89.319	673.376	EPH receptor A2
ACTL6A	-0.0386738	0.442493	0	0	ACTL6A_234	pool11	1.25821	-2.57757	1.98928	4.36294	1191.98	690.968	actin like 6A
ERCC5	-0.224026	0.17744	0	2	ERCC5_1160	pool12	1.25816	-0.438966	0.0656841	4.14776	755.216	782.302	excision repair cross-complementation group 5
SFN	-0.952336	0.0544329	2	0	SFN_1234	pool13	1.257	-0.43373	-0.578583	4.78331	148.809	124.788	stratifin
GADD45A	-0.166917	0.713095	1	0	GADD45A_791	pool11	1.25564	2.48821	0.286813	0.991889	6073.1	12111.7	growth arrest and DNA damage inducible alpha
TNP1	-0.229811	0.634138	0	0	TNP1_110	pool13	1.25439	0.0948963	1.73735	1.93094	683.19	1285.46	transition protein 1
CXCL12	-0.0597824	1.51286	0	0	CXCL12_278	pool13	1.25084	-2.50571	0	6.25823	25.5545	35.5663	chemokine (C-X-C motif) ligand 12
PSMD9	-0.111091	0.859492	1	0	PSMD9_716	pool11	1.24857	-1.94794	5.9006	-0.206943	1768.13	1031.69	proteasome 26S subunit, non-ATPase 9
UBR5	-0.0106392	0.795609	0	2	UBR5_9802	pool11	1.24714	-7.68959	5.95418	5.47685	2724.64	209.82	ubiquitin protein ligase E3 component n-recognin 5
TAF1	-0.297311	1.1549	0	0	TAF1_2816	pool13	1.24573	1.14108	2.63234	-0.0362237	336.78	893.447	TATA-box binding protein associated factor 1
DCLRE1A	-4	-1.29328	2	0	DCLRE1A_1865	pool13	1.24362	1.38506	0.548648	1.79714	31.3263	91.5242	DNA cross-link repair 1A
SPRED1	-3.09691	0.46572	0	0	SPRED1_5564	pool13	1.24078	-0.22134	4.43998	-0.496309	858.936	880.069	sprouty-related, EVH1 domain containing 1
PSMC5	-0.140082	0.487983	0	0	PSMC5_75	pool13	1.24051	-1.24695	0	4.96849	5.71095	12.3162	proteasome 26S subunit, ATPase 5
CUL4B	-0.094906	0.413638	0	0	CUL4B_3525	pool11	1.23893	3.9964	-0.0373073	-0.242317	923.48	1278.97	cullin 4B
PSME3	-0.605373	0.300769	1	0	PSME3_668	pool13	1.23676	1.36576	0.313991	2.03054	269.291	614.365	proteasome activator subunit 3
SHFM1	-0.267606	0.369776	1	1	SHFM1_345	pool11	1.23555	1.44978	3.3816	-1.12472	1324.4	1677.59	split hand/foot malformation (ectrodactyly) type 1
USP1	-0.0369681	0.775208	0	0	USP1_3154	pool11	1.23385	2.74795	1.57063	-0.617014	1564.41	2054.76	ubiquitin specific peptidase 1
HMGA2	-0.267928	0.785686	1	0	HMGA2_19	pool13	1.23204	0.741472	1.38135	1.57331	142.585	314.653	high mobility group AT-hook 2
GTSE1	-0.147154	0.54546	1	1	GTSE1_2799	pool11	1.23066	7.41033	1.26525	-4.98358	597.926	403.577	G2 and S-phase expressed 1
FANCF	-0.0013484	0.783043	0	2	FANCF_3077	pool11	1.22905	1.9661	1.08871	0.632351	1135.58	2396.13	Fanconi anemia complementation group F
EGFR	-0.0366845	1.01592	1	0	EGFR_754	pool11	1.22885	3.76587	-0.244286	0.16497	18.9298	24.0649	epidermal growth factor receptor
TFPT	-0.392652	0.0859214	1	0	TFPT_180	pool13	1.22871	-0.98583	-0.730914	5.40287	195.294	138.56	TCF3 (E2A) fusion partner (in childhood Leukemia)
FEN1	-0.171405	0.263683	0	1	FEN1_779	pool12	1.22826	-0.00537023	-1.80427	5.49442	511.391	292.863	flap structure-specific endonuclease 1
BRCA2	-0.227458	0.012736	1	0	BRCA2_2554	pool11	1.22583	2.99546	2.34064	-1.65861	1815.86	1473.88	breast cancer 2
CHCHD6	-1.26841	1.23359	2	0	CHCHD6_486	pool13	1.22574	0.5819	3.82477	-0.729441	9.14652	16.6877	coiled-coil-helix-coiled-coil-helix domain containing 6
ERCC4	-0.137451	0.310425	0	1	ERCC4_1377	pool12	1.22501	-0.66234	6.11199	-1.77461	799.714	466.47	excision repair cross-complementation group 4
CCND1	-0.347174	-0.0440718	1	0	CCND1_3671	pool11	1.22248	-1.82521	5.60807	-0.115406	1338.71	804.267	cyclin D1
CDK2	-0.140082	0.591082	0	3	CDK2_1425	pool11	1.22205	8.432	-3.15018	-1.61567	611.735	325.216	cyclin-dependent kinase 2
CTLA4	-0.423313	0.288361	0	1	CTLA4_918	pool13	1.22187	-0.270252	5.47428	-1.53842	368.184	287.715	cytotoxic T-lymphocyte associated protein 4
PSEN1	-0.356844	0.288868	1	0	PSEN1_2864	pool13	1.22073	1.08018	-0.549846	3.13187	161.156	434.798	presenilin 1
UBE2T	-1.29499	0.278107	1	0	UBE2T_234	pool13	1.21723	0.274936	2.61494	0.761801	328.518	700.959	ubiquitin conjugating enzyme E2T
TIMELESS	-0.273517	0.194092	0	1	TIMELESS_4501	pool11	1.21715	6.41219	-6.78868	4.02795	2349.84	1004.25	timeless circadian clock
APEX2	-0.147398	0.650722	1	2	APEX2_1888	pool11	1.21697	-2.10863	5.75302	0.0065174	2348.35	1347.85	APEX nuclease (apurinic/apyrimidinic endonuclease) 2
RBBP5	-1.31515	1.3363	0	0	RBBP5_2405	pool12	1.21543	0.401801	-2.92057	6.16504	1055.22	523.258	retinoblastoma binding protein 5
HUS1	-0.22439	0.0921589	0	1	HUS1_457	pool12	1.21408	-0.48824	-2.24053	6.371	2137.36	1149.44	HUS1 checkpoint clamp component
RPS27A	-0.609065	0.237096	0	0	RPS27A_477	pool12	1.21223	0.30318	0.769518	2.56398	522.764	737.821	ribosomal protein S27a
FANCG	-0.39545	0.157204	1	0	FANCG_2443	pool11	1.21077	0.648407	3.47792	-0.494013	279.848	566.146	Fanconi anemia complementation group G
SHPRH	-0.653843	-0.0328734	3	0	SHPRH_5261	pool13	1.21038	1.02735	-0.493862	3.09766	66.3731	220.073	SNF2 histone linker PHD RING helicase, E3 ubiquitin protein ligase
MRPS9	-0.31078	0.46382	1	0	MRPS9_294	pool13	1.20446	-1.49275	5.47242	-0.366294	564.235	532.873	mitochondrial ribosomal protein S9
PSMD3	-0.278107	0.352226	0	0	PSMD3_489	pool12	1.20424	-2.25244	6.46	-0.594855	719.498	509.834	proteasome 26S subunit, non-ATPase 3
TMEM109	-0.247337	0.339419	0	0	TMEM109_1807	pool12	1.20146	3.09079	1.07631	-0.562732	32.6362	131.846	transmembrane protein 109
RNF8	-0.485054	0.953505	0	0	RNF8_1978	pool13	1.19524	-1.29986	4.27183	0.613743	238.377	612.741	ring finger protein 8, E3 ubiquitin protein ligase
CHD1L	-0.133417	0.659953	0	1	CHD1L_1184	pool11	1.19475	0.0142392	6.10348	-2.53346	469.188	488.346	chromodomain helicase DNA binding protein 1-like
NSMCE2	-0.45892	-0.00528701	0	0	NSMCE2_467	pool12	1.19231	-0.506148	-1.84574	5.92883	400.718	312.126	NSE2/MMS21 homolog, SMC5-SMC6 complex SUMO ligase
AATF	-0.274987	0.477947	1	3	AATF_1835	pool11	1.19197	1.30601	3.7301	-1.46021	459.93	532.395	apoptosis antagonizing transcription factor
SFRP2	-0.381847	0.182104	1	0	SFRP2_1618	pool13	1.19144	-1.48759	-1.27817	6.34009	1485.9	1246.91	secreted frizzled-related protein 2
RHNO1	-1.3279	-0.435097	0	0	RHNO1_1197	pool12	1.1908	0.690977	-0.724393	3.60582	3176.21	3861.65	RAD9-HUS1-RAD1 interacting nuclear orphan 1
AXIN2	-0.125344	0.680686	1	0	AXIN2_2573	pool13	1.18967	-0.760717	1.79591	2.53383	289.766	391.549	axin 2
ASTE1	-0.0715529	0.743282	0	1	ASTE1_2308	pool11	1.18963	-0.258821	1.15727	2.67045	2737.68	4825.01	asteroid homolog 1 (Drosophila)
MAPKAPK2	-0.328457	-0.0345631	0	0	MAPKAPK2_440	pool12	1.18506	0.106898	-1.80937	5.25765	649.172	382.529	mitogen-activated protein kinase-activated protein kinase 2
APTX	-0.205582	0.318307	0	0	APTX_879	pool12	1.18191	0.630604	2.59499	0.320143	138.467	272.208	aprataxin
MYC	-0.0639389	1.29243	0	2	MYC_1715	pool11	1.17992	1.14735	3.63513	-1.24273	238.243	243.229	v-myc avian myelocytomatosis viral oncogene homolog
XRCC2	-0.519993	-0.0679831	0	0	XRCC2_1789	pool12	1.17965	0.0238986	4.84851	-1.33348	185.612	116.519	X-ray repair complementing defective repair in Chinese hamster cells 2
KDM1A	-0.500176	0.124244	1	0	KDM1A_1587	pool12	1.17858	-0.475799	-2.54324	6.55478	1459.04	860.019	lysine demethylase 1A
GTF2H2	-0.774432	0.0581905	0	0	GTF2H2_939	pool12	1.17827	-0.157029	-0.0606553	3.7525	736.369	1089.03	general transcription factor IIH subunit 2
TRIM28	-0.0146184	0.443818	0	1	TRIM28_2591	pool11	1.17677	4.26521	-0.149294	-0.585594	2190.58	2943.71	tripartite motif containing 28
MSH3	-0.194363	0.193074	0	1	MSH3_2782	pool12	1.17258	-0.481116	-2.20005	6.19892	1657.36	1002.59	mutS homolog 3
ERCC1	-0.0214543	1.33819	0	4	ERCC1_123	pool11	1.17217	1.97423	3.49327	-1.95099	1900.34	3007.32	excision repair cross-complementation group 1
C12orf48	-0.274987	0.0204516	1	0	C12orf48_1308	pool12	1.17136	-0.578334	-1.60106	5.69349	491.549	294.59
FGF10	-0.297742	0.43368	0	1	FGF10_504	pool13	1.17075	1.31819	4.71956	-2.52551	448.746	221.514	fibroblast growth factor 10
USP1	-0.0369681	0.775208	0	0	USP1_1065	pool11	1.16873	3.64467	-0.818718	0.680233	958.39	1392.19	ubiquitin specific peptidase 1
RAD9B	-0.609949	0.0587868	0	0	RAD9B_1607	pool12	1.16736	-0.0519318	-3.31945	6.87348	243.454	309.908	RAD9 checkpoint clamp component B
PNKP	-0.266482	0.0272882	0	0	PNKP_521	pool12	1.16431	-0.48723	0.0994746	3.88068	9.24001	11.1481	polynucleotide kinase 3'-phosphatase
DNA2	-1.65365	-0.011129	0	0	DNA2_2559	pool13	1.16016	0.21597	0.705629	2.55887	444.447	856.646	DNA replication helicase/nuclease 2
BCL2	-0.118102	0.882066	0	0	BCL2_219	pool13	1.15966	0.914709	1.46314	1.10112	426.451	957.7	B-cell CLL/lymphoma 2
FMN2	-1.44129	0.269783	2	0	FMN2_4123	pool13	1.15494	0.258114	1.05173	2.15498	929.319	1848.25	formin 2
GTF2H4	-0.12384	0.815309	0	1	GTF2H4_1012	pool11	1.15352	1.81274	0.499037	1.14879	98.7533	295.104	general transcription factor IIH subunit 4
MSH2	-0.518128	0.190171	0	0	MSH2_2797	pool13	1.15119	0.176627	-3.21516	6.49211	396.965	379.862	mutS homolog 2
RECQL	-0.0297926	0.743042	0	1	RECQL_2333	pool11	1.14964	2.49381	0.149172	0.805926	625.29	1081.64	RecQ like helicase
USP3	-0.0540393	0.741602	0	2	USP3_559	pool11	1.1486	3.78212	-1.08979	0.753461	875.572	835.92	ubiquitin specific peptidase 3
CLSPN	-0.463442	0.150888	1	1	CLSPN_2516	pool13	1.14828	4.31146	0.0722147	-0.938852	252.275	352.321	claspin
EGFR	-0.0366845	1.01592	1	0	EGFR_1418	pool11	1.14766	4.34323	-1.04458	0.144318	371.183	430.181	epidermal growth factor receptor
PMS1	-0.333201	0.0336236	0	0	PMS1_504	pool12	1.14631	3.31835	-3.84817	3.96875	643.834	179.658	PMS1 homolog 1, mismatch repair system component
POLD2	-0.00296329	1.1549	0	1	POLD2_860	pool11	1.14474	7.47391	-3.01765	-1.02203	839.252	215.638	polymerase (DNA directed), delta 2, accessory subunit
UPF1	-0.352421	-0.0854453	1	0	UPF1_3716	pool12	1.14082	-0.421994	-1.4759	5.32035	589.232	386.004	UPF1 regulator of nonsense transcripts homolog (yeast)
PSMD9	-0.111091	0.859492	1	0	PSMD9_1064	pool11	1.14015	2.35823	-2.37574	3.43796	279.975	285.223	proteasome 26S subunit, non-ATPase 9
CEP63	-0.574955	0.121823	0	0	CEP63_1246	pool13	1.13915	1.39924	2.69451	-0.676314	546.516	707.848	centrosomal protein 63kDa
CETN2	-0.153663	0.544242	1	0	CETN2_241	pool11	1.13774	3.09364	0.657639	-0.33807	1462.59	2306.57	centrin 2
TYMS	-0.197295	0.287266	1	0	TYMS_1359	pool11	1.13759	1.96198	0.976866	0.47393	389.877	864.005	thymidylate synthetase
CASP3	-0.0876185	0.691222	0	2	CASP3_2116	pool11	1.13713	0.578238	4.14116	-1.30802	3251.96	3099.13	caspase 3
EID3	-0.627272	0.218963	1	0	EID3_964	pool13	1.13583	0.545884	0.124676	2.73692	430.958	751.07	EP300 interacting inhibitor of differentiation 3
NTHL1	-0.966576	0.789681	0	0	NTHL1_1030	pool13	1.13569	0.983947	2.07454	0.34858	229.042	400.728	nth-like DNA glycosylase 1
ZBTB32	-0.609065	0.086557	1	0	ZBTB32_1886	pool13	1.1335	1.72223	0.450951	1.22731	199.478	426.016	zinc finger and BTB domain containing 32
FANCB	-2.37675	-0.738024	2	0	FANCB_2400	pool13	1.13249	0.767408	3.12339	-0.493325	624.869	930.338	Fanconi anemia complementation group B
BATF	-0.854804	-0.0619809	0	0	BATF_839	pool13	1.13125	1.76649	1.88479	-0.257537	35.8909	57.9469	basic leucine zipper transcription factor, ATF-like
RAD54B	-0.291154	0.313811	0	1	RAD54B_1088	pool12	1.12732	0.709874	1.75995	0.912143	526.907	1116.87	RAD54 homolog B (S. cerevisiae)
PSME3	-0.605373	0.300769	1	0	PSME3_906	pool13	1.12053	-1.43802	-0.627922	5.42755	935.323	665.751	proteasome activator subunit 3
RAD52	-1.07058	-0.523748	3	0	RAD52_1971	pool12	1.11771	0.340166	-0.73542	3.74838	3105.07	3649.32	RAD52 homolog, DNA repair protein
ATAD5	-0.105795	0.420674	0	2	ATAD5_2583	pool12	1.11698	-1.04937	-1.46327	5.86357	973.67	543.585	ATPase family, AAA domain containing 5
TYMS	-0.197295	0.287266	1	0	TYMS_606	pool11	1.11509	-0.167412	-0.987734	4.50041	116.601	114.033	thymidylate synthetase
SETMAR	-1.39254	0.620513	0	0	SETMAR_876	pool13	1.11147	-0.00535633	2.04037	1.29941	204.374	400.652	SET domain and mariner transposase fusion gene
FEN1	-0.171405	0.263683	0	1	FEN1_1749	pool12	1.11144	-0.401271	-0.214479	3.95007	559.709	482.284	flap structure-specific endonuclease 1
ATMIN	-0.539102	0.0578927	0	0	ATMIN_3171	pool13	1.11048	-0.84789	5.48056	-1.30123	473.201	316.932	ATM interactor
FAN1	-1.73049	0.79915	0	0	FAN1_1392	pool13	1.10992	0.668	-2.24735	4.9091	228.92	185.528	FANCD2/FANCI-associated nuclease 1
ZBTB32	-0.609065	0.086557	1	0	ZBTB32_157	pool13	1.10899	0.541037	-0.0678254	2.85375	719.477	1064.4	zinc finger and BTB domain containing 32
PSMD7	-0.569441	-0.0791986	1	1	PSMD7_1628	pool12	1.1074	-0.181499	5.97314	-2.46944	2181.01	1126.72	proteasome 26S subunit, non-ATPase 7
RPA4	-0.169027	0.285419	0	2	RPA4_533	pool12	1.10593	-1.28735	-0.992916	5.59806	1219.93	631.724	replication protein A4
PRPF19	-0.730487	-0.0606805	1	0	PRPF19_1604	pool13	1.10356	7.45775	3.47198	-7.61906	148.118	81.0199	pre-mRNA processing factor 19
FOXO4	-0.643401	0.0972902	2	0	FOXO4_989	pool13	1.0962	1.56556	1.63396	0.0890673	32.0201	78.9071	forkhead box O4
POLR2L	-0.0713482	0.467118	0	2	POLR2L_371	pool12	1.09543	-0.450227	-2.66245	6.39898	1725.11	888.026	polymerase (RNA) II (DNA directed) polypeptide L, 7.6kDa
HMGA1	-0.479779	0.160208	1	0	HMGA1_1312	pool13	1.09498	-0.551092	0.366893	3.46915	320.202	410.904	high mobility group AT-hook 1
NIPBL	-0.439735	0.792366	2	0	NIPBL_3501	pool11	1.094	5.78633	4.70486	-7.20919	60.361	114.545	Nipped-B homolog (Drosophila)
PSMB5	-0.458795	0.0728864	0	0	PSMB5_113	pool13	1.08961	-1.59211	-1.29333	6.15426	562.437	373.622	proteasome subunit beta 5
PARP2	-0.418847	0.152427	1	0	PARP2_1765	pool13	1.08928	3.53503	-3.08774	2.82054	50.3089	262.627	poly(ADP-ribose) polymerase 2
MAEL	-0.09442	0.982967	0	1	MAEL_645	pool13	1.08825	-0.341266	1.26132	2.34469	241.704	466.317	maelstrom spermatogenic transposon silencer
C11orf30	-0.191249	1.63264	0	0	C11orf30_5471	pool13	1.0835	0.171973	3.9728	-0.894268	530.363	814.562
SPATA18	-0.143573	1.39254	1	1	SPATA18_688	pool13	1.08338	0.804583	0.274153	2.17142	99.817	182.647	spermatogenesis associated 18
RPS27L	-0.040577	1.01682	0	0	RPS27L_1041	pool11	1.08261	1.93416	0.298316	1.01534	2029.41	3907.36	ribosomal protein S27 like
MDC1	-0.00833099	0.785686	0	2	MDC1_3228	pool12	1.08249	-0.601405	6.26577	-2.41691	825.569	404.27	mediator of DNA damage checkpoint 1
SSRP1	-0.280337	0.956638	1	0	SSRP1_2143	pool11	1.08085	1.50479	-0.772781	2.51053	204.342	462.88	structure specific recognition protein 1
MICA	-0.560509	0.296107	1	0	MICA_535	pool11	1.0806	0.750555	0.592244	1.89901	507.604	1099.93	MHC class I polypeptide-related sequence A
ERCC3	-0.305307	0.341035	1	0	ERCC3_2040	pool13	1.07916	1.09171	3.2668	-1.12102	116.963	171.548	excision repair cross-complementation group 3
TMEM109	-0.247337	0.339419	0	0	TMEM109_1428	pool12	1.07888	-1.20789	4.83156	-0.387025	112.931	59.9302	transmembrane protein 109
RFWD2	-0.237772	0.100672	0	0	RFWD2_2268	pool12	1.07795	-0.132443	1.6413	1.72499	748.139	1208.69	ring finger and WD repeat domain 2, E3 ubiquitin protein ligase
PSMC2	-0.38405	0.296193	0	0	PSMC2_348	pool13	1.07784	-0.751909	3.02324	0.962181	219.646	246.143	proteasome 26S subunit, ATPase 2
PTTG1	-0.224317	0.272866	0	1	PTTG1_19	pool11	1.0777	1.30153	3.3534	-1.42183	1992.27	2382.85	pituitary tumor-transforming 1
AXIN2	-0.125344	0.680686	1	0	AXIN2_3494	pool13	1.07766	0.789269	1.06759	1.37613	155.486	321.512	axin 2
POLL	-0.274578	0.249646	1	0	POLL_1556	pool13	1.0747	-1.76296	6.08849	-1.10143	680.396	459.357	polymerase (DNA directed), lambda
MIF	-0.268653	0.0142593	0	0	MIF_378	pool11	1.07364	1.47008	3.93507	-2.18424	1376.2	1204.54	macrophage migration inhibitory factor (glycosylation-inhibiting factor)
GADD45A	-0.166917	0.713095	1	0	GADD45A_792	pool11	1.07224	1.29187	2.03301	-0.108166	735.812	1327.28	growth arrest and DNA damage inducible alpha
RAD9B	-0.609949	0.0587868	0	0	RAD9B_1124	pool12	1.06796	0.820597	3.00193	-0.618657	400.306	602.732	RAD9 checkpoint clamp component B
SETMAR	-1.39254	0.620513	0	0	SETMAR_286	pool13	1.06581	0.931208	2.35877	-0.0925405	95.646	204.405	SET domain and mariner transposase fusion gene
GTF2H2C	-0.682354	0.0887358	0	0	GTF2H2C_942	pool13	1.06579	-0.088558	-0.644164	3.93009	768.484	997.297	GTF2H2 family member C
CXCL12	-0.0597824	1.51286	0	0	CXCL12_222	pool13	1.06018	0.351666	0.970671	1.8582	303.41	577.811	chemokine (C-X-C motif) ligand 12
PALB2	-0.0608303	1.15366	0	0	PALB2_2840	pool11	1.053	1.60522	0	1.55379	0.0995009	1.62882	partner and localizer of BRCA2
XRCC3	-0.190373	0.323855	1	2	XRCC3_359	pool12	1.05021	0.3157	2.28808	0.546837	690.334	1233.52	X-ray repair complementing defective repair in Chinese hamster cells 3
SPATA18	-0.143573	1.39254	1	1	SPATA18_2426	pool13	1.04856	0.647519	1.05953	1.43862	443.741	949.236	spermatogenesis associated 18
FBXO6	-0.198734	0.519562	0	0	FBXO6_1025	pool13	1.04759	-3.87738	2.26819	4.75197	50.3768	46.3781	F-box protein 6
RPS3	-0.321482	1.08831	2	2	RPS3_36	pool11	1.04689	7.68235	-1.77705	-2.76463	744.896	309.302	ribosomal protein S3
PRKCG	-0.403183	0.24849	2	0	PRKCG_789	pool13	1.0465	-1.48075	4.39547	0.22477	80.1622	84.1848	protein kinase C gamma
PSMA3	-0.437469	-0.120044	2	1	PSMA3_648	pool12	1.04426	-0.79619	-1.20405	5.13302	833.872	520.862	proteasome subunit alpha 3
PSMD13	-0.1673	2.27572	0	0	PSMD13_649	pool11	1.04335	-2.90122	5.91099	0.120276	4821.73	1414.1	proteasome 26S subunit, non-ATPase 13
TP53BP1	-0.688458	0.139004	0	1	TP53BP1_5912	pool12	1.0432	-2.61184	-0.903403	6.64485	460.621	479.107	tumor protein p53 binding protein 1
BTG2	-0.217527	0.169475	0	1	BTG2_2574	pool12	1.04087	-0.592862	-2.1555	5.87097	836.812	482.174	BTG family member 2
NBN	-0.333108	0.115375	2	1	NBN_4019	pool11	1.04049	-0.514086	1.45995	2.17562	335.677	540.692	nibrin
USP16	-0.408713	-0.0320778	1	1	USP16_1110	pool12	1.03929	-0.717978	2.15748	1.67835	517.871	713.557	ubiquitin specific peptidase 16
RAD51L1	-0.145148	0.229516	0	0	RAD51L1_1025	pool12	1.03893	0.0700673	-3.12546	6.17219	768.718	399.377
SMYD2	-0.692504	0.150212	1	0	SMYD2_205	pool13	1.03761	1.47039	2.37903	-0.736596	326.741	621.113	SET and MYND domain containing 2
DCLRE1B	-0.113453	0.50404	0	1	DCLRE1B_2281	pool11	1.03754	-1.92325	5.72089	-0.685039	164.316	149.699	DNA cross-link repair 1B
POLN	-0.24382	0.826522	0	0	POLN_54	pool13	1.03544	1.03564	0.857717	1.21298	262.779	530.405	polymerase (DNA directed) nu
POLR2C	-1.451	-0.517555	2	0	POLR2C_121	pool13	1.03509	1.67239	1.23404	0.198847	75.2275	136.735	polymerase (RNA) II (DNA directed) polypeptide C, 33kDa
PMS1	-0.333201	0.0336236	0	0	PMS1_2377	pool12	1.03475	-0.0330966	-3.67977	6.81711	402.778	296.328	PMS1 homolog 1, mismatch repair system component
SMYD2	-0.692504	0.150212	1	0	SMYD2_706	pool13	1.03447	0.33196	2.976	-0.204539	176.414	298.615	SET and MYND domain containing 2
PPP1R15A	-2.07572	-0.100508	2	0	PPP1R15A_872	pool13	1.03249	2.0392	0.364395	0.693877	213.439	445.347	protein phosphatase 1 regulatory subunit 15A
BBC3	-0.615109	0.232621	0	0	BBC3_971	pool13	1.03132	-0.273294	5.63463	-2.26737	408.367	344.879	BCL2 binding component 3
YY1	-0.309804	0.379968	0	0	YY1_2278	pool13	1.02986	-0.274871	3.94886	-0.584415	1300.22	1751.28	YY1 transcription factor
NCOA6	-2.72125	-1.58004	1	0	NCOA6_4629	pool12	1.02981	0.76608	1.20865	1.1147	491.697	1021.83	nuclear receptor coactivator 6
CHD1L	-0.133417	0.659953	0	1	CHD1L_2972	pool11	1.02946	1.32026	0.747235	1.02087	227.602	470.779	chromodomain helicase DNA binding protein 1-like
RPS27A	-0.609065	0.237096	0	0	RPS27A_282	pool12	1.02884	1.1493	0.809152	1.12807	866.763	1798.45	ribosomal protein S27a
RAD51AP1	-0.314348	0.508919	1	0	RAD51AP1_835	pool11	1.02839	2.67774	1.37371	-0.966272	452.26	816.039	RAD51 associated protein 1
SNW1	-1.36251	-2.24413	2	0	SNW1_293	pool12	1.02746	-1.13765	0.807349	3.41268	244.514	191.986	SNW domain containing 1
ATMIN	-0.539102	0.0578927	0	0	ATMIN_3517	pool13	1.02452	-3.30604	5.09547	1.28413	325.099	119.359	ATM interactor
CIDEB	-0.615467	0.621784	0	0	CIDEB_1832	pool13	1.02369	1.34374	-1.29644	3.02377	24.7134	56.0813	cell death-inducing DFFA-like effector b
INO80B	-1.07007	-0.0793029	2	0	INO80B_213	pool13	1.02325	0.90341	0.787056	1.37929	169.249	356.408	INO80 complex subunit B
TAF9	-0.937794	0.146241	1	0	TAF9_495	pool13	1.02198	0.334522	1.67592	1.05549	390.445	757.571	TATA-box binding protein associated factor 9
SMG1	-0.33208	0.210349	0	0	SMG1_16041	pool12	1.02068	0.402281	1.35577	1.304	313.729	631.679	SMG1 phosphatidylinositol 3-kinase-related kinase
BCL6	-0.0973445	0.928486	1	2	BCL6_2708	pool11	1.0157	1.99704	-1.63145	2.6815	405.614	632.909	B-cell CLL/lymphoma 6
RAD21	-0.185886	1.0575	0	0	RAD21_2202	pool13	1.01473	0.524471	1.87908	0.640653	924.021	1898.46	RAD21 cohesin complex component
PRMT6	-0.466101	-0.0156527	0	0	PRMT6_2524	pool12	1.01036	-0.638159	-1.48422	5.15347	430.145	239.386	protein arginine methyltransferase 6
ZBTB32	-0.609065	0.086557	1	0	ZBTB32_27	pool13	1.00921	-1.14008	1.25826	2.90944	118.425	256.971	zinc finger and BTB domain containing 32
ACTR8	-0.95546	-0.160333	0	0	ACTR8_526	pool12	1.00879	-4.14247	4.09273	3.07611	87.3198	14.3704	ARP8 actin-related protein 8 homolog (yeast)
RUVBL1	-0.209433	0.426085	1	2	RUVBL1_487	pool11	1.00827	1.33843	5.72773	-4.04135	1174.52	585.917	RuvB like AAA ATPase 1
PSMA3	-0.437469	-0.120044	2	1	PSMA3_733	pool12	1.00593	0.334779	-3.42897	6.11198	1188.12	604.008	proteasome subunit alpha 3
PCNA	-0.219107	0.263285	1	0	PCNA_339	pool11	1.00543	2.03624	0.806939	0.17312	532.547	1059.63	proliferating cell nuclear antigen
NUDT1	-0.198528	0.427128	1	1	NUDT1_605	pool11	1.00486	1.89388	1.21595	-0.0952346	2410.08	3997.79	nudix hydrolase 1
CSNK1D	-0.0332015	0.441772	0	2	CSNK1D_2535	pool11	1.00466	1.28116	-0.509118	2.24194	233.925	342.221	casein kinase 1 delta
FBXO6	-0.198734	0.519562	0	0	FBXO6_1187	pool13	1.00349	0.502468	1.20722	1.30078	455.256	917.386	F-box protein 6
POLD3	-0.316503	0.0316572	0	0	POLD3_307	pool11	1.00232	-1.01108	5.60995	-1.59192	1093	687.883	polymerase (DNA-directed), delta 3, accessory subunit
GTF2H1	-0.161592	0.234928	0	2	GTF2H1_1039	pool12	1.0023	-0.236991	3.62366	-0.37978	402.817	579.301	general transcription factor IIH subunit 1
NTHL1	-0.966576	0.789681	0	0	NTHL1_572	pool13	1.00108	2.44763	-1.68583	2.24144	326.975	276.78	nth-like DNA glycosylase 1
NFATC2	-0.574466	-0.631341	0	0	NFATC2_1207	pool12	0.999426	-2.28027	-1.71426	6.99281	1229.68	697.995	nuclear factor of activated T-cells, cytoplasmic, calcineurin-dependent 2
ATMIN	-0.539102	0.0578927	0	0	ATMIN_2124	pool13	0.99572	-1.53273	5.81376	-1.29387	14.4084	32.6854	ATM interactor
PSMC5	-0.140082	0.487983	0	0	PSMC5_849	pool13	0.994649	-1.50811	0.275727	4.21633	21.1906	13.1669	proteasome 26S subunit, ATPase 5
POLB	-0.593971	0.335358	0	0	POLB_589	pool13	0.99443	-0.4724	1.92334	1.53235	1444.97	2328.26	polymerase (DNA directed), beta
RPA1	0	1.38828	1	2	RPA1_1652	pool11	0.994067	3.38431	-0.402109	0	0.107146	3.14729	replication protein A1
SUPT16H	-0.564793	0.484656	1	1	SUPT16H_3356	pool13	0.993307	-0.39446	3.07116	0.303217	337.209	510.32	SPT16 homolog, facilitates chromatin remodeling subunit
RFWD3	-0.0903905	1.56067	0	2	RFWD3_1828	pool11	0.991875	2.05647	-6.57513	7.49428	76.2586	215.894	ring finger and WD repeat domain 3
STUB1	-2.30103	0.00802121	2	0	STUB1_722	pool13	0.990809	-0.237667	2.18266	1.02743	104.7	134.115	STIP1 homology and U-box containing protein 1, E3 ubiquitin protein ligase
TP53	-0.249569	0.462811	0	0	TP53_325	pool11	0.9891	0.412155	-0.606523	3.16167	771.54	781.689	tumor protein p53
CUL4A	-0.0962591	0.616364	0	1	CUL4A_1959	pool11	0.988597	2.49781	-0.287842	0.75582	547.157	925.342	cullin 4A
XPC	-1.03858	0.022688	0	1	XPC_3440	pool12	0.986602	0.429171	0.183156	2.34748	731.333	1262.09	xeroderma pigmentosum, complementation group C
NHEJ1	-0.321391	0.139004	1	0	NHEJ1_2055	pool13	0.986112	2.04499	-0.884582	1.79793	490.924	530.688	non-homologous end joining factor 1
PARP9	-0.349401	0.215739	0	1	PARP9_1731	pool12	0.985083	1.05721	1.2504	0.647635	326.018	608.819	poly(ADP-ribose) polymerase family member 9
PAPD7	-2.12494	0.29388	0	0	PAPD7_2114	pool13	0.983312	-0.974106	5.56762	-1.64357	1120.56	619.389	PAP associated domain containing 7
MAPKAPK2	-0.328457	-0.0345631	0	0	MAPKAPK2_2991	pool12	0.982367	0.212762	6.32099	-3.58665	978.661	663.966	mitogen-activated protein kinase-activated protein kinase 2
PSMD2	-0.0897492	0.471083	0	1	PSMD2_1924	pool12	0.982334	0.316596	3.01743	-0.387025	115.2	234.318	proteasome 26S subunit, non-ATPase 2
EP300	-0.262728	0.238222	0	1	EP300_4862	pool12	0.982301	-0.181583	0.199622	2.92886	5428.95	7942.7	E1A binding protein p300
UIMC1	-0.155336	0.292345	1	2	UIMC1_1450	pool11	0.980457	5.11992	-0.865077	-1.31347	1003.58	562.158	ubiquitin interaction motif containing 1
PSMF1	-0.090337	0.857611	0	0	PSMF1_3000	pool11	0.980029	5.0961	-2.63001	0.474	2113.46	794.501	proteasome inhibitor subunit 1
PAXIP1	-0.159706	0.863279	0	1	PAXIP1_2078	pool11	0.978451	2.18718	1.12584	-0.377667	483.546	587.708	PAX interacting (with transcription-activation domain) protein 1
CUL4B	-0.094906	0.413638	0	0	CUL4B_1626	pool11	0.976311	2.77693	0.622719	-0.47072	2886.99	3506.53	cullin 4B
PYCARD	-0.244811	0.488117	0	1	PYCARD_517	pool11	0.976204	-1.58942	3.25405	1.26398	1024.41	1263.39	PYD and CARD domain containing
UBE2N	-1.73755	0.803547	0	0	UBE2N_2067	pool13	0.975989	0.801258	1.13319	0.993522	867.665	1690.66	ubiquitin conjugating enzyme E2N
GTF2H1	-0.161592	0.234928	0	2	GTF2H1_1038	pool12	0.975826	0.661528	2.78949	-0.523546	862.556	1092.16	general transcription factor IIH subunit 1
MGMT	-1.01323	0.0583892	0	0	MGMT_402	pool13	0.975553	-0.230337	-1.30274	4.45973	382.405	221.425	O-6-methylguanine-DNA methyltransferase
BLM	-1.15989	-0.430275	1	0	BLM_285	pool11	0.974749	2.59678	4.84706	-4.51959	2391.26	1217.53	Bloom syndrome RecQ like helicase
[truncated: 1,802 more rows]
