# Supplementary material for: Dianhydrogalactitol Overcomes Multiple Temozolomide Resistance Mechanisms in Glioblastoma
Source: Oxford University Press journal article supplement (doi:10.1158/1535-7163.mct-20-0319), 2021-04-12
Supplement: 15357163mct200319-sup-241905_3_supp_6926799_qfffqz.xlsx [file 15357163mct200319-sup-241905_3_supp_6926799_qfffqz.xlsx]

## Sheet: Table S5
# Supplementary Table V. shRNA screening results for the T98G treated with Val-083
Column name	Description
Symbol	Gene Symbol
sScore	Sensitizer score
RiScore	RNAi score
Gene.NoHairpins_Below10Percentile	Number of hairpins for the same gene below the 10th percentile
Gene.NoHairpins_Above90Percentile	Number of hairpins for the same gene above the 90th percentile
hairpinID	Hairpin identification number
pool	Library pool
E123_avgLog2FC	Average log2 fold change (TMZ/DMSO) of three independent experiments
E1_log2FC	log2 fold change (TMZ/DMSO) of experiment # 1
E2_log2FC	log2 fold change (TMZ/DMSO) of experiment # 2
E3_log2FC	log2 fold change (TMZ/DMSO) of experiment # 3
DMSO_avg_CPM	Average count per millions for the DMSO condition
TMZ_avgCPM	Average count per millions for the TMZ condition
Name	Gene Name
Symbol	sScore	RiScore	Gene.NoHairpins_Below1Percentile	Gene.NoHairpins_Above99Percentile	hairpinID	pool	E123_avgLog2FC	E1_log2FC	E2_log2FC	DMSO_avg_CPM	VAL_avgCPM	Name
EYA3	-0.0544822	-0.267044	1	1	EYA3_4852	pool12	7.03755	1.22723	12.8479	253.919	6119.4	EYA transcriptional coactivator and phosphatase 3
APEX2	-0.0588365	0.773916	0	2	APEX2_1143	pool11	6.75856	5.95134	7.56578	0	124.671	APEX nuclease (apurinic/apyrimidinic endonuclease) 2
FAM175A	-0.00100003	0.432974	0	2	FAM175A_1927	pool12	6.57616	1.68035	11.472	45.554	1566.89	family with sequence similarity 175 member A
POLD1	-0.0635868	0.454817	0	4	POLD1_639	pool11	6.50901	5.1797	7.83831	0	131.552	polymerase (DNA directed), delta 1, catalytic subunit
PYCARD	-0.0710412	0.130182	0	3	PYCARD_146	pool11	6.18689	1.83754	10.5362	77.9203	1021.77	PYD and CARD domain containing
TDP1	-0.00682839	-0.245422	1	1	TDP1_2318	pool12	6.10045	0.933574	11.2673	222.575	2886.5	tyrosyl-DNA phosphodiesterase 1
C12orf48	-0.175419	0.174574	0	2	C12orf48_486	pool12	6.03629	0.776037	11.2965	517.574	3398.06
NFRKB	-0.0143939	0.493766	0	2	NFRKB_3873	pool12	5.95928	2.3465	9.57207	111.327	1514.22	nuclear factor related to kappaB binding protein
SMC5	-0.0567034	1.07366	0	3	SMC5_3163	pool11	5.87139	6.59703	5.14575	6.0904	391.024	structural maintenance of chromosomes 5
RHNO1	-0.00370728	0.396423	0	2	RHNO1_1747	pool12	5.85644	0.627725	11.0852	688.336	2691.23	RAD9-HUS1-RAD1 interacting nuclear orphan 1
ING2	-0.0163286	0.532836	0	2	ING2_561	pool12	5.75595	0.135409	11.3765	549.535	3258.56	inhibitor of growth family member 2
UACA	-0.0275195	0.33762	0	1	UACA_3545	pool12	5.75156	1.29057	10.2125	426.216	1931.54	uveal autoantigen with coiled-coil domains and ankyrin repeats
MDM4	-0.0109508	0.264641	0	2	MDM4_5064	pool12	5.74204	1.06247	10.4216	129.682	956.667	MDM4, p53 regulator
PSMA5	-0.24657	-0.0180456	0	1	PSMA5_1417	pool12	5.66554	0.27343	11.0577	998.896	3867.13	proteasome subunit alpha 5
PSMB7	-0.282329	-0.0602811	0	1	PSMB7_935	pool12	5.63344	0.610872	10.656	153.076	1442.47	proteasome subunit beta 7
C9orf119	-0.0438796	0.560036	0	2	C9orf119_942	pool12	5.6324	-0.0199006	11.2847	928.295	3406.79
RFWD2	-0.041962	0.0045842	0	1	RFWD2_2268	pool12	5.62827	0.167544	11.089	840.874	4749.01	ring finger and WD repeat domain 2, E3 ubiquitin protein ligase
RHNO1	-0.00370728	0.396423	0	2	RHNO1_1197	pool12	5.62694	0.729131	10.5247	1737.84	7655.57	RAD9-HUS1-RAD1 interacting nuclear orphan 1
RIF1	-0.00502333	0.557363	0	3	RIF1_8911	pool12	5.60981	1.49987	9.71974	270.399	1815.74	replication timing regulatory factor 1
HUS1	-0.0424885	0.288952	1	3	HUS1_285	pool12	5.60595	2.42561	8.78628	24.0628	351.717	HUS1 checkpoint clamp component
GADD45G	-0.0355989	0.443818	0	1	GADD45G_1033	pool12	5.60513	0.314562	10.8957	490.454	2987.16	growth arrest and DNA damage inducible gamma
CDK7	-0.00572685	0.468904	0	2	CDK7_605	pool12	5.60187	1.10149	10.1022	313.066	1495.14	cyclin-dependent kinase 7
ING4	-0.0320778	-0.548367	0	1	ING4_1147	pool12	5.60175	1.82034	9.38315	674.258	3047.3	inhibitor of growth family member 4
ASF1A	-0.0185438	0.292515	1	2	ASF1A_2373	pool12	5.57647	-0.111611	11.2646	2838.42	9992.17	anti-silencing function 1A histone chaperone
RAD54B	-0.106294	0.291494	1	3	RAD54B_1267	pool12	5.57318	0.795855	10.3505	235.118	1060.86	RAD54 homolog B (S. cerevisiae)
SMG1	-0.0326861	0.446602	0	2	SMG1_16041	pool12	5.56895	0.914819	10.2231	231.995	1034.95	SMG1 phosphatidylinositol 3-kinase-related kinase
CDK9	-0.0521253	0.300336	1	1	CDK9_1685	pool12	5.56471	-0.00708773	11.1365	51.6157	1176.48	cyclin-dependent kinase 9
DTX3L	-0.034187	0.512862	0	2	DTX3L_1006	pool12	5.55693	-0.0688227	11.1827	563.994	4018.18	deltex 3 like, E3 ubiquitin ligase
DTX3L	-0.034187	0.512862	0	2	DTX3L_4710	pool12	5.54716	0.728657	10.3657	345.828	1890.1	deltex 3 like, E3 ubiquitin ligase
PSMB2	-0.00375109	0.402634	0	4	PSMB2_2244	pool12	5.53296	0.672411	10.3935	511.211	2492.65	proteasome subunit beta 2
PARP1	-0.0656531	0.230992	0	3	PARP1_929	pool12	5.47435	0.380371	10.5683	74.5764	855.924	poly(ADP-ribose) polymerase 1
RBM14	-0.0297926	0.325139	0	2	RBM14_1281	pool12	5.4508	-0.332034	11.2336	386.842	1510.72	RNA binding motif protein 14
CRY1	-0.0981604	-0.208801	0	1	CRY1_1038	pool11	5.41778	10.1281	0.707464	392.469	1451.16	cryptochrome circadian clock 1
MAD2L2	-0.0278435	0.496209	1	2	MAD2L2_883	pool12	5.41381	-0.282279	11.1099	187.609	1809.92	MAD2 mitotic arrest deficient-like 2 (yeast)
FEN1	-0.0198148	0.677161	0	2	FEN1_1767	pool12	5.36092	0.741064	9.98078	495.112	2339.29	flap structure-specific endonuclease 1
CINP	-0.126796	0.172437	0	2	CINP_177	pool12	5.34384	-0.0308724	10.7186	700.341	2367.81	cyclin-dependent kinase 2 interacting protein
ATRIP	-0.175094	0.185886	0	3	ATRIP_932	pool12	5.33762	2.53531	8.13993	32.145	329.28	ATR interacting protein
POLH	-0.0880438	-0.325966	1	3	POLH_7677	pool12	5.33064	0.77395	9.88732	299.106	1220.7	polymerase (DNA directed), eta
CINP	-0.126796	0.172437	0	2	CINP_231	pool12	5.31237	-0.120014	10.7448	678.233	1909.37	cyclin-dependent kinase 2 interacting protein
MLH3	-0.034422	0.0202241	0	1	MLH3_3680	pool12	5.28496	1.75894	8.81098	34.9003	343.375	mutL homolog 3
NFATC2	-0.100398	0.470698	0	1	NFATC2_1207	pool12	5.27966	-0.216066	10.7754	905.885	2529.8	nuclear factor of activated T-cells, cytoplasmic, calcineurin-dependent 2
RIF1	-0.00502333	0.557363	0	3	RIF1_3604	pool12	5.27057	0.503969	10.0372	489.785	2266.78	replication timing regulatory factor 1
C12orf48	-0.175419	0.174574	0	2	C12orf48_1399	pool12	5.26418	-0.410741	10.9391	688.52	1988.61
FANCL	-0.0739149	0.491605	1	1	FANCL_210	pool12	5.25455	0.203889	10.3052	211.304	1190.96	Fanconi anemia complementation group L
FAM175A	-0.00100003	0.432974	0	2	FAM175A_1146	pool12	5.23331	0.830633	9.63599	512.615	1705.5	family with sequence similarity 175 member A
KDM1A	-0.100344	0.114074	0	2	KDM1A_2772	pool12	5.21121	0.312931	10.1095	32.145	591.924	lysine demethylase 1A
PSMD5	-0.0298392	0.543786	0	2	PSMD5_1653	pool12	5.20297	0.703235	9.70271	361.258	1419.63	proteasome 26S subunit, non-ATPase 5
OBFC2A	-0.000304113	0.287098	0	1	OBFC2A_1020	pool12	5.19686	-0.110356	10.5041	807.679	2560.03
NDNL2	-0.170761	0.0357404	0	2	NDNL2_1200	pool12	5.1955	-0.382548	10.7735	1067.48	3439.6
RPS27A	-0.259716	-0.0225965	0	1	RPS27A_733	pool12	5.19271	0.897487	9.48792	497.015	2178.18	ribosomal protein S27a
HUWE1	-4	-1.36151	3	1	HUWE1_1377	pool13	5.1895	3.83528	6.54372	7.01049	165.894	HECT, UBA and WWE domain containing 1, E3 ubiquitin protein ligase
KIAA0415	-0.0295137	4	0	1	KIAA0415_2072	pool12	5.16981	1.50018	8.83944	122.886	577.069
FANCD2	-0.297656	-0.117134	0	1	FANCD2_1249	pool12	5.15633	1.23767	9.075	162.995	788.174	Fanconi anemia complementation group D2
PSMA6	-0.221126	0.091247	0	1	PSMA6_170	pool12	5.13908	0.0841799	10.194	156.684	751.311	proteasome subunit alpha 6
E2F7	-0.0465786	-0.11685	0	2	E2F7_288	pool12	5.10711	1.10301	9.11121	661.701	1835.38	E2F transcription factor 7
TCEA1	-0.0296531	-0.830326	1	1	TCEA1_2250	pool12	5.1009	-0.508635	10.7104	457.325	1994.3	transcription elongation factor A1
MASTL	-0.0085524	0.43086	1	2	MASTL_1230	pool12	5.07142	-0.460446	10.6033	814.41	2144.91	microtubule associated serine/threonine kinase like
EGLN3	-0.188023	-0.143694	1	2	EGLN3_2036	pool12	5.04138	0.85391	9.22885	130.798	984.044	egl-9 family hypoxia-inducible factor 3
TIMELESS	-0.291069	-0.0312836	0	1	TIMELESS_4501	pool11	4.97618	9.38853	0.563836	0.971331	486.468	timeless circadian clock
USP28	-0.208239	0.0125125	0	3	USP28_2177	pool12	4.97327	-0.297441	10.244	2469.63	5033.98	ubiquitin specific peptidase 28
MAPK12	-1.31247	-1.04721	2	1	MAPK12_812	pool13	4.97183	6.99386	2.94979	10.8952	150.772	mitogen-activated protein kinase 12
APTX	-0.0734003	-0.104191	0	1	APTX_758	pool12	4.96362	-0.787978	10.7152	275.896	999.647	aprataxin
ING2	-0.0163286	0.532836	0	2	ING2_1101	pool12	4.95353	-0.46162	10.3687	759.003	2200.63	inhibitor of growth family member 2
BTG2	-0.0447935	0.706637	0	2	BTG2_678	pool12	4.94582	0.459173	9.43248	133.12	872.265	BTG family member 2
FOXN3	-0.15789	0.169475	0	2	FOXN3_598	pool12	4.92407	0.788517	9.05962	689.819	1988.97	forkhead box N3
IKBKE	-0.0323584	-0.166152	0	2	IKBKE_476	pool11	4.9039	1.79431	8.01348	13.2487	175.889	inhibitor of kappa light polypeptide gene enhancer in B-cells, kinase epsilon
ATAD5	-0.0242007	0.395774	1	3	ATAD5_1431	pool12	4.89775	-0.538791	10.3343	130.916	1378.81	ATPase family, AAA domain containing 5
CDCA5	-0.16845	-0.341416	1	1	CDCA5_565	pool12	4.89273	0.00290298	9.78256	286.064	945.986	cell division cycle associated 5
SMARCB1	-0.341989	-0.529296	0	1	SMARCB1_442	pool12	4.8522	1.03618	8.66822	114.883	842.962	SWI/SNF related, matrix associated, actin dependent regulator of chromatin, subfamily b, member 1
USP28	-0.208239	0.0125125	0	3	USP28_3702	pool12	4.81344	0.73159	8.8953	792.579	2501	ubiquitin specific peptidase 28
RAD9B	-0.175939	0.239879	0	2	RAD9B_1124	pool12	4.78049	-1.3224	10.8834	264.507	1049.45	RAD9 checkpoint clamp component B
POLR2L	-0.0233291	0.256804	0	3	POLR2L_716	pool12	4.77188	-1.65184	11.1956	168.44	1225.45	polymerase (RNA) II (DNA directed) polypeptide L, 7.6kDa
TYMS	-0.389872	-0.114469	0	1	TYMS_606	pool11	4.77017	9.54034	0	0.224554	539.012	thymidylate synthetase
PGAP2	-0.0143939	-0.476774	0	1	PGAP2_1414	pool12	4.75883	0.587967	8.92969	429.432	1859.35	post-GPI attachment to proteins 2
ERCC5	-0.172114	-0.0499274	1	2	ERCC5_3654	pool12	4.74154	-1.14778	10.6309	414.408	2165.53	excision repair cross-complementation group 5
FANCC	-0.0584886	-0.0715529	0	1	FANCC_4379	pool12	4.73931	-0.0400584	9.51868	98.4555	462.003	Fanconi anemia complementation group C
ATAD5	-0.0242007	0.395774	1	3	ATAD5_580	pool12	4.72277	1.3372	8.10833	210.753	738.955	ATPase family, AAA domain containing 5
UPF1	-0.212115	-0.0594337	0	1	UPF1_4234	pool12	4.72043	0.785733	8.65512	599.314	1434.92	UPF1 regulator of nonsense transcripts homolog (yeast)
ASF1A	-0.0185438	0.292515	1	2	ASF1A_1326	pool12	4.71068	0.363667	9.0577	955.193	2290.89	anti-silencing function 1A histone chaperone
MSX1	-0.269218	-0.144966	0	1	MSX1_1841	pool11	4.70595	6.35926	3.05263	29.1621	302.734	msh homeobox 1
CDC14B	-0.0155177	0.284582	0	2	CDC14B_4631	pool12	4.70314	-0.0114365	9.41771	231.51	741.527	cell division cycle 14B
POLR2E	-0.0236042	0.298864	0	3	POLR2E_1244	pool12	4.67333	-0.136365	9.48303	501.451	2774.86	polymerase (RNA) II (DNA directed) polypeptide E, 25kDa
PSMA1	-0.235376	-3.39794	3	2	PSMA1_53	pool12	4.65363	1.4374	7.86987	186.389	737.481	proteasome subunit alpha 1
BCLAF1	-0.306537	-0.143452	0	1	BCLAF1_325	pool13	4.6527	10.2249	-0.919462	149.576	892.184	BCL2 associated transcription factor 1
RAD1	-0.0856568	0.24504	0	1	RAD1_556	pool12	4.63053	0.0700102	9.19105	470.315	1367.72	RAD1 checkpoint DNA exonuclease
PRMT6	-0.182567	0.079355	0	2	PRMT6_2301	pool12	4.62327	-0.628669	9.87521	606.478	1329.44	protein arginine methyltransferase 6
USP28	-0.208239	0.0125125	0	3	USP28_592	pool12	4.62184	-0.799921	10.0436	333.272	981.587	ubiquitin specific peptidase 28
TMEM109	-0.212044	-0.247644	1	2	TMEM109_1807	pool12	4.59648	0.317476	8.87549	88.6023	461.731	transmembrane protein 109
HMGB2	-0.55705	-0.322484	1	1	HMGB2_95	pool11	4.57394	0.87821	8.26968	38.0985	338.805	high mobility group box 2
CLU	-0.0866631	0.181246	0	1	CLU_1959	pool12	4.57189	0.832661	8.31112	838.185	2124.25	clusterin
TWIST1	-0.0122891	0.533577	0	2	TWIST1_770	pool12	4.55131	1.23219	7.87044	173.399	524.535	twist family bHLH transcription factor 1
CDKN2A	-0.0163286	0.784891	0	1	CDKN2A_503	pool12	4.51059	0.426759	8.59441	418.685	851.832	cyclin-dependent kinase inhibitor 2A
C19orf39	-0.141523	-0.0769115	1	1	C19orf39_1198	pool12	4.48605	0.0139934	8.95811	207.526	1076.87
PSMB3	-0.0437355	0.120102	0	1	PSMB3_76	pool11	4.48237	-0.2788	9.24355	363.927	828.49	proteasome subunit beta 3
ATRIP	-0.175094	0.185886	0	3	ATRIP_933	pool12	4.46279	1.05923	7.86635	90.9244	306.187	ATR interacting protein
PSMD2	-0.0636371	0.358129	0	1	PSMD2_2885	pool12	4.46267	2.01854	6.9068	162.378	718.936	proteasome 26S subunit, non-ATPase 2
UHRF1	-0.00572685	-0.0562582	0	2	UHRF1_3440	pool12	4.45399	0.915835	7.99214	528.11	1312.76	ubiquitin-like with PHD and ring finger domains 1
CCNA2	-0.0279824	0.0600317	0	2	CCNA2_1282	pool11	4.43146	8.86292	0	0	232.295	cyclin A2
FBXO31	-0.115148	0.0699684	0	1	FBXO31_586	pool12	4.39219	1.90885	6.87553	95.766	447.554	F-box protein 31
TRIP12	-0.0758241	-0.274415	1	1	TRIP12_3177	pool12	4.37839	-0.031602	8.78839	539.63	1298.83	thyroid hormone receptor interactor 12
MAPKAPK2	-0.0975076	0.388489	1	2	MAPKAPK2_440	pool12	4.36679	0.811205	7.92237	313.724	1332.59	mitogen-activated protein kinase-activated protein kinase 2
ALKBH8	-0.132709	0.315424	0	2	ALKBH8_618	pool12	4.35114	-1.14801	9.85028	509.308	1150.93	alkB homolog 8, tRNA methyltransferase
PHLDA3	-0.160396	0.0166895	0	2	PHLDA3_964	pool12	4.33962	1.64878	7.03045	71.0343	352.34	pleckstrin homology like domain family A member 3
BCL3	-0.0213174	-0.11025	1	2	BCL3_1796	pool12	4.33184	0.482991	8.1807	287.232	690.308	B-cell CLL/lymphoma 3
RBM14	-0.0297926	0.325139	0	2	RBM14_3650	pool12	4.3236	-0.708715	9.35592	359.434	1363.48	RNA binding motif protein 14
PARP9	-0.605723	-0.36231	0	1	PARP9_1116	pool12	4.29874	-0.504813	9.1023	221.289	704.012	poly(ADP-ribose) polymerase family member 9
MACROD1	-0.209785	-0.0271494	0	2	MACROD1_1226	pool12	4.28875	-0.874462	9.45197	133.907	422.498	MACRO domain containing 1
FEN1	-0.0198148	0.677161	0	2	FEN1_1837	pool12	4.27128	-0.572309	9.11487	164.163	663.27	flap structure-specific endonuclease 1
ACTR5	-0.0103722	0.428757	0	3	ACTR5_1037	pool12	4.26821	-0.773958	9.31037	434.732	887.477	ARP5 actin-related protein 5 homolog (yeast)
NSMCE1	-0.0664621	0.0270108	1	1	NSMCE1_490	pool12	4.24381	-0.115247	8.60286	282.234	1131.8	NSE1 homolog, SMC5-SMC6 complex component
SMC2	-0.250805	-0.635261	0	1	SMC2_2090	pool11	4.23516	7.54788	0.92244	0	93.5113	structural maintenance of chromosomes 2
KIF22	-0.22856	-0.120732	0	2	KIF22_326	pool11	4.21856	5.0075	3.42962	12.3218	153.239	kinesin family member 22
POLR2H	-0.164944	0.0160581	0	1	POLR2H_346	pool11	4.21741	0.533566	7.90125	1.00919	253.801	polymerase (RNA) II (DNA directed) polypeptide H
PSMB2	-0.00375109	0.402634	0	4	PSMB2_2637	pool12	4.19333	-0.155944	8.54261	15.2459	199.579	proteasome subunit beta 2
TREX1	-0.0404816	0.564156	0	2	TREX1_1465	pool12	4.19037	-0.0993562	8.48009	729.928	1303.62	three prime repair exonuclease 1
EME1	-0.170375	-0.128135	1	2	EME1_2134	pool12	4.17981	0.433323	7.9263	451.527	1093.12	essential meiotic structure-specific endonuclease 1
PSMA1	-0.235376	-3.39794	3	2	PSMA1_105	pool12	4.16786	0.325632	8.01008	179.842	545.914	proteasome subunit alpha 1
SMC1A	-0.118558	0.143392	0	2	SMC1A_9361	pool12	4.16145	0.47096	7.85193	293.713	522.304	structural maintenance of chromosomes 1A
RAD54B	-0.106294	0.291494	1	3	RAD54B_2926	pool12	4.15674	-0.464353	8.77783	574.163	1181.6	RAD54 homolog B (S. cerevisiae)
EEPD1	-0.0433514	-0.445511	0	1	EEPD1_1524	pool12	4.14752	0.133366	8.16167	287.901	529.679	endonuclease/exonuclease/phosphatase family domain containing 1
RNF169	-0.0339052	0.338945	0	2	RNF169_588	pool12	4.13879	-0.0431903	8.32078	271.186	502.075	ring finger protein 169
POLR2E	-0.0236042	0.298864	0	3	POLR2E_1623	pool12	4.13846	-0.570242	8.84717	787.959	989.756	polymerase (RNA) II (DNA directed) polypeptide E, 25kDa
HUS1	-0.0424885	0.288952	1	3	HUS1_2698	pool12	4.12872	0.023476	8.23395	148.799	525.86	HUS1 checkpoint clamp component
BBC3	-0.295678	-0.263524	2	2	BBC3_970	pool13	4.1242	4.94145	3.30696	110.018	1126.9	BCL2 binding component 3
C9orf119	-0.0438796	0.560036	0	2	C9orf119_664	pool12	4.11985	-0.65198	8.89168	1169.91	1336.35
TAOK1	-0.114074	-0.140802	1	1	TAOK1_11459	pool12	4.10125	-1.38545	9.58795	417.046	1311.24	TAO kinase 1
LIG3	-0.184754	-0.0290026	0	2	LIG3_1636	pool12	4.09435	0.647358	7.54135	36.1861	149.603	ligase III, DNA, ATP-dependent
ALKBH8	-0.132709	0.315424	0	2	ALKBH8_617	pool12	4.06175	-1.14569	9.26918	511.093	1154.04	alkB homolog 8, tRNA methyltransferase
XRCC1	-0.208309	-0.0716041	0	2	XRCC1_1505	pool12	4.05488	-1.51448	9.62424	111.13	432.672	X-ray repair complementing defective repair in Chinese hamster cells 1
RPA4	-0.0797201	0.106627	0	1	RPA4_720	pool12	4.04577	-0.457474	8.54901	183.318	320.142	replication protein A4
POLR2E	-0.0236042	0.298864	0	3	POLR2E_2213	pool12	4.04042	-1.46752	9.54836	118.661	416.469	polymerase (RNA) II (DNA directed) polypeptide E, 25kDa
GTF2H1	-0.0310503	-0.437113	0	2	GTF2H1_1085	pool12	4.03447	-0.173866	8.24281	1919.48	2229.22	general transcription factor IIH subunit 1
MBD4	-0.0204061	0.344958	0	2	MBD4_445	pool11	4.01012	0.18376	7.83649	49.3641	212.382	methyl-CpG binding domain 4 DNA glycosylase
POLR2L	-0.0233291	0.256804	0	3	POLR2L_371	pool12	4.00546	-0.282918	8.29384	463.584	927.812	polymerase (RNA) II (DNA directed) polypeptide L, 7.6kDa
BRIP1	-0.0295137	0.29056	0	3	BRIP1_7789	pool12	4.00341	0.289155	7.71766	1074.07	2774.78	BRCA1 interacting protein C-terminal helicase 1
ERCC5	-0.172114	-0.0499274	1	2	ERCC5_3431	pool12	4.00063	1.23285	6.7684	120.196	363.793	excision repair cross-complementation group 5
PSMB2	-0.00375109	0.402634	0	4	PSMB2_3185	pool12	3.99365	-0.960584	8.94789	844.732	1295.62	proteasome subunit beta 2
JMY	-0.283663	-0.2423	0	1	JMY_6893	pool13	3.98728	7.33543	0.639124	28.816	1249.13	junction mediating and regulatory protein, p53 cofactor
NDNL2	-0.170761	0.0357404	0	2	NDNL2_100	pool12	3.97061	-0.0983472	8.03956	139.916	392.543
SNAI2	-0.110418	0.0101054	0	2	SNAI2_489	pool11	3.92531	6.62868	1.22194	120.718	396.32	snail family zinc finger 2
TOPBP1	-0.193413	-0.00651968	0	1	TOPBP1_1953	pool12	3.91475	-0.756917	8.58642	636.786	759.818	topoisomerase (DNA) II binding protein 1
PSMA3	-0.246417	-0.00222057	0	2	PSMA3_648	pool12	3.91399	0.894645	6.93334	407.311	2950.3	proteasome subunit alpha 3
PSMA7	-0.000130308	0.462559	0	2	PSMA7_950	pool11	3.91382	6.95008	0.877546	1.42044	146.411	proteasome subunit alpha 7
CSNK1E	-0.144541	0.0710412	0	1	CSNK1E_2392	pool12	3.89793	0.747929	7.04793	529.829	1086.16	casein kinase 1 epsilon
UNG	-0.20412	-0.209082	0	1	UNG_285	pool11	3.86235	7.30066	0.424033	146.631	345.433	uracil DNA glycosylase
PARP1	-0.0656531	0.230992	0	3	PARP1_1706	pool12	3.85445	-1.78866	9.49755	527.244	693.444	poly(ADP-ribose) polymerase 1
TIPIN	-0.397289	-0.164246	1	1	TIPIN_487	pool11	3.83736	4.55696	3.11776	8.82551	178.467	TIMELESS interacting protein
MACROD1	-0.209785	-0.0271494	0	2	MACROD1_546	pool12	3.81899	-0.251299	7.88927	103.612	381.832	MACRO domain containing 1
PLK1	-0.0237418	-0.00568285	0	1	PLK1_837	pool11	3.81886	7.17302	0.464701	0.186694	72.1023	polo like kinase 1
NUDT1	-0.211337	-0.101001	0	2	NUDT1_597	pool11	3.81641	7.55683	0.0759826	0.186694	93.87	nudix hydrolase 1
ABL1	-0.291154	-0.50515	0	1	ABL1_1726	pool11	3.7819	-0.224868	7.78866	8.64403	240.747	ABL proto-oncogene 1, non-receptor tyrosine kinase
PRMT6	-0.182567	0.079355	0	2	PRMT6_2125	pool12	3.74488	-0.922775	8.41253	147.5	247.439	protein arginine methyltransferase 6
BCL3	-0.0213174	-0.11025	1	2	BCL3_1792	pool12	3.74177	0.66059	6.82296	371.111	670.877	B-cell CLL/lymphoma 3
CDK7	-0.00572685	0.468904	0	2	CDK7_381	pool12	3.69047	0.794313	6.58662	58.6094	220.202	cyclin-dependent kinase 7
ALKBH3	-0.0401957	0.552532	1	2	ALKBH3_597	pool12	3.68031	-1.56984	8.93047	175.919	545.664	alkB homolog 3, alpha-ketoglutarate-dependent dioxygenase
WRNIP1	-0.0544822	1.06651	0	2	WRNIP1_1229	pool12	3.64186	-0.156629	7.44035	170.277	239.051	Werner helicase interacting protein 1
POLR2L	-0.0233291	0.256804	0	3	POLR2L_710	pool12	3.6335	-0.366338	7.63334	65.9431	149.817	polymerase (RNA) II (DNA directed) polypeptide L, 7.6kDa
MCRS1	-0.0348924	-1.1152	2	1	MCRS1_1160	pool12	3.59552	-1.03125	8.22229	110.028	202.403	microspherule protein 1
RAD54B	-0.106294	0.291494	1	3	RAD54B_1088	pool12	3.59337	-2.55172	9.73845	324.52	907.68	RAD54 homolog B (S. cerevisiae)
CDC14B	-0.0155177	0.284582	0	2	CDC14B_4213	pool12	3.59141	0.83628	6.34654	466.444	893.245	cell division cycle 14B
RAD51L1	-0.099469	-0.881074	2	1	RAD51L1_1025	pool12	3.58214	-1.33933	8.50362	122.702	229.164
ATM	-0.00493547	-0.522011	1	1	ATM_4713	pool12	3.54823	-0.67405	7.77052	864.268	976.082	ATM serine/threonine kinase
TOPORS	-0.00397017	0.32744	0	1	TOPORS_1583	pool12	3.51605	-1.00393	8.03604	177.506	284.358	topoisomerase I binding, arginine/serine-rich, E3 ubiquitin protein ligase
CCND1	-0.180522	-0.076238	1	2	CCND1_2467	pool11	3.49834	6.99669	0	0	63.3532	cyclin D1
NEIL1	-0.0794593	-0.522156	1	2	NEIL1_1756	pool13	3.48824	1.53873	5.43776	16.8273	197.85	nei like DNA glycosylase 1
APLF	-0.295249	-0.106405	0	1	APLF_325	pool12	3.4843	1.16784	5.80076	110.71	303.428	aprataxin and PNKP like factor
C17orf70	-0.0842309	-0.244278	0	1	C17orf70_2850	pool12	3.48292	6.55283	0.413003	3.49003	374.271
ACTR5	-0.0103722	0.428757	0	3	ACTR5_1038	pool12	3.47606	0.131545	6.82058	259.364	340.188	ARP5 actin-related protein 5 homolog (yeast)
CCNO	-4	-0.70708	2	1	CCNO_1393	pool13	3.46286	4.04933	2.8764	103.831	1118.62	cyclin O
ATRIP	-0.175094	0.185886	0	3	ATRIP_658	pool12	3.44815	-0.972387	7.86869	183.2	267.674	ATR interacting protein
SPDYA	-0.165897	-0.218963	0	1	SPDYA_58	pool12	3.44754	-0.489155	7.38424	714.485	674.92	speedy/RINGO cell cycle regulator family member A
RAD9B	-0.175939	0.239879	0	2	RAD9B_1610	pool12	3.44585	0.0331166	6.85859	455.45	724.442	RAD9 checkpoint clamp component B
RBM38	-0.15422	0.304431	0	1	RBM38_1266	pool11	3.42691	0.0993621	6.75446	332.674	2245.95	RNA binding motif protein 38
MASTL	-0.0085524	0.43086	1	2	MASTL_1360	pool12	3.40609	-3.29615	10.1083	368.986	1965.39	microtubule associated serine/threonine kinase like
PSMB2	-0.00375109	0.402634	0	4	PSMB2_4106	pool12	3.4008	-0.742498	7.5441	255.087	337.913	proteasome subunit beta 2
CLSPN	-0.0455645	-0.0318908	0	1	CLSPN_2677	pool13	3.40011	4.18083	2.6194	27.4062	298.361	claspin
EGLN3	-0.188023	-0.143694	1	2	EGLN3_1318	pool12	3.39606	-0.216055	7.00818	761.736	1517.11	egl-9 family hypoxia-inducible factor 3
CCND1	-0.180522	-0.076238	1	2	CCND1_4247	pool11	3.39523	3.34408	3.44638	64.4329	704.368	cyclin D1
HINFP	-4	-0.697453	2	1	HINFP_2090	pool13	3.38986	3.83221	2.94752	104.149	1108.62	histone H4 transcription factor
DYRK2	-0.219035	-0.0952304	1	2	DYRK2_1335	pool12	3.3625	-3.43303	10.158	97.6029	864.375	dual specificity tyrosine phosphorylation regulated kinase 2
PARP4	-0.347174	-0.182038	1	1	PARP4_1887	pool11	3.36111	6.72222	0	1.12277	170.835	poly(ADP-ribose) polymerase family member 4
PSMB10	-0.203634	0.0143041	0	1	PSMB10_740	pool12	3.34554	-1.91074	8.60182	61.2331	306.537	proteasome subunit beta 10
MCM8	-0.220548	-8.68676e-05	0	1	MCM8_3408	pool12	3.33143	-1.88356	8.54643	268.392	818.072	minichromosome maintenance 8 homologous recombination repair factor
UHRF1	-0.00572685	-0.0562582	0	2	UHRF1_3624	pool12	3.32813	-0.141167	6.79744	800.231	1358.72	ubiquitin-like with PHD and ring finger domains 1
PSMD5	-0.0298392	0.543786	0	2	PSMD5_2705	pool12	3.31183	-0.997585	7.62124	77.5153	136.518	proteasome 26S subunit, non-ATPase 5
ACTR5	-0.0103722	0.428757	0	3	ACTR5_625	pool12	3.30384	0.129252	6.47844	132.621	189.181	ARP5 actin-related protein 5 homolog (yeast)
KIF22	-0.22856	-0.120732	0	2	KIF22_1177	pool11	3.29764	0.253151	6.34212	107.11	257.355	kinesin family member 22
IRF3	-0.0085524	0.125055	1	1	IRF3_79	pool12	3.28006	0.0615965	6.49853	234.698	334.261	interferon regulatory factor 3
INTS7	-0.185486	-0.0230085	0	1	INTS7_4096	pool12	3.27932	-0.981231	7.53988	939.264	753.286	integrator complex subunit 7
SIRT6	-0.289544	-0.679646	1	1	SIRT6_1289	pool12	3.25195	0.38411	6.11979	321.823	2071.68	sirtuin 6
MUTYH	-0.0190427	-0.883392	1	1	MUTYH_358	pool11	3.23177	-0.166365	6.6299	0.224554	49.1643	mutY DNA glycosylase
CUL4A	-0.0528114	0.513286	0	1	CUL4A_1838	pool11	3.23127	0.614146	5.84839	124.279	501.511	cullin 4A
PSMB5	-4	-1.23657	3	1	PSMB5_209	pool13	3.22623	9.97245	-3.52	7.42854	502.008	proteasome subunit beta 5
PSMB9	-0.0898026	-0.0155627	1	1	PSMB9_919	pool11	3.20907	0.98198	5.43616	304.591	4904.71	proteasome subunit beta 9
PARP3	-0.301986	-0.288699	0	1	PARP3_937	pool11	3.20075	5.41162	0.989887	55.08	221.79	poly(ADP-ribose) polymerase family member 3
NFRKB	-0.0143939	0.493766	0	2	NFRKB_980	pool12	3.17876	0.299289	6.05822	393.638	1610.6	nuclear factor related to kappaB binding protein
PARP1	-0.0656531	0.230992	0	3	PARP1_2999	pool12	3.15661	-1.26627	7.5795	263.287	251.918	poly(ADP-ribose) polymerase 1
RFC5	-0.347077	-0.15391	0	1	RFC5_1719	pool11	3.15388	-0.618707	6.92647	180.301	990.73	replication factor C subunit 5
PMS1	-0.255942	-0.25189	0	1	PMS1_717	pool12	3.1487	-0.269435	6.56684	40.2272	80.1899	PMS1 homolog 1, mismatch repair system component
MCL1	-0.137094	-0.0408155	0	1	MCL1_3284	pool11	3.14453	1.14805	5.14101	137.873	3033.64	myeloid cell leukemia 1
DDIT4	-0.00182788	0.164309	0	2	DDIT4_161	pool11	3.14277	0.701656	5.58389	423.184	3454.43	DNA damage inducible transcript 4
VAV3	-0.0357404	0.73189	0	1	VAV3_2225	pool12	3.11818	-2.75738	8.99374	241.547	289.688	vav guanine nucleotide exchange factor 3
MRPS26	-0.15658	-0.0535477	0	1	MRPS26_959	pool12	3.10055	-0.983737	7.18483	508.206	401.33	mitochondrial ribosomal protein S26
BCCIP	-0.452595	-0.380176	0	1	BCCIP_296	pool11	3.09749	6.19498	0	0.449108	69.0331	BRCA2 and CDKN1A interacting protein
RPA1	-0.25602	-0.452471	1	1	RPA1_2033	pool11	3.0547	1.11444	4.99496	0	16.0268	replication protein A1
CASP9	-0.180588	0.141162	0	1	CASP9_128	pool12	3.01469	-1.23577	7.26514	1685.68	5384.4	caspase 9
PNKP	-0.119015	-0.730721	1	1	PNKP_744	pool12	2.99748	-2.54393	8.53889	139.483	301.717	polynucleotide kinase 3'-phosphatase
SMC5	-0.0567034	1.07366	0	3	SMC5_2846	pool11	2.99398	1.97213	4.01584	124.902	1418.71	structural maintenance of chromosomes 5
C1orf124	-0.0437835	0.107015	0	1	C1orf124_589	pool12	2.97333	-1.32956	7.27622	293.963	232.242
POLD1	-0.0635868	0.454817	0	4	POLD1_2226	pool11	2.97227	5.94453	0	0	30.293	polymerase (DNA directed), delta 1, catalytic subunit
MAD2L2	-0.0278435	0.496209	1	2	MAD2L2_490	pool12	2.96064	0.631548	5.28973	159.99	267.194	MAD2 mitotic arrest deficient-like 2 (yeast)
EPHA2	-0.0268259	0.0695604	0	1	EPHA2_3362	pool11	2.91477	5.45251	0.377032	2.0941	81.5121	EPH receptor A2
BCL2	-0.438899	-0.341989	0	1	BCL2_530	pool13	2.91273	7.81511	-1.98965	1.48571	112.104	B-cell CLL/lymphoma 2
KDM1A	-0.100344	0.114074	0	2	KDM1A_904	pool12	2.90732	-1.94934	7.76398	586.941	313.957	lysine demethylase 1A
PYCARD	-0.0710412	0.130182	0	3	PYCARD_147	pool11	2.9033	9.67551	-3.86891	16.6158	409.045	PYD and CARD domain containing
CHD1L	-0.121536	-0.344862	1	1	CHD1L_1600	pool11	2.89769	-0.428026	6.22341	32.2979	74.5486	chromodomain helicase DNA binding protein 1-like
POLG	-0.3083	-0.570248	0	2	POLG_3757	pool13	2.82789	1.47488	4.18089	19.9626	222.131	polymerase (DNA directed), gamma
LIG3	-0.184754	-0.0290026	0	2	LIG3_2404	pool12	2.81368	-0.0607647	5.68813	121.433	356.288	ligase III, DNA, ATP-dependent
SMC6	-0.372942	-0.19942	0	1	SMC6_3466	pool11	2.77832	5.55665	0	2.69465	149.863	structural maintenance of chromosomes 6
ZSWIM7	-0.364215	-1.86967	1	1	ZSWIM7_1816	pool13	2.77481	3.05343	2.49619	40.8416	296.292	zinc finger SWIM-type containing 7
UIMC1	-0.0734003	-0.286846	0	1	UIMC1_1465	pool11	2.76016	-1.2973	6.81762	194.575	197.723	ubiquitin interaction motif containing 1
POLD1	-0.0635868	0.454817	0	4	POLD1_349	pool11	2.6905	0.934466	4.44652	175.491	973.898	polymerase (DNA directed), delta 1, catalytic subunit
TMEM109	-0.212044	-0.247644	1	2	TMEM109_71	pool12	2.67268	-2.70278	8.04814	3.00477	197.878	transmembrane protein 109
BRIP1	-0.0295137	0.29056	0	3	BRIP1_2011	pool12	2.61529	0.844732	4.38584	423.894	781.171	BRCA1 interacting protein C-terminal helicase 1
NEIL1	-0.0794593	-0.522156	1	2	NEIL1_1496	pool13	2.58097	1.64679	3.51514	17.7419	119.397	nei like DNA glycosylase 1
PCNA	-0.0869283	0.0916759	0	1	PCNA_670	pool11	2.57599	5.42295	-0.270973	0.597942	30.8081	proliferating cell nuclear antigen
MAPK14	-0.176461	-0.289544	0	1	MAPK14_1005	pool12	2.55752	-2.35175	7.4668	123.135	155.757	mitogen-activated protein kinase 14
TAOK3	-0.494036	-0.208871	1	1	TAOK3_3060	pool13	2.54999	1.70334	3.39663	163.354	1344.89	TAO kinase 3
GEN1	-0.0394817	0.711527	0	2	GEN1_258	pool12	2.54473	-0.0805685	5.17003	174.633	200.114	GEN1, Holliday junction 5' flap endonuclease
HUS1B	-0.330683	-0.217098	2	1	HUS1B_582	pool13	2.53635	0	5.0727	1.48571	66.3268	HUS1 checkpoint clamp component B
DDIT4	-0.00182788	0.164309	0	2	DDIT4_836	pool11	2.48889	-4.02411	9.0019	7.63484	255.837	DNA damage inducible transcript 4
PML	-0.285922	-0.135311	0	1	PML_114	pool12	2.48046	0.310725	4.65019	745.43	4331.17	promyelocytic leukemia
USP16	-0.104301	-0.10785	0	1	USP16_1386	pool12	2.45923	0.247048	4.67142	625.439	1227.37	ubiquitin specific peptidase 16
YY1	-0.257353	-0.178618	1	1	YY1_2278	pool13	2.45475	9.00106	-4.09156	455.002	558.777	YY1 transcription factor
PSMD14	-0.498256	-0.351445	1	1	PSMD14_977	pool12	2.41833	0.219988	4.61667	151.908	188.78	proteasome 26S subunit, non-ATPase 14
BTG2	-0.0447935	0.706637	0	2	BTG2_2574	pool12	2.41633	0.0679284	4.76473	202.422	225.297	BTG family member 2
IER3	-0.183427	0.0629839	0	1	IER3_931	pool12	2.40714	1.03987	3.77442	179.069	1370.09	immediate early response 3
RAD52	-0.0269646	-0.209012	0	1	RAD52_461	pool12	2.37688	-0.43608	5.18984	169.673	160.876	RAD52 homolog, DNA repair protein
RRM2B	-0.195111	-0.0167798	1	2	RRM2B_3287	pool13	2.37627	2.11281	2.63973	171.682	980.113	ribonucleotide reductase regulatory TP53 inducible subunit M2B
SSRP1	-0.142788	-0.122111	0	1	SSRP1_2143	pool11	2.36096	2.42613	2.29579	252.38	1289.57	structure specific recognition protein 1
SMG1	-0.0326861	0.446602	0	2	SMG1_8964	pool12	2.35992	0.168786	4.55106	145.912	180.873	SMG1 phosphatidylinositol 3-kinase-related kinase
E2F7	-0.0465786	-0.11685	0	2	E2F7_1593	pool12	2.35948	0.336008	4.38295	825.237	1770.61	E2F transcription factor 7
DDX5	-0.0166895	0.0261336	0	1	DDX5_1038	pool12	2.35506	-0.84756	5.55768	1045.33	859.215	DEAD-box helicase 5
MYO6	-0.0397195	0.327164	0	1	MYO6_979	pool12	2.35387	0.291834	4.4159	1068.14	4219.52	myosin VI
CASP2	-0.404614	-0.350665	0	1	CASP2_2493	pool11	2.35274	2.06103	2.64446	150.117	795.26	caspase 2
MDM2	-0.248644	-0.0416751	0	1	MDM2_618	pool12	2.33821	3.04439	1.63202	1.16791	13.025	MDM2 proto-oncogene, E3 ubiquitin protein ligase
FEM1B	-0.150089	0.425159	0	3	FEM1B_1994	pool13	2.333	1.77227	2.89373	288.56	1736.6	fem-1 homolog b (C. elegans)
DCLRE1B	-0.405055	-0.272052	0	1	DCLRE1B_2281	pool11	2.32471	1.10744	3.54198	85.2394	561.747	DNA cross-link repair 1B
TREX1	-0.0404816	0.564156	0	2	TREX1_1241	pool12	2.30773	-2.05268	6.66815	349.318	184.792	three prime repair exonuclease 1
GTF2H1	-0.0310503	-0.437113	0	2	GTF2H1_3225	pool12	2.30125	-0.401726	5.00422	123.947	562.693	general transcription factor IIH subunit 1
XRCC1	-0.208309	-0.0716041	0	2	XRCC1_1947	pool12	2.2985	-3.75389	8.35089	6.24531	162.744	X-ray repair complementing defective repair in Chinese hamster cells 1
RAD18	-0.134541	-0.153168	1	2	RAD18_2112	pool12	2.29291	-3.44899	8.03482	127.544	207.257	RAD18, E3 ubiquitin protein ligase
WRNIP1	-0.0544822	1.06651	0	2	WRNIP1_2127	pool12	2.28736	1.91863	2.6561	15.0622	60.9867	Werner helicase interacting protein 1
FNIP2	-1.18575	-0.507799	2	1	FNIP2_5768	pool13	2.27862	0.614976	3.94227	298.865	2048.56	folliculin interacting protein 2
IGHMBP2	-0.254067	-0.46801	2	1	IGHMBP2_766	pool13	2.26672	3.55809	0.97536	100.513	511.061	immunoglobulin mu binding protein 2
CDKN2D	-0.125634	-0.0576942	0	1	CDKN2D_1101	pool13	2.25464	2.04147	2.46781	214.62	1042.71	cyclin-dependent kinase inhibitor 2D (p19, inhibits CDK4)
SMYD2	-0.293965	-0.0543837	0	1	SMYD2_1668	pool13	2.25014	1.07095	3.42932	625.899	3965.86	SET and MYND domain containing 2
MYC	-0.0297461	-0.164627	0	2	MYC_1742	pool11	2.22679	-5.00345	9.45703	20.3966	482.275	v-myc avian myelocytomatosis viral oncogene homolog
CCNA2	-0.0279824	0.0600317	0	2	CCNA2_1511	pool11	2.22531	3.9169	0.533722	0.449108	14.0596	cyclin A2
POLD1	-0.0635868	0.454817	0	4	POLD1_348	pool11	2.20676	3.64292	0.770604	17.0283	216.8	polymerase (DNA directed), delta 1, catalytic subunit
ZMAT3	-4	-1.52433	3	1	ZMAT3_5741	pool13	2.18683	0.529922	3.84374	158.767	1425.67	zinc finger matrin-type 3
PSMA7	-0.000130308	0.462559	0	2	PSMA7_951	pool11	2.17663	0.410197	3.94307	396.205	2239.09	proteasome subunit alpha 7
TOP2A	-0.0578431	-0.0771708	1	1	TOP2A_1196	pool11	2.14905	1.34478	2.95333	136.836	585.903	topoisomerase (DNA) II alpha
CUL4B	-0.0590853	-0.257825	0	2	CUL4B_3525	pool11	2.14033	0.682137	3.59852	326.462	1555.76	cullin 4B
FEM1B	-0.150089	0.425159	0	3	FEM1B_1012	pool13	2.13857	1.70276	2.57438	181.6	839.537	fem-1 homolog b (C. elegans)
TRIM28	-0.0420577	0.692076	0	1	TRIM28_1648	pool11	2.13734	6.09351	-1.81883	2.05363	33.8665	tripartite motif containing 28
GTF2H4	-0.186086	-0.0368736	0	1	GTF2H4_1012	pool11	2.13594	2.49931	1.77257	49.3486	195.253	general transcription factor IIH subunit 4
RPS27L	-0.0403386	0.653451	0	1	RPS27L_362	pool11	2.11728	2.98187	1.25269	152.415	540.775	ribosomal protein S27 like
CEP164	-0.316503	-1.34582	1	2	CEP164_4689	pool11	2.10999	1.98833	2.23165	458.839	2058.52	centrosomal protein 164kDa
CRIP1	-0.059633	-0.4011	0	1	CRIP1_329	pool11	2.10887	1.19938	3.01836	78.7077	368.133	cysteine rich protein 1
HMOX1	-0.286341	-0.0784176	0	1	HMOX1_693	pool11	2.09998	4.19995	0	0.224554	12.8163	heme oxygenase 1
PYCARD	-0.0710412	0.130182	0	3	PYCARD_514	pool11	2.07548	4.60869	-0.457739	10.9653	274.676	PYD and CARD domain containing
RNF8	-0.355758	-0.49147	0	1	RNF8_2005	pool13	2.06814	0.331822	3.80446	12.546	181.907	ring finger protein 8, E3 ubiquitin protein ligase
FZR1	-4	-0.912574	1	1	FZR1_3141	pool13	2.03818	1.32182	2.75455	520.061	2059.04	fizzy/cell division cycle 20 related 1
SMC1A	-0.118558	0.143392	0	2	SMC1A_6002	pool12	2.03722	0.964957	3.10948	322.198	638.223	structural maintenance of chromosomes 1A
PSMC4	-0.349692	-0.173407	1	1	PSMC4_506	pool11	2.02081	3.96563	0.0759826	12.3126	196.983	proteasome 26S subunit, ATPase 4
MIF	-0.316863	-0.143271	0	1	MIF_372	pool11	2.01238	0.678929	3.34582	320.629	3260.87	macrophage migration inhibitory factor (glycosylation-inhibiting factor)
XPC	-0.0746879	0.182765	0	1	XPC_3518	pool12	2.00943	0.0405186	3.97833	3467.15	5117.08	xeroderma pigmentosum, complementation group C
POLE	-0.105462	-0.32781	0	1	POLE_972	pool12	1.98637	3.97273	0	7.89848	131.36	polymerase (DNA directed), epsilon, catalytic subunit
PSMB6	-0.140501	-0.201004	0	1	PSMB6_544	pool12	1.95116	1.84678	2.05553	211.149	819.515	proteasome subunit beta 6
EXO1	-0.310602	-0.359519	0	1	EXO1_584	pool11	1.94911	0.998236	2.89998	378.654	1684.76	exonuclease 1
APEX2	-0.0588365	0.773916	0	2	APEX2_1887	pool11	1.94841	1.94363	1.95319	274.629	1062.99	APEX nuclease (apurinic/apyrimidinic endonuclease) 2
UBE2D3	-0.116736	-0.0180908	0	1	UBE2D3_948	pool11	1.9381	1.35885	2.51735	399.569	1723.04	ubiquitin conjugating enzyme E2D 3
PSMD8	-0.241467	-1.14086	1	1	PSMD8_1135	pool12	1.9336	0.229692	3.63752	676.095	804.212	proteasome 26S subunit, non-ATPase 8
PSMA3	-0.246417	-0.00222057	0	2	PSMA3_839	pool12	1.93304	-6.9359	10.802	73.9074	1337.69	proteasome subunit alpha 3
PHLDA3	-0.160396	0.0166895	0	2	PHLDA3_683	pool12	1.92503	-7.1039	10.954	97.6029	1486.45	pleckstrin homology like domain family A member 3
IRF7	-0.0154727	-0.223807	0	1	IRF7_1781	pool11	1.91578	0.771048	3.06052	225.857	1478.48	interferon regulatory factor 7
MORF4L2	-0.216883	-0.048177	0	1	MORF4L2_170	pool12	1.9107	-1.95581	5.77721	145.177	77.591	mortality factor 4 like 2
MBD4	-0.0204061	0.344958	0	2	MBD4_1391	pool11	1.89881	-0.609392	4.40702	229.087	451.811	methyl-CpG binding domain 4 DNA glycosylase
USP10	-0.181444	-0.370896	0	2	USP10_3101	pool13	1.89428	1.37006	2.41849	253.318	989.134	ubiquitin specific peptidase 10
NUDT1	-0.211337	-0.101001	0	2	NUDT1_576	pool11	1.88631	0.13349	3.63913	253.259	2298.77	nudix hydrolase 1
FANCM	-0.0503173	-0.16698	0	1	FANCM_5762	pool12	1.87934	-0.136272	3.89495	795.337	1040.66	Fanconi anemia complementation group M
MORF4L1	-0.294136	-0.415895	0	1	MORF4L1_610	pool13	1.87892	0.338014	3.41982	668.281	1842.16	mortality factor 4 like 1
MAEL	-0.524184	-0.880414	1	1	MAEL_27	pool13	1.87191	3.57505	0.168766	72.3371	176.278	maelstrom spermatogenic transposon silencer
HUS1	-0.0424885	0.288952	1	3	HUS1_822	pool12	1.87019	3.74039	0	13.9601	192.759	HUS1 checkpoint clamp component
TMEM161A	-4	-1.49349	2	1	TMEM161A_132	pool11	1.86924	-0.721944	4.46043	668.497	2146.28	transmembrane protein 161A
POLQ	-0.388383	-0.267687	0	1	POLQ_6648	pool11	1.86765	4.53999	-0.804695	25.0743	585.762	polymerase (DNA directed), theta
TP53	-0.226945	-0.0992506	0	1	TP53_204	pool11	1.86307	3.72615	0	0	6.11686	tumor protein p53
BCL6	-1.03716	-0.544546	0	1	BCL6_2472	pool11	1.8554	2.6072	1.1036	346.444	899.054	B-cell CLL/lymphoma 6
ATAD5	-0.0242007	0.395774	1	3	ATAD5_3282	pool12	1.84696	0.963291	2.73062	224.346	441.882	ATPase family, AAA domain containing 5
PAPD7	-0.0117087	-0.282163	1	1	PAPD7_1599	pool13	1.82412	2.2896	1.35865	818.583	2784.56	PAP associated domain containing 7
MRPS35	-0.152057	0.0736061	1	2	MRPS35_1736	pool13	1.82241	1.53321	2.11161	524.615	2089.6	mitochondrial ribosomal protein S35
POLK	-0.0439277	-0.708853	0	1	POLK_1039	pool13	1.81645	1.51684	2.11606	582.712	2040.31	polymerase (DNA directed) kappa
MDC1	-0.0009565	-0.594654	1	1	MDC1_5819	pool12	1.79866	-2.92744	6.52476	170.224	113.357	mediator of DNA damage checkpoint 1
EME1	-0.170375	-0.128135	1	2	EME1_295	pool12	1.79489	-0.69219	4.28197	174.987	1686.8	essential meiotic structure-specific endonuclease 1
BBC3	-0.295678	-0.263524	2	2	BBC3_1009	pool13	1.79107	1.31144	2.27071	146.377	506.774	BCL2 binding component 3
SETD8	-0.527097	-1.00524	1	1	SETD8_925	pool12	1.77295	-0.833277	4.37918	699.909	3792.18
ATRX	-2.10237	-0.928486	1	1	ATRX_1740	pool13	1.76256	2.43143	1.0937	380.949	1199.87	alpha thalassemia/mental retardation syndrome X-linked
SIRT1	-0.0859214	0.120216	0	1	SIRT1_944	pool13	1.75684	3.21496	0.298721	161.859	751.87	sirtuin 1
RAD18	-0.134541	-0.153168	1	2	RAD18_1392	pool12	1.75468	1.17974	2.32962	655.861	2260.69	RAD18, E3 ubiquitin protein ligase
CDK2	-0.394803	-0.196065	0	1	CDK2_387	pool11	1.72711	2.88109	0.573133	191.453	708.094	cyclin-dependent kinase 2
RNF169	-0.0339052	0.338945	0	2	RNF169_4654	pool12	1.72229	-0.718482	4.16306	387.826	248.275	ring finger protein 169
STRA13	-0.203634	-1.37779	0	1	STRA13_551	pool12	1.71184	0.520962	2.90271	125.219	367.079	stimulated by retinoic acid 13
MUC1	-0.173925	-0.199008	1	1	MUC1_376	pool12	1.69071	-0.980055	4.36147	121.6	71.1777	mucin 1, cell surface associated
LYN	-0.050854	0.453087	0	2	LYN_2593	pool11	1.68067	0.14182	3.21952	1442.89	5773.64	LYN proto-oncogene, Src family tyrosine kinase
PSMC3	-0.454569	-0.313096	1	1	PSMC3_423	pool13	1.67885	9.2404	-5.88271	40.2792	302.109	proteasome 26S subunit, ATPase 3
DYRK2	-0.219035	-0.0952304	1	2	DYRK2_4768	pool12	1.6574	0.837597	2.4772	491.524	1167.84	dual specificity tyrosine phosphorylation regulated kinase 2
TWIST1	-0.0122891	0.533577	0	2	TWIST1_1577	pool12	1.64573	-0.249974	3.54143	723.177	3216.78	twist family bHLH transcription factor 1
POLG2	-0.196543	-0.0180003	0	1	POLG2_806	pool11	1.64204	2.78524	0.498842	467.013	1406.39	polymerase (DNA directed), gamma 2, accessory subunit
GNL1	-0.0742755	0.0536951	0	1	GNL1_4666	pool13	1.64126	1.07364	2.20888	2228.55	8098.19	guanine nucleotide binding protein-like 1
MYC	-0.0297461	-0.164627	0	2	MYC_929	pool11	1.6352	3.23429	0.0361167	429.313	950.926	v-myc avian myelocytomatosis viral oncogene homolog
SMC3	-0.0968557	-0.69229	1	1	SMC3_860	pool12	1.63187	-6.57203	9.83577	57.1262	456.518	structural maintenance of chromosomes 3
PSMD4	-0.23381	-0.437113	1	1	PSMD4_359	pool13	1.63052	1.86463	1.39642	487.306	1504.04	proteasome 26S subunit, non-ATPase 4
MAPKAPK2	-0.0975076	0.388489	1	2	MAPKAPK2_1394	pool12	1.62662	0.768214	2.48503	1054.14	3211.05	mitogen-activated protein kinase-activated protein kinase 2
UBE2V2	-1.78516	-0.882729	2	1	UBE2V2_361	pool13	1.61797	1.88293	1.35301	805.184	2348.94	ubiquitin conjugating enzyme E2 variant 2
USP1	-0.122053	0.0207704	0	1	USP1_261	pool11	1.61367	3.22734	0	2.69465	29.4192	ubiquitin specific peptidase 1
TERF2IP	-0.108407	-0.0326393	0	1	TERF2IP_1605	pool13	1.59919	0.100875	3.0975	190.912	773.376	telomeric repeat binding factor 2, interacting protein
RBX1	-0.580209	-0.510886	1	1	RBX1_326	pool13	1.59645	4.08179	-0.88889	310.734	736.636	ring-box 1, E3 ubiquitin protein ligase
SESN1	-4	-2.16115	3	1	SESN1_1624	pool13	1.59578	6.29681	-3.10525	18.598	1072.87	sestrin 1
GML	-1.5157	-1.84164	1	1	GML_678	pool13	1.57835	1.39838	1.75832	624.454	1886.34	glycosylphosphatidylinositol anchored molecule like
GTF2H2C	-0.0408155	0.56607	0	1	GTF2H2C_175	pool13	1.57603	0.357218	2.79484	1028.08	2503.56	GTF2H2 family member C
GADD45A	-0.0488568	-0.60415	0	1	GADD45A_765	pool11	1.57563	1.12491	2.02634	1303.89	4234.18	growth arrest and DNA damage inducible alpha
PSMD13	-0.0800855	-0.353204	1	1	PSMD13_1428	pool11	1.57209	3.14417	0	12.1259	111.123	proteasome 26S subunit, non-ATPase 13
AP5S1	-0.0522723	-0.0881502	0	1	AP5S1_1670	pool12	1.56158	3.12315	0	10.8375	98.282	adaptor related protein complex 5 sigma 1 subunit
DDX1	-0.884389	-0.731422	2	1	DDX1_1073	pool13	1.55879	-2.98392	6.1015	131.324	49.995	DEAD/H-box helicase 1
TRIAP1	-0.126215	-0.124591	0	1	TRIAP1_472	pool11	1.55548	2.9191	0.19185	199.641	617.84	TP53 regulated inhibitor of apoptosis 1
FOXN3	-0.15789	0.169475	0	2	FOXN3_4741	pool12	1.55315	0.353399	2.75291	2037.39	6040.62	forkhead box N3
RIF1	-0.00502333	0.557363	0	3	RIF1_7806	pool12	1.55271	1.27797	1.82745	288.085	719.657	replication timing regulatory factor 1
POLH	-0.0880438	-0.325966	1	3	POLH_284	pool12	1.54702	0.203677	2.89036	465.906	546.085	polymerase (DNA directed), eta
POLG	-0.3083	-0.570248	0	2	POLG_2540	pool13	1.54366	2.49954	0.587778	517.566	1766.27	polymerase (DNA directed), gamma
LYN	-0.050854	0.453087	0	2	LYN_2266	pool11	1.5374	3.04479	0.0300095	766.787	1708.86	LYN proto-oncogene, Src family tyrosine kinase
SLX4	-0.214314	-0.261775	0	1	SLX4_1981	pool13	1.53676	0.53075	2.54278	374.869	1487.57	SLX4 structure-specific endonuclease subunit
PSMD7	-0.0518316	0.439376	0	1	PSMD7_1004	pool12	1.53488	3.06977	0	37.1045	315.242	proteasome 26S subunit, non-ATPase 7
ERCC6	-0.286425	-2.14267	2	1	ERCC6_5028	pool13	1.53197	1.41078	1.65315	1175.08	3480.47	excision repair cross-complementation group 6
POLM	-0.815593	-0.373352	1	1	POLM_2577	pool11	1.51058	0.842244	2.17891	318.74	1250.75	polymerase (DNA directed), mu
FAN1	-0.0378675	0.237997	0	1	FAN1_468	pool13	1.50993	0.188232	2.83163	236.946	1166.4	FANCD2/FANCI-associated nuclease 1
MDM4	-0.0109508	0.264641	0	2	MDM4_784	pool12	1.50987	0.625456	2.39428	998.139	2856.28	MDM4, p53 regulator
PLK3	-0.222138	-1.284	0	1	PLK3_407	pool11	1.50641	0.984038	2.02878	75.927	296.277	polo like kinase 3
TNP1	-0.487182	-0.236422	2	1	TNP1_110	pool13	1.50152	1.66283	1.34022	854.97	2373.42	transition protein 1
RFWD3	-0.2909	-0.400008	1	1	RFWD3_4622	pool11	1.50098	-0.533139	3.53511	14.2957	19.0912	ring finger and WD repeat domain 3
SOD1	-0.0736061	-0.547294	1	1	SOD1_879	pool13	1.49981	1.84888	1.15074	962.99	2848.02	superoxide dismutase 1, soluble
POLR2J	-0.0515381	0.650917	0	1	POLR2J_641	pool11	1.49652	0.98771	2.00533	351.95	1092.9	polymerase (RNA) II (DNA directed) polypeptide J, 13.3kDa
ERCC8	-0.37789	-0.147276	0	1	ERCC8_685	pool11	1.49353	-0.985092	3.97214	816.799	4196.84	excision repair cross-complementation group 8
BRIP1	-0.0295137	0.29056	0	3	BRIP1_1988	pool12	1.48859	-0.912986	3.89018	540.299	307.89	BRCA1 interacting protein C-terminal helicase 1
C19orf40	-0.168386	0.132238	0	1	C19orf40_617	pool12	1.48669	1.09719	1.8762	218.984	708.463
CHEK1	-0.0594337	0.00718148	0	2	CHEK1_1224	pool11	1.48155	0.285734	2.67736	941.538	3604.94	checkpoint kinase 1
CUL4B	-0.0590853	-0.257825	0	2	CUL4B_1441	pool11	1.47854	1.32516	1.63192	237.23	675.451	cullin 4B
ALKBH3	-0.0401957	0.552532	1	2	ALKBH3_594	pool12	1.46805	2.30234	0.633767	123.686	611.491	alkB homolog 3, alpha-ketoglutarate-dependent dioxygenase
PSMD12	-0.677781	-0.407934	1	1	PSMD12_1045	pool13	1.46625	8.21565	-5.28315	26.7729	255.431	proteasome 26S subunit, non-ATPase 12
MACROD2	-0.038484	-0.319211	0	1	MACROD2_3501	pool13	1.46152	1.4147	1.50833	825.289	2280.96	MACRO domain containing 2
CEP164	-0.316503	-1.34582	1	2	CEP164_4915	pool11	1.46079	-0.0121407	2.93373	281.355	422.588	centrosomal protein 164kDa
MRPS35	-0.152057	0.0736061	1	2	MRPS35_1514	pool13	1.46047	1.11688	1.80406	84.1869	246.231	mitochondrial ribosomal protein S35
MICA	-0.340274	-0.295678	0	1	MICA_567	pool11	1.46022	-3.95475	6.87518	75.0011	62.5649	MHC class I polypeptide-related sequence A
REV3L	-0.893129	-0.253833	0	1	REV3L_9808	pool11	1.45563	-0.0473651	2.95862	610.872	2754.63	REV3 like, DNA directed polymerase zeta catalytic subunit
GEN1	-0.0394817	0.711527	0	2	GEN1_550	pool12	1.45413	1.35243	1.55582	529.093	1429.32	GEN1, Holliday junction 5' flap endonuclease
POLH	-0.0880438	-0.325966	1	3	POLH_943	pool12	1.45357	2.49413	0.413003	27.3692	156.677	polymerase (DNA directed), eta
CDKN1A	-0.68382	-0.355857	0	1	CDKN1A_343	pool11	1.4487	0.393594	2.50381	380.048	1430.92	cyclin-dependent kinase inhibitor 1A (p21, Cip1)
PSMD3	-0.18923	-0.464453	0	1	PSMD3_1545	pool12	1.44168	0.252217	2.63114	471.587	565.619	proteasome 26S subunit, non-ATPase 3
SMC5	-0.0567034	1.07366	0	3	SMC5_1579	pool11	1.43932	0.76158	2.11705	689.835	2186.9	structural maintenance of chromosomes 5
SNAI2	-0.110418	0.0101054	0	2	SNAI2_1347	pool11	1.4369	1.6798	1.19399	214.557	525.324	snail family zinc finger 2
BATF	-0.19942	-0.270511	1	1	BATF_908	pool13	1.43416	1.50165	1.36667	789.833	2128.15	basic leucine zipper transcription factor, ATF-like
TFAP4	-1.49349	-0.209082	0	1	TFAP4_2039	pool13	1.43103	0.751987	2.11007	637.249	2252.68	transcription factor AP-4 (activating enhancer binding protein 4)
ALKBH2	-0.095555	0.164944	0	1	ALKBH2_393	pool12	1.43086	-1.05048	3.91219	765.566	1419.81	alkB homolog 2, alpha-ketoglutarate-dependent dioxygenase
DYRK1A	-0.588717	-0.516128	2	1	DYRK1A_1509	pool13	1.41795	1.09714	1.73877	598.606	1597.03	dual specificity tyrosine phosphorylation regulated kinase 1A
CHEK1	-0.0594337	0.00718148	0	2	CHEK1_185	pool11	1.4172	0.14126	2.69314	1562.84	4715.84	checkpoint kinase 1
USP10	-0.181444	-0.370896	0	2	USP10_418	pool13	1.40837	1.96341	0.85333	165.463	364.138	ubiquitin specific peptidase 10
FEM1B	-0.150089	0.425159	0	3	FEM1B_1998	pool13	1.40816	-0.0606723	2.87699	248.35	1292.53	fem-1 homolog b (C. elegans)
IKBKE	-0.0323584	-0.166152	0	2	IKBKE_480	pool11	1.40393	1.38233	1.42552	1405.26	3750.28	inhibitor of kappa light polypeptide gene enhancer in B-cells, kinase epsilon
RRM2B	-0.195111	-0.0167798	1	2	RRM2B_3234	pool13	1.40354	1.16256	1.64452	1193.63	3387.04	ribonucleotide reductase regulatory TP53 inducible subunit M2B
LRDD	-0.299642	-0.502103	0	0	LRDD_2215	pool12	1.39552	-1.44596	4.23699	253.171	401.373
RPS27L	-0.0403386	0.653451	0	1	RPS27L_289	pool11	1.37535	2.40694	0.343761	23.1487	94.1738	ribosomal protein S27 like
FBXO31	-0.115148	0.0699684	0	1	FBXO31_3139	pool12	1.36584	-2.26223	4.99391	276.159	104.194	F-box protein 31
C9orf102	-0.0548762	-0.162285	1	0	C9orf102_2108	pool13	1.35791	1.36235	1.35348	567.676	1455.92
FBXW7	-1.10403	-0.75721	0	0	FBXW7_511	pool13	1.35522	1.94379	0.76666	668.438	1576.2	F-box and WD repeat domain containing 7
NSMCE1	-0.0664621	0.0270108	1	1	NSMCE1_549	pool12	1.35153	-0.241251	2.94431	1156.55	3478.92	NSE1 homolog, SMC5-SMC6 complex component
ASCC3	-0.0653501	0.104467	0	0	ASCC3_504	pool11	1.3406	0.700639	1.98056	137.257	244.795	activating signal cointegrator 1 complex subunit 3
RAD51AP1	-0.2909	-0.253599	0	0	RAD51AP1_281	pool11	1.34047	-1.10213	3.78306	209.92	106.386	RAD51 associated protein 1
INO80D	-0.225848	-0.0773264	0	0	INO80D_4914	pool13	1.33992	-0.234923	2.91477	893.59	2830.32	INO80 complex subunit D
MNDA	-0.227019	-0.237772	0	0	MNDA_1433	pool11	1.33609	-0.815581	3.48775	77.6684	345.275	myeloid cell nuclear differentiation antigen
MCRS1	-0.0348924	-1.1152	2	1	MCRS1_345	pool12	1.33231	-1.18697	3.85159	279.517	136.192	microspherule protein 1
PAXIP1	-0.283496	-0.310514	1	0	PAXIP1_1422	pool11	1.33105	8.76971	-6.10762	33.9783	217.731	PAX interacting (with transcription-activation domain) protein 1
FANCA	-0.00722564	0.373968	0	0	FANCA_842	pool12	1.32659	2.65576	-0.00258485	150.57	948.865	Fanconi anemia complementation group A
AXIN2	-0.335358	-0.0240171	0	0	AXIN2_2573	pool13	1.32327	2.30894	0.337594	372.764	1013.13	axin 2
BAG6	-0.183427	-0.0318441	0	0	BAG6_1152	pool12	1.31286	-6.25382	8.87955	38.1545	470.002	BCL2 associated athanogene 6
MCTS1	-0.120445	-0.20294	0	0	MCTS1_4830	pool13	1.30595	1.55408	1.05781	757.36	1928.9	malignant T-cell amplified sequence 1
PSMB3	-0.0437355	0.120102	0	1	PSMB3_641	pool11	1.29988	-0.30848	2.90824	286.859	691.323	proteasome subunit beta 3
FAM175A	-0.00100003	0.432974	0	2	FAM175A_430	pool12	1.29662	-0.621877	3.21511	83.2096	58.0397	family with sequence similarity 175 member A
AATF	-0.397181	-0.962175	1	0	AATF_968	pool11	1.29332	1.44899	1.13765	499.611	1224.01	apoptosis antagonizing transcription factor
KIAA0415	-0.0295137	4	0	1	KIAA0415_2523	pool12	1.29051	2.40477	0.176239	89.7976	469.424
MAPK12	-1.31247	-1.04721	2	1	MAPK12_1170	pool13	1.28552	-0.149041	2.72008	281.723	886.78	mitogen-activated protein kinase 12
SMG1	-0.0326861	0.446602	0	2	SMG1_12438	pool12	1.28512	0.18255	2.3877	894.542	2139.04	SMG1 phosphatidylinositol 3-kinase-related kinase
APEX2	-0.0588365	0.773916	0	2	APEX2_1889	pool11	1.28194	0.636467	1.9274	1031.23	2759.5	APEX nuclease (apurinic/apyrimidinic endonuclease) 2
C16orf5	-0.160899	-0.370285	0	0	C16orf5_2330	pool13	1.28133	1.75214	0.810514	438.031	1013.56
ZBTB32	-0.442613	-1.23136	2	0	ZBTB32_157	pool13	1.27989	1.87084	0.688936	902.183	2611.52	zinc finger and BTB domain containing 32
YAP1	-0.106072	0.00828672	0	0	YAP1_4244	pool11	1.2737	0.376731	2.17066	737.871	2216.06	Yes associated protein 1
PSMA3	-0.246417	-0.00222057	0	2	PSMA3_780	pool12	1.27006	0.791021	1.74911	3701.15	8864.49	proteasome subunit alpha 3
FAN1	-0.0378675	0.237997	0	1	FAN1_1013	pool13	1.26816	0.228631	2.30769	665.247	1916.35	FANCD2/FANCI-associated nuclease 1
SP100	-0.0332483	-0.322667	0	0	SP100_887	pool11	1.26768	-0.149592	2.68496	447.889	990.697	SP100 nuclear antigen
CSNK1E	-0.144541	0.0710412	0	1	CSNK1E_694	pool12	1.2598	-7.67237	10.192	187.976	876.623	casein kinase 1 epsilon
CHD1L	-0.121536	-0.344862	1	1	CHD1L_977	pool11	1.25964	1.04866	1.47063	394.163	987.758	chromodomain helicase DNA binding protein 1-like
KIAA0415	-0.0295137	4	0	1	KIAA0415_5181	pool12	1.25762	2.10223	0.413003	12.858	57.0213
TAF9	-0.00340078	0.968996	0	0	TAF9_495	pool13	1.25393	0.317513	2.19035	159.178	438.532	TATA-box binding protein associated factor 9
INO80B	-0.432856	-0.480172	0	0	INO80B_225	pool13	1.25292	-0.82908	3.33492	231.855	679.025	INO80 complex subunit B
POLB	-0.316683	-0.288024	0	0	POLB_217	pool13	1.25045	0.918985	1.58192	2313.34	5512.64	polymerase (DNA directed), beta
FANCC	-0.0584886	-0.0715529	0	1	FANCC_2135	pool12	1.24591	0.316889	2.17492	936.259	1170.57	Fanconi anemia complementation group C
EYA3	-0.0544822	-0.267044	1	1	EYA3_3811	pool12	1.24519	3.07435	-0.583971	26.8839	228.056	EYA transcriptional coactivator and phosphatase 3
TOP2A	-0.0578431	-0.0771708	1	1	TOP2A_705	pool11	1.24507	0.0517571	2.43838	169.949	533.582	topoisomerase (DNA) II alpha
TAF9	-0.00340078	0.968996	0	0	TAF9_549	pool13	1.23261	-0.419665	2.88489	98.6693	473.563	TATA-box binding protein associated factor 9
MSH3	-0.22388	-1.79588	2	0	MSH3_3288	pool12	1.23212	-0.925439	3.38969	473.844	1915.43	mutS homolog 3
C9orf102	-0.0548762	-0.162285	1	0	C9orf102_1699	pool13	1.22973	1.38689	1.07258	805.772	1830.6
UACA	-0.0275195	0.33762	0	1	UACA_3542	pool12	1.2276	1.45927	0.995928	45.1867	125.622	uveal autoantigen with coiled-coil domains and ankyrin repeats
GTF2H2C	-0.0408155	0.56607	0	1	GTF2H2C_173	pool13	1.22646	0.81324	1.63968	359.716	757.331	GTF2H2 family member C
POLR2D	-0.0399099	0.742561	0	0	POLR2D_899	pool11	1.20907	0.52586	1.89228	2453.57	6185.34	polymerase (RNA) II (DNA directed) polypeptide D
BLM	-0.00121773	0.927383	0	0	BLM_1332	pool11	1.20858	0.0885428	2.32862	554.535	1931.29	Bloom syndrome RecQ like helicase
PSME1	-0.350568	-0.26544	1	0	PSME1_300	pool11	1.20739	1.30279	1.112	912.758	2088.59	proteasome activator subunit 1
XAB2	-0.234108	-0.118159	0	0	XAB2_1905	pool12	1.20628	1.77879	0.633767	182.466	627.131	XPA binding protein 2
UBE2T	-0.475085	-1.22841	1	0	UBE2T_279	pool13	1.20505	0.346766	2.06333	229.391	618.414	ubiquitin conjugating enzyme E2T
MCRS1	-0.0348924	-1.1152	2	1	MCRS1_134	pool12	1.20495	2.4099	0	5.87794	33.3947	microspherule protein 1
C11orf30	-4	-0.74642	2	0	C11orf30_1372	pool13	1.20124	0.516893	1.88559	415.09	1054.86
INO80D	-0.225848	-0.0773264	0	0	INO80D_13168	pool13	1.19917	0.799703	1.59863	95.5303	250.802	INO80 complex subunit D
ATM	-0.00493547	-0.522011	1	1	ATM_924	pool12	1.19452	-7.30384	9.69287	145.295	413.746	ATM serine/threonine kinase
CASP9	-0.180588	0.141162	0	1	CASP9_1048	pool12	1.19236	0.0811835	2.30353	3234.35	9582.92	caspase 9
XPA	-0.491874	-0.297914	2	0	XPA_826	pool13	1.18546	8.54053	-6.1696	35.4919	185.676	xeroderma pigmentosum, complementation group A
DDX5	-0.0166895	0.0261336	0	1	DDX5_1034	pool12	1.18329	-2.78337	5.14995	152.591	56.6327	DEAD-box helicase 5
RAD54L	-0.289883	-0.224244	0	0	RAD54L_1563	pool11	1.18056	1.22431	1.13681	114.345	257.956	RAD54-like (S. cerevisiae)
CD44	-0.495257	-0.446238	0	0	CD44_246	pool11	1.17264	1.84115	0.504141	84.4953	153.906	CD44 molecule (Indian blood group)
PSMD13	-0.0800855	-0.353204	1	1	PSMD13_425	pool11	1.1631	6.74643	-4.42023	21.3615	222.402	proteasome 26S subunit, non-ATPase 13
YY1	-0.257353	-0.178618	1	1	YY1_2451	pool13	1.15846	-0.414858	2.73178	372.837	1937.98	YY1 transcription factor
MCM9	-0.976336	-0.368861	0	0	MCM9_299	pool11	1.15629	1.07508	1.2375	79.0052	167.731	minichromosome maintenance 9 homologous recombination repair factor
HIPK2	-0.414539	-0.305395	1	0	HIPK2_11626	pool13	1.15357	9.56955	-7.2624	76.4465	516.299	homeodomain interacting protein kinase 2
UBE2B	-0.34911	-0.214599	0	0	UBE2B_1977	pool13	1.14322	-0.528916	2.81535	750.331	2499.65	ubiquitin conjugating enzyme E2B
VAV3	-0.0357404	0.73189	0	1	VAV3_733	pool12	1.14295	-0.766819	3.05272	42.7467	32.4125	vav guanine nucleotide exchange factor 3
MEIR5	-0.196953	0.0134522	0	0	MEIR5_551	pool13	1.14152	-0.0583163	2.34137	1612.29	4720.32
EPHA2	-0.0268259	0.0695604	0	1	EPHA2_1952	pool11	1.14053	2.25251	0.028555	18.8221	86.6877	EPH receptor A2
SP100	-0.0332483	-0.322667	0	0	SP100_414	pool11	1.13879	0.198476	2.07911	455.728	778.619	SP100 nuclear antigen
UBE2N	-0.080765	0.17192	0	0	UBE2N_615	pool13	1.13681	1.07601	1.19761	750.009	1670.78	ubiquitin conjugating enzyme E2N
RNF168	-0.295078	-0.257511	1	0	RNF168_2528	pool13	1.13582	1.19708	1.07455	1340.28	2949.59	ring finger protein 168, E3 ubiquitin protein ligase
ZFYVE26	-0.219683	-0.292685	1	0	ZFYVE26_9195	pool11	1.13509	1.24732	1.02285	1.98313	5.84706	zinc finger FYVE-type containing 26
GTF2H2	-0.0456127	0.820448	0	0	GTF2H2_172	pool12	1.1336	0.395161	1.87203	1063.09	2181.3	general transcription factor IIH subunit 2
PSMD2	-0.0636371	0.358129	0	1	PSMD2_792	pool12	1.1332	1.85339	0.413003	18.7359	69.1745	proteasome 26S subunit, non-ATPase 2
NDRG1	-1.06298	-0.250341	0	0	NDRG1_1479	pool13	1.13217	0.757349	1.50699	1723.87	3846.36	N-myc downstream regulated 1
MRPS35	-0.152057	0.0736061	1	2	MRPS35_848	pool13	1.12451	0.214257	2.03476	665.032	2265.2	mitochondrial ribosomal protein S35
TERF2	-0.473531	-0.37872	2	0	TERF2_1658	pool13	1.12368	7.40386	-5.1565	17.3333	84.175	telomeric repeat binding factor 2
GADD45G	-0.0355989	0.443818	0	1	GADD45G_105	pool12	1.1232	1.8334	0.413003	23.5118	85.2378	growth arrest and DNA damage inducible gamma
PSEN1	-0.360215	-0.315514	0	0	PSEN1_1444	pool13	1.12304	0.621465	1.62462	441.839	928.985	presenilin 1
SNW1	-0.274252	-0.00256993	0	0	SNW1_293	pool12	1.11587	2.81572	-0.583971	46.1709	326.338	SNW domain containing 1
HIPK1	-0.603452	-0.632831	2	0	HIPK1_1299	pool13	1.11474	2.50405	-0.274572	403.19	923.083	homeodomain interacting protein kinase 1
CD74	-1.09205	-0.962972	0	0	CD74_672	pool11	1.11416	2.22832	0	10.3295	50.2456	CD74 molecule
SLC30A9	-0.195997	0.0688983	0	0	SLC30A9_2575	pool13	1.10964	0.659169	1.56011	2005.52	4163.36	solute carrier family 30 (zinc transporter), member 9
DEK	-0.870632	-0.433798	2	0	DEK_508	pool11	1.1045	-0.984078	3.19307	240.696	777.178	DEK proto-oncogene
MEIR5	-0.196953	0.0134522	0	0	MEIR5_288	pool13	1.10391	0.531418	1.6764	1195.52	2615.76
SUMO1	-0.192059	-0.0439757	0	0	SUMO1_430	pool13	1.10141	3.40552	-1.2027	279.016	1192.99	small ubiquitin-like modifier 1
C1orf124	-0.0437835	0.107015	0	1	C1orf124_2508	pool12	1.09478	-0.334279	2.52383	718.795	1028.83
PRMT6	-0.182567	0.079355	0	2	PRMT6_2524	pool12	1.09065	-0.134103	2.31541	177.257	163.467	protein arginine methyltransferase 6
UBE2N	-0.080765	0.17192	0	0	UBE2N_1668	pool13	1.08813	1.89976	0.276501	349.631	1220.84	ubiquitin conjugating enzyme E2N
POLR2H	-0.164944	0.0160581	0	1	POLR2H_198	pool11	1.08339	8.93165	-6.76486	272.947	245.669	polymerase (RNA) II (DNA directed) polypeptide H
USP3	-0.560983	-0.352128	0	0	USP3_559	pool11	1.08239	-0.152166	2.31695	1082.21	3261.81	ubiquitin specific peptidase 3
EEPD1	-0.0433514	-0.445511	0	1	EEPD1_4635	pool12	1.07862	1.16131	0.995928	189.196	424.272	endonuclease/exonuclease/phosphatase family domain containing 1
C9orf119	-0.0438796	0.560036	0	2	C9orf119_623	pool12	1.07721	2.15443	0	116.64	521
IGHMBP2	-0.254067	-0.46801	2	1	IGHMBP2_2678	pool13	1.07675	1.93793	0.215564	449.255	1163.43	immunoglobulin mu binding protein 2
C19orf39	-0.141523	-0.0769115	1	1	C19orf39_1262	pool12	1.07664	-0.0210332	2.17431	1376.47	2841.47
PSMB1	-0.343423	-0.324863	0	0	PSMB1_466	pool11	1.07482	1.22721	0.92244	129.792	304.98	proteasome subunit beta 1
POLR2F	-0.284749	-0.393941	0	0	POLR2F_1308	pool12	1.07343	0.188794	1.95806	618.957	1853.66	polymerase (RNA) II (DNA directed) polypeptide F
POLA1	-0.415217	-0.261457	0	0	POLA1_4244	pool11	1.07096	-1.29015	3.43207	622.473	2558.45	polymerase (DNA directed), alpha 1, catalytic subunit
TOPBP1	-0.193413	-0.00651968	0	1	TOPBP1_2146	pool12	1.06985	1.50593	0.633767	132.319	376.671	topoisomerase (DNA) II binding protein 1
RAD51L1	-0.099469	-0.881074	2	1	RAD51L1_733	pool12	1.06681	2.13361	0	7.89848	36.3538
WNT1	-0.270592	-0.0574959	0	0	WNT1_2026	pool13	1.06545	0.322144	1.80875	3851.92	8853.09	wingless-type MMTV integration site family member 1
CIB1	-0.216883	-0.294051	1	0	CIB1_928	pool11	1.06244	0.482749	1.64212	1239.67	2854.85	calcium and integrin binding 1
EEF1E1	-0.589898	-0.971022	1	0	EEF1E1_169	pool13	1.0575	0.86712	1.24789	399.382	851.354	eukaryotic translation elongation factor 1 epsilon 1
RDM1	-0.0507076	0.137392	0	0	RDM1_197	pool12	1.0562	1.69939	0.413003	86.6996	282.858	RAD52 motif containing 1
GTF2H2C	-0.0408155	0.56607	0	1	GTF2H2C_869	pool13	1.05429	0.795457	1.31313	718.864	1486.12	GTF2H2 family member C
C16orf5	-0.160899	-0.370285	0	0	C16orf5_1708	pool13	1.05335	-0.378688	2.48538	1326.95	3968.54
EID3	-0.274578	-0.105407	0	0	EID3_964	pool13	1.04995	1.14391	0.955984	237.496	494.124	EP300 interacting inhibitor of differentiation 3
PSMD2	-0.0636371	0.358129	0	1	PSMD2_890	pool12	1.04644	2.19529	-0.102406	32.8934	149.671	proteasome 26S subunit, non-ATPase 2
TAF9	-0.00340078	0.968996	0	0	TAF9_258	pool13	1.04518	0.957986	1.13237	2827.79	5837.49	TATA-box binding protein associated factor 9
CRY1	-0.0981604	-0.208801	0	1	CRY1_1624	pool11	1.04512	1.40307	0.687166	734.014	1402.5	cryptochrome circadian clock 1
BATF	-0.19942	-0.270511	1	1	BATF_907	pool13	1.04325	0.607989	1.47852	1389.69	2858.46	basic leucine zipper transcription factor, ATF-like
MCM7	-0.240559	-0.10513	0	0	MCM7_8	pool11	1.04034	-0.429822	2.51051	208.002	895.889	minichromosome maintenance complex component 7
IER3	-0.183427	0.0629839	0	1	IER3_933	pool12	1.04009	0.0213535	2.05883	225.61	512.049	immediate early response 3
PSMA2	-1.2321	-0.405718	2	0	PSMA2_930	pool11	1.03849	0.40912	1.66785	1023.19	2184.15	proteasome subunit alpha 2
POLI	-0.197774	-0.139363	0	0	POLI_5287	pool11	1.03615	0.949353	1.12294	2839.9	5921.58	polymerase (DNA directed) iota
TDG	-0.298259	-0.134481	1	0	TDG_821	pool11	1.03526	0.305847	1.76467	300.804	673.43	thymine DNA glycosylase
PSME4	-0.154964	-0.186686	0	0	PSME4_2805	pool11	1.02724	0.9809	1.07358	906.911	1849.34	proteasome activator subunit 4
ATRX	-2.10237	-0.928486	1	1	ATRX_123	pool13	1.02546	0.19188	1.85903	1599.34	3892.8	alpha thalassemia/mental retardation syndrome X-linked
FANCL	-0.0739149	0.491605	1	1	FANCL_900	pool12	1.02034	-0.0314425	2.07213	0.800542	3.18003	Fanconi anemia complementation group L
FEM1B	-0.150089	0.425159	0	3	FEM1B_802	pool13	1.01512	0.704835	1.3254	425.121	944.914	fem-1 homolog b (C. elegans)
POLR2H	-0.164944	0.0160581	0	1	POLR2H_505	pool11	1.00766	0.616258	1.39907	646.774	1373.76	polymerase (RNA) II (DNA directed) polypeptide H
CEBPG	-0.129596	0.00309449	0	0	CEBPG_3538	pool11	1.00386	0.148807	1.85891	3330.59	8189.66	CCAAT/enhancer binding protein gamma
APEX1	-0.254223	-0.246494	0	0	APEX1_1187	pool11	1.00312	-5.51665	7.52288	189.261	129.433	APEX nuclease (multifunctional DNA repair enzyme) 1
INTS3	-0.159957	-0.603975	1	0	INTS3_2892	pool12	0.997273	-1.58294	3.57749	69.0658	28.1901	integrator complex subunit 3
GRB2	-0.144299	0.0257647	0	0	GRB2_3085	pool13	0.996802	-0.122251	2.11586	1475.24	4072.57	growth factor receptor bound protein 2
MBD4	-0.0204061	0.344958	0	2	MBD4_941	pool11	0.996614	0.879034	1.11419	1314	2639.51	methyl-CpG binding domain 4 DNA glycosylase
RBBP5	-0.045854	0.310247	0	0	RBBP5_4233	pool12	0.992267	-0.23789	2.22242	1270.02	2129.58	retinoblastoma binding protein 5
CCNK	-0.0191788	0.324588	0	0	CCNK_135	pool12	0.990336	-0.354639	2.33531	535.457	423.869	cyclin K
SNAI2	-0.110418	0.0101054	0	2	SNAI2_1844	pool11	0.987053	0.914024	1.06008	885.709	1786.78	snail family zinc finger 2
CHRNA4	-0.318578	-0.993106	0	0	CHRNA4_4720	pool13	0.98649	0.697702	1.27528	326.523	644.773	cholinergic receptor nicotinic alpha 4 subunit
CXCL12	-0.820736	-0.637518	0	0	CXCL12_228	pool13	0.9858	0.0831336	1.88847	703.613	1577.05	chemokine (C-X-C motif) ligand 12
DDIT4	-0.00182788	0.164309	0	2	DDIT4_1680	pool11	0.985434	0.631679	1.33919	501.002	925.949	DNA damage inducible transcript 4
UBE2D3	-0.116736	-0.0180908	0	1	UBE2D3_1668	pool11	0.98396	-0.122791	2.09071	238.142	647.588	ubiquitin conjugating enzyme E2D 3
MICA	-0.340274	-0.295678	0	1	MICA_982	pool11	0.979357	1.88379	0.0749207	235.848	437.512	MHC class I polypeptide-related sequence A
CASP2	-0.404614	-0.350665	0	1	CASP2_3113	pool11	0.978733	-0.403154	2.36062	3158.3	6368.21	caspase 2
MBD4	-0.0204061	0.344958	0	2	MBD4_985	pool11	0.976365	0.994589	0.95814	349.365	686.614	methyl-CpG binding domain 4 DNA glycosylase
STK11	-0.299816	-0.457673	0	0	STK11_1396	pool12	0.974997	1.14417	0.805819	790.058	1632.23	serine/threonine kinase 11
TRIM28	-0.0420577	0.692076	0	1	TRIM28_1839	pool11	0.972989	0.729278	1.2167	2502.76	5052.87	tripartite motif containing 28
UBR5	-0.116963	-0.313096	0	0	UBR5_4061	pool11	0.972358	-0.215299	2.16001	575.46	1305.62	ubiquitin protein ligase E3 component n-recognin 5
CASP9	-0.180588	0.141162	0	1	CASP9_1279	pool12	0.971635	1.53027	0.413003	45.554	132.688	caspase 9
CRIP1	-0.059633	-0.4011	0	1	CRIP1_330	pool11	0.96986	1.83623	0.103493	471.318	979.135	cysteine rich protein 1
MRPS11	-0.309981	-0.398483	0	0	MRPS11_465	pool12	0.966328	2.10362	-0.170968	47.273	203.916	mitochondrial ribosomal protein S11
MUTYH	-0.0190427	-0.883392	1	1	MUTYH_233	pool11	0.964871	-0.185281	2.11502	56.123	185.033	mutY DNA glycosylase
FANCL	-0.0739149	0.491605	1	1	FANCL_901	pool12	0.961514	0.221379	1.70165	1403.43	2719.29	Fanconi anemia complementation group L
EXO1	-0.310602	-0.359519	0	1	EXO1_3053	pool11	0.961498	-0.079031	2.00203	676.134	1427.38	exonuclease 1
RAD21	-0.145269	-0.203148	0	0	RAD21_2917	pool13	0.958183	-0.106565	2.02293	1005.5	2268.14	RAD21 cohesin complex component
FANCE	-0.344477	-0.466609	0	0	FANCE_982	pool11	0.957728	-0.0109424	1.9264	144.976	249.099	Fanconi anemia complementation group E
TERF2IP	-0.108407	-0.0326393	0	1	TERF2IP_1039	pool13	0.95715	1.88931	0.0249902	1030.67	2129.5	telomeric repeat binding factor 2, interacting protein
SMC2	-0.250805	-0.635261	0	1	SMC2_2489	pool11	0.951932	-0.927821	2.83169	392.636	1154.58	structural maintenance of chromosomes 2
RAD9A	-0.226872	-0.0956091	0	0	RAD9A_1591	pool11	0.946285	8.184	-6.29143	56.1949	145.135	RAD9 checkpoint clamp component A
ASCC3	-0.0653501	0.104467	0	0	ASCC3_360	pool11	0.943836	0.752898	1.13477	168.029	319.565	activating signal cointegrator 1 complex subunit 3
BRCC3	-0.400444	-0.220981	0	0	BRCC3_817	pool13	0.939922	0.70624	1.1736	539.448	1066.45	BRCA1/BRCA2-containing complex subunit 3
STUB1	-0.0304909	-0.361411	0	0	STUB1_1546	pool13	0.93679	0.304548	1.56903	311.829	536.614	STIP1 homology and U-box containing protein 1, E3 ubiquitin protein ligase
MRE11A	-0.139542	-0.163929	0	0	MRE11A_3334	pool12	0.93516	0.400608	1.46971	2379.47	4857.42	MRE11 homolog A, double strand break repair nuclease
MGMT	-0.0635365	0.240861	0	0	MGMT_124	pool13	0.934377	0.652413	1.21634	221.232	450.939	O-6-methylguanine-DNA methyltransferase
FEN1	-0.0198148	0.677161	0	2	FEN1_1749	pool12	0.934202	1.29208	0.576327	217.191	522.552	flap structure-specific endonuclease 1
PSMD11	-0.386581	-0.433563	3	0	PSMD11_1014	pool13	0.923728	0.131498	1.71596	2578.52	5476.49	proteasome 26S subunit, non-ATPase 11
HMOX1	-0.286341	-0.0784176	0	1	HMOX1_1451	pool11	0.922541	0.639062	1.20602	2401.66	5001.02	heme oxygenase 1
CCNK	-0.0191788	0.324588	0	0	CCNK_2571	pool12	0.915667	-0.342703	2.17404	5228.59	8489.88	cyclin K
TNP1	-0.487182	-0.236422	2	1	TNP1_229	pool13	0.910816	9.69395	-7.87232	161.447	413.825	transition protein 1
UACA	-0.0275195	0.33762	0	1	UACA_2840	pool12	0.909851	1.08599	0.733709	95.5165	203.659	uveal autoantigen with coiled-coil domains and ankyrin repeats
MCL1	-0.137094	-0.0408155	0	1	MCL1_1231	pool11	0.906774	2.27129	-0.457739	74.065	358.564	myeloid cell leukemia 1
CASP3	-0.215525	-0.447453	0	0	CASP3_2116	pool11	0.897943	0.396169	1.39972	3124.95	7144.4	caspase 3
REV1	-0.120503	0.113284	0	0	REV1_2785	pool12	0.896356	-0.343953	2.13667	1444.3	2594.79	REV1, DNA directed polymerase
PLK5	-0.551912	-0.387322	1	0	PLK5_517	pool13	0.895887	5.92171	-4.12993	8.43408	40.7298	polo like kinase 5
ACTR8	-0.179339	-1.06098	0	0	ACTR8_1046	pool12	0.893999	1.63826	0.149738	203.773	634.937	ARP8 actin-related protein 8 homolog (yeast)
WRNIP1	-0.0544822	1.06651	0	2	WRNIP1_1373	pool12	0.885548	1.35809	0.413003	69.9842	180.349	Werner helicase interacting protein 1
SPRED1	-0.494714	-0.600153	0	0	SPRED1_1060	pool13	0.87827	0.539869	1.21667	304.004	613.675	sprouty-related, EVH1 domain containing 1
DDX5	-0.0166895	0.0261336	0	1	DDX5_1978	pool12	0.874839	0.280927	1.46875	588.108	1126.18	DEAD-box helicase 5
NIPBL	-0.242984	0.10824	0	0	NIPBL_3193	pool11	0.870612	-0.129886	1.87111	2535.14	5409.58	Nipped-B homolog (Drosophila)
ZMAT3	-4	-1.52433	3	1	ZMAT3_5600	pool13	0.870505	1.61933	0.12168	300.745	625.341	zinc finger matrin-type 3
TIMELESS	-0.291069	-0.0312836	0	1	TIMELESS_4750	pool11	0.863613	0.364332	1.36289	1963.08	4044.3	timeless circadian clock
ERCC6	-0.286425	-2.14267	2	1	ERCC6_4137	pool13	0.859371	-0.0288278	1.74757	451.865	841.314	excision repair cross-complementation group 6
GRB2	-0.144299	0.0257647	0	0	GRB2_473	pool13	0.857741	1.22698	0.488501	2642.53	4757.38	growth factor receptor bound protein 2
FBXO45	-1.70774	-1.36754	2	0	FBXO45_2866	pool13	0.857239	0.885635	0.828843	331.792	600.001	F-box protein 45
PTPN11	-0.649364	-0.260032	0	0	PTPN11_5380	pool13	0.854621	-1.32837	3.03761	423.201	2018.78	protein tyrosine phosphatase, non-receptor type 11
GNL1	-0.0742755	0.0536951	0	1	GNL1_546	pool13	0.853149	3.02322	-1.31692	163.726	386.408	guanine nucleotide binding protein-like 1
DTL	-0.0286314	-1.49894	0	0	DTL_306	pool11	0.851279	-0.412002	2.11456	92.292	300.759	denticleless E3 ubiquitin protein ligase homolog
RAD1	-0.0856568	0.24504	0	1	RAD1_1876	pool12	0.850334	-0.0199431	1.72061	2359.29	4253.64	RAD1 checkpoint DNA exonuclease
HMGB1	-0.502241	-0.0548762	0	0	HMGB1_2683	pool11	0.850145	0.541676	1.15861	6796.29	12939	high mobility group box 1
CDKN1B	-0.162475	-0.503209	0	0	CDKN1B_2028	pool12	0.847215	0.436403	1.25803	95.3466	130.675	cyclin-dependent kinase inhibitor 1B (p27, Kip1)
TRIAP1	-0.126215	-0.124591	0	1	TRIAP1_177	pool11	0.843522	-1.169	2.85604	296.708	689.214	TP53 regulated inhibitor of apoptosis 1
KIAA0101	-0.350373	-0.35047	1	0	KIAA0101_550	pool11	0.843348	0.261758	1.42494	1956.31	3973.93	KIAA0101
TAF9	-0.00340078	0.968996	0	0	TAF9_655	pool13	0.841922	-0.994385	2.67823	363.694	1280.49	TATA-box binding protein associated factor 9
STUB1	-0.0304909	-0.361411	0	0	STUB1_1547	pool13	0.838843	0.532551	1.14514	386.502	654.256	STIP1 homology and U-box containing protein 1, E3 ubiquitin protein ligase
RBBP5	-0.045854	0.310247	0	0	RBBP5_4120	pool12	0.838715	-0.590088	2.26752	12.8854	16.5126	retinoblastoma binding protein 5
SMC1B	-0.327164	-0.665747	1	0	SMC1B_4000	pool13	0.838616	0.582651	1.09458	1140.14	2062.01	structural maintenance of chromosomes 1B
PAXIP1	-0.283496	-0.310514	1	0	PAXIP1_1443	pool11	0.837788	-0.743925	2.4195	34.9992	86.7582	PAX interacting (with transcription-activation domain) protein 1
MASTL	-0.0085524	0.43086	1	2	MASTL_1388	pool12	0.836561	-0.480079	2.1532	570.828	1270.03	microtubule associated serine/threonine kinase like
RPS27L	-0.0403386	0.653451	0	1	RPS27L_359	pool11	0.834177	0.666413	1.00194	890.584	1574.39	ribosomal protein S27 like
RPA4	-0.0797201	0.106627	0	1	RPA4_1452	pool12	0.829736	0.184543	1.47493	1492.15	2746.64	replication protein A4
ASTE1	-0.0257186	-0.14315	0	0	ASTE1_2426	pool11	0.826877	0.0363798	1.61737	1790.5	3826.37	asteroid homolog 1 (Drosophila)
CCNH	-1.07831	-0.397072	1	0	CCNH_789	pool13	0.826798	0.935976	0.71762	7537.12	13560.6	cyclin H
BRIP1	-0.0295137	0.29056	0	3	BRIP1_2684	pool12	0.826638	1.24027	0.413003	104.701	248.196	BRCA1 interacting protein C-terminal helicase 1
PMAIP1	-0.280586	-0.0669685	0	0	PMAIP1_1543	pool11	0.825792	-0.0893187	1.7409	163.387	400.513	phorbol-12-myristate-13-acetate-induced protein 1
SMARCAD1	-0.869988	-0.527097	0	0	SMARCAD1_2661	pool12	0.825201	0.916693	0.733709	101.762	192.88	SWI/SNF-related, matrix-associated actin-dependent regulator of chromatin, subfamily a, containing DEAD/H box 1
TRIP13	-1.27003	-0.957818	1	0	TRIP13_858	pool11	0.824519	0.649836	0.999202	435.408	788.193	thyroid hormone receptor interactor 13
MLH1	-0.130944	-0.822464	0	0	MLH1_2132	pool11	0.821607	-0.998711	2.64193	1152.14	2811.62	mutL homolog 1
TAF1	-4	-1.23958	2	0	TAF1_4904	pool13	0.821104	3.29288	-1.65067	180.265	941.166	TATA-box binding protein associated factor 1
XIAP	-0.439735	-0.924818	1	0	XIAP_2155	pool13	0.818389	-0.197489	1.83427	1111.72	2133.59	X-linked inhibitor of apoptosis
LYN	-0.050854	0.453087	0	2	LYN_460	pool11	0.817611	0.864618	0.770604	11.639	21.9349	LYN proto-oncogene, Src family tyrosine kinase
PSMA6	-0.221126	0.091247	0	1	PSMA6_270	pool12	0.812609	-7.0177	8.64292	64.29	199.37	proteasome subunit alpha 6
FANCI	-0.336488	-0.405386	1	0	FANCI_1280	pool11	0.809478	0.662608	0.956348	1149.79	2022.15	Fanconi anemia complementation group I
LRDD	-0.299642	-0.502103	0	0	LRDD_198	pool12	0.809032	1.61806	0	47.2072	145.943
FBXW7	-1.10403	-0.75721	0	0	FBXW7_102	pool13	0.808035	1.22402	0.39205	206.215	326.387	F-box and WD repeat domain containing 7
PSMB11	-0.289883	-0.135074	1	0	PSMB11_1500	pool13	0.805446	1.47464	0.136255	383.769	776.826	proteasome (prosome, macropain) subunit, beta type, 11
PSME4	-0.154964	-0.186686	0	0	PSME4_1418	pool11	0.805368	9.2466	-7.63587	98.9479	303.221	proteasome activator subunit 4
RBBP5	-0.045854	0.310247	0	0	RBBP5_2405	pool12	0.801792	1.19163	0.411957	264.757	605.301	retinoblastoma binding protein 5
KIAA1530	-0.299123	-0.267204	0	0	KIAA1530_3855	pool13	0.800457	0.368981	1.23193	1845.36	3304.75
MUC1	-0.173925	-0.199008	1	1	MUC1_178	pool12	0.800224	1.60045	0	14.5112	45.0195	mucin 1, cell surface associated
USP1	-0.122053	0.0207704	0	1	USP1_3154	pool11	0.797309	-0.236933	1.83155	1911.27	4479.22	ubiquitin specific peptidase 1
PSMD3	-0.18923	-0.464453	0	1	PSMD3_2109	pool12	0.795212	-0.709596	2.30002	414.891	458.847	proteasome 26S subunit, non-ATPase 3
POLR2J	-0.0515381	0.650917	0	1	POLR2J_120	pool11	0.794807	1.17097	0.418646	833.311	1225.6	polymerase (RNA) II (DNA directed) polypeptide J, 13.3kDa
RAD9A	-0.226872	-0.0956091	0	0	RAD9A_2083	pool11	0.794272	2.21771	-0.629164	381.784	496.709	RAD9 checkpoint clamp component A
TERF2IP	-0.108407	-0.0326393	0	1	TERF2IP_2078	pool13	0.794	0.265966	1.32203	781.783	1458.91	telomeric repeat binding factor 2, interacting protein
FTO	-0.680062	-1.7986	1	0	FTO_3418	pool13	0.793264	1.36856	0.217971	292.825	570.754	fat mass and obesity associated
INTS3	-0.159957	-0.603975	1	0	INTS3_4114	pool12	0.787778	1.57556	0	65.7595	196.987	integrator complex subunit 3
MAPK14	-0.176461	-0.289544	0	1	MAPK14_663	pool12	0.785775	0.977598	0.593951	538.003	922.164	mitogen-activated protein kinase 14
ASTE1	-0.0257186	-0.14315	0	0	ASTE1_553	pool11	0.784226	0.07673	1.49172	534.461	1113.23	asteroid homolog 1 (Drosophila)
SUMO1	-0.192059	-0.0439757	0	0	SUMO1_675	pool13	0.782002	-0.179946	1.74395	466.908	1051.78	small ubiquitin-like modifier 1
MGMT	-0.0635365	0.240861	0	0	MGMT_100	pool13	0.781005	0.005328	1.55668	3398.59	6510.7	O-6-methylguanine-DNA methyltransferase
SFN	-0.383419	-1.64397	2	0	SFN_1279	pool13	0.780773	0.129606	1.43194	389.89	800.012	stratifin
PSME3	-1.41341	-0.590236	2	0	PSME3_668	pool13	0.775833	0.611131	0.940535	451.534	775.857	proteasome activator subunit 3
CSNK1E	-0.144541	0.0710412	0	1	CSNK1E_1355	pool12	0.775478	0.233269	1.31769	4372.51	6892.2	casein kinase 1 epsilon
FANCA	-0.00722564	0.373968	0	0	FANCA_492	pool12	0.77277	-0.730842	2.27638	2083.26	3970.56	Fanconi anemia complementation group A
KAT5	-0.34727	-0.322849	1	0	KAT5_1422	pool13	0.771267	-0.376922	1.91946	1353.21	2536.86	lysine acetyltransferase 5
INO80E	-0.0488568	0.364416	0	0	INO80E_244	pool12	0.770785	-0.189692	1.73126	601.754	528.712	INO80 complex subunit E
MAPK1	-0.412289	-0.295163	2	0	MAPK1_993	pool13	0.769664	1.1899	0.349432	691.908	1179.36	mitogen-activated protein kinase 1
SMC1B	-0.327164	-0.665747	1	0	SMC1B_2781	pool13	0.767668	0.464198	1.07114	475.345	842.078	structural maintenance of chromosomes 1B
IRF7	-0.0154727	-0.223807	0	1	IRF7_1780	pool11	0.765579	7.41137	-5.88021	134.42	86.4072	interferon regulatory factor 7
CDKN1A	-0.68382	-0.355857	0	1	CDKN1A_581	pool11	0.762481	0.908381	0.616582	2547.54	4292.44	cyclin-dependent kinase inhibitor 1A (p21, Cip1)
NEK11	-0.00335701	0.38764	0	0	NEK11_717	pool12	0.760559	1.52112	0	176.155	506.522	NIMA related kinase 11
FGF10	-0.814741	-1.03621	1	0	FGF10_422	pool13	0.758974	0.327557	1.19039	1014.87	1743.37	fibroblast growth factor 10
UBB	-1.54975	-1.80688	2	0	UBB_820	pool13	0.7582	0.730518	0.785881	2528.12	4272.07	ubiquitin B
ING2	-0.0163286	0.532836	0	2	ING2_1042	pool12	0.758122	0.119332	1.39691	1348.77	2145.66	inhibitor of growth family member 2
MRPS26	-0.15658	-0.0535477	0	1	MRPS26_733	pool12	0.753861	1.50772	0	5.51057	16.5917	mitochondrial ribosomal protein S26
SLC30A9	-0.195997	0.0688983	0	0	SLC30A9_737	pool13	0.753412	0.0602613	1.44656	1269	2671.42	solute carrier family 30 (zinc transporter), member 9
GTF2H3	-0.34113	-0.345823	0	0	GTF2H3_462	pool11	0.752874	-0.387148	1.8929	1560.51	3077.49	general transcription factor IIH subunit 3
RBBP5	-0.045854	0.310247	0	0	RBBP5_2491	pool12	0.751944	-0.57276	2.07665	1069.25	1577.57	retinoblastoma binding protein 5
NFRKB	-0.0143939	0.493766	0	2	NFRKB_981	pool12	0.750766	0.316606	1.18493	2129.1	3641.91	nuclear factor related to kappaB binding protein
ASF1A	-0.0185438	0.292515	1	2	ASF1A_1322	pool12	0.748743	-1.00919	2.50668	1498.42	3703.1	anti-silencing function 1A histone chaperone
BAZ1B	-0.333014	-0.648011	1	0	BAZ1B_2041	pool13	0.747441	0.0526036	1.44228	1483.93	2556.55	bromodomain adjacent to zinc finger domain 1B
EPHA2	-0.0268259	0.0695604	0	1	EPHA2_1949	pool11	0.742922	-3.21555	4.70139	38.2016	127.43	EPH receptor A2
INO80E	-0.0488568	0.364416	0	0	INO80E_1152	pool12	0.74238	0.453191	1.03157	3898.66	6558.8	INO80 complex subunit E
ALKBH3	-0.0401957	0.552532	1	2	ALKBH3_1080	pool12	0.742341	-1.07086	2.55554	916.434	2143.56	alkB homolog 3, alpha-ketoglutarate-dependent dioxygenase
PSMD11	-0.386581	-0.433563	3	0	PSMD11_700	pool13	0.740139	-0.0386985	1.51898	544.192	1005.53	proteasome 26S subunit, non-ATPase 11
TP73	-0.98506	-0.38426	2	0	TP73_4454	pool13	0.738993	0.411879	1.06611	779.533	1338.74	tumor protein p73
C10orf90	-0.344958	-0.0982149	0	0	C10orf90_159	pool13	0.738829	0.0492595	1.4284	2922.35	5688.81	chromosome 10 open reading frame 90
KDM1A	-0.100344	0.114074	0	2	KDM1A_1316	pool12	0.737654	-0.15848	1.63379	3118.29	6112.79	lysine demethylase 1A
LIG3	-0.184754	-0.0290026	0	2	LIG3_2011	pool12	0.735211	1.05742	0.413003	93.6797	195.673	ligase III, DNA, ATP-dependent
ERCC4	-0.129596	-0.231066	1	0	ERCC4_1377	pool12	0.728197	1.04339	0.413003	121.416	250.943	excision repair cross-complementation group 4
BRSK1	-0.273599	-0.131591	1	0	BRSK1_2079	pool13	0.727725	0.832678	0.622772	917.205	1503.54	BR serine/threonine kinase 1
FBXO45	-1.70774	-1.36754	2	0	FBXO45_1231	pool13	0.726439	-1.06007	2.51295	430.6	1216.68	F-box protein 45
NEIL3	-0.303207	-0.228192	2	0	NEIL3_641	pool11	0.725285	0.42991	1.02066	1874.63	3244.53	nei like DNA glycosylase 3
PSMB8	-0.476904	-0.618524	0	0	PSMB8_897	pool11	0.723846	-1.38814	2.83583	841.399	1970.58	proteasome subunit beta 8
RRM2B	-0.195111	-0.0167798	1	2	RRM2B_2888	pool13	0.723075	0.901553	0.544597	1294.96	2179.33	ribonucleotide reductase regulatory TP53 inducible subunit M2B
FANCD2	-0.297656	-0.117134	0	1	FANCD2_1774	pool12	0.721977	0.226216	1.21774	349.554	409.643	Fanconi anemia complementation group D2
PTTG1	-0.356547	-0.073709	0	0	PTTG1_19	pool11	0.721317	-0.0825555	1.52519	4272.77	7869.57	pituitary tumor-transforming 1
ACTR5	-0.0103722	0.428757	0	3	ACTR5_1911	pool12	0.721215	1.76665	-0.324215	72.2022	244.828	ARP5 actin-related protein 5 homolog (yeast)
AEN	-0.756962	-0.526513	0	0	AEN_3060	pool11	0.720946	1.03248	0.409411	1951.42	3568.36	apoptosis enhancing nuclease
SOD1	-0.0736061	-0.547294	1	1	SOD1_698	pool13	0.718564	2.16734	-0.730214	734.754	1042.78	superoxide dismutase 1, soluble
SIRT1	-0.0859214	0.120216	0	1	SIRT1_2186	pool13	0.7133	1.19905	0.227547	1863.43	2957.93	sirtuin 1
TDG	-0.298259	-0.134481	1	0	TDG_2804	pool11	0.712391	0.553362	0.87142	1303.82	2085.05	thymine DNA glycosylase
BAG6	-0.183427	-0.0318441	0	0	BAG6_2799	pool12	0.712386	-0.090202	1.51497	2063.3	2679.14	BCL2 associated athanogene 6
ERCC4	-0.129596	-0.231066	1	0	ERCC4_592	pool12	0.711293	0.548287	0.874298	600.717	970.865	excision repair cross-complementation group 4
CHRNA4	-0.318578	-0.993106	0	0	CHRNA4_4078	pool13	0.711271	1.66375	-0.241204	127.149	173.844	cholinergic receptor nicotinic alpha 4 subunit
POLR2D	-0.0399099	0.742561	0	0	POLR2D_1708	pool11	0.710478	1.42096	0	7.41029	20.6808	polymerase (RNA) II (DNA directed) polypeptide D
PSMD8	-0.241467	-1.14086	1	1	PSMD8_44	pool12	0.710121	1.00724	0.413003	111.313	224.418	proteasome 26S subunit, non-ATPase 8
RPA2	-0.708853	-0.608359	1	0	RPA2_913	pool12	0.707761	1.41552	0	15.6133	42.4832	replication protein A2
RAD17	-0.4133	-0.663941	0	0	RAD17_1289	pool12	0.707532	-0.973689	2.38875	1106.34	2715.5	RAD17 checkpoint clamp loader component
FANCA	-0.00722564	0.373968	0	0	FANCA_297	pool12	0.700668	1.98531	-0.583971	132.687	525.861	Fanconi anemia complementation group A
RHNO1	-0.00370728	0.396423	0	2	RHNO1_1192	pool12	0.700367	-0.551793	1.95253	526.458	895.745	RAD9-HUS1-RAD1 interacting nuclear orphan 1
PSMB10	-0.203634	0.0143041	0	1	PSMB10_962	pool12	0.69775	-0.192771	1.58827	3080.11	4577.64	proteasome subunit beta 10
DEM1	-0.0157878	-2.50864	0	0	DEM1_929	pool13	0.697106	-0.614788	2.009	947.32	2112.89
BRSK1	-0.273599	-0.131591	1	0	BRSK1_1094	pool13	0.696954	0.277557	1.11635	247.586	452.907	BR serine/threonine kinase 1
GADD45A	-0.0488568	-0.60415	0	1	GADD45A_874	pool11	0.696813	0.655972	0.737653	842.406	1381.5	growth arrest and DNA damage inducible alpha
UBE2N	-0.080765	0.17192	0	0	UBE2N_2067	pool13	0.696397	0.514412	0.878381	1014.27	1696.74	ubiquitin conjugating enzyme E2N
PPP2R5C	-0.0867691	0.107405	0	0	PPP2R5C_118	pool12	0.69543	0.0899592	1.3009	482.082	721.958	protein phosphatase 2 regulatory subunit B', gamma
USP1	-0.122053	0.0207704	0	1	USP1_424	pool11	0.695285	-1.49444	2.88501	791.786	2183.61	ubiquitin specific peptidase 1
OTUB1	-4	-0.788079	1	0	OTUB1_1394	pool13	0.693559	-0.380343	1.76746	529.682	1015.11	OTU deubiquitinase, ubiquitin aldehyde binding 1
BTG2	-0.0447935	0.706637	0	2	BTG2_1585	pool12	0.689491	1.38906	-0.0100774	272.023	475.531	BTG family member 2
FOXO3	-0.983803	-1.69465	1	0	FOXO3_4631	pool13	0.685695	1.45124	-0.0798488	2412.12	4196.3	forkhead box O3
POLR2E	-0.0236042	0.298864	0	3	POLR2E_1218	pool12	0.685674	1.37135	0	29.0223	75.8779	polymerase (RNA) II (DNA directed) polypeptide E, 25kDa
SUMO1	-0.192059	-0.0439757	0	0	SUMO1_672	pool13	0.68547	0.292725	1.07822	1170.19	1936.47	small ubiquitin-like modifier 1
XAB2	-0.234108	-0.118159	0	0	XAB2_2638	pool12	0.684187	0.956418	0.411957	483.343	938.403	XPA binding protein 2
MDC1	-0.0009565	-0.594654	1	1	MDC1_1558	pool12	0.681398	1.3628	0	95.1492	245.494	mediator of DNA damage checkpoint 1
RECQL5	-0.236797	-0.316683	1	0	RECQL5_830	pool12	0.680863	1.36173	0	32.8797	85.2834	RecQ like helicase 5
SOX4	-0.337998	-0.188626	1	0	SOX4_4497	pool11	0.680297	1.36059	0	7.63484	20.3895	SRY-box 4
MACROD1	-0.209785	-0.0271494	0	2	MACROD1_559	pool12	0.680228	-0.550575	1.91103	256.631	519.697	MACRO domain containing 1
INO80C	-0.00252624	-0.189029	0	0	INO80C_542	pool13	0.678741	9.45659	-8.09911	189.195	477.57	INO80 complex subunit C
GTF2H2	-0.0456127	0.820448	0	0	GTF2H2_170	pool12	0.678623	0.492369	0.864877	428.112	661.073	general transcription factor IIH subunit 2
RFWD2	-0.041962	0.0045842	0	1	RFWD2_1858	pool12	0.678067	1.94164	-0.58551	34.2971	131.42	ring finger and WD repeat domain 2, E3 ubiquitin protein ligase
CUL4A	-0.0528114	0.513286	0	1	CUL4A_1837	pool11	0.673168	0.442428	0.903908	3971.68	6371.6	cullin 4A
DCLRE1A	-0.8041	-1.59517	1	0	DCLRE1A_3901	pool13	0.672638	0.822378	0.522897	299.148	473.065	DNA cross-link repair 1A
SLC30A9	-0.195997	0.0688983	0	0	SLC30A9_2442	pool13	0.670707	0.16809	1.17332	1298.49	2308.38	solute carrier family 30 (zinc transporter), member 9
MSX1	-0.269218	-0.144966	0	1	MSX1_1658	pool11	0.670384	0.158376	1.18239	613.097	950.24	msh homeobox 1
CHEK1	-0.0594337	0.00718148	0	2	CHEK1_935	pool11	0.670188	1.79812	-0.457739	32.7471	114.473	checkpoint kinase 1
C19orf40	-0.168386	0.132238	0	1	C19orf40_351	pool12	0.669179	-4.23311	5.57146	128.662	242.954
FLJ35220	-0.242528	-0.778847	1	0	FLJ35220_402	pool13	0.669013	0.104547	1.23348	221.404	324.289
FOXO1	-0.0662597	0.123147	0	0	FOXO1_2939	pool12	0.668467	0.924978	0.411957	366.702	696.714	forkhead box O1
NFATC2	-0.100398	0.470698	0	1	NFATC2_2460	pool12	0.666477	0.156928	1.17603	1595.63	2277.7	nuclear factor of activated T-cells, cytoplasmic, calcineurin-dependent 2
UBR5	-0.116963	-0.313096	0	0	UBR5_8028	pool11	0.665922	1.05452	0.277327	497.671	833.406	ubiquitin protein ligase E3 component n-recognin 5
ING4	-0.0320778	-0.548367	0	1	ING4_1194	pool12	0.664396	0.618834	0.709957	846.109	1356.4	inhibitor of growth family member 4
ALKBH2	-0.095555	0.164944	0	1	ALKBH2_111	pool12	0.659503	0.906002	0.413003	212.892	399.529	alkB homolog 2, alpha-ketoglutarate-dependent dioxygenase
UHRF1	-0.00572685	-0.0562582	0	2	UHRF1_2059	pool12	0.659076	0.905149	0.413003	49.5951	93.4808	ubiquitin-like with PHD and ring finger domains 1
AXIN2	-0.335358	-0.0240171	0	0	AXIN2_559	pool13	0.658804	-0.380915	1.69852	154.742	242.138	axin 2
XIAP	-0.439735	-0.924818	1	0	XIAP_1331	pool13	0.655683	0.132302	1.17906	1276.18	1977.61	X-linked inhibitor of apoptosis
RECQL	-0.188358	-0.372327	0	0	RECQL_710	pool11	0.655308	1.17876	0.131858	377.787	561.513	RecQ like helicase
MUM1	-0.0594337	-0.048274	1	0	MUM1_624	pool12	0.655089	1.48115	-0.170968	68.0295	190.283	melanoma associated antigen (mutated) 1
EPC2	-0.673459	-1.80688	1	0	EPC2_950	pool13	0.653961	0.806895	0.501027	600.681	967.301	enhancer of polycomb homolog 2
RECQL	-0.188358	-0.372327	0	0	RECQL_2333	pool11	0.649989	1.76603	-0.466051	248.377	739.371	RecQ like helicase
NUAK1	-0.846185	-1.1945	1	0	NUAK1_6489	pool13	0.649923	-0.314216	1.61406	2612.63	5483.18	NUAK family, SNF1-like kinase, 1
CCNA2	-0.0279824	0.0600317	0	2	CCNA2_2211	pool11	0.649734	9.24383	-7.94437	122.658	302.639	cyclin A2
REV3L	-0.893129	-0.253833	0	1	REV3L_10172	pool11	0.64562	0.368801	0.92244	0	0.593299	REV3 like, DNA directed polymerase zeta catalytic subunit
C1orf124	-0.0437835	0.107015	0	1	C1orf124_2514	pool12	0.645434	-0.144535	1.4354	3642.07	6864.28
TFPT	-4	-1.04239	3	0	TFPT_322	pool13	0.644506	1.34104	-0.0520302	1908.25	2964.46	TCF3 (E2A) fusion partner (in childhood Leukemia)
PSMD4	-0.23381	-0.437113	1	1	PSMD4_148	pool13	0.643656	-0.112087	1.3994	18.9991	50.5912	proteasome 26S subunit, non-ATPase 4
PARP4	-0.347174	-0.182038	1	1	PARP4_2277	pool11	0.639895	-0.199783	1.47957	1472.56	2356.11	poly(ADP-ribose) polymerase family member 4
RNF168	-0.295078	-0.257511	1	0	RNF168_1743	pool13	0.639553	0.180207	1.0989	553.788	868.759	ring finger protein 168, E3 ubiquitin protein ligase
YAP1	-0.106072	0.00828672	0	0	YAP1_3579	pool11	0.639551	8.84931	-7.57021	179.6	230.558	Yes associated protein 1
MORF4L2	-0.216883	-0.048177	0	1	MORF4L2_1120	pool12	0.63883	-0.42091	1.69857	446.56	771.575	mortality factor 4 like 2
KIAA0415	-0.0295137	4	0	1	KIAA0415_2082	pool12	0.63551	1.064	0.207022	313.279	419.175
RPS27L	-0.0403386	0.653451	0	1	RPS27L_1041	pool11	0.635078	-0.189218	1.45937	5215.78	9315.58	ribosomal protein S27 like
BARD1	-0.0279361	-0.234108	0	0	BARD1_1648	pool11	0.632467	-0.259189	1.52412	662.522	1199.78	BRCA1 associated RING domain 1
ASH2L	-0.842846	-0.688246	0	0	ASH2L_507	pool13	0.628978	-0.594066	1.85202	1108.52	1558.32	ash2 (absent, small, or homeotic)-like (Drosophila)
NEIL1	-0.0794593	-0.522156	1	2	NEIL1_939	pool13	0.626193	0.611779	0.640608	216.836	335.876	nei like DNA glycosylase 1
EGFR	-0.465213	-1.3279	1	0	EGFR_1309	pool11	0.625237	0.0519333	1.19854	4473.09	7206.06	epidermal growth factor receptor
CDKN2D	-0.125634	-0.0576942	0	1	CDKN2D_644	pool13	0.625031	0.151066	1.099	287.923	482.635	cyclin-dependent kinase inhibitor 2D (p19, inhibits CDK4)
CCNK	-0.0191788	0.324588	0	0	CCNK_834	pool12	0.624069	1.24814	0	12.1233	29.4846	cyclin K
PSMB9	-0.0898026	-0.0155627	1	1	PSMB9_845	pool11	0.620672	0.38101	0.860333	217.732	352.511	proteasome subunit beta 9
MGMT	-0.0635365	0.240861	0	0	MGMT_421	pool13	0.620254	0.95981	0.280698	648.96	1045.85	O-6-methylguanine-DNA methyltransferase
BCL3	-0.0213174	-0.11025	1	2	BCL3_1795	pool12	0.619647	0.82629	0.413003	9.73534	17.8142	B-cell CLL/lymphoma 3
PSEN1	-0.360215	-0.315514	0	0	PSEN1_2887	pool13	0.619611	1.07882	0.160399	682.005	873.562	presenilin 1
KIAA1530	-0.299123	-0.267204	0	0	KIAA1530_673	pool13	0.615233	-1.81334	3.0438	204.676	718.688
IER3	-0.183427	0.0629839	0	1	IER3_606	pool12	0.613617	-2.67205	3.89928	317.225	56.3129	immediate early response 3
OBFC2B	-0.0153827	-0.510886	0	0	OBFC2B_714	pool12	0.613269	1.00731	0.219225	327.459	658.412
TAOK1	-0.114074	-0.140802	1	1	TAOK1_10050	pool12	0.612905	1.39678	-0.170968	73.9074	194.933	TAO kinase 1
UBE2V1	-0.899974	-2.95861	1	0	UBE2V1_1659	pool13	0.612141	-1.04808	2.27236	512.095	1152.87	ubiquitin conjugating enzyme E2 variant 1
TAF1	-4	-1.23958	2	0	TAF1_7241	pool13	0.609728	-0.327197	1.54665	4783.97	8353.25	TATA-box binding protein associated factor 1
TOP2A	-0.0578431	-0.0771708	1	1	TOP2A_1701	pool11	0.609114	0.247529	0.970698	1740.54	2893.26	topoisomerase (DNA) II alpha
PGAP2	-0.0143939	-0.476774	0	1	PGAP2_615	pool12	0.603037	0.472365	0.733709	41.1456	57.6098	post-GPI attachment to proteins 2
CUL4A	-0.0528114	0.513286	0	1	CUL4A_1087	pool11	0.598969	0.974698	0.223241	671.663	1199.58	cullin 4A
FANCM	-0.0503173	-0.16698	0	1	FANCM_2874	pool12	0.597885	0.614266	0.581504	567.059	857.373	Fanconi anemia complementation group M
POLG2	-0.196543	-0.0180003	0	1	POLG2_766	pool11	0.596859	0.0153774	1.17834	1245.51	1569.31	polymerase (DNA directed), gamma 2, accessory subunit
POLD3	-0.000434512	-0.484789	0	0	POLD3_2582	pool11	0.592074	0.437535	0.746613	606.696	927.93	polymerase (DNA-directed), delta 3, accessory subunit
KIAA2022	-0.80827	-0.442733	1	0	KIAA2022_6071	pool13	0.591926	0.708383	0.475468	1906.09	2908.72	KIAA2022
EID3	-0.274578	-0.105407	0	0	EID3_1329	pool13	0.591579	1.05574	0.127422	1010.8	1543.1	EP300 interacting inhibitor of differentiation 3
PSMD9	-0.348625	-0.358129	1	0	PSMD9_2306	pool11	0.591531	0.392995	0.790068	1298.26	2025.69	proteasome 26S subunit, non-ATPase 9
BRE	-1.88606	-0.57659	2	0	BRE_428	pool13	0.591088	0.699747	0.482428	1194.44	1816.59	brain and reproductive organ-expressed (TNFRSF1A modulator)
AP5S1	-0.0522723	-0.0881502	0	1	AP5S1_1717	pool12	0.590759	1.18152	0	0	0.634077	adaptor related protein complex 5 sigma 1 subunit
NSMCE2	-0.223444	-0.200935	0	0	NSMCE2_1168	pool12	0.586123	0.723657	0.448588	1349.59	1967.78	NSE2/MMS21 homolog, SMC5-SMC6 complex SUMO ligase
FMN2	-0.301291	-0.088949	0	0	FMN2_4287	pool13	0.584628	1.38398	-0.214729	1462.41	2478.7	formin 2
SPATA18	-1.51713	-0.559406	1	0	SPATA18_2426	pool13	0.582323	0.859859	0.304788	498.066	769.244	spermatogenesis associated 18
BTG2	-0.0447935	0.706637	0	2	BTG2_1806	pool12	0.579013	0.524259	0.633767	480.955	692.23	BTG family member 2
CHCHD6	-0.368049	-0.853872	0	0	CHCHD6_905	pool13	0.5727	0.107027	1.03837	6727.33	10502.2	coiled-coil-helix-coiled-coil-helix domain containing 6
INTS3	-0.159957	-0.603975	1	0	INTS3_4444	pool12	0.571567	0.215378	0.927756	3310.7	4533.38	integrator complex subunit 3
IRF3	-0.0085524	0.125055	1	1	IRF3_89	pool12	0.570582	0.289162	0.852002	2793.55	4306.33	interferon regulatory factor 3
USP47	-1.30016	-0.50948	0	0	USP47_7262	pool13	0.568869	0.0911451	1.04659	1384.3	2455.8	ubiquitin specific peptidase 47
RDM1	-0.0507076	0.137392	0	0	RDM1_152	pool12	0.564796	0.233747	0.895845	512.497	603.668	RAD52 motif containing 1
TAF9	-0.00340078	0.968996	0	0	TAF9_1067	pool13	0.563911	0.358755	0.769067	3256.48	4839.86	TATA-box binding protein associated factor 9
SSRP1	-0.142788	-0.122111	0	1	SSRP1_2149	pool11	0.559989	-0.214614	1.33459	1976.14	2863.25	structure specific recognition protein 1
TFAP4	-1.49349	-0.209082	0	1	TFAP4_310	pool13	0.559872	-0.367797	1.48754	408.224	765.336	transcription factor AP-4 (activating enhancer binding protein 4)
PHLDA3	-0.160396	0.0166895	0	2	PHLDA3_782	pool12	0.559589	0.96944	0.149738	46.9056	92.167	pleckstrin homology like domain family A member 3
CDC14B	-0.0155177	0.284582	0	2	CDC14B_1252	pool12	0.559351	0.122774	0.995928	135.744	148.343	cell division cycle 14B
STUB1	-0.0304909	-0.361411	0	0	STUB1_1378	pool13	0.559039	0.762728	0.35535	215.572	288.525	STIP1 homology and U-box containing protein 1, E3 ubiquitin protein ligase
RAD54L	-0.289883	-0.224244	0	0	RAD54L_862	pool11	0.557586	0.595044	0.520129	1501.73	2222.96	RAD54-like (S. cerevisiae)
PSMB7	-0.282329	-0.0602811	0	1	PSMB7_400	pool12	0.557245	-3.13497	4.24946	18.067	15.3406	proteasome subunit beta 7
NACC2	-0.673664	-1.09909	1	0	NACC2_2017	pool13	0.549039	0.680939	0.417139	487.942	702.15	NACC family member 2
DNAJA1	-0.12907	-0.565591	1	0	DNAJA1_572	pool13	0.548615	0.412056	0.685174	278.023	407.436	DnaJ heat shock protein family (Hsp40) member A1
TAF1	-4	-1.23958	2	0	TAF1_7007	pool13	0.548506	0.235708	0.861304	1339.9	2028.67	TATA-box binding protein associated factor 1
GTF2H4	-0.186086	-0.0368736	0	1	GTF2H4_1683	pool11	0.547781	0.453918	0.641643	3943.28	5806.59	general transcription factor IIH subunit 4
TEX15	-0.404504	-0.201902	0	0	TEX15_4961	pool13	0.544874	0.685752	0.403995	393.344	581.639	testis expressed 15
NBN	-0.304956	-0.0526643	0	0	NBN_4121	pool11	0.544013	0.556453	0.531574	2687.73	3916.81	nibrin
USP3	-0.560983	-0.352128	0	0	USP3_2131	pool11	0.541424	0.736883	0.345966	589.972	861.624	ubiquitin specific peptidase 3
HMGA1	-0.324497	-0.120904	0	0	HMGA1_1312	pool13	0.540445	1.73723	-0.656341	690.855	1473.17	high mobility group AT-hook 1
MAD2L2	-0.0278435	0.496209	1	2	MAD2L2_611	pool12	0.538348	1.24766	-0.170968	19.7202	47.0874	MAD2 mitotic arrest deficient-like 2 (yeast)
EP300	-0.0192696	-0.000695428	1	0	EP300_517	pool12	0.536979	-5.37194	6.44589	20.2054	43.0891	E1A binding protein p300
RBM38	-0.15422	0.304431	0	1	RBM38_2256	pool11	0.536189	-1.17418	2.24655	1434.27	2851.65	RNA binding motif protein 38
XRCC6BP1	-0.957031	-0.825649	2	0	XRCC6BP1_267	pool13	0.534918	1.915	-0.845161	388.293	808.532
PPP1R15A	-1.13847	-1.50864	1	0	PPP1R15A_50	pool13	0.533212	0.646661	0.419763	390.981	555.606	protein phosphatase 1 regulatory subunit 15A
CEP63	-4	-0.787812	2	0	CEP63_851	pool13	0.532114	-0.85523	1.91946	469.049	1154.64	centrosomal protein 63kDa
TREX1	-0.0404816	0.564156	0	2	TREX1_1464	pool12	0.532089	-0.515353	1.57953	320.899	225.352	three prime repair exonuclease 1
ZFYVE26	-0.219683	-0.292685	1	0	ZFYVE26_8169	pool11	0.531585	0.987187	0.0759826	18.6001	37.2163	zinc finger FYVE-type containing 26
NBN	-0.304956	-0.0526643	0	0	NBN_2970	pool11	0.529799	0.790724	0.268873	2736.43	3875.01	nibrin
SLX4	-0.214314	-0.261775	0	1	SLX4_3137	pool13	0.529559	0.530522	0.528595	763.24	1102.11	SLX4 structure-specific endonuclease subunit
UCHL5	-1.32331	-0.574955	2	0	UCHL5_534	pool13	0.528553	-1.03336	2.09047	570.779	849.731	ubiquitin C-terminal hydrolase L5
TEX15	-0.404504	-0.201902	0	0	TEX15_2435	pool13	0.528127	1.61812	-0.561865	2838.3	4514.53	testis expressed 15
GEN1	-0.0394817	0.711527	0	2	GEN1_3519	pool12	0.526707	0.319704	0.733709	80.0869	100.41	GEN1, Holliday junction 5' flap endonuclease
HMGA1	-0.324497	-0.120904	0	0	HMGA1_22	pool13	0.526299	0.807575	0.245023	1475.56	2124.64	high mobility group AT-hook 1
SMC5	-0.0567034	1.07366	0	3	SMC5_3497	pool11	0.526226	-0.888483	1.94094	92.104	211.095	structural maintenance of chromosomes 5
PSMD5	-0.0298392	0.543786	0	2	PSMD5_2136	pool12	0.520306	0.251548	0.789065	46.1188	55.7652	proteasome 26S subunit, non-ATPase 5
TCEA1	-0.0296531	-0.830326	1	1	TCEA1_366	pool12	0.520144	1.04029	0	15.9806	33.3947	transcription elongation factor A1
EP300	-0.0192696	-0.000695428	1	0	EP300_4862	pool12	0.519206	0.0659449	0.972467	6604.68	8879.34	E1A binding protein p300
CDK9	-0.0521253	0.300336	1	1	CDK9_2329	pool12	0.518147	1.62273	-0.586435	160.188	492.375	cyclin-dependent kinase 9
YAP1	-0.106072	0.00828672	0	0	YAP1_2155	pool11	0.516554	0.0258571	1.00725	513.641	630.674	Yes associated protein 1
SUPT16H	-0.62672	-1.33819	1	0	SUPT16H_1227	pool13	0.515618	-0.553874	1.58511	802.895	1321.48	SPT16 homolog, facilitates chromatin remodeling subunit
DEM1	-0.0157878	-2.50864	0	0	DEM1_2184	pool13	0.514178	0.303256	0.7251	198.584	275.784
FGF10	-0.814741	-1.03621	1	0	FGF10_331	pool13	0.514071	-0.831853	1.86	2010.83	4483.85	fibroblast growth factor 10
PSMD7	-0.0518316	0.439376	0	1	PSMD7_1628	pool12	0.512942	-0.45731	1.48319	974.37	1730.62	proteasome 26S subunit, non-ATPase 7
POLR2K	-0.495257	-0.512862	0	0	POLR2K_516	pool13	0.512656	-0.0786003	1.10391	3167.07	5027.05	polymerase (RNA) II (DNA directed) polypeptide K, 7.0kDa
NFRKB	-0.0143939	0.493766	0	2	NFRKB_1419	pool12	0.511974	-0.208412	1.23236	1262.68	1859.47	nuclear factor related to kappaB binding protein
SP100	-0.0332483	-0.322667	0	0	SP100_1756	pool11	0.510149	0.375839	0.644459	1107.24	1561.32	SP100 nuclear antigen
CUL4B	-0.0590853	-0.257825	0	2	CUL4B_1626	pool11	0.509215	0.0510335	0.967396	1750.13	2409.36	cullin 4B
SLC30A9	-0.195997	0.0688983	0	0	SLC30A9_2043	pool13	0.508926	0.217352	0.800501	199.809	313.722	solute carrier family 30 (zinc transporter), member 9
TWIST1	-0.0122891	0.533577	0	2	TWIST1_1105	pool12	0.507684	0.603935	0.411433	340.134	517.285	twist family bHLH transcription factor 1
DTX3L	-0.034187	0.512862	0	2	DTX3L_1591	pool12	0.506683	-2.33364	3.34701	7.59691	8.18307	deltex 3 like, E3 ubiquitin ligase
NFATC2	-0.100398	0.470698	0	1	NFATC2_2515	pool12	0.50627	0.0856651	0.926875	3460.2	4710.53	nuclear factor of activated T-cells, cytoplasmic, calcineurin-dependent 2
POLR2J	-0.0515381	0.650917	0	1	POLR2J_585	pool11	0.50625	0.453604	0.558897	5709.09	8104.64	polymerase (RNA) II (DNA directed) polypeptide J, 13.3kDa
GTSE1	-0.442493	-0.446602	0	0	GTSE1_1562	pool11	0.503159	-8.83083	9.83715	293.679	627.764	G2 and S-phase expressed 1
MYO6	-0.0397195	0.327164	0	1	MYO6_4289	pool12	0.502478	-0.901551	1.90651	554.164	552.754	myosin VI
NKX3-1	-2.30103	-1.99568	2	0	NKX3-1_2976	pool13	0.500854	0.605728	0.395981	2622.2	3783.12	NK3 homeobox 1
TOPORS	-0.00397017	0.32744	0	1	TOPORS_2852	pool12	0.500643	-0.283286	1.28457	511.447	421.296	topoisomerase I binding, arginine/serine-rich, E3 ubiquitin protein ligase
RAD9B	-0.175939	0.239879	0	2	RAD9B_198	pool12	0.499741	0.58648	0.413003	85.4138	128.672	RAD9 checkpoint clamp component B
RECQL5	-0.236797	-0.316683	1	0	RECQL5_139	pool12	0.499324	-0.368341	1.36699	2114.72	4932.79	RecQ like helicase 5
BLM	-0.00121773	0.927383	0	0	BLM_2919	pool11	0.499097	-0.0689108	1.06711	2653.93	4240.58	Bloom syndrome RecQ like helicase
C15orf42	-4	-0.966979	2	0	C15orf42_936	pool13	0.497403	-0.882459	1.87727	316.766	621.62
PSMB10	-0.203634	0.0143041	0	1	PSMB10_961	pool12	0.496721	1.06305	-0.0696038	1017.36	1462.4	proteasome subunit beta 10
CLOCK	-0.280337	-0.135311	0	0	CLOCK_300	pool13	0.493042	-0.856903	1.84299	2083.35	4363.27	clock circadian regulator
CRADD	-0.720561	-0.236422	0	0	CRADD_969	pool13	0.488493	0.382427	0.594559	671.158	939.806	CASP2 and RIPK1 domain containing adaptor with death domain
EYA2	-0.702896	-0.578232	1	0	EYA2_1195	pool11	0.48839	-3.58901	4.56579	107.076	389.885	EYA transcriptional coactivator and phosphatase 2
WNT1	-0.270592	-0.0574959	0	0	WNT1_2031	pool13	0.486911	-0.0518593	1.02568	1627.71	2637.24	wingless-type MMTV integration site family member 1
BRIP1	-0.0295137	0.29056	0	3	BRIP1_952	pool12	0.486794	-0.274004	1.24759	852.339	1318.95	BRCA1 interacting protein C-terminal helicase 1
MORF4L2	-0.216883	-0.048177	0	1	MORF4L2_1207	pool12	0.483604	-0.0287204	0.995928	137.029	134.816	mortality factor 4 like 2
EYA4	-0.0331077	0.056555	0	0	EYA4_639	pool12	0.482118	0.964237	0	139.234	272.125	EYA transcriptional coactivator and phosphatase 4
PSMB8	-0.476904	-0.618524	0	0	PSMB8_899	pool11	0.481039	-0.411383	1.37346	3340.33	4749.43	proteasome subunit beta 8
PSMB4	-0.289713	-0.0985962	0	0	PSMB4_401	pool11	0.478033	1.51646	-0.560398	2282.11	3338.83	proteasome subunit beta 4
POLR2K	-0.495257	-0.512862	0	0	POLR2K_226	pool13	0.476172	0.7753	0.177044	1395.38	1932.15	polymerase (RNA) II (DNA directed) polypeptide K, 7.0kDa
DMAP1	-1.40782	-0.776764	1	0	DMAP1_161	pool13	0.473965	0.539339	0.40859	125.187	171.371	DNA methyltransferase 1 associated protein 1
POLE	-0.105462	-0.32781	0	1	POLE_2661	pool12	0.47164	1.25495	-0.311666	770.879	1126.1	polymerase (DNA directed), epsilon, catalytic subunit
MMS22L	-4	-3.22185	2	0	MMS22L_5887	pool13	0.467026	-0.249657	1.18371	1783.81	2604.42	MMS22 like, DNA repair protein
GADD45G	-0.0355989	0.443818	0	1	GADD45G_1032	pool12	0.467026	-0.0410355	0.975087	2227.71	3187.22	growth arrest and DNA damage inducible gamma
ZRANB3	-0.351152	-0.664542	1	0	ZRANB3_2347	pool13	0.466401	-0.0796755	1.01248	309.533	434.483	zinc finger RANBP2-type containing 3
MNAT1	-0.334982	-0.15683	0	0	MNAT1_1063	pool13	0.464416	-0.633356	1.56219	2413.1	4110.69	MNAT CDK-activating kinase assembly factor 1
PYCARD	-0.0710412	0.130182	0	3	PYCARD_517	pool11	0.464175	-0.458349	1.3867	1422.55	2128.83	PYD and CARD domain containing
GTF2H2	-0.0456127	0.820448	0	0	GTF2H2_866	pool12	0.463652	0.624884	0.30242	952.314	1306.42	general transcription factor IIH subunit 2
SPDYA	-0.165897	-0.218963	0	1	SPDYA_634	pool12	0.462491	-0.34107	1.26605	520.114	803.382	speedy/RINGO cell cycle regulator family member A
PCNA	-0.0869283	0.0916759	0	1	PCNA_441	pool11	0.460294	-0.395487	1.31608	2031.85	3011.66	proliferating cell nuclear antigen
C9orf119	-0.0438796	0.560036	0	2	C9orf119_746	pool12	0.459562	0.507167	0.411957	300.575	427.548
ATAD5	-0.0242007	0.395774	1	3	ATAD5_2583	pool12	0.458936	0.917871	0	151.908	287.448	ATPase family, AAA domain containing 5
MBD4	-0.0204061	0.344958	0	2	MBD4_1432	pool11	0.45875	0.0893981	0.828102	1571.12	1995.26	methyl-CpG binding domain 4 DNA glycosylase
HERC2	-0.528708	-0.449772	1	0	HERC2_14534	pool13	0.458112	0	0.916223	10.4	20.0701	HECT and RLD domain containing E3 ubiquitin protein ligase 2
PSME4	-0.154964	-0.186686	0	0	PSME4_4180	pool11	0.457761	0.915522	0	12.3505	23.7392	proteasome activator subunit 4
ZBTB40	-1.47237	-1.03058	2	0	ZBTB40_2426	pool13	0.457028	-1.15778	2.07183	540.302	1383.12	zinc finger and BTB domain containing 40
PMAIP1	-0.280586	-0.0669685	0	0	PMAIP1_1106	pool11	0.45663	-0.307578	1.22084	626.749	1107.14	phorbol-12-myristate-13-acetate-induced protein 1
ZSWIM7	-0.364215	-1.86967	1	1	ZSWIM7_1493	pool13	0.45617	1.01782	-0.105483	177.756	256.074	zinc finger SWIM-type containing 7
HIC1	-2.40894	-0.940058	2	0	HIC1_2999	pool13	0.455211	-0.490311	1.40073	2055.52	2558.43	hypermethylated in cancer 1
ASCC3	-0.0653501	0.104467	0	0	ASCC3_465	pool11	0.453597	0.588585	0.31861	1656.17	2206.79	activating signal cointegrator 1 complex subunit 3
FANCL	-0.0739149	0.491605	1	1	FANCL_1111	pool12	0.450304	0.598614	0.301995	1902.2	2684.07	Fanconi anemia complementation group L
ING2	-0.0163286	0.532836	0	2	ING2_525	pool12	0.446832	0.919179	-0.0255144	2300.64	2840.03	inhibitor of growth family member 2
PPP2R5C	-0.0867691	0.107405	0	0	PPP2R5C_828	pool12	0.445356	1.05451	-0.163795	1374.27	1616.23	protein phosphatase 2 regulatory subunit B', gamma
IFI16	-0.281997	-0.166152	0	0	IFI16_52	pool11	0.444971	-7.26394	8.15389	76.3484	141.908	interferon, gamma-inducible protein 16
MCTS1	-0.120445	-0.20294	0	0	MCTS1_4468	pool13	0.444744	0.921674	-0.032186	1106.42	1479.29	malignant T-cell amplified sequence 1
PSMA4	-1.12321	-0.983384	0	0	PSMA4_436	pool11	0.44204	1.05169	-0.167612	3020.17	4089.46	proteasome subunit alpha 4
DGKZ	-0.431212	-0.404394	0	0	DGKZ_1346	pool13	0.441062	-0.105436	0.98756	328.599	494.902	diacylglycerol kinase zeta
APTX	-0.0734003	-0.104191	0	1	APTX_1264	pool12	0.439865	-1.05591	1.93564	595.129	732.141	aprataxin
RFC2	-0.59998	-0.437231	1	0	RFC2_956	pool11	0.438626	0.622506	0.254745	240.975	325.374	replication factor C subunit 2
POLL	-2.12494	-0.647625	2	0	POLL_1010	pool13	0.43794	0.548744	0.327136	317.509	440.368	polymerase (DNA directed), lambda
PPP2R5C	-0.0867691	0.107405	0	0	PPP2R5C_1151	pool12	0.433061	0.453119	0.413003	239.71	328.512	protein phosphatase 2 regulatory subunit B', gamma
NEK11	-0.00335701	0.38764	0	0	NEK11_208	pool12	0.431805	0.0260558	0.837554	2352.04	3145.83	NIMA related kinase 11
XRCC3	-0.114752	-0.200315	0	0	XRCC3_357	pool12	0.431452	1.44841	-0.58551	133.12	362.964	X-ray repair complementing defective repair in Chinese hamster cells 3
POLR2A	-1.10403	-1.1349	2	0	POLR2A_4323	pool13	0.429849	0.133309	0.726389	703.226	941.532	polymerase (RNA) II (DNA directed) polypeptide A, 220kDa
XPC	-0.0746879	0.182765	0	1	XPC_337	pool12	0.429602	0.56508	0.294123	1446.78	1995.02	xeroderma pigmentosum, complementation group C
GTF2H5	-0.452718	-0.552377	0	0	GTF2H5_4934	pool13	0.428241	1.08523	-0.228753	250.42	376.869	general transcription factor IIH subunit 5
STK11	-0.299816	-0.457673	0	0	STK11_1347	pool12	0.427766	1.12034	-0.264804	137.896	299.616	serine/threonine kinase 11
ASCC3	-0.0653501	0.104467	0	0	ASCC3_310	pool11	0.426383	0.692343	0.160423	739.566	1130.59	activating signal cointegrator 1 complex subunit 3
CCNA2	-0.0279824	0.0600317	0	2	CCNA2_1130	pool11	0.425649	0.403324	0.447975	1654.08	2218.38	cyclin A2
TRIP13	-1.27003	-0.957818	1	0	TRIP13_993	pool11	0.424877	0.343537	0.506216	873.071	1166.34	thyroid hormone receptor interactor 13
C19orf40	-0.168386	0.132238	0	1	C19orf40_616	pool12	0.424702	1.17362	-0.324215	223.375	503.32
NACC2	-0.673664	-1.09909	1	0	NACC2_1966	pool13	0.424294	-0.925015	1.7736	212.585	369.339	NACC family member 2
INO80C	-0.00252624	-0.189029	0	0	INO80C_492	pool13	0.421838	0.57698	0.266696	1764.93	2373.52	INO80 complex subunit C
CIDEB	-4	-1.00568	2	0	CIDEB_1175	pool13	0.421599	0.0259949	0.817203	1659.47	2444.8	cell death-inducing DFFA-like effector b
XPC	-0.0746879	0.182765	0	1	XPC_3483	pool12	0.42051	0.490563	0.350458	2050.38	2781.45	xeroderma pigmentosum, complementation group C
C19orf39	-0.141523	-0.0769115	1	1	C19orf39_787	pool12	0.41883	0.837661	0	2.20423	4.33286
HMGN1	-0.396964	-0.132768	0	0	HMGN1_607	pool11	0.41872	-0.419075	1.25651	3765.16	6051.07	high mobility group nucleosome binding domain 1
SIRT1	-0.0859214	0.120216	0	1	SIRT1_1713	pool13	0.418645	1.16792	-0.330631	3694.52	5638.98	sirtuin 1
EP300	-0.0192696	-0.000695428	1	0	EP300_4871	pool12	0.41781	-0.166899	1.00252	1763.67	2176.36	E1A binding protein p300
SMARCAD1	-0.869988	-0.527097	0	0	SMARCAD1_1401	pool12	0.415253	-0.898283	1.72879	1892.62	1683.09	SWI/SNF-related, matrix-associated actin-dependent regulator of chromatin, subfamily a, containing DEAD/H box 1
ERCC6	-0.286425	-2.14267	2	1	ERCC6_5340	pool13	0.415169	-0.42742	1.25776	2065.54	2811.04	excision repair cross-complementation group 6
SOD1	-0.0736061	-0.547294	1	1	SOD1_810	pool13	0.414857	0.293999	0.535715	769.305	1024.08	superoxide dismutase 1, soluble
PML	-0.285922	-0.135311	0	1	PML_1263	pool12	0.411972	0.604718	0.219225	155.162	236.117	promyelocytic leukemia
E2F1	-0.0204972	-0.704873	0	0	E2F1_1643	pool12	0.411876	1.40772	-0.583971	88.6023	235.243	E2F transcription factor 1
APEX2	-0.0588365	0.773916	0	2	APEX2_268	pool11	0.410784	0.800054	0.0215145	3014.86	3833.75	APEX nuclease (apurinic/apyrimidinic endonuclease) 2
POLB	-0.316683	-0.288024	0	0	POLB_583	pool13	0.40966	0	0.81932	0	0.382287	polymerase (DNA directed), beta
TRIM28	-0.0420577	0.692076	0	1	TRIM28_2588	pool11	0.408853	-0.82133	1.63904	270.484	840.995	tripartite motif containing 28
RPS27A	-0.259716	-0.0225965	0	1	RPS27A_477	pool12	0.406725	-9.22826	10.0417	427.149	1578.6	ribosomal protein S27a
MAEL	-0.524184	-0.880414	1	1	MAEL_645	pool13	0.402711	-0.285787	1.09121	304.877	435.71	maelstrom spermatogenic transposon silencer
APC	-0.738737	-1.18776	1	0	APC_358	pool13	0.402671	-0.184759	0.990101	2453.84	3486	adenomatous polyposis coli
TDP1	-0.00682839	-0.245422	1	1	TDP1_1736	pool12	0.401748	1.80201	-0.998513	40.3588	140.237	tyrosyl-DNA phosphodiesterase 1
POLR2I	-0.418733	-0.301551	0	0	POLR2I_596	pool13	0.39944	0.331822	0.467057	0	0.320444	polymerase (RNA) II (DNA directed) polypeptide I, 14.5kDa
DDB2	-0.561774	-0.404394	1	0	DDB2_328	pool11	0.397015	-0.903218	1.69725	149.043	195.35	damage specific DNA binding protein 2
SMG1	-0.0326861	0.446602	0	2	SMG1_1653	pool12	0.39611	0.379218	0.413003	74.3927	97.0739	SMG1 phosphatidylinositol 3-kinase-related kinase
CETN2	-0.250728	-1.30277	0	0	CETN2_379	pool11	0.396088	0.483354	0.308823	1743.54	2324.44	centrin 2
PTTG1	-0.356547	-0.073709	0	0	PTTG1_328	pool11	0.394601	0.165355	0.623848	3915.09	5189.95	pituitary tumor-transforming 1
UVRAG	-0.387428	-0.656986	0	0	UVRAG_3364	pool13	0.394054	-0.0562171	0.844325	2792.97	3900.8	UV radiation resistance associated
BCL2L1	-1.48945	-1.15864	1	0	BCL2L1_172	pool13	0.391152	0.448613	0.33369	276.92	361.776	BCL2 like 1
GTF2H2C	-0.0408155	0.56607	0	1	GTF2H2C_1787	pool13	0.390675	-0.0954665	0.876817	1617.96	1926.15	GTF2H2 family member C
OBFC2A	-0.000304113	0.287098	0	1	OBFC2A_861	pool12	0.390172	-0.653948	1.43429	426.27	685.667
FAM175A	-0.00100003	0.432974	0	2	FAM175A_2642	pool12	0.390038	1.36713	-0.587051	354.409	912.934	family with sequence similarity 175 member A
POLR2D	-0.0399099	0.742561	0	0	POLR2D_888	pool11	0.389389	5.30512	-4.52634	168.702	753.32	polymerase (RNA) II (DNA directed) polypeptide D
RBBP5	-0.045854	0.310247	0	0	RBBP5_3160	pool12	0.388908	0.780401	-0.00258485	737.262	1266.33	retinoblastoma binding protein 5
PSMB2	-0.00375109	0.402634	0	4	PSMB2_3260	pool12	0.387625	0.420248	0.355002	3224.54	4247.23	proteasome subunit beta 2
MRE11A	-0.139542	-0.163929	0	0	MRE11A_4497	pool12	0.38755	-0.220459	0.99556	659.681	566.908	MRE11 homolog A, double strand break repair nuclease
OBFC2A	-0.000304113	0.287098	0	1	OBFC2A_2571	pool12	0.38689	0.710581	0.0632002	592.599	801.087
HMGB1	-0.502241	-0.0548762	0	0	HMGB1_3100	pool11	0.386466	0.0427966	0.730136	7421.29	10265.4	high mobility group box 1
RAD1	-0.0856568	0.24504	0	1	RAD1_774	pool12	0.383844	0.354685	0.413003	126.008	161.433	RAD1 checkpoint DNA exonuclease
VAV3	-0.0357404	0.73189	0	1	VAV3_1729	pool12	0.381768	0.101955	0.66158	3063.12	4286.59	vav guanine nucleotide exchange factor 3
NDRG1	-1.06298	-0.250341	0	0	NDRG1_1955	pool13	0.380789	0.888808	-0.12723	2561.63	3769.81	N-myc downstream regulated 1
RAD50	-0.138346	-0.0128255	0	0	RAD50_2665	pool12	0.379224	-0.558448	1.31689	174.266	119.821	RAD50 double strand break repair protein
RBX1	-0.580209	-0.510886	1	1	RBX1_881	pool13	0.379011	-1.24773	2.00575	426.691	431.926	ring-box 1, E3 ubiquitin protein ligase
SETMAR	-0.0238794	-0.381638	0	0	SETMAR_877	pool13	0.378557	0.571327	0.185788	272.897	385.099	SET domain and mariner transposase fusion gene
TDP1	-0.00682839	-0.245422	1	1	TDP1_2049	pool12	0.378441	-0.525801	1.28268	1094.3	1140.11	tyrosyl-DNA phosphodiesterase 1
PSMB3	-0.0437355	0.120102	0	1	PSMB3_79	pool11	0.377524	0.755049	0	87.127	147.387	proteasome subunit beta 3
XRCC5	-4.34316e-05	0.54806	0	0	XRCC5_1984	pool12	0.377428	-0.241073	0.995928	468.215	396.584	X-ray repair complementing defective repair in Chinese hamster cells 5
UNG	-0.20412	-0.209082	0	1	UNG_1804	pool11	0.375826	0.285226	0.466426	728.282	954.92	uracil DNA glycosylase
POLE	-0.105462	-0.32781	0	1	POLE_2189	pool12	0.373934	0.334865	0.413003	15.0622	19.2937	polymerase (DNA directed), epsilon, catalytic subunit
AP5S1	-0.0522723	-0.0881502	0	1	AP5S1_1455	pool12	0.37344	1.33085	-0.583971	114.135	287.237	adaptor related protein complex 5 sigma 1 subunit
FAN1	-0.0378675	0.237997	0	1	FAN1_1392	pool13	0.371543	0.678933	0.0641539	253.65	343.959	FANCD2/FANCI-associated nuclease 1
MEN1	-4	-0.801343	1	0	MEN1_2654	pool13	0.371396	-1.04322	1.78602	1015.37	1338.99	menin 1
CLU	-0.0866631	0.181246	0	1	CLU_1848	pool12	0.368909	0.00435956	0.733459	684.113	885.138	clusterin
RFWD2	-0.041962	0.0045842	0	1	RFWD2_1297	pool12	0.367107	-0.369203	1.10342	996.716	1248.07	ring finger and WD repeat domain 2, E3 ubiquitin protein ligase
C19orf40	-0.168386	0.132238	0	1	C19orf40_618	pool12	0.36425	-0.851156	1.57966	231.575	130.358
TDG	-0.298259	-0.134481	1	0	TDG_1077	pool11	0.364171	0.469351	0.258991	10225.3	13093.2	thymine DNA glycosylase
RFC3	-0.593119	-0.567993	1	0	RFC3_258	pool12	0.363598	-0.0625306	0.789726	1002.64	1306.57	replication factor C subunit 3
PNKP	-0.119015	-0.730721	1	1	PNKP_521	pool12	0.361365	0.72273	0	12.6743	21.2416	polynucleotide kinase 3'-phosphatase
PYCARD	-0.0710412	0.130182	0	3	PYCARD_140	pool11	0.360178	6.4147	-5.69435	25.615	61.3142	PYD and CARD domain containing
BCL2	-0.438899	-0.341989	0	1	BCL2_219	pool13	0.359496	0.929893	-0.210901	677.003	934.913	B-cell CLL/lymphoma 2
UBA52	-0.568315	-0.427361	1	0	UBA52_1731	pool11	0.357075	-0.0564545	0.770604	17.9265	17.7113	ubiquitin A-52 residue ribosomal protein fusion product 1
ERCC4	-0.129596	-0.231066	1	0	ERCC4_626	pool12	0.356655	1.29882	-0.58551	168.755	414.852	excision repair cross-complementation group 4
BATF	-0.19942	-0.270511	1	1	BATF_839	pool13	0.356156	6.676	-5.96369	30.8848	69.0467	basic leucine zipper transcription factor, ATF-like
PLA2R1	-4	-1.11182	1	0	PLA2R1_4060	pool13	0.355187	-1.40127	2.11164	520.399	791.383	phospholipase A2 receptor 1
FANCE	-0.344477	-0.466609	0	0	FANCE_2461	pool11	0.354463	0.0662482	0.642679	1332.65	1702.69	Fanconi anemia complementation group E
PALB2	-1.44249	-0.408379	1	0	PALB2_539	pool11	0.352822	0.804455	-0.0988111	2759.81	3448.12	partner and localizer of BRCA2
TOP2A	-0.0578431	-0.0771708	1	1	TOP2A_4060	pool11	0.352139	0.704278	0	218.267	355.943	topoisomerase (DNA) II alpha
SPDYA	-0.165897	-0.218963	0	1	SPDYA_416	pool12	0.351583	0.0693999	0.633767	165.199	173.766	speedy/RINGO cell cycle regulator family member A
PSMA5	-0.24657	-0.0180456	0	1	PSMA5_1890	pool12	0.348685	1.28134	-0.583971	87.8675	213.684	proteasome subunit alpha 5
RUVBL2	-0.00104356	-0.732828	0	0	RUVBL2_1442	pool12	0.348143	0.283283	0.413003	137.029	167.034	RuvB-like AAA ATPase 2
PARP1	-0.0656531	0.230992	0	3	PARP1_1952	pool12	0.346808	-0.845503	1.53912	70.3544	48.0916	poly(ADP-ribose) polymerase 1
ASF1A	-0.0185438	0.292515	1	2	ASF1A_345	pool12	0.344208	0.688416	0	161.46	260.5	anti-silencing function 1A histone chaperone
ALKBH2	-0.095555	0.164944	0	1	ALKBH2_657	pool12	0.343074	1.27166	-0.58551	154.06	371.629	alkB homolog 2, alpha-ketoglutarate-dependent dioxygenase
VCP	-1.33913	-0.793174	1	0	VCP_3694	pool13	0.341587	0.930424	-0.24725	127.37	171.853	valosin containing protein
CEBPG	-0.129596	0.00309449	0	0	CEBPG_1404	pool11	0.335167	-0.0734613	0.743795	1647.49	2110.76	CCAAT/enhancer binding protein gamma
HIPK1	-0.603452	-0.632831	2	0	HIPK1_242	pool13	0.334724	0.837126	-0.167679	313.603	360.415	homeodomain interacting protein kinase 1
CDK7	-0.00572685	0.468904	0	2	CDK7_317	pool12	0.333798	0.256162	0.411433	211.37	252.769	cyclin-dependent kinase 7
POLR2G	-0.453211	-0.353302	0	0	POLR2G_391	pool11	0.333578	0.448238	0.218918	968.058	1198.95	polymerase (RNA) II (DNA directed) polypeptide G
MMS19	-1.25026	-2.79588	2	0	MMS19_207	pool13	0.333316	-0.416626	1.08326	178.93	250.02	MMS19 homolog, cytosolic iron-sulfur assembly component
NSMCE1	-0.0664621	0.0270108	1	1	NSMCE1_282	pool12	0.332738	0.836443	-0.170968	108.808	194.405	NSE1 homolog, SMC5-SMC6 complex component
TERF2	-0.473531	-0.37872	2	0	TERF2_1431	pool13	0.33201	1.28815	-0.624128	233.629	397.326	telomeric repeat binding factor 2
USP7	-4	-1.29243	3	0	USP7_4181	pool13	0.331838	0.205572	0.458104	2042.26	2569.58	ubiquitin specific peptidase 7 (herpes virus-associated)
EYA1	-0.400554	-0.263843	0	0	EYA1_2864	pool13	0.330611	6.73508	-6.07386	37.5043	513.325	EYA transcriptional coactivator and phosphatase 1
RDM1	-0.0507076	0.137392	0	0	RDM1_199	pool12	0.32942	0.65884	0	126.192	199.523	RAD52 motif containing 1
POLR2E	-0.0236042	0.298864	0	3	POLR2E_1226	pool12	0.328698	1.24291	-0.58551	185.47	438.63	polymerase (RNA) II (DNA directed) polypeptide E, 25kDa
INO80B	-0.432856	-0.480172	0	0	INO80B_291	pool13	0.326483	-0.109755	0.762721	1245.54	1547.99	INO80 complex subunit B
INO80C	-0.00252624	-0.189029	0	0	INO80C_918	pool13	0.32644	1.07577	-0.422895	481.802	608.837	INO80 complex subunit C
CHEK2	-0.185752	-0.136439	0	0	CHEK2_1743	pool11	0.325721	0.554456	0.0969869	779.756	970.64	checkpoint kinase 2
MCM8	-0.220548	-8.68676e-05	0	1	MCM8_3412	pool12	0.325186	-0.0205172	0.670889	2267.42	2861.79	minichromosome maintenance 8 homologous recombination repair factor
BRCA2	-0.428291	-0.286509	0	0	BRCA2_9024	pool11	0.324777	-0.327512	0.977065	2084.57	2774.45	breast cancer 2
BLM	-0.00121773	0.927383	0	0	BLM_925	pool11	0.321874	-0.453181	1.09693	2161.61	2429	Bloom syndrome RecQ like helicase
RAD21	-0.145269	-0.203148	0	0	RAD21_3497	pool13	0.32162	0.525583	0.117656	4055.08	4991.72	RAD21 cohesin complex component
RAD51	-0.840734	-0.407157	0	0	RAD51_1899	pool11	0.318863	0.22177	0.415955	2011.74	2503.14	RAD51 recombinase
CHAF1A	-0.0346572	-0.38637	0	0	CHAF1A_1140	pool12	0.318439	0.636878	0	125.825	195.93	chromatin assembly factor 1 subunit A
E2F1	-0.0204972	-0.704873	0	0	E2F1_1538	pool12	0.318329	1.22063	-0.583971	158.586	369.667	E2F transcription factor 1
NPM1	-0.280337	-0.562884	0	0	NPM1_409	pool11	0.316764	-0.137075	0.770604	12.0881	11.4488	nucleophosmin (nucleolar phosphoprotein B23, numatrin)
MGMT	-0.0635365	0.240861	0	0	MGMT_430	pool13	0.314601	1.1656	-0.536397	2949.89	3855.14	O-6-methylguanine-DNA methyltransferase
C9orf102	-0.0548762	-0.162285	1	0	C9orf102_3007	pool13	0.314215	-0.752378	1.38081	1274.77	2374.98
SMUG1	-0.144057	-0.332547	1	0	SMUG1_602	pool12	0.314194	-0.589349	1.21774	279.937	186.553	single-strand-selective monofunctional uracil-DNA glycosylase 1
POLD1	-0.0635868	0.454817	0	4	POLD1_2232	pool11	0.313167	0.656629	-0.0302943	408.343	526.59	polymerase (DNA directed), delta 1, catalytic subunit
MDM2	-0.248644	-0.0416751	0	1	MDM2_7294	pool12	0.311875	-8.89819	9.52194	238.057	367.086	MDM2 proto-oncogene, E3 ubiquitin protein ligase
ERCC4	-0.129596	-0.231066	1	0	ERCC4_1003	pool12	0.308268	0.203533	0.413003	157.97	182.146	excision repair cross-complementation group 4
PSMB9	-0.0898026	-0.0155627	1	1	PSMB9_450	pool11	0.306064	-1.29684	1.90897	919.746	1276.86	proteasome subunit beta 9
BAX	-0.36221	-0.208029	1	0	BAX_220	pool11	0.305225	1.35812	-0.747666	1292.4	1490.6	BCL2-associated X protein
NEK11	-0.00335701	0.38764	0	0	NEK11_728	pool12	0.304153	-0.0509234	0.659229	776.263	959.141	NIMA related kinase 11
ALKBH3	-0.0401957	0.552532	1	2	ALKBH3_598	pool12	0.303884	0.973009	-0.365242	352.205	690.539	alkB homolog 3, alpha-ketoglutarate-dependent dioxygenase
LIG4	-0.891435	-1.61979	2	0	LIG4_618	pool13	0.29908	0.41521	0.18295	564.784	700.996	ligase IV, DNA, ATP-dependent
TDP2	-4	-1.45717	2	0	TDP2_563	pool13	0.29796	0.678475	-0.0825546	365.596	453.911	tyrosyl-DNA phosphodiesterase 2
TOPORS	-0.00397017	0.32744	0	1	TOPORS_1644	pool12	0.295928	1.59005	-0.998191	1010.74	1151.3	topoisomerase I binding, arginine/serine-rich, E3 ubiquitin protein ligase
RBM38	-0.15422	0.304431	0	1	RBM38_1632	pool11	0.295897	0.127093	0.464701	0.411248	0.738938	RNA binding motif protein 38
CHAF1A	-0.0346572	-0.38637	0	0	CHAF1A_1374	pool12	0.291725	-0.0503164	0.633767	342.456	331.123	chromatin assembly factor 1 subunit A
PSMA4	-1.12321	-0.983384	0	0	PSMA4_263	pool11	0.289639	0.579279	0	0.224554	0.582558	proteasome subunit alpha 4
CDKN2A	-0.0163286	0.784891	0	1	CDKN2A_429	pool12	0.288152	-0.0808176	0.657122	1645.92	2095.89	cyclin-dependent kinase inhibitor 2A
RINT1	-1.10347	-1.41229	0	0	RINT1_2738	pool11	0.287659	1.23083	-0.655511	1514.56	1884.36	RAD50 interactor 1
DYRK2	-0.219035	-0.0952304	1	2	DYRK2_2562	pool12	0.285834	-1.71103	2.28269	1918.47	4015.62	dual specificity tyrosine phosphorylation regulated kinase 2
UBE2B	-0.34911	-0.214599	0	0	UBE2B_1967	pool13	0.285771	-1.43884	2.01039	625.764	1173.35	ubiquitin conjugating enzyme E2B
KIAA0101	-0.350373	-0.35047	1	0	KIAA0101_872	pool11	0.284271	1.02628	-0.457739	12.0881	24.7587	KIAA0101
ERCC1	-0.068593	-0.451856	0	0	ERCC1_123	pool11	0.283738	0.167984	0.399492	4017.43	4928.5	excision repair cross-complementation group 1
REV1	-0.120503	0.113284	0	0	REV1_3413	pool12	0.282292	0.564583	0	128.029	189.589	REV1, DNA directed polymerase
CHEK2	-0.185752	-0.136439	0	0	CHEK2_925	pool11	0.279196	-0.387732	0.946123	3990.72	5134.69	checkpoint kinase 2
SESN1	-4	-2.16115	3	1	SESN1_2021	pool13	0.277045	0.22726	0.32683	2531	3055.66	sestrin 1
RAD51L1	-0.099469	-0.881074	2	1	RAD51L1_834	pool12	0.276752	0.1405	0.413003	223.913	247.033
PSMA1	-0.235376	-3.39794	3	2	PSMA1_63	pool12	0.275985	0.436857	0.115113	2458.21	2866.49	proteasome subunit alpha 1
ASF1A	-0.0185438	0.292515	1	2	ASF1A_1286	pool12	0.27285	0.548284	-0.00258485	208.615	305.066	anti-silencing function 1A histone chaperone
MASTL	-0.0085524	0.43086	1	2	MASTL_1358	pool12	0.269687	0.710342	-0.170968	248.592	406.821	microtubule associated serine/threonine kinase like
MNAT1	-0.334982	-0.15683	0	0	MNAT1_511	pool13	0.268992	1.80312	-1.26513	383.483	652.19	MNAT CDK-activating kinase assembly factor 1
IER3	-0.183427	0.0629839	0	1	IER3_600	pool12	0.26838	0.123757	0.413003	232.546	253.585	immediate early response 3
HERC2	-0.528708	-0.449772	1	0	HERC2_8583	pool13	0.268358	0.0472195	0.489496	1440.87	1714.77	HECT and RLD domain containing E3 ubiquitin protein ligase 2
PLK1	-0.0237418	-0.00568285	0	1	PLK1_291	pool11	0.266861	0	0.533722	0	0.22383	polo like kinase 1
PLK1	-0.0237418	-0.00568285	0	1	PLK1_1189	pool11	0.266861	0	0.533722	0	0.22383	polo like kinase 1
UIMC1	-0.0734003	-0.286846	0	1	UIMC1_1315	pool11	0.266861	0	0.533722	0	0.22383	ubiquitin interaction motif containing 1
RECQL4	-0.41805	-0.312739	1	0	RECQL4_1337	pool11	0.266861	0	0.533722	0	0.22383	RecQ like helicase 4
POLE2	-0.439854	-0.321391	2	0	POLE2_1529	pool11	0.266861	0	0.533722	0	0.22383	polymerase (DNA directed), epsilon 2, accessory subunit
PPP4C	-1.30016	-0.37202	1	0	PPP4C_469	pool11	0.266861	0	0.533722	0	0.22383	protein phosphatase 4 catalytic subunit
SMC3	-0.0968557	-0.69229	1	1	SMC3_995	pool12	0.265033	1.11404	-0.583971	37.7214	81.6903	structural maintenance of chromosomes 3
YAP1	-0.106072	0.00828672	0	0	YAP1_3075	pool11	0.262404	0.0556266	0.469182	3387.51	4215.25	Yes associated protein 1
CUL4B	-0.0590853	-0.257825	0	2	CUL4B_520	pool11	0.261237	-0.195583	0.718058	2441.26	2672.46	cullin 4B
MSH2	-1.65956	-0.557363	2	0	MSH2_357	pool13	0.26117	0.686241	-0.163901	2221.05	2643.99	mutS homolog 2
INO80D	-0.225848	-0.0773264	0	0	INO80D_4417	pool13	0.257011	-0.997335	1.51136	956.422	1489.89	INO80 complex subunit D
MORF4L1	-0.294136	-0.415895	0	1	MORF4L1_366	pool13	0.25677	-0.112087	0.625626	82.3894	127.24	mortality factor 4 like 1
RPS27L	-0.0403386	0.653451	0	1	RPS27L_363	pool11	0.256405	-0.640185	1.15299	2830.51	4078.24	ribosomal protein S27 like
SPATA18	-1.51713	-0.559406	1	0	SPATA18_2431	pool13	0.255694	0.307883	0.203504	12998.2	15545.1	spermatogenesis associated 18
RBM38	-0.15422	0.304431	0	1	RBM38_2246	pool11	0.254236	0.764435	-0.255964	3709.63	4817.86	RNA binding motif protein 38
SMYD2	-0.293965	-0.0543837	0	1	SMYD2_1281	pool13	0.254042	-0.803171	1.31125	2320.34	3407.73	SET and MYND domain containing 2
CDK7	-0.00572685	0.468904	0	2	CDK7_911	pool12	0.253149	0.677266	-0.170968	440.728	704.837	cyclin-dependent kinase 7
DDX1	-0.884389	-0.731422	2	1	DDX1_463	pool13	0.252496	0.184205	0.320787	1358.16	1612.51	DEAD/H-box helicase 1
PSMB9	-0.0898026	-0.0155627	1	1	PSMB9_520	pool11	0.249479	-0.0166342	0.515592	203.998	203.598	proteasome subunit beta 9
FLJ35220	-0.242528	-0.778847	1	0	FLJ35220_64	pool13	0.247784	0.343156	0.152411	776.566	903.671
UBE2N	-0.080765	0.17192	0	0	UBE2N_2456	pool13	0.24544	0.812221	-0.321341	1148.35	1470.87	ubiquitin conjugating enzyme E2N
PSMF1	-0.458546	-0.288952	1	0	PSMF1_2760	pool11	0.245051	0.357095	0.133007	1688.33	1983.24	proteasome inhibitor subunit 1
PSMC4	-0.349692	-0.173407	1	1	PSMC4_852	pool11	0.243653	10.0661	-9.57883	895.385	536.188	proteasome 26S subunit, ATPase 4
CINP	-0.126796	0.172437	0	2	CINP_77	pool12	0.243239	0.073474	0.413003	129.131	136.07	cyclin-dependent kinase 2 interacting protein
PCBP4	-0.744004	-0.905529	2	0	PCBP4_1102	pool13	0.242482	0.705873	-0.220908	326.057	380.979	poly(rC) binding protein 4
MRPS9	-0.415556	-0.310425	2	0	MRPS9_294	pool13	0.239281	0.508395	-0.0298338	1109.78	1335.33	mitochondrial ribosomal protein S9
MSH2	-1.65956	-0.557363	2	0	MSH2_295	pool13	0.238765	-0.165743	0.643272	1598.83	2024.58	mutS homolog 2
CINP	-0.126796	0.172437	0	2	CINP_76	pool12	0.237619	0.646206	-0.170968	32.2108	50.4692	cyclin-dependent kinase 2 interacting protein
TTC5	-1.68825	-0.68424	2	0	TTC5_1732	pool13	0.236274	1.1562	-0.683651	429.612	662.54	tetratricopeptide repeat domain 5
POLD3	-0.000434512	-0.484789	0	0	POLD3_798	pool11	0.235843	0.495707	-0.0240214	1013.72	1204.44	polymerase (DNA-directed), delta 3, accessory subunit
BABAM1	-4	-1.17914	2	0	BABAM1_386	pool13	0.233571	-0.605366	1.07251	129.638	175.092	BRISC and BRCA1 A complex member 1
PSMD6	-0.705313	-0.595166	1	0	PSMD6_434	pool13	0.233529	0	0.467057	0	0.191143	proteasome 26S subunit, non-ATPase 6
DDB1	-2.14267	-1.25414	3	0	DDB1_852	pool13	0.233529	0	0.467057	0	0.191143	damage specific DNA binding protein 1
PSMD1	-1.10292	-1.2636	2	0	PSMD1_1967	pool13	0.233529	0	0.467057	0	0.191143	proteasome 26S subunit, non-ATPase 1
MCL1	-0.137094	-0.0408155	0	1	MCL1_767	pool11	0.232345	0.464691	0	25.8237	35.8273	myeloid cell leukemia 1
EYA3	-0.0544822	-0.267044	1	1	EYA3_5833	pool12	0.231399	0.0497945	0.413003	126.376	130.997	EYA transcriptional coactivator and phosphatase 3
RAD17	-0.4133	-0.663941	0	0	RAD17_541	pool12	0.228489	-0.0480897	0.505068	367.756	433.359	RAD17 checkpoint clamp loader component
TP53	-0.226945	-0.0992506	0	1	TP53_1026	pool11	0.22834	0.432784	0.0238955	1006.79	1204.07	tumor protein p53
GML	-1.5157	-1.84164	1	1	GML_390	pool13	0.227533	0.24974	0.205325	2348.97	2752.13	glycosylphosphatidylinositol anchored molecule like
TRIP12	-0.0758241	-0.274415	1	1	TRIP12_4215	pool12	0.226553	0.453105	0	87.2507	119.629	thyroid hormone receptor interactor 12
PSME2	-0.399027	-0.276216	0	0	PSME2_799	pool11	0.224928	0.16498	0.284876	2238.43	2606.79	proteasome activator subunit 2
PARP1	-0.0656531	0.230992	0	3	PARP1_3450	pool12	0.224226	0.358649	0.0898024	199.68	256.045	poly(ADP-ribose) polymerase 1
ZBTB32	-0.442613	-1.23136	2	0	ZBTB32_1886	pool13	0.223759	0.289477	0.158041	525.243	603.819	zinc finger and BTB domain containing 32
DDB2	-0.561774	-0.404394	1	0	DDB2_1784	pool11	0.222392	0.368801	0.0759826	0.186694	0.369469	damage specific DNA binding protein 2
RUVBL2	-0.00104356	-0.732828	0	0	RUVBL2_932	pool12	0.222161	0.444322	0	38.3903	52.417	RuvB-like AAA ATPase 2
BRSK1	-0.273599	-0.131591	1	0	BRSK1_2129	pool13	0.221896	1.2297	-0.785911	201.62	278.937	BR serine/threonine kinase 1
CDK9	-0.0521253	0.300336	1	1	CDK9_1880	pool12	0.220153	0.148628	0.291678	3981.99	4634.3	cyclin-dependent kinase 9
EME1	-0.170375	-0.128135	1	2	EME1_626	pool12	0.218357	1.65992	-1.2232	235.415	216.534	essential meiotic structure-specific endonuclease 1
UBE2V2	-1.78516	-0.882729	2	1	UBE2V2_257	pool13	0.218021	0.0700457	0.365997	2072.07	2417.67	ubiquitin conjugating enzyme E2 variant 2
IGHMBP2	-0.254067	-0.46801	2	1	IGHMBP2_2317	pool13	0.216834	6.61931	-6.18564	65.5218	226.142	immunoglobulin mu binding protein 2
DDX5	-0.0166895	0.0261336	0	1	DDX5_1392	pool12	0.215109	-0.316167	0.746385	1575.29	1715.55	DEAD-box helicase 5
POLR2D	-0.0399099	0.742561	0	0	POLR2D_859	pool11	0.212136	-0.813224	1.2375	292.556	167.294	polymerase (RNA) II (DNA directed) polypeptide D
CLU	-0.0866631	0.181246	0	1	CLU_1897	pool12	0.211991	-0.659439	1.08342	1256.56	1329.77	clusterin
PNKP	-0.119015	-0.730721	1	1	PNKP_678	pool12	0.209651	-2.15887	2.57817	63.5552	16.3299	polynucleotide kinase 3'-phosphatase
UBE2T	-0.475085	-1.22841	1	0	UBE2T_234	pool13	0.208193	-0.541143	0.95753	724.642	962.494	ubiquitin conjugating enzyme E2T
MLH3	-0.034422	0.0202241	0	1	MLH3_3300	pool12	0.20754	0.41508	0	177.808	237.251	mutL homolog 3
RAD50	-0.138346	-0.0128255	0	0	RAD50_5725	pool12	0.205218	-0.074383	0.484819	2516.6	3060.04	RAD50 double strand break repair protein
XRCC1	-0.208309	-0.0716041	0	2	XRCC1_197	pool12	0.205081	-0.00284189	0.413003	72.0048	72.0278	X-ray repair complementing defective repair in Chinese hamster cells 1
MUS81	-0.0147083	-0.465593	0	0	MUS81_468	pool11	0.205028	0.410056	0	22.4554	30.0017	MUS81 structure-specific endonuclease subunit
EME2	-0.680478	-1.58503	0	0	EME2_681	pool13	0.203861	0	0.407723	0.165079	0.382287	essential meiotic structure-specific endonuclease subunit 2
POLD4	-0.681311	-0.879755	0	0	POLD4_917	pool11	0.203754	-0.587478	0.994987	12613.7	16392.6	polymerase (DNA-directed), delta 4, accessory subunit
CLOCK	-0.280337	-0.135311	0	0	CLOCK_1337	pool13	0.202582	0.644586	-0.239421	1060.86	1210.42	clock circadian regulator
GTF2H4	-0.186086	-0.0368736	0	1	GTF2H4_449	pool11	0.201558	-0.538575	0.941691	495.357	663.429	general transcription factor IIH subunit 4
USP10	-0.181444	-0.370896	0	2	USP10_3127	pool13	0.199832	-0.0197618	0.419425	4147.37	4856.99	ubiquitin specific peptidase 10
PSMB4	-0.289713	-0.0985962	0	0	PSMB4_762	pool11	0.198302	1.54667	-1.15007	338.798	456.289	proteasome subunit beta 4
C9orf119	-0.0438796	0.560036	0	2	C9orf119_592	pool12	0.197311	0.46979	-0.0751685	426.576	588.109
GADD45G	-0.0355989	0.443818	0	1	GADD45G_106	pool12	0.197007	0.977985	-0.583971	378.091	744.724	growth arrest and DNA damage inducible gamma
ATRX	-2.10237	-0.928486	1	1	ATRX_6299	pool13	0.195	-0.336753	0.726752	641.058	781.098	alpha thalassemia/mental retardation syndrome X-linked
NSMCE4A	-0.202732	-0.148803	0	0	NSMCE4A_1336	pool12	0.192038	-0.744803	1.12888	2756.36	4012.84	NSE4 homolog A, SMC5-SMC6 complex component
EYA4	-0.0331077	0.056555	0	0	EYA4_1851	pool12	0.188804	-0.115699	0.493307	302.983	299.874	EYA transcriptional coactivator and phosphatase 4
TOPORS	-0.00397017	0.32744	0	1	TOPORS_1625	pool12	0.187981	0.392638	-0.0166759	1017.98	1183.88	topoisomerase I binding, arginine/serine-rich, E3 ubiquitin protein ligase
SGK1	-0.195929	-0.229958	1	0	SGK1_2115	pool12	0.187707	0.326286	0.0491286	4884.02	5450.56	serum/glucocorticoid regulated kinase 1
RAD18	-0.134541	-0.153168	1	2	RAD18_523	pool12	0.187675	-0.354041	0.729391	1786.57	2161.01	RAD18, E3 ubiquitin protein ligase
ALKBH8	-0.132709	0.315424	0	2	ALKBH8_2643	pool12	0.187153	0.376892	-0.00258485	661.216	858.615	alkB homolog 8, tRNA methyltransferase
EXO1	-0.310602	-0.359519	0	1	EXO1_577	pool11	0.185354	1.00974	-0.639033	636.155	725.408	exonuclease 1
RAD9A	-0.226872	-0.0956091	0	0	RAD9A_307	pool11	0.1844	0.368801	0	0	0.145639	RAD9 checkpoint clamp component A
BARD1	-0.0279361	-0.234108	0	0	BARD1_548	pool11	0.1844	0.368801	0	0	0.145639	BRCA1 associated RING domain 1
MSH6	-0.477165	-0.247107	0	0	MSH6_3222	pool11	0.1844	0.368801	0	0	0.145639	mutS homolog 6
MAPK1	-0.412289	-0.295163	2	0	MAPK1_1307	pool13	0.183623	2.14316	-1.77592	494.076	674.745	mitogen-activated protein kinase 1
NHEJ1	-0.563519	-0.753748	0	0	NHEJ1_2057	pool13	0.181606	-0.611945	0.975157	486.46	692.949	non-homologous end joining factor 1
OBFC2B	-0.0153827	-0.510886	0	0	OBFC2B_361	pool12	0.18083	1.60092	-1.23926	204.116	614.027
PSMD4	-0.23381	-0.437113	1	1	PSMD4_1177	pool13	0.179338	-0.5444	0.903076	1009.96	1250.58	proteasome 26S subunit, non-ATPase 4
MSH3	-0.22388	-1.79588	2	0	MSH3_1116	pool12	0.179209	-0.0545844	0.413003	128.213	123.599	mutS homolog 3
PAPD7	-0.0117087	-0.282163	1	1	PAPD7_396	pool13	0.178481	1.14597	-0.78901	573.232	662.75	PAP associated domain containing 7
HINFP	-4	-0.697453	2	1	HINFP_1501	pool13	0.177485	-0.112087	0.467057	0.180142	0.320444	histone H4 transcription factor
UBR5	-0.116963	-0.313096	0	0	UBR5_9802	pool11	0.177409	2.17365	-1.81883	12.6077	49.5956	ubiquitin protein ligase E3 component n-recognin 5
GNL1	-0.0742755	0.0536951	0	1	GNL1_6426	pool13	0.176409	-0.130093	0.482911	1670.4	1948.99	guanine nucleotide binding protein-like 1
MCM7	-0.240559	-0.10513	0	0	MCM7_880	pool11	0.174592	-0.267722	0.616907	163.265	165.324	minichromosome maintenance complex component 7
FANCD2	-0.297656	-0.117134	0	1	FANCD2_3854	pool12	0.17427	0.34854	0	57.4936	73.3416	Fanconi anemia complementation group D2
TREX1	-0.0404816	0.564156	0	2	TREX1_1274	pool12	0.173867	1.34625	-0.998513	135.324	343.564	three prime repair exonuclease 1
NEIL3	-0.303207	-0.228192	2	0	NEIL3_993	pool11	0.171251	0.586158	-0.243656	2493.04	3163.47	nei like DNA glycosylase 3
CDK7	-0.00572685	0.468904	0	2	CDK7_771	pool12	0.168093	-0.0768173	0.413003	92.7612	88.0911	cyclin-dependent kinase 7
POLN	-4	-1.20273	2	0	POLN_1606	pool13	0.165911	0.331822	0	0	0.129301	polymerase (DNA directed) nu
ERCC1	-0.068593	-0.451856	0	0	ERCC1_561	pool11	0.165107	1.11397	-0.783755	451.682	386.124	excision repair cross-complementation group 1
MAPKAPK2	-0.0975076	0.388489	1	2	MAPKAPK2_2991	pool12	0.16445	-0.0441461	0.373047	2301.12	2661.69	mitogen-activated protein kinase-activated protein kinase 2
C17orf70	-0.0842309	-0.244278	0	1	C17orf70_1420	pool12	0.160392	0.491753	-0.170968	131.401	184.788
MAP2K6	-1.37469	-1.26841	1	0	MAP2K6_1566	pool13	0.159512	0.240579	0.0784465	1519.78	1690.7	mitogen-activated protein kinase kinase 6
SETMAR	-0.0238794	-0.381638	0	0	SETMAR_856	pool13	0.158277	-0.630649	0.947204	1859.5	2617.82	SET domain and mariner transposase fusion gene
CDK7	-0.00572685	0.468904	0	2	CDK7_894	pool12	0.154294	0.311173	-0.00258485	111.812	138.726	cyclin-dependent kinase 7
IRF3	-0.0085524	0.125055	1	1	IRF3_324	pool12	0.154216	-0.104571	0.413003	545.546	507.533	interferon regulatory factor 3
ACTR8	-0.179339	-1.06098	0	0	ACTR8_826	pool12	0.154214	0.479396	-0.170968	64.5395	89.9933	ARP8 actin-related protein 8 homolog (yeast)
PTPN11	-0.649364	-0.260032	0	0	PTPN11_2403	pool13	0.152055	0.798995	-0.494886	918.698	1112.24	protein tyrosine phosphatase, non-receptor type 11
CDK9	-0.0521253	0.300336	1	1	CDK9_326	pool12	0.151677	0.660962	-0.357607	1490.62	1746.4	cyclin-dependent kinase 9
POLK	-0.0439277	-0.708853	0	1	POLK_3212	pool13	0.149747	0.337069	-0.0375744	378.273	426.539	polymerase (DNA directed) kappa
RAD52	-0.0269646	-0.209012	0	1	RAD52_2400	pool12	0.148373	-0.436964	0.733709	434.233	320.963	RAD52 homolog, DNA repair protein
MYC	-0.0297461	-0.164627	0	2	MYC_1715	pool11	0.144884	-1.28167	1.57144	555.246	1055.18	v-myc avian myelocytomatosis viral oncogene homolog
PSME2	-0.399027	-0.276216	0	0	PSME2_457	pool11	0.143011	0.383705	-0.0976835	1010.36	1136.93	proteasome activator subunit 2
HMGA2	-0.869666	-0.518844	0	0	HMGA2_232	pool13	0.142793	-0.181471	0.467057	0.360285	0.449745	high mobility group AT-hook 2
NFATC2	-0.100398	0.470698	0	1	NFATC2_1833	pool12	0.14222	0.261295	0.0231452	10680.5	11726.6	nuclear factor of activated T-cells, cytoplasmic, calcineurin-dependent 2
LYN	-0.050854	0.453087	0	2	LYN_1428	pool11	0.140427	-0.700702	0.981556	48.3875	32.3504	LYN proto-oncogene, Src family tyrosine kinase
PAPD7	-0.0117087	-0.282163	1	1	PAPD7_2063	pool13	0.137342	0.780418	-0.505734	628.542	724.011	PAP associated domain containing 7
ALKBH8	-0.132709	0.315424	0	2	ALKBH8_2484	pool12	0.137104	0.286684	-0.0124754	5371.71	5844.84	alkB homolog 8, tRNA methyltransferase
ERCC1	-0.068593	-0.451856	0	0	ERCC1_384	pool11	0.136878	0.273756	0	111.828	135.299	excision repair cross-complementation group 1
SGK1	-0.195929	-0.229958	1	0	SGK1_832	pool12	0.136574	-0.139855	0.413003	60.2489	54.802	serum/glucocorticoid regulated kinase 1
CDKN1B	-0.162475	-0.503209	0	0	CDKN1B_943	pool12	0.135637	-0.141729	0.413003	206.646	187.43	cyclin-dependent kinase inhibitor 1B (p27, Kip1)
DDIT3	-0.0311436	-0.503901	0	0	DDIT3_113	pool12	0.134985	-0.947768	1.21774	244.669	127.267	DNA damage inducible transcript 3
LIG1	-0.391046	-0.167363	0	0	LIG1_3048	pool11	0.133588	-2.02939	2.29656	859.41	2531.95	ligase I, DNA, ATP-dependent
RPAIN	-0.0450824	-1.29499	0	0	RPAIN_441	pool12	0.132629	-0.147746	0.413003	50.5135	45.7136	RPA interacting protein
RPS6KA6	-1.14267	-0.445753	1	0	RPS6KA6_949	pool13	0.132609	-0.132341	0.397558	1706.47	1983.95	ribosomal protein S6 kinase, 90kDa, polypeptide 6
MUM1	-0.0594337	-0.048274	1	0	MUM1_596	pool12	0.127133	-0.3795	0.633767	358.804	276.169	melanoma associated antigen (mutated) 1
ZAK	-0.637706	-0.517984	1	0	ZAK_1120	pool12	0.126924	-0.378592	0.63244	669.512	519.427
ZRANB3	-0.351152	-0.664542	1	0	ZRANB3_563	pool13	0.123341	0.30197	-0.0552888	786.44	851.476	zinc finger RANBP2-type containing 3
FANCI	-0.336488	-0.405386	1	0	FANCI_704	pool11	0.121752	-0.565237	0.808742	1417.81	1730.51	Fanconi anemia complementation group I
BAG6	-0.183427	-0.0318441	0	0	BAG6_453	pool12	0.121662	0.307343	-0.0640198	1303.88	1337.3	BCL2 associated athanogene 6
XRCC5	-4.34316e-05	0.54806	0	0	XRCC5_3136	pool12	0.119614	-1.25678	1.49601	1363.27	2476.29	X-ray repair complementing defective repair in Chinese hamster cells 5
MSH3	-0.22388	-1.79588	2	0	MSH3_2502	pool12	0.118143	-0.497423	0.733709	86.8833	61.7313	mutS homolog 3
CDK2	-0.394803	-0.196065	0	1	CDK2_1948	pool11	0.115398	-1.08497	1.31576	2139.55	2892.76	cyclin-dependent kinase 2
NEK1	-0.844057	-2.27572	2	0	NEK1_4015	pool13	0.111437	-1.03934	1.26221	162.494	226.594	NIMA related kinase 1
FANCB	-0.815309	-1.92812	1	0	FANCB_2400	pool13	0.110385	-1.31332	1.53409	902.827	1453.17	Fanconi anemia complementation group B
MYC	-0.0297461	-0.164627	0	2	MYC_598	pool11	0.110037	2.23579	-2.01571	2.65158	3.13662	v-myc avian myelocytomatosis viral oncogene homolog
POLR2D	-0.0399099	0.742561	0	0	POLR2D_889	pool11	0.108706	0.0254635	0.191949	6899.86	7452.25	polymerase (RNA) II (DNA directed) polypeptide D
MRPS26	-0.15658	-0.0535477	0	1	MRPS26_882	pool12	0.103183	-1.07561	1.28197	543.113	501.807	mitochondrial ribosomal protein S26
MSH5	-0.401866	-0.37059	0	0	MSH5_451	pool13	0.102865	0.506112	-0.300383	1977.31	2101.63	mutS homolog 5
KAT5	-0.34727	-0.322849	1	0	KAT5_2044	pool13	0.10217	0.500566	-0.296226	3277.56	3833.8	lysine acetyltransferase 5
PCNA	-0.0869283	0.0916759	0	1	PCNA_442	pool11	0.0949336	0.445677	-0.25581	1084.19	1140	proliferating cell nuclear antigen
FANCM	-0.0503173	-0.16698	0	1	FANCM_7089	pool12	0.0927202	0.18544	0	106.905	121.637	Fanconi anemia complementation group M
RAD50	-0.138346	-0.0128255	0	0	RAD50_4381	pool12	0.0917979	-0.228361	0.411957	330.149	282.027	RAD50 double strand break repair protein
NFRKB	-0.0143939	0.493766	0	2	NFRKB_4158	pool12	0.0896573	0.0310324	0.148282	1160.24	1185.62	nuclear factor related to kappaB binding protein
FANCB	-0.815309	-1.92812	1	0	FANCB_1869	pool13	0.0895494	-0.326731	0.50583	657.321	739.435	Fanconi anemia complementation group B
LIG4	-0.891435	-1.61979	2	0	LIG4_439	pool13	0.0895246	-0.188525	0.367574	4397.34	4700.85	ligase IV, DNA, ATP-dependent
APEX1	-0.254223	-0.246494	0	0	APEX1_496	pool11	0.0864898	-0.297883	0.470863	7471.75	8267.1	APEX nuclease (multifunctional DNA repair enzyme) 1
NSMCE2	-0.223444	-0.200935	0	0	NSMCE2_468	pool12	0.0847979	-0.805113	0.974709	371.435	438.037	NSE2/MMS21 homolog, SMC5-SMC6 complex SUMO ligase
FBXO31	-0.115148	0.0699684	0	1	FBXO31_382	pool12	0.0820938	-0.248816	0.413003	30.8592	26.0572	F-box protein 31
POLA1	-0.415217	-0.261457	0	0	POLA1_1642	pool11	0.0814528	2.61725	-2.45435	5.8332	24.6131	polymerase (DNA directed), alpha 1, catalytic subunit
POLB	-0.316683	-0.288024	0	0	POLB_589	pool13	0.0791186	0.398583	-0.240346	1469.11	1710.64	polymerase (DNA directed), beta
FAM175A	-0.00100003	0.432974	0	2	FAM175A_799	pool12	0.0786803	0.328329	-0.170968	87.6838	110.072	family with sequence similarity 175 member A
ASTE1	-0.0257186	-0.14315	0	0	ASTE1_2308	pool11	0.0772883	0.545123	-0.390547	6370.46	7069.1	asteroid homolog 1 (Drosophila)
PPP4R2	-1.47237	-1.86328	0	0	PPP4R2_376	pool13	0.0742208	-1.14124	1.28968	2367.9	3701.55	protein phosphatase 4 regulatory subunit 2
FANCE	-0.344477	-0.466609	0	0	FANCE_2259	pool11	0.0740165	0.605772	-0.457739	55.427	84.3253	Fanconi anemia complementation group E
MAPK14	-0.176461	-0.289544	0	1	MAPK14_692	pool12	0.0733211	0.730614	-0.583971	113.032	187.475	mitogen-activated protein kinase 14
CDKN2D	-0.125634	-0.0576942	0	1	CDKN2D_961	pool13	0.072885	-0.459021	0.604791	562.557	707.161	cyclin-dependent kinase inhibitor 2D (p19, inhibits CDK4)
GRB2	-0.144299	0.0257647	0	0	GRB2_508	pool13	0.0727521	0.122054	0.0234499	1774.76	1877.97	growth factor receptor bound protein 2
RHNO1	-0.00370728	0.396423	0	2	RHNO1_890	pool12	0.0713795	-0.85923	1.00199	630.397	734.899	RAD9-HUS1-RAD1 interacting nuclear orphan 1
MLH3	-0.034422	0.0202241	0	1	MLH3_2720	pool12	0.0711434	0.193615	-0.0513278	3554.58	3735.52	mutL homolog 3
RPAIN	-0.0450824	-1.29499	0	0	RPAIN_739	pool12	0.0708125	0.536909	-0.395284	269.796	390.68	RPA interacting protein
RPS27A	-0.259716	-0.0225965	0	1	RPS27A_282	pool12	0.0703608	0.485832	-0.345111	1580.02	1900.68	ribosomal protein S27a
RPAIN	-0.0450824	-1.29499	0	0	RPAIN_231	pool12	0.0702131	0.140426	0	51.2483	56.5386	RPA interacting protein
RNF169	-0.0339052	0.338945	0	2	RNF169_4502	pool12	0.0693704	0.138741	0	58.412	64.3588	ring finger protein 169
INTS7	-0.185486	-0.0230085	0	1	INTS7_2318	pool12	0.0691151	1.13674	-0.998513	273.456	600.788	integrator complex subunit 7
CEP63	-4	-0.787812	2	0	CEP63_1246	pool13	0.0664063	0.556654	-0.423841	1297.47	1344.95	centrosomal protein 63kDa
FANCA	-0.00722564	0.373968	0	0	FANCA_237	pool12	0.0663547	-0.280294	0.413003	57.861	47.7215	Fanconi anemia complementation group A
NEK11	-0.00335701	0.38764	0	0	NEK11_1608	pool12	0.0658132	-0.28033	0.411957	590.615	486.517	NIMA related kinase 11
EYA1	-0.400554	-0.263843	0	0	EYA1_27	pool13	0.0647038	1.07267	-0.943265	739.212	934.636	EYA transcriptional coactivator and phosphatase 1
SMUG1	-0.144057	-0.332547	1	0	SMUG1_1303	pool12	0.0645619	0.294255	-0.165131	1472.36	1670.31	single-strand-selective monofunctional uracil-DNA glycosylase 1
NEIL3	-0.303207	-0.228192	2	0	NEIL3_1471	pool11	0.0630887	0.113754	0.0124235	2768.5	2894.57	nei like DNA glycosylase 3
FOXN3	-0.15789	0.169475	0	2	FOXN3_592	pool12	0.0623423	0.295653	-0.170968	658.028	807.663	forkhead box N3
DNAJA1	-0.12907	-0.565591	1	0	DNAJA1_778	pool13	0.0578185	6.88768	-6.77204	54.326	80.0373	DnaJ heat shock protein family (Hsp40) member A1
BRIP1	-0.0295137	0.29056	0	3	BRIP1_1469	pool12	0.0524741	0.269975	-0.165027	1219.46	1160.51	BRCA1 interacting protein C-terminal helicase 1
POLR2J	-0.0515381	0.650917	0	1	POLR2J_916	pool11	0.0522124	0.265726	-0.161301	511.147	513.704	polymerase (RNA) II (DNA directed) polypeptide J, 13.3kDa
PSMB5	-4	-1.23657	3	1	PSMB5_771	pool13	0.0505238	0.0455875	0.05546	0.525364	0.579046	proteasome subunit beta 5
EME2	-0.680478	-1.58503	0	0	EME2_85	pool13	0.0496394	-1.23299	1.33227	274.665	465.524	essential meiotic structure-specific endonuclease subunit 2
GEN1	-0.0394817	0.711527	0	2	GEN1_2214	pool12	0.0494702	-0.0424084	0.141349	4961.81	5151.64	GEN1, Holliday junction 5' flap endonuclease
PLK3	-0.222138	-1.284	0	1	PLK3_1157	pool11	0.0489227	-0.0886533	0.186499	602.436	640.13	polo like kinase 3
TIPIN	-0.397289	-0.164246	1	1	TIPIN_757	pool11	0.0474451	-1.14122	1.23611	2437.55	2841.09	TIMELESS interacting protein
ING2	-0.0163286	0.532836	0	2	ING2_506	pool12	0.0458255	-0.678934	0.770585	630.098	686.179	inhibitor of growth family member 2
UIMC1	-0.0734003	-0.286846	0	1	UIMC1_2244	pool11	0.045718	0.658967	-0.567531	587.085	675.248	ubiquitin interaction motif containing 1
SIRT1	-0.0859214	0.120216	0	1	SIRT1_1851	pool13	0.0442952	-0.19778	0.286371	1944.75	2115.27	sirtuin 1
UPF1	-0.212115	-0.0594337	0	1	UPF1_567	pool12	0.0439149	-0.325173	0.413003	32.696	26.1629	UPF1 regulator of nonsense transcripts homolog (yeast)
ZBTB32	-0.442613	-1.23136	2	0	ZBTB32_660	pool13	0.0416292	-1.965	2.04825	1707.69	2432.45	zinc finger and BTB domain containing 32
XRCC4	-0.42934	-0.301465	0	0	XRCC4_598	pool11	0.0412373	-2.34349	2.42596	436.116	184.363	X-ray repair complementing defective repair in Chinese hamster cells 4
NEIL2	-4	-0.877784	2	0	NEIL2_1314	pool13	0.040914	0.0643714	0.0174565	370.25	380.457	nei like DNA glycosylase 2
POLN	-4	-1.20273	2	0	POLN_54	pool13	0.0351252	0.470041	-0.399791	555.805	600.769	polymerase (DNA directed) nu
TP63	-0.733298	-0.718739	0	0	TP63_866	pool13	0.032557	0.150358	-0.0852438	354.489	352.793	tumor protein p63
UBA52	-0.568315	-0.427361	1	0	UBA52_1461	pool11	0.0321219	-0.0901442	0.154388	5163.19	5281.63	ubiquitin A-52 residue ribosomal protein fusion product 1
PSMB6	-0.140501	-0.201004	0	1	PSMB6_385	pool12	0.0311331	-0.156959	0.219225	656.257	588.77	proteasome subunit beta 6
RAD51L3	-0.819587	-0.721475	1	0	RAD51L3_1645	pool13	0.0307792	-0.112148	0.173707	4306.91	4342.5
UCHL5	-1.32331	-0.574955	2	0	UCHL5_939	pool13	0.0281977	0.466949	-0.410554	344.266	352.904	ubiquitin C-terminal hydrolase L5
SMC6	-0.372942	-0.19942	0	1	SMC6_1189	pool11	0.0274948	7.16596	-7.11097	130.724	103.997	structural maintenance of chromosomes 6
C12orf48	-0.175419	0.174574	0	2	C12orf48_2774	pool12	0.0247674	0.0495349	0	90.557	93.7377
ERCC8	-0.37789	-0.147276	0	1	ERCC8_618	pool11	0.0222435	0.044487	0	70.7346	72.9654	excision repair cross-complementation group 8
RBBP5	-0.045854	0.310247	0	0	RBBP5_3255	pool12	0.0215485	-0.204976	0.248073	3055.35	2978.73	retinoblastoma binding protein 5
NSMCE2	-0.223444	-0.200935	0	0	NSMCE2_638	pool12	0.0204212	0.624814	-0.583971	28.7208	44.174	NSE2/MMS21 homolog, SMC5-SMC6 complex SUMO ligase
GADD45G	-0.0355989	0.443818	0	1	GADD45G_995	pool12	0.0189207	0.343862	-0.306021	690.755	781.973	growth arrest and DNA damage inducible gamma
XRCC4	-0.42934	-0.301465	0	0	XRCC4_374	pool11	0.0179637	5.7652	-5.72927	38.348	51.3433	X-ray repair complementing defective repair in Chinese hamster cells 4
EPHA2	-0.0268259	0.0695604	0	1	EPHA2_501	pool11	0.0171267	5.80155	-5.7673	225.385	231.361	EPH receptor A2
SNW1	-0.274252	-0.00256993	0	0	SNW1_658	pool12	0.0145613	-1.53195	1.56108	1717.21	2056.08	SNW domain containing 1
NTHL1	-0.773658	-0.380489	1	0	NTHL1_1031	pool13	0.0117982	0.605333	-0.581737	1987.03	2127.56	nth-like DNA glycosylase 1
KIAA2022	-0.80827	-0.442733	1	0	KIAA2022_5080	pool13	0.0105985	-0.278273	0.29947	2128.6	2208.82	KIAA2022
DTL	-0.0286314	-1.49894	0	0	DTL_2710	pool11	0.00904515	-0.549417	0.567507	5691.77	6049.79	denticleless E3 ubiquitin protein ligase homolog
FANCC	-0.0584886	-0.0715529	0	1	FANCC_3071	pool12	0.00710636	0.426053	-0.411841	2995.82	2700.81	Fanconi anemia complementation group C
PSMD7	-0.0518316	0.439376	0	1	PSMD7_370	pool12	0.00503101	-0.723647	0.733709	321.082	194.57	proteasome 26S subunit, non-ATPase 7
CCNH	-1.07831	-0.397072	1	0	CCNH_360	pool13	0.00298333	0.104917	-0.0989507	2161.87	2172.72	cyclin H
FOXO1	-0.0662597	0.123147	0	0	FOXO1_3704	pool12	0.00154335	0.587058	-0.583971	247.858	372.203	forkhead box O1
NKX3-1	-2.30103	-1.99568	2	0	NKX3-1_3170	pool13	0.00115902	1.63258	-1.63026	87.7628	169.666	NK3 homeobox 1
WRNIP1	-0.0544822	1.06651	0	2	WRNIP1_1484	pool12	0.000440502	1.00272	-1.00184	330.662	660.572	Werner helicase interacting protein 1
POLR2J	-0.0515381	0.650917	0	1	POLR2J_563	pool11	0	0	0	0	0	polymerase (RNA) II (DNA directed) polypeptide J, 13.3kDa
PSMA7	-0.000130308	0.462559	0	2	PSMA7_451	pool11	0	0	0	0	0	proteasome subunit alpha 7
PSMA7	-0.000130308	0.462559	0	2	PSMA7_633	pool11	0	0	0	0	0	proteasome subunit alpha 7
NEK11	-0.00335701	0.38764	0	0	NEK11_1191	pool12	0	0	0	0	0	NIMA related kinase 11
PSMB3	-0.0437355	0.120102	0	1	PSMB3_70	pool11	0	0	0	0	0	proteasome subunit beta 3
PCNA	-0.0869283	0.0916759	0	1	PCNA_511	pool11	0	0	0	0	0	proliferating cell nuclear antigen
CEBPG	-0.129596	0.00309449	0	0	CEBPG_527	pool11	0	0	0	0	0	CCAAT/enhancer binding protein gamma
PLK1	-0.0237418	-0.00568285	0	1	PLK1_900	pool11	0	0	0	0	0	polo like kinase 1
POLG2	-0.196543	-0.0180003	0	1	POLG2_559	pool11	0	0	0	0	0	polymerase (DNA directed), gamma 2, accessory subunit
RAD9A	-0.226872	-0.0956091	0	0	RAD9A_1749	pool11	0	0	0	0	0	RAD9 checkpoint clamp component A
PSMB4	-0.289713	-0.0985962	0	0	PSMB4_758	pool11	0	0	0	0	0	proteasome subunit beta 4
POLI	-0.197774	-0.139363	0	0	POLI_5098	pool11	0	0	0	0	0	polymerase (DNA directed) iota
SMARCA5	-0.422738	-0.184887	0	0	SMARCA5_3186	pool11	0	0	0	0	0	SWI/SNF related, matrix associated, actin dependent regulator of chromatin, subfamily a, member 5
BARD1	-0.0279361	-0.234108	0	0	BARD1_543	pool11	0	0	0	0	0	BRCA1 associated RING domain 1
BRCA2	-0.428291	-0.286509	0	0	BRCA2_10453	pool11	0	0	0	0	0	breast cancer 2
PARP3	-0.301986	-0.288699	0	1	PARP3_2005	pool11	0	0	0	0	0	poly(ADP-ribose) polymerase family member 3
SP100	-0.0332483	-0.322667	0	0	SP100_514	pool11	0	0	0	0	0	SP100 nuclear antigen
PSMD13	-0.0800855	-0.353204	1	1	PSMD13_621	pool11	0	0	0	0	0	proteasome 26S subunit, non-ATPase 13
PSMD13	-0.0800855	-0.353204	1	1	PSMD13_1429	pool11	0	0	0	0	0	proteasome 26S subunit, non-ATPase 13
NEK6	-0.674074	-0.360912	0	0	NEK6_699	pool12	0	0	0	0	0	NIMA related kinase 6
PPP4C	-1.30016	-0.37202	1	0	PPP4C_819	pool11	0	0	0	0	0	protein phosphatase 4 catalytic subunit
SETMAR	-0.0238794	-0.381638	0	0	SETMAR_603	pool13	0	0	0	0	0	SET domain and mariner transposase fusion gene
SFPQ	-0.708409	-0.396206	0	0	SFPQ_1022	pool11	0	0	0	0	0	splicing factor proline/glutamine-rich
FANCI	-0.336488	-0.405386	1	0	FANCI_3191	pool11	0	0	0	0	0	Fanconi anemia complementation group I
PALB2	-1.44249	-0.408379	1	0	PALB2_2840	pool11	0	0	0	0	0	partner and localizer of BRCA2
PRKDC	-0.582362	-0.433209	0	0	PRKDC_7287	pool11	0	0	0	0	0	protein kinase, DNA-activated, catalytic polypeptide
RPA1	-0.25602	-0.452471	1	1	RPA1_1652	pool11	0	0	0	0	0	replication protein A1
XRCC6	-0.210278	-0.523458	0	0	XRCC6_563	pool12	0	0	0	0	0	X-ray repair complementing defective repair in Chinese hamster cells 6
DNAJA1	-0.12907	-0.565591	1	0	DNAJA1_172	pool13	0	0	0	0	0	DnaJ heat shock protein family (Hsp40) member A1
FLJ35220	-0.242528	-0.778847	1	0	FLJ35220_398	pool13	0	0	0	0	0
FLJ35220	-0.242528	-0.778847	1	0	FLJ35220_427	pool13	0	0	0	0	0
OTUB1	-4	-0.788079	1	0	OTUB1_702	pool13	0	0	0	0	0	OTU deubiquitinase, ubiquitin aldehyde binding 1
PSMA8	-0.668775	-0.940437	1	0	PSMA8_517	pool13	0	0	0	0	0	proteasome subunit alpha 8
INO80	-0.939302	-1.03527	0	0	INO80_474	pool13	0	0	0	0	0	INO80 complex subunit
PLK3	-0.222138	-1.284	0	1	PLK3_1496	pool11	0	0	0	0	0	polo like kinase 3
MMS19	-1.25026	-2.79588	2	0	MMS19_2540	pool13	0	0	0	0	0	MMS19 homolog, cytosolic iron-sulfur assembly component
IRF7	-0.0154727	-0.223807	0	1	IRF7_1325	pool11	-0.000721729	-0.535166	0.533722	0.224554	0.22383	interferon regulatory factor 7
AEN	-0.756962	-0.526513	0	0	AEN_2648	pool11	-0.000721729	-0.535166	0.533722	0.224554	0.22383	apoptosis enhancing nuclease
GADD45A	-0.0488568	-0.60415	0	1	GADD45A_635	pool11	-0.000721729	-0.535166	0.533722	0.224554	0.22383	growth arrest and DNA damage inducible alpha
CHD1L	-0.121536	-0.344862	1	1	CHD1L_1814	pool11	-0.00113694	0.0738188	-0.0760927	1338.77	1331.41	chromodomain helicase DNA binding protein 1-like
FEN1	-0.0198148	0.677161	0	2	FEN1_2084	pool12	-0.00157618	0.580819	-0.583971	99.0724	148.057	flap structure-specific endonuclease 1
PSMA8	-0.668775	-0.940437	1	0	PSMA8_681	pool13	-0.00465106	-1.72319	1.71388	432.485	767.822	proteasome subunit alpha 8
REV1	-0.120503	0.113284	0	0	REV1_4313	pool12	-0.00495683	-1.4005	1.39059	1363.79	2277.07	REV1, DNA directed polymerase
PSMD9	-0.348625	-0.358129	1	0	PSMD9_716	pool11	-0.00536045	-0.329951	0.31923	2268.28	2272.52	proteasome 26S subunit, non-ATPase 9
FAN1	-0.0378675	0.237997	0	1	FAN1_1438	pool13	-0.00824569	0.0416902	-0.0581815	163.35	159.542	FANCD2/FANCI-associated nuclease 1
RTEL1	-0.428408	-0.439496	0	0	RTEL1_823	pool12	-0.00936369	-0.0187274	0	62.6368	61.8225	regulator of telomere elongation helicase 1
OBFC2A	-0.000304113	0.287098	0	1	OBFC2A_2749	pool12	-0.0108265	-1.15117	1.12952	3981.78	4507.75
RPAIN	-0.0450824	-1.29499	0	0	RPAIN_794	pool12	-0.0137632	0.143442	-0.170968	198.446	219.134	RPA interacting protein
PSMD10	-0.548828	-0.718967	0	0	PSMD10_686	pool13	-0.0161391	0.241926	-0.274204	1414.96	1440.68	proteasome 26S subunit, non-ATPase 10
SMC1A	-0.118558	0.143392	0	2	SMC1A_6246	pool12	-0.0194137	0.546683	-0.58551	405.342	591.76	structural maintenance of chromosomes 1A
TONSL	-1.79588	-0.605548	1	0	TONSL_2059	pool13	-0.0195679	2.9347	-2.97384	488.062	1111.99	tonsoku-like, DNA repair protein
EEF1E1	-0.589898	-0.971022	1	0	EEF1E1_168	pool13	-0.0197269	0.48514	-0.524594	5497.04	6025.22	eukaryotic translation elongation factor 1 epsilon 1
PSMD7	-0.0518316	0.439376	0	1	PSMD7_230	pool12	-0.0203118	-0.0406237	0	193.605	188.215	proteasome 26S subunit, non-ATPase 7
TRIAP1	-0.126215	-0.124591	0	1	TRIAP1_198	pool11	-0.020409	0.634121	-0.674938	3071.05	3027.17	TP53 regulated inhibitor of apoptosis 1
TOPBP1	-0.193413	-0.00651968	0	1	TOPBP1_5311	pool12	-0.0206507	0.546191	-0.587492	958.066	1398.06	topoisomerase (DNA) II binding protein 1
MSH3	-0.22388	-1.79588	2	0	MSH3_2782	pool12	-0.0208763	0.528303	-0.570056	3104.35	2494.21	mutS homolog 3
INTS7	-0.185486	-0.0230085	0	1	INTS7_2321	pool12	-0.0246371	-0.462277	0.413003	52.1667	37.8933	integrator complex subunit 7
XRCC6	-0.210278	-0.523458	0	0	XRCC6_481	pool12	-0.0260242	-1.04798	0.995928	23.6954	11.6992	X-ray repair complementing defective repair in Chinese hamster cells 6
MRPS11	-0.309981	-0.398483	0	0	MRPS11_1124	pool12	-0.026543	-0.319651	0.266565	1812.04	1764.39	mitochondrial ribosomal protein S11
SNAI2	-0.110418	0.0101054	0	2	SNAI2_988	pool11	-0.0266206	-0.605561	0.55232	2034.21	2203.56	snail family zinc finger 2
PSMD5	-0.0298392	0.543786	0	2	PSMD5_570	pool12	-0.0266528	0.117663	-0.170968	124.788	135.33	proteasome 26S subunit, non-ATPase 5
NEK1	-0.844057	-2.27572	2	0	NEK1_5178	pool13	-0.0271738	-0.118481	0.0641335	840.88	814.107	NIMA related kinase 1
CDC14B	-0.0155177	0.284582	0	2	CDC14B_4787	pool12	-0.0274136	0.529144	-0.583971	53.702	77.3574	cell division cycle 14B
POLD3	-0.000434512	-0.484789	0	0	POLD3_307	pool11	-0.0281693	0.279058	-0.335397	400.581	380.238	polymerase (DNA-directed), delta 3, accessory subunit
CASP3	-0.215525	-0.447453	0	0	CASP3_2136	pool11	-0.0291933	-0.546818	0.488431	1439.2	1436.93	caspase 3
PSMD7	-0.0518316	0.439376	0	1	PSMD7_1627	pool12	-0.0294542	0.746098	-0.805007	1595	1867.12	proteasome 26S subunit, non-ATPase 7
FAM175A	-0.00100003	0.432974	0	2	FAM175A_2573	pool12	-0.0296814	0.0589691	-0.118332	3468.09	3430.48	family with sequence similarity 175 member A
MACROD2	-0.038484	-0.319211	0	1	MACROD2_502	pool13	-0.0298913	-0.98078	0.920998	2532.5	2769.11	MACRO domain containing 2
PSME1	-0.350568	-0.26544	1	0	PSME1_299	pool11	-0.0312182	-0.267584	0.205148	385.815	383.572	proteasome activator subunit 1
FOXM1	-1.79048	-0.881405	2	0	FOXM1_3444	pool11	-0.0338909	-1.49047	1.42269	1288.56	1845.92	forkhead box M1
NSMCE4A	-0.202732	-0.148803	0	0	NSMCE4A_1311	pool12	-0.0339713	-0.38499	0.317048	2080.71	2212.01	NSE4 homolog A, SMC5-SMC6 complex component
EYA4	-0.0331077	0.056555	0	0	EYA4_4298	pool12	-0.0345251	-0.909133	0.840083	4181.83	6025.12	EYA transcriptional coactivator and phosphatase 4
RECQL	-0.188358	-0.372327	0	0	RECQL_3277	pool11	-0.0380244	-0.507879	0.43183	2065.77	2069.51	RecQ like helicase
ALKBH2	-0.095555	0.164944	0	1	ALKBH2_905	pool12	-0.0397964	-0.318399	0.238806	6136.48	6249.68	alkB homolog 2, alpha-ketoglutarate-dependent dioxygenase
FANCG	-0.346691	-0.311047	0	0	FANCG_2125	pool11	-0.041225	0.375289	-0.457739	67.1038	86.9468	Fanconi anemia complementation group G
E2F7	-0.0465786	-0.11685	0	2	E2F7_442	pool12	-0.0414143	0.915684	-0.998513	296.049	557.988	E2F transcription factor 7
GTF2H2C	-0.0408155	0.56607	0	1	GTF2H2C_942	pool13	-0.0414218	0.0426595	-0.125503	547.078	552.713	GTF2H2 family member C
NFATC2	-0.100398	0.470698	0	1	NFATC2_58	pool12	-0.0448004	0.607292	-0.696893	5765.1	6319.3	nuclear factor of activated T-cells, cytoplasmic, calcineurin-dependent 2
ASTE1	-0.0257186	-0.14315	0	0	ASTE1_2244	pool11	-0.0452676	0.289787	-0.380322	13001.5	12123	asteroid homolog 1 (Drosophila)
EPHA2	-0.0268259	0.0695604	0	1	EPHA2_2977	pool11	-0.0456646	0.278225	-0.369554	439.354	415.52	EPH receptor A2
SMARCA5	-0.422738	-0.184887	0	0	SMARCA5_2936	pool11	-0.0464749	-0.384211	0.291261	1784.08	1831.52	SWI/SNF related, matrix associated, actin dependent regulator of chromatin, subfamily a, member 5
EME1	-0.170375	-0.128135	1	2	EME1_336	pool12	-0.0503406	-0.513684	0.413003	86.5159	60.6144	essential meiotic structure-specific endonuclease 1
MCL1	-0.137094	-0.0408155	0	1	MCL1_1421	pool11	-0.051739	4.71708	-4.82055	31.1439	473.328	myeloid cell leukemia 1
EP300	-0.0192696	-0.000695428	1	0	EP300_2316	pool12	-0.05327	0.158264	-0.264804	245.719	274.041	E1A binding protein p300
EEPD1	-0.0433514	-0.445511	0	1	EEPD1_4070	pool12	-0.0539725	-0.107945	0	36.3698	33.7118	endonuclease/exonuclease/phosphatase family domain containing 1
GEN1	-0.0394817	0.711527	0	2	GEN1_5089	pool12	-0.0540056	-0.108011	0	99.925	92.681	GEN1, Holliday junction 5' flap endonuclease
C17orf70	-0.0842309	-0.244278	0	1	C17orf70_1475	pool12	-0.0547226	0.797695	-0.907141	253.5	439.898
APEX2	-0.0588365	0.773916	0	2	APEX2_1346	pool11	-0.0566418	-0.113284	0	32.3358	29.8561	APEX nuclease (apurinic/apyrimidinic endonuclease) 2
BBC3	-0.295678	-0.263524	2	2	BBC3_971	pool13	-0.0578196	5.19568	-5.31132	114.165	712.938	BCL2 binding component 3
TP53BP1	-0.0538918	-0.120159	0	0	TP53BP1_2429	pool12	-0.0583349	0.790471	-0.907141	508.272	878.363	tumor protein p53 binding protein 1
DTL	-0.0286314	-1.49894	0	0	DTL_4328	pool11	-0.0585409	0.278681	-0.395762	85.1792	102.978	denticleless E3 ubiquitin protein ligase homolog
CRY2	-2.50864	-1.37059	1	0	CRY2_2118	pool13	-0.0599637	-1.15144	1.03151	4375.19	5332.44	cryptochrome circadian clock 2
MACROD2	-0.038484	-0.319211	0	1	MACROD2_3804	pool13	-0.062937	1.11144	-1.23731	1224.55	1428.09	MACRO domain containing 2
MIF	-0.316863	-0.143271	0	1	MIF_380	pool11	-0.0656998	4.20891	-4.34031	174.969	306.821	macrophage migration inhibitory factor (glycosylation-inhibiting factor)
RAD21	-0.145269	-0.203148	0	0	RAD21_2202	pool13	-0.0686485	-0.744012	0.606715	2311.11	2477.64	RAD21 cohesin complex component
TRIM28	-0.0420577	0.692076	0	1	TRIM28_2596	pool11	-0.0691589	-2.65285	2.51453	672.322	1880.22	tripartite motif containing 28
NUDT1	-0.211337	-0.101001	0	2	NUDT1_605	pool11	-0.0695309	-0.243254	0.104192	5330.1	5093.94	nudix hydrolase 1
HUS1B	-0.330683	-0.217098	2	1	HUS1B_616	pool13	-0.0715181	-1.15603	1.013	2546.37	3285.91	HUS1 checkpoint clamp component B
BAG6	-0.183427	-0.0318441	0	0	BAG6_918	pool12	-0.0716519	0.440667	-0.583971	119.094	161.478	BCL2 associated athanogene 6
BRCC3	-0.400444	-0.220981	0	0	BRCC3_1082	pool13	-0.0717467	0.83955	-0.983043	2819.27	3059.14	BRCA1/BRCA2-containing complex subunit 3
MUM1	-0.0594337	-0.048274	1	0	MUM1_1481	pool12	-0.0718967	0.441717	-0.58551	272.537	369.833	melanoma associated antigen (mutated) 1
NDRG1	-1.06298	-0.250341	0	0	NDRG1_2797	pool13	-0.0723465	0.316252	-0.460945	614.649	670.085	N-myc downstream regulated 1
RAD9B	-0.175939	0.239879	0	2	RAD9B_1607	pool12	-0.0727132	-0.879136	0.733709	320.164	174.174	RAD9 checkpoint clamp component B
APTX	-0.0734003	-0.104191	0	1	APTX_105	pool12	-0.0744753	-0.148951	0	295.918	266.841	aprataxin
APC	-0.738737	-1.18776	1	0	APC_5507	pool13	-0.0747895	-1.56137	1.41179	728.001	1025.24	adenomatous polyposis coli
IRF3	-0.0085524	0.125055	1	1	IRF3_168	pool12	-0.0751112	-0.150222	0	297.938	268.426	interferon regulatory factor 3
CCNG1	-0.45618	-0.3213	0	0	CCNG1_1345	pool11	-0.0755411	0.692665	-0.843747	1962.6	2097.95	cyclin G1
REV1	-0.120503	0.113284	0	0	REV1_3317	pool12	-0.0782932	0.429848	-0.586435	606.176	816.072	REV1, DNA directed polymerase
RFWD3	-0.2909	-0.400008	1	1	RFWD3_1648	pool11	-0.0785671	0.347216	-0.504351	851.755	778.365	ring finger and WD repeat domain 3
HIPK2	-0.414539	-0.305395	1	0	HIPK2_4546	pool13	-0.0791411	-0.639915	0.481633	2484.68	2402.11	homeodomain interacting protein kinase 2
NPM1	-0.280337	-0.562884	0	0	NPM1_888	pool11	-0.0813026	-0.511263	0.348658	12587.4	12181.8	nucleophosmin (nucleolar phosphoprotein B23, numatrin)
PLK3	-0.222138	-1.284	0	1	PLK3_1160	pool11	-0.0825099	-1.31061	1.14559	637.049	848.23	polo like kinase 3
CUL4A	-0.0528114	0.513286	0	1	CUL4A_1186	pool11	-0.0828091	-0.518203	0.352585	760.465	779.21	cullin 4A
STUB1	-0.0304909	-0.361411	0	0	STUB1_1548	pool13	-0.0829766	0.287425	-0.453378	1968.64	1906.48	STIP1 homology and U-box containing protein 1, E3 ubiquitin protein ligase
RUVBL1	-4	-1.12436	3	0	RUVBL1_991	pool11	-0.0831824	-0.166365	0	0.224554	0.145639	RuvB like AAA ATPase 1
CCND1	-0.180522	-0.076238	1	2	CCND1_3671	pool11	-0.0856487	-0.0487309	-0.122566	897.622	846.887	cyclin D1
PSMB6	-0.140501	-0.201004	0	1	PSMB6_578	pool12	-0.0873892	-0.174778	0	0.183686	0.10568	proteasome subunit beta 6
MRPS26	-0.15658	-0.0535477	0	1	MRPS26_516	pool12	-0.0896104	-0.179221	0	15.9806	14.0554	mitochondrial ribosomal protein S26
CDC14B	-0.0155177	0.284582	0	2	CDC14B_3578	pool12	-0.0898932	-0.244093	0.0643065	1464.56	1336.5	cell division cycle 14B
MUM1	-0.0594337	-0.048274	1	0	MUM1_1504	pool12	-0.0901545	0.403662	-0.583971	598.881	792.068	melanoma associated antigen (mutated) 1
MUM1	-0.0594337	-0.048274	1	0	MUM1_3541	pool12	-0.0907122	-0.594427	0.413003	388.311	257.178	melanoma associated antigen (mutated) 1
TRIM28	-0.0420577	0.692076	0	1	TRIM28_2192	pool11	-0.092419	-1.25236	1.06752	96.625	73.673	tripartite motif containing 28
RFWD2	-0.041962	0.0045842	0	1	RFWD2_1511	pool12	-0.0925424	-0.301613	0.116528	5301	4783.46	ring finger and WD repeat domain 2, E3 ubiquitin protein ligase
PLA2R1	-4	-1.11182	1	0	PLA2R1_3944	pool13	-0.0939375	-0.376862	0.188987	434.11	426.4	phospholipase A2 receptor 1
CETN2	-0.250728	-1.30277	0	0	CETN2_593	pool11	-0.0950738	-0.588556	0.398408	3579.23	3455.3	centrin 2
PALB2	-1.44249	-0.408379	1	0	PALB2_736	pool11	-0.095169	-0.2508	0.0604623	2637.18	2478.92	partner and localizer of BRCA2
PSMD1	-1.10292	-1.2636	2	0	PSMD1_1637	pool13	-0.0957741	3.53265	-3.7242	110.23	1210.26	proteasome 26S subunit, non-ATPase 1
HUS1B	-0.330683	-0.217098	2	1	HUS1B_887	pool13	-0.0964361	0.0625583	-0.255431	4044.82	3814.35	HUS1 checkpoint clamp component B
RTEL1	-0.428408	-0.439496	0	0	RTEL1_1341	pool12	-0.0984702	-0.19694	0	46.1051	40.1582	regulator of telomere elongation helicase 1
CHAF1A	-0.0346572	-0.38637	0	0	CHAF1A_3032	pool12	-0.0992454	-0.198491	0	63.7389	55.4818	chromatin assembly factor 1 subunit A
HUS1	-0.0424885	0.288952	1	3	HUS1_1703	pool12	-0.0996538	0.152995	-0.352303	5559.66	5110.21	HUS1 checkpoint clamp component
RFWD2	-0.041962	0.0045842	0	1	RFWD2_1517	pool12	-0.0999817	0.826301	-1.02626	6860.76	4346.71	ring finger and WD repeat domain 2, E3 ubiquitin protein ligase
MAD2L2	-0.0278435	0.496209	1	2	MAD2L2_245	pool12	-0.10034	-0.954385	0.753705	317.616	392.285	MAD2 mitotic arrest deficient-like 2 (yeast)
MDC1	-0.0009565	-0.594654	1	1	MDC1_5940	pool12	-0.102767	-0.205533	0	90.7407	78.6256	mediator of DNA damage checkpoint 1
NDNL2	-0.170761	0.0357404	0	2	NDNL2_1623	pool12	-0.104637	-0.656785	0.44751	2703.57	1986.35
LYN	-0.050854	0.453087	0	2	LYN_838	pool11	-0.106117	-0.728582	0.516349	1204.61	1248.44	LYN proto-oncogene, Src family tyrosine kinase
XRCC1	-0.208309	-0.0716041	0	2	XRCC1_1859	pool12	-0.107219	-0.627441	0.413003	58.2283	37.682	X-ray repair complementing defective repair in Chinese hamster cells 1
SP100	-0.0332483	-0.322667	0	0	SP100_284	pool11	-0.107223	0.815839	-1.03028	602.575	377.618	SP100 nuclear antigen
XRCC3	-0.114752	-0.200315	0	0	XRCC3_359	pool12	-0.108253	0.186998	-0.403504	972.684	915.402	X-ray repair complementing defective repair in Chinese hamster cells 3
NUDT16	-0.44406	-0.330404	1	0	NUDT16_182	pool13	-0.108272	-0.091194	-0.12535	239.947	221.838	nudix hydrolase 16
CCNH	-1.07831	-0.397072	1	0	CCNH_876	pool13	-0.11077	0.71592	-0.93746	687.654	506.476	cyclin H
PTTG1	-0.356547	-0.073709	0	0	PTTG1_8	pool11	-0.114058	1.80662	-2.03474	683.917	979.63	pituitary tumor-transforming 1
RECQL	-0.188358	-0.372327	0	0	RECQL_2368	pool11	-0.115845	-0.662379	0.430689	2824.02	2904.55	RecQ like helicase
BAZ1B	-0.333014	-0.648011	1	0	BAZ1B_5150	pool13	-0.115891	-0.443504	0.211722	1316.61	1235.38	bromodomain adjacent to zinc finger domain 1B
ALKBH8	-0.132709	0.315424	0	2	ALKBH8_2485	pool12	-0.116173	-0.00663121	-0.225715	7047.29	6522.71	alkB homolog 8, tRNA methyltransferase
UHRF1	-0.00572685	-0.0562582	0	2	UHRF1_1675	pool12	-0.118154	1.14725	-1.38356	301.797	209.502	ubiquitin-like with PHD and ring finger domains 1
GTF2H2	-0.0456127	0.820448	0	0	GTF2H2_1784	pool12	-0.118513	-0.294545	0.0575184	1890.61	1710.06	general transcription factor IIH subunit 2
UBE2W	-0.890421	-1.51145	1	0	UBE2W_1084	pool13	-0.120862	-1.8826	1.64087	921.168	1388.47	ubiquitin conjugating enzyme E2W (putative)
DDB1	-2.14267	-1.25414	3	0	DDB1_1521	pool13	-0.12362	1.92136	-2.1686	188.833	703.909	damage specific DNA binding protein 1
RNF169	-0.0339052	0.338945	0	2	RNF169_6859	pool12	-0.125596	-0.174705	-0.0764869	12409.5	11334.2	ring finger protein 169
SFN	-0.383419	-1.64397	2	0	SFN_1240	pool13	-0.125792	-3.8882	3.63661	346.399	1788.85	stratifin
POLD4	-0.681311	-0.879755	0	0	POLD4_648	pool11	-0.127218	-1.26337	1.00893	1915.4	2012.5	polymerase (DNA-directed), delta 4, accessory subunit
MUC1	-0.173925	-0.199008	1	1	MUC1_350	pool12	-0.129496	0.32498	-0.583971	22.8428	28.4278	mucin 1, cell surface associated
PPP2R5C	-0.0867691	0.107405	0	0	PPP2R5C_1200	pool12	-0.130378	-0.257308	-0.00344868	621.672	520.198	protein phosphatase 2 regulatory subunit B', gamma
PMS1	-0.255942	-0.25189	0	1	PMS1_591	pool12	-0.13179	-0.26358	0	18.3686	15.2179	PMS1 homolog 1, mismatch repair system component
MUC1	-0.173925	-0.199008	1	1	MUC1_409	pool12	-0.13197	-0.997649	0.733709	132.805	66.5925	mucin 1, cell surface associated
SMARCB1	-0.341989	-0.529296	0	1	SMARCB1_327	pool12	-0.133357	-0.67867	0.411957	187.976	117.59	SWI/SNF related, matrix associated, actin dependent regulator of chromatin, subfamily b, member 1
MUS81	-0.0147083	-0.465593	0	0	MUS81_1965	pool11	-0.135723	0.124315	-0.395762	527.551	574.704	MUS81 structure-specific endonuclease subunit
CHEK2	-0.185752	-0.136439	0	0	CHEK2_1349	pool11	-0.137081	0.174695	-0.448858	783.568	748.148	checkpoint kinase 2
UBE2V1	-0.899974	-2.95861	1	0	UBE2V1_408	pool13	-0.138441	-1.69497	1.41809	780.277	1219.22	ubiquitin conjugating enzyme E2 variant 1
MYO6	-0.0397195	0.327164	0	1	MYO6_5316	pool12	-0.140194	-0.142661	-0.137728	1961.86	1778.72	myosin VI
MUS81	-0.0147083	-0.465593	0	0	MUS81_2290	pool11	-0.14251	-1.53098	1.24596	850.227	921.99	MUS81 structure-specific endonuclease subunit
RFC3	-0.593119	-0.567993	1	0	RFC3_461	pool12	-0.144462	-0.288925	0	84.6791	69.2201	replication factor C subunit 3
POLR2B	-1.4023	-0.791021	2	0	POLR2B_882	pool13	-0.145403	5.00117	-5.29198	36.4855	333.012	polymerase (RNA) II (DNA directed) polypeptide B, 140kDa
BRCA2	-0.428291	-0.286509	0	0	BRCA2_2554	pool11	-0.14861	0.744872	-1.04209	1228.84	1182.14	breast cancer 2
IGHMBP2	-0.254067	-0.46801	2	1	IGHMBP2_505	pool13	-0.148779	-0.0431177	-0.254441	855.434	772.365	immunoglobulin mu binding protein 2
POLI	-0.197774	-0.139363	0	0	POLI_408	pool11	-0.149072	0.196813	-0.494957	2967.3	2734.87	polymerase (DNA directed) iota
TLK1	-1.27901	-0.703116	1	0	TLK1_3073	pool13	-0.149323	-1.42682	1.12817	1242.11	1783.07	tousled like kinase 1
TP53BP1	-0.0538918	-0.120159	0	0	TP53BP1_3222	pool12	-0.151343	-0.675104	0.372418	753.785	686.44	tumor protein p53 binding protein 1
ZFYVE26	-0.219683	-0.292685	1	0	ZFYVE26_4112	pool11	-0.152536	3.69404	-3.99911	25.3904	7.09037	zinc finger FYVE-type containing 26
MUS81	-0.0147083	-0.465593	0	0	MUS81_2289	pool11	-0.155971	-0.136501	-0.17544	104.35	93.3438	MUS81 structure-specific endonuclease subunit
MSH5	-0.401866	-0.37059	0	0	MSH5_2137	pool13	-0.156563	-0.516817	0.203692	1115.1	1117.02	mutS homolog 5
TP53BP1	-0.0538918	-0.120159	0	0	TP53BP1_1796	pool12	-0.159883	-0.0549622	-0.264804	325.806	313.46	tumor protein p53 binding protein 1
MYC	-0.0297461	-0.164627	0	2	MYC_2210	pool11	-0.160582	0.178523	-0.499687	6531.53	5854.7	v-myc avian myelocytomatosis viral oncogene homolog
FANCG	-0.346691	-0.311047	0	0	FANCG_1276	pool11	-0.161291	4.33679	-4.65937	25.1593	272.783	Fanconi anemia complementation group G
PRPF19	-0.920819	-0.999566	2	0	PRPF19_1604	pool13	-0.161905	-5.39971	5.0759	56.2867	851.803	pre-mRNA processing factor 19
DDIT4	-0.00182788	0.164309	0	2	DDIT4_1360	pool11	-0.163396	0.193502	-0.520293	1161.6	1044.03	DNA damage inducible transcript 4
SGK1	-0.195929	-0.229958	1	0	SGK1_1815	pool12	-0.163609	0.237514	-0.564733	2576.07	2119.27	serum/glucocorticoid regulated kinase 1
JMY	-0.283663	-0.2423	0	1	JMY_5946	pool13	-0.163631	-0.0717415	-0.25552	258.974	231.389	junction mediating and regulatory protein, p53 cofactor
CDKN2A	-0.0163286	0.784891	0	1	CDKN2A_757	pool12	-0.163759	0.106695	-0.434212	1792.09	1525.73	cyclin-dependent kinase inhibitor 2A
POLK	-0.0439277	-0.708853	0	1	POLK_3469	pool13	-0.166179	0.0682695	-0.400627	2032.03	1849.64	polymerase (DNA directed) kappa
PSME4	-0.154964	-0.186686	0	0	PSME4_1808	pool11	-0.166794	-0.294449	-0.0391392	5179.99	4715.63	proteasome activator subunit 4
PSMD5	-0.0298392	0.543786	0	2	PSMD5_336	pool12	-0.16694	1.75324	-2.08712	586.228	746.452	proteasome 26S subunit, non-ATPase 5
CDKN1B	-0.162475	-0.503209	0	0	CDKN1B_2027	pool12	-0.169472	-0.306918	-0.0320265	901.977	751.881	cyclin-dependent kinase inhibitor 1B (p27, Kip1)
XRCC2	-0.388064	-1.54975	1	0	XRCC2_2542	pool12	-0.169601	-0.339203	0	67.78	53.4738	X-ray repair complementing defective repair in Chinese hamster cells 2
CETN2	-0.250728	-1.30277	0	0	CETN2_765	pool11	-0.17078	-0.0467668	-0.294794	9168.97	8185.88	centrin 2
RPA4	-0.0797201	0.106627	0	1	RPA4_767	pool12	-0.172692	0.24105	-0.586435	211.252	249.207	replication protein A4
INO80D	-0.225848	-0.0773264	0	0	INO80D_4641	pool13	-0.174011	0.0190146	-0.367036	790.129	704.763	INO80 complex subunit D
UBE2D3	-0.116736	-0.0180908	0	1	UBE2D3_364	pool11	-0.17583	0.324395	-0.676054	883.076	827.988	ubiquitin conjugating enzyme E2D 3
XPC	-0.0746879	0.182765	0	1	XPC_3391	pool12	-0.179373	-0.471458	0.112712	1637.55	1457.52	xeroderma pigmentosum, complementation group C
SMC4	-0.448916	-0.309627	0	0	SMC4_825	pool11	-0.179862	-0.412605	0.05288	1577	1405.8	structural maintenance of chromosomes 4
RFC1	-0.736601	-0.52491	1	0	RFC1_3419	pool11	-0.180188	-1.85352	1.49315	997.518	1040.48	replication factor C subunit 1
TMEM161A	-4	-1.49349	2	1	TMEM161A_133	pool11	-0.183539	-0.19989	-0.167187	970.559	852.266	transmembrane protein 161A
YY1	-0.257353	-0.178618	1	1	YY1_905	pool13	-0.184089	0.77801	-1.14619	902.893	838.02	YY1 transcription factor
TREX2	-4	-0.894831	2	0	TREX2_566	pool13	-0.185103	-0.304327	-0.065878	855.309	751.441	three prime repair exonuclease 2
MAPKAPK2	-0.0975076	0.388489	1	2	MAPKAPK2_3027	pool12	-0.18606	0.211851	-0.583971	467.729	541.502	mitogen-activated protein kinase-activated protein kinase 2
GADD45A	-0.0488568	-0.60415	0	1	GADD45A_791	pool11	-0.190781	-0.219774	-0.161787	25246.7	22157.9	growth arrest and DNA damage inducible alpha
RBX1	-0.580209	-0.510886	1	1	RBX1_581	pool13	-0.19361	0.431055	-0.818276	1357.41	1434.06	ring-box 1, E3 ubiquitin protein ligase
EEF1E1	-0.589898	-0.971022	1	0	EEF1E1_163	pool13	-0.194224	-0.443909	0.05546	0.345221	0.191143	eukaryotic translation elongation factor 1 epsilon 1
BABAM1	-4	-1.17914	2	0	BABAM1_497	pool13	-0.194524	-0.166604	-0.222443	281.487	244.156	BRISC and BRCA1 A complex member 1
PLK5	-0.551912	-0.387322	1	0	PLK5_760	pool13	-0.197749	-0.327798	-0.0676991	1921.02	1630.85	polo like kinase 5
RAD50	-0.138346	-0.0128255	0	0	RAD50_1493	pool12	-0.199206	0.185558	-0.583971	115.788	131.465	RAD50 double strand break repair protein
NHEJ1	-0.563519	-0.753748	0	0	NHEJ1_627	pool13	-0.199833	7.06984	-7.4695	122.353	115.269	non-homologous end joining factor 1
ASCC3	-0.0653501	0.104467	0	0	ASCC3_459	pool11	-0.200304	0.225117	-0.625724	37.3531	35.6941	activating signal cointegrator 1 complex subunit 3
MSH6	-0.477165	-0.247107	0	0	MSH6_2569	pool11	-0.200417	-0.184372	-0.216462	1341.83	1170.21	mutS homolog 6
BTG2	-0.0447935	0.706637	0	2	BTG2_2612	pool12	-0.201816	0.18034	-0.583971	124.788	141.188	BTG family member 2
SPRED2	-1.50724	-0.930702	1	0	SPRED2_2122	pool13	-0.201878	-1.34263	0.938872	1650.24	2055.5	sprouty-related, EVH1 domain containing 2
POLR2L	-0.0233291	0.256804	0	3	POLR2L_860	pool12	-0.202634	0.125151	-0.530419	2264.25	1790.09	polymerase (RNA) II (DNA directed) polypeptide L, 7.6kDa
LIG1	-0.391046	-0.167363	0	0	LIG1_1385	pool11	-0.202748	0.768073	-1.17357	1640.36	1550.7	ligase I, DNA, ATP-dependent
EID3	-0.274578	-0.105407	0	0	EID3_1212	pool13	-0.204153	-0.0185752	-0.389732	1575.79	1367.38	EP300 interacting inhibitor of differentiation 3
RBM14	-0.0297926	0.325139	0	2	RBM14_1421	pool12	-0.204701	0.589112	-0.998513	85.5454	128.189	RNA binding motif protein 14
C19orf39	-0.141523	-0.0769115	1	1	C19orf39_873	pool12	-0.204736	0.174499	-0.583971	385.989	435.4
TONSL	-1.79588	-0.605548	1	0	TONSL_2821	pool13	-0.205799	0	-0.411597	0.165079	0	tonsoku-like, DNA repair protein
C11orf30	-4	-0.74642	2	0	C11orf30_1870	pool13	-0.205799	0	-0.411597	0.165079	0
HUWE1	-4	-1.36151	3	1	HUWE1_11092	pool13	-0.205799	0	-0.411597	0.165079	0	HECT, UBA and WWE domain containing 1, E3 ubiquitin protein ligase
CHEK2	-0.185752	-0.136439	0	0	CHEK2_1454	pool11	-0.207132	8.50175	-8.91601	241.022	180.739	checkpoint kinase 2
PAXIP1	-0.283496	-0.310514	1	0	PAXIP1_2509	pool11	-0.207919	0.541311	-0.957149	550.687	380.116	PAX interacting (with transcription-activation domain) protein 1
FOXO1	-0.0662597	0.123147	0	0	FOXO1_4982	pool12	-0.208528	0.0788041	-0.49586	1370.32	1026.83	forkhead box O1
BAG6	-0.183427	-0.0318441	0	0	BAG6_538	pool12	-0.217288	-8.56322	8.12865	709.539	489.938	BCL2 associated athanogene 6
GTF2H1	-0.0310503	-0.437113	0	2	GTF2H1_1039	pool12	-0.217834	0.140141	-0.575808	774.328	659.394	general transcription factor IIH subunit 1
CIB1	-0.216883	-0.294051	1	0	CIB1_934	pool11	-0.217948	-0.689565	0.253669	5366.5	4544.2	calcium and integrin binding 1
XRCC2	-0.388064	-1.54975	1	0	XRCC2_2280	pool12	-0.21853	0.41221	-0.849271	574.648	763.866	X-ray repair complementing defective repair in Chinese hamster cells 2
CDCA5	-0.16845	-0.341416	1	1	CDCA5_1839	pool12	-0.218634	-0.656493	0.219225	212.84	135.193	cell division cycle associated 5
TIPRL	-0.954286	-0.789949	1	0	TIPRL_358	pool13	-0.221954	-0.443909	0	0.180142	0	TOR signaling pathway regulator
RUVBL2	-0.00104356	-0.732828	0	0	RUVBL2_45	pool12	-0.224163	0.137183	-0.58551	47.1551	51.526	RuvB-like AAA ATPase 2
FOXO4	-0.642256	-0.47237	0	0	FOXO4_3106	pool13	-0.226145	-0.473534	0.0212437	5010.73	4471.53	forkhead box O4
CTLA4	-0.459295	-0.239879	0	0	CTLA4_918	pool13	-0.227293	0.1578	-0.612385	398.654	309.78	cytotoxic T-lymphocyte associated protein 4
EPC2	-0.673459	-1.80688	1	0	EPC2_1790	pool13	-0.227503	-1.40216	0.94715	571.509	624.683	enhancer of polycomb homolog 2
EYA4	-0.0331077	0.056555	0	0	EYA4_3877	pool12	-0.227991	-0.455983	0	86.1486	62.668	EYA transcriptional coactivator and phosphatase 4
POLD2	-0.842543	-0.601713	0	0	POLD2_242	pool11	-0.22887	0	-0.457739	0.186694	0	polymerase (DNA directed), delta 2, accessory subunit
AEN	-0.756962	-0.526513	0	0	AEN_1028	pool11	-0.229591	-0.535166	0.0759826	0.411248	0.22383	apoptosis enhancing nuclease
TRIM28	-0.0420577	0.692076	0	1	TRIM28_2591	pool11	-0.2328	-0.406777	-0.0588226	4011.56	3491.57	tripartite motif containing 28
PSMC1	-4	-0.876148	2	0	PSMC1_293	pool13	-0.236491	0.48967	-0.962653	608.761	596.743	proteasome 26S subunit, ATPase 1
BCCIP	-0.452595	-0.380176	0	1	BCCIP_187	pool11	-0.236806	-0.577207	0.103595	1887.38	1576.86	BRCA2 and CDKN1A interacting protein
USP16	-0.104301	-0.10785	0	1	USP16_2613	pool12	-0.240984	-0.481968	0	30.3081	21.5586	ubiquitin specific peptidase 16
C9orf80	-0.610834	-0.298518	0	0	C9orf80_195	pool13	-0.243469	-0.0223984	-0.464541	1001.48	859.39
APC	-0.738737	-1.18776	1	0	APC_8921	pool13	-0.246484	-0.204011	-0.288958	668.135	565.853	adenomatous polyposis coli
SUPT16H	-0.62672	-1.33819	1	0	SUPT16H_2921	pool13	-0.250095	-1.63515	1.13496	422.816	454.122	SPT16 homolog, facilitates chromatin remodeling subunit
CIB1	-0.216883	-0.294051	1	0	CIB1_927	pool11	-0.250848	0.801551	-1.30325	786.373	672.894	calcium and integrin binding 1
SMG1	-0.0326861	0.446602	0	2	SMG1_1877	pool12	-0.252767	0.0784372	-0.583971	134.34	141.611	SMG1 phosphatidylinositol 3-kinase-related kinase
BLM	-0.00121773	0.927383	0	0	BLM_4418	pool11	-0.252797	-1.38808	0.882486	2295.16	2597.35	Bloom syndrome RecQ like helicase
E2F1	-0.0204972	-0.704873	0	0	E2F1_918	pool12	-0.259047	-0.518095	0	0.367371	0.10568	E2F transcription factor 1
FOXN3	-0.15789	0.169475	0	2	FOXN3_2752	pool12	-0.259303	-0.321742	-0.196863	1197.11	991.359	forkhead box N3
TRIP12	-0.0758241	-0.274415	1	1	TRIP12_2881	pool12	-0.260722	0.188221	-0.709665	392.789	401.307	thyroid hormone receptor interactor 12
TAF9B	-0.351445	-0.339894	0	0	TAF9B_453	pool13	-0.262969	-0.483374	-0.0425648	2375.3	1945.84	TATA-box binding protein associated factor 9b
CETN2	-0.250728	-1.30277	0	0	CETN2_241	pool11	-0.264909	-0.802607	0.272789	2229.5	1948.31	centrin 2
ANKRD1	-4	-0.89449	2	0	ANKRD1_686	pool13	-0.26557	-0.138067	-0.393073	806.795	668.081	ankyrin repeat domain 1
ZSWIM7	-0.364215	-1.86967	1	1	ZSWIM7_478	pool13	-0.266058	-1.0094	0.477279	673.956	682.521	zinc finger SWIM-type containing 7
SMUG1	-0.144057	-0.332547	1	0	SMUG1_1345	pool12	-0.266324	-0.682387	0.149738	165.567	103.158	single-strand-selective monofunctional uracil-DNA glycosylase 1
XRCC3	-0.114752	-0.200315	0	0	XRCC3_893	pool12	-0.267688	-0.364409	-0.170968	175.486	136.175	X-ray repair complementing defective repair in Chinese hamster cells 3
FOXO3	-0.983803	-1.69465	1	0	FOXO3_4520	pool13	-0.269345	-0.532274	-0.00641559	3101.36	2524.24	forkhead box O3
ERCC3	-1.78516	-0.955068	1	0	ERCC3_2151	pool13	-0.270689	0.286451	-0.827829	1057.26	927.964	excision repair cross-complementation group 3
CIB1	-0.216883	-0.294051	1	0	CIB1_446	pool11	-0.277922	-0.555844	0	0.449108	0.145639	calcium and integrin binding 1
IFI16	-0.281997	-0.166152	0	0	IFI16_307	pool11	-0.277938	0.153416	-0.709292	4918.65	4393.96	interferon, gamma-inducible protein 16
CHEK1	-0.0594337	0.00718148	0	2	CHEK1_1242	pool11	-0.278014	-0.133491	-0.422536	4730.11	3932.98	checkpoint kinase 1
NHEJ1	-0.563519	-0.753748	0	0	NHEJ1_2055	pool13	-0.278784	-0.635514	0.0779462	219.396	184.244	non-homologous end joining factor 1
RAD54B	-0.106294	0.291494	1	3	RAD54B_548	pool12	-0.279489	0.392605	-0.951583	1631.97	1305.17	RAD54 homolog B (S. cerevisiae)
MCTS1	-0.120445	-0.20294	0	0	MCTS1_2491	pool13	-0.280755	-1.29762	0.73611	743.083	801.907	malignant T-cell amplified sequence 1
AP5S1	-0.0522723	-0.0881502	0	1	AP5S1_1456	pool12	-0.281324	-1.01602	0.453369	391.887	332.293	adaptor related protein complex 5 sigma 1 subunit
CLSPN	-0.0455645	-0.0318908	0	1	CLSPN_1840	pool13	-0.283524	-2.7978	2.23075	493.368	1125.42	claspin
KIAA2022	-0.80827	-0.442733	1	0	KIAA2022_11142	pool13	-0.285356	0.0769268	-0.64764	657.297	556.475	KIAA2022
FANCF	-0.394049	-0.290221	0	0	FANCF_3077	pool11	-0.285898	-0.182852	-0.388945	1817.37	1524.53	Fanconi anemia complementation group F
CSNK1E	-0.144541	0.0710412	0	1	CSNK1E_699	pool12	-0.286608	-0.402247	-0.170968	35.8845	27.0083	casein kinase 1 epsilon
IFI16	-0.281997	-0.166152	0	0	IFI16_306	pool11	-0.287222	-1.0296	0.455154	874.955	889.598	interferon, gamma-inducible protein 16
CCNK	-0.0191788	0.324588	0	0	CCNK_2515	pool12	-0.287878	0.448335	-1.02409	7098.59	5450.73	cyclin K
E2F7	-0.0465786	-0.11685	0	2	E2F7_1583	pool12	-0.289987	0.00646058	-0.586435	137.411	137.609	E2F transcription factor 7
RDM1	-0.0507076	0.137392	0	0	RDM1_151	pool12	-0.291491	0.0242544	-0.607236	2785.62	2161.02	RAD52 motif containing 1
PSMA6	-0.221126	0.091247	0	1	PSMA6_968	pool12	-0.291986	0	-0.583971	0.249485	0	proteasome subunit alpha 6
TOPORS	-0.00397017	0.32744	0	1	TOPORS_1660	pool12	-0.291996	-0.360442	-0.22355	4027.65	3309.52	topoisomerase I binding, arginine/serine-rich, E3 ubiquitin protein ligase
ATR	-1.38405	-0.745694	2	0	ATR_4220	pool13	-0.292041	0.478331	-1.06241	257.844	227.987	ATR serine/threonine kinase
XRCC5	-4.34316e-05	0.54806	0	0	XRCC5_1013	pool12	-0.292767	0.194496	-0.780031	1314.67	1503.43	X-ray repair complementing defective repair in Chinese hamster cells 5
SSRP1	-0.142788	-0.122111	0	1	SSRP1_2168	pool11	-0.293853	-0.259102	-0.328605	702.955	573.739	structure specific recognition protein 1
KAT5	-0.34727	-0.322849	1	0	KAT5_1173	pool13	-0.294073	-0.0260655	-0.56208	853.05	677.818	lysine acetyltransferase 5
CXCR7	-0.59363	-0.521867	1	0	CXCR7_83	pool13	-0.294297	0.536864	-1.12546	270.327	226.84
RAD51L1	-0.099469	-0.881074	2	1	RAD51L1_562	pool12	-0.294637	0.317867	-0.907141	303.83	378.076
RHNO1	-0.00370728	0.396423	0	2	RHNO1_1426	pool12	-0.294998	0.408516	-0.998513	386.606	512.651	RAD9-HUS1-RAD1 interacting nuclear orphan 1
MACROD1	-0.209785	-0.0271494	0	2	MACROD1_468	pool12	-0.297447	-0.0109234	-0.583971	71.7032	70.911	MACRO domain containing 1
APLF	-0.295249	-0.106405	0	1	APLF_3624	pool12	-0.299062	-0.333319	-0.264804	391.015	310.184	aprataxin and PNKP like factor
SMC3	-0.0968557	-0.69229	1	1	SMC3_1337	pool12	-0.300936	-0.301737	-0.300135	1917.93	1556.79	structural maintenance of chromosomes 3
ALKBH2	-0.095555	0.164944	0	1	ALKBH2_238	pool12	-0.305456	-1.60684	0.995928	94.047	31.0386	alkB homolog 2, alpha-ketoglutarate-dependent dioxygenase
BCLAF1	-0.306537	-0.143452	0	1	BCLAF1_4222	pool13	-0.30912	-1.61765	0.999416	1012.57	862.144	BCL2 associated transcription factor 1
NIPBL	-0.242984	0.10824	0	0	NIPBL_5041	pool11	-0.309939	1.47068	-2.09056	991.901	1533.87	Nipped-B homolog (Drosophila)
PSMD8	-0.241467	-1.14086	1	1	PSMD8_713	pool12	-0.31281	-1.03862	0.413003	145.112	70.5483	proteasome 26S subunit, non-ATPase 8
ATRIP	-0.175094	0.185886	0	3	ATRIP_697	pool12	-0.317836	-3.02733	2.39166	1267.18	3100.45	ATR interacting protein
MCM8	-0.220548	-8.68676e-05	0	1	MCM8_3638	pool12	-0.318865	0.585635	-1.22336	2121.98	1737.5	minichromosome maintenance 8 homologous recombination repair factor
REV1	-0.120503	0.113284	0	0	REV1_1241	pool12	-0.326311	-0.652622	0	88.1691	55.9045	REV1, DNA directed polymerase
PSMD14	-0.498256	-0.351445	1	1	PSMD14_1576	pool12	-0.32731	0.39278	-1.0474	5536.18	3443.93	proteasome 26S subunit, non-ATPase 14
FOXM1	-1.79048	-0.881405	2	0	FOXM1_711	pool11	-0.3294	-0.818693	0.159893	370.734	246.603	forkhead box M1
MPG	-0.394479	-0.336488	0	0	MPG_454	pool12	-0.329419	-1.07184	0.413003	0.551057	0.165727	N-methylpurine DNA glycosylase
SUPT16H	-0.62672	-1.33819	1	0	SUPT16H_3249	pool13	-0.330644	0.331822	-0.993111	0.495236	0.129301	SPT16 homolog, facilitates chromatin remodeling subunit
XRCC3	-0.114752	-0.200315	0	0	XRCC3_76	pool12	-0.330852	-0.0383504	-0.623353	430.487	330.246	X-ray repair complementing defective repair in Chinese hamster cells 3
CCNG1	-0.45618	-0.3213	0	0	CCNG1_2340	pool11	-0.33132	-0.689113	0.0264717	773.391	622.344	cyclin G1
RNF8	-0.355758	-0.49147	0	1	RNF8_5348	pool13	-0.333982	-2.20652	1.53855	347.196	450.789	ring finger protein 8, E3 ubiquitin protein ligase
TWIST1	-0.0122891	0.533577	0	2	TWIST1_781	pool12	-0.335529	-8.97127	8.30021	356.534	157.321	twist family bHLH transcription factor 1
FOXO1	-0.0662597	0.123147	0	0	FOXO1_3174	pool12	-0.336398	-0.838838	0.166043	4308.96	3889.37	forkhead box O1
KIAA0415	-0.0295137	4	0	1	KIAA0415_5221	pool12	-0.336542	-1.08452	0.411433	540.718	255.305
C9orf102	-0.0548762	-0.162285	1	0	C9orf102_3079	pool13	-0.340212	-0.21378	-0.466644	1543.23	1220.93
RPA3	-0.770318	-0.931072	1	0	RPA3_1416	pool11	-0.343904	-2.32952	1.64171	526.221	1307.43	replication protein A3
RUVBL2	-0.00104356	-0.732828	0	0	RUVBL2_509	pool12	-0.345721	-0.841181	0.149738	295.616	164.98	RuvB-like AAA ATPase 2
EYA3	-0.0544822	-0.267044	1	1	EYA3_5156	pool12	-0.346827	0.62649	-1.32014	166.984	256.907	EYA transcriptional coactivator and phosphatase 3
MORF4L1	-0.294136	-0.415895	0	1	MORF4L1_651	pool13	-0.347558	-0.991979	0.296862	1078.14	994.763	mortality factor 4 like 1
POLR2E	-0.0236042	0.298864	0	3	POLR2E_1245	pool12	-0.351322	-0.124743	-0.577901	4269.48	3256.94	polymerase (RNA) II (DNA directed) polypeptide E, 25kDa
ERCC5	-0.172114	-0.0499274	1	2	ERCC5_1613	pool12	-0.351795	-0.119618	-0.583971	26.7002	24.3063	excision repair cross-complementation group 5
CDC14B	-0.0155177	0.284582	0	2	CDC14B_151	pool12	-0.3551	-0.231266	-0.478933	2735.62	2085.12	cell division cycle 14B
NCOA6	-0.433563	-0.387534	2	0	NCOA6_6650	pool12	-0.359773	-0.663325	-0.0562205	1063.88	730.647	nuclear receptor coactivator 6
CEBPG	-0.129596	0.00309449	0	0	CEBPG_627	pool11	-0.36022	1.03145	-1.75189	1369.29	1419.34	CCAAT/enhancer binding protein gamma
SHFM1	-0.393941	-0.227019	1	0	SHFM1_121	pool11	-0.360987	-1.18668	0.464701	152.659	67.1505	split hand/foot malformation (ectrodactyly) type 1
LIG4	-0.891435	-1.61979	2	0	LIG4_882	pool13	-0.361622	-0.434971	-0.288273	2413.46	1879.52	ligase IV, DNA, ATP-dependent
TIPRL	-0.954286	-0.789949	1	0	TIPRL_362	pool13	-0.36486	-0.686393	-0.0433275	1194.83	923.003	TOR signaling pathway regulator
KDM1A	-0.100344	0.114074	0	2	KDM1A_1034	pool12	-0.365271	2.07426	-2.8048	73.5291	298.65	lysine demethylase 1A
PSMA8	-0.668775	-0.940437	1	0	PSMA8_1417	pool13	-0.366544	0.401326	-1.13441	371.677	361.369	proteasome subunit alpha 8
EGLN3	-0.188023	-0.143694	1	2	EGLN3_2516	pool12	-0.36788	-0.587931	-0.147828	856.646	637.083	egl-9 family hypoxia-inducible factor 3
CLOCK	-0.280337	-0.135311	0	0	CLOCK_294	pool13	-0.369827	-0.885962	0.146308	1018.9	760.982	clock circadian regulator
PHF1	-0.846185	-0.614751	1	0	PHF1_1026	pool13	-0.371031	-0.985262	0.243201	686.599	571.123	PHD finger protein 1
ERCC1	-0.068593	-0.451856	0	0	ERCC1_192	pool11	-0.372252	-0.744503	0	18.638	10.923	excision repair cross-complementation group 1
FMN2	-0.301291	-0.088949	0	0	FMN2_6192	pool13	-0.373422	0.237809	-0.984652	4767.95	3919.04	formin 2
PSMC3	-0.454569	-0.313096	1	1	PSMC3_342	pool13	-0.375067	0.497627	-1.24776	376.65	302.56	proteasome 26S subunit, ATPase 3
GTF2H2C	-0.0408155	0.56607	0	1	GTF2H2C_1406	pool13	-0.379287	1.60834	-2.36691	564.123	1238.94	GTF2H2 family member C
PSMB3	-0.0437355	0.120102	0	1	PSMB3_640	pool11	-0.381889	2.95903	-3.72281	23.5365	47.9369	proteasome subunit beta 3
DCLRE1A	-0.8041	-1.59517	1	0	DCLRE1A_3203	pool13	-0.382018	-0.718815	-0.0452198	1430.91	1104.59	DNA cross-link repair 1A
MUTYH	-0.0190427	-0.883392	1	1	MUTYH_1605	pool11	-0.388993	-1.57004	0.792055	1456.5	1226.96	mutY DNA glycosylase
FANCF	-0.394049	-0.290221	0	0	FANCF_2567	pool11	-0.390026	-0.581085	-0.198968	861.54	634.336	Fanconi anemia complementation group F
RAD51AP1	-0.2909	-0.253599	0	0	RAD51AP1_1713	pool11	-0.392578	-0.102107	-0.683049	3374.1	2629.62	RAD51 associated protein 1
USP1	-0.122053	0.0207704	0	1	USP1_960	pool11	-0.393819	2.82136	-3.609	22.8915	125.25	ubiquitin specific peptidase 1
NIPBL	-0.242984	0.10824	0	0	NIPBL_1981	pool11	-0.396731	-1.16931	0.375853	2506.18	2306.47	Nipped-B homolog (Drosophila)
APTX	-0.0734003	-0.104191	0	1	APTX_1502	pool12	-0.397405	-0.2093	-0.58551	88.6681	76.3607	aprataxin
POLK	-0.0439277	-0.708853	0	1	POLK_4435	pool13	-0.39898	-0.320627	-0.477333	20241.7	15393.1	polymerase (DNA directed) kappa
INO80E	-0.0488568	0.364416	0	0	INO80E_119	pool12	-0.399586	-0.799173	0	323.287	185.573	INO80 complex subunit E
MNDA	-0.227019	-0.237772	0	0	MNDA_1365	pool11	-0.402347	0	-0.804695	0.373388	0	myeloid cell nuclear differentiation antigen
CCNK	-0.0191788	0.324588	0	0	CCNK_2572	pool12	-0.403015	-0.190487	-0.615543	1078.04	829.529	cyclin K
RBM14	-0.0297926	0.325139	0	2	RBM14_1420	pool12	-0.40454	-0.809079	0	160.725	91.5185	RNA binding motif protein 14
MRE11A	-0.139542	-0.163929	0	0	MRE11A_4841	pool12	-0.404742	0.602585	-1.41207	11735.4	8245.97	MRE11 homolog A, double strand break repair nuclease
SETD8	-0.527097	-1.00524	1	1	SETD8_1826	pool12	-0.407816	-0.0512397	-0.764392	2146.8	1782.16
APEX1	-0.254223	-0.246494	0	0	APEX1_557	pool11	-0.411154	-0.317414	-0.504895	5449.1	4125.39	APEX nuclease (multifunctional DNA repair enzyme) 1
OGG1	-1.4698	-0.649752	1	0	OGG1_213	pool13	-0.411495	0.544299	-1.36729	2618.82	2177.69	8-oxoguanine DNA glycosylase
MRPS35	-0.152057	0.0736061	1	2	MRPS35_770	pool13	-0.414045	-1.77704	0.948945	432.873	566.537	mitochondrial ribosomal protein S35
KIAA0101	-0.350373	-0.35047	1	0	KIAA0101_502	pool11	-0.41533	0.0631619	-0.893823	2396.45	1893.78	KIAA0101
GRB2	-0.144299	0.0257647	0	0	GRB2_2396	pool13	-0.416492	0.118738	-0.951723	717.798	626.038	growth factor receptor bound protein 2
FGF10	-0.814741	-1.03621	1	0	FGF10_504	pool13	-0.419419	-0.52	-0.318838	212.758	159.851	fibroblast growth factor 10
SETMAR	-0.0238794	-0.381638	0	0	SETMAR_876	pool13	-0.421362	-0.897504	0.0547803	268.546	194.735	SET domain and mariner transposase fusion gene
ZRANB3	-0.351152	-0.664542	1	0	ZRANB3_475	pool13	-0.421811	-0.127352	-0.716269	153.657	121.645	zinc finger RANBP2-type containing 3
UPF1	-0.212115	-0.0594337	0	1	UPF1_1047	pool12	-0.421876	-0.843753	0	104.333	57.9124	UPF1 regulator of nonsense transcripts homolog (yeast)
SMC3	-0.0968557	-0.69229	1	1	SMC3_1442	pool12	-0.424281	0.0968562	-0.945417	1462.8	867.728	structural maintenance of chromosomes 3
MCL1	-0.137094	-0.0408155	0	1	MCL1_1936	pool11	-0.424485	0.514417	-1.36339	1826.77	1499.55	myeloid cell leukemia 1
MAP2K6	-1.37469	-1.26841	1	0	MAP2K6_1629	pool13	-0.425302	0.194561	-1.04516	2760.39	2059.87	mitogen-activated protein kinase kinase 6
NCOA6	-0.433563	-0.387534	2	0	NCOA6_4926	pool12	-0.427174	0.410838	-1.26519	1926.66	1539.69	nuclear receptor coactivator 6
POLQ	-0.388383	-0.267687	0	1	POLQ_4307	pool11	-0.427925	-0.367099	-0.488751	3183.57	2355.99	polymerase (DNA directed), theta
TRIM32	-1.04624	-0.497846	1	0	TRIM32_3314	pool13	-0.429278	-2.21348	1.35493	1088.75	1137.58	tripartite motif containing 32
FMN2	-0.301291	-0.088949	0	0	FMN2_5839	pool13	-0.429677	1.59974	-2.4591	859.329	604.422	formin 2
TFDP3	-0.369776	-0.497846	0	0	TFDP3_917	pool13	-0.43251	0.480461	-1.34548	4026.89	3239.23	transcription factor Dp family member 3
EPHA2	-0.0268259	0.0695604	0	1	EPHA2_734	pool11	-0.434714	-0.945411	0.0759826	17.4774	8.9622	EPH receptor A2
MLH1	-0.130944	-0.822464	0	0	MLH1_356	pool11	-0.43551	0.126214	-0.997235	2552.81	2198.44	mutL homolog 1
DEM1	-0.0157878	-2.50864	0	0	DEM1_1881	pool13	-0.436558	1.18896	-2.06208	629.915	666.065
UBE2N	-0.080765	0.17192	0	0	UBE2N_2336	pool13	-0.437363	0.124498	-0.999223	702.627	533.319	ubiquitin conjugating enzyme E2N
CCNK	-0.0191788	0.324588	0	0	CCNK_636	pool12	-0.438737	-0.293503	-0.583971	126.258	102.721	cyclin K
SMYD2	-0.293965	-0.0543837	0	1	SMYD2_338	pool13	-0.443031	0.792854	-1.67892	916.812	669.855	SET and MYND domain containing 2
SIRT1	-0.0859214	0.120216	0	1	SIRT1_1820	pool13	-0.446453	-0.781244	-0.111663	481.655	346.67	sirtuin 1
HUS1B	-0.330683	-0.217098	2	1	HUS1B_802	pool13	-0.446552	-3.43443	2.54132	553.665	1755.42	HUS1 checkpoint clamp component B
GTF2H2	-0.0456127	0.820448	0	0	GTF2H2_939	pool12	-0.447857	-0.236831	-0.658884	594.709	475.686	general transcription factor IIH subunit 2
POLG2	-0.196543	-0.0180003	0	1	POLG2_770	pool11	-0.44962	-1.71508	0.815835	1338.95	1128.88	polymerase (DNA directed), gamma 2, accessory subunit
ATM	-0.00493547	-0.522011	1	1	ATM_12581	pool12	-0.450913	-0.316316	-0.58551	265.374	212.793	ATM serine/threonine kinase
DTL	-0.0286314	-1.49894	0	0	DTL_533	pool11	-0.452185	-0.297668	-0.606702	1179.65	885.685	denticleless E3 ubiquitin protein ligase homolog
ACTR8	-0.179339	-1.06098	0	0	ACTR8_2037	pool12	-0.455244	0.0231919	-0.93368	3878.25	2575.01	ARP8 actin-related protein 8 homolog (yeast)
INO80	-0.939302	-1.03527	0	0	INO80_2485	pool13	-0.455517	-5.34097	4.42994	112.25	1665.25	INO80 complex subunit
DNAJA1	-0.12907	-0.565591	1	0	DNAJA1_744	pool13	-0.460444	-0.778333	-0.142556	1285.89	915.711	DnaJ heat shock protein family (Hsp40) member A1
CSNK1D	-0.555019	-0.337148	0	0	CSNK1D_1675	pool11	-0.461045	0.135527	-1.05762	1049.01	804.794	casein kinase 1 delta
BAZ1B	-0.333014	-0.648011	1	0	BAZ1B_2230	pool13	-0.463205	0.151814	-1.07822	1734.95	1410.14	bromodomain adjacent to zinc finger domain 1B
LYN	-0.050854	0.453087	0	2	LYN_2842	pool11	-0.468447	-2.43851	1.50162	375.079	241.683	LYN proto-oncogene, Src family tyrosine kinase
UBE2W	-0.890421	-1.51145	1	0	UBE2W_3955	pool13	-0.468974	-0.545376	-0.392571	5862.93	4248.61	ubiquitin conjugating enzyme E2W (putative)
IFI16	-0.281997	-0.166152	0	0	IFI16_1198	pool11	-0.470441	0.614656	-1.55554	1647.68	1439.56	interferon, gamma-inducible protein 16
MAPK14	-0.176461	-0.289544	0	1	MAPK14_764	pool12	-0.470866	-0.941732	0	43.9009	22.6154	mitogen-activated protein kinase 14
INTS7	-0.185486	-0.0230085	0	1	INTS7_650	pool12	-0.476646	0.632547	-1.58584	652.61	1009.25	integrator complex subunit 7
TRIAP1	-0.126215	-0.124591	0	1	TRIAP1_171	pool11	-0.486607	-0.986344	0.0131305	461.207	352.144	TP53 regulated inhibitor of apoptosis 1
CHCHD6	-0.368049	-0.853872	0	0	CHCHD6_901	pool13	-0.490539	-0.523443	-0.457636	505.37	361.085	coiled-coil-helix-coiled-coil-helix domain containing 6
NDNL2	-0.170761	0.0357404	0	2	NDNL2_883	pool12	-0.490849	-1.61547	0.633767	161.893	53.08
NPM1	-0.280337	-0.562884	0	0	NPM1_323	pool11	-0.492324	-0.179954	-0.804695	44.1615	38.5945	nucleophosmin (nucleolar phosphoprotein B23, numatrin)
TAOK1	-0.114074	-0.140802	1	1	TAOK1_10008	pool12	-0.494816	0.436725	-1.42636	2400.74	1893.3	TAO kinase 1
PSMB6	-0.140501	-0.201004	0	1	PSMB6_756	pool12	-0.495746	-1.62526	0.633767	2.27003	0.979947	proteasome subunit beta 6
PSME4	-0.154964	-0.186686	0	0	PSME4_2146	pool11	-0.496452	-0.535166	-0.457739	0.411248	0	proteasome activator subunit 4
MLH1	-0.130944	-0.822464	0	0	MLH1_2111	pool11	-0.496452	-0.535166	-0.457739	0.411248	0	mutL homolog 1
UNG	-0.20412	-0.209082	0	1	UNG_864	pool11	-0.49884	-0.997679	0	78.1449	38.8857	uracil DNA glycosylase
FMN2	-0.301291	-0.088949	0	0	FMN2_6369	pool13	-0.499359	0.0822327	-1.08095	2070.38	1713.85	formin 2
PHLDA3	-0.160396	0.0166895	0	2	PHLDA3_686	pool12	-0.50072	-1.22066	0.219225	1098.39	471.465	pleckstrin homology like domain family A member 3
TCEA1	-0.0296531	-0.830326	1	1	TCEA1_2070	pool12	-0.503119	-1.41924	0.413003	73.4743	27.3254	transcription elongation factor A1
HIC1	-2.40894	-0.940058	2	0	HIC1_2988	pool13	-0.505092	5.32195	-6.33213	40.3244	41.1177	hypermethylated in cancer 1
RAD1	-0.0856568	0.24504	0	1	RAD1_541	pool12	-0.505695	0.349041	-1.36043	1777.16	1574.91	RAD1 checkpoint DNA exonuclease
FOXM1	-1.79048	-0.881405	2	0	FOXM1_1274	pool11	-0.505848	6.59305	-7.60474	140.394	47.9936	forkhead box M1
SETX	-0.587876	-0.701584	0	0	SETX_115	pool12	-0.507427	0.209255	-1.22411	1371.52	1071.92	senataxin
IKBKE	-0.0323584	-0.166152	0	2	IKBKE_2111	pool11	-0.508726	-0.664582	-0.35287	4443.43	3146.34	inhibitor of kappa light polypeptide gene enhancer in B-cells, kinase epsilon
HMGB2	-0.55705	-0.322484	1	1	HMGB2_1287	pool11	-0.513401	-0.0774738	-0.949329	18191.1	13329.2	high mobility group box 2
MNDA	-0.227019	-0.237772	0	0	MNDA_1167	pool11	-0.51501	-0.07604	-0.953981	3219.85	2436.96	myeloid cell nuclear differentiation antigen
PARG	-0.809388	-1.25727	2	0	PARG_2511	pool13	-0.515313	-1.03063	0	23.2384	11.1199	poly(ADP-ribose) glycohydrolase
NUPR1	-0.73189	-0.389979	1	0	NUPR1_227	pool11	-0.517312	-0.244397	-0.790227	228.771	178.634	nuclear protein 1, transcriptional regulator
AATF	-0.397181	-0.962175	1	0	AATF_1835	pool11	-0.518976	-1.72484	0.686886	856.959	709.017	apoptosis antagonizing transcription factor
MNDA	-0.227019	-0.237772	0	0	MNDA_1119	pool11	-0.52123	1.25999	-2.30245	202.468	127.49	myeloid cell nuclear differentiation antigen
EGFR	-0.465213	-1.3279	1	0	EGFR_397	pool11	-0.524232	-2.27681	1.22834	38.6233	8.24474	epidermal growth factor receptor
INO80C	-0.00252624	-0.189029	0	0	INO80C_722	pool13	-0.524461	-3.61324	2.56432	157.277	336.463	INO80 complex subunit C
NSMCE2	-0.223444	-0.200935	0	0	NSMCE2_467	pool12	-0.527038	-0.883107	-0.170968	216.631	117.259	NSE2/MMS21 homolog, SMC5-SMC6 complex SUMO ligase
PRPF19	-0.920819	-0.999566	2	0	PRPF19_1580	pool13	-0.528172	6.7628	-7.81914	121.606	1051.48	pre-mRNA processing factor 19
NKX3-1	-2.30103	-1.99568	2	0	NKX3-1_574	pool13	-0.529717	-1.07915	0.0197119	767.746	657.718	NK3 homeobox 1
FBXO31	-0.115148	0.0699684	0	1	FBXO31_454	pool12	-0.532616	0.517748	-1.58298	145.742	207.449	F-box protein 31
TFAP4	-1.49349	-0.209082	0	1	TFAP4_2098	pool13	-0.533367	0.470819	-1.53755	820.048	869.551	transcription factor AP-4 (activating enhancer binding protein 4)
RAD21	-0.145269	-0.203148	0	0	RAD21_1944	pool13	-0.533635	1.41936	-2.48663	88.1796	115.539	RAD21 cohesin complex component
PHLDA3	-0.160396	0.0166895	0	2	PHLDA3_1210	pool12	-0.538698	-1.22713	0.149738	165.934	70.8197	pleckstrin homology like domain family A member 3
RNF168	-0.295078	-0.257511	1	0	RNF168_995	pool13	-0.538966	0.347351	-1.42528	445.718	309.734	ring finger protein 168, E3 ubiquitin protein ligase
MCTS1	-0.120445	-0.20294	0	0	MCTS1_6017	pool13	-0.542507	-0.88219	-0.202825	5571.25	3836.64	malignant T-cell amplified sequence 1
SFN	-0.383419	-1.64397	2	0	SFN_696	pool13	-0.545244	-2.80908	1.71859	566.53	417.827	stratifin
PGAP2	-0.0143939	-0.476774	0	1	PGAP2_1180	pool12	-0.546471	-0.0698791	-1.02306	5019.06	3391.92	post-GPI attachment to proteins 2
EYA4	-0.0331077	0.056555	0	0	EYA4_5388	pool12	-0.546591	-0.0835317	-1.00965	10513.2	6785.39	EYA transcriptional coactivator and phosphatase 4
XRCC6	-0.210278	-0.523458	0	0	XRCC6_1599	pool12	-0.548813	-0.473531	-0.624096	7822.15	5309.42	X-ray repair complementing defective repair in Chinese hamster cells 6
PSMD4	-0.23381	-0.437113	1	1	PSMD4_1173	pool13	-0.550471	-0.249008	-0.851934	1108.72	853.608	proteasome 26S subunit, non-ATPase 4
TP63	-0.733298	-0.718739	0	0	TP63_1008	pool13	-0.552637	-1.49245	0.387182	367.212	338.194	tumor protein p63
TLK1	-1.27901	-0.703116	1	0	TLK1_4237	pool13	-0.552642	-1.22907	0.123787	1232.27	917.367	tousled like kinase 1
STK11	-0.299816	-0.457673	0	0	STK11_1449	pool12	-0.554643	-1.25902	0.149738	60.131	25.0605	serine/threonine kinase 11
MLH1	-0.130944	-0.822464	0	0	MLH1_355	pool11	-0.554718	-1.46699	0.357554	546.681	388.471	mutL homolog 1
TP53	-0.226945	-0.0992506	0	1	TP53_326	pool11	-0.557304	-0.0331777	-1.08143	622.354	478.559	tumor protein p53
ERCC6	-0.286425	-2.14267	2	1	ERCC6_5594	pool13	-0.557863	0.848412	-1.96414	1909.55	1551.8	excision repair cross-complementation group 6
USP3	-0.560983	-0.352128	0	0	USP3_397	pool11	-0.559069	-1.10298	-0.0151558	1282.42	969.289	ubiquitin specific peptidase 3
PSMB10	-0.203634	0.0143041	0	1	PSMB10_737	pool12	-0.560185	-1.53337	0.413003	37.6556	12.8473	proteasome subunit beta 10
MDM4	-0.0109508	0.264641	0	2	MDM4_2689	pool12	-0.560325	-0.206088	-0.914563	1410.37	858.691	MDM4, p53 regulator
TIMELESS	-0.291069	-0.0312836	0	1	TIMELESS_1561	pool11	-0.56119	0.89111	-2.01349	317.266	283.949	timeless circadian clock
H2AFX	-0.410274	-0.42435	1	0	H2AFX_1434	pool12	-0.56342	-1.86055	0.733709	232.73	64.0562	H2A histone family member X
INO80E	-0.0488568	0.364416	0	0	INO80E_118	pool12	-0.564047	-1.12809	0	1.2858	0.317039	INO80 complex subunit E
RASSF1	-0.993106	-0.530767	0	0	RASSF1_43	pool11	-0.565163	-0.849534	-0.280793	836.587	540.416	Ras association domain family member 1
RAD51AP1	-0.2909	-0.253599	0	0	RAD51AP1_845	pool11	-0.565469	-0.924339	-0.206599	2918.46	2018.28	RAD51 associated protein 1
APTX	-0.0734003	-0.104191	0	1	APTX_879	pool12	-0.570979	0.607725	-1.74968	177.208	142.046	aprataxin
PMAIP1	-0.280586	-0.0669685	0	0	PMAIP1_1785	pool11	-0.571185	0.921794	-2.06416	1870.86	1459.24	phorbol-12-myristate-13-acetate-induced protein 1
CCNA2	-0.0279824	0.0600317	0	2	CCNA2_808	pool11	-0.5721	-1.06848	-0.0757171	2746.56	2037.36	cyclin A2
RAD9B	-0.175939	0.239879	0	2	RAD9B_1027	pool12	-0.572705	-2.861	1.71559	855.677	2170.6	RAD9 checkpoint clamp component B
STRA13	-0.203634	-1.37779	0	1	STRA13_699	pool12	-0.576423	-0.565795	-0.587051	356.797	240.707	stimulated by retinoic acid 13
ZAK	-0.637706	-0.517984	1	0	ZAK_597	pool12	-0.580953	-0.990938	-0.170968	111.012	55.6475
SLX4	-0.214314	-0.261775	0	1	SLX4_5080	pool13	-0.582447	-0.487488	-0.677406	6584.67	4442.47	SLX4 structure-specific endonuclease subunit
POLR2K	-0.495257	-0.512862	0	0	POLR2K_231	pool13	-0.582471	-0.163153	-1.00179	2909.72	2046.71	polymerase (RNA) II (DNA directed) polypeptide K, 7.0kDa
MAPKAPK2	-0.0975076	0.388489	1	2	MAPKAPK2_756	pool12	-0.585906	0.451757	-1.62357	166.239	171.256	mitogen-activated protein kinase-activated protein kinase 2
MGMT	-0.0635365	0.240861	0	0	MGMT_402	pool13	-0.594072	-0.0354608	-1.15268	118.889	81.4207	O-6-methylguanine-DNA methyltransferase
FANCM	-0.0503173	-0.16698	0	1	FANCM_5176	pool12	-0.597119	-0.120287	-1.07395	2090.56	1446.31	Fanconi anemia complementation group M
RAD23A	-1.36251	-1.24489	1	0	RAD23A_176	pool13	-0.597242	-0.782886	-0.411597	0.525364	0	RAD23 homolog A, nucleotide excision repair protein
POLM	-0.815593	-0.373352	1	1	POLM_2119	pool11	-0.600024	1.72971	-2.92976	10.763	15.0116	polymerase (DNA directed), mu
PAPD7	-0.0117087	-0.282163	1	1	PAPD7_356	pool13	-0.604355	-0.940016	-0.268694	981.721	668.864	PAP associated domain containing 7
JMY	-0.283663	-0.2423	0	1	JMY_5576	pool13	-0.604888	-1.89329	0.683511	1562.02	1312.43	junction mediating and regulatory protein, p53 cofactor
XRCC3	-0.114752	-0.200315	0	0	XRCC3_320	pool12	-0.605355	-0.212197	-0.998513	68.279	58.4408	X-ray repair complementing defective repair in Chinese hamster cells 3
RAD17	-0.4133	-0.663941	0	0	RAD17_2109	pool12	-0.608121	0.103901	-1.32014	94.4281	100.713	RAD17 checkpoint clamp loader component
RPS6KA6	-1.14267	-0.445753	1	0	RPS6KA6_6884	pool13	-0.608891	0.479104	-1.69689	559.619	440.344	ribosomal protein S6 kinase, 90kDa, polypeptide 6
NEIL3	-0.303207	-0.228192	2	0	NEIL3_519	pool11	-0.613996	-0.23719	-0.990803	1222.24	801.515	nei like DNA glycosylase 3
SGK1	-0.195929	-0.229958	1	0	SGK1_1622	pool12	-0.614929	-1.22986	0	191.033	81.1619	serum/glucocorticoid regulated kinase 1
POLI	-0.197774	-0.139363	0	0	POLI_5001	pool11	-0.615509	-1.23102	0	0.673663	0	polymerase (DNA directed) iota
FEN1	-0.0198148	0.677161	0	2	FEN1_1572	pool12	-0.618694	0.700656	-1.93804	5556.38	3795.58	flap structure-specific endonuclease 1
NBN	-0.304956	-0.0526643	0	0	NBN_858	pool11	-0.618839	0.851926	-2.0896	1466.9	1638.49	nibrin
PSMB3	-0.0437355	0.120102	0	1	PSMB3_187	pool11	-0.622311	7.1913	-8.43592	250.619	138.436	proteasome subunit beta 3
NDNL2	-0.170761	0.0357404	0	2	NDNL2_1150	pool12	-0.623695	0.826686	-2.07408	199.359	338.261
ATMIN	-1.06956	-0.602929	1	0	ATMIN_3517	pool13	-0.627055	-2.83568	1.58157	53.1979	45.6945	ATM interactor
NBN	-0.304956	-0.0526643	0	0	NBN_1890	pool11	-0.629057	-0.0441072	-1.21401	1186.3	825.665	nibrin
MSX1	-0.269218	-0.144966	0	1	MSX1_1842	pool11	-0.630241	3.76057	-5.02105	60.3008	217.17	msh homeobox 1
DEK	-0.870632	-0.433798	2	0	DEK_829	pool11	-0.630596	0.013659	-1.27485	1464.62	1018.31	DEK proto-oncogene
PSMD3	-0.18923	-0.464453	0	1	PSMD3_489	pool12	-0.637404	-1.27481	0	281.223	115.93	proteasome 26S subunit, non-ATPase 3
WRN	-0.446724	-0.235226	0	0	WRN_5040	pool11	-0.637972	-0.113616	-1.16233	4221.25	2865.69	Werner syndrome RecQ like helicase
ABL1	-0.291154	-0.50515	0	1	ABL1_787	pool11	-0.641857	-1.71037	0.426656	626.714	566.316	ABL proto-oncogene 1, non-receptor tyrosine kinase
XRCC6	-0.210278	-0.523458	0	0	XRCC6_1682	pool12	-0.643092	-0.702212	-0.583971	40.1093	24.3063	X-ray repair complementing defective repair in Chinese hamster cells 6
SIRT6	-0.289544	-0.679646	1	1	SIRT6_487	pool12	-0.643417	-1.69984	0.413003	51.2483	15.5949	sirtuin 6
FANCA	-0.00722564	0.373968	0	0	FANCA_473	pool12	-0.647005	-0.708499	-0.58551	349.134	213.321	Fanconi anemia complementation group A
DYRK2	-0.219035	-0.0952304	1	2	DYRK2_4338	pool12	-0.649955	-1.12894	-0.170968	436.503	199.372	dual specificity tyrosine phosphorylation regulated kinase 2
UPF1	-0.212115	-0.0594337	0	1	UPF1_3716	pool12	-0.653128	-0.307743	-0.998513	204.023	164.332	UPF1 regulator of nonsense transcripts homolog (yeast)
GTF2H5	-0.452718	-0.552377	0	0	GTF2H5_7379	pool13	-0.653328	-0.492797	-0.81386	4752.93	3063.32	general transcription factor IIH subunit 5
FBXO6	-0.903785	-0.689732	0	0	FBXO6_1282	pool13	-0.659923	6.18736	-7.50721	90.8235	62.1938	F-box protein 6
LRDD	-0.299642	-0.502103	0	0	LRDD_673	pool12	-0.666615	-0.334717	-0.998513	98.5871	77.6745
POLM	-0.815593	-0.373352	1	1	POLM_2129	pool11	-0.668354	0.0185271	-1.35524	964.341	844.579	polymerase (DNA directed), mu
MSH6	-0.477165	-0.247107	0	0	MSH6_2742	pool11	-0.670126	-0.882513	-0.457739	80.3525	43.2549	mutS homolog 6
BARD1	-0.0279361	-0.234108	0	0	BARD1_1691	pool11	-0.672098	0.403098	-1.74729	1897.91	1198	BRCA1 associated RING domain 1
FBXO6	-0.903785	-0.689732	0	0	FBXO6_1187	pool13	-0.674794	-0.495364	-0.854224	952.849	601.062	F-box protein 6
CDCA5	-0.16845	-0.341416	1	1	CDCA5_809	pool12	-0.676524	-1.50279	0.149738	271.002	95.5487	cell division cycle associated 5
TDP1	-0.00682839	-0.245422	1	1	TDP1_1815	pool12	-0.678709	-0.773446	-0.583971	239.776	139.92	tyrosyl-DNA phosphodiesterase 1
CEP164	-0.316503	-1.34582	1	2	CEP164_1988	pool11	-0.679053	-0.0554057	-1.3027	4703.77	3199.13	centrosomal protein 164kDa
BAZ1B	-0.333014	-0.648011	1	0	BAZ1B_5562	pool13	-0.680649	-0.941843	-0.419454	3574.61	2287.69	bromodomain adjacent to zinc finger domain 1B
SMC4	-0.448916	-0.309627	0	0	SMC4_4873	pool11	-0.683503	-0.302164	-1.06484	7545.37	4877.83	structural maintenance of chromosomes 4
LIG4	-0.891435	-1.61979	2	0	LIG4_3305	pool13	-0.685462	-0.360476	-1.01045	1083.08	680.583	ligase IV, DNA, ATP-dependent
PSMD13	-0.0800855	-0.353204	1	1	PSMD13_649	pool11	-0.687293	-0.0630283	-1.31156	2119.23	1608.12	proteasome 26S subunit, non-ATPase 13
DEM1	-0.0157878	-2.50864	0	0	DEM1_1657	pool13	-0.688298	-1.41131	0.0347144	4259.69	2513.58
RAD21L1	-1.40121	-0.517698	1	0	RAD21L1_675	pool13	-0.689558	3.1554	-4.53451	15.6975	5.75109	RAD21 cohesin complex component like 1
POLK	-0.0439277	-0.708853	0	1	POLK_713	pool13	-0.691261	-0.144691	-1.23783	1365.02	868.626	polymerase (DNA directed) kappa
ABL1	-0.291154	-0.50515	0	1	ABL1_158	pool11	-0.691841	0.307828	-1.69151	3231.83	2121.56	ABL proto-oncogene 1, non-receptor tyrosine kinase
MEIR5	-0.196953	0.0134522	0	0	MEIR5_1378	pool13	-0.694374	0.122518	-1.51127	6537.16	4612.2
DMAP1	-1.40782	-0.776764	1	0	DMAP1_526	pool13	-0.695904	-0.845447	-0.54636	977.589	635.37	DNA methyltransferase 1 associated protein 1
RTEL1	-0.428408	-0.439496	0	0	RTEL1_1594	pool12	-0.697466	-0.31411	-1.08082	1271.22	836.09	regulator of telomere elongation helicase 1
SETX	-0.587876	-0.701584	0	0	SETX_3936	pool12	-0.697949	-1.80733	0.411433	170.041	48.9128	senataxin
VAV3	-0.0357404	0.73189	0	1	VAV3_2674	pool12	-0.698087	0.40689	-1.80306	2892.61	1498.01	vav guanine nucleotide exchange factor 3
C10orf90	-0.344958	-0.0982149	0	0	C10orf90_3036	pool13	-0.70076	1.23185	-2.63337	1584.94	1659.74	chromosome 10 open reading frame 90
NONO	-0.35164	-0.193142	0	0	NONO_1092	pool11	-0.703269	-0.528771	-0.877767	906.137	547.762	non-POU domain containing, octamer-binding
POLD4	-0.681311	-0.879755	0	0	POLD4_713	pool11	-0.707456	-1.30549	-0.109424	662.595	273.691	polymerase (DNA-directed), delta 4, accessory subunit
BAX	-0.36221	-0.208029	1	0	BAX_209	pool11	-0.707696	2.70803	-4.12342	8.21454	2.76715	BCL2-associated X protein
CXCL12	-0.820736	-0.637518	0	0	CXCL12_222	pool13	-0.707956	0.7731	-2.18901	314.743	200.209	chemokine (C-X-C motif) ligand 12
BRCA1	-0.519562	-0.419303	2	0	BRCA1_41	pool11	-0.708806	-0.622893	-0.794718	5918.16	3640.76	breast cancer 1
ACD	-1.266	-0.533874	1	0	ACD_1010	pool13	-0.709898	0.363271	-1.78307	606.618	456.603	adrenocortical dysplasia homolog (mouse)
RFC1	-0.736601	-0.52491	1	0	RFC1_3887	pool11	-0.710272	-0.785536	-0.635008	4547.81	2777.87	replication factor C subunit 1
GTF2H5	-0.452718	-0.552377	0	0	GTF2H5_5892	pool13	-0.711206	-1.39694	-0.0254767	2463.42	1732.55	general transcription factor IIH subunit 5
DCLRE1C	-0.644357	-0.399463	1	0	DCLRE1C_2973	pool11	-0.72432	0.286999	-1.73564	93.3546	89.964	DNA cross-link repair 1C
MAPK3	-1.60033	-0.796967	2	0	MAPK3_1174	pool13	-0.72441	-0.73366	-0.71516	420.637	254.68	mitogen-activated protein kinase 3
MDM2	-0.248644	-0.0416751	0	1	MDM2_2735	pool12	-0.726347	-0.132551	-1.32014	186.271	169.193	MDM2 proto-oncogene, E3 ubiquitin protein ligase
UBE2D3	-0.116736	-0.0180908	0	1	UBE2D3_1849	pool11	-0.731436	-0.160219	-1.30265	1094.96	718.878	ubiquitin conjugating enzyme E2D 3
CEP63	-4	-0.787812	2	0	CEP63_1288	pool13	-0.732249	2.54284	-4.00734	418.715	590.878	centrosomal protein 63kDa
TP53BP1	-0.0538918	-0.120159	0	0	TP53BP1_5912	pool12	-0.733382	0.927882	-2.39465	137.454	250.444	tumor protein p53 binding protein 1
H2AFX	-0.410274	-0.42435	1	0	H2AFX_1435	pool12	-0.734584	-1.46917	0	1.46949	0.211359	H2A histone family member X
TYMS	-0.389872	-0.114469	0	1	TYMS_578	pool11	-0.734819	-0.51901	-0.950628	876.96	501.368	thymidylate synthetase
PPP2R5C	-0.0867691	0.107405	0	0	PPP2R5C_623	pool12	-0.735051	-1.4701	0	49.7788	17.6485	protein phosphatase 2 regulatory subunit B', gamma
ZBTB32	-0.442613	-1.23136	2	0	ZBTB32_27	pool13	-0.738903	3.5532	-5.031	31.3398	187.228	zinc finger and BTB domain containing 32
SHFM1	-0.393941	-0.227019	1	0	SHFM1_120	pool11	-0.740034	1.72384	-3.20391	4.33182	1.89331	split hand/foot malformation (ectrodactyly) type 1
POLR2I	-0.418733	-0.301551	0	0	POLR2I_491	pool13	-0.743169	0.0805125	-1.56685	168.819	98.8259	polymerase (RNA) II (DNA directed) polypeptide I, 14.5kDa
MACROD2	-0.038484	-0.319211	0	1	MACROD2_307	pool13	-0.743654	-0.0980121	-1.38929	1942.4	1278.39	MACRO domain containing 2
RDM1	-0.0507076	0.137392	0	0	RDM1_258	pool12	-0.747133	-0.908757	-0.58551	133.671	70.8653	RAD52 motif containing 1
CCND1	-0.180522	-0.076238	1	2	CCND1_1689	pool11	-0.747603	0.274854	-1.77006	696.534	593.634	cyclin D1
XRCC5	-4.34316e-05	0.54806	0	0	XRCC5_967	pool12	-0.748664	-0.459994	-1.03733	2588.11	1552.02	X-ray repair complementing defective repair in Chinese hamster cells 5
RFC4	-0.413863	-0.295506	0	0	RFC4_1062	pool11	-0.750902	-1.12651	-0.375292	1509.65	830.753	replication factor C subunit 4
E2F1	-0.0204972	-0.704873	0	0	E2F1_908	pool12	-0.752094	-1.50419	0	38.3903	13.2099	E2F transcription factor 1
UPF1	-0.212115	-0.0594337	0	1	UPF1_2277	pool12	-0.752147	-1.50429	0	0.918428	0	UPF1 regulator of nonsense transcripts homolog (yeast)
MDM4	-0.0109508	0.264641	0	2	MDM4_3243	pool12	-0.753891	-0.923811	-0.583971	168.506	88.4538	MDM4, p53 regulator
BCLAF1	-0.306537	-0.143452	0	1	BCLAF1_5981	pool13	-0.754323	-1.06278	-0.445867	355.577	201.66	BCL2 associated transcription factor 1
H2AFX	-0.410274	-0.42435	1	0	H2AFX_20	pool12	-0.756398	-1.5128	0	13.5927	4.43854	H2A histone family member X
MDM2	-0.248644	-0.0416751	0	1	MDM2_3926	pool12	-0.757946	-1.34492	-0.170968	96.3171	37.682	MDM2 proto-oncogene, E3 ubiquitin protein ligase
FANCM	-0.0503173	-0.16698	0	1	FANCM_6498	pool12	-0.761291	-0.124205	-1.39838	3525.86	1865.46	Fanconi anemia complementation group M
IKBKE	-0.0323584	-0.166152	0	2	IKBKE_2110	pool11	-0.762185	-1.09511	-0.429257	5.04856	2.4299	inhibitor of kappa light polypeptide gene enhancer in B-cells, kinase epsilon
CRY1	-0.0981604	-0.208801	0	1	CRY1_2715	pool11	-0.762265	-0.197815	-1.32671	4329.2	2857.76	cryptochrome circadian clock 1
PSMA5	-0.24657	-0.0180456	0	1	PSMA5_2757	pool12	-0.763407	0.0126645	-1.53948	5583.27	3302.85	proteasome subunit alpha 5
NPM1	-0.280337	-0.562884	0	0	NPM1_452	pool11	-0.765352	-0.212501	-1.3182	73.7269	62.9163	nucleophosmin (nucleolar phosphoprotein B23, numatrin)
TOPORS	-0.00397017	0.32744	0	1	TOPORS_1803	pool12	-0.766517	-0.949062	-0.583971	231.877	119.735	topoisomerase I binding, arginine/serine-rich, E3 ubiquitin protein ligase
PHF1	-0.846185	-0.614751	1	0	PHF1_1921	pool13	-0.766888	-0.752608	-0.781169	1110.4	651.407	PHD finger protein 1
RBBP8	-1.05948	-0.453211	1	0	RBBP8_210	pool11	-0.767801	0.0771602	-1.61276	5800.17	4328.75	retinoblastoma binding protein 8
OBFC2B	-0.0153827	-0.510886	0	0	OBFC2B_1369	pool12	-0.769006	-0.562498	-0.975515	1685.39	945.178
USP16	-0.104301	-0.10785	0	1	USP16_1591	pool12	-0.769675	-0.134623	-1.40473	1960.79	1726.81	ubiquitin specific peptidase 16
PPP4R2	-1.47237	-1.86328	0	0	PPP4R2_1312	pool13	-0.773801	-0.940372	-0.60723	2532.99	1496.41	protein phosphatase 4 regulatory subunit 2
PSMD10	-0.548828	-0.718967	0	0	PSMD10_673	pool13	-0.775521	-1.12483	-0.426208	2790.62	1701.54	proteasome 26S subunit, non-ATPase 10
EGLN3	-0.188023	-0.143694	1	2	EGLN3_1402	pool12	-0.776534	-1.55307	0	150.439	50.9375	egl-9 family hypoxia-inducible factor 3
PSMB1	-0.343423	-0.324863	0	0	PSMB1_359	pool11	-0.778306	0.0735923	-1.6302	11518.8	7894.16	proteasome subunit beta 1
FTO	-0.680062	-1.7986	1	0	FTO_350	pool13	-0.782284	-5.47871	3.91414	78.9013	781.142	fat mass and obesity associated
CHCHD6	-0.368049	-0.853872	0	0	CHCHD6_900	pool13	-0.784457	-1.73621	0.167296	524.618	397.184	coiled-coil-helix-coiled-coil-helix domain containing 6
MAPK3	-1.60033	-0.796967	2	0	MAPK3_1715	pool13	-0.784715	-4.92025	3.35082	56.1926	388.724	mitogen-activated protein kinase 3
RAD52	-0.0269646	-0.209012	0	1	RAD52_1059	pool12	-0.78766	-2.30903	0.733709	398.414	80.3309	RAD52 homolog, DNA repair protein
UIMC1	-0.0734003	-0.286846	0	1	UIMC1_189	pool11	-0.790389	4.33263	-5.91341	54.1295	231.499	ubiquitin interaction motif containing 1
PSMA6	-0.221126	0.091247	0	1	PSMA6_437	pool12	-0.794655	-0.590797	-0.998513	339.766	225.097	proteasome subunit alpha 6
MCM7	-0.240559	-0.10513	0	0	MCM7_674	pool11	-0.795669	-0.307746	-1.28359	332.628	215.255	minichromosome maintenance complex component 7
CHAF1B	-0.903438	-0.669789	1	0	CHAF1B_262	pool13	-0.79576	-3.53943	1.94791	253.475	573.239	chromatin assembly factor 1 subunit B
NSMCE4A	-0.202732	-0.148803	0	0	NSMCE4A_1004	pool12	-0.796101	-6.05072	4.45852	48.4025	49.1009	NSE4 homolog A, SMC5-SMC6 complex component
DCLRE1A	-0.8041	-1.59517	1	0	DCLRE1A_2037	pool13	-0.796876	-1.08101	-0.512743	1154.46	677.026	DNA cross-link repair 1A
CDKN2A	-0.0163286	0.784891	0	1	CDKN2A_665	pool12	-0.797093	-1.59419	0	124.171	40.7923	cyclin-dependent kinase inhibitor 2A
RAD1	-0.0856568	0.24504	0	1	RAD1_495	pool12	-0.798049	-0.597586	-0.998513	281.722	185.679	RAD1 checkpoint DNA exonuclease
XRCC2	-0.388064	-1.54975	1	0	XRCC2_1789	pool12	-0.798368	-1.59674	0	74.209	24.2006	X-ray repair complementing defective repair in Chinese hamster cells 2
PARP2	-2.03152	-0.614215	1	0	PARP2_206	pool13	-0.80052	-0.352802	-1.24824	629.516	398.586	poly(ADP-ribose) polymerase 2
ATXN3	-0.691649	-0.481749	1	0	ATXN3_2016	pool13	-0.802562	-0.274142	-1.33098	2509.92	1508.81	ataxin 3
UACA	-0.0275195	0.33762	0	1	UACA_3798	pool12	-0.802562	-0.594552	-1.01057	6613.37	3662.25	uveal autoantigen with coiled-coil domains and ankyrin repeats
ZBTB40	-1.47237	-1.03058	2	0	ZBTB40_8620	pool13	-0.803873	0.776593	-2.38434	632.787	605.478	zinc finger and BTB domain containing 40
C17orf70	-0.0842309	-0.244278	0	1	C17orf70_1417	pool12	-0.804259	-1.60852	0	13.5927	4.1215
UVRAG	-0.387428	-0.656986	0	0	UVRAG_1415	pool13	-0.805197	0.463942	-2.07434	939.535	812.22	UV radiation resistance associated
BCL6	-1.03716	-0.544546	0	1	BCL6_2249	pool11	-0.808686	-1.2182	-0.399176	116.411	68.3947	B-cell CLL/lymphoma 6
SFRP2	-1.19654	-1.1549	2	0	SFRP2_735	pool13	-0.809152	0.583136	-2.20144	588.515	408.581	secreted frizzled-related protein 2
FZR1	-4	-0.912574	1	1	FZR1_3120	pool13	-0.809339	-0.922455	-0.696223	79.3117	44.5529	fizzy/cell division cycle 20 related 1
MCM7	-0.240559	-0.10513	0	0	MCM7_52	pool11	-0.811364	0.192779	-1.81551	846.235	774.356	minichromosome maintenance complex component 7
CRADD	-0.720561	-0.236422	0	0	CRADD_993	pool13	-0.819722	-3.80068	2.16124	252.205	783.699	CASP2 and RIPK1 domain containing adaptor with death domain
ATAD5	-0.0242007	0.395774	1	3	ATAD5_1657	pool12	-0.820038	-0.781417	-0.858658	3027.18	1685.79	ATPase family, AAA domain containing 5
MLH3	-0.034422	0.0202241	0	1	MLH3_5185	pool12	-0.822052	-2.05711	0.413003	2.02054	0.271407	mutL homolog 3
SMC1A	-0.118558	0.143392	0	2	SMC1A_8008	pool12	-0.824856	-1.82014	0.170424	2619.28	1660.93	structural maintenance of chromosomes 1A
PSMB11	-0.289883	-0.135074	1	0	PSMB11_531	pool13	-0.824951	7.99552	-9.64542	553.014	127.294	proteasome (prosome, macropain) subunit, beta type, 11
DCLRE1A	-0.8041	-1.59517	1	0	DCLRE1A_3988	pool13	-0.825318	-0.495445	-1.15519	1847.13	1032.16	DNA cross-link repair 1A
FAN1	-0.0378675	0.237997	0	1	FAN1_202	pool13	-0.82793	-1.11096	-0.544903	1340.33	728.864	FANCD2/FANCI-associated nuclease 1
GTF2H3	-0.34113	-0.345823	0	0	GTF2H3_530	pool11	-0.828502	4.26762	-5.92463	39.3023	190.788	general transcription factor IIH subunit 3
C16orf5	-0.160899	-0.370285	0	0	C16orf5_2334	pool13	-0.829353	-1.41268	-0.246022	2532.42	1450.33
TAF9B	-0.351445	-0.339894	0	0	TAF9B_1650	pool13	-0.831984	0.962748	-2.62672	544.289	480.298	TATA-box binding protein associated factor 9b
WRN	-0.446724	-0.235226	0	0	WRN_4794	pool11	-0.838909	-0.282505	-1.39531	7043.48	4339.55	Werner syndrome RecQ like helicase
APEX1	-0.254223	-0.246494	0	0	APEX1_538	pool11	-0.839616	-2.27719	0.597957	2574.61	2409.29	APEX nuclease (multifunctional DNA repair enzyme) 1
NIPBL	-0.242984	0.10824	0	0	NIPBL_3501	pool11	-0.844327	-1.68865	0	311.906	96.4133	Nipped-B homolog (Drosophila)
POLR2H	-0.164944	0.0160581	0	1	POLR2H_193	pool11	-0.845079	2.78221	-4.47237	97.1093	530.138	polymerase (RNA) II (DNA directed) polypeptide H
CASP3	-0.215525	-0.447453	0	0	CASP3_1775	pool11	-0.845145	-0.30456	-1.38573	1730.17	1122.44	caspase 3
RPA1	-0.25602	-0.452471	1	1	RPA1_1838	pool11	-0.84923	-1.69846	0	1.12277	0	replication protein A1
UVRAG	-0.387428	-0.656986	0	0	UVRAG_2662	pool13	-0.853337	-1.09094	-0.615738	1503.53	871.953	UV radiation resistance associated
FANCG	-0.346691	-0.311047	0	0	FANCG_1448	pool11	-0.853649	4.58348	-6.29078	51.2207	312.979	Fanconi anemia complementation group G
ZRANB3	-0.351152	-0.664542	1	0	ZRANB3_2025	pool13	-0.855741	-1.1974	-0.514079	737.491	407.245	zinc finger RANBP2-type containing 3
NONO	-0.35164	-0.193142	0	0	NONO_682	pool11	-0.857395	-0.0186494	-1.69614	1.56927	0.436918	non-POU domain containing, octamer-binding
RFWD3	-0.2909	-0.400008	1	1	RFWD3_842	pool11	-0.858353	-5.17992	3.46321	23.4646	11.3371	ring finger and WD repeat domain 3
RNF8	-0.355758	-0.49147	0	1	RNF8_3829	pool13	-0.859273	-1.54622	-0.172322	3039.57	1863.33	ring finger protein 8, E3 ubiquitin protein ligase
BLM	-0.00121773	0.927383	0	0	BLM_1957	pool11	-0.863388	-0.401148	-1.32563	3553.95	2126.55	Bloom syndrome RecQ like helicase
SMC4	-0.448916	-0.309627	0	0	SMC4_1099	pool11	-0.864561	0.393343	-2.12247	2736.09	1819.16	structural maintenance of chromosomes 4
PARP3	-0.301986	-0.288699	0	1	PARP3_721	pool11	-0.865117	-0.973916	-0.756317	1335.21	726.872	poly(ADP-ribose) polymerase family member 3
SLX4	-0.214314	-0.261775	0	1	SLX4_5395	pool13	-0.865328	2.19504	-3.92569	28.5353	99.9497	SLX4 structure-specific endonuclease subunit
CDKN2D	-0.125634	-0.0576942	0	1	CDKN2D_938	pool13	-0.865766	0.831578	-2.56311	1290.97	1414.81	cyclin-dependent kinase inhibitor 2D (p19, inhibits CDK4)
XRCC5	-4.34316e-05	0.54806	0	0	XRCC5_1696	pool12	-0.865801	-1.7316	0	73.1069	21.6643	X-ray repair complementing defective repair in Chinese hamster cells 5
PSMB11	-0.289883	-0.135074	1	0	PSMB11_869	pool13	-0.865966	1.84038	-3.57231	21.6604	59.3492	proteasome (prosome, macropain) subunit, beta type, 11
TAOK3	-0.494036	-0.208871	1	1	TAOK3_1681	pool13	-0.868584	1.74986	-3.48702	656.599	592.463	TAO kinase 3
C12orf48	-0.175419	0.174574	0	2	C12orf48_1647	pool12	-0.869239	-1.73848	0	64.29	18.9166
ATRIP	-0.175094	0.185886	0	3	ATRIP_342	pool12	-0.869873	-0.419603	-1.32014	466.392	348.003	ATR interacting protein
FBXO6	-0.903785	-0.689732	0	0	FBXO6_698	pool13	-0.872247	0	-1.74449	1.81587	0.191143	F-box protein 6
AATF	-0.397181	-0.962175	1	0	AATF_1733	pool11	-0.872917	-4.52567	2.77984	43.3091	201.816	apoptosis antagonizing transcription factor
PRKCG	-0.840433	-1.24033	0	0	PRKCG_895	pool13	-0.874141	-2.34839	0.60011	772.601	529.697	protein kinase C gamma
XAB2	-0.234108	-0.118159	0	0	XAB2_180	pool12	-0.876575	-1.75315	0	209.585	61.8225	XPA binding protein 2
SMC1B	-0.327164	-0.665747	1	0	SMC1B_2703	pool13	-0.879227	0.195035	-1.95349	338.942	185.593	structural maintenance of chromosomes 1B
C10orf90	-0.344958	-0.0982149	0	0	C10orf90_1257	pool13	-0.879875	-1.81508	0.0553303	483.661	334.011	chromosome 10 open reading frame 90
E2F7	-0.0465786	-0.11685	0	2	E2F7_1423	pool12	-0.8879	-0.605751	-1.17005	3552.21	1781.71	E2F transcription factor 7
MCM8	-0.220548	-8.68676e-05	0	1	MCM8_1000	pool12	-0.888157	-1.77631	0	83.0259	23.8836	minichromosome maintenance 8 homologous recombination repair factor
HMGN1	-0.396964	-0.132768	0	0	HMGN1_1060	pool11	-0.892099	5.9865	-7.7707	157.794	45.6633	high mobility group nucleosome binding domain 1
EME2	-0.680478	-1.58503	0	0	EME2_1115	pool13	-0.893963	2.46869	-4.25662	21.1778	49.3255	essential meiotic structure-specific endonuclease subunit 2
FANCF	-0.394049	-0.290221	0	0	FANCF_1460	pool11	-0.894174	1.97581	-3.76416	26.4008	68.82	Fanconi anemia complementation group F
PPP2R5C	-0.0867691	0.107405	0	0	PPP2R5C_795	pool12	-0.898599	-7.42482	5.62762	85.9128	48.8895	protein phosphatase 2 regulatory subunit B', gamma
MSH6	-0.477165	-0.247107	0	0	MSH6_3908	pool11	-0.899199	0.421603	-2.22	5200.74	3742.83	mutS homolog 6
TCEA1	-0.0296531	-0.830326	1	1	TCEA1_404	pool12	-0.900683	-0.52039	-1.28098	5777.39	2509.7	transcription elongation factor A1
CDCA5	-0.16845	-0.341416	1	1	CDCA5_1552	pool12	-0.904393	-0.737265	-1.07152	172.993	103.158	cell division cycle associated 5
SMC2	-0.250805	-0.635261	0	1	SMC2_2580	pool11	-0.905043	-2.34381	0.533722	214.225	42.0224	structural maintenance of chromosomes 2
OGG1	-1.4698	-0.649752	1	0	OGG1_635	pool13	-0.905597	0.690887	-2.50208	341.494	158.597	8-oxoguanine DNA glycosylase
POLQ	-0.388383	-0.267687	0	1	POLQ_4470	pool11	-0.905852	-0.324708	-1.487	2173.05	1251.51	polymerase (DNA directed), theta
RAD54L	-0.289883	-0.224244	0	0	RAD54L_1753	pool11	-0.910616	-1.03759	-0.783638	485.339	252.434	RAD54-like (S. cerevisiae)
PSMD2	-0.0636371	0.358129	0	1	PSMD2_2891	pool12	-0.911443	-1.64557	-0.17732	297.29	231.285	proteasome 26S subunit, non-ATPase 2
MPG	-0.394479	-0.336488	0	0	MPG_403	pool12	-0.913362	-3.21989	1.39316	64.2711	156.221	N-methylpurine DNA glycosylase
C15orf42	-4	-0.966979	2	0	C15orf42_2008	pool13	-0.915189	-0.509152	-1.32123	2338.81	1302.03
E2F1	-0.0204972	-0.704873	0	0	E2F1_919	pool12	-0.915439	-1.83088	0	170.46	47.5558	E2F transcription factor 1
NEK11	-0.00335701	0.38764	0	0	NEK11_1410	pool12	-0.917135	-0.342996	-1.49127	1073.54	541.743	NIMA related kinase 11
FEN1	-0.0198148	0.677161	0	2	FEN1_779	pool12	-0.918227	-0.837942	-0.998513	126.324	70.1712	flap structure-specific endonuclease 1
OBFC2A	-0.000304113	0.287098	0	1	OBFC2A_2121	pool12	-0.918528	-0.929916	-0.907141	272.603	142.622
AXIN2	-0.335358	-0.0240171	0	0	AXIN2_3837	pool13	-0.92052	2.08051	-3.92155	929.731	2553.38	axin 2
BCL2	-0.438899	-0.341989	0	1	BCL2_280	pool13	-0.926155	-5.5863	3.73399	115.992	823.901	B-cell CLL/lymphoma 2
CXCR7	-0.59363	-0.521867	1	0	CXCR7_1327	pool13	-0.933288	-1.97099	0.104414	1392.73	943.74
CRADD	-0.720561	-0.236422	0	0	CRADD_1060	pool13	-0.934148	-2.93646	1.06816	210.114	258.977	CASP2 and RIPK1 domain containing adaptor with death domain
SPRED1	-0.494714	-0.600153	0	0	SPRED1_6831	pool13	-0.934788	-1.75157	-0.118004	2256.46	1151.77	sprouty-related, EVH1 domain containing 1
CHEK2	-0.185752	-0.136439	0	0	CHEK2_1384	pool11	-0.935575	-1.41341	-0.457739	30.5015	11.0686	checkpoint kinase 2
RPS3	-1.0575	-0.780154	1	0	RPS3_230	pool11	-0.942719	-1.88544	0	1.34733	0	ribosomal protein S3
FANCB	-0.815309	-1.92812	1	0	FANCB_1609	pool13	-0.943328	-1.12634	-0.760313	53.0411	28.4072	Fanconi anemia complementation group B
TRIP12	-0.0758241	-0.274415	1	1	TRIP12_1006	pool12	-0.944631	-0.40308	-1.48618	2359.05	1333.11	thyroid hormone receptor interactor 12
PSMD3	-0.18923	-0.464453	0	1	PSMD3_1366	pool12	-0.945464	-1.88834	-0.00258485	371.177	100.259	proteasome 26S subunit, non-ATPase 3
MLH1	-0.130944	-0.822464	0	0	MLH1_2216	pool11	-0.946665	-1.02276	-0.870571	2144.4	1112.68	mutL homolog 1
CDCA5	-0.16845	-0.341416	1	1	CDCA5_1575	pool12	-0.948244	-0.116139	-1.78035	201.246	75.9411	cell division cycle associated 5
PSMC6	-0.743282	-0.70708	1	0	PSMC6_632	pool13	-0.948879	-1.48616	-0.411597	1.06579	0	proteasome 26S subunit, ATPase 6
NIPBL	-0.242984	0.10824	0	0	NIPBL_8041	pool11	-0.949892	-3.49387	1.59409	755.998	1152.49	Nipped-B homolog (Drosophila)
CASP3	-0.215525	-0.447453	0	0	CASP3_1108	pool11	-0.954776	-0.757593	-1.15196	3293.63	1696.29	caspase 3
DDX1	-0.884389	-0.731422	2	1	DDX1_1613	pool13	-0.956265	2.13338	-4.04592	9.19984	8.01666	DEAD/H-box helicase 1
RAD21L1	-1.40121	-0.517698	1	0	RAD21L1_1304	pool13	-0.962405	-1.43435	-0.490463	2406.5	1271.95	RAD21 cohesin complex component like 1
ASH2L	-0.842846	-0.688246	0	0	ASH2L_381	pool13	-0.965442	-3.1994	1.26852	239.116	192.611	ash2 (absent, small, or homeotic)-like (Drosophila)
MYC	-0.0297461	-0.164627	0	2	MYC_2199	pool11	-0.967621	3.93868	-5.87392	63.3833	135.019	v-myc avian myelocytomatosis viral oncogene homolog
SPDYA	-0.165897	-0.218963	0	1	SPDYA_492	pool12	-0.970282	-0.670593	-1.26997	2690.95	1305.92	speedy/RINGO cell cycle regulator family member A
GML	-1.5157	-1.84164	1	1	GML_193	pool13	-0.971724	3.13061	-5.07406	16.3428	3.87903	glycosylphosphatidylinositol anchored molecule like
BRCA1	-0.519562	-0.419303	2	0	BRCA1_2561	pool11	-0.972227	0.865591	-2.81005	543.334	494.571	breast cancer 1
MCRS1	-0.0348924	-1.1152	2	1	MCRS1_344	pool12	-0.974788	-0.951063	-0.998513	61.85	31.4925	microspherule protein 1
TAF9B	-0.351445	-0.339894	0	0	TAF9B_564	pool13	-0.976261	3.29456	-5.24708	31.6392	133.439	TATA-box binding protein associated factor 9b
PHF1	-0.846185	-0.614751	1	0	PHF1_1025	pool13	-0.976817	-1.16046	-0.793172	1046.98	532.691	PHD finger protein 1
PRKDC	-0.582362	-0.433209	0	0	PRKDC_6503	pool11	-0.979038	-1.12688	-0.831194	2760.68	1393.96	protein kinase, DNA-activated, catalytic polypeptide
TFDP3	-0.369776	-0.497846	0	0	TFDP3_1411	pool13	-0.982566	-1.16251	-0.802621	1428.88	688.824	transcription factor Dp family member 3
NONO	-0.35164	-0.193142	0	0	NONO_2854	pool11	-0.98619	0.610868	-2.58325	425.599	383.66	non-POU domain containing, octamer-binding
PPP4C	-1.30016	-0.37202	1	0	PPP4C_273	pool11	-0.986346	2.62274	-4.59543	177.171	890.024	protein phosphatase 4 catalytic subunit
DDIT3	-0.0311436	-0.503901	0	0	DDIT3_6	pool12	-0.987544	-0.810495	-1.16459	413.244	211.821	DNA damage inducible transcript 3
FLJ35220	-0.242528	-0.778847	1	0	FLJ35220_362	pool13	-0.988058	-1.90359	-0.0725261	3220.61	1748.3
ALKBH2	-0.095555	0.164944	0	1	ALKBH2_806	pool12	-0.988909	-1.97782	0	1.46949	0	alkB homolog 2, alpha-ketoglutarate-dependent dioxygenase
XIAP	-0.439735	-0.924818	1	0	XIAP_2006	pool13	-0.989602	-4.56652	2.58732	22.9955	54.2229	X-linked inhibitor of apoptosis
POLD3	-0.000434512	-0.484789	0	0	POLD3_2162	pool11	-0.990807	-6.22304	4.24142	185.561	2410.49	polymerase (DNA-directed), delta 3, accessory subunit
MSH5	-0.401866	-0.37059	0	0	MSH5_2415	pool13	-0.991528	-2.82982	0.846759	1559.96	1412.03	mutS homolog 5
SSRP1	-0.142788	-0.122111	0	1	SSRP1_1951	pool11	-0.997513	0.528461	-2.52349	645.296	503.124	structure specific recognition protein 1
POLE2	-0.439854	-0.321391	2	0	POLE2_935	pool11	-1.00063	0.726244	-2.7275	5.41673	2.40842	polymerase (DNA directed), epsilon 2, accessory subunit
NSMCE4A	-0.202732	-0.148803	0	0	NSMCE4A_759	pool12	-1.00113	-1.41828	-0.583971	60.6821	22.2984	NSE4 homolog A, SMC5-SMC6 complex component
POLR2L	-0.0233291	0.256804	0	3	POLR2L_377	pool12	-1.00132	0.454348	-2.457	322.042	438.359	polymerase (RNA) II (DNA directed) polypeptide L, 7.6kDa
POLR2A	-1.10403	-1.1349	2	0	POLR2A_2702	pool13	-1.00386	-2.64006	0.632339	264.156	208.548	polymerase (RNA) II (DNA directed) polypeptide A, 220kDa
CHD1L	-0.121536	-0.344862	1	1	CHD1L_2972	pool11	-1.01334	5.19125	-7.21794	140.581	18.2157	chromodomain helicase DNA binding protein 1-like
LIG1	-0.391046	-0.167363	0	0	LIG1_1000	pool11	-1.01421	2.75349	-4.78191	41.1	190.642	ligase I, DNA, ATP-dependent
MDM4	-0.0109508	0.264641	0	2	MDM4_5211	pool12	-1.01542	-0.407175	-1.62367	4409.08	2046.45	MDM4, p53 regulator
NCOA6	-0.433563	-0.387534	2	0	NCOA6_6985	pool12	-1.01584	-1.86072	-0.170968	249.511	68.4347	nuclear receptor coactivator 6
PSMD2	-0.0636371	0.358129	0	1	PSMD2_889	pool12	-1.02262	1.3181	-3.36334	743.683	605.139	proteasome 26S subunit, non-ATPase 2
RAD23A	-1.36251	-1.24489	1	0	RAD23A_186	pool13	-1.02319	2.87886	-4.92524	21.5374	53.5306	RAD23 homolog A, nucleotide excision repair protein
MDM4	-0.0109508	0.264641	0	2	MDM4_5207	pool12	-1.02743	0.732162	-2.78702	2856.1	1619.67	MDM4, p53 regulator
LRDD	-0.299642	-0.502103	0	0	LRDD_2236	pool12	-1.03221	-1.48044	-0.583971	63.07	22.1927
BARD1	-0.0279361	-0.234108	0	0	BARD1_583	pool11	-1.03234	-0.619164	-1.44552	2599.75	1341.36	BRCA1 associated RING domain 1
SOD1	-0.0736061	-0.547294	1	1	SOD1_782	pool13	-1.03316	-0.348994	-1.71733	5571.73	2691.94	superoxide dismutase 1, soluble
MUS81	-0.0147083	-0.465593	0	0	MUS81_2287	pool11	-1.0344	-0.567037	-1.50177	2057.31	1095.12	MUS81 structure-specific endonuclease subunit
GTF2H2	-0.0456127	0.820448	0	0	GTF2H2_1403	pool12	-1.03557	1.45163	-3.52276	704.858	1167.87	general transcription factor IIH subunit 2
GTF2H1	-0.0310503	-0.437113	0	2	GTF2H1_2797	pool12	-1.03769	-0.485612	-1.58976	6117.64	3278.81	general transcription factor IIH subunit 1
UBE2T	-0.475085	-1.22841	1	0	UBE2T_582	pool13	-1.04513	-1.22512	-0.865139	420.461	210.926	ubiquitin conjugating enzyme E2T
POLK	-0.0439277	-0.708853	0	1	POLK_2603	pool13	-1.04614	2.3342	-4.42648	38.1407	122.122	polymerase (DNA directed) kappa
POLR2A	-1.10403	-1.1349	2	0	POLR2A_4177	pool13	-1.0516	1.39235	-3.49555	942.05	1098.68	polymerase (RNA) II (DNA directed) polypeptide A, 220kDa
RTEL1	-0.428408	-0.439496	0	0	RTEL1_1899	pool12	-1.05235	-4.02936	1.92466	381.415	1040.04	regulator of telomere elongation helicase 1
MORF4L1	-0.294136	-0.415895	0	1	MORF4L1_1206	pool13	-1.05665	-0.0281789	-2.08512	823.523	668.234	mortality factor 4 like 1
ATXN3	-0.691649	-0.481749	1	0	ATXN3_1197	pool13	-1.05742	2.74629	-4.86113	17.0941	23.4035	ataxin 3
SMC1B	-0.327164	-0.665747	1	0	SMC1B_1188	pool13	-1.05837	-2.85721	0.740479	1195.2	837.376	structural maintenance of chromosomes 1B
PSMD5	-0.0298392	0.543786	0	2	PSMD5_3157	pool12	-1.05853	-0.186363	-1.9307	3936.33	1966.92	proteasome 26S subunit, non-ATPase 5
POLE	-0.105462	-0.32781	0	1	POLE_1113	pool12	-1.05944	-1.53491	-0.583971	110.828	37.8333	polymerase (DNA directed), epsilon, catalytic subunit
INO80C	-0.00252624	-0.189029	0	0	INO80C_945	pool13	-1.06921	-1.41398	-0.724441	1679.38	812.883	INO80 complex subunit C
RAD51C	-4	-0.836839	2	0	RAD51C_173	pool13	-1.06952	-0.802472	-1.33656	176.1	89.4429	RAD51 paralog C
MPG	-0.394479	-0.336488	0	0	MPG_453	pool12	-1.07196	-1.55994	-0.583971	1.53528	0.10568	N-methylpurine DNA glycosylase
ACTL6A	-0.450016	-0.329012	0	0	ACTL6A_1680	pool11	-1.07651	0.193422	-2.34645	1723.9	1270.54	actin like 6A
ATM	-0.00493547	-0.522011	1	1	ATM_383	pool12	-1.08812	-0.687339	-1.4889	1385.16	590.881	ATM serine/threonine kinase
PCBP4	-0.744004	-0.905529	2	0	PCBP4_671	pool13	-1.09369	-3.89841	1.71102	193.735	99.4226	poly(rC) binding protein 4
RHNO1	-0.00370728	0.396423	0	2	RHNO1_1371	pool12	-1.09411	1.09041	-3.27864	1145.12	607.935	RAD9-HUS1-RAD1 interacting nuclear orphan 1
SNAI1	-0.780415	-0.988853	1	0	SNAI1_1019	pool13	-1.09636	-2.0974	-0.0953106	421.62	306.819	snail family zinc finger 1
FANCC	-0.0584886	-0.0715529	0	1	FANCC_568	pool12	-1.09839	-0.87664	-1.32014	203.354	110.118	Fanconi anemia complementation group C
NSMCE1	-0.0664621	0.0270108	1	1	NSMCE1_510	pool12	-1.09914	1.26499	-3.46327	1007.88	483.283	NSE1 homolog, SMC5-SMC6 complex component
RPA2	-0.708853	-0.608359	1	0	RPA2_1687	pool12	-1.10413	-0.888118	-1.32014	187.373	100.607	replication protein A2
CLU	-0.0866631	0.181246	0	1	CLU_1844	pool12	-1.10767	-2.21275	-0.00258485	165.449	35.6885	clusterin
TONSL	-1.79588	-0.605548	1	0	TONSL_2815	pool13	-1.10848	-0.112087	-2.10487	1.83093	0.129301	tonsoku-like, DNA repair protein
HMGA1	-0.324497	-0.120904	0	0	HMGA1_1651	pool13	-1.11158	0.141683	-2.36484	1589.29	1086.05	high mobility group AT-hook 1
STRA13	-0.203634	-1.37779	0	1	STRA13_675	pool12	-1.11798	-1.49672	-0.739233	2393.66	1119.91	stimulated by retinoic acid 13
POLR2D	-0.0399099	0.742561	0	0	POLR2D_1498	pool11	-1.11922	-0.200885	-2.03755	626.706	356.742	polymerase (RNA) II (DNA directed) polypeptide D
TDP1	-0.00682839	-0.245422	1	1	TDP1_2447	pool12	-1.12662	-2.25325	0	20.0217	3.80446	tyrosyl-DNA phosphodiesterase 1
NPM1	-0.280337	-0.562884	0	0	NPM1_343	pool11	-1.13701	1.33499	-3.609	67.1287	155.98	nucleophosmin (nucleolar phosphoprotein B23, numatrin)
DDIT4	-0.00182788	0.164309	0	2	DDIT4_1679	pool11	-1.13835	-1.18837	-1.08834	1028.04	470.368	DNA damage inducible transcript 4
PSMB8	-0.476904	-0.618524	0	0	PSMB8_898	pool11	-1.1408	0.379484	-2.66108	302.633	269.035	proteasome subunit beta 8
DYRK1A	-0.588717	-0.516128	2	1	DYRK1A_4494	pool13	-1.14126	-2.55066	0.268138	2763.87	1837.07	dual specificity tyrosine phosphorylation regulated kinase 1A
BRE	-1.88606	-0.57659	2	0	BRE_1677	pool13	-1.14149	-0.285765	-1.99721	1703.76	905.363	brain and reproductive organ-expressed (TNFRSF1A modulator)
LIG3	-0.184754	-0.0290026	0	2	LIG3_752	pool12	-1.14315	-2.11534	-0.170968	70.6011	16.0177	ligase III, DNA, ATP-dependent
SMC4	-0.448916	-0.309627	0	0	SMC4_4581	pool11	-1.14575	-1.00112	-1.29037	1129.01	497.365	structural maintenance of chromosomes 4
INTS3	-0.159957	-0.603975	1	0	INTS3_2781	pool12	-1.1485	0.295159	-2.59216	5467.63	1985.73	integrator complex subunit 3
ING4	-0.0320778	-0.548367	0	1	ING4_319	pool12	-1.14937	-1.48945	-0.809302	785.218	279.385	inhibitor of growth family member 4
UBE2T	-0.475085	-1.22841	1	0	UBE2T_448	pool13	-1.15391	-1.15332	-1.15451	304.157	136.144	ubiquitin conjugating enzyme E2T
NEK6	-0.674074	-0.360912	0	0	NEK6_2437	pool12	-1.15797	-2.14497	-0.170968	171.628	38.5274	NIMA related kinase 6
SHPRH	-0.904134	-0.544546	2	0	SHPRH_4284	pool13	-1.15838	0.880715	-3.19747	27.5894	37.621	SNF2 histone linker PHD RING helicase, E3 ubiquitin protein ligase
PHLDA3	-0.160396	0.0166895	0	2	PHLDA3_689	pool12	-1.15955	-2.14813	-0.170968	22.1081	4.70995	pleckstrin homology like domain family A member 3
UACA	-0.0275195	0.33762	0	1	UACA_3005	pool12	-1.16284	-0.189036	-2.13663	4450.46	1959.91	uveal autoantigen with coiled-coil domains and ankyrin repeats
DDIT4	-0.00182788	0.164309	0	2	DDIT4_1681	pool11	-1.16436	0.330187	-2.65891	667.16	613.4	DNA damage inducible transcript 4
PARP2	-2.03152	-0.614215	1	0	PARP2_1796	pool13	-1.16528	-0.42779	-1.90278	4905.67	2483.26	poly(ADP-ribose) polymerase 2
POLD1	-0.0635868	0.454817	0	4	POLD1_1236	pool11	-1.16766	3.09926	-5.43458	44.5023	121.396	polymerase (DNA directed), delta 1, catalytic subunit
PSMB1	-0.343423	-0.324863	0	0	PSMB1_378	pool11	-1.17011	-1.09688	-1.24333	1007.45	451.388	proteasome subunit beta 1
TOPBP1	-0.193413	-0.00651968	0	1	TOPBP1_5310	pool12	-1.17133	-1.75517	-0.587492	738.745	218.785	topoisomerase (DNA) II binding protein 1
NUDT16	-0.44406	-0.330404	1	0	NUDT16_191	pool13	-1.17177	0.579867	-2.92341	760.211	463.629	nudix hydrolase 16
PGAP2	-0.0143939	-0.476774	0	1	PGAP2_1546	pool12	-1.17546	-0.390345	-1.96057	1075.6	432.943	post-GPI attachment to proteins 2
POLD2	-0.842543	-0.601713	0	0	POLD2_536	pool11	-1.17628	0	-2.35255	2.05363	0	polymerase (DNA directed), delta 2, accessory subunit
CLSPN	-0.0455645	-0.0318908	0	1	CLSPN_773	pool13	-1.17804	-4.96342	2.60733	129.385	625.618	claspin
XRCC2	-0.388064	-1.54975	1	0	XRCC2_1751	pool12	-1.17852	1.06982	-3.42685	950.56	930.891	X-ray repair complementing defective repair in Chinese hamster cells 2
KIAA1530	-0.299123	-0.267204	0	0	KIAA1530_916	pool13	-1.17911	-0.977473	-1.38074	315.387	142.693
NEK6	-0.674074	-0.360912	0	0	NEK6_1891	pool12	-1.18155	0.744743	-3.10784	341.751	564.389	NIMA related kinase 6
EEPD1	-0.0433514	-0.445511	0	1	EEPD1_2340	pool12	-1.18338	-1.78279	-0.583971	48.7425	13.7383	endonuclease/exonuclease/phosphatase family domain containing 1
SHPRH	-0.904134	-0.544546	2	0	SHPRH_6387	pool13	-1.18411	0.967133	-3.33536	1125.17	719.634	SNF2 histone linker PHD RING helicase, E3 ubiquitin protein ligase
CRIP1	-0.059633	-0.4011	0	1	CRIP1_20	pool11	-1.18864	-1.91953	-0.457739	9.84252	2.18459	cysteine rich protein 1
BRE	-1.88606	-0.57659	2	0	BRE_637	pool13	-1.19166	-1.05173	-1.3316	1293.26	574.78	brain and reproductive organ-expressed (TNFRSF1A modulator)
GTF2H3	-0.34113	-0.345823	0	0	GTF2H3_730	pool11	-1.19209	0.451518	-2.8357	64.1742	81.7819	general transcription factor IIH subunit 3
NEIL2	-4	-0.877784	2	0	NEIL2_1565	pool13	-1.19392	-2.75563	0.367785	432.564	293.259	nei like DNA glycosylase 2
C15orf42	-4	-0.966979	2	0	C15orf42_1349	pool13	-1.19642	0.747304	-3.14014	722.047	644.032
CSNK1E	-0.144541	0.0710412	0	1	CSNK1E_1966	pool12	-1.20453	-4.90484	2.49579	30.3081	2.84858	casein kinase 1 epsilon
ASH2L	-0.842846	-0.688246	0	0	ASH2L_391	pool13	-1.20885	-0.761701	-1.656	653.229	308.44	ash2 (absent, small, or homeotic)-like (Drosophila)
ABL1	-0.291154	-0.50515	0	1	ABL1_2949	pool11	-1.2095	0.575597	-2.9946	22.7218	14.3049	ABL proto-oncogene 1, non-receptor tyrosine kinase
MORF4L2	-0.216883	-0.048177	0	1	MORF4L2_1119	pool12	-1.20998	0.0952426	-2.51519	1132.44	578.403	mortality factor 4 like 2
ERCC2	-0.525492	-0.298864	1	0	ERCC2_315	pool13	-1.21055	3.03468	-5.45577	941.321	2674.33	excision repair cross-complementation group 2
TREX1	-0.0404816	0.564156	0	2	TREX1_1461	pool12	-1.21096	1.56654	-3.98846	1780.31	1645.19	three prime repair exonuclease 1
ATM	-0.00493547	-0.522011	1	1	ATM_3334	pool12	-1.21315	-0.186519	-2.23978	8765.74	4259.74	ATM serine/threonine kinase
RBX1	-0.580209	-0.510886	1	1	RBX1_700	pool13	-1.21678	-0.443909	-1.98965	1.66585	0	ring-box 1, E3 ubiquitin protein ligase
FANCA	-0.00722564	0.373968	0	0	FANCA_268	pool12	-1.21798	-2.26499	-0.170968	777.791	161.538	Fanconi anemia complementation group A
PMS2	-0.753501	-0.461049	3	0	PMS2_566	pool13	-1.22048	-0.840703	-1.60025	750.295	320.933	PMS1 homolog 2, mismatch repair system component
FANCG	-0.346691	-0.311047	0	0	FANCG_2443	pool11	-1.22163	-1.11884	-1.32442	889.756	381.524	Fanconi anemia complementation group G
ING2	-0.0163286	0.532836	0	2	ING2_392	pool12	-1.22273	0.0342685	-2.47973	3880.3	2168.91	inhibitor of growth family member 2
TAOK1	-0.114074	-0.140802	1	1	TAOK1_4803	pool12	-1.22771	-0.626158	-1.82925	341.086	186.532	TAO kinase 1
PSMA2	-1.2321	-0.405718	2	0	PSMA2_973	pool11	-1.23693	-0.040591	-2.43326	3319.59	1836.05	proteasome subunit alpha 2
MNAT1	-0.334982	-0.15683	0	0	MNAT1_966	pool13	-1.23705	-5.54213	3.06803	70.0925	349.922	MNAT CDK-activating kinase assembly factor 1
KIN	-0.64321	-0.610657	0	0	KIN_953	pool12	-1.23714	-2.21842	-0.255859	859.439	339.376	Kin17 DNA and RNA binding protein
XRCC6BP1	-0.957031	-0.825649	2	0	XRCC6BP1_894	pool13	-1.2384	-5.76899	3.29218	103.88	552.984
C16orf5	-0.160899	-0.370285	0	0	C16orf5_830	pool13	-1.23996	1.94431	-4.42423	20.6831	41.6349
PSMB11	-0.289883	-0.135074	1	0	PSMB11_871	pool13	-1.24364	-0.582739	-1.90455	1154.7	543.432	proteasome (prosome, macropain) subunit, beta type, 11
TIPIN	-0.397289	-0.164246	1	1	TIPIN_1003	pool11	-1.24646	0.406584	-2.8995	427.836	367.975	TIMELESS interacting protein
EYA2	-0.702896	-0.578232	1	0	EYA2_2418	pool11	-1.24878	0.174733	-2.6723	1241.19	652.004	EYA transcriptional coactivator and phosphatase 2
CHEK1	-0.0594337	0.00718148	0	2	CHEK1_671	pool11	-1.25434	-2.05094	-0.457739	1.75857	0	checkpoint kinase 1
RPS27A	-0.259716	-0.0225965	0	1	RPS27A_75	pool12	-1.25922	-2.34747	-0.170968	130.299	25.3175	ribosomal protein S27a
TRIM32	-1.04624	-0.497846	1	0	TRIM32_3379	pool13	-1.26043	0	-2.52087	3.46665	0.191143	tripartite motif containing 32
PARP9	-0.605723	-0.36231	0	1	PARP9_1731	pool12	-1.26159	-2.35222	-0.170968	410.787	80.1651	poly(ADP-ribose) polymerase family member 9
KIAA0415	-0.0295137	4	0	1	KIAA0415_2524	pool12	-1.26275	0.112579	-2.63807	3415.36	1598.63
CLSPN	-0.0455645	-0.0318908	0	1	CLSPN_6012	pool13	-1.26392	1.01419	-3.54204	594.566	592.132	claspin
TMEM109	-0.212044	-0.247644	1	2	TMEM109_1127	pool12	-1.26433	-4.63869	2.11002	155.609	13.8273	transmembrane protein 109
PSEN1	-0.360215	-0.315514	0	0	PSEN1_2864	pool13	-1.26987	-1.63741	-0.902335	452.489	174.878	presenilin 1
CRADD	-0.720561	-0.236422	0	0	CRADD_214	pool13	-1.27085	3.21936	-5.76107	149.881	574.08	CASP2 and RIPK1 domain containing adaptor with death domain
SOX4	-0.337998	-0.188626	1	0	SOX4_4446	pool11	-1.27206	1.06422	-3.60834	455.974	289.661	SRY-box 4
POLD2	-0.842543	-0.601713	0	0	POLD2_1235	pool11	-1.27885	-7.92809	5.37039	210.328	769.594	polymerase (DNA directed), delta 2, accessory subunit
ACTL6A	-0.450016	-0.329012	0	0	ACTL6A_1061	pool11	-1.28221	-0.466216	-2.0982	1767.84	876.104	actin like 6A
ERCC2	-0.525492	-0.298864	1	0	ERCC2_519	pool13	-1.28669	-6.52205	3.94867	200.769	755.225	excision repair cross-complementation group 2
SPATA18	-1.51713	-0.559406	1	0	SPATA18_3418	pool13	-1.28849	3.57385	-6.15084	86.3996	132.59	spermatogenesis associated 18
CRY1	-0.0981604	-0.208801	0	1	CRY1_1370	pool11	-1.28988	-0.44772	-2.13203	3349.15	1844.72	cryptochrome circadian clock 1
TRIM32	-1.04624	-0.497846	1	0	TRIM32_904	pool13	-1.2956	4.60778	-7.19898	99.4458	657.366	tripartite motif containing 32
RPAIN	-0.0450824	-1.29499	0	0	RPAIN_287	pool12	-1.29563	-0.743374	-1.84789	3660.27	1212.47	RPA interacting protein
MRPS11	-0.309981	-0.398483	0	0	MRPS11_577	pool12	-1.29711	-2.59423	0	218.219	35.7197	mitochondrial ribosomal protein S11
DTL	-0.0286314	-1.49894	0	0	DTL_534	pool11	-1.29812	-2.1385	-0.457739	4.45322	0.582558	denticleless E3 ubiquitin protein ligase homolog
PMS1	-0.255942	-0.25189	0	1	PMS1_1091	pool12	-1.29934	-0.103845	-2.49483	1507.56	811.107	PMS1 homolog 1, mismatch repair system component
PSMD4	-0.23381	-0.437113	1	1	PSMD4_151	pool13	-1.30121	-3.72789	1.12547	60.4358	119.082	proteasome 26S subunit, non-ATPase 4
NEK1	-0.844057	-2.27572	2	0	NEK1_1717	pool13	-1.30204	-0.627316	-1.97676	985.859	505.416	NIMA related kinase 1
RPA4	-0.0797201	0.106627	0	1	RPA4_779	pool12	-1.30478	0.956871	-3.56643	257.068	160.859	replication protein A4
HIPK1	-0.603452	-0.632831	2	0	HIPK1_1595	pool13	-1.31038	-1.51681	-1.10395	2566.83	1064.2	homeodomain interacting protein kinase 1
POLR2G	-0.453211	-0.353302	0	0	POLR2G_526	pool11	-1.31098	2.58077	-5.20273	566.238	386.48	polymerase (RNA) II (DNA directed) polypeptide G
MMS19	-1.25026	-2.79588	2	0	MMS19_3336	pool13	-1.31104	0.865119	-3.48719	703.704	578.549	MMS19 homolog, cytosolic iron-sulfur assembly component
PSMC1	-4	-0.876148	2	0	PSMC1_95	pool13	-1.31184	1.32077	-3.94445	90.4304	101.265	proteasome 26S subunit, ATPase 1
FTO	-0.680062	-1.7986	1	0	FTO_2945	pool13	-1.31192	-1.10663	-1.51721	2252.71	925.216	fat mass and obesity associated
POLG2	-0.196543	-0.0180003	0	1	POLG2_558	pool11	-1.31479	-3.16329	0.533722	139.673	15.3703	polymerase (DNA directed), gamma 2, accessory subunit
TP53BP1	-0.0538918	-0.120159	0	0	TP53BP1_5913	pool12	-1.31561	0.359924	-2.99114	6056.38	3240.92	tumor protein p53 binding protein 1
CHRNA4	-0.318578	-0.993106	0	0	CHRNA4_2338	pool13	-1.31623	-0.116666	-2.5158	132.789	72.0489	cholinergic receptor nicotinic alpha 4 subunit
ASTE1	-0.0257186	-0.14315	0	0	ASTE1_1247	pool11	-1.31803	0.482709	-3.11877	12.5241	9.83604	asteroid homolog 1 (Drosophila)
NONO	-0.35164	-0.193142	0	0	NONO_1091	pool11	-1.32089	4.06973	-6.71152	52.3501	15.4378	non-POU domain containing, octamer-binding
PARP1	-0.0656531	0.230992	0	3	PARP1_1378	pool12	-1.32158	-0.35398	-2.28918	3057.51	1269.62	poly(ADP-ribose) polymerase 1
INO80C	-0.00252624	-0.189029	0	0	INO80C_937	pool13	-1.33226	-0.02722	-2.63729	1025.09	662.787	INO80 complex subunit C
POLD3	-0.000434512	-0.484789	0	0	POLD3_2158	pool11	-1.33255	-1.27293	-1.39217	728.376	286.515	polymerase (DNA-directed), delta 3, accessory subunit
ATR	-1.38405	-0.745694	2	0	ATR_814	pool13	-1.33272	-5.67739	3.01196	311.018	2256.77	ATR serine/threonine kinase
PPP1R15A	-1.13847	-1.50864	1	0	PPP1R15A_964	pool13	-1.33311	-3.40326	0.737033	2723.56	1604.59	protein phosphatase 1 regulatory subunit 15A
POLR2C	-1.46725	-3.30103	2	0	POLR2C_1746	pool13	-1.3366	-2.0076	-0.665595	3568	1593.24	polymerase (RNA) II (DNA directed) polypeptide C, 33kDa
PSMA6	-0.221126	0.091247	0	1	PSMA6_302	pool12	-1.33965	-3.12164	0.442335	1908.36	2583.45	proteasome subunit alpha 6
ERCC8	-0.37789	-0.147276	0	1	ERCC8_1196	pool11	-1.33994	-0.888558	-1.79133	2158.34	878.605	excision repair cross-complementation group 8
FOXO3	-0.983803	-1.69465	1	0	FOXO3_1572	pool13	-1.34699	-1.28755	-1.40642	1.54596	0	forkhead box O3
PSMD10	-0.548828	-0.718967	0	0	PSMD10_1305	pool13	-1.35275	-4.98296	2.27747	272.835	1250.46	proteasome 26S subunit, non-ATPase 10
SFN	-0.383419	-1.64397	2	0	SFN_1234	pool13	-1.35746	0.331822	-3.04675	3.63173	0.129301	stratifin
PARG	-0.809388	-1.25727	2	0	PARG_2190	pool13	-1.36149	-0.267577	-2.4554	1514.84	769.073	poly(ADP-ribose) glycohydrolase
WDR33	-0.901702	-0.444664	1	0	WDR33_480	pool13	-1.36518	-1.72058	-1.00978	716.535	288.67	WD repeat domain 33
KIAA1530	-0.299123	-0.267204	0	0	KIAA1530_2002	pool13	-1.3845	-6.06463	3.29563	54.5914	216.757
HERC2	-0.528708	-0.449772	1	0	HERC2_3697	pool13	-1.38741	1.22646	-4.00128	545.262	520.01	HECT and RLD domain containing E3 ubiquitin protein ligase 2
RPA2	-0.708853	-0.608359	1	0	RPA2_1688	pool12	-1.39758	-2.94345	0.148282	307.569	40.5786	replication protein A2
MRPS9	-0.415556	-0.310425	2	0	MRPS9_793	pool13	-1.40089	2.32776	-5.12954	96.4459	400.833	mitochondrial ribosomal protein S9
TMEM109	-0.212044	-0.247644	1	2	TMEM109_1428	pool12	-1.40427	-2.22457	-0.583971	2.08634	0	transmembrane protein 109
USP7	-4	-1.29243	3	0	USP7_2241	pool13	-1.40577	-0.0214625	-2.79008	512.709	365.512	ubiquitin specific peptidase 7 (herpes virus-associated)
SIRT6	-0.289544	-0.679646	1	1	SIRT6_477	pool12	-1.4076	-3.03442	0.219225	17.9491	2.35378	sirtuin 6
RAD51AP1	-0.2909	-0.253599	0	0	RAD51AP1_999	pool11	-1.41055	4.4326	-7.25369	110.187	15.3703	RAD51 associated protein 1
SMYD2	-0.293965	-0.0543837	0	1	SMYD2_1344	pool13	-1.4121	-0.190029	-2.63418	551.225	218.491	SET and MYND domain containing 2
C19orf40	-0.168386	0.132238	0	1	C19orf40_814	pool12	-1.41238	-2.82476	0	105.619	14.4781
PRKDC	-0.582362	-0.433209	0	0	PRKDC_3599	pool11	-1.41242	-0.220689	-2.60414	2174.05	1236.55	protein kinase, DNA-activated, catalytic polypeptide
MUC1	-0.173925	-0.199008	1	1	MUC1_349	pool12	-1.41739	-2.83478	0	135.009	18.4939	mucin 1, cell surface associated
FOXN3	-0.15789	0.169475	0	2	FOXN3_6055	pool12	-1.4226	-3.25821	0.413003	149.887	15.3836	forkhead box N3
BRCC3	-0.400444	-0.220981	0	0	BRCC3_494	pool13	-1.42387	-0.443909	-2.40383	2.32617	0	BRCA1/BRCA2-containing complex subunit 3
CHCHD6	-0.368049	-0.853872	0	0	CHCHD6_879	pool13	-1.42541	-0.646397	-2.20442	1603.71	712.884	coiled-coil-helix-coiled-coil-helix domain containing 6
PML	-0.285922	-0.135311	0	1	PML_886	pool12	-1.42852	-2.85705	0	3.12266	0	promyelocytic leukemia
ACD	-1.266	-0.533874	1	0	ACD_1007	pool13	-1.43056	1.75996	-4.62107	30.7391	49.5841	adrenocortical dysplasia homolog (mouse)
[truncated: 1,802 more rows]
